# Supplementary material for: Single Nucleus Genome Sequencing Reveals High Similarity among Nuclei of an Endomycorrhizal Fungus
Source: PubMed Central journal article supplement (PMC3886924; doi:10.1371/journal.pgen.1004078), 2014-01-09

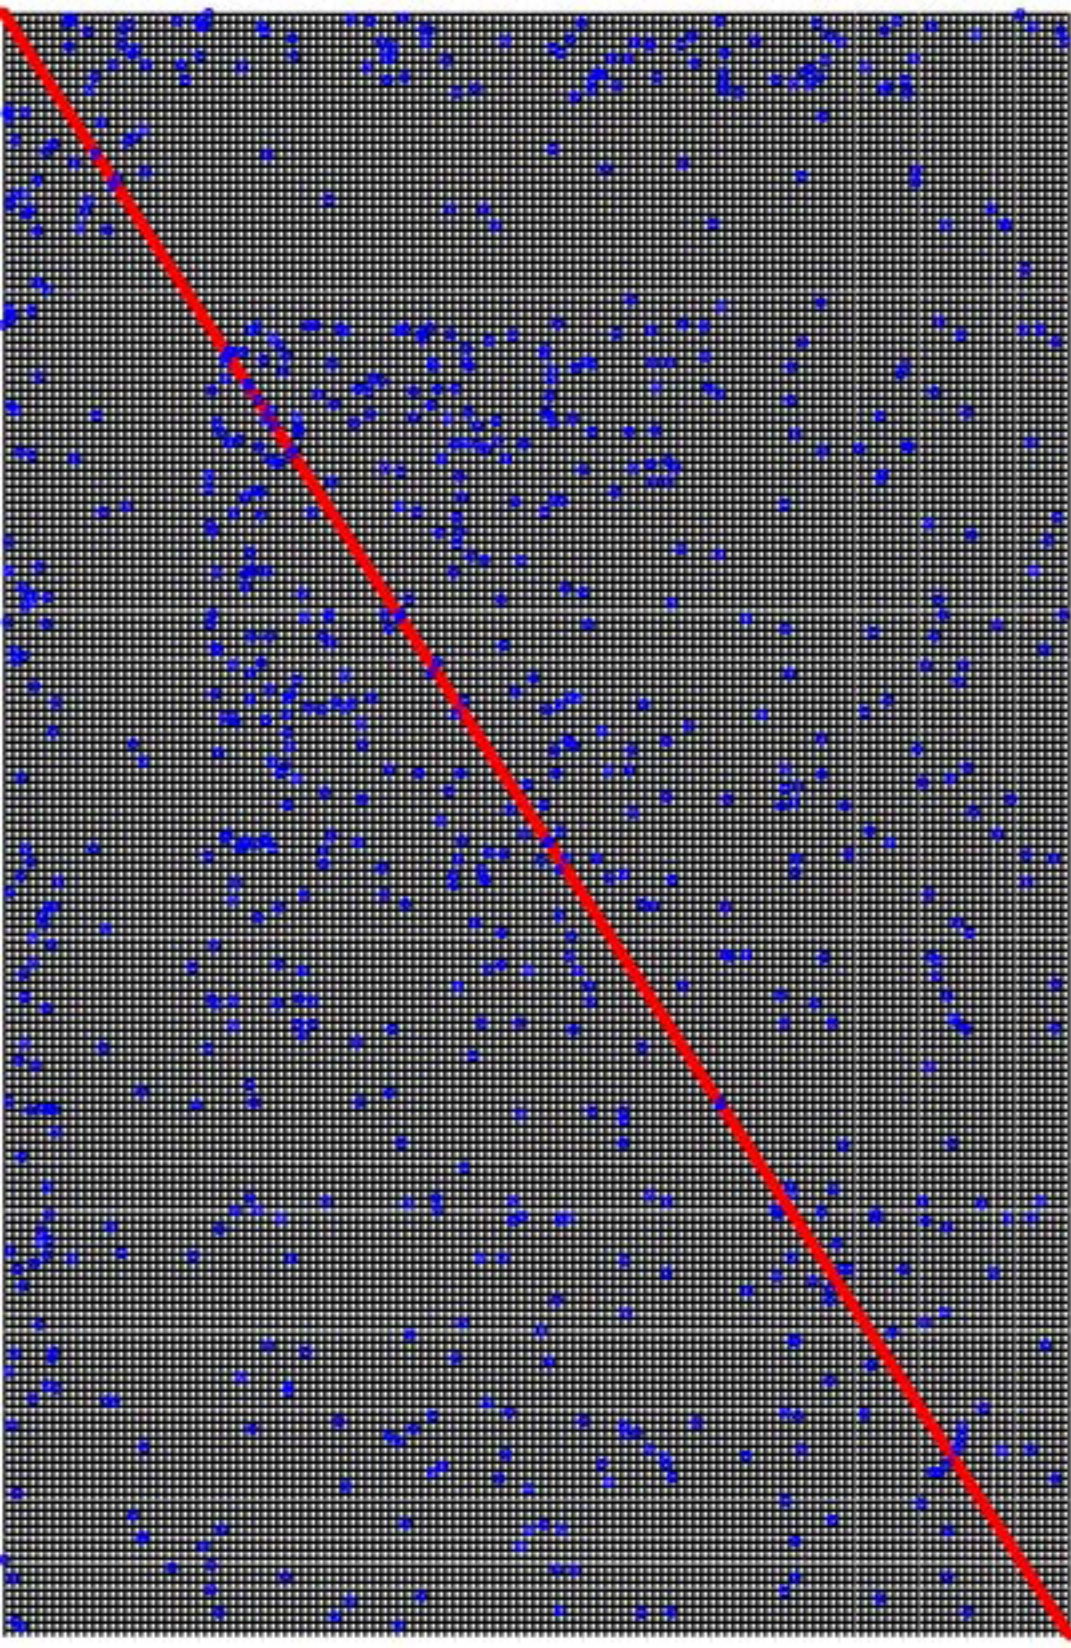

Supplement: pgen.1004078.s001.pdf [file pgen.1004078.s001.pdf]
