# Supplementary material for: Single Nucleus Genome Sequencing Reveals High Similarity among Nuclei of an Endomycorrhizal Fungus
Source: PubMed Central journal article supplement (PMC3886924; doi:10.1371/journal.pgen.1004078), 2014-01-09
Supplement: pgen.1004078.s002.pdf [file pgen.1004078.s002.pdf]

```

RirG174000|0|DNA1 ATATTCGTCAAAGGCTCTTAAACTTACGGCGAATAGTATGTATGGTTGTTTTGGGTTATA
RirG174000|0|DNA2 ATATTCGTCAAAGGCTCTTAAACTTACGGCGAATAGTATGTATGGTTGTTTTGGGTTATA
RirG174000|0|Rir ATATTCGTCAAAGGCTCTTAAACTTACGGCGAATAGTATGTATGGTTGTTTTGGGTTATA
RirG174000|0|N31 ATATTCGTCAAAGGCTCTTAAACTTACGGCGAATAGTATGTATGGTTGTTTTGGGTTATA
RirG174000|0|N33 ATATTCGTCAAAGGCTCTTAAACTTACGGCGAATAGTATGTATGGTTGTTTTGGGTTATA
RirG174000|0|N6 ATATTCGTCAAAGGCTCTTAAACTTACGGCGAATAGTATGTATGGTTGTTTTGGGTTATA
RirG174000|0|N36 ATATTCGTCAAAGGCTCTTAAACTTACGGCGAATAGTATGTATGGTTGTTTTGGGTTATA
*****

RirG174000|0|DNA1 CTTACTCCAGGTTTTATGCCAAGCCGTTAGCTATGTTGATCACTTTCAAAGGTCGTGAAA
RirG174000|0|DNA2 CTTACTCCAGGTTTTATGCCAAGCCGTTAGCTATGTTGATCACTTTCAAAGGTCGTGAAA
RirG174000|0|Rir CTTACTCCAGGTTTTATGCCAAGCCGTTAGCTATGTTGATCACTTTCAAAGGTCGTGAAA
RirG174000|0|N31 CTTACTCCAGGTTTTATGCCAAGCCGTTAGCTATGTTGATCACTTTCAAAGGTCGTGAAA
RirG174000|0|N33 CTTACTCCAGGTTTTATGCCAAGCCGTTAGCTATGTTGATCACTTTCAAAGGTCGTGAAA
RirG174000|0|N6 CTTACTCCAGGTTTTATGCCAAGCCGTTAGCTATGTTGATCACTTTCAAAGGTCGTGAAA
RirG174000|0|N36 CTTACTCCAGGTTTTATGCCAAGCCGTTAGCTATGTTGATCACTTTCAAAGGTCGTGAAA
*****

RirG174000|0|DNA1 TTCTGGAAAACACTGTAAATTAGCGGAGAACGAGAAGATGGAGGTATGTTATTTAATAA
RirG174000|0|DNA2 TTCTGGAAAACACTGTAAATTAGCGGAGAACGAGAAGATGGAGGTATGTTATTTAATAA
RirG174000|0|Rir TTCTGGAAAACACTGTAAATTAGCGGAGAACGAGAAGATGGAGGTATGTTATTTAATAA
RirG174000|0|N31 TTCTGGAAAACACTGTAAATTAGCGGAGAACGAGAAGATGGAGGTATGTTATTTAATAA
RirG174000|0|N33 TTCTGGAAAACACTGTAAATTAGCGGAGAACGAGAAGATGGAGGTATGTTATTTAATAA
RirG174000|0|N6 TTCTGGAAAACACTGTAAATTAGCGGAGAACGAGAAGATGGAGGTATGTTATTTAATAA
RirG174000|0|N36 TTCTGGAAAACACTGTAAATTAGCGGAGAACGAGAAGATGGAGGTATGTTATTTAATAA
*****

RirG174000|0|DNA1 TTTGATTTAATAAGCAAACAAGCGAACGATTACATTGATTTTTATGCTTTTATTTAAGGT
RirG174000|0|DNA2 TTTGATTTAATAAGCAAACAAGCGAACGATTACATTGATTTTTATGCTTTTATTTAAGGT
RirG174000|0|Rir TTTGATTTAATAAGCAAACAAGCGAACGATTACATTGATTTTTATGCTTTTATTTAAGGT
RirG174000|0|N31 TTTGATTTAATAAGCAAACAAGCGAACGATTACATTGATTTTTATGCTTTTATTTAAGGT
RirG174000|0|N33 TTTGATTTAATAAGCAAACAAGCGAACGATTACATTGATTTTTATGCTTTTATTTAAGGT
RirG174000|0|N6 TTTGATTTAATAAGCAAACAAGCGAACGATTACATTGATTTTTATGCTTTTATTTAAGGT
RirG174000|0|N36 TTTGATTTAATAAGCAAACAAGCGAACGATTACATTGATTTTTATGCTTTTATTTAAGGT
*****

RirG174000|0|DNA1 AATTTATGGAGATACAGATTCATTATGATTAACACTAAAGCAATAGACATAAATCAAGC
RirG174000|0|DNA2 AATTTATGGAGATACAGATTCATTATGATTAACACTAAAGCAATAGACATAAATCAAGC
RirG174000|0|Rir AATTTATGGAGATACAGATTCATTATGATTAACACTAAAGCAATAGACATAAATCAAGC
RirG174000|0|N31 AATTTATGGAGATACAGATTCATTATGATTAACACTAAAGCAATAGACATAAATCAAGC
RirG174000|0|N33 AATTTATGGAGATACAGATTCATTATGATTAACACTAAAGCAATAGACATAAATCAAGC
RirG174000|0|N6 AATTTATGGAGATACAGATTCATTATGATTAACACTAAAGCAATAGACATAAATCAAGC
RirG174000|0|N36 AATTTATGGAGATACAGATTCATTATGATTAACACTAAAGCAATAGACATAAATCAAGC
*****

RirG174000|0|DNA1 GCTTGAAGTTGGTAACATCTTAAAAAAGAAAGTCAATGAACGATACAAATTGCTCGAGCT
RirG174000|0|DNA2 GCTTGAAGTTGGTAACATCTTAAAAAAGAAAGTCAATGAACGATACAAATTGCTCGAGCT
RirG174000|0|Rir GCTTGAAGTTGGTAACATCTTAAAAAAGAAAGTCAATGAACGATACAAATTGCTCGAGCT
RirG174000|0|N31 GCTTGAAGTTGGTAACATCTTAAAAAAGAAAGTCAATGAACGATACAAATTGCTCGAGCT
RirG174000|0|N33 GCTTGAAGTTGGTAACATCTTAAAAAAGAAAGTCAATGAACGATACAAATTGCTCGAGCT
RirG174000|0|N6 GCTTGAAGTTGGTAACATCTTAAAAAAGAAAGTCAATGAACGATACAAATTGCTCGAGCT
RirG174000|0|N36 GCTTGAAGTTGGTAACATCTTAAAAAAGAAAGTCAATGAACGATACAAATTGCTCGAGCT
*****

RirG174000|0|DNA1 TG
RirG174000|0|DNA2 TG
RirG174000|0|Rir TG
RirG174000|0|N31 TG
RirG174000|0|N33 TG
RirG174000|0|N6 TG
RirG174000|0|N36 TG
**

```

Figure S2. Alignments of POL1-like (PLS) sequences (RirG174000) across seven *R. irregularis* assemblies. The PLS sequence AY330523.1 of *Glomus etunicatum* was used to identify the homologous sequences in the six assemblies.
