# Supplementary material for: Single Nucleus Genome Sequencing Reveals High Similarity among Nuclei of an Endomycorrhizal Fungus
Source: PubMed Central journal article supplement (PMC3886924; doi:10.1371/journal.pgen.1004078), 2014-01-09
Supplement: pgen.1004078.s003.pdf [file pgen.1004078.s003.pdf]

**BIP1:**

|                   |   |      |                                                      |
|-------------------|---|------|------------------------------------------------------|
| BIP1_RirG196040   | 1 | DNA1 | ATGAAGAAAGCTACTTTCTTTAAATTTATTGCAGTGTTATGTTCACTGTT   |
| BIP1_RirG196040   | 3 | N33  | -----                                                |
| RiBIP1_RirG196040 |   |      | ATGAAGAAAGCTACTTTCTTTAAATTTATTGCAGTGTTATGTTCACTGTT   |
| BIP1_RirG196040   | 0 | DNA2 | ATGAAGAAAGCTACTTTCTTTAAATTTATTGCAGTGTTATGTTCACTGTT   |
| BIP1_RirG196040   | 2 | N6   | ATGAAGAAAGCTACTTTCTTTAAATTTATTGCAGTGTTATGTTCACTGTT   |
|                   |   |      |                                                      |
| BIP1_RirG196040   | 1 | DNA1 | AATAACTATTCCTAATGTAATAGTAATTTCTGATGAGAAACCTAACGTTG   |
| BIP1_RirG196040   | 3 | N33  | -----                                                |
| RiBIP1_RirG196040 |   |      | AATAACTATTCCTAATGTAATAGTAATTTCTGATGAGAAACCTAACGTTG   |
| BIP1_RirG196040   | 0 | DNA2 | AATAACTATTCCTAATGTAATAGTAATTTCTGATGAGAAACCTAACGTTG   |
| BIP1_RirG196040   | 2 | N6   | AATAACTATTCCTAATGTAATAGTAATTTCTGATGAGAAACCTAACGTTG   |
|                   |   |      |                                                      |
| BIP1_RirG196040   | 1 | DNA1 | GAACAGGTATAAAAAATTAATTGCTAAATATTGTTCTTTTCGAAACTCATAA |
| BIP1_RirG196040   | 3 | N33  | -----                                                |
| RiBIP1_RirG196040 |   |      | GAACAGGTATAAAAAATTAATTGCTAAATATTGTTCTTTTCGAAACTCATAA |
| BIP1_RirG196040   | 0 | DNA2 | GAACAGGTATAAAAAATTAATTGCTAAATATTGTTCTTTTCGAAACTCATAA |
| BIP1_RirG196040   | 2 | N6   | GAACAGGTATAAAAAATTAATTGCTAAATATTGTTCTTTTCGAAACTCATAA |
|                   |   |      |                                                      |
| BIP1_RirG196040   | 1 | DNA1 | ATTTTAATATTATATTTTCATGTATCGTCAGTTATCGGTATAGATTTAGGA  |
| BIP1_RirG196040   | 3 | N33  | -----                                                |
| RiBIP1_RirG196040 |   |      | ATTTTAATATTATATTTTCATGTATCGTCAGTTATCGGTATAGATTTAGGA  |
| BIP1_RirG196040   | 0 | DNA2 | ATTTTAATATTATATTTTCATGTATCGTCAGTTATCGGTATAGATTTAGGA  |
| BIP1_RirG196040   | 2 | N6   | ATTTTAATATTATATTTTCATGTATCGTCAGTTATCGGTATAGATTTAGGA  |
|                   |   |      |                                                      |
| BIP1_RirG196040   | 1 | DNA1 | ACAACCTTATCTTGTTGGAGTATACGTAACGGAAGAGTTGAGATATT      |
| BIP1_RirG196040   | 3 | N33  | -----                                                |
| RiBIP1_RirG196040 |   |      | ACAACCTTATCTTGTTGGAGTATACGTAACGGAAGAGTTGAGATATT      |
| BIP1_RirG196040   | 0 | DNA2 | ACAACCTTATCTTGTTGGAGTATACGTAACGGAAGAGTTGAGATATT      |
| BIP1_RirG196040   | 2 | N6   | ACAACCTTATCTTGTTGGAGTATACGTAACGGAAGAGTTGAGATATT      |
|                   |   |      |                                                      |
| BIP1_RirG196040   | 1 | DNA1 | AACCAATGACCAGGTAACCGTATCACGCCCTTCTTATGTTGCCTTCACTG   |
| BIP1_RirG196040   | 3 | N33  | -----                                                |
| RiBIP1_RirG196040 |   |      | AACCAATGACCAGGTAACCGTATCACGCCCTTCTTATGTTGCCTTCACTG   |
| BIP1_RirG196040   | 0 | DNA2 | AACCAATGACCAGGTAACCGTATCACGCCCTTCTTATGTTGCCTTCACTG   |
| BIP1_RirG196040   | 2 | N6   | AACCAATGACCAGGTAACCGTATCACGCCCTTCTTATGTTGCCTTCACTG   |
|                   |   |      |                                                      |
| BIP1_RirG196040   | 1 | DNA1 | ATGATGAACGTTTAAATTTGGTGATGCGGCAAAGAATCAATATTCAAATAAC |
| BIP1_RirG196040   | 3 | N33  | -----                                                |
| RiBIP1_RirG196040 |   |      | ATGATGAACGTTTAAATTTGGTGATGCGGCAAAGAATCAATATTCAAATAAC |
| BIP1_RirG196040   | 0 | DNA2 | ATGATGAACGTTTAAATTTGGTGATGCGGCAAAGAATCAATATTCAAATAAC |
| BIP1_RirG196040   | 2 | N6   | ATGATGAACGTTTAAATTTGGTGATGCGGCAAAGAATCAATATTCAAATAAC |
|                   |   |      |                                                      |
| BIP1_RirG196040   | 1 | DNA1 | CCCCAGAACACCATTTTTGATTCTAAGCGACTAATTGGTCGTCGTTTTAG   |
| BIP1_RirG196040   | 3 | N33  | -----                                                |
| RiBIP1_RirG196040 |   |      | CCCCAGAACACCATTTTTGATTCTAAGCGACTAATTGGTCGTCGTTTTAG   |
| BIP1_RirG196040   | 0 | DNA2 | CCCCAGAACACCATTTTTGATTCTAAGCGACTAATTGGTCGTCGTTTTAG   |
| BIP1_RirG196040   | 2 | N6   | CCCCAGAACACCATTTTTGATTCTAAGCGACTAATTGGTCGTCGTTTTAG   |
|                   |   |      |                                                      |
| BIP1_RirG196040   | 1 | DNA1 | CGATAAAGAAGTTCAACAAGATATTAAGCACTTTCCATTCAAGGTCATTG   |
| BIP1_RirG196040   | 3 | N33  | -----                                                |
| RiBIP1_RirG196040 |   |      | CGATAAAGAAGTTCAACAAGATATTAAGCACTTTCCATTCAAGGTCATTG   |
| BIP1_RirG196040   | 0 | DNA2 | CGATAAAGAAGTTCAACAAGATATTAAGCACTTTCCATTCAAGGTCATTG   |
| BIP1_RirG196040   | 2 | N6   | CGATAAAGAAGTTCAACAAGATATTAAGCACTTTCCATTCAAGGTCATTG   |
|                   |   |      |                                                      |
| BIP1_RirG196040   | 1 | DNA1 | ACAAAGATGGTAAACCTGTTATTCAAGTTACTGTAAAAGGTGAAGAAAGA   |
| BIP1_RirG196040   | 3 | N33  | -----                                                |
| RiBIP1_RirG196040 |   |      | ACAAAGATGGTAAACCTGTTATTCAAGTTACTGTAAAAGGTGAAGAAAGA   |
| BIP1_RirG196040   | 0 | DNA2 | ACAAAGATGGTAAACCTGTTATTCAAGTTACTGTAAAAGGTGAAGAAAGA   |
| BIP1_RirG196040   | 2 | N6   | ACAAAGATGGTAAACCTGTTATTCAAGTTACTGTAAAAGGTGAAGAAAGA   |
|                   |   |      |                                                      |
| BIP1_RirG196040   | 1 | DNA1 | ATATTTACTCCTGAAGAAATTTCCGGCTATGATTCTTGGTAAAAATGAAAGA |
| BIP1_RirG196040   | 3 | N33  | -----                                                |
| RiBIP1_RirG196040 |   |      | ATATTTACTCCTGAAGAAATTTCCGGCTATGATTCTTGGTAAAAATGAAAGA |
| BIP1_RirG196040   | 0 | DNA2 | ATATTTACTCCTGAAGAAATTTCCGGCTATGATTCTTGGTAAAAATGAAAGA |
| BIP1_RirG196040   | 2 | N6   | ATATTTACTCCTGAAGAAATTTCCGGCTATGATTCTTGGTAAAAATGAAAGA |
|                   |   |      |                                                      |
| BIP1_RirG196040   | 1 | DNA1 | AATTGCCGAATCATATTTAGGCAAGAATGTTACACATGCAGTAGTTACAG   |
| BIP1_RirG196040   | 3 | N33  | -----                                                |
| RiBIP1_RirG196040 |   |      | AATTGCCGAATCATATTTAGGCAAGAATGTTACACATGCAGTAGTTACAG   |
| BIP1_RirG196040   | 0 | DNA2 | AATTGCCGAATCATATTTAGGCAAGAATGTTACACATGCAGTAGTTACAG   |
| BIP1_RirG196040   | 2 | N6   | AATTGCCGAATCATATTTAGGCAAGAATGTTACACATGCAGTAGTTACAG   |
|                   |   |      |                                                      |
| BIP1_RirG196040   | 1 | DNA1 | TCCCAGCTTACTTTAATGACGCTCAAAGACAAGCCACAAAAGATGCTGGC   |
| BIP1_RirG196040   | 3 | N33  | -----                                                |
| RiBIP1_RirG196040 |   |      | TCCCAGCTTACTTTAATGACGCTCAAAGACAAGCCACAAAAGATGCTGGC   |

BIPl\_RirG196040 | 0 | DNA2 TCCCAGCTTACTTTAATGACGCTCAAAGACAAGCCACAAAAGATGTGCGC  
BIPl\_RirG196040 | 2 | N6 TCCCAGCTTACTTTAATGACGCTCAAAGACAAGCCACAAAAGATGTGCGC  
\*\*\*\*\*

BIPl\_RirG196040 | 1 | DNA1 GTAATTGCTGGACTTAATGTCTCCGTATTGTAAATGAACCTACGGCGGC  
BIPl\_RirG196040 | 3 | N33 GTAATTGCTGGACTTAATGTCTCCGTATTGTAAATGAACCTACGGCGGC  
RiBIPl\_RirG196040 GTAATTGCTGGACTTAATGTCTCCGTATTGTAAATGAACCTACGGCGGC  
BIPl\_RirG196040 | 0 | DNA2 GTAATTGCTGGACTTAATGTCTCCGTATTGTAAATGAACCTACGGCGGC  
BIPl\_RirG196040 | 2 | N6 GTAATTGCTGGACTTAATGTCTCCGTATTGTAAATGAACCTACGGCGGC  
\*\*\*\*\*

BIPl\_RirG196040 | 1 | DNA1 TGCAATTGCATATGATCTTGATAAATCCGAGGGGAACGTGAGATTCTTG  
BIPl\_RirG196040 | 3 | N33 TGCAATTGCATATGATCTTGATAAATCCGAGGGGAACGTGAGATTCTTG  
RiBIPl\_RirG196040 TGCAATTGCATATGATCTTGATAAATCCGAGGGGAACGTGAGATTCTTG  
BIPl\_RirG196040 | 0 | DNA2 TGCAATTGCATATGATCTTGATAAATCCGAGGGGAACGTGAGATTCTTG  
BIPl\_RirG196040 | 2 | N6 TGCAATTGCATATGATCTTGATAAATCCGAGGGGAACGTGAGATTCTTG  
\*\*\*\*\*

BIPl\_RirG196040 | 1 | DNA1 TCTATGATCTTGGTGGGGTACTTTTGATGTGTCTCTCTTGTGTCAGTCGAA  
BIPl\_RirG196040 | 3 | N33 TCTATGATCTTGGTGGGGTACTTTTGATGTGTCTCTCTTGTGTCAGTCGAA  
RiBIPl\_RirG196040 TCTATGATCTTGGTGGGGTACTTTTGATGTGTCTCTCTTGTGTCAGTCGAA  
BIPl\_RirG196040 | 0 | DNA2 TCTATGATCTTGGTGGGGTACTTTTGATGTGTCTCTCTTGTGTCAGTCGAA  
BIPl\_RirG196040 | 2 | N6 TCTATGATCTTGGTGGGGTACTTTTGATGTGTCTCTCTTGTGTCAGTCGAA  
\*\*\*\*\*

BIPl\_RirG196040 | 1 | DNA1 GATGATGTTTTTGAGGTATTGGCAACTGCCGGCGATACACATTTGGGAGG  
BIPl\_RirG196040 | 3 | N33 GATGATGTTTTTGAGGTATTGGCAACTGCCGGCGATACACATTTGGGAGG  
RiBIPl\_RirG196040 GATGATGTTTTTGAGGTATTGGCAACTGCCGGCGATACACATTTGGGAGG  
BIPl\_RirG196040 | 0 | DNA2 GATGATGTTTTTGAGGTATTGGCAACTGCCGGCGATACACATTTGGGAGG  
BIPl\_RirG196040 | 2 | N6 GATGATGTTTTTGAGGTATTGGCAACTGCCGGCGATACACATTTGGGAGG  
\*\*\*\*\*

BIPl\_RirG196040 | 1 | DNA1 CGAAGACTTCGACAACCGAGTTATTGACCACTTCGTTAAACTTTATAAAA  
BIPl\_RirG196040 | 3 | N33 CGAAGACTTCGACAACCGAGTTATTGACCACTTCGTTAAACTTTATAAAA  
RiBIPl\_RirG196040 CGAAGACTTCGACAACCGAGTTATTGACCACTTCGTTAAACTTTATAAAA  
BIPl\_RirG196040 | 0 | DNA2 CGAAGACTTCGACAACCGAGTTATTGACCACTTCGTTAAACTTTATAAAA  
BIPl\_RirG196040 | 2 | N6 CGAAGACTTCGACAACCGAGTTATTGACCACTTCGTTAAACTTTATAAAA  
\*\*\*\*\*

BIPl\_RirG196040 | 1 | DNA1 AGAAAAATAAAATAGATGTTACACAAGATCTAAAAGCTATGGGTAAATTA  
BIPl\_RirG196040 | 3 | N33 AGAAAAATAAAATAGATGTTACACAAGATCTAAAAGCTATGGGTAAATTA  
RiBIPl\_RirG196040 AGAAAAATAAAATAGATGTTACACAAGATCTAAAAGCTATGGGTAAATTA  
BIPl\_RirG196040 | 0 | DNA2 AGAAAAATAAAATAGATGTTACACAAGATCTAAAAGCTATGGGTAAATTA  
BIPl\_RirG196040 | 2 | N6 AGAAAAATAAAATAGATGTTACACAAGATCTAAAAGCTATGGGTAAATTA  
\*\*\*\*\*

BIPl\_RirG196040 | 1 | DNA1 AAGCGTGAAGTTGAAAAGGTCAAGCGTACATTATCTTCTCAAATGTCAAC  
BIPl\_RirG196040 | 3 | N33 AAGCGTGAAGTTGAAAAGGTCAAGCGTACATTATCTTCTCAAATGTCAAC  
RiBIPl\_RirG196040 AAGCGTGAAGTTGAAAAGGTCAAGCGTACATTATCTTCTCAAATGTCAAC  
BIPl\_RirG196040 | 0 | DNA2 AAGCGTGAAGTTGAAAAGGTCAAGCGTACATTATCTTCTCAAATGTCAAC  
BIPl\_RirG196040 | 2 | N6 AAGCGTGAAGTTGAAAAGGTCAAGCGTACATTATCTTCTCAAATGTCAAC  
\*\*\*\*\*

BIPl\_RirG196040 | 1 | DNA1 TCGTGTGCGAAATTGAATCATTTTATGATGGTAAAGATTTTTCCGAAACTT  
BIPl\_RirG196040 | 3 | N33 TCGTGTGCGAAATTGAATCATTTTATGATGGTAAAGATTTTTCCGAAACTT  
RiBIPl\_RirG196040 TCGTGTGCGAAATTGAATCATTTTATGATGGTAAAGATTTTTCCGAAACTT  
BIPl\_RirG196040 | 0 | DNA2 TCGTGTGCGAAATTGAATCATTTTATGATGGTAAAGATTTTTCCGAAACTT  
BIPl\_RirG196040 | 2 | N6 TCGTGTGCGAAATTGAATCATTTTATGATGGTAAAGATTTTTCCGAAACTT  
\*\*\*\*\*

BIPl\_RirG196040 | 1 | DNA1 TGACCCGAGCCAAATTTGAAGAGCTTAATAATGATCTCTCCGTAAAAACA  
BIPl\_RirG196040 | 3 | N33 TGACCCGAGCCAAATTTGAAGAGCTTAATAATGATCTCTCCGTAAAAACA  
RiBIPl\_RirG196040 TGACCCGAGCCAAATTTGAAGAGCTTAATAATGATCTCTCCGTAAAAACA  
BIPl\_RirG196040 | 0 | DNA2 TGACCCGAGCCAAATTTGAAGAGCTTAATAATGATCTCTCCGTAAAAACA  
BIPl\_RirG196040 | 2 | N6 TGACCCGAGCCAAATTTGAAGAGCTTAATAATGATCTCTCCGTAAAAACA  
\*\*\*\*\*

BIPl\_RirG196040 | 1 | DNA1 TTAAAGCCCCTTGAACAAGTGTGAAAGATGCAAAATATTGATAAGAAGGA  
BIPl\_RirG196040 | 3 | N33 TTAAAGCCCCTTGAACAAGTGTGAAAGATGCAAAATATTGATAAGAAGGA  
RiBIPl\_RirG196040 TTAAAGCCCCTTGAACAAGTGTGAAAGATGCAAAATATTGATAAGAAGGA  
BIPl\_RirG196040 | 0 | DNA2 TTAAAGCCCCTTGAACAAGTGTGAAAGATGCAAAATATTGATAAGAAGGA  
BIPl\_RirG196040 | 2 | N6 TTAAAGCCCCTTGAACAAGTGTGAAAGATGCAAAATATTGATAAGAAGGA  
\*\*\*\*\*

BIPl\_RirG196040 | 1 | DNA1 TGTACACGATATTGTACTCATTGGTGGTTCCACACGTATTCCTCAAAGTTC  
BIPl\_RirG196040 | 3 | N33 TGTACACGATATTGTACTCATTGGTGGTTCCACACGTATTCCTCAAAGTTC

|                   |          |                                                       |
|-------------------|----------|-------------------------------------------------------|
| RiBIP1_RirG196040 |          | TGTACACGATATTGTACTCATTTGGTGGTTCCACACGTATTCCTCCAAAGTTC |
| BIP1_RirG196040   | 0   DNA2 | TGTACACGATATTGTACTCATTTGGTGGTTCCACACGTATTCCTCCAAAGTTC |
| BIP1_RirG196040   | 2   N6   | TGTACACGATATTGTACTCATTTGGTGGTTCCACACGTATTCCTCCAAAGTTC |
|                   |          | *****                                                 |
| BIP1_RirG196040   | 1   DNA1 | AACAACACTTGAAGAATCTTTAATGGCAAGAAAGCTTCCAAAAATATT      |
| BIP1_RirG196040   | 3   N33  | AACAACACTTGAAGAATCTTTAATGGCAAGAAAGCTTCCAAAAATATT      |
| RiBIP1_RirG196040 |          | AACAACACTTGAAGAATCTTTAATGGCAAGAAAGCTTCCAAAAATATT      |
| BIP1_RirG196040   | 0   DNA2 | AACAACACTTGAAGAATCTTTAATGGCAAGAAAGCTTCCAAAAATATT      |
| BIP1_RirG196040   | 2   N6   | AACAACACTTGAAGAATCTTTAATGGCAAGAAAGCTTCCAAAAATATT      |
|                   |          | *****                                                 |
| BIP1_RirG196040   | 1   DNA1 | AATCCTGATGAAGCGGTTGCGCATGGTGCCGCCATACAAGGAGGTATACT    |
| BIP1_RirG196040   | 3   N33  | AATCCTGATGAAGCGGTTGCGCATGGTGCCGCCATACAAGGAGGTATACT    |
| RiBIP1_RirG196040 |          | AATCCTGATGAAGCGGTTGCGCATGGTGCCGCCATACAAGGAGGTATACT    |
| BIP1_RirG196040   | 0   DNA2 | AATCCTGATGAAGCGGTTGCGCATGGTGCCGCCATACAAGGAGGTATACT    |
| BIP1_RirG196040   | 2   N6   | AATCCTGATGAAGCGGTTGCGCATGGTGCCGCCATACAAGGAGGTATACT    |
|                   |          | *****                                                 |
| BIP1_RirG196040   | 1   DNA1 | TTCCGGAACGCGAAAAAAAACCTTTAATAGACGTTTGTCTCTTACAC       |
| BIP1_RirG196040   | 3   N33  | TTCCGGAACGCGAAAAAAAACCTTTAATAGACGTTTGTCTCTTACAC       |
| RiBIP1_RirG196040 |          | TTCCGGAACGCGAAAAAAAACCTTTAATAGACGTTTGTCTCTTACAC       |
| BIP1_RirG196040   | 0   DNA2 | TTCCGGAACGCGAAAAAAAACCTTTAATAGACGTTTGTCTCTTACAC       |
| BIP1_RirG196040   | 2   N6   | TTCCGGAACGCGAAAAAAAACCTTTAATAGACGTTTGTCTCTTACAC       |
|                   |          | *****                                                 |
| BIP1_RirG196040   | 1   DNA1 | TCGGTATTGAAACAACCTGGTGGCGTTATGACAAAAATTAATCTCTGTAAC   |
| BIP1_RirG196040   | 3   N33  | TCGGTATTGAAACAACCTGGTGGCGTTATGACAAAAATTAATCTCTGTAAC   |
| RiBIP1_RirG196040 |          | TCGGTATTGAAACAACCTGGTGGCGTTATGACAAAAATTAATCTCTGTAAC   |
| BIP1_RirG196040   | 0   DNA2 | TCGGTATTGAAACAACCTGGTGGCGTTATGACAAAAATTAATCTCTGTAAC   |
| BIP1_RirG196040   | 2   N6   | TCGGTATTGAAACAACCTGGTGGCGTTATGACAAAAATTAATCTCTGTAAC   |
|                   |          | *****                                                 |
| BIP1_RirG196040   | 1   DNA1 | ACTGTAATCCCTACTAAGAAGTCACAAATCTTCTCTACCGCCGCGGATAA    |
| BIP1_RirG196040   | 3   N33  | ACTGTAATCCCTACTAAGAAGTCACAAATCTTCTCTACCGCCGCGGATAA    |
| RiBIP1_RirG196040 |          | ACTGTAATCCCTACTAAGAAGTCACAAATCTTCTCTACCGCCGCGGATAA    |
| BIP1_RirG196040   | 0   DNA2 | ACTGTAATCCCTACTAAGAAGTCACAAATCTTCTCTACCGCCGCGGATAA    |
| BIP1_RirG196040   | 2   N6   | ACTGTAATCCCTACTAAGAAGTCACAAATCTTCTCTACCGCCGCGGATAA    |
|                   |          | *****                                                 |
| BIP1_RirG196040   | 1   DNA1 | CCAACCTACTGTATTAATTCAAGTTTACGAAGGAGAACGTTTTATGACTA    |
| BIP1_RirG196040   | 3   N33  | CCAACCTACTGTATTAATTCAAGTTTACGAAGGAGAACGTTTTATGACTA    |
| RiBIP1_RirG196040 |          | CCAACCTACTGTATTAATTCAAGTTTACGAAGGAGAACGTTTTATGACTA    |
| BIP1_RirG196040   | 0   DNA2 | CCAACCTACTGTATTAATTCAAGTTTACGAAGGAGAACGTTTTATGACTA    |
| BIP1_RirG196040   | 2   N6   | CCAACCTACTGTATTAATTCAAGTTTACGAAGGAGAACGTTTTATGACTA    |
|                   |          | *****                                                 |
| BIP1_RirG196040   | 1   DNA1 | AAGAAAACAACCTTGCTCGGCAAGTTCGAATTAACAGGTATACCGCCTGCA   |
| BIP1_RirG196040   | 3   N33  | AAGAAAACAACCTTGCTCGGCAAGTTCGAATTAACAGGTATACCGCCTGCA   |
| RiBIP1_RirG196040 |          | AAGAAAACAACCTTGCTCGGCAAGTTCGAATTAACAGGTATACCGCCTGCA   |
| BIP1_RirG196040   | 0   DNA2 | AAGAAAACAACCTTGCTCGGCAAGTTCGAATTAACAGGTATACCGCCTGCA   |
| BIP1_RirG196040   | 2   N6   | AAGAAAACAACCTTGCTCGGCAAGTTCGAATTAACAGGTATACCGCCTGCA   |
|                   |          | *****                                                 |
| BIP1_RirG196040   | 1   DNA1 | CCACGAGGTATACCACAGATCGAGGTTACATTTGAAATTGATACCAATGG    |
| BIP1_RirG196040   | 3   N33  | CCACGAGGTATACCACAGATCGAGGTTACATTTGAAATTGATACCAATGG    |
| RiBIP1_RirG196040 |          | CCACGAGGTATACCACAGATCGAGGTTACATTTGAAATTGATACCAATGG    |
| BIP1_RirG196040   | 0   DNA2 | CCACGAGGTATACCACAGATCGAGGTTACATTTGAAATTGATACCAATGG    |
| BIP1_RirG196040   | 2   N6   | CCACGAGGTATACCACAGATCGAGGTTACATTTGAAATTGATACCAATGG    |
|                   |          | *****                                                 |
| BIP1_RirG196040   | 1   DNA1 | TATAGTGAAAGTATCTGCAGCAGATAAAAAGTACAGGGAAAACCTGAATCGA  |
| BIP1_RirG196040   | 3   N33  | TATAGTGAAAGTATCTGCAGCAGATAAAAAGTACAGGGAAAACCTGAATCGA  |
| RiBIP1_RirG196040 |          | TATAGTGAAAGTATCTGCAGCAGATAAAAAGTACAGGGAAAACCTGAATCGA  |
| BIP1_RirG196040   | 0   DNA2 | TATAGTGAAAGTATCTGCAGCAGATAAAAAGTACAGGGAAAACCTGAATCGA  |
| BIP1_RirG196040   | 2   N6   | TATAGTGAAAGTATCTGCAGCAGATAAAAAGTACAGGGAAAACCTGAATCGA  |
|                   |          | *****                                                 |
| BIP1_RirG196040   | 1   DNA1 | TCACAATCATAAACGATAAAGGTCGTCTTTCTCAAGAAGAAATTAATCGT    |
| BIP1_RirG196040   | 3   N33  | TCACAATCATAAACGATAAAGGTCGTCTTTCTCAAGAAGAAATTAATCGT    |
| RiBIP1_RirG196040 |          | TCACAATCATAAACGATAAAGGTCGTCTTTCTCAAGAAGAAATTAATCGT    |
| BIP1_RirG196040   | 0   DNA2 | TCACAATCATAAACGATAAAGGTCGTCTTTCTCAAGAAGAAATTAATCGT    |
| BIP1_RirG196040   | 2   N6   | TCACAATCATAAACGATAAAGGTCGTCTTTCTCAAGAAGAAATTAATCGT    |
|                   |          | *****                                                 |

BIP1\_RirG196040 | 1 | DNA1 ATGGTTGAAGAAGCCGAACAATTTGCTGAAGAGGATAAGATTCAAAGGA  
BIP1\_RirG196040 | 3 | N33 ATGGTTGAAGAAGCCGAACAATTTGCTGAAGAGGATAAGATTCAAAGGA  
RiBIP1\_RirG196040 ATGGTTGAAGAAGCCGAACAATTTGCTGAAGAGGATAAGATTCAAAGGA  
BIP1\_RirG196040 | 0 | DNA2 ATGGTTGAAGAAGCCGAACAATTTGCTGAAGAGGATAAGATTCAAAGGA  
BIP1\_RirG196040 | 2 | N6 ATGGTTGAAGAAGCCGAACAATTTGCTGAAGAGGATAAGATTCAAAGGA  
\*\*\*\*\*

BIP1\_RirG196040 | 1 | DNA1 ACGCATAGAAGCTAAACATCAACTTGAAAATTTTGCATACACAATCAAAA  
BIP1\_RirG196040 | 3 | N33 ACGCATAGAAGCTAAACATCAACTTGAAAATTTTGCATACACAATCAAAA  
RiBIP1\_RirG196040 ACGCATAGAAGCTAAACATCAACTTGAAAATTTTGCATACACAATCAAAA  
BIP1\_RirG196040 | 0 | DNA2 ACGCATAGAAGCTAAACATCAACTTGAAAATTTTGCATACACAATCAAAA  
BIP1\_RirG196040 | 2 | N6 ACGCATAGAAGCTAAACATCAACTTGAAAATTTTGCATACACAATCAAAA  
\*\*\*\*\*

BIP1\_RirG196040 | 1 | DNA1 GTCAAATTTTGTGATGACAGAGGACTTGGTAAGAAAATAAGCGATGACGAC  
BIP1\_RirG196040 | 3 | N33 GTCAAATTTTGTGATGACAGAGGACTTGGTAAGAAAATAAGCGATGACGAC  
RiBIP1\_RirG196040 GTCAAATTTTGTGATGACAGAGGACTTGGTAAGAAAATAAGCGATGACGAC  
BIP1\_RirG196040 | 0 | DNA2 GTCAAATTTTGTGATGACAGAGGACTTGGTAAGAAAATAAGCGATGACGAC  
BIP1\_RirG196040 | 2 | N6 GTCAAATTTTGTGATGACAGAGGACTTGGTAAGAAAATAAGCGATGACGAC  
\*\*\*\*\*

BIP1\_RirG196040 | 1 | DNA1 AGGAAAATTATTAAGATTCAATTAAGACGGTTGAAGATTGGTTGAATGA  
BIP1\_RirG196040 | 3 | N33 AGGAAAATTATTAAGATTCAATTAAGAC-----  
RiBIP1\_RirG196040 AGGAAAATTATTAAGATTCAATTAAGACGGTTGAAGATTGGTTGAATGA  
BIP1\_RirG196040 | 0 | DNA2 AGGAAAATTATTAAGATTCAATTAAGACGGTTGAAGATTGGTTGAATGA  
BIP1\_RirG196040 | 2 | N6 AGGAAAATTATTAAGATTCAATTAAGACGGTTGAAGATTGGTTGAATGA  
\*\*\*\*\*

BIP1\_RirG196040 | 1 | DNA1 TCATTCAAATTTCTGCGATCAAGGAAGATTTTGTGAAAAACGGGAAGAAT  
BIP1\_RirG196040 | 3 | N33 TCATTCAAATTTCTGCGATCAAGGAAGATTTTGTGAAAAACGGGAAGAAT  
RiBIP1\_RirG196040 TCATTCAAATTTCTGCGATCAAGGAAGATTTTGTGAAAAACGGGAAGAAT  
BIP1\_RirG196040 | 0 | DNA2 TCATTCAAATTTCTGCGATCAAGGAAGATTTTGTGAAAAACGGGAAGAAT  
BIP1\_RirG196040 | 2 | N6 TCATTCAAATTTCTGCGATCAAGGAAGATTTTGTGAAAAACGGGAAGAAT

BIP1\_RirG196040 | 1 | DNA1 TACAATCTATCGTTAATCCGATAACTACTAAATTGCATGCTGATGGTCAA  
BIP1\_RirG196040 | 3 | N33 TACAATCTATCGTTAATCCGATAACTACTAAATTGCATGCTGATGGTCAA  
RiBIP1\_RirG196040 TACAATCTATCGTTAATCCGATAACTACTAAATTGCATGCTGATGGTCAA  
BIP1\_RirG196040 | 0 | DNA2 TACAATCTATCGTTAATCCGATAACTACTAAATTGCATGCTGATGGTCAA  
BIP1\_RirG196040 | 2 | N6 TACAATCTATCGTTAATCCGATAACTACTAAATTGCATGCTGATGGTCAA

BIP1\_RirG196040 | 1 | DNA1 GCTCCACCACCACCAAGGCATGAAGATTTGTAA  
BIP1\_RirG196040 | 3 | N33 GCTCCACCACCACCAAGGCATGAAGATTTGTAA  
RiBIP1\_RirG196040 GCTCCACCACCACCAAGGCATGAAGATTTGTAA  
BIP1\_RirG196040 | 0 | DNA2 GCTCCACCACCACCAAGGCATGAAGATTTGTAA  
BIP1\_RirG196040 | 2 | N6 GCTCCACCACCACCAAGGCATGAAGATTTGTAA

## BIP2:

BIP2\_RirG160690 ATGAAGAAAGCTACTTTCTTCAAATTTATTGCAGTGTATGTTCACTGTT  
BIP2\_RirG160690 | 0 | DNA1 ATGAAGAAAGCTACTTTCTTCAAATTTATTGCAGTGTATGTTCACTGTT  
BIP2\_RirG160690 | 1 | DNA2 ATGAAGAAAGCTACTTTCTTCAAATTTATTGCAGTGTATGTTCACTGTT  
BIP2\_RirG160690 | 2 | N6 ATGAAGAAAGCTACTTTCTTCAAATTTATTGCAGTGTATGTTCACTGTT  
\*\*\*\*\*

BIP2\_RirG160690 AATAACTATTCCCTATTGTAATAGTAATTGCTGATGAGAAACCCGACGTTG  
BIP2\_RirG160690 | 0 | DNA1 AATAACTATTCCCTATTGTAATAGTAATTGCTGATGAGAAACCCGACGTTG  
BIP2\_RirG160690 | 1 | DNA2 AATAACTATTCCCTATTGTAATAGTAATTGCTGATGAGAAACCCGACGTTG  
BIP2\_RirG160690 | 2 | N6 AATAACTATTCCCTATTGTAATAGTAATTGCTGATGAGAAACCCGACGTTG  
\*\*\*\*\*

BIP2\_RirG160690 GAACAGGTATAAAAATTAATTGTTGAATATTGTTCTCTCGAAACTTATAA  
BIP2\_RirG160690 | 0 | DNA1 GAACAGGTATAAAAATTAATTGTTGAATATTGTTCTCTCGAAACTTATAA  
BIP2\_RirG160690 | 1 | DNA2 GAACAGGTATAAAAATTAATTGTTGAATATTGTTCTCTCGAAACTTATAA  
BIP2\_RirG160690 | 2 | N6 GAACAGGTATAAAAATTAATTGTTGAATATTGTTCTCTCGAAACTTATAA  
\*\*\*\*\*

BIP2\_RirG160690 GTCTAATATTATATTCATGGATCGACAGTTATCGGTATAGATTTAGGAA  
BIP2\_RirG160690 | 0 | DNA1 GTCTAATATTATATTCATGGATCGACAGTTATCGGTATAGATTTAGGAA  
BIP2\_RirG160690 | 1 | DNA2 GTCTAATATTATATTCATGGATCGACAGTTATCGGTATAGATTTAGGAA  
BIP2\_RirG160690 | 2 | N6 GTCTAATATTATATTCATGGATCGACAGTTATCGGTATAGATTTAGGAA  
\*\*\*\*\*

BIP2\_RirG160690 CAACTTATTCTGTGTTGGAGTACACGTAACCGGAAGATTGAGATATTG  
BIP2\_RirG160690 | 0 | DNA1 CAACTTATTCTGTGTTGGAGTACACGTAACCGGAAGATTGAGATATTG

|                 |   |      |                                                     |
|-----------------|---|------|-----------------------------------------------------|
| BIP2_RirG160690 | 1 | DNA2 | CAACTTATTCTTGTGTGGAGTACACGTAACCGGAAGAGTTGAGATATTG   |
| BIP2_RirG160690 | 2 | N6   | CAACTTATTCTTGTGTGGAGTACACGTAACCGGAAGAGTTGAGATATTG   |
| *****           |   |      |                                                     |
| BIP2_RirG160690 |   |      | ACCAATGACCAGGGTAACCGTATCACGCCTTCTTATGTTGCCTTCACCGA  |
| BIP2_RirG160690 | 0 | DNA1 | ACCAATGACCAGGGTAACCGTATCACGCCTTCTTATGTTGCCTTCACCGA  |
| BIP2_RirG160690 | 1 | DNA2 | ACCAATGACCAGGGTAACCGTATCACGCCTTCTTATGTTGCCTTCACCGA  |
| BIP2_RirG160690 | 2 | N6   | ACCAATGACCAGGGTAACCGTATCACGCCTTCTTATGTTGCCTTCACCGA  |
| *****           |   |      |                                                     |
| BIP2_RirG160690 |   |      | TGATGAACGCTAATTGGCGATGCGGCAAAGAATCAATATTCAAATAACC   |
| BIP2_RirG160690 | 0 | DNA1 | TGATGAACGCTAATTGGCGATGCGGCAAAGAATCAATATTCAAATAACC   |
| BIP2_RirG160690 | 1 | DNA2 | TGATGAACGCTAATTGGCGATGCGGCAAAGAATCAATATTCAAATAACC   |
| BIP2_RirG160690 | 2 | N6   | TGATGAACGCTAATTGGCGATGCGGCAAAGAATCAATATTCAAATAACC   |
| *****           |   |      |                                                     |
| BIP2_RirG160690 |   |      | CTAGGAACACTATTTTTGATGCTAAGCGGCTAATTGGTCGTCGCTTTAGC  |
| BIP2_RirG160690 | 0 | DNA1 | CTAGGAACACTATTTTTGATGCTAAGCGGCTAATTGGTCGTCGCTTTAGC  |
| BIP2_RirG160690 | 1 | DNA2 | CTAGGAACACTATTTTTGATGCTAAGCGGCTAATTGGTCGTCGCTTTAGC  |
| BIP2_RirG160690 | 2 | N6   | CTAGGAACACTATTTTTGATGCTAAGCGGCTAATTGGTCGTCGCTTTAGC  |
| *****           |   |      |                                                     |
| BIP2_RirG160690 |   |      | GATAAAGAAGTTCAACAAGATATTAGGCACCTTCCATTCAAGGTCATTGA  |
| BIP2_RirG160690 | 0 | DNA1 | GATAAAGAAGTTCAACAAGATATTAGGCACCTTCCATTCAAGGTCATTGA  |
| BIP2_RirG160690 | 1 | DNA2 | GATAAAGAAGTTCAACAAGATATTAGGCACCTTCCATTCAAGGTCATTGA  |
| BIP2_RirG160690 | 2 | N6   | GATAAAGAAGTTCAACAAGATATTAGGCACCTTCCATTCAAGGTCATTGA  |
| *****           |   |      |                                                     |
| BIP2_RirG160690 |   |      | CAAAGATGGTAAACCTGTTATTCAAGTAACGTAAAAGGCGAAGAAAGAA   |
| BIP2_RirG160690 | 0 | DNA1 | CAAAGATGGTAAACCTGTTATTCAAGTAACGTAAAAGGCGAAGAAAGAA   |
| BIP2_RirG160690 | 1 | DNA2 | CAAAGATGGTAAACCTGTTATTCAAGTAACGTAAAAGGCGAAGAAAGAA   |
| BIP2_RirG160690 | 2 | N6   | CAAAGATGGTAAACCTGTTATTCAAGTAACGTAAAAGGCGAAGAAAGAA   |
| *****           |   |      |                                                     |
| BIP2_RirG160690 |   |      | TATTTACTCCTGAAGAAATTTCCGGCTATGATTCTTGGTAAAATGAAAGAA |
| BIP2_RirG160690 | 0 | DNA1 | TATTTACTCCTGAAGAAATTTCCGGCTATGATTCTTGGTAAAATGAAAGAA |
| BIP2_RirG160690 | 1 | DNA2 | TATTTACTCCTGAAGAAATTTCCGGCTATGATTCTTGGTAAAATGAAAGAA |
| BIP2_RirG160690 | 2 | N6   | TATTTACTCCTGAAGAAATTTCCGGCTATGATTCTTGGTAAAATGAAAGAA |
| *****           |   |      |                                                     |
| BIP2_RirG160690 |   |      | ATTGCAGAATCGTATTTAGGCAAGAAGGTTACACATGCAGTAGTTACAGT  |
| BIP2_RirG160690 | 0 | DNA1 | ATTGCAGAATCGTATTTAGGCAAGAAGGTTACACATGCAGTAGTTACAGT  |
| BIP2_RirG160690 | 1 | DNA2 | ATTGCAGAATCGTATTTAGGCAAGAAGGTTACACATGCAGTAGTTACAGT  |
| BIP2_RirG160690 | 2 | N6   | ATTGCAGAATCGTATTTAGGCAAGAAGGTTACACATGCAGTAGTTACAGT  |
| *****           |   |      |                                                     |
| BIP2_RirG160690 |   |      | CCCAGCTTACTTTAATGACGCTCAAAGACAAGCCACAAAAGATGCTGGCG  |
| BIP2_RirG160690 | 0 | DNA1 | CCCAGCTTACTTTAATGACGCTCAAAGACAAGCCACAAAAGATGCTGGCG  |
| BIP2_RirG160690 | 1 | DNA2 | CCCAGCTTACTTTAATGACGCTCAAAGACAAGCCACAAAAGATGCTGGCG  |
| BIP2_RirG160690 | 2 | N6   | CCCAGCTTACTTTAATGACGCTCAAAGACAAGCCACAAAAGATGCTGGCG  |
| *****           |   |      |                                                     |
| BIP2_RirG160690 |   |      | TAATTGCTGGACTTAATGTCTTCGTATTGTAAATGAACCTACGGCGGCT   |
| BIP2_RirG160690 | 0 | DNA1 | TAATTGCTGGACTTAATGTCTTCGTATTGTAAATGAACCTACGGCGGCT   |
| BIP2_RirG160690 | 1 | DNA2 | TAATTGCTGGACTTAATGTCTTCGTATTGTAAATGAACCTACGGCGGCT   |
| BIP2_RirG160690 | 2 | N6   | TAATTGCTGGACTTAATGTCTTCGTATTGTAAATGAACCTACGGCGGCT   |
| *****           |   |      |                                                     |
| BIP2_RirG160690 |   |      | GCAATTGCATATGGTCTTGATAAATCCGATGGGGAACGTCAGATTCTTGT  |
| BIP2_RirG160690 | 0 | DNA1 | GCAATTGCATATGGTCTTGATAAATCCGATGGGGAACGTCAGATTCTTGT  |
| BIP2_RirG160690 | 1 | DNA2 | GCAATTGCATATGGTCTTGATAAATCCGATGGGGAACGTCAGATTCTTGT  |
| BIP2_RirG160690 | 2 | N6   | GCAATTGCATATGGTCTTGATAAATCCGATGGGGAACGTCAGATTCTTGT  |
| *****           |   |      |                                                     |
| BIP2_RirG160690 |   |      | CTATGATCTTGGTGGTGGTACCTTTGATGTTTCTCTCTTGTCAATTGATG  |
| BIP2_RirG160690 | 0 | DNA1 | CTATGATCTTGGTGGTGGTACCTTTGATGTTTCTCTCTTGTCAATTGATG  |
| BIP2_RirG160690 | 1 | DNA2 | CTATGATCTTGGTGGTGGTACCTTTGATGTTTCTCTCTTGTCAATTGATG  |
| BIP2_RirG160690 | 2 | N6   | CTATGATCTTGGTGGTGGTACCTTTGATGTTTCTCTCTTGTCAATTGATG  |
| *****           |   |      |                                                     |
| BIP2_RirG160690 |   |      | ATGGTGTTTTTGAGGTATTGGCAACTGCCGGCGATACACATTTGGGAGGT  |
| BIP2_RirG160690 | 0 | DNA1 | ATGGTGTTTTTGAGGTATTGGCAACTGCCGGCGATACACATTTGGGAGGT  |
| BIP2_RirG160690 | 1 | DNA2 | ATGGTGTTTTTGAGGTATTGGCAACTGCCGGCGATACACATTTGGGAGGT  |
| BIP2_RirG160690 | 2 | N6   | ATGGTGTTTTTGAGGTATTGGCAACTGCCGGCGATACACATTTGGGAGGT  |
| *****           |   |      |                                                     |

|                 |   |      |                                                      |
|-----------------|---|------|------------------------------------------------------|
| BIP2_RirG160690 |   |      | GAAGACTTCGACAACCGAGTTATTGACCACTTCGTTAAACTTTATAAAAA   |
| BIP2_RirG160690 | 0 | DNA1 | GAAGACTTCGACAACCGAGTTATTGACCACTTCGTTAAACTTTATAAAAA   |
| BIP2_RirG160690 | 1 | DNA2 | GAAGACTTCGACAACCGAGTTATTGACCACTTCGTTAAACTTTATAAAAA   |
| BIP2_RirG160690 | 2 | N6   | GAAGACTTCGACAACCGAGTTATTGACCACTTCGTTAAACTTTATAAAAA   |
|                 |   |      | *****                                                |
| BIP2_RirG160690 |   |      | GAAAAATAAGATAGATGTTACACAAGATTTAAAAGCTATGGGTAAATTA    |
| BIP2_RirG160690 | 0 | DNA1 | GAAAAATAAGATAGATGTTACACAAGATTTAAAAGCTATGGGTAAATTA    |
| BIP2_RirG160690 | 1 | DNA2 | GAAAAATAAGATAGATGTTACACAAGATTTAAAAGCTATGGGTAAATTA    |
| BIP2_RirG160690 | 2 | N6   | GAAAAATAAGATAGATGTTACACAAGATTTAAAAGCTATGGGTAAATTA    |
|                 |   |      | *****                                                |
| BIP2_RirG160690 |   |      | AGCGTGAAGTTGAAAAAGCCAAGCGTACATTATCTTCTCAAATGTCAACT   |
| BIP2_RirG160690 | 0 | DNA1 | AGCGTGAAGTTGAAAAAGCCAAGCGTACATTATCTTCTCAAATGTCAACT   |
| BIP2_RirG160690 | 1 | DNA2 | AGCGTGAAGTTGAAAAAGCCAAGCGTACATTATCTTCTCAAATGTCAACT   |
| BIP2_RirG160690 | 2 | N6   | AGCGTGAAGTTGAAAAAGCCAAGCGTACATTATCTTCTCAAATGTCAACT   |
|                 |   |      | *****                                                |
| BIP2_RirG160690 |   |      | CGTATCGAAATTGAATCATTTTCATGATGGTAAAGATTTTCCGAACTTT    |
| BIP2_RirG160690 | 0 | DNA1 | CGTATCGAAATTGAATCATTTTCATGATGGTAAAGATTTTCCGAACTTT    |
| BIP2_RirG160690 | 1 | DNA2 | CGTATCGAAATTGAATCATTTTCATGATGGTAAAGATTTTCCGAACTTT    |
| BIP2_RirG160690 | 2 | N6   | CGTATCGAAATTGAATCATTTTCATGATGGTAAAGATTTTCCGAACTTT    |
|                 |   |      | *****                                                |
| BIP2_RirG160690 |   |      | GACCCGTGCCAAATTTGAAGAACTTAATAATGATCTCTCCGTA AACAT    |
| BIP2_RirG160690 | 0 | DNA1 | GACCCGTGCCAAATTTGAAGAACTTAATAATGATCTCTCCGTA AACAT    |
| BIP2_RirG160690 | 1 | DNA2 | GACCCGTGCCAAATTTGAAGAACTTAATAATGATCTCTCCGTA AACAT    |
| BIP2_RirG160690 | 2 | N6   | GACCCGTGCCAAATTTGAAGAACTTAATAATGATCTCTCCGTA AACAT    |
|                 |   |      | *****                                                |
| BIP2_RirG160690 |   |      | TAAAGCCCGTTGAACAAGTATTGAAAGATGCAAATATTGATAAGAAGGAT   |
| BIP2_RirG160690 | 0 | DNA1 | TAAAGCCCGTTGAACAAGTATTGAAAGATGCAAATATTGATAAGAAGGAT   |
| BIP2_RirG160690 | 1 | DNA2 | TAAAGCCCGTTGAACAAGTATTGAAAGATGCAAATATTGATAAGAAGGAT   |
| BIP2_RirG160690 | 2 | N6   | TAAAGCCCGTTGAACAAGTATTGAAAGATGCAAATATTGATAAGAAGGAT   |
|                 |   |      | *****                                                |
| BIP2_RirG160690 |   |      | GTACACGATATTGTACTAGTTGGTGGTTCCACACGTATTCCCAAAGTTCA   |
| BIP2_RirG160690 | 0 | DNA1 | GTACACGATATTGTACTAGTTGGTGGTTCCACACGTATTCCCAAAGTTCA   |
| BIP2_RirG160690 | 1 | DNA2 | GTACACGATATTGTACTAGTTGGTGGTTCCACACGTATTCCCAAAGTTCA   |
| BIP2_RirG160690 | 2 | N6   | GTACACGATATTGTACTAGTTGGTGGTTCCACACGTATTCCCAAAGTTCA   |
|                 |   |      | *****                                                |
| BIP2_RirG160690 |   |      | ACAACCTCCTTGAAGAATTCCTTTAATGGCAAGAAAGCTTCCAAAAACATTA |
| BIP2_RirG160690 | 0 | DNA1 | ACAACCTCCTTGAAGAATTCCTTTAATGGCAAGAAAGCTTCCAAAAACATTA |
| BIP2_RirG160690 | 1 | DNA2 | ACAACCTCCTTGAAGAATTCCTTTAATGGCAAGAAAGCTTCCAAAAACATTA |
| BIP2_RirG160690 | 2 | N6   | ACAACCTCCTTGAAGAATTCCTTTAATGGCAAGAAAGCTTCCAAAAACATTA |
|                 |   |      | *****                                                |
| BIP2_RirG160690 |   |      | ATCCTGATGAAGCAGTTGCATATGGTGCCGCCATACAAGGAGGTATTCTT   |
| BIP2_RirG160690 | 0 | DNA1 | ATCCTGATGAAGCAGTTGCATATGGTGCCGCCATACAAGGAGGTATTCTT   |
| BIP2_RirG160690 | 1 | DNA2 | ATCCTGATGAAGCAGTTGCATATGGTGCCGCCATACAAGGAGGTATTCTT   |
| BIP2_RirG160690 | 2 | N6   | ATCCTGATGAAGCAGTTGCATATGGTGCCGCCATACAAGGAGGTATTCTT   |
|                 |   |      | *****                                                |
| BIP2_RirG160690 |   |      | TCTGGAGATGAAGATGTAAGGAAATCCTTTTGGTAGACGTTTGTCTCT     |
| BIP2_RirG160690 | 0 | DNA1 | TCTGGAGATGAAGATGTAAGGAAATCCTTTTGGTAGACGTTTGTCTCT     |
| BIP2_RirG160690 | 1 | DNA2 | TCTGGAGATGAAGATGTAAGGAAATCCTTTTGGTAGACGTTTGTCTCT     |
| BIP2_RirG160690 | 2 | N6   | TCTGGAGATGAAGATGTAAGGAAATCCTTTTGGTAGACGTTTGTCTCT     |
|                 |   |      | *****                                                |
| BIP2_RirG160690 |   |      | TACACTCGGTATTGAAACAACCTGGTGGCGTTATGACAAAATTAATTCCTC  |
| BIP2_RirG160690 | 0 | DNA1 | TACACTCGGTATTGAAACAACCTGGTGGCGTTATGACAAAATTAATTCCTC  |
| BIP2_RirG160690 | 1 | DNA2 | TACACTCGGTATTGAAACAACCTGGTGGCGTTATGACAAAATTAATTCCTC  |
| BIP2_RirG160690 | 2 | N6   | TACACTCGGTATTGAAACAACCTGGTGGCGTTATGACAAAATTAATTCCTC  |
|                 |   |      | *****                                                |
| BIP2_RirG160690 |   |      | GTAACACTGTAATTCCTACTAAGAAGTCACAAAATTTCTCTACCGCCGCG   |
| BIP2_RirG160690 | 0 | DNA1 | GTAACACTGTAATTCCTACTAAGAAGTCACAAAATTTCTCTACCGCCGCG   |
| BIP2_RirG160690 | 1 | DNA2 | GTAACACTGTAATTCCTACTAAGAAGTCACAAAATTTCTCTACCGCCGCG   |
| BIP2_RirG160690 | 2 | N6   | GTAACACTGTAATTCCTACTAAGAAGTCACAAAATTTCTCTACCGCCGCG   |
|                 |   |      | *****                                                |
| BIP2_RirG160690 |   |      | GATAACCAACCTACTGTATTAATCAAGTTTACGAAGGAGAACGTTCTAT    |
| BIP2_RirG160690 | 0 | DNA1 | GATAACCAACCTACTGTATTAATCAAGTTTACGAAGGAGAACGTTCTAT    |
| BIP2_RirG160690 | 1 | DNA2 | GATAACCAACCTACTGTATTAATCAAGTTTACGAAGGAGAACGTTCTAT    |
| BIP2_RirG160690 | 2 | N6   | GATAACCAACCTACTGTATTAATCAAGTTTACGAAGGAGAACGTTCTAT    |
|                 |   |      | *****                                                |

|                 |   |      |                                                     |
|-----------------|---|------|-----------------------------------------------------|
| BIP2_RirG160690 |   |      | GACTAAAGATAACAACCTTGCTCGGCAAGTTCGAATTAACAGGTATACCGC |
| BIP2_RirG160690 | 0 | DNA1 | GACTAAAGATAACAACCTTGCTCGGCAAGTTCGAATTAACAGGTATACCGC |
| BIP2_RirG160690 | 1 | DNA2 | GACTAAAGATAACAACCTTGCTCGGCAAGTTCGAATTAACAGGTATACCGC |
| BIP2_RirG160690 | 2 | N6   | GACTAAAGATAACAACCTTGCTCGGCAAGTTCGAATTAACAGGTATACCGC |
|                 |   |      | *****                                               |
| BIP2_RirG160690 |   |      | CTGCACCACGAGGTATACCGCAGATCGAGGTCACATTTGAAATTGATACC  |
| BIP2_RirG160690 | 0 | DNA1 | CTGCACCACGAGGTATACCGCAGATCGAGGTCACATTTGAAATTGATACC  |
| BIP2_RirG160690 | 1 | DNA2 | CTGCACCACGAGGTATACCGCAGATCGAGGTCACATTTGAAATTGATACC  |
| BIP2_RirG160690 | 2 | N6   | CTGCACCACGAGGTATACCGCAGATCGAGGTCACATTTGAAATTGATACC  |
|                 |   |      | *****                                               |
| BIP2_RirG160690 |   |      | AATGGTATAATGAAAGTATCTGCAGCAGATAAAGGTACAGGGAAAACCTGA |
| BIP2_RirG160690 | 0 | DNA1 | AATGGTATAATGAAAGTATCTGCAGCAGATAAAGGTACAGGGAAAACCTGA |
| BIP2_RirG160690 | 1 | DNA2 | AATGGTATAATGAAAGTATCTGCAGCAGATAAAGGTACAGGGAAAACCTGA |
| BIP2_RirG160690 | 2 | N6   | AATGGTATAATGAAAGTATCTGCAGCAGATAAAGGTACAGGGAAAACCTGA |
|                 |   |      | *****                                               |
| BIP2_RirG160690 |   |      | ATCGATTACAATTACAACGATAAAGGTCGTCTTTCTAAAGAAGAAATTG   |
| BIP2_RirG160690 | 0 | DNA1 | ATCGATTACAATTACAACGATAAAGGTCGTCTTTCTAAAGAAGAAATTG   |
| BIP2_RirG160690 | 1 | DNA2 | ATCGATTACAATTACAACGATAAAGGTCGTCTTTCTAAAGAAGAAATTG   |
| BIP2_RirG160690 | 2 | N6   | ATCGATTACAATTACAACGATAAAGGTCGTCTTTCTAAAGAAGAAATTG   |
|                 |   |      | *****                                               |
| BIP2_RirG160690 |   |      | ATCGTATGGTTGAAGAAGCCGAACAATTTGCTGAAGATGATAAGTTTCAA  |
| BIP2_RirG160690 | 0 | DNA1 | ATCGTATGGTTGAAGAAGCCGAACAATTTGCTGAAGATGATAAGTTTCAA  |
| BIP2_RirG160690 | 1 | DNA2 | ATCGTATGGTTGAAGAAGCCGAACAATTTGCTGAAGATGATAAGTTTCAA  |
| BIP2_RirG160690 | 2 | N6   | ATCGTATGGTTGAAGAAGCCGAACAATTTGCTGAAGATGATAAGTTTCAA  |
|                 |   |      | *****                                               |
| BIP2_RirG160690 |   |      | AAGGAACGCGTAGAATCCAGAAATCAGCTTGAAAATTTTGCATACACAAT  |
| BIP2_RirG160690 | 0 | DNA1 | AAGGAACGCGTAGAATCCAGAAATCAGCTTGAAAATTTTGCATACACAAT  |
| BIP2_RirG160690 | 1 | DNA2 | AAGGAACGCGTAGAATCCAGAAATCAGCTTGAAAATTTTGCATACACAAT  |
| BIP2_RirG160690 | 2 | N6   | AAGGAACGCGTAGAATCCAGAAATCAGCTTGAAAATTTTGCATACACAAT  |
|                 |   |      | *****                                               |
| BIP2_RirG160690 |   |      | CAAAAGTCAAATTTCTGATGACGGAGAACTTGGTAAGAAAATAAGCGATG  |
| BIP2_RirG160690 | 0 | DNA1 | CAAAAGTCAAATTTCTGATGACGGAGAACTTGGTAAGAAAATAAGCGATG  |
| BIP2_RirG160690 | 1 | DNA2 | CAAAAGTCAAATTTCTGATGACGGAGAACTTGGTAAGAAAATAAGCGATG  |
| BIP2_RirG160690 | 2 | N6   | CAAAAGTCAAATTTCTGATGACGGAGAACTTGGTAAGAAAATAAGCGATG  |
|                 |   |      | *****                                               |
| BIP2_RirG160690 |   |      | ACGACAAGAAAACCTATTAAGATGCAATCAAGACGGTTGAAGATTGGTTG  |
| BIP2_RirG160690 | 0 | DNA1 | ACGACAAGAAAACCTATTAAGATGCAATCAAGACGGTTGAAGATTGGTTG  |
| BIP2_RirG160690 | 1 | DNA2 | ACGACAAGAAAACCTATTAAGATGCAATCAAGACGGTTGAAGATTGGTTG  |
| BIP2_RirG160690 | 2 | N6   | ACGACAAGAAAACCTATTAAGATGCAATCAAGACGGTTGAAGATTGGTTG  |
|                 |   |      | *****                                               |
| BIP2_RirG160690 |   |      | AATGACCATTCAATTTCTGCGACCAAGGAAGATTTTGATGAAAACCGGGA  |
| BIP2_RirG160690 | 0 | DNA1 | AATGACCATTCAATTTCTGCGACCAAGGAAGATTTTGATGAAAACCGGGA  |
| BIP2_RirG160690 | 1 | DNA2 | AATGACCATTCAATTTCTGCGACCAAGGAAGATTTTGATGAAAACCGGGA  |
| BIP2_RirG160690 | 2 | N6   | AATGACCATTCAATTTCTGCGACCAAGGAAGATTTTGATGAAAACCGGGA  |
|                 |   |      | *****                                               |
| BIP2_RirG160690 |   |      | AGAATTACAATCAATCGTTAATCCAATAACTACTAAATTGTATGCTGATG  |
| BIP2_RirG160690 | 0 | DNA1 | AGAATTACAATCAATCGTTAATCCAATAACTACTAAATTGTATGCTGATG  |
| BIP2_RirG160690 | 1 | DNA2 | AGAATTACAATCAATCGTTAATCCAATAACTACTAAATTGTATGCTGATG  |
| BIP2_RirG160690 | 2 | N6   | AGAATTACAATCAATCGTTAATCCAATAACTACTAAATTGTATGCTGATG  |
|                 |   |      | *****                                               |
| BIP2_RirG160690 |   |      | GTCAAGCTCCACCTTCACACGAGGAACCACCAAGGCATGAAGATTTGTAA  |
| BIP2_RirG160690 | 0 | DNA1 | GTCAAGCTCCACCTTCACACGAGGAACCACCAAGGCATGAAGATTTGTAA  |
| BIP2_RirG160690 | 1 | DNA2 | GTCAAGCTCCACCTTCACACGAGGAACCACCAAGGCATGAAGATTTGTAA  |
| BIP2_RirG160690 | 2 | N6   | GTCAAGCTCCACCTTCACACGAGGAACCACCAAGGCATGAAGATTTGTAA  |
|                 |   |      | *****                                               |

**BIP3:**

|                 |   |      |                                                     |
|-----------------|---|------|-----------------------------------------------------|
| BIP3_RirG043980 |   |      | ATGAAGAAAGCTACTTTCTTTAAATTTATTGCATTGTTATGTTCACTGTT  |
| BIP3_RirG043980 | 0 | DNA2 | ATGAAGAAAGCTACTTTCTTTAAATTTATTGCATTGTTATGTTCACTGTT  |
| BIP3_RirG043980 | 1 | DNA1 | ATGAAGAAAGCTACTTTCTTTAAATTTATTGCATTGTTATGTTCACTGTT  |
| BIP3_RirG043980 | 2 | N33  | ATGAAGAAAGCTACTTTCTTTAAATTTATTGCATTGTTATGTTCACTGTT  |
| BIP3_RirG043980 | 3 | N31  | ATGAAGAAAGCTACTTTCTTTAAATTTATTGCATTGTTATGTTCACTGTT  |
| BIP3_RirG043980 | 5 | N36  | -----                                               |
| BIP3_RirG043980 | 4 | N6   | ATGAAGAAAGCTACTTTCTTTAAATTTATTGCATTGTTATGTTCACTGTT  |
|                 |   |      |                                                     |
| BIP3_RirG043980 |   |      | AATAACTATTCTTATTGCAAAAAGTTATTGTAATTGATGAATCTGACGTTG |
| BIP3_RirG043980 | 0 | DNA2 | AATAACTATTCTTATTGCAAAAAGTTATTGTAATTGATGAATCTGACGTTG |
| BIP3_RirG043980 | 1 | DNA1 | AATAACTATTCTTATTGCAAAAAGTTATTGTAATTGATGAATCTGACGTTG |
| BIP3_RirG043980 | 2 | N33  | AATAACTATTCTTATTGCAAAAAGTTATTGTAATTGATGAATCTGACGTTG |
| BIP3_RirG043980 | 3 | N31  | AATAACTATTCTTATTGCAAAAAGTTATTGTAATTGATGAATCTGACGTTG |
| BIP3_RirG043980 | 5 | N36  | -----                                               |
| BIP3_RirG043980 | 4 | N6   | AATAACTATTCTTATTGCAAAAAGTTATTGTAATTGATGAATCTGACGTTG |
|                 |   |      |                                                     |
| BIP3_RirG043980 |   |      | GAACAGGTATAAAAATTAATTGCTGAATATTGTTCTTTTGAAACTTATAAG |
| BIP3_RirG043980 | 0 | DNA2 | GAACAGGTATAAAAATTAATTGCTGAATATTGTTCTTTTGAAACTTATAAG |
| BIP3_RirG043980 | 1 | DNA1 | GAACAGGTATAAAAATTAATTGCTGAATATTGTTCTTTTGAAACTTATAAG |
| BIP3_RirG043980 | 2 | N33  | GAACAGGTATAAAAATTAATTGCTGAATATTGTTCTTTTGAAACTTATAAG |
| BIP3_RirG043980 | 3 | N31  | GAACAGGTATAAAAATTAATTGCTGAATATTGTTCTTTTGAAACTTATAAG |
| BIP3_RirG043980 | 5 | N36  | -----                                               |
| BIP3_RirG043980 | 4 | N6   | GAACAGGTATAAAAATTAATTGCTGAATATTGTTCTTTTGAAACTTATAAG |
|                 |   |      |                                                     |
| BIP3_RirG043980 |   |      | TTCTAATATTATATCGTCAGTTATCGGTATAGATTTAGGAACAACCTTATT |
| BIP3_RirG043980 | 0 | DNA2 | TTCTAATATTATATCGTCAGTTATCGGTATAGATTTAGGAACAACCTTATT |
| BIP3_RirG043980 | 1 | DNA1 | TTCTAATATTATATCGTCAGTTATCGGTATAGATTTAGGAACAACCTTATT |
| BIP3_RirG043980 | 2 | N33  | TTCTAATATTATATCGTCAGTTATCGGTATAGATTTAGGAACAACCTTATT |
| BIP3_RirG043980 | 3 | N31  | TTCTAATATTATATCGTCAGTTATCGGTATAGATTTAGGAACAACCTTATT |
| BIP3_RirG043980 | 5 | N36  | -----                                               |
| BIP3_RirG043980 | 4 | N6   | TTCTAATATTATATCGTCAGTTATCGGTATAGATTTAGGAACAACCTTATT |
|                 |   |      |                                                     |
| BIP3_RirG043980 |   |      | CTTGTGTTGGAGTATACGTGAACGGAAGAGTTGAGATATTGACCAATGAT  |
| BIP3_RirG043980 | 0 | DNA2 | CTTGTGTTGGAGTATACGTGAACGGAAGAGTTGAGATATTGACCAATGAT  |
| BIP3_RirG043980 | 1 | DNA1 | CTTGTGTTGGAGTATACGTGAACGGAAGAGTTGAGATATTGACCAATGAT  |
| BIP3_RirG043980 | 2 | N33  | CTTGTGTTGGAGTATACGTGAACGGAAGAGTTGAGATATTGACCAATGAT  |
| BIP3_RirG043980 | 3 | N31  | CTTGTGTTGGAGTATACGTGAACGGAAGAGTTGAGATATTGACCAATGAT  |
| BIP3_RirG043980 | 5 | N36  | -----                                               |
| BIP3_RirG043980 | 4 | N6   | CTTGTGTTGGAGTATACGTGAACGGAAGAGTTGAGATATTGACCAATGAT  |
|                 |   |      |                                                     |
| BIP3_RirG043980 |   |      | CAGGTAACCGTATCACGCCTTCTTATGTTGCCTTCACCGATGATGAACG   |
| BIP3_RirG043980 | 0 | DNA2 | CAGGTAACCGTATCACGCCTTCTTATGTTGCCTTCACCGATGATGAACG   |
| BIP3_RirG043980 | 1 | DNA1 | CAGGTAACCGTATCACGCCTTCTTATGTTGCCTTCACCGATGATGAACG   |
| BIP3_RirG043980 | 2 | N33  | CAGGTAACCGTATCACGCCTTCTTATGTTGCCTTCACCGATGATGAACG   |
| BIP3_RirG043980 | 3 | N31  | CAGGTAACCGTATCACGCCTTCTTATGTTGCCTTCACCGATGATGAACG   |
| BIP3_RirG043980 | 5 | N36  | -----                                               |
| BIP3_RirG043980 | 4 | N6   | CAGGTAACCGTATCACGCCTTCTTATGTTGCCTTCACCGATGATGAACG   |
|                 |   |      |                                                     |
| BIP3_RirG043980 |   |      | TTTAATTGGCGATGCGGCAAAGAATCAATATTCAAATAACTCTAAGAACA  |
| BIP3_RirG043980 | 0 | DNA2 | TTTAATTGGCGATGCGGCAAAGAATCAATATTCAAATAACTCTAAGAACA  |
| BIP3_RirG043980 | 1 | DNA1 | TTTAATTGGCGATGCGGCAAAGAATCAATATTCAAATAACTCTAAGAACA  |
| BIP3_RirG043980 | 2 | N33  | TTTAATTGGCGATGCGGCAAAGAATCAATATTCAAATAACTCTAAGAACA  |
| BIP3_RirG043980 | 3 | N31  | TTTAATTGGCGATGCGGCAAAGAATCAATATTCAAATAACTCTAAGAACA  |
| BIP3_RirG043980 | 5 | N36  | -----                                               |
| BIP3_RirG043980 | 4 | N6   | TTTAATTGGCGATGCGGCAAAGAATCAATATTCAAATAACTCTAAGAACA  |
|                 |   |      |                                                     |
| BIP3_RirG043980 |   |      | CCATTTTGGTTTTAAGCGACTAATTGGTCGTCGCTTTAGCGATAAAGAG   |
| BIP3_RirG043980 | 0 | DNA2 | CCATTTTGGTTTTAAGCGACTAATTGGTCGTCGCTTTAGCGATAAAGAG   |
| BIP3_RirG043980 | 1 | DNA1 | CCATTTTGGTTTTAAGCGACTAATTGGTCGTCGCTTTAGCGATAAAGAG   |
| BIP3_RirG043980 | 2 | N33  | CCATTTTGGTTTTAAGCGACTAATTGGTCGTCGCTTTAGCGATAAAGAG   |
| BIP3_RirG043980 | 3 | N31  | CCATTTTGGTTTTAAGCGACTAATTGGTCGTCGCTTTAGCGATAAAGAG   |
| BIP3_RirG043980 | 5 | N36  | -----                                               |
| BIP3_RirG043980 | 4 | N6   | CCATTTTGGTTTTAAGCGACTAATTGGTCGTCGCTTTAGCGATAAAGAG   |
|                 |   |      |                                                     |
| BIP3_RirG043980 |   |      | GTTCAACAAGATATTAAGCAGTTTCCATTCAAGGTCATTGACAAAGATGG  |
| BIP3_RirG043980 | 0 | DNA2 | GTTCAACAAGATATTAAGCAGTTTCCATTCAAGGTCATTGACAAAGATGG  |
| BIP3_RirG043980 | 1 | DNA1 | GTTCAACAAGATATTAAGCAGTTTCCATTCAAGGTCATTGACAAAGATGG  |
| BIP3_RirG043980 | 2 | N33  | GTTCAACAAGATATTAAGCAGTTTCCATTCAAGGTCATTGACAAAGATGG  |
| BIP3_RirG043980 | 3 | N31  | GTTCAACAAGATATTAAGCAGTTTCCATTCAAGGTCATTGACAAAGATGG  |
| BIP3_RirG043980 | 5 | N36  | -----                                               |
| BIP3_RirG043980 | 4 | N6   | GTTCAACAAGATATTAAGCAGTTTCCATTCAAGGTCATTGACAAAGATGG  |
|                 |   |      |                                                     |
| BIP3_RirG043980 |   |      | TAAACCTGTTATTCAAATCACTGTAAAAAGCGAAGAAAGAATTTTACTC   |
| BIP3_RirG043980 | 0 | DNA2 | TAAACCTGTTATTCAAATCACTGTAAAAAGCGAAGAAAGAATTTTACTC   |
| BIP3_RirG043980 | 1 | DNA1 | TAAACCTGTTATTCAAATCACTGTAAAAAGCGAAGAAAGAATTTTACTC   |



BIP3\_RirG043980 | 2 | N33 TAAACCTGTTATTCAAATCACTGTAAAAAGCGAAGAAAGAATATTTACTC  
BIP3\_RirG043980 | 3 | N31 TAAACCTGTTATTCAAATCACTGTAAAAAGCGAAGAAAGAATATTTACTC  
BIP3\_RirG043980 | 5 | N36 -----  
BIP3\_RirG043980 | 4 | N6 TAAACCTGTTATTCAAATCACTGTAAAAAGCGAAGAAAGAATATTTACTC

BIP3\_RirG043980 CTGAAGAAATTTTCGGCTATGATTCTTGGTAAAAATGAAAGAAATTCGAAAA  
BIP3\_RirG043980 | 0 | DNA2 CTGAAGAAATTTTCGGCTATGATTCTTGGTAAAAATGAAAGAAATTCGAAAA  
BIP3\_RirG043980 | 1 | DNA1 CTGAAGAAATTTTCGGCTATGATTCTTGGTAAAAATGAAAGAAATTCGAAAA  
BIP3\_RirG043980 | 2 | N33 CTGAAGAAATTTTCGGCTATGATTCTTGGTAAAAATGAAAGAAATTCGAAAA  
BIP3\_RirG043980 | 3 | N31 CTGAAGAAATTTTCGGCTATGATTCTTGGTAAAAATGAAAGAAATTCGAAAA  
BIP3\_RirG043980 | 5 | N36 -----  
BIP3\_RirG043980 | 4 | N6 CTGAAGAAATTTTCGGCTATGATTCTTGGTAAAAATGAAAGAAATTCGAAAA

BIP3\_RirG043980 TCGTATTTAGGCAAGAAAGTTACACATGCAGTAGTTACAGTCCCAGCTTA  
BIP3\_RirG043980 | 0 | DNA2 TCGTATTTAGGCAAGAAAGTTACACATGCAGTAGTTACAGTCCCAGCTTA  
BIP3\_RirG043980 | 1 | DNA1 TCGTATTTAGGCAAGAAAGTTACACATGCAGTAGTTACAGTCCCAGCTTA  
BIP3\_RirG043980 | 2 | N33 TCGTATTTAGGCAAGAAAGTTACACATGCAGTAGTTACAGTCCCAGCTTA  
BIP3\_RirG043980 | 3 | N31 TCGTATTTAGGCAAGAAAGTTACACATGCAGTAGTTACAGTCCCAGCTTA  
BIP3\_RirG043980 | 5 | N36 -----CAAGAAAGTTACACATGCAGTAGTTACAGTCCCAGCTTA  
BIP3\_RirG043980 | 4 | N6 TCGTATTTAGGCAAGAAAGTTACACATGCAGTAGTTACAGTCCCAGCTTA  
\*\*\*\*\*

BIP3\_RirG043980 CTTTAAATGACGCTCAAAGACAAGCCACAAAAATATGCTGGCGTAATTGCTG  
BIP3\_RirG043980 | 0 | DNA2 CTTTAAATGACGCTCAAAGACAAGCCACAAAAATATGCTGGCGTAATTGCTG  
BIP3\_RirG043980 | 1 | DNA1 CTTTAAATGACGCTCAAAGACAAGCCACAAAAATATGCTGGCGTAATTGCTG  
BIP3\_RirG043980 | 2 | N33 CTTTAAATGACGCTCAAAGACAAGCCACAAAAATATGCTGGCGTAATTGCTG  
BIP3\_RirG043980 | 3 | N31 CTTTAAATGACGCTCAAAGACAAGCCACAAAAATATGCTGGCGTAATTGCTG  
BIP3\_RirG043980 | 5 | N36 CTTTAAATGACGCTCAAAGACAAGCCACAAAAATATGCTGGCGTAATTGCTG  
BIP3\_RirG043980 | 4 | N6 CTTTAAATGACGCTCAAAGACAAGCCACAAAAATATGCTGGCGTAATTGCTG  
\*\*\*\*\*

BIP3\_RirG043980 GACTTAATGTCCTTCGTATTGTAATGAACCTACGGAGGCTGCAATTGCA  
BIP3\_RirG043980 | 0 | DNA2 GACTTAATGTCCTTCGTATTGTAATGAACCTACGGAGGCTGCAATTGCA  
BIP3\_RirG043980 | 1 | DNA1 GACTTAATGTCCTTCGTATTGTAATGAACCTACGGAGGCTGCAATTGCA  
BIP3\_RirG043980 | 2 | N33 GACTTAATGTCCTTCGTATTGTAATGAACCTACGGAGGCTGCAATTGCA  
BIP3\_RirG043980 | 3 | N31 GACTTAATGTCCTTCGTATTGTAATGAACCTACGGAGGCTGCAATTGCA  
BIP3\_RirG043980 | 5 | N36 GACTTAATGTCCTTCGTATTGTAATGAACCTACGGAGGCTGCAATTGCA  
BIP3\_RirG043980 | 4 | N6 GACTTAATGTCCTTCGTATTGTAATGAACCTACGGAGGCTGCAATTGCA  
\*\*\*\*\*

BIP3\_RirG043980 TATGATCTTTATAAATCCGATGGGGAACGTCAGATTCTTGCTCTATGATCT  
BIP3\_RirG043980 | 0 | DNA2 TATGATCTTTATAAATCCGATGGGGAACGTCAGATTCTTGCTCTATGATCT  
BIP3\_RirG043980 | 1 | DNA1 TATGATCTTTATAAATCCGATGGGGAACGTCAGATTCTTGCTCTATGATCT  
BIP3\_RirG043980 | 2 | N33 TATGATCTTTATAAATCCGATGGGGAACGTCAGATTCTTGCTCTATGATCT  
BIP3\_RirG043980 | 3 | N31 TATGATCTTTATAAATCCGATGGGGAACGTCAGATTCTTGCTCTATGATCT  
BIP3\_RirG043980 | 5 | N36 TATGATCTTTATAAATCCGATGGGGAACGTCAGATTCTTGCTCTATGATCT  
BIP3\_RirG043980 | 4 | N6 TATGATCTTTATAAATCCGATGGGGAACGTCAGATTCTTGCTCTATGATCT  
\*\*\*\*\*

BIP3\_RirG043980 TGGTGGTGGTACCTTTGATGTTTCTCTCTTGTCAATCGATGATGGTGT  
BIP3\_RirG043980 | 0 | DNA2 TGGTGGTGGTACCTTTGATGTTTCTCTCTTGTCAATCGATGATGGTGT  
BIP3\_RirG043980 | 1 | DNA1 TGGTGGTGGTACCTTTGATGTTTCTCTCTTGTCAATCGATGATGGTGT  
BIP3\_RirG043980 | 2 | N33 TGGTGGTGGTACCTTTGATGTTTCTCTCTTGTCAATCGATGATGGTGT  
BIP3\_RirG043980 | 3 | N31 TGGTGGTGGTACCTTTGATGTTTCTCTCTTGTCAATCGATGATGGTGT  
BIP3\_RirG043980 | 5 | N36 TGGTGGTGGTACCTTTGATGTTTCTCTCTTGTCAATCGATGATGGTGT  
BIP3\_RirG043980 | 4 | N6 TGGTGGTGGTACCTTTGATGTTTCTCTCTTGTCAATCGATGATGGTGT  
\*\*\*\*\*

BIP3\_RirG043980 TTGAAGTATTGGCAACTGCCGGCGATACACATTTGGGAGGTGAAGACTTC  
BIP3\_RirG043980 | 0 | DNA2 TTGAAGTATTGGCAACTGCCGGCGATACACATTTGGGAGGTGAAGACTTC  
BIP3\_RirG043980 | 1 | DNA1 TTGAAGTATTGGCAACTGCCGGCGATACACATTTGGGAGGTGAAGACTTC  
BIP3\_RirG043980 | 2 | N33 TTGAAGTATTGGCAACTGCCGGCGATACACATTTGGGAGGTGAAGACTTC  
BIP3\_RirG043980 | 3 | N31 TTGAAGTATTGGCAACTGCCGGCGATACACATTTGGGAGGTGAAGACTTC  
BIP3\_RirG043980 | 5 | N36 TTGAAGTATTGGCAACTGCCGGCGATACACATTTGGGAGGTGAAGACTTC  
BIP3\_RirG043980 | 4 | N6 TTGAAGTATTGGCAACTGCCGGCGATACACATTTGGGAGGTGAAGACTTC  
\*\*\*\*\*

BIP3\_RirG043980 GACAACCGAGTTATTGACTACTTCGTTAAACTTTATAAAAAAGAAAAATAA  
BIP3\_RirG043980 | 0 | DNA2 GACAACCGAGTTATTGACTACTTCGTTAAACTTTATAAAAAAGAAAAATAA  
BIP3\_RirG043980 | 1 | DNA1 GACAACCGAGTTATTGACTACTTCGTTAAACTTTATAAAAAAGAAAAATAA  
BIP3\_RirG043980 | 2 | N33 GACAACCGAGTTATTGACTACTTCGTTAAACTTTATAAAAAAGAAAAATAA  
BIP3\_RirG043980 | 3 | N31 GACAACCGAGTTATTGACTACTTCGTTAAACTTTATAAAAAAGAAAAATAA  
BIP3\_RirG043980 | 5 | N36 GACAACCGAGTTATTGACTACTTCGTTAAACTTTATAAAAAAGAAAAATAA  
BIP3\_RirG043980 | 4 | N6 GACAACCGAGTTATTGACTACTTCGTTAAACTTTATAAAAAAGAAAAATAA  
\*\*\*\*\*



```
BIP3_RirG043980 | 5 | N36      ATACGGATATACCAATGA
BIP3_RirG043980 | 4 | N6      ATACGGATATACCAATGA
*****
```

Figure S3. **Alignments of BIP sequences across the seven *R. irregularis* assemblies.** The *BIP* sequence AJ319763.1 was used to identify the homologous sequences in the assemblies.
