# Supplementary material for: Single Nucleus Genome Sequencing Reveals High Similarity among Nuclei of an Endomycorrhizal Fungus
Source: PubMed Central journal article supplement (PMC3886924; doi:10.1371/journal.pgen.1004078), 2014-01-09
Supplement: pgen.1004078.s004.pdf [file pgen.1004078.s004.pdf]

**Copy 1 of Bg112:**

|            |  |   |      |                                                                |
|------------|--|---|------|----------------------------------------------------------------|
| GU930824.1 |  | 1 | Rir  | GATACTGGGAAGTGACCATCAGCTCTTGTCTTACTTTTCTTTGAAGTACGTTTCTTCTTC   |
| GU930824.1 |  | 1 | DNA1 | GATACTGGGAAGTGACCATCAGCTCTTGTCTTACTTTTCTTTGAAGTACGTTTCTTCTTC   |
| GU930824.1 |  | 1 | N31  | GATACTGGGAAGTGACCATCAGCTCTTGTCTTACTTTTCTTTGAAGTACGTTTCTTCTTC   |
| GU930824.1 |  | 1 | DNA2 | GATACTGGGAAGTGACCATCAGCTCTTGTCTTACTTTTCTTTGAAGTACGTTTCTTCTTC   |
| *****      |  |   |      |                                                                |
| GU930824.1 |  | 1 | Rir  | TTTTACCTTTCTTCTCACTATTCTCTTTATTATTATTATTATTATTATTATTATTATTATTA |
| GU930824.1 |  | 1 | DNA1 | TTTTACCTTTCTTCTCACTATTCTCTTTATTATTATTATTATTATTATTATTATTATTATTA |
| GU930824.1 |  | 1 | N31  | TTTTACCTTTCTTCTCACTATTCTCTTTATTATTATTATTATTATTATTATTATTATTATTA |
| GU930824.1 |  | 1 | DNA2 | TTTTACCTTTCTTCTCACTATTCTCTTTATTATTATTATTATTATTATTATTATTATTATTA |
| *****      |  |   |      |                                                                |
| GU930824.1 |  | 1 | Rir  | AGATTATGAATATCTTCATCAGATGAATAAATATGAGGATCGGAGAATTTGATACGACC    |
| GU930824.1 |  | 1 | DNA1 | AGATTATGAATATCTTCATCAGATGAATAAATATGAGGATCGGAGAATTTGATACGACC    |
| GU930824.1 |  | 1 | N31  | AGATTATGAATATCTTCATCAGATGAATAAATATGAGGATCGGAGAATTTGATACGACC    |
| GU930824.1 |  | 1 | DNA2 | AGATTATGAATATCTTCATCAGATGAATAAATATGAGGATCGGAGAATTTGATACGACC    |
| *****      |  |   |      |                                                                |

**Copy 2 of Bg112:**

|            |  |   |      |                                                                  |
|------------|--|---|------|------------------------------------------------------------------|
| GU930824.1 |  | 3 | Rir  | GAAACTGGGAAGTGACCATCAGCTCTTATTGAAGTACGTTTCTTCTTTTACCTTTC         |
| GU930824.1 |  | 2 | N6   | GAAACTGGGAAGTGACCATCAGCTCTTATTGAAGTACGTTTCTTCTTTTACCTTTC         |
| GU930824.1 |  | 2 | DNA1 | GAAACTGGGAAGTGACCATCAGCTCTTATTGAAGTACGTTTCTTCTTTTACCTTTC         |
| GU930824.1 |  | 2 | DNA2 | GAAACTGGGAAGTGACCATCAGCTCTTATTGAAGTACGTTTCTTCTTTTACCTTTC         |
| GU930824.1 |  | 2 | N33  | GAAACTGGGAAGTGACCATCAGCTCTTATTGAAGTACGTTTCTTCTTTTACCTTTC         |
| GU930824.1 |  | 2 | N31  | GAAACTGGGAAGTGACCATCAGCTCTTATTGAAGTACGTTTCTTCTTTTACCTTTC         |
| *****      |  |   |      |                                                                  |
| GU930824.1 |  | 3 | Rir  | TTCTCACTATTCTCTTTATTATTATTATTATTATTATTATTATTATTATTAAAGATTATGAATA |
| GU930824.1 |  | 2 | N6   | TTCTCACTATTCTCTTTATTATTATTATTATTATTATTATTATTATTATTAAAGATTATGAATA |
| GU930824.1 |  | 2 | DNA1 | TTCTCACTATTCTCTTTATTATTATTATTATTATTATTATTATTATTATTAAAGATTATGAATA |
| GU930824.1 |  | 2 | DNA2 | TTCTCACTATTCTCTTTATTATTATTATTATTATTATTATTATTATTATTAAAGATTATGAATA |
| GU930824.1 |  | 2 | N33  | TTCTCACTATTCTCTTTATTATTATTATTATTATTATTATTATTATTATTAAAGATTATGAATA |
| GU930824.1 |  | 2 | N31  | TTCTCACTATTCTCTTTATTATTATTATTATTATTATTATTATTATTATTAAAGATTATGAATA |
| *****      |  |   |      |                                                                  |
| GU930824.1 |  | 3 | Rir  | TCTTCATCAGATGAATAAATATGAGGATCGGAGAATTTGATATGACCT                 |
| GU930824.1 |  | 2 | N6   | TCTTCATCAGATGAATAAATATGAGGATCGGAGAATTTGATATGACCT                 |
| GU930824.1 |  | 2 | DNA1 | TCTTCATCAGATGAATAAATATGAGGATCGGAGAATTTGATATGACCT                 |
| GU930824.1 |  | 2 | DNA2 | TCTTCATCAGATGAATAAATATGAGGATCGGAGAATTTGATATGACCT                 |
| GU930824.1 |  | 2 | N33  | TCTTCATCAGATGAATAAATATGAGGATCGGAGAATTTGATATGACCT                 |
| GU930824.1 |  | 2 | N31  | TCTTCATCAGATGAATAAATATGAGGATCGGAGAATTTGATATGACCT                 |
| *****      |  |   |      |                                                                  |

**Copy 3 of Bg112:**

|            |  |   |      |                                                              |
|------------|--|---|------|--------------------------------------------------------------|
| GU930824.1 |  | 3 | Rir  | GAAACCGGGAAGTGACCATCAGCTCTTGTCTTACTTTTCATTGAAGTACGTTTCTTCTTC |
| GU930824.1 |  | 3 | N6   | GAAACCGGGAAGTGACCATCAGCTCTTGTCTTACTTTTCATTGAAGTACGTTTCTTCTTC |
| GU930824.1 |  | 3 | DNA1 | GAAACCGGGAAGTGACCATCAGCTCTTGTCTTACTTTTCATTGAAGTACGTTTCTTCTTC |
| GU930824.1 |  | 3 | DNA2 | GAAACCGGGAAGTGACCATCAGCTCTTGTCTTACTTTTCATTGAAGTACGTTTCTTCTTC |
| GU930824.1 |  | 3 | N36  | GAAACCGGGAAGTGACCATCAGCTCTTGTCTTACTTTTCATTGAAGTACGTTTCTTCTTC |
| GU930824.1 |  | 3 | N31  | GAAACCGGGAAGTGACCATCAGCTCTTGTCTTACTTTTCATTGAAGTACGTTTCTTCTTC |
| *****      |  |   |      |                                                              |
| GU930824.1 |  | 3 | Rir  | TTTTACCTTTCTTCTCACTATACTCTTTATTATTATTATTAAAGATTATAAATATCTTCA |
| GU930824.1 |  | 3 | N6   | TTTTACCTTTCTTCTCACTATACTCTTTATTATTATTATTAAAGATTATAAATATCTTCA |
| GU930824.1 |  | 3 | DNA1 | TTTTACCTTTCTTCTCACTATACTCTTTATTATTATTATTAAAGATTATAAATATCTTCA |
| GU930824.1 |  | 3 | DNA2 | TTTTACCTTTCTTCTCACTATACTCTTTATTATTATTATTAAAGATTATAAATATCTTCA |
| GU930824.1 |  | 3 | N36  | TTTTACCTTTCTTCTCACTATACTCTTTATTATTATTATTAAAGATTATAAATATCTTCA |
| GU930824.1 |  | 3 | N31  | TTTTACCTTTCTTCTCACTATACTCTTTATTATTATTATTAAAGATTATAAATATCTTCA |
| *****      |  |   |      |                                                              |
| GU930824.1 |  | 3 | Rir  | TCAGATGAATAAATATGAGGATTGGAGAATTTGATATGACCT                   |
| GU930824.1 |  | 3 | N6   | TCAGATGAATAAATATGAGGATTGGAGAATTTGATATGACCT                   |
| GU930824.1 |  | 3 | DNA1 | TCAGATGAATAAATATGAGGATTGGAGAATTTGATATGACCT                   |
| GU930824.1 |  | 3 | DNA2 | TCAGATGAATAAATATGAGGATTGGAGAATTTGATATGACCT                   |
| GU930824.1 |  | 3 | N36  | TCAGATGAATAAATATGAGGATTGGAGAATTTGATATGACCT                   |
| GU930824.1 |  | 3 | N31  | TCAGATGAATAAATATGAGGATTGGAGAATTTGATATGACCT                   |
| *****      |  |   |      |                                                              |

Figure S4. Alignments of *Bg112* sequences across seven *R. irregularis* assemblies.

The *Bg112* sequence GU930824.1 was used to identify the homologous sequences in the six assemblies.
