# Supplementary material for: Single Nucleus Genome Sequencing Reveals High Similarity among Nuclei of an Endomycorrhizal Fungus
Source: PLoS Genet. 2014 Jan 9;10(1):e1004078. doi: 10.1371/journal.pgen.1004078 (PMC3886924; doi:10.1371/journal.pgen.1004078)
Supplement: Table S3 — Overview of SNPs and INDELs among the four single nuclei and the two mycelial samples based on reference-free variant calling by de novo assembly using Cortex. SNP_FROM_COMPLEX (INDEL_FROM_COMPLEX)*: SNP (INDEL) called from composite variants consisting of clusters of nearby SNPs, or SNPs and indels, or large deletions with a small insertion at the breakpoint etc, according to the Cortex manual: http://cortexassembler.sourceforge.net/cortex_var_user_manual.pdf. Total length*: the sum of insertion size, deletion size and the number of SNPs, including SNP_FROM_COMPLEX. (XLSX) [file pgen.1004078.s010.xlsx]

## Sheet: Sheet1
Table S3. Overview of SNPs and INDELs among the four single nuclei ant the two mycelial samples based on reference free variant calling by de novo assembly using Cortex.
Group	SNP	SNP_FROM_COMPLEX	INS	DEL	SNP_FROM_COMPLEX	INV_INDEL	Insertion number	Deletion number	Total number of variants	Total length (bp)*
							(size in bp)	(size in bp)
Four single nuclei	37405	101720	3174	3274	20010	52	13,248 (91,921)	13,262 (94,521)	165635	227021
Two mycelial samples	1171	86442	221	185	16329	24	8,456 (50,652)	8,298 (50,588)	104372	188853
SNP_FROM_COMPLEX (INDEL_FROM_COMPLEX)*: SNP (INDEL) called from composite variants consisting of clusters of nearby SNPs, or SNPs and indels, or large deletions with a small insertion at the breakpoint etc, according to the Cortex manual: http://cortexassembler.sourceforge.net/cortex_var_user_manual.pdf.
* = the sum of insertion size, deletion size and the number of SNPs, including SNP_FROM_COMPLEX.
