# Supplementary material for: Single Nucleus Genome Sequencing Reveals High Similarity among Nuclei of an Endomycorrhizal Fungus
Source: PLoS Genet. 2014 Jan 9;10(1):e1004078. doi: 10.1371/journal.pgen.1004078 (PMC3886924; doi:10.1371/journal.pgen.1004078)
Supplement: Table S5 — The functional annotation of protein-coding genes. Group ID = OrthoMCL group identifier number (corresponding to Supplementary table 3), SubgroupID = OrthoMCL subgroup number, GO = identifiers in Gene Ontology database (www.geneontology.org); PfamA = family domain identifiers in Pfam database (pfam.sanger.ac.uk); InterPro = domain identifiers in InterPro database (www.ebi.ac.uk/interpro). (XLSX) [file pgen.1004078.s012.xlsx]

## Sheet: Supplemental data 5 The functio
Table S5. The functional annotation of genes.
GeneID	GroupID	SubgroupID	GO	PfamA	InterPro
RirG000010	2439	2439_1	GO:0000287=>magnesium ion binding=>mak_human ame: full=serine threonine-protein kinase mak ame: full=male germ cell-associated kinase;GO:0001917=>photoreceptor inner segment=>mak_human ame: full=serine threonine-protein kinase mak ame: full=male germ cell-associated kinase;GO:0003713=>transcription coactivator activity=>mak_human ame: full=serine threonine-protein kinase mak ame: full=male germ c…	PF00069=>Protein kinase domain;	IPR011009 (Protein kinase-like domain)
RirG000020	4148	4148_1	GO:0016192=>vesicle-mediated transport=>stx8_rat ame: full=syntaxin-8;GO:0043231=>intracellular membrane-bounded organelle=>stx8_rat ame: full=syntaxin-8;GO:0044425=>membrane part=>stx8_rat ame: full=syntaxin-8;GO:0044444=>cytoplasmic part=>stx8_rat ame: full=syntaxin-8);	PF05739=>SNARE domain;	IPR000727 (Target SNARE coiled-coil domain)
RirG000030	1530	1530_1	GO:0005813=>centrosome=>mal3_schpo ame: full=microtubule integrity protein mal3;GO:0005819=>spindle=>mal3_schpo ame: full=microtubule integrity protein mal3;GO:0005881=>cytoplasmic microtubule=>mal3_schpo ame: full=microtubule integrity protein mal3;GO:0007067=>mitosis=>mal3_schpo ame: full=microtubule integrity protein mal3;GO:0030496=>midbody=>mal3_schpo ame: full=microtubule integrity protein …	PF00307=>Calponin homology (CH) domain;PF03271=>EB1-like C-terminal motif;	IPR001715 (Calponin homology domain; IPR004953 (EB1, C-terminal)
RirG000040	6013	6013_1	GO:0000506=>glycosylphosphatidylinositol-N-acetylglucosaminyltransferase (GPI-GnT) complex=>dpm2_mouse ame: full=dolichol phosphate-mannose biosynthesis regulatory protein;GO:0004582=>dolichyl-phosphate beta-D-mannosyltransferase activity=>dpm2_mouse ame: full=dolichol phosphate-mannose biosynthesis regulatory protein;GO:0005515=>protein binding=>dpm2_mouse ame: full=dolichol phosphate-mannose bi…	PF07297=>Dolichol phosphate-mannose biosynthesis regulatory protein (DPM2);PF08510=>PIG-P;	IPR009914 (Dolichol phosphate-mannose biosynthesis regulatory; IPR013717 (PIG-P)
RirG000050	11931	11931_1		PF08595=>RXT2-like;N-terminal;	IPR013904 (RXT2-like, N-terminal)
RirG000060	745	745_1	GO:0000302=>response to reactive oxygen species=>ydc1_schpo ame: full=uncharacterized rna-binding protein;GO:0000381=>regulation of alternative mRNA splicing, via spliceosome=>ydc1_schpo ame: full=uncharacterized rna-binding protein;GO:0001047=>core promoter binding=>ydc1_schpo ame: full=uncharacterized rna-binding protein;GO:0003682=>chromatin binding=>ydc1_schpo ame: full=uncharacterized rna-bi…	PF00076=>RNA recognition motif. (a.k.a. RRM;RBD, or RNP domain);	IPR012677 (Nucleotide-binding, alpha-beta plait)
RirG000070	6164	6164_1
RirG000080	15020	15020_1		PF02946=>GTF2I-like repeat;	IPR004212 (GTF2I-like repeat)
RirG000090	292	292_2
RirG000100	1978	1978_1	GO:0005515=>protein binding=>dbp8_schpo ame: full=atp-dependent rna helicase dbp8;GO:0005634=>nucleus=>dbp8_schpo ame: full=atp-dependent rna helicase dbp8;GO:0006364=>rRNA processing=>dbp8_schpo ame: full=atp-dependent rna helicase dbp8;GO:0009561=>megagametogenesis=>dbp8_schpo ame: full=atp-dependent rna helicase dbp8;GO:0009791=>post-embryonic development=>dbp8_schpo ame: full=atp-dependent rn…	PF00270=>DEAD/DEAH box helicase;PF00271=>Helicase conserved C-terminal domain;	IPR001650 (Helicase, C-terminal; IPR014014 (RNA helicase, DEAD-box type, Q motif; IPR014021 (Helicase, superfamily 1/2, ATP-binding domain)
RirG000110			GO:0001666=>response to hypoxia=>tsc2_human ame: full=tuberin ame: full=tuberous sclerosis 2 protein;GO:0001843=>neural tube closure=>tsc2_human ame: full=tuberin ame: full=tuberous sclerosis 2 protein;GO:0005096=>GTPase activator activity=>tsc2_human ame: full=tuberin ame: full=tuberous sclerosis 2 protein;GO:0005634=>nucleus=>tsc2_human ame: full=tuberin ame: full=tuberous sclerosis 2 protein;G…	PF11864=>Domain of unknown function (DUF3384);
RirG000120	11119	11119_1
RirG000130	55	55_2
RirG000140
RirG000150	75	75_1
RirG000160	257	257_2
RirG000170	120	120_1
RirG000180
RirG000190
RirG000200	6935	6935_1
RirG000210	11171	11171_1
RirG000220	2538	2538_1	GO:0000146=>microfilament motor activity=>yl88_schpo ame: full=dilute domain-containing protein;GO:0000149=>SNARE binding=>yl88_schpo ame: full=dilute domain-containing protein;GO:0006887=>exocytosis=>yl88_schpo ame: full=dilute domain-containing protein;GO:0007154=>cell communication=>yl88_schpo ame: full=dilute domain-containing protein;GO:0008152=>metabolic process=>yl88_schpo ame: full=dilute…	PF01843=>DIL domain;	IPR002710 (Dilute)
RirG000230			GO:0005515=>protein binding=>pigt_human ame: full=gpi transamidase component pig-t ame: full=phosphatidylinositol-glycan biosynthesis class t protein flags: precursor;GO:0006497=>protein lipidation=>pigt_human ame: full=gpi transamidase component pig-t ame: full=phosphatidylinositol-glycan biosynthesis class t protein flags: precursor;GO:0030176=>integral to endoplasmic reticulum membrane=>pigt_h…	PF04113=>Gpi16 subunit;GPI transamidase component;	IPR007245 (Gpi16 subunit, GPI transamidase component)
RirG000240	7878	7878_1
RirG000250	11228	11228_1
RirG000260	4934	4934_1		PF05347=>Complex 1 protein (LYR family);	IPR008011 (Complex 1 LYR protein)
RirG000270			GO:0000731=>DNA synthesis involved in DNA repair=>rad54_schpo ame: full=dna repair protein rhp54 ame: full=rad54 homolog 1;GO:0000733=>DNA strand renaturation=>rad54_schpo ame: full=dna repair protein rhp54 ame: full=rad54 homolog 1;GO:0003678=>DNA helicase activity=>rad54_schpo ame: full=dna repair protein rhp54 ame: full=rad54 homolog 1;GO:0005515=>protein binding=>rad54_schpo ame: full=dna rep…	PF00176=>SNF2 family N-terminal domain;	IPR000330 (SNF2-related; IPR014021 (Helicase, superfamily 1/2, ATP-binding domain)
RirG000280	22	22_3
RirG000290
RirG000300	884	884_1
RirG000310
RirG000320	12843	12843_1	GO:0006886=>intracellular protein transport=>ka111_schpo ame: full=importin beta-like protein kap111 ame: full=karyopherin-111;GO:0044424=>intracellular part=>ka111_schpo ame: full=importin beta-like protein kap111 ame: full=karyopherin-111);
RirG000330	14790	14790_1		PF00505=>HMG (high mobility group) box;	IPR009071 (High mobility group, superfamily)
RirG000340			GO:0000398=>mRNA splicing, via spliceosome=>slu7_crynb ame: full=pre-mrna-splicing factor slu7;GO:0005488=>binding=>slu7_crynb ame: full=pre-mrna-splicing factor slu7;GO:0030529=>ribonucleoprotein complex=>slu7_crynb ame: full=pre-mrna-splicing factor slu7;GO:0044428=>nuclear part=>slu7_crynb ame: full=pre-mrna-splicing factor slu7);
RirG000350	391	391_2	GO:0000082=>G1/S transition of mitotic cell cycle=>tor2_schpo ame: full=phosphatidylinositol 3-kinase tor2 short=pi3-kinase tor2 short=pi3k tor2 short= ns-3-kinase tor2;GO:0000139=>Golgi membrane=>tor2_schpo ame: full=phosphatidylinositol 3-kinase tor2 short=pi3-kinase tor2 short=pi3k tor2 short= ns-3-kinase tor2;GO:0000911=>cytokinesis by cell plate formation=>tor2_schpo ame: full=phosphatidylin…	PF00454=>Phosphatidylinositol 3- and 4-kinase;PF08771=>Rapamycin binding domain;	IPR009076 (FKBP12-rapamycin-associated protein, FKBP12-rapamycin-binding; IPR011009 (Protein kinase-like domain)
RirG000360	3611	3611_1
RirG000370	6918	6918_1	GO:0005488=>binding=>hltf_human ame: full=helicase-like transcription factor ame: full=dna-binding protein plasminogen activator inhibitor 1 regulator ame: full=hip116 ame: full=ring finger protein 80 ame: full=swi snf-related matrix-associated actin-dependent regulator of chromatin subfamily a member 3 ame: full=sucrose nonfermenting protein 2-like 3;GO:0005634=>nucleus=>hltf_human ame: full=hel…	PF00176=>SNF2 family N-terminal domain;PF08797=>HIRAN domain;	IPR000330 (SNF2-related; IPR001878 (Zinc finger, CCHC-type; IPR014905 (HIP116, Rad5p N-terminal)
RirG000380	15096	15096_1
RirG000390	3283	3283_1		PF00276=>Ribosomal protein L23;	IPR013025 (Ribosomal protein L25/L23)
RirG000400	543	543_1	GO:0001541=>ovarian follicle development=>sco1_yeast ame: full=protein mitochondrial flags: precursor;GO:0001701=>in utero embryonic development=>sco1_yeast ame: full=protein mitochondrial flags: precursor;GO:0002020=>protease binding=>sco1_yeast ame: full=protein mitochondrial flags: precursor;GO:0002318=>myeloid progenitor cell differentiation=>sco1_yeast ame: full=protein mitochondrial flags: …	PF02630=>SCO1/SenC;	IPR003782 (Copper chaperone SCO1/SenC; IPR012336 (Thioredoxin-like fold)
RirG000410	1431	1431_1
RirG000420	6931	6931_1
RirG000430	75	75_1
RirG000440			GO:0016020=>membrane=>y2987_anasp ame: full=upf0187 protein alr2987);	PF01062=>Bestrophin;RFP-TM, chloride channel;	IPR021134 (Bestrophin/UPF0187)
RirG000450	565	565_1	GO:0005515=>protein binding=>ap1s1_schpo ame: full=ap-1 complex subunit sigma-1 ame: full=sigma1-adaptin;GO:0005765=>lysosomal membrane=>ap1s1_schpo ame: full=ap-1 complex subunit sigma-1 ame: full=sigma1-adaptin;GO:0005829=>cytosol=>ap1s1_schpo ame: full=ap-1 complex subunit sigma-1 ame: full=sigma1-adaptin;GO:0006301=>postreplication repair=>ap1s1_schpo ame: full=ap-1 complex subunit sigma-1 am…	PF01217=>Clathrin adaptor complex small chain;	IPR016635 (Adaptor protein complex, sigma subunit)
RirG000460	893	893_1	GO:0003785=>actin monomer binding=>its3_schpo ame: full=phosphatidylinositol 4-phosphate 5-kinase its3 ame: full=1-phosphatidylinositol 4-phosphate kinase ame: full=diphosphoinositide kinase ame: full=pip5k ame: full= ns p-5-kinase;GO:0005730=>nucleolus=>its3_schpo ame: full=phosphatidylinositol 4-phosphate 5-kinase its3 ame: full=1-phosphatidylinositol 4-phosphate kinase ame: full=diphosphoinosi…	PF01504=>Phosphatidylinositol-4-phosphate 5-Kinase;	IPR002498 (Phosphatidylinositol-4-phosphate 5-kinase, core)
RirG000470			GO:0004725=>protein tyrosine phosphatase activity=>y1500_arath ame: full=probable tyrosine-protein phosphatase at1g05000;GO:0005737=>cytoplasm=>y1500_arath ame: full=probable tyrosine-protein phosphatase at1g05000;GO:0007243=>intracellular protein kinase cascade=>y1500_arath ame: full=probable tyrosine-protein phosphatase at1g05000;GO:0035335=>peptidyl-tyrosine dephosphorylation=>y1500_arath ame:…	PF03162=>Tyrosine phosphatase family;	IPR004861 (Protein-tyrosine phosphatase, SIW14-like)
RirG000480
RirG000490	2536	2536_1		PF11221=>Subunit 21 of Mediator complex;	IPR021384 (Mediator complex, subunit Med21)
RirG000500	8	8_9	GO:0005515=>protein binding=>ybeq_ecoli ame: full=uncharacterized protein;GO:0005737=>cytoplasm=>ybeq_ecoli ame: full=uncharacterized protein;GO:0010942=>positive regulation of cell death=>ybeq_ecoli ame: full=uncharacterized protein;GO:0016310=>phosphorylation=>ybeq_ecoli ame: full=uncharacterized protein;GO:0016772=>transferase activity, transferring phosphorus-containing groups=>ybeq_ecoli ame…	PF07714=>Protein tyrosine kinase;PF08238=>Sel1 repeat;	IPR011009 (Protein kinase-like domain; IPR011990 (Tetratricopeptide-like helical)
RirG000510
RirG000520	20	20_3
RirG000530	20	20_5
RirG000540			GO:0000278=>mitotic cell cycle=>rfc3_schpo ame: full=replication factor c subunit 3 short=replication factor c3;GO:0000723=>telomere maintenance=>rfc3_schpo ame: full=replication factor c subunit 3 short=replication factor c3;GO:0005515=>protein binding=>rfc3_schpo ame: full=replication factor c subunit 3 short=replication factor c3;GO:0005634=>nucleus=>rfc3_schpo ame: full=replication factor c s…	PF08542=>Replication factor C C-terminal domain;	IPR008921 (DNA polymerase III, clamp loader complex, gamma/delta/delta subunit, C-terminal)
RirG000550	458	458_1	GO:0001726=>ruffle=>vps21_yeast ame: full=vacuolar protein sorting-associated protein 21 ame: full=gtp-binding protein ypt51 ame: full=vacuolar protein-targeting protein 12;GO:0003677=>DNA binding=>vps21_yeast ame: full=vacuolar protein sorting-associated protein 21 ame: full=gtp-binding protein ypt51 ame: full=vacuolar protein-targeting protein 12;GO:0003700=>sequence-specific DNA binding transc…	PF00071=>Ras family;	IPR005225 (Small GTP-binding protein)
RirG000560			GO:0005730=>nucleolus=>fcf1_human ame: full=rrna-processing protein fcf1 homolog;GO:0006364=>rRNA processing=>fcf1_human ame: full=rrna-processing protein fcf1 homolog);	PF04900=>Fcf1;	IPR006984 (Protein of unknown function DUF652)
RirG000570	4351	4351_1
RirG000580	5535	5535_1
RirG000590	16	16_17		PF03101=>FAR1 DNA-binding domain;	IPR004330 (Transcription factor, FAR1-related)
RirG000600
RirG000610	18	18_1	GO:0009653=>anatomical structure morphogenesis=>klh10_rat ame: full=kelch-like protein 10;GO:0019953=>sexual reproduction=>klh10_rat ame: full=kelch-like protein 10;GO:0046546=>development of primary male sexual characteristics=>klh10_rat ame: full=kelch-like protein 10;GO:0048513=>organ development=>klh10_rat ame: full=kelch-like protein 10;GO:0048608=>reproductive structure development=>klh10_r…	PF00651=>BTB/POZ domain;PF07534=>TLD;	IPR006571 (TLDc; IPR011333 (BTB/POZ fold; IPR013089 (Kelch-related)
RirG000620	18	18_1	GO:0007275=>multicellular organismal development=>btbd3_mouse ame: full=btb poz domain-containing protein 3;GO:0022414=>reproductive process=>btbd3_mouse ame: full=btb poz domain-containing protein 3;GO:0048856=>anatomical structure development=>btbd3_mouse ame: full=btb poz domain-containing protein 3);	PF00651=>BTB/POZ domain;PF07534=>TLD;	IPR006571 (TLDc; IPR011333 (BTB/POZ fold; IPR013089 (Kelch-related)
RirG000630	65	65_1
RirG000640	2186	2186_1	GO:0000003=>reproduction=>stt3_schpo ame: full=dolichyl-diphosphooligosaccharide--protein glycosyltransferase subunit stt3 short=oligosaccharyl transferase subunit stt3;GO:0002119=>nematode larval development=>stt3_schpo ame: full=dolichyl-diphosphooligosaccharide--protein glycosyltransferase subunit stt3 short=oligosaccharyl transferase subunit stt3;GO:0004579=>dolichyl-diphosphooligosaccharide-…	PF02516=>Oligosaccharyl transferase STT3 subunit;	IPR003674 (Oligosaccharyl transferase, STT3 subunit)
RirG000650			GO:0000166=>nucleotide binding=>syh_schpo ame: full=histidine--trna mitochondrial ame: full=histidyl-trna synthetase short= flags: precursor;GO:0004812=>aminoacyl-tRNA ligase activity=>syh_schpo ame: full=histidine--trna mitochondrial ame: full=histidyl-trna synthetase short= flags: precursor;GO:0005730=>nucleolus=>syh_schpo ame: full=histidine--trna mitochondrial ame: full=histidyl-trna syntheta…		IPR004516 (Histidyl-tRNA synthetase, class IIa)
RirG000660	11936	11936_1
RirG000670	521	521_1
RirG000680
RirG000690	9069	9069_1
RirG000700	5821	5821_1	GO:0004674=>protein serine/threonine kinase activity=>yr826_mimiv ame: full= serine threonine-protein kinase receptor r826 flags: precursor;GO:0005515=>protein binding=>yr826_mimiv ame: full= serine threonine-protein kinase receptor r826 flags: precursor;GO:0006468=>protein phosphorylation=>yr826_mimiv ame: full= serine threonine-protein kinase receptor r826 flags: precursor;GO:0007049=>cell cycl…	PF07714=>Protein tyrosine kinase;	IPR011009 (Protein kinase-like domain)
RirG000710
RirG000720	125	125_1
RirG000730	1124	1124_1
RirG000740	1255	1255_1		PF00505=>HMG (high mobility group) box;	IPR009071 (High mobility group, superfamily)
RirG000750	61	61_2
RirG000760	1	1_122
RirG000770	4939	4939_1
RirG000780	1241	1241_1
RirG000790	12732	12732_1			IPR009038 (GOLD)
RirG000800			GO:0005622=>intracellular=>yde1_schpo ame: full=probable ubiquitin fusion degradation protein;GO:0006464=>cellular protein modification process=>yde1_schpo ame: full=probable ubiquitin fusion degradation protein);	PF00632=>HECT-domain (ubiquitin-transferase);	IPR000569 (HECT)
RirG000810	835	835_1
RirG000820	14937	14937_1	GO:0019048=>virus-host interaction=>vhsj_lambd ame: full=host specificity protein j);
RirG000830
RirG000840	9079	9079_1
RirG000850	7	7_14
RirG000860
RirG000870
RirG000880	2896	2896_1	GO:0001701=>in utero embryonic development=>ekia_dicdi ame: full=probable ethanolamine kinase a;GO:0001890=>placenta development=>ekia_dicdi ame: full=probable ethanolamine kinase a;GO:0004103=>choline kinase activity=>ekia_dicdi ame: full=probable ethanolamine kinase a;GO:0004305=>ethanolamine kinase activity=>ekia_dicdi ame: full=probable ethanolamine kinase a;GO:0005737=>cytoplasm=>ekia_dicdi …	PF01633=>Choline/ethanolamine kinase;	IPR011009 (Protein kinase-like domain)
RirG000890	8	8_4		PF08238=>Sel1 repeat;	IPR011990 (Tetratricopeptide-like helical)
RirG000900	3729	3729_1
RirG000910	14875	14875_1
RirG000920			GO:0000082=>G1/S transition of mitotic cell cycle=>cul4b_mouse ame: full=cullin-4b short=cul-4b;GO:0000090=>mitotic anaphase=>cul4b_mouse ame: full=cullin-4b short=cul-4b;GO:0000209=>protein polyubiquitination=>cul4b_mouse ame: full=cullin-4b short=cul-4b;GO:0000794=>condensed nuclear chromosome=>cul4b_mouse ame: full=cullin-4b short=cul-4b;GO:0000911=>cytokinesis by cell plate formation=>cul4b_m…	PF10557=>Cullin protein neddylation domain;	IPR011991 (Winged helix-turn-helix transcription repressor DNA-binding)
RirG000930					IPR008937 (Ras guanine nucleotide exchange factor)
RirG000940	6929	6929_1
RirG000950	884	884_1
RirG000960	2477	2477_1	GO:0005515=>protein binding=>ybeq_ecoli ame: full=uncharacterized protein;GO:0009987=>cellular process=>ybeq_ecoli ame: full=uncharacterized protein;GO:0016020=>membrane=>ybeq_ecoli ame: full=uncharacterized protein);	PF08238=>Sel1 repeat;	IPR011990 (Tetratricopeptide-like helical)
RirG000970	29	29_2	GO:0005488=>binding=>lrrx1_dicdi ame: full= leucine-rich repeat-containing protein ddb_g0290503;GO:0005856=>cytoskeleton=>lrrx1_dicdi ame: full= leucine-rich repeat-containing protein ddb_g0290503;GO:0006464=>cellular protein modification process=>lrrx1_dicdi ame: full= leucine-rich repeat-containing protein ddb_g0290503;GO:0016874=>ligase activity=>lrrx1_dicdi ame: full= leucine-rich repeat-cont…
RirG000980			GO:0005829=>cytosol=>amer1_human ame: full=amme syndrome candidate gene 1 protein;GO:0009651=>response to salt stress=>amer1_human ame: full=amme syndrome candidate gene 1 protein);	PF01871=>AMMECR1;	IPR002733 (AMMECR1)
RirG000990	2345	2345_1
RirG001000	1226	1226_1	GO:0000184=>nuclear-transcribed mRNA catabolic process, nonsense-mediated decay=>rl9_dicdi ame: full=60s ribosomal protein l9;GO:0001510=>RNA methylation=>rl9_dicdi ame: full=60s ribosomal protein l9;GO:0002119=>nematode larval development=>rl9_dicdi ame: full=60s ribosomal protein l9;GO:0003735=>structural constituent of ribosome=>rl9_dicdi ame: full=60s ribosomal protein l9;GO:0005730=>nucleolu…	PF00347=>Ribosomal protein L6;	IPR000702 (Ribosomal protein L6)
RirG001010
RirG001020	6880	6880_1		PF08642=>Histone deacetylation protein Rxt3;	IPR013951 (Histone deacetylation protein Rxt3)
RirG001030	257	257_1
RirG001040	257	257_3
RirG001050	257	257_1
RirG001060	257	257_3
RirG001070	1728	1728_1	GO:0000139=>Golgi membrane=>fab1_schpo ame: full=1-phosphatidylinositol 3-phosphate 5-kinase fab1 short=phosphatidylinositol 3-phosphate 5-kinase ame: full=diphosphoinositide kinase ame: full=type iii pip kinase short=pipkin-iii;GO:0005515=>protein binding=>fab1_schpo ame: full=1-phosphatidylinositol 3-phosphate 5-kinase fab1 short=phosphatidylinositol 3-phosphate 5-kinase ame: full=diphosphoinos…	PF00118=>TCP-1/cpn60 chaperonin family;PF01363=>FYVE zinc finger;PF01504=>Phosphatidylinositol-4-phosphate 5-Kinase;	IPR002423 (Chaperonin Cpn60/TCP-1; IPR002498 (Phosphatidylinositol-4-phosphate 5-kinase, core; IPR013083 (Zinc finger, RING/FYVE/PHD-type)
RirG001080	884	884_1
RirG001090
RirG001100	60	60_12		PF08238=>Sel1 repeat;	IPR011990 (Tetratricopeptide-like helical)
RirG001110	113	113_1
RirG001120	2539	2539_1	GO:0005488=>binding=>dml1_aspcl ame: full=protein dml1;GO:0005737=>cytoplasm=>dml1_aspcl ame: full=protein dml1;GO:0006996=>organelle organization=>dml1_aspcl ame: full=protein dml1;GO:0008283=>cell proliferation=>dml1_aspcl ame: full=protein dml1;GO:0030154=>cell differentiation=>dml1_aspcl ame: full=protein dml1;GO:0042981=>regulation of apoptotic process=>dml1_aspcl ame: full=protein dml1;GO:0…	PF10644=>Misato Segment II myosin-like domain;	IPR003008 (Tubulin/FtsZ, GTPase domain; IPR019605 (Misato Segment II, myosin-like)
RirG001130	3288	3288_1		PF00327=>Ribosomal protein L30p/L7e;	IPR005996 (Ribosomal protein L30, bacterial-type; IPR016082 (Ribosomal protein L30, ferredoxin-like fold domain)
RirG001140			GO:0004775=>succinate-CoA ligase (ADP-forming) activity=>sucb1_dicdi ame: full=succinyl- ligase subunit mitochondrial ame: full=atp-specific succinyl- synthetase subunit beta ame: full=succinyl- synthetase beta-a chain short=scs-betaa flags: precursor;GO:0004776=>succinate-CoA ligase (GDP-forming) activity=>sucb1_dicdi ame: full=succinyl- ligase subunit mitochondrial ame: full=atp-specific succin…	PF00549=>CoA-ligase;PF08442=>ATP-grasp domain;	IPR005809 (Succinyl-CoA synthetase, beta subunit; IPR016102 (Succinyl-CoA synthetase-like)
RirG001150	12803	12803_1
RirG001160	125	125_4
RirG001170	6	6_1		PF00651=>BTB/POZ domain;PF07534=>TLD;PF07707=>BTB And C-terminal Kelch;	IPR011333 (BTB/POZ fold; IPR013089 (Kelch-related)
RirG001180			GO:0003824=>catalytic activity=>bgalc_aspnc ame: full=probable beta-galactosidase c ame: full=lactase c flags: precursor);	PF01301=>Glycosyl hydrolases family 35;	IPR001944 (Glycoside hydrolase, family 35; IPR017853 (Glycoside hydrolase, catalytic core)
RirG001190	25	25_15	GO:0000723=>telomere maintenance=>geff_dicdi ame: full=ras guanine nucleotide exchange factor f ame: full= domain-containing protein f;GO:0005488=>binding=>geff_dicdi ame: full=ras guanine nucleotide exchange factor f ame: full= domain-containing protein f;GO:0006310=>DNA recombination=>geff_dicdi ame: full=ras guanine nucleotide exchange factor f ame: full= domain-containing protein f;GO:0006810…	PF01344=>Kelch motif;	IPR015915 (Kelch-type beta propeller)
RirG001200	4909	4909_1
RirG001210	7420	7420_1
RirG001220	7846	7846_1
RirG001230	274	274_1
RirG001240
RirG001250			GO:0003677=>DNA binding=>ai7_ustma ame: full=probable intron-encoded endonuclease ai7 contains: ame: full=truncated non-functional cytochrome oxidase 1 contains: ame: full=intron-encoded endonuclease ai7 flags: precursor;GO:0004129=>cytochrome-c oxidase activity=>ai7_ustma ame: full=probable intron-encoded endonuclease ai7 contains: ame: full=truncated non-functional cytochrome oxidase 1 contains…	PF00115=>Cytochrome C and Quinol oxidase polypeptide I;	IPR000883 (Cytochrome c oxidase, subunit I)
RirG001260	1	1_66		PF00078=>Reverse transcriptase (RNA-dependent DNA polymerase);	IPR015706 (RNA-directed DNA polymerase (reverse transcriptase))
RirG001270	4939	4939_1
RirG001280	7391	7391_1
RirG001290			GO:0000398=>mRNA splicing, via spliceosome=>rnc1_schpo ame: full=rna-binding protein rnc1 ame: full=rna-binding protein that suppresses calcineurin deletion 1;GO:0003697=>single-stranded DNA binding=>rnc1_schpo ame: full=rna-binding protein rnc1 ame: full=rna-binding protein that suppresses calcineurin deletion 1;GO:0003730=>mRNA 3'-UTR binding=>rnc1_schpo ame: full=rna-binding protein rnc1 ame: …	PF00013=>KH domain;	IPR004087 (K Homology)
RirG001300			GO:0004768=>stearoyl-CoA 9-desaturase activity=>sld1_klula ame: full=delta -fatty-acid desaturase ame: full=delta -sphingolipid desaturase;GO:0005506=>iron ion binding=>sld1_klula ame: full=delta -fatty-acid desaturase ame: full=delta -sphingolipid desaturase;GO:0005783=>endoplasmic reticulum=>sld1_klula ame: full=delta -fatty-acid desaturase ame: full=delta -sphingolipid desaturase;GO:0006636=>u…	PF00487=>Fatty acid desaturase;	IPR005804 (Fatty acid desaturase, type 1)
RirG001310			GO:0000166=>nucleotide binding=>at1a2_chick ame: full=sodium potassium-transporting atpase subunit alpha-2 short=na(+) k(+) atpase alpha-2 subunit ame: full=sodium pump subunit alpha-2;GO:0006814=>sodium ion transport=>at1a2_chick ame: full=sodium potassium-transporting atpase subunit alpha-2 short=na(+) k(+) atpase alpha-2 subunit ame: full=sodium pump subunit alpha-2;GO:0006942=>regulation of s…	PF00690=>Cation transporter/ATPase;N-terminus;	IPR001757 (ATPase, P-type, K/Mg/Cd/Cu/Zn/Na/Ca/Na/H-transporter; IPR004014 (ATPase, P-type cation-transporter, N-terminal)
RirG001320
RirG001330	6914	6914_1	GO:0019902=>phosphatase binding=>ppr21_human ame: full=protein phosphatase 1 regulatory subunit 21 ame: full=coiled-coil domain-containing protein 128 ame: full=klraq motif-containing protein 1);	PF10212=>Predicted coiled-coil domain-containing protein;	IPR019348 (Uncharacterised protein family, C-terminal)
RirG001340	3438	3438_1	GO:0004221=>ubiquitin thiolesterase activity=>ubp14_mouse ame: full=ubiquitin carboxyl-terminal hydrolase 14 ame: full=deubiquitinating enzyme 14 ame: full=ubiquitin thioesterase 14 ame: full=ubiquitin-specific-processing protease 14;GO:0004843=>ubiquitin-specific protease activity=>ubp14_mouse ame: full=ubiquitin carboxyl-terminal hydrolase 14 ame: full=deubiquitinating enzyme 14 ame: full=ubiqu…	PF00443=>Ubiquitin carboxyl-terminal hydrolase;	IPR001394 (Peptidase C19, ubiquitin carboxyl-terminal hydrolase 2)
RirG001350
RirG001360			GO:0006811=>ion transport=>yj23_schpo ame: full=uncharacterized protein flags: precursor;GO:0010960=>magnesium ion homeostasis=>yj23_schpo ame: full=uncharacterized protein flags: precursor;GO:0016323=>basolateral plasma membrane=>yj23_schpo ame: full=uncharacterized protein flags: precursor);	PF01595=>Domain of unknown function DUF21;	IPR002550 (Domain of unknown function DUF21)
RirG001370	70	70_1			IPR016093 (MIR motif)
RirG001380			GO:0000287=>magnesium ion binding=>gshb_yeast ame: full=glutathione synthetase short=gsh synthetase short=gsh-s ame: full=glutathione synthase;GO:0004363=>glutathione synthase activity=>gshb_yeast ame: full=glutathione synthetase short=gsh synthetase short=gsh-s ame: full=glutathione synthase;GO:0005524=>ATP binding=>gshb_yeast ame: full=glutathione synthetase short=gsh synthetase short=gsh-s ame…	PF03917=>Eukaryotic glutathione synthase;ATP binding domain;	IPR005615 (Glutathione synthase, eukaryotic)
RirG001390	1134	1134_1	GO:0002119=>nematode larval development=>gys_neucr ame: full=glycogen synthase;GO:0004373=>glycogen (starch) synthase activity=>gys_neucr ame: full=glycogen synthase;GO:0005536=>glucose binding=>gys_neucr ame: full=glycogen synthase;GO:0005739=>mitochondrion=>gys_neucr ame: full=glycogen synthase;GO:0005829=>cytosol=>gys_neucr ame: full=glycogen synthase;GO:0005978=>glycogen biosynthetic process=…	PF05693=>Glycogen synthase;	IPR008631 (Glycogen synthase)
RirG001400	1256	1256_1
RirG001410	8	8_11
RirG001420	15002	15002_1
RirG001430	3612	3612_1
RirG001440				PF00153=>Mitochondrial carrier protein;	IPR001993 (Mitochondrial substrate carrier)
RirG001450	14980	14980_1
RirG001460	14994	14994_1		PF02464=>Competence-damaged protein;	IPR008136 (CinA, C-terminal)
RirG001470			GO:0003824=>catalytic activity=>pldp1_arath ame: full=phospholipase d p1 short= p1 ame: full=phospholipase d zeta 1 short=pldzeta1 ame: full=phospholipase d1 phox and px-containing domain protein;GO:0005794=>Golgi apparatus=>pldp1_arath ame: full=phospholipase d p1 short= p1 ame: full=phospholipase d zeta 1 short=pldzeta1 ame: full=phospholipase d1 phox and px-containing domain protein;GO:0006952…		IPR015679 (Phospholipase D)
RirG001480			GO:0000303=>response to superoxide=>dhkj_dicdi ame: full=hybrid signal transduction histidine kinase j;GO:0004673=>protein histidine kinase activity=>dhkj_dicdi ame: full=hybrid signal transduction histidine kinase j;GO:0004721=>phosphoprotein phosphatase activity=>dhkj_dicdi ame: full=hybrid signal transduction histidine kinase j;GO:0005034=>osmosensor activity=>dhkj_dicdi ame: full=hybrid signa…	PF02518=>Histidine kinase-;DNA gyrase B-, and HSP90-like ATPase;	IPR005467 (Signal transduction histidine kinase, core)
RirG001490	5540	5540_1		PF00505=>HMG (high mobility group) box;	IPR009071 (High mobility group, superfamily)
RirG001500	2259	2259_1	GO:0000902=>cell morphogenesis=>necp2_rat ame: full=adaptin ear-binding coat-associated protein 2 short=necap-2;GO:0005215=>transporter activity=>necp2_rat ame: full=adaptin ear-binding coat-associated protein 2 short=necap-2;GO:0005905=>coated pit=>necp2_rat ame: full=adaptin ear-binding coat-associated protein 2 short=necap-2;GO:0006897=>endocytosis=>necp2_rat ame: full=adaptin ear-binding coat…	PF07933=>Protein of unknown function (DUF1681);	IPR012466 (Adaptin ear-binding coat-associated protein 1 NECAP-1)
RirG001510	65	65_7
RirG001520	5244	5244_1
RirG001530	15087	15087_1		PF07173=>Protein of unknown function (DUF1399);	IPR009836 (Protein of unknown function DUF1399)
RirG001540	148	148_2	GO:0005215=>transporter activity=>atc5_yeast ame: full=phospholipid-transporting atpase dnf1 ame: full=flippase dnf1;GO:0005515=>protein binding=>atc5_yeast ame: full=phospholipid-transporting atpase dnf1 ame: full=flippase dnf1;GO:0005783=>endoplasmic reticulum=>atc5_yeast ame: full=phospholipid-transporting atpase dnf1 ame: full=flippase dnf1;GO:0005886=>plasma membrane=>atc5_yeast ame: full=ph…		IPR001757 (ATPase, P-type, K/Mg/Cd/Cu/Zn/Na/Ca/Na/H-transporter; IPR023214 (HAD-like domain)
RirG001550	22	22_3		PF00069=>Protein kinase domain;	IPR011009 (Protein kinase-like domain)
RirG001560
RirG001570	2894	2894_1
RirG001580	6159	6159_1	GO:0005886=>plasma membrane=>ab4g_arath ame: full=abc transporter g family member 4 short=abc transporter short= 4 ame: full=white-brown complex homolog protein 4 short= 4;GO:0006950=>response to stress=>ab4g_arath ame: full=abc transporter g family member 4 short=abc transporter short= 4 ame: full=white-brown complex homolog protein 4 short= 4;GO:0009987=>cellular process=>ab4g_arath ame: full=a…	PF01061=>ABC-2 type transporter;	IPR013525 (ABC-2 type transporter)
RirG001590	2912	2912_1
RirG001600	392	392_1	GO:0000139=>Golgi membrane=>mns1_canal ame: full=mannosyl-oligosaccharide -alpha-mannosidase ame: full=man -alpha-mannosidase;GO:0004571=>mannosyl-oligosaccharide 1,2-alpha-mannosidase activity=>mns1_canal ame: full=mannosyl-oligosaccharide -alpha-mannosidase ame: full=man -alpha-mannosidase;GO:0005509=>calcium ion binding=>mns1_canal ame: full=mannosyl-oligosaccharide -alpha-mannosidase ame: ful…	PF01532=>Glycosyl hydrolase family 47;	IPR001382 (Glycoside hydrolase, family 47)
RirG001610	392	392_1	GO:0000139=>Golgi membrane=>mns1_canal ame: full=mannosyl-oligosaccharide -alpha-mannosidase ame: full=man -alpha-mannosidase;GO:0004571=>mannosyl-oligosaccharide 1,2-alpha-mannosidase activity=>mns1_canal ame: full=mannosyl-oligosaccharide -alpha-mannosidase ame: full=man -alpha-mannosidase;GO:0005509=>calcium ion binding=>mns1_canal ame: full=mannosyl-oligosaccharide -alpha-mannosidase ame: ful…	PF01532=>Glycosyl hydrolase family 47;	IPR001382 (Glycoside hydrolase, family 47)
RirG001620
RirG001630	5425	5425_1	GO:0016740=>transferase activity=>mdmc_strmy ame: full=o-methyltransferase mdmc;GO:0044249=>cellular biosynthetic process=>mdmc_strmy ame: full=o-methyltransferase mdmc;GO:0044444=>cytoplasmic part=>mdmc_strmy ame: full=o-methyltransferase mdmc);	PF01596=>O-methyltransferase;	IPR002935 (O-methyltransferase, family 3)
RirG001640	2068	2068_1		PF00939=>Sodium:sulfate symporter transmembrane region;PF03105=>SPX domain;	IPR001898 (Sodium/sulphate symporter; IPR004331 (SPX, N-terminal)
RirG001650	12777	12777_1		PF00646=>F-box domain;	IPR022364 (F-box domain, Skp2-like)
RirG001660	15040	15040_1
RirG001670	56	56_2	GO:0003006=>developmental process involved in reproduction=>klh10_human ame: full=kelch-like protein 10;GO:0030154=>cell differentiation=>klh10_human ame: full=kelch-like protein 10;GO:0044424=>intracellular part=>klh10_human ame: full=kelch-like protein 10;GO:0048731=>system development=>klh10_human ame: full=kelch-like protein 10);	PF00651=>BTB/POZ domain;PF07534=>TLD;PF07707=>BTB And C-terminal Kelch;	IPR011333 (BTB/POZ fold; IPR013089 (Kelch-related)
RirG001680	59	59_2
RirG001690			GO:0009451=>RNA modification=>pus10_mouse ame: full= trna pseudouridine synthase pus10 ame: full=coiled-coil domain-containing protein 139 ame: full=trna pseudouridine 55 synthase short=psi55 synthase ame: full=trna pseudouridylate synthase ame: full=trna-uridine isomerase;GO:0016853=>isomerase activity=>pus10_mouse ame: full= trna pseudouridine synthase pus10 ame: full=coiled-coil domain-contain…
RirG001700	598	598_1
RirG001710	3965	3965_1	GO:0009082=>branched-chain amino acid biosynthetic process=>ilv6_yeast ame: full=acetolactate synthase small mitochondrial ame: full=acetohydroxy-acid synthase small subunit short=ahas short=als flags: precursor);	PF10369=>Small subunit of acetolactate synthase;	IPR004789 (Acetolactate synthase, small subunit)
RirG001720	26	26_26
RirG001730	6578	6578_1
RirG001740	3211	3211_1
RirG001750
RirG001760	61	61_1
RirG001770	155	155_1
RirG001780
RirG001790			GO:0005515=>protein binding=>pfd3_yeast ame: full=prefoldin subunit 3 ame: full=genes involved in microtubule biogenesis protein 2 ame: full=gim complex subunit 2 short= subunit 2;GO:0016272=>prefoldin complex=>pfd3_yeast ame: full=prefoldin subunit 3 ame: full=genes involved in microtubule biogenesis protein 2 ame: full=gim complex subunit 2 short= subunit 2;GO:0043231=>intracellular membrane-bo…	PF02996=>Prefoldin subunit;	IPR004127 (Prefoldin subunit)
RirG001800	7852	7852_1	GO:0002020=>protease binding=>peo1_chick ame: full=twinkle mitochondrial ame: full=progressive external ophthalmoplegia 1 protein homolog flags: precursor;GO:0003697=>single-stranded DNA binding=>peo1_chick ame: full=twinkle mitochondrial ame: full=progressive external ophthalmoplegia 1 protein homolog flags: precursor;GO:0006264=>mitochondrial DNA replication=>peo1_chick ame: full=twinkle mitoch…	PF06745=>KaiC;	IPR007694 (DNA helicase, DnaB-like, C-terminal; IPR014774 (Circadian clock protein KaiC/DNA repair protein RadA)
RirG001810	5538	5538_1
RirG001820	4624	4624_1
RirG001830	288	288_1
RirG001840	2514	2514_1	GO:0000077=>DNA damage checkpoint=>tiprl_dicdi ame: full=tip41-like protein;GO:0005515=>protein binding=>tiprl_dicdi ame: full=tip41-like protein;GO:0034048=>negative regulation of protein phosphatase type 2A activity=>tiprl_dicdi ame: full=tip41-like protein);	PF04176=>TIP41-like family ;	IPR007303 (TIP41-like protein)
RirG001850	2897	2897_1	GO:0000166=>nucleotide binding=>gpda_drome ame: full=glycerol-3-phosphate dehydrogenase cytoplasmic short=gpd-c short=gpdh-c;GO:0004367=>glycerol-3-phosphate dehydrogenase [NAD+] activity=>gpda_drome ame: full=glycerol-3-phosphate dehydrogenase cytoplasmic short=gpd-c short=gpdh-c;GO:0004368=>glycerol-3-phosphate dehydrogenase activity=>gpda_drome ame: full=glycerol-3-phosphate dehydrogenase cyto…	PF01210=>NAD-dependent glycerol-3-phosphate dehydrogenase N-terminus;PF07479=>NAD-dependent glycerol-3-phosphate dehydrogenase C-terminus;	IPR006168 (Glycerol-3-phosphate dehydrogenase, NAD-dependent; IPR008927 (6-phosphogluconate dehydrogenase, C-terminal-like; IPR016040 (NAD(P)-binding domain)
RirG001860	22	22_1	GO:0000166=>nucleotide binding=>ripk4_mouse ame: full=receptor-interacting serine threonine-protein kinase 4 ame: full=ankyrin repeat domain-containing protein 3 ame: full=pkc-associated protein kinase ame: full=pkc-regulated protein kinase;GO:0001819=>positive regulation of cytokine production=>ripk4_mouse ame: full=receptor-interacting serine threonine-protein kinase 4 ame: full=ankyrin repeat …	PF07714=>Protein tyrosine kinase;	IPR011009 (Protein kinase-like domain)
RirG001870	452	452_1	GO:0004686=>elongation factor-2 kinase activity=>vwka_dicdi ame: full=alpha-protein kinase vwka ame: full=von willebrand factor a alpha-kinase short=vwf kinase;GO:0005261=>cation channel activity=>vwka_dicdi ame: full=alpha-protein kinase vwka ame: full=von willebrand factor a alpha-kinase short=vwf kinase;GO:0006816=>calcium ion transport=>vwka_dicdi ame: full=alpha-protein kinase vwka ame: full…	PF02816=>Alpha-kinase family;	IPR002035 (von Willebrand factor, type A; IPR011009 (Protein kinase-like domain)
RirG001880	14	14_5	GO:0000075=>cell cycle checkpoint=>se1l2_mouse ame: full=protein sel-1 homolog 2 ame: full=suppressor of lin-12-like protein 2 short=sel-1l2 flags: precursor;GO:0000166=>nucleotide binding=>se1l2_mouse ame: full=protein sel-1 homolog 2 ame: full=suppressor of lin-12-like protein 2 short=sel-1l2 flags: precursor;GO:0004709=>MAP kinase kinase kinase activity=>se1l2_mouse ame: full=protein sel-1 hom…	PF07714=>Protein tyrosine kinase;PF08238=>Sel1 repeat;	IPR011009 (Protein kinase-like domain; IPR011990 (Tetratricopeptide-like helical)
RirG001890	4612	4612_1
RirG001900
RirG001910	15090	15090_1
RirG001920			GO:0005654=>nucleoplasm=>rpac1_bovin ame: full=dna-directed rna polymerases i and iii subunit rpac1 short=dna-directed rna polymerase i subunit c short=rna polymerases i and iii subunit ac1;GO:0005736=>DNA-directed RNA polymerase I complex=>rpac1_bovin ame: full=dna-directed rna polymerases i and iii subunit rpac1 short=dna-directed rna polymerase i subunit c short=rna polymerases i and iii subun…		IPR009025 (DNA-directed RNA polymerase, RBP11-like)
RirG001930	12770	12770_1
RirG001940
RirG001950	5248	5248_1
RirG001960					IPR012335 (Thioredoxin fold)
RirG001970	5506	5506_1		PF00474=>Sodium:solute symporter family;	IPR001734 (Sodium/solute symporter)
RirG001980
RirG001990	1434	1434_1
RirG002000	1828	1828_1	GO:0003006=>developmental process involved in reproduction=>klh10_human ame: full=kelch-like protein 10;GO:0030154=>cell differentiation=>klh10_human ame: full=kelch-like protein 10;GO:0044424=>intracellular part=>klh10_human ame: full=kelch-like protein 10;GO:0048731=>system development=>klh10_human ame: full=kelch-like protein 10);	PF00651=>BTB/POZ domain;PF07534=>TLD;	IPR006571 (TLDc; IPR011333 (BTB/POZ fold; IPR013089 (Kelch-related)
RirG002010	965	965_1
RirG002020	12738	12738_1	GO:0009987=>cellular process=>ybeq_ecoli ame: full=uncharacterized protein;GO:0050896=>response to stimulus=>ybeq_ecoli ame: full=uncharacterized protein);	PF08238=>Sel1 repeat;	IPR011990 (Tetratricopeptide-like helical)
RirG002030
RirG002040	2512	2512_1		PF00339=>Arrestin (or S-antigen);N-terminal domain;PF02752=>Arrestin (or S-antigen);C-terminal domain;	IPR011021 (Arrestin-like, N-terminal; IPR011022 (Arrestin-like, C-terminal; IPR014756 (Immunoglobulin E-set)
RirG002050	17356	17356_1
RirG002060	14840	14840_1
RirG002070	8	8_22		PF00069=>Protein kinase domain;PF08238=>Sel1 repeat;	IPR011009 (Protein kinase-like domain; IPR011990 (Tetratricopeptide-like helical)
RirG002080	4353	4353_1		PF05637=>galactosyl transferase GMA12/MNN10 family;	IPR008630 (Galactosyl transferase)
RirG002090	342	342_1	GO:0000904=>cell morphogenesis involved in differentiation=>hh_drops ame: full=protein hedgehog contains: ame: full=protein hedgehog n-product contains: ame: full=protein hedgehog c-product flags: precursor;GO:0001501=>skeletal system development=>hh_drops ame: full=protein hedgehog contains: ame: full=protein hedgehog n-product contains: ame: full=protein hedgehog c-product flags: precursor;GO:0…	PF01079=>Hint module;PF04548=>AIG1 family;	IPR001767 (Peptidase C46, hedgehog protein, hint region; IPR006703 (AIG1)
RirG002100	342	342_1		PF04548=>AIG1 family;	IPR006703 (AIG1)
RirG002110
RirG002120	14861	14861_1
RirG002130	1019	1019_1
RirG002140	4920	4920_1		PF03330=>Rare lipoprotein A (RlpA)-like double-psi beta-barrel;	IPR014733 (Barwin-like endoglucanase)
RirG002150	1033	1033_1	GO:0000184=>nuclear-transcribed mRNA catabolic process, nonsense-mediated decay=>rl32_spofr ame: full=60s ribosomal protein l32;GO:0003735=>structural constituent of ribosome=>rl32_spofr ame: full=60s ribosomal protein l32;GO:0006413=>translational initiation=>rl32_spofr ame: full=60s ribosomal protein l32;GO:0006414=>translational elongation=>rl32_spofr ame: full=60s ribosomal protein l32;GO:000…	PF01655=>Ribosomal protein L32;	IPR001515 (Ribosomal protein L32e)
RirG002160			GO:0000166=>nucleotide binding=>sywm_yeast ame: full=tryptophan--trna mitochondrial ame: full=tryptophanyl-trna synthetase short=;GO:0004812=>aminoacyl-tRNA ligase activity=>sywm_yeast ame: full=tryptophan--trna mitochondrial ame: full=tryptophanyl-trna synthetase short=;GO:0005759=>mitochondrial matrix=>sywm_yeast ame: full=tryptophan--trna mitochondrial ame: full=tryptophanyl-trna synthetase sh…	PF00579=>tRNA synthetases class I (W and Y);	IPR002306 (Tryptophanyl-tRNA synthetase, class Ib)
RirG002170	15099	15099_1		PF01258=>Prokaryotic dksA/traR C4-type zinc finger;	IPR012783 (Zinc finger, C4 DksA/TraR-type)
RirG002180
RirG002190				PF02661=>Fic/DOC family;	IPR003812 (Filamentation induced by cAMP/death on curing-related; IPR006440 (Death-on-curing protein; IPR023285 (Fic-like domain)
RirG002200
RirG002210
RirG002220				PF09560=>Sporulation protein YunB (Spo_YunB);	IPR014197 (Sporulation protein YunB)
RirG002230					IPR004223 (Vitamin B12-dependent methionine synthase, activation domain)
RirG002240
RirG002250	122	122_1	GO:0006810=>transport=>yhch_bacsu ame: full=uncharacterized abc transporter atp-binding protein;GO:0016787=>hydrolase activity=>yhch_bacsu ame: full=uncharacterized abc transporter atp-binding protein);	PF00005=>ABC transporter;	IPR003593 (ATPase, AAA+ type, core)
RirG002260
RirG002270
RirG002280	14789	14789_1	GO:0006259=>DNA metabolic process=>tnr7_entfa ame: full=transposon tn917 resolvase);	PF00239=>Resolvase;N terminal domain;PF02796=>Helix-turn-helix domain of resolvase;	IPR006119 (Resolvase, N-terminal; IPR009057 (Homeodomain-like)
RirG002290				PF01526=>Tn3 transposase DDE domain;	IPR002513 (Transposase, Tn3)
RirG002300
RirG002310
RirG002320
RirG002330	15071	15071_1
RirG002340	1605	1605_1	GO:0006629=>lipid metabolic process=>nb5r1_bovin ame: full=nadh-cytochrome b5 reductase 1 short=;GO:0009058=>biosynthetic process=>nb5r1_bovin ame: full=nadh-cytochrome b5 reductase 1 short=;GO:0016020=>membrane=>nb5r1_bovin ame: full=nadh-cytochrome b5 reductase 1 short=;GO:0016661=>oxidoreductase activity, acting on other nitrogenous compounds as donors=>nb5r1_bovin ame: full=nadh-cytochrome b5…	PF00175=>Oxidoreductase NAD-binding domain ;PF00970=>Oxidoreductase FAD-binding domain;	IPR001433 (Oxidoreductase FAD/NAD(P)-binding; IPR017938 (Riboflavin synthase-like beta-barrel)
RirG002350	9063	9063_1
RirG002360	6105	6105_1
RirG002370	1257	1257_1			IPR011990 (Tetratricopeptide-like helical)
RirG002380	5535	5535_1
RirG002390	9021	9021_1		PF07534=>TLD;	IPR013089 (Kelch-related)
RirG002400	14801	14801_1
RirG002410	7	7_4
RirG002420	7864	7864_1			IPR008929 (Chondroitin AC/alginate lyase)
RirG002430	3724	3724_1	GO:0005739=>mitochondrion=>tmt1_yeast ame: full=trans-aconitate 3-methyltransferase);	PF08241=>Methyltransferase domain;	IPR013216 (Methyltransferase type 11)
RirG002440
RirG002450	214	214_1
RirG002460	195	195_2
RirG002470
RirG002480	14927	14927_1
RirG002490	6906	6906_1
RirG002500	6561	6561_1
RirG002510	3217	3217_1
RirG002520	161	161_1
RirG002530	3216	3216_1
RirG002540	26	26_29
RirG002550	26	26_14
RirG002560	1129	1129_1	GO:0004129=>cytochrome-c oxidase activity=>co111_schpo ame: full=rsm22-cox11 tandem protein mitochondrial contains: ame: full=37s ribosomal protein s22-1 contains: ame: full=cytochrome c oxidase assembly protein cox11-1 flags: precursor;GO:0005739=>mitochondrion=>co111_schpo ame: full=rsm22-cox11 tandem protein mitochondrial contains: ame: full=37s ribosomal protein s22-1 contains: ame: full=cyto…	PF04442=>Cytochrome c oxidase assembly protein CtaG/Cox11;	IPR007533 (Cytochrome c oxidase assembly protein CtaG/Cox11)
RirG002570	14930	14930_1
RirG002580	11157	11157_1
RirG002590
RirG002600
RirG002610	14776	14776_1	GO:0001819=>positive regulation of cytokine production=>ripk1_human ame: full=receptor-interacting serine threonine-protein kinase 1 ame: full=cell death protein rip ame: full=receptor-interacting protein 1 short=rip-1 ame: full=serine threonine-protein kinase rip;GO:0002224=>toll-like receptor signaling pathway=>ripk1_human ame: full=receptor-interacting serine threonine-protein kinase 1 ame: fu…	PF07714=>Protein tyrosine kinase;	IPR011009 (Protein kinase-like domain)
RirG002620
RirG002630	65	65_2		PF05970=>PIF1-like helicase;	IPR010285 (DNA helicase PIF1, ATP-dependent)
RirG002640
RirG002650	11213	11213_1
RirG002660	12750	12750_1
RirG002670	3582	3582_1		PF08238=>Sel1 repeat;	IPR011990 (Tetratricopeptide-like helical)
RirG002680	1024	1024_1
RirG002690	14	14_3	GO:0004672=>protein kinase activity=>wakls_arath ame: full= wall-associated receptor kinase-like 16 flags: precursor;GO:0005488=>binding=>wakls_arath ame: full= wall-associated receptor kinase-like 16 flags: precursor;GO:0006952=>defense response=>wakls_arath ame: full= wall-associated receptor kinase-like 16 flags: precursor;GO:0007165=>signal transduction=>wakls_arath ame: full= wall-associated…	PF07714=>Protein tyrosine kinase;PF08238=>Sel1 repeat;	IPR011009 (Protein kinase-like domain; IPR011990 (Tetratricopeptide-like helical)
RirG002700	14910	14910_1
RirG002710	286	286_1
RirG002720	1451	1451_1	GO:0005739=>mitochondrion=>coae_bacc1 ame: full=dephospho- kinase ame: full=dephosphocoenzyme a kinase;GO:0016301=>kinase activity=>coae_bacc1 ame: full=dephospho- kinase ame: full=dephosphocoenzyme a kinase;GO:0044237=>cellular metabolic process=>coae_bacc1 ame: full=dephospho- kinase ame: full=dephosphocoenzyme a kinase);	PF01121=>Dephospho-CoA kinase;	IPR001977 (Dephospho-CoA kinase)
RirG002730	56	56_1	GO:0032502=>developmental process=>btbd2_human ame: full=btb poz domain-containing protein 2);	PF00651=>BTB/POZ domain;PF07534=>TLD;PF07707=>BTB And C-terminal Kelch;	IPR011333 (BTB/POZ fold; IPR013089 (Kelch-related)
RirG002740	885	885_1
RirG002750				PF10359=>RNA pol II promoter Fmp27 protein domain;	IPR019449 (Domain of unknown function FMP27, domain-5)
RirG002760	2481	2481_1
RirG002770	13	13_2	GO:0016301=>kinase activity=>y9955_dicdi ame: full=probable serine threonine-protein kinase ddb_g0267514);	PF07714=>Protein tyrosine kinase;	IPR011009 (Protein kinase-like domain)
RirG002780	13	13_2	GO:0002224=>toll-like receptor signaling pathway=>roco5_dicdi ame: full=probable serine threonine-protein kinase roco5 ame: full=ras of complex proteins and c-terminal of roc 5;GO:0004672=>protein kinase activity=>roco5_dicdi ame: full=probable serine threonine-protein kinase roco5 ame: full=ras of complex proteins and c-terminal of roc 5;GO:0005488=>binding=>roco5_dicdi ame: full=probable serine…	PF07714=>Protein tyrosine kinase;	IPR011009 (Protein kinase-like domain)
RirG002790	125	125_6
RirG002800	125	125_6
RirG002810	12754	12754_1		PF09405=>CASC3/Barentsz eIF4AIII binding;	IPR018545 (CASC3/Barentsz eIF4AIII binding)
RirG002820			GO:0004662=>CAAX-protein geranylgeranyltransferase activity=>pgtb1_human ame: full=geranylgeranyl transferase type-1 subunit beta ame: full=geranylgeranyl transferase type i subunit beta short=ggtase-i-beta ame: full=type i protein geranyl-geranyltransferase subunit beta;GO:0004663=>Rab geranylgeranyltransferase activity=>pgtb1_human ame: full=geranylgeranyl transferase type-1 subunit beta ame: f…	PF00432=>Prenyltransferase and squalene oxidase repeat;	IPR008930 (Terpenoid cylases/protein prenyltransferase alpha-alpha toroid)
RirG002830	189	189_1
RirG002840	14895	14895_1
RirG002850
RirG002860				PF05707=>Zonular occludens toxin (Zot);	IPR008900 (Zona occludens toxin)
RirG002870
RirG002880				PF01464=>Transglycosylase SLT domain;	IPR008258 (Lytic transglycosylase-like, catalytic)
RirG002890	14789	14789_1	GO:0006259=>DNA metabolic process=>tnr7_entfa ame: full=transposon tn917 resolvase);	PF00239=>Resolvase;N terminal domain;PF02796=>Helix-turn-helix domain of resolvase;	IPR006119 (Resolvase, N-terminal; IPR006120 (Resolvase, helix-turn-helix domain; IPR012287 (Homeodomain-related)
RirG002900
RirG002910
RirG002920
RirG002930
RirG002940			GO:0016787=>hydrolase activity=>gund_celfi ame: full=endoglucanase d ame: full=cellulase d ame: full=endo- -beta-glucanase d flags: precursor);	PF00041=>Fibronectin type III domain;	IPR008957 (Fibronectin type III domain; IPR013783 (Immunoglobulin-like fold)
RirG002950
RirG002960
RirG002970	94	94_2	GO:0000278=>mitotic cell cycle=>cdc27_bovin ame: full=cell division cycle protein 27 homolog;GO:0003008=>system process=>cdc27_bovin ame: full=cell division cycle protein 27 homolog;GO:0005515=>protein binding=>cdc27_bovin ame: full=cell division cycle protein 27 homolog;GO:0005634=>nucleus=>cdc27_bovin ame: full=cell division cycle protein 27 homolog;GO:0005813=>centrosome=>cdc27_bovin ame: full…		IPR011990 (Tetratricopeptide-like helical; IPR013083 (Zinc finger, RING/FYVE/PHD-type)
RirG002980				PF07714=>Protein tyrosine kinase;	IPR011009 (Protein kinase-like domain)
RirG002990			GO:0008233=>peptidase activity=>nm111_ajecn ame: full=pro-apoptotic serine protease nma111;GO:0009628=>response to abiotic stimulus=>nm111_ajecn ame: full=pro-apoptotic serine protease nma111;GO:0019538=>protein metabolic process=>nm111_ajecn ame: full=pro-apoptotic serine protease nma111;GO:0043231=>intracellular membrane-bounded organelle=>nm111_ajecn ame: full=pro-apoptotic serine protease nma…		IPR001478 (PDZ/DHR/GLGF)
RirG003000	25	25_2			IPR015915 (Kelch-type beta propeller)
RirG003010	11146	11146_1		PF00583=>Acetyltransferase (GNAT) family;	IPR016181 (Acyl-CoA N-acyltransferase)
RirG003020
RirG003030				PF02417=>Chromate transporter;	IPR003370 (Chromate transporter)
RirG003040	131	131_7
RirG003050	190	190_1
RirG003060	1584	1584_1
RirG003070	4613	4613_1	GO:0000186=>activation of MAPKK activity=>m3k7_rat ame: full=mitogen-activated protein kinase kinase kinase 7;GO:0000187=>activation of MAPK activity=>m3k7_rat ame: full=mitogen-activated protein kinase kinase kinase 7;GO:0001525=>angiogenesis=>m3k7_rat ame: full=mitogen-activated protein kinase kinase kinase 7;GO:0001841=>neural tube formation=>m3k7_rat ame: full=mitogen-activated protein kinase…	PF07714=>Protein tyrosine kinase;	IPR015786 (Mitogen activated protein kinase kinase kinase-related)
RirG003080	4177	4177_1			IPR011990 (Tetratricopeptide-like helical)
RirG003090	3639	3639_1	GO:0004532=>exoribonuclease activity=>exos6_danre ame: full=exosome complex component mtr3 ame: full=exosome component 6 ame: full=mrna transport regulator 3 homolog;GO:0005488=>binding=>exos6_danre ame: full=exosome complex component mtr3 ame: full=exosome component 6 ame: full=mrna transport regulator 3 homolog;GO:0006259=>DNA metabolic process=>exos6_danre ame: full=exosome complex component m…	PF01138=>3' exoribonuclease family;domain 1;	IPR015847 (Exoribonuclease, phosphorolytic domain 2; IPR020568 (Ribosomal protein S5 domain 2-type fold)
RirG003100	2285	2285_1	GO:0000062=>fatty-acyl-CoA binding=>hmgcl_bovin ame: full=hydroxymethylglutaryl- mitochondrial short=hl short=hmg- lyase ame: full=3-hydroxy-3-methylglutarate- lyase flags: precursor;GO:0000287=>magnesium ion binding=>hmgcl_bovin ame: full=hydroxymethylglutaryl- mitochondrial short=hl short=hmg- lyase ame: full=3-hydroxy-3-methylglutarate- lyase flags: precursor;GO:0001889=>liver development=>hmg…	PF00682=>HMGL-like;	IPR013785 (Aldolase-type TIM barrel)
RirG003110	2423	2423_1		PF00122=>E1-E2 ATPase;PF00689=>Cation transporting ATPase;C-terminus;PF12409=>P5-type ATPase cation transporter;	IPR000150 (Cof protein; IPR001757 (ATPase, P-type, K/Mg/Cd/Cu/Zn/Na/Ca/Na/H-transporter; IPR023214 (HAD-like domain; IPR023299 (ATPase, P-type, cytoplasmic domain N; IPR023300 (ATPase, P-type, cytoplasmic transduction domain A)
RirG003120	3355	3355_1
RirG003130	1818	1818_1	GO:0000049=>tRNA binding=>r35a2_arath ame: full=60s ribosomal protein l35a-2;GO:0000184=>nuclear-transcribed mRNA catabolic process, nonsense-mediated decay=>r35a2_arath ame: full=60s ribosomal protein l35a-2;GO:0003735=>structural constituent of ribosome=>r35a2_arath ame: full=60s ribosomal protein l35a-2;GO:0005739=>mitochondrion=>r35a2_arath ame: full=60s ribosomal protein l35a-2;GO:0006364=>r…	PF01247=>Ribosomal protein L35Ae;	IPR001780 (Ribosomal protein L35Ae; IPR009000 (Translation elongation/initiation factor/Ribosomal, beta-barrel)
RirG003140	783	783_1		PF00651=>BTB/POZ domain;	IPR008974 (TRAF-like; IPR011333 (BTB/POZ fold; IPR013089 (Kelch-related)
RirG003150	9047	9047_1
RirG003160
RirG003170
RirG003180	48	48_13
RirG003190	12856	12856_1	GO:0005634=>nucleus=>byst_monbe ame: full=bystin);	PF05291=>Bystin;	IPR007955 (Bystin)
RirG003200	29	29_3
RirG003210			GO:0000023=>maltose metabolic process=>glgb_gloin ame: full= -alpha-glucan-branching enzyme ame: full=glycogen-branching enzyme;GO:0000272=>polysaccharide catabolic process=>glgb_gloin ame: full= -alpha-glucan-branching enzyme ame: full=glycogen-branching enzyme;GO:0003844=>1,4-alpha-glucan branching enzyme activity=>glgb_gloin ame: full= -alpha-glucan-branching enzyme ame: full=glycogen-branchin…	PF02806=>Alpha amylase;C-terminal all-beta domain;	IPR013780 (Glycosyl hydrolase, family 13, all-beta)
RirG003220	6574	6574_1
RirG003230
RirG003240	60	60_2	GO:0004713=>protein tyrosine kinase activity=>limkb_dicdi ame: full=probable lim domain-containing serine threonine-protein kinase ddb_g0286997;GO:0005515=>protein binding=>limkb_dicdi ame: full=probable lim domain-containing serine threonine-protein kinase ddb_g0286997;GO:0005737=>cytoplasm=>limkb_dicdi ame: full=probable lim domain-containing serine threonine-protein kinase ddb_g0286997;GO:0006…	PF07714=>Protein tyrosine kinase;	IPR011009 (Protein kinase-like domain)
RirG003250	5237	5237_1		PF00069=>Protein kinase domain;	IPR011009 (Protein kinase-like domain)
RirG003260	13	13_11	GO:0000075=>cell cycle checkpoint=>m3k12_human ame: full=mitogen-activated protein kinase kinase kinase 12 ame: full=dual leucine zipper bearing kinase short=dlk ame: full=leucine-zipper protein kinase short=zpk ame: full=mapk-upstream kinase short=muk ame: full=mixed lineage kinase;GO:0000166=>nucleotide binding=>m3k12_human ame: full=mitogen-activated protein kinase kinase kinase 12 ame: full=d…	PF07714=>Protein tyrosine kinase;PF08238=>Sel1 repeat;	IPR011009 (Protein kinase-like domain; IPR011028 (Cyclin-like; IPR011990 (Tetratricopeptide-like helical)
RirG003270
RirG003280
RirG003290	9096	9096_1
RirG003300				PF10347=>RNA pol II promoter Fmp27 protein domain;	IPR019441 (Domain of unknown function FMP27, domain-4)
RirG003310	2210	2210_1	GO:0005488=>binding=>aro1_thacu ame: full=pentafunctional arom polypeptide includes: ame: full=3-dehydroquinate synthase short=dhqs includes: ame: full=3-phosphoshikimate 1-carboxyvinyltransferase ame: full=5-enolpyruvylshikimate-3-phosphate synthase short=epsp synthase short=epsps includes: ame: full=shikimate kinase short=sk includes: ame: full=3-dehydroquinate dehydratase short=3-dehydroquinas…	PF01487=>Type I 3-dehydroquinase;	IPR013785 (Aldolase-type TIM barrel)
RirG003320
RirG003330	361	361_1		PF08241=>Methyltransferase domain;	IPR013216 (Methyltransferase type 11)
RirG003340	224	224_1	GO:0005515=>protein binding=>ud16_mouse ame: full=udp-glucuronosyltransferase 1-6 short=udpgt 1-6 short=ugt1*6 short=ugt1-06 short= ame: full=phenol udp-glucuronosyltransferase ame: full=udp-glucuronosyltransferase 1a6 short=ugt1a6 ame: full=ugp1a1 ame: full=ugt1a7 flags: precursor;GO:0006805=>xenobiotic metabolic process=>ud16_mouse ame: full=udp-glucuronosyltransferase 1-6 short=udpgt 1-6 short…	PF00201=>UDP-glucoronosyl and UDP-glucosyl transferase;	IPR002213 (UDP-glucuronosyl/UDP-glucosyltransferase)
RirG003350	224	224_1	GO:0005488=>binding=>udb17_human ame: full=udp-glucuronosyltransferase 2b17 short=udpgt 2b17 ame: full=c19-steroid-specific udp-glucuronosyltransferase short=c19-steroid-specific udpgt flags: precursor;GO:0008202=>steroid metabolic process=>udb17_human ame: full=udp-glucuronosyltransferase 2b17 short=udpgt 2b17 ame: full=c19-steroid-specific udp-glucuronosyltransferase short=c19-steroid-specific …	PF00201=>UDP-glucoronosyl and UDP-glucosyl transferase;	IPR002213 (UDP-glucuronosyl/UDP-glucosyltransferase)
RirG003360			GO:0006811=>ion transport=>vatl_cantr ame: full=v-type proton atpase 16 kda proteolipid subunit short=v-atpase 16 kda proteolipid subunit ame: full=vacuolar proton pump 16 kda proteolipid subunit;GO:0044425=>membrane part=>vatl_cantr ame: full=v-type proton atpase 16 kda proteolipid subunit short=v-atpase 16 kda proteolipid subunit ame: full=vacuolar proton pump 16 kda proteolipid subunit);	PF00137=>ATP synthase subunit C;	IPR002379 (ATPase, F0/V0 complex, subunit C)
RirG003370	5838	5838_1
RirG003380
RirG003390	7	7_3	GO:0002224=>toll-like receptor signaling pathway=>y1136_arath ame: full=g-type lectin s-receptor-like serine threonine-protein kinase at1g61360 flags: precursor;GO:0004672=>protein kinase activity=>y1136_arath ame: full=g-type lectin s-receptor-like serine threonine-protein kinase at1g61360 flags: precursor;GO:0005515=>protein binding=>y1136_arath ame: full=g-type lectin s-receptor-like serine th…	PF07714=>Protein tyrosine kinase;	IPR011009 (Protein kinase-like domain)
RirG003400	14826	14826_1	GO:0005515=>protein binding=>aka7g_human ame: full=a-kinase anchor protein 7 isoform gamma short=akap-7 isoform gamma ame: full=a-kinase anchor protein 18 kda short=akap 18 ame: full=protein kinase a-anchoring protein 7 isoform gamma short=prka7 isoform gamma;GO:0043231=>intracellular membrane-bounded organelle=>aka7g_human ame: full=a-kinase anchor protein 7 isoform gamma short=akap-7 isoform ga…	PF10469=>AKAP7 2'5' RNA ligase-like domain;	IPR009097 (RNA ligase/cyclic nucleotide phosphodiesterase)
RirG003410	4914	4914_1		PF00505=>HMG (high mobility group) box;	IPR009071 (High mobility group, superfamily)
RirG003420	11834	11834_1			IPR001763 (Rhodanese-like)
RirG003430	22	22_3	GO:0002224=>toll-like receptor signaling pathway=>limk1_mouse ame: full=lim domain kinase 1 short=limk-1 ame: full=kiz-1;GO:0004674=>protein serine/threonine kinase activity=>limk1_mouse ame: full=lim domain kinase 1 short=limk-1 ame: full=kiz-1;GO:0005515=>protein binding=>limk1_mouse ame: full=lim domain kinase 1 short=limk-1 ame: full=kiz-1;GO:0005886=>plasma membrane=>limk1_mouse ame: full=li…	PF00069=>Protein kinase domain;	IPR011009 (Protein kinase-like domain)
RirG003440	77	77_1	GO:0000974=>Prp19 complex=>hsp72_schpo ame: full=probable heat shock protein ssa2;GO:0005102=>receptor binding=>hsp72_schpo ame: full=probable heat shock protein ssa2;GO:0005524=>ATP binding=>hsp72_schpo ame: full=probable heat shock protein ssa2;GO:0005730=>nucleolus=>hsp72_schpo ame: full=probable heat shock protein ssa2;GO:0005829=>cytosol=>hsp72_schpo ame: full=probable heat shock protein ssa…	PF00012=>Hsp70 protein;	IPR001023 (Heat shock protein Hsp70)
RirG003450	1	1_1
RirG003460	1	1_1
RirG003470	77	77_1	GO:0000974=>Prp19 complex=>hsp72_parba ame: full=heat shock 70 kda protein 2;GO:0005102=>receptor binding=>hsp72_parba ame: full=heat shock 70 kda protein 2;GO:0005524=>ATP binding=>hsp72_parba ame: full=heat shock 70 kda protein 2;GO:0005681=>spliceosomal complex=>hsp72_parba ame: full=heat shock 70 kda protein 2;GO:0005730=>nucleolus=>hsp72_parba ame: full=heat shock 70 kda protein 2;GO:0005829…	PF00012=>Hsp70 protein;	IPR001023 (Heat shock protein Hsp70)
RirG003480	14983	14983_1
RirG003490	6564	6564_1
RirG003500
RirG003510	164	164_1	GO:0004497=>monooxygenase activity=>c72a1_catro ame: full=secologanin synthase short=sls ame: full=cyplxxii ame: full=cytochrome p450 72a1;GO:0005488=>binding=>c72a1_catro ame: full=secologanin synthase short=sls ame: full=cyplxxii ame: full=cytochrome p450 72a1;GO:0006725=>cellular aromatic compound metabolic process=>c72a1_catro ame: full=secologanin synthase short=sls ame: full=cyplxxii ame: f…	PF00067=>Cytochrome P450;	IPR001128 (Cytochrome P450)
RirG003520			GO:0005488=>binding=>peg10_human ame: full=retrotransposon-derived protein peg10 ame: full=embryonal carcinoma differentiation-regulated protein ame: full=mammalian retrotransposon-derived protein 2 ame: full=myelin expression factor 3-like protein 1 short=mef3-like protein 1 ame: full=paternally expressed gene 10 protein ame: full=retrotransposon gag domain-containing protein 3 ame: full=retrotr…	PF03732=>Retrotransposon gag protein ;	IPR005162 (Retrotransposon gag protein)
RirG003530	14954	14954_1
RirG003540	11977	11977_1	GO:0000118=>histone deacetylase complex=>apha_mycra ame: full=acetylpolyamine aminohydrolase;GO:0000790=>nuclear chromatin=>apha_mycra ame: full=acetylpolyamine aminohydrolase;GO:0003677=>DNA binding=>apha_mycra ame: full=acetylpolyamine aminohydrolase;GO:0003682=>chromatin binding=>apha_mycra ame: full=acetylpolyamine aminohydrolase;GO:0004407=>histone deacetylase activity=>apha_mycra ame: full=…	PF00850=>Histone deacetylase domain;	IPR000286 (Histone deacetylase superfamily)
RirG003550				PF02892=>BED zinc finger;	IPR003656 (Zinc finger, BED-type predicted)
RirG003560	4038	4038_1
RirG003570	8	8_23	GO:0006915=>apoptotic process=>ybeq_ecoli ame: full=uncharacterized protein;GO:0043231=>intracellular membrane-bounded organelle=>ybeq_ecoli ame: full=uncharacterized protein;GO:0044444=>cytoplasmic part=>ybeq_ecoli ame: full=uncharacterized protein;GO:0050789=>regulation of biological process=>ybeq_ecoli ame: full=uncharacterized protein);	PF08238=>Sel1 repeat;	IPR011990 (Tetratricopeptide-like helical)
RirG003580
RirG003590	214	214_1
RirG003600	26	26_8
RirG003610	1	1_74
RirG003620	2913	2913_1	GO:0000103=>sulfate assimilation=>met3_phano ame: full=sulfate adenylyltransferase ame: full=atp-sulfurylase ame: full=sulfate adenylate transferase short=sat;GO:0004020=>adenylylsulfate kinase activity=>met3_phano ame: full=sulfate adenylyltransferase ame: full=atp-sulfurylase ame: full=sulfate adenylate transferase short=sat;GO:0004781=>sulfate adenylyltransferase (ATP) activity=>met3_phano ame…	PF01583=>Adenylylsulphate kinase;PF01747=>ATP-sulfurylase;	IPR002650 (Sulphate adenylyltransferase; IPR002891 (Adenylylsulphate kinase, C-terminal)
RirG003630	57	57_5		PF08238=>Sel1 repeat;	IPR011990 (Tetratricopeptide-like helical)
RirG003640	2853	2853_1
RirG003650	6883	6883_1	GO:0000956=>nuclear-transcribed mRNA catabolic process=>znfx1_human ame: full=nfx1-type zinc finger-containing protein 1;GO:0005488=>binding=>znfx1_human ame: full=nfx1-type zinc finger-containing protein 1;GO:0010467=>gene expression=>znfx1_human ame: full=nfx1-type zinc finger-containing protein 1;GO:0016787=>hydrolase activity=>znfx1_human ame: full=nfx1-type zinc finger-containing protein 1;G…
RirG003660	2109	2109_1	GO:0000003=>reproduction=>ppme1_bovin ame: full=protein phosphatase methylesterase 1 short=pme-1;GO:0002119=>nematode larval development=>ppme1_bovin ame: full=protein phosphatase methylesterase 1 short=pme-1;GO:0006482=>protein demethylation=>ppme1_bovin ame: full=protein phosphatase methylesterase 1 short=pme-1;GO:0008340=>determination of adult lifespan=>ppme1_bovin ame: full=protein phosphata…	PF00561=>alpha/beta hydrolase fold;	IPR000073 (Alpha/beta hydrolase fold-1)
RirG003670	10116	10116_1
RirG003680	149	149_1	GO:0003824=>catalytic activity=>mybx_dicdi ame: full=myb-like protein x;GO:0005488=>binding=>mybx_dicdi ame: full=myb-like protein x;GO:0005654=>nucleoplasm=>mybx_dicdi ame: full=myb-like protein x;GO:0005737=>cytoplasm=>mybx_dicdi ame: full=myb-like protein x;GO:0005856=>cytoskeleton=>mybx_dicdi ame: full=myb-like protein x;GO:0007275=>multicellular organismal development=>mybx_dicdi ame: full=m…
RirG003690	25	25_15	GO:0003824=>catalytic activity=>rngb_dicdi ame: full=ring finger protein b short=protein rngb;GO:0005737=>cytoplasm=>rngb_dicdi ame: full=ring finger protein b short=protein rngb;GO:0010468=>regulation of gene expression=>rngb_dicdi ame: full=ring finger protein b short=protein rngb;GO:0031323=>regulation of cellular metabolic process=>rngb_dicdi ame: full=ring finger protein b short=protein rngb…	PF01344=>Kelch motif;	IPR015915 (Kelch-type beta propeller)
RirG003700	3045	3045_1
RirG003710	452	452_1
RirG003720
RirG003730	452	452_1	GO:0004674=>protein serine/threonine kinase activity=>vwka_dicdi ame: full=alpha-protein kinase vwka ame: full=von willebrand factor a alpha-kinase short=vwf kinase;GO:0005261=>cation channel activity=>vwka_dicdi ame: full=alpha-protein kinase vwka ame: full=von willebrand factor a alpha-kinase short=vwf kinase;GO:0005886=>plasma membrane=>vwka_dicdi ame: full=alpha-protein kinase vwka ame: full=…	PF02816=>Alpha-kinase family;	IPR011009 (Protein kinase-like domain)
RirG003740	675	675_1
RirG003750	3215	3215_1
RirG003760			GO:0003676=>nucleic acid binding=>orn_mycss ame: full=oligoribonuclease;GO:0005730=>nucleolus=>orn_mycss ame: full=oligoribonuclease;GO:0005739=>mitochondrion=>orn_mycss ame: full=oligoribonuclease;GO:0005886=>plasma membrane=>orn_mycss ame: full=oligoribonuclease;GO:0006401=>RNA catabolic process=>orn_mycss ame: full=oligoribonuclease;GO:0008408=>3'-5' exonuclease activity=>orn_mycss ame: full=o…	PF00929=>Exonuclease;	IPR012337 (Ribonuclease H-like)
RirG003770
RirG003780	15021	15021_1		PF01753=>MYND finger;	IPR002893 (Zinc finger, MYND-type)
RirG003790	8	8_7	GO:0000166=>nucleotide binding=>y9957_dicdi ame: full=probable serine threonine-protein kinase ddb_g0276181;GO:0000186=>activation of MAPKK activity=>y9957_dicdi ame: full=probable serine threonine-protein kinase ddb_g0276181;GO:0001819=>positive regulation of cytokine production=>y9957_dicdi ame: full=probable serine threonine-protein kinase ddb_g0276181;GO:0002224=>toll-like receptor signaling …	PF07714=>Protein tyrosine kinase;	IPR020685 (Tyrosine-protein kinase)
RirG003800
RirG003810			GO:0000139=>Golgi membrane=>vps45_rat ame: full=vacuolar protein sorting-associated protein 45 short=rvps45;GO:0005515=>protein binding=>vps45_rat ame: full=vacuolar protein sorting-associated protein 45 short=rvps45;GO:0006886=>intracellular protein transport=>vps45_rat ame: full=vacuolar protein sorting-associated protein 45 short=rvps45;GO:0007596=>blood coagulation=>vps45_rat ame: full=vacuol…	PF00995=>Sec1 family;	IPR001619 (Sec1-like protein)
RirG003820	60	60_2	GO:0000166=>nucleotide binding=>y0138_dicdi ame: full=probable serine threonine-protein kinase ddb_g0278509;GO:0000278=>mitotic cell cycle=>y0138_dicdi ame: full=probable serine threonine-protein kinase ddb_g0278509;GO:0004713=>protein tyrosine kinase activity=>y0138_dicdi ame: full=probable serine threonine-protein kinase ddb_g0278509;GO:0006468=>protein phosphorylation=>y0138_dicdi ame: full=pr…	PF07714=>Protein tyrosine kinase;	IPR011009 (Protein kinase-like domain)
RirG003830	6930	6930_1
RirG003840	11199	11199_1
RirG003850			GO:0002119=>nematode larval development=>clh1_bovin ame: full=clathrin heavy chain 1;GO:0004871=>signal transducer activity=>clh1_bovin ame: full=clathrin heavy chain 1;GO:0005198=>structural molecule activity=>clh1_bovin ame: full=clathrin heavy chain 1;GO:0005515=>protein binding=>clh1_bovin ame: full=clathrin heavy chain 1;GO:0005739=>mitochondrion=>clh1_bovin ame: full=clathrin heavy chain 1;…	PF00637=>Region in Clathrin and VPS;	IPR011990 (Tetratricopeptide-like helical; IPR016024 (Armadillo-type fold)
RirG003860
RirG003870	1058	1058_1	GO:0000083=>regulation of transcription involved in G1/S phase of mitotic cell cycle=>rir2_neucr ame: full=ribonucleoside-diphosphate reductase small chain ame: full=ribonucleotide reductase small subunit;GO:0001822=>kidney development=>rir2_neucr ame: full=ribonucleoside-diphosphate reductase small chain ame: full=ribonucleotide reductase small subunit;GO:0003014=>renal system process=>rir2_neuc…	PF00268=>Ribonucleotide reductase;small chain;	IPR000358 (Ribonucleotide reductase; IPR009078 (Ferritin/ribonucleotide reductase-like)
RirG003880	3284	3284_1	GO:0004221=>ubiquitin thiolesterase activity=>ept1_schpo ame: full=ring finger protein etp1 homolog ame: full=brap2 homolog;GO:0004843=>ubiquitin-specific protease activity=>ept1_schpo ame: full=ring finger protein etp1 homolog ame: full=brap2 homolog;GO:0005515=>protein binding=>ept1_schpo ame: full=ring finger protein etp1 homolog ame: full=brap2 homolog;GO:0005634=>nucleus=>ept1_schpo ame: ful…	PF02148=>Zn-finger in ubiquitin-hydrolases and other protein;	IPR001607 (Zinc finger, UBP-type; IPR001841 (Zinc finger, RING-type; IPR013083 (Zinc finger, RING/FYVE/PHD-type)
RirG003890
RirG003900	4922	4922_1	GO:0000775=>chromosome, centromeric region=>dad4_schpo ame: full=dash complex subunit dad4 ame: full=outer kinetochore protein dad4;GO:0005856=>cytoskeleton=>dad4_schpo ame: full=dash complex subunit dad4 ame: full=outer kinetochore protein dad4;GO:0009987=>cellular process=>dad4_schpo ame: full=dash complex subunit dad4 ame: full=outer kinetochore protein dad4;GO:0043234=>protein complex=>dad4_s…	PF08650=>DASH complex subunit Dad4;	IPR013959 (DASH complex, subunit Dad4)
RirG003910	9032	9032_1
RirG003920	7879	7879_1
RirG003930	2417	2417_1	GO:0006811=>ion transport=>spxs1_dicdi ame: full=spx and exs domain-containing protein 1;GO:0016020=>membrane=>spxs1_dicdi ame: full=spx and exs domain-containing protein 1;GO:0043231=>intracellular membrane-bounded organelle=>spxs1_dicdi ame: full=spx and exs domain-containing protein 1;GO:0050896=>response to stimulus=>spxs1_dicdi ame: full=spx and exs domain-containing protein 1);	PF03124=>EXS family;	IPR004342 (EXS, C-terminal)
RirG003940	6885	6885_1
RirG003950	1	1_62
RirG003960	1414	1414_1
RirG003970
RirG003980	7398	7398_1
RirG003990	9077	9077_1
RirG004000	69	69_1	GO:0005488=>binding=>cp3a8_macfa ame: full=cytochrome p450 3a8 ame: full=cypiiia8 ame: full=cytochrome p-450-mk2 ame: full=cytochrome p450-mknf2;GO:0008202=>steroid metabolic process=>cp3a8_macfa ame: full=cytochrome p450 3a8 ame: full=cypiiia8 ame: full=cytochrome p-450-mk2 ame: full=cytochrome p450-mknf2;GO:0008395=>steroid hydroxylase activity=>cp3a8_macfa ame: full=cytochrome p450 3a8 ame: fu…	PF00067=>Cytochrome P450;	IPR001128 (Cytochrome P450)
RirG004010	12788	12788_1	GO:0005488=>binding=>syim_schpo ame: full=isoleucine--trna mitochondrial ame: full=isoleucyl-trna synthetase short=;GO:0006412=>translation=>syim_schpo ame: full=isoleucine--trna mitochondrial ame: full=isoleucyl-trna synthetase short=;GO:0016874=>ligase activity=>syim_schpo ame: full=isoleucine--trna mitochondrial ame: full=isoleucyl-trna synthetase short=);	PF00133=>tRNA synthetases class I (I;L, M and V);	IPR002301 (Isoleucyl-tRNA synthetase, class Ia)
RirG004020	4350	4350_1	GO:0005634=>nucleus=>apn2_schpo ame: full=dna-(apurinic or apyrimidinic site) lyase 2 ame: full=ap endonuclease 2 ame: full=apurinic-apyrimidinic endonuclease 2;GO:0005743=>mitochondrial inner membrane=>apn2_schpo ame: full=dna-(apurinic or apyrimidinic site) lyase 2 ame: full=ap endonuclease 2 ame: full=apurinic-apyrimidinic endonuclease 2;GO:0009987=>cellular process=>apn2_schpo ame: full=dna-(…	PF03372=>Endonuclease/Exonuclease/phosphatase family;PF06839=>GRF zinc finger;	IPR005135 (Endonuclease/exonuclease/phosphatase; IPR010666 (Zinc finger, GRF-type)
RirG004030	14960	14960_1	GO:0000724=>double-strand break repair via homologous recombination=>swi5_human ame: full=dna repair protein swi5 homolog ame: full=hbv dnaptp1-transactivated protein a ame: full=protein sae3 homolog;GO:0005515=>protein binding=>swi5_human ame: full=dna repair protein swi5 homolog ame: full=hbv dnaptp1-transactivated protein a ame: full=protein sae3 homolog;GO:0032798=>Swi5-Sfr1 complex=>swi5_hum…	PF07061=>Swi5;	IPR010760 (DNA repair protein, Swi5)
RirG004040	14834	14834_1		PF00239=>Resolvase;N terminal domain;	IPR006119 (Resolvase, N-terminal)
RirG004050	14834	14834_1		PF00239=>Resolvase;N terminal domain;	IPR006119 (Resolvase, N-terminal)
RirG004060			GO:0003743=>translation initiation factor activity=>if4a_phano ame: full=atp-dependent rna helicase eif4a ame: full=eukaryotic initiation factor 4a short=eif-4a ame: full=translation initiation factor 1;GO:0005524=>ATP binding=>if4a_phano ame: full=atp-dependent rna helicase eif4a ame: full=eukaryotic initiation factor 4a short=eif-4a ame: full=translation initiation factor 1;GO:0005737=>cytoplas…	PF00270=>DEAD/DEAH box helicase;PF00271=>Helicase conserved C-terminal domain;	IPR001650 (Helicase, C-terminal; IPR014021 (Helicase, superfamily 1/2, ATP-binding domain)
RirG004070	2111	2111_1	GO:0004844=>uracil DNA N-glycosylase activity=>ung_mouse ame: full=uracil-dna glycosylase short=udg;GO:0005634=>nucleus=>ung_mouse ame: full=uracil-dna glycosylase short=udg;GO:0005737=>cytoplasm=>ung_mouse ame: full=uracil-dna glycosylase short=udg;GO:0006284=>base-excision repair=>ung_mouse ame: full=uracil-dna glycosylase short=udg);	PF03167=>Uracil DNA glycosylase superfamily;	IPR005122 (Uracil-DNA glycosylase-like)
RirG004080	2111	2111_1	GO:0004844=>uracil DNA N-glycosylase activity=>ung_schpo ame: full=uracil-dna glycosylase short=udg;GO:0005737=>cytoplasm=>ung_schpo ame: full=uracil-dna glycosylase short=udg;GO:0006284=>base-excision repair=>ung_schpo ame: full=uracil-dna glycosylase short=udg;GO:0043231=>intracellular membrane-bounded organelle=>ung_schpo ame: full=uracil-dna glycosylase short=udg);	PF03167=>Uracil DNA glycosylase superfamily;	IPR005122 (Uracil-DNA glycosylase-like)
RirG004090	6050	6050_1		PF03980=>Nnf1 ;	IPR007128 (Nnf1)
RirG004100	8975	8975_1	GO:0000139=>Golgi membrane=>pipna_bovin ame: full=phosphatidylinositol transfer protein alpha isoform short=pi-tp-alpha short= ns transfer protein alpha short= nstp alpha ame: full=phosphatidylinositol-transfer protein 35 kda isoform short=pi-tp 35 kda isoform;GO:0005789=>endoplasmic reticulum membrane=>pipna_bovin ame: full=phosphatidylinositol transfer protein alpha isoform short=pi-tp-alpha sh…	PF02121=>Phosphatidylinositol transfer protein;	IPR001666 (Phosphatidylinositol transfer protein)
RirG004110	6027	6027_1	GO:0000139=>Golgi membrane=>kisha_human ame: full=protein kish-a flags: precursor;GO:0016021=>integral to membrane=>kisha_human ame: full=protein kish-a flags: precursor);	PF06842=>Protein of unknown function (DUF1242);	IPR009653 (Protein of unknown function DUF1242)
RirG004120	2626	2626_1	GO:0000278=>mitotic cell cycle=>dyna_neucr ame: full= 150 kda isoform ame: full=150 kda dynein-associated polypeptide short=dap-150 short=dp-150 ame: full=p150-glued;GO:0001934=>positive regulation of protein phosphorylation=>dyna_neucr ame: full= 150 kda isoform ame: full=150 kda dynein-associated polypeptide short=dap-150 short=dp-150 ame: full=p150-glued;GO:0005802=>trans-Golgi network=>dyna_n…	PF01302=>CAP-Gly domain;PF12455=>Dynein associated protein ;	IPR000938 (Cytoskeleton-associated protein, Gly-rich domain; IPR022157 (Dynein associated protein; IPR023092 (Cytoskeleton-associated protein, Gly-rich conserved site)
RirG004130	6106	6106_1			IPR000261 (EPS15 homology (EH))
RirG004140	16	16_41		PF10551=>MULE transposase domain;	IPR018289 (MULE transposase, conserved domain)
RirG004150	11199	11199_1			IPR020685 (Tyrosine-protein kinase)
RirG004160	14847	14847_1
RirG004170	6101	6101_1	GO:0009987=>cellular process=>ybeq_ecoli ame: full=uncharacterized protein;GO:0043231=>intracellular membrane-bounded organelle=>ybeq_ecoli ame: full=uncharacterized protein;GO:0044444=>cytoplasmic part=>ybeq_ecoli ame: full=uncharacterized protein);	PF08238=>Sel1 repeat;	IPR011990 (Tetratricopeptide-like helical)
RirG004180
RirG004190	1	1_27
RirG004200	26	26_1
RirG004210	1238	1238_1
RirG004220	14985	14985_1		PF00397=>WW domain;	IPR001202 (WW/Rsp5/WWP)
RirG004230	5518	5518_1		PF10334=>Protein of unknown function (DUF2421);	IPR018820 (Brefeldin A sensitivity protein-related, domain of unknown function DUF2421)
RirG004240	6107	6107_1			IPR017930 (HTH transcriptional regulator, Myb-type, DNA-binding)
RirG004250	14867	14867_1
RirG004260	54	54_6
RirG004270			GO:0000226=>microtubule cytoskeleton organization=>g3p2_agabi ame: full=glyceraldehyde-3-phosphate dehydrogenase 2 short=gapdh 2;GO:0004365=>glyceraldehyde-3-phosphate dehydrogenase (NAD+) (phosphorylating) activity=>g3p2_agabi ame: full=glyceraldehyde-3-phosphate dehydrogenase 2 short=gapdh 2;GO:0005634=>nucleus=>g3p2_agabi ame: full=glyceraldehyde-3-phosphate dehydrogenase 2 short=gapdh 2;GO:00…	PF00044=>Glyceraldehyde 3-phosphate dehydrogenase;NAD binding domain;	IPR020831 (Glyceraldehyde/Erythrose phosphate dehydrogenase family)
RirG004280	90	90_1
RirG004290	6	6_1		PF00651=>BTB/POZ domain;PF07534=>TLD;	IPR011333 (BTB/POZ fold; IPR013089 (Kelch-related)
RirG004300
RirG004310			GO:0001944=>vasculature development=>met30_yeast ame: full=f-box protein met30 ame: full=e3 ubiquitin ligase complex scf subunit met30 ame: full=methionine-requiring protein 30;GO:0003700=>sequence-specific DNA binding transcription factor activity=>met30_yeast ame: full=f-box protein met30 ame: full=e3 ubiquitin ligase complex scf subunit met30 ame: full=methionine-requiring protein 30;GO:000452…	PF00400=>WD domain;G-beta repeat;	IPR011047 (Quinonprotein alcohol dehydrogenase-like; IPR015943 (WD40/YVTN repeat-like-containing domain)
RirG004320	8	8_9	GO:0009987=>cellular process=>ybeq_ecoli ame: full=uncharacterized protein;GO:0050896=>response to stimulus=>ybeq_ecoli ame: full=uncharacterized protein);	PF07714=>Protein tyrosine kinase;PF08238=>Sel1 repeat;	IPR011009 (Protein kinase-like domain; IPR011990 (Tetratricopeptide-like helical)
RirG004330	317	317_1
RirG004340	9	9_3
RirG004350	13	13_1	GO:0002376=>immune system process=>rcka_dicdi ame: full=rgs domain-containing serine threonine-protein kinase a ame: full=rgs domain-containing serine threonine-protein kinase 1;GO:0004672=>protein kinase activity=>rcka_dicdi ame: full=rgs domain-containing serine threonine-protein kinase a ame: full=rgs domain-containing serine threonine-protein kinase 1;GO:0005102=>receptor binding=>rcka_dicdi …	PF07714=>Protein tyrosine kinase;	IPR011009 (Protein kinase-like domain)
RirG004360	1	1_1
RirG004370			GO:0001975=>response to amphetamine=>trdmt_human ame: full=trna (cytosine -c )-methyltransferase ame: full=dna (cytosine-5)-methyltransferase-like protein 2 short=dnmt2 ame: full=dna methyltransferase homolog short=dna mtase homolog short= ame: full= et;GO:0006306=>DNA methylation=>trdmt_human ame: full=trna (cytosine -c )-methyltransferase ame: full=dna (cytosine-5)-methyltransferase-like protei…	PF00145=>C-5 cytosine-specific DNA methylase;	IPR001525 (C-5 cytosine methyltransferase)
RirG004380	12842	12842_1
RirG004390	12850	12850_1
RirG004400
RirG004410	4938	4938_1
RirG004420	17224	17224_1
RirG004430	10179	10179_1	GO:0003954=>NADH dehydrogenase activity=>ndua9_dicdi ame: full=nadh dehydrogenase 1 alpha subcomplex subunit mitochondrial flags: precursor;GO:0005488=>binding=>ndua9_dicdi ame: full=nadh dehydrogenase 1 alpha subcomplex subunit mitochondrial flags: precursor;GO:0005743=>mitochondrial inner membrane=>ndua9_dicdi ame: full=nadh dehydrogenase 1 alpha subcomplex subunit mitochondrial flags: precurso…	PF01370=>NAD dependent epimerase/dehydratase family;	IPR001509 (NAD-dependent epimerase/dehydratase)
RirG004440	7	7_2	GO:0000165=>MAPK cascade=>pats1_dicdi ame: full=probable serine threonine-protein kinase pats1 ame: full=protein associated with the transduction of signal 1;GO:0004672=>protein kinase activity=>pats1_dicdi ame: full=probable serine threonine-protein kinase pats1 ame: full=protein associated with the transduction of signal 1;GO:0005488=>binding=>pats1_dicdi ame: full=probable serine threonine-pro…	PF00069=>Protein kinase domain;	IPR011009 (Protein kinase-like domain)
RirG004450	204	204_1
RirG004460
RirG004470
RirG004480	5247	5247_1
RirG004490	2091	2091_1	GO:0004175=>endopeptidase activity=>ptrb_ecoli ame: full=protease 2 ame: full=oligopeptidase b ame: full=protease ii;GO:0005488=>binding=>ptrb_ecoli ame: full=protease 2 ame: full=oligopeptidase b ame: full=protease ii;GO:0008152=>metabolic process=>ptrb_ecoli ame: full=protease 2 ame: full=oligopeptidase b ame: full=protease ii;GO:0043231=>intracellular membrane-bounded organelle=>ptrb_ecoli ame…	PF00326=>Prolyl oligopeptidase family;	IPR002470 (Peptidase S9A, prolyl oligopeptidase)
RirG004500
RirG004510
RirG004520	6878	6878_1		PF05699=>hAT family dimerisation domain;	IPR008906 (HAT dimerisation; IPR012337 (Ribonuclease H-like)
RirG004530	6550	6550_1
RirG004540	6574	6574_1
RirG004550	6574	6574_1
RirG004560				PF06412=>Conjugal transfer protein TraD;	IPR009444 (Conjugal transfer, TraD, alpha-type)
RirG004570	6891	6891_1	GO:0003824=>catalytic activity=>rlx1_salty ame: full=43 kda relaxation protein;GO:0097159=>organic cyclic compound binding=>rlx1_salty ame: full=43 kda relaxation protein;GO:1901363=>heterocyclic compound binding=>rlx1_salty ame: full=43 kda relaxation protein);	PF03389=>MobA/MobL family;	IPR005053 (MobA/MobL protein)
RirG004580
RirG004590
RirG004600
RirG004610
RirG004620	6550	6550_1
RirG004630	5242	5242_1		PF00069=>Protein kinase domain;	IPR011009 (Protein kinase-like domain)
RirG004640	6932	6932_1			IPR012287 (Homeodomain-related)
RirG004650	288	288_1
RirG004660	29	29_2
RirG004670	14863	14863_1
RirG004680	739	739_1
RirG004690	1100	1100_1
RirG004700	2477	2477_1		PF08238=>Sel1 repeat;	IPR011990 (Tetratricopeptide-like helical)
RirG004710	1	1_108
RirG004720	10141	10141_1	GO:0009987=>cellular process=>ce120_xentr ame: full=centrosomal protein of 120 kda short=cep120 ame: full=coiled-coil domain-containing protein 100;GO:0044424=>intracellular part=>ce120_xentr ame: full=centrosomal protein of 120 kda short=cep120 ame: full=coiled-coil domain-containing protein 100);
RirG004730
RirG004740	57	57_3	GO:0006915=>apoptotic process=>ybeq_ecoli ame: full=uncharacterized protein;GO:0043231=>intracellular membrane-bounded organelle=>ybeq_ecoli ame: full=uncharacterized protein;GO:0044444=>cytoplasmic part=>ybeq_ecoli ame: full=uncharacterized protein;GO:0050789=>regulation of biological process=>ybeq_ecoli ame: full=uncharacterized protein);	PF08238=>Sel1 repeat;	IPR011990 (Tetratricopeptide-like helical)
RirG004750	6555	6555_1		PF07714=>Protein tyrosine kinase;	IPR015786 (Mitogen activated protein kinase kinase kinase-related)
RirG004760	15055	15055_1
RirG004770	149	149_1
RirG004780	26	26_1
RirG004790	26	26_24
RirG004800	35	35_1
RirG004810	6	6_1		PF00651=>BTB/POZ domain;PF07534=>TLD;PF07707=>BTB And C-terminal Kelch;	IPR011333 (BTB/POZ fold; IPR013089 (Kelch-related)
RirG004820	6	6_1		PF00651=>BTB/POZ domain;PF07534=>TLD;PF07707=>BTB And C-terminal Kelch;	IPR011333 (BTB/POZ fold; IPR013089 (Kelch-related)
RirG004830	6	6_1	GO:0005488=>binding=>kbtb5_xentr ame: full=kelch repeat and btb domain-containing protein 5;GO:0009987=>cellular process=>kbtb5_xentr ame: full=kelch repeat and btb domain-containing protein 5;GO:0044424=>intracellular part=>kbtb5_xentr ame: full=kelch repeat and btb domain-containing protein 5);	PF00651=>BTB/POZ domain;PF07707=>BTB And C-terminal Kelch;	IPR011333 (BTB/POZ fold; IPR013089 (Kelch-related)
RirG004840	22	22_2	GO:0005003=>ephrin receptor activity=>epb1b_xenla ame: full=ephrin type-b receptor 1-b ame: full=tyrosine-protein kinase receptor xelk;GO:0005515=>protein binding=>epb1b_xenla ame: full=ephrin type-b receptor 1-b ame: full=tyrosine-protein kinase receptor xelk;GO:0005737=>cytoplasm=>epb1b_xenla ame: full=ephrin type-b receptor 1-b ame: full=tyrosine-protein kinase receptor xelk;GO:0006468=>protei…	PF00069=>Protein kinase domain;	IPR011009 (Protein kinase-like domain)
RirG004850	9	9_1
RirG004860	2098	2098_1	GO:0000922=>spindle pole=>tpx2a_xenla ame: full=targeting protein for xklp2-a;GO:0003730=>mRNA 3'-UTR binding=>tpx2a_xenla ame: full=targeting protein for xklp2-a;GO:0005730=>nucleolus=>tpx2a_xenla ame: full=targeting protein for xklp2-a;GO:0005737=>cytoplasm=>tpx2a_xenla ame: full=targeting protein for xklp2-a;GO:0005844=>polysome=>tpx2a_xenla ame: full=targeting protein for xklp2-a;GO:0007281=>…	PF06886=>Targeting protein for Xklp2 (TPX2);	IPR009675 (Xklp2 targeting protein)
RirG004870	2477	2477_1	GO:0005737=>cytoplasm=>yl018_mimiv ame: full= sel1-like repeat-containing protein l18;GO:0009987=>cellular process=>yl018_mimiv ame: full= sel1-like repeat-containing protein l18);	PF08238=>Sel1 repeat;	IPR011990 (Tetratricopeptide-like helical)
RirG004880	6131	6131_1
RirG004890			GO:0000187=>activation of MAPK activity=>ste20_ustma ame: full=serine threonine-protein kinase smu1;GO:0000747=>conjugation with cellular fusion=>ste20_ustma ame: full=serine threonine-protein kinase smu1;GO:0001410=>chlamydospore formation=>ste20_ustma ame: full=serine threonine-protein kinase smu1;GO:0001558=>regulation of cell growth=>ste20_ustma ame: full=serine threonine-protein kinase smu1;…	PF00069=>Protein kinase domain;	IPR011009 (Protein kinase-like domain)
RirG004900	12824	12824_1		PF00172=>Fungal Zn(2)-Cys(6) binuclear cluster domain;	IPR001138 (Zn(2)-C6 fungal-type DNA-binding domain)
RirG004910				PF01053=>Cys/Met metabolism PLP-dependent enzyme;	IPR000277 (Cys/Met metabolism, pyridoxal phosphate-dependent enzyme)
RirG004920	886	886_1
RirG004930
RirG004940
RirG004950	7415	7415_1		PF08238=>Sel1 repeat;	IPR011990 (Tetratricopeptide-like helical)
RirG004960	9	9_1
RirG004970	9024	9024_1			IPR010993 (Sterile alpha motif homology)
RirG004980	2901	2901_1
RirG004990	288	288_1
RirG005000			GO:0000128=>flocculation=>chs7_phano ame: full=chitin synthase export chaperone;GO:0006038=>cell wall chitin biosynthetic process=>chs7_phano ame: full=chitin synthase export chaperone;GO:0006810=>transport=>chs7_phano ame: full=chitin synthase export chaperone;GO:0044182=>filamentous growth of a population of unicellular organisms=>chs7_phano ame: full=chitin synthase export chaperone;GO:0044425…	PF12271=>Chitin synthase III catalytic subunit;	IPR022057 (Chitin synthase III catalytic subunit)
RirG005010	14909	14909_1
RirG005020	14862	14862_1			IPR002156 (Ribonuclease H domain)
RirG005030	55	55_15
RirG005040
RirG005050	29	29_2
RirG005060	1	1_152
RirG005070			GO:0000187=>activation of MAPK activity=>ste20_schpo ame: full=serine threonine-protein kinase shk1 pak1;GO:0001726=>ruffle=>ste20_schpo ame: full=serine threonine-protein kinase shk1 pak1;GO:0004674=>protein serine/threonine kinase activity=>ste20_schpo ame: full=serine threonine-protein kinase shk1 pak1;GO:0004708=>MAP kinase kinase activity=>ste20_schpo ame: full=serine threonine-protein kinas…	PF00069=>Protein kinase domain;	IPR011009 (Protein kinase-like domain)
RirG005080
RirG005090			GO:0008152=>metabolic process=>atg15_picst ame: full= lipase atg15 ame: full=autophagy-related protein 15;GO:0009987=>cellular process=>atg15_picst ame: full= lipase atg15 ame: full=autophagy-related protein 15;GO:0031090=>organelle membrane=>atg15_picst ame: full= lipase atg15 ame: full=autophagy-related protein 15;GO:0043231=>intracellular membrane-bounded organelle=>atg15_picst ame: full= lipa…
RirG005100	886	886_1
RirG005110
RirG005120	443	443_1		PF05699=>hAT family dimerisation domain;	IPR008906 (HAT dimerisation; IPR012337 (Ribonuclease H-like)
RirG005130	5247	5247_1
RirG005140	2113	2113_1	GO:0000785=>chromatin=>asf1a_human ame: full=histone chaperone asf1a ame: full=anti-silencing function protein 1 homolog a short=hasf1 short=hasf1a ame: full=ccg1-interacting factor a short=cia short=hcia;GO:0001649=>osteoblast differentiation=>asf1a_human ame: full=histone chaperone asf1a ame: full=anti-silencing function protein 1 homolog a short=hasf1 short=hasf1a ame: full=ccg1-interacting fa…	PF04729=>ASF1 like histone chaperone;	IPR006818 (Histone chaperone, ASF1-like)
RirG005150	7426	7426_1
RirG005160
RirG005170	14836	14836_1
RirG005180	8955	8955_1
RirG005190	2200	2200_1	GO:0003824=>catalytic activity=>ndua6_ponpy ame: full=nadh dehydrogenase 1 alpha subcomplex subunit 6 ame: full=complex i-b14 short=ci-b14 ame: full=nadh-ubiquinone oxidoreductase b14 subunit;GO:0005747=>mitochondrial respiratory chain complex I=>ndua6_ponpy ame: full=nadh dehydrogenase 1 alpha subcomplex subunit 6 ame: full=complex i-b14 short=ci-b14 ame: full=nadh-ubiquinone oxidoreductase b14 …	PF05347=>Complex 1 protein (LYR family);	IPR008011 (Complex 1 LYR protein)
RirG005200	50	50_2		PF00622=>SPRY domain;	IPR001870 (B302/SPRY domain; IPR008985 (Concanavalin A-like lectin/glucanase)
RirG005210	452	452_1
RirG005220	75	75_1
RirG005230	1256	1256_1
RirG005240	834	834_1
RirG005250				PF12449=>Protein of unknown function (DUF3684) ;	IPR022155 (Protein of unknown function DUF3684)
RirG005260
RirG005270	15	15_28
RirG005280	891	891_1
RirG005290	41	41_7
RirG005300	14906	14906_1
RirG005310	444	444_2
RirG005320	2550	2550_1		PF00383=>Cytidine and deoxycytidylate deaminase zinc-binding region;	IPR016193 (Cytidine deaminase-like)
RirG005330	56	56_1		PF00651=>BTB/POZ domain;PF07534=>TLD;PF07707=>BTB And C-terminal Kelch;	IPR011333 (BTB/POZ fold; IPR013089 (Kelch-related)
RirG005340	223	223_1	GO:0005737=>cytoplasm=>yajo_ecoli ame: full=uncharacterized oxidoreductase;GO:0016020=>membrane=>yajo_ecoli ame: full=uncharacterized oxidoreductase;GO:0016491=>oxidoreductase activity=>yajo_ecoli ame: full=uncharacterized oxidoreductase;GO:0044237=>cellular metabolic process=>yajo_ecoli ame: full=uncharacterized oxidoreductase);	PF00248=>Aldo/keto reductase family;	IPR001395 (Aldo/keto reductase; IPR023210 (NADP-dependent oxidoreductase domain)
RirG005350	7398	7398_1
RirG005360	132	132_4
RirG005370	132	132_1
RirG005380	132	132_1			IPR012337 (Ribonuclease H-like)
RirG005390	12762	12762_1	GO:0044464=>cell part=>sla1_ustma ame: full=actin cytoskeleton-regulatory complex protein sla1);
RirG005400	11214	11214_1
RirG005410	14986	14986_1
RirG005420
RirG005430	15097	15097_1		PF07166=>Protein of unknown function (DUF1398);	IPR009833 (Protein of unknown function DUF1398)
RirG005440	9055	9055_1
RirG005450
RirG005460	131	131_4
RirG005470			GO:0004129=>cytochrome-c oxidase activity=>cox3_allma ame: full=cytochrome c oxidase subunit 3 ame: full=cytochrome c oxidase polypeptide iii;GO:0005751=>mitochondrial respiratory chain complex IV=>cox3_allma ame: full=cytochrome c oxidase subunit 3 ame: full=cytochrome c oxidase polypeptide iii;GO:0006123=>mitochondrial electron transport, cytochrome c to oxygen=>cox3_allma ame: full=cytochrome …	PF00510=>Cytochrome c oxidase subunit III;	IPR000298 (Cytochrome c oxidase, subunit III)
RirG005480					IPR015943 (WD40/YVTN repeat-like-containing domain)
RirG005490
RirG005500	2918	2918_1	GO:0001664=>G-protein coupled receptor binding=>gch1_neucr ame: full=gtp cyclohydrolase 1 ame: full=gtp cyclohydrolase i short=gtp-ch-i;GO:0003934=>GTP cyclohydrolase I activity=>gch1_neucr ame: full=gtp cyclohydrolase 1 ame: full=gtp cyclohydrolase i short=gtp-ch-i;GO:0005184=>neuropeptide hormone activity=>gch1_neucr ame: full=gtp cyclohydrolase 1 ame: full=gtp cyclohydrolase i short=gtp-ch-i;G…	PF01227=>GTP cyclohydrolase I;	IPR001474 (GTP cyclohydrolase I)
RirG005510	5524	5524_1		PF04313=>Type I restriction enzyme R protein N terminus (HSDR_N);	IPR007409 (Restriction endonuclease, type I, EcoRI, R subunit/Type III, Res subunit, N-terminal)
RirG005520	12853	12853_1	GO:0000915=>cytokinesis, actomyosin contractile ring assembly=>rho5_schpo ame: full=gtp-binding protein rho5 flags: precursor;GO:0001666=>response to hypoxia=>rho5_schpo ame: full=gtp-binding protein rho5 flags: precursor;GO:0001737=>establishment of imaginal disc-derived wing hair orientation=>rho5_schpo ame: full=gtp-binding protein rho5 flags: precursor;GO:0002119=>nematode larval development=…	PF00071=>Ras family;	IPR005225 (Small GTP-binding protein)
RirG005530	20	20_2
RirG005540	20	20_1
RirG005550	14	14_4	GO:0004672=>protein kinase activity=>ybeq_ecoli ame: full=uncharacterized protein;GO:0005488=>binding=>ybeq_ecoli ame: full=uncharacterized protein;GO:0005622=>intracellular=>ybeq_ecoli ame: full=uncharacterized protein;GO:0006468=>protein phosphorylation=>ybeq_ecoli ame: full=uncharacterized protein;GO:0006950=>response to stress=>ybeq_ecoli ame: full=uncharacterized protein;GO:0007050=>cell cyc…	PF07714=>Protein tyrosine kinase;PF08238=>Sel1 repeat;	IPR011009 (Protein kinase-like domain; IPR011990 (Tetratricopeptide-like helical)
RirG005560	2528	2528_1
RirG005570			GO:0000289=>nuclear-transcribed mRNA poly(A) tail shortening=>not1_schpo ame: full=general negative regulator of transcription subunit 1;GO:0000932=>cytoplasmic mRNA processing body=>not1_schpo ame: full=general negative regulator of transcription subunit 1;GO:0005515=>protein binding=>not1_schpo ame: full=general negative regulator of transcription subunit 1;GO:0005778=>peroxisomal membrane=>not…
RirG005580	4041	4041_1
RirG005590	6587	6587_1
RirG005600	46	46_8
RirG005610
RirG005620	2530	2530_1
RirG005630	7	7_7	GO:0001819=>positive regulation of cytokine production=>yr831_mimiv ame: full= serine threonine-protein kinase receptor r831 flags: precursor;GO:0002224=>toll-like receptor signaling pathway=>yr831_mimiv ame: full= serine threonine-protein kinase receptor r831 flags: precursor;GO:0004672=>protein kinase activity=>yr831_mimiv ame: full= serine threonine-protein kinase receptor r831 flags: precurso…	PF00069=>Protein kinase domain;	IPR011009 (Protein kinase-like domain)
RirG005640	149	149_1
RirG005650	220	220_2		PF00651=>BTB/POZ domain;PF07707=>BTB And C-terminal Kelch;	IPR011333 (BTB/POZ fold; IPR013089 (Kelch-related)
RirG005660	7866	7866_1		PF05460=>Origin recognition complex subunit 6 (ORC6);	IPR008721 (Origin recognition complex, subunit 6)
RirG005670	15048	15048_1	GO:0004672=>protein kinase activity=>ht1_arath ame: full=serine threonine-protein kinase ht1 ame: full=high leaf temperature protein 1;GO:0005488=>binding=>ht1_arath ame: full=serine threonine-protein kinase ht1 ame: full=high leaf temperature protein 1;GO:0005622=>intracellular=>ht1_arath ame: full=serine threonine-protein kinase ht1 ame: full=high leaf temperature protein 1;GO:0006468=>protein …	PF00069=>Protein kinase domain;	IPR011009 (Protein kinase-like domain)
RirG005680	6104	6104_1	GO:0005488=>binding=>zfp26_mouse ame: full=zinc finger protein 26 short=zfp-26 ame: full=protein mkr3);		IPR015880 (Zinc finger, C2H2-like)
RirG005690
RirG005700	12854	12854_1
RirG005710	665	665_1		PF07534=>TLD;
RirG005720			GO:0005488=>binding=>wdr24_chick ame: full=wd repeat-containing protein 24);
RirG005730	15091	15091_1
RirG005740	5837	5837_1
RirG005750	2917	2917_1		PF02149=>Kinase associated domain 1;	IPR001772 (Kinase-associated KA1)
RirG005760	113	113_1
RirG005770	5249	5249_1
RirG005780	4953	4953_1
RirG005790	5103	5103_1	GO:0005515=>protein binding=>snx33_xentr ame: full=sorting nexin-33 ame: full=sh3 and px domain-containing protein 3;GO:0005543=>phospholipid binding=>snx33_xentr ame: full=sorting nexin-33 ame: full=sh3 and px domain-containing protein 3;GO:0005768=>endosome=>snx33_xentr ame: full=sorting nexin-33 ame: full=sh3 and px domain-containing protein 3;GO:0005886=>plasma membrane=>snx33_xentr ame: full…	PF00018=>SH3 domain;PF00787=>PX domain;PF10456=>WASP-binding domain of Sorting nexin protein;	IPR001452 (Src homology-3 domain; IPR001683 (Phox homologous domain; IPR019497 (Sorting nexin protein, WASP-binding domain)
RirG005800	9894	9894_1	GO:0044238=>primary metabolic process=>mbtp2_ponab ame: full=membrane-bound transcription factor site-2 protease ame: full=endopeptidase s2p);	PF02163=>Peptidase family M50;	IPR001193 (Peptidase M50, mammalian sterol-regulatory element binding protein)
RirG005810	11126	11126_1
RirG005820	4472	4472_1			IPR000086 (NUDIX hydrolase domain)
RirG005830	7425	7425_1
RirG005840	1	1_32		PF00078=>Reverse transcriptase (RNA-dependent DNA polymerase);	IPR015706 (RNA-directed DNA polymerase (reverse transcriptase))
RirG005850	1258	1258_1	GO:0005515=>protein binding=>rn19a_human ame: full=e3 ubiquitin-protein ligase rnf19a ame: full=double ring-finger protein short=dorfin ame: full=ring finger protein 19a ame: full=p38;GO:0016874=>ligase activity=>rn19a_human ame: full=e3 ubiquitin-protein ligase rnf19a ame: full=double ring-finger protein short=dorfin ame: full=ring finger protein 19a ame: full=p38;GO:0044267=>cellular protein me…	PF00097=>Zinc finger;C3HC4 type (RING finger);PF01485=>IBR domain;	IPR002867 (Zinc finger, C6HC-type; IPR018957 (Zinc finger, C3HC4 RING-type)
RirG005860	12839	12839_1	GO:0000075=>cell cycle checkpoint=>ubc_pig ame: full=polyubiquitin-c contains: ame: full=ubiquitin-related contains: ame: full=ubiquitin flags: precursor;GO:0000187=>activation of MAPK activity=>ubc_pig ame: full=polyubiquitin-c contains: ame: full=ubiquitin-related contains: ame: full=ubiquitin flags: precursor;GO:0002020=>protease binding=>ubc_pig ame: full=polyubiquitin-c contains: ame: full=u…	PF00240=>Ubiquitin family;	IPR019955 (Ubiquitin supergroup)
RirG005870
RirG005880	1612	1612_1	GO:0000165=>MAPK cascade=>byr2_schpo ame: full=protein kinase byr2 ame: full=mapk kinase kinase short=mapkkk ame: full=protein kinase ste8;GO:0000186=>activation of MAPKK activity=>byr2_schpo ame: full=protein kinase byr2 ame: full=mapk kinase kinase short=mapkkk ame: full=protein kinase ste8;GO:0000187=>activation of MAPK activity=>byr2_schpo ame: full=protein kinase byr2 ame: full=mapk kinase k…	PF00069=>Protein kinase domain;PF00788=>Ras association (RalGDS/AF-6) domain;PF07647=>SAM domain (Sterile alpha motif);	IPR000159 (Ras-association; IPR010993 (Sterile alpha motif homology; IPR011009 (Protein kinase-like domain)
RirG005890	3535	3535_1	GO:0003677=>DNA binding=>hap2_yeast ame: full=transcriptional activator hap2;GO:0003700=>sequence-specific DNA binding transcription factor activity=>hap2_yeast ame: full=transcriptional activator hap2;GO:0005515=>protein binding=>hap2_yeast ame: full=transcriptional activator hap2;GO:0009411=>response to UV=>hap2_yeast ame: full=transcriptional activator hap2;GO:0009414=>response to water depriv…	PF02045=>CCAAT-binding transcription factor (CBF-B/NF-YA) subunit B;	IPR001289 (CCAAT-binding transcription factor, subunit B)
RirG005900
RirG005910
RirG005920	113	113_1
RirG005930	189	189_2
RirG005940	1	1_7		PF00078=>Reverse transcriptase (RNA-dependent DNA polymerase);	IPR015706 (RNA-directed DNA polymerase (reverse transcriptase))
RirG005950	14884	14884_1
RirG005960	25	25_3
RirG005970	3265	3265_1		PF02714=>Domain of unknown function DUF221;	IPR003864 (Domain of unknown function DUF221)
RirG005980	1	1_62
RirG005990	12863	12863_1		PF00072=>Response regulator receiver domain;	IPR011006 (CheY-like superfamily)
RirG006000
RirG006010	2098	2098_1	GO:0000279=>M phase=>tpx2_astpe ame: full=targeting protein for xklp2 homolog short=tpx2 homolog ame: full=microtubule-associated protein tpx2 homolog;GO:0003676=>nucleic acid binding=>tpx2_astpe ame: full=targeting protein for xklp2 homolog short=tpx2 homolog ame: full=microtubule-associated protein tpx2 homolog;GO:0005819=>spindle=>tpx2_astpe ame: full=targeting protein for xklp2 homolog short=…
RirG006020	4617	4617_1		PF00651=>BTB/POZ domain;	IPR011333 (BTB/POZ fold; IPR013089 (Kelch-related)
RirG006030
RirG006040	12813	12813_1	GO:0008152=>metabolic process=>adh_raleu ame: full=alcohol dehydrogenase;GO:0016616=>oxidoreductase activity, acting on the CH-OH group of donors, NAD or NADP as acceptor=>adh_raleu ame: full=alcohol dehydrogenase);	PF00107=>Zinc-binding dehydrogenase;PF08240=>Alcohol dehydrogenase GroES-like domain;	IPR002085 (Alcohol dehydrogenase superfamily, zinc-containing; IPR020843 (Polyketide synthase, enoylreductase)
RirG006050	15066	15066_1
RirG006060	6890	6890_1	GO:0003824=>catalytic activity=>mobl_thife ame: full=mobilization protein;GO:0005488=>binding=>mobl_thife ame: full=mobilization protein);	PF03389=>MobA/MobL family;	IPR005053 (MobA/MobL protein)
RirG006070	7416	7416_1
RirG006080
RirG006090	7428	7428_1		PF01051=>Initiator Replication protein;	IPR000525 (Initiator Rep protein)
RirG006100	12813	12813_1	GO:0008152=>metabolic process=>adh_raleu ame: full=alcohol dehydrogenase;GO:0016616=>oxidoreductase activity, acting on the CH-OH group of donors, NAD or NADP as acceptor=>adh_raleu ame: full=alcohol dehydrogenase);	PF00107=>Zinc-binding dehydrogenase;PF08240=>Alcohol dehydrogenase GroES-like domain;	IPR002085 (Alcohol dehydrogenase superfamily, zinc-containing; IPR020843 (Polyketide synthase, enoylreductase)
RirG006110			GO:0000075=>cell cycle checkpoint=>mcm2_human ame: full=dna replication licensing factor mcm2 ame: full=minichromosome maintenance protein 2 homolog ame: full=nuclear protein bm28;GO:0000082=>G1/S transition of mitotic cell cycle=>mcm2_human ame: full=dna replication licensing factor mcm2 ame: full=minichromosome maintenance protein 2 homolog ame: full=nuclear protein bm28;GO:0000084=>S phase of …
RirG006120	7	7_4
RirG006130	50	50_1	GO:0010413=>glucuronoxylan metabolic process=>klh23_mouse ame: full=kelch-like protein 23;GO:0045492=>xylan biosynthetic process=>klh23_mouse ame: full=kelch-like protein 23);	PF00622=>SPRY domain;PF00651=>BTB/POZ domain;	IPR003877 (SPla/RYanodine receptor SPRY; IPR008985 (Concanavalin A-like lectin/glucanase; IPR011333 (BTB/POZ fold; IPR013089 (Kelch-related)
RirG006140	50	50_1	GO:0010413=>glucuronoxylan metabolic process=>klh23_mouse ame: full=kelch-like protein 23;GO:0045492=>xylan biosynthetic process=>klh23_mouse ame: full=kelch-like protein 23);	PF00622=>SPRY domain;PF00651=>BTB/POZ domain;	IPR003877 (SPla/RYanodine receptor SPRY; IPR008985 (Concanavalin A-like lectin/glucanase; IPR011333 (BTB/POZ fold; IPR013089 (Kelch-related)
RirG006150	50	50_1		PF00622=>SPRY domain;PF00651=>BTB/POZ domain;	IPR001870 (B302/SPRY domain; IPR008985 (Concanavalin A-like lectin/glucanase; IPR011333 (BTB/POZ fold; IPR013089 (Kelch-related)
RirG006160	20	20_1
RirG006170	11120	11120_1
RirG006180				PF12505=>Protein of unknown function (DUF3712);	IPR022185 (Protein of unknown function DUF3712)
RirG006190	15121	15121_1
RirG006200	2522	2522_1
RirG006210			GO:0005765=>lysosomal membrane=>sut31_arath ame: full=sulfate transporter ame: full=ast12 ame: full= 1;GO:0005783=>endoplasmic reticulum=>sut31_arath ame: full=sulfate transporter ame: full=ast12 ame: full= 1;GO:0005794=>Golgi apparatus=>sut31_arath ame: full=sulfate transporter ame: full=ast12 ame: full= 1;GO:0005886=>plasma membrane=>sut31_arath ame: full=sulfate transporter ame: full=ast12 ame…
RirG006220	14899	14899_1
RirG006230	4044	4044_1
RirG006240	189	189_1
RirG006250	1413	1413_1
RirG006260	950	950_1		PF07534=>TLD;
RirG006270	3269	3269_1
RirG006280	7	7_2	GO:0001819=>positive regulation of cytokine production=>limk_dicdi ame: full=probable lim domain-containing serine threonine-protein kinase ddb_g0287001;GO:0002224=>toll-like receptor signaling pathway=>limk_dicdi ame: full=probable lim domain-containing serine threonine-protein kinase ddb_g0287001;GO:0004672=>protein kinase activity=>limk_dicdi ame: full=probable lim domain-containing serine thr…	PF00069=>Protein kinase domain;	IPR011009 (Protein kinase-like domain)
RirG006290				PF01541=>GIY-YIG catalytic domain;	IPR000305 (Excinuclease ABC, C subunit, N-terminal)
RirG006300	10151	10151_1
RirG006310	7	7_2	GO:0001819=>positive regulation of cytokine production=>pats1_dicdi ame: full=probable serine threonine-protein kinase pats1 ame: full=protein associated with the transduction of signal 1;GO:0002224=>toll-like receptor signaling pathway=>pats1_dicdi ame: full=probable serine threonine-protein kinase pats1 ame: full=protein associated with the transduction of signal 1;GO:0004672=>protein kinase ac…	PF07714=>Protein tyrosine kinase;	IPR011009 (Protein kinase-like domain)
RirG006320	7	7_7	GO:0000166=>nucleotide binding=>pyk3_dicdi ame: full=dual specificity protein kinase pyk3 ame: full=tyrosine-protein kinase 3;GO:0001819=>positive regulation of cytokine production=>pyk3_dicdi ame: full=dual specificity protein kinase pyk3 ame: full=tyrosine-protein kinase 3;GO:0002224=>toll-like receptor signaling pathway=>pyk3_dicdi ame: full=dual specificity protein kinase pyk3 ame: full=tyros…	PF00069=>Protein kinase domain;PF07714=>Protein tyrosine kinase;	IPR011009 (Protein kinase-like domain)
RirG006330	11144	11144_1
RirG006340	11144	11144_1
RirG006350
RirG006360	15064	15064_1		PF00505=>HMG (high mobility group) box;	IPR009071 (High mobility group, superfamily)
RirG006370	12784	12784_1	GO:0005515=>protein binding=>ima3_schpo ame: full=probable importin;GO:0043231=>intracellular membrane-bounded organelle=>ima3_schpo ame: full=probable importin);	PF03378=>CAS/CSE protein;C-terminus;	IPR016024 (Armadillo-type fold)
RirG006380	288	288_2
RirG006390	63	63_17
RirG006400	14919	14919_1
RirG006410	6913	6913_1		PF08883=>Dopa 4,5-dioxygenase family;	IPR014980 (Dopa 4,5-dioxygenase)
RirG006420	195	195_2
RirG006430	26	26_15
RirG006440	1605	1605_1		PF00173=>Cytochrome b5-like Heme/Steroid binding domain;	IPR001199 (Cytochrome b5)
RirG006450	48	48_1
RirG006460	2850	2850_1
RirG006470	90	90_1
RirG006480	101	101_1	GO:0000340=>RNA 7-methylguanosine cap binding=>pnh1_orysj ame: full=protein argonaute pnh1 ame: full=protein pinhead homolog 1 short= 1;GO:0000932=>cytoplasmic mRNA processing body=>pnh1_orysj ame: full=protein argonaute pnh1 ame: full=protein pinhead homolog 1 short= 1;GO:0005515=>protein binding=>pnh1_orysj ame: full=protein argonaute pnh1 ame: full=protein pinhead homolog 1 short= 1;GO:0005731…	PF02171=>Piwi domain;	IPR012337 (Ribonuclease H-like)
RirG006490	40	40_19
RirG006500
RirG006510	9	9_12
RirG006520	965	965_1
RirG006530	15	15_34
RirG006540	12833	12833_1
RirG006550				PF08238=>Sel1 repeat;	IPR011990 (Tetratricopeptide-like helical)
RirG006560	16	16_45
RirG006570	1830	1830_1
RirG006580					IPR007275 (YTH domain)
RirG006590	2520	2520_1		PF04795=>PAPA-1-like conserved region;	IPR006880 (PAPA-1-like conserved region)
RirG006600	10110	10110_1
RirG006610	272	272_1
RirG006620
RirG006630
RirG006640	6550	6550_1
RirG006650	9025	9025_1		PF01076=>Plasmid recombination enzyme;	IPR001668 (Plasmid recombination enzyme)
RirG006660	62	62_17
RirG006670	15118	15118_1
RirG006680
RirG006690	11158	11158_1
RirG006700				PF04548=>AIG1 family;	IPR006703 (AIG1)
RirG006710				PF00994=>Probable molybdopterin binding domain;	IPR001453 (Molybdopterin binding)
RirG006720	2922	2922_1	GO:0004518=>nuclease activity=>mus81_emeni ame: full=crossover junction endonuclease mus81;GO:0005488=>binding=>mus81_emeni ame: full=crossover junction endonuclease mus81;GO:0005634=>nucleus=>mus81_emeni ame: full=crossover junction endonuclease mus81;GO:0006281=>DNA repair=>mus81_emeni ame: full=crossover junction endonuclease mus81;GO:0006310=>DNA recombination=>mus81_emeni ame: full=crossover…		IPR010996 (DNA-directed DNA polymerase, family X, beta-like, N-terminal)
RirG006730	4363	4363_1
RirG006740	8	8_13		PF08238=>Sel1 repeat;	IPR011990 (Tetratricopeptide-like helical)
RirG006750
RirG006760	1027	1027_1	GO:0000278=>mitotic cell cycle=>ypf11_plaf7 ame: full=uncharacterized protein pfb0765w;GO:0000279=>M phase=>ypf11_plaf7 ame: full=uncharacterized protein pfb0765w;GO:0005515=>protein binding=>ypf11_plaf7 ame: full=uncharacterized protein pfb0765w;GO:0005634=>nucleus=>ypf11_plaf7 ame: full=uncharacterized protein pfb0765w;GO:0015630=>microtubule cytoskeleton=>ypf11_plaf7 ame: full=uncharacterized …
RirG006770	525	525_1
RirG006780	14978	14978_1
RirG006790					IPR000924 (Glutamyl/glutaminyl-tRNA synthetase, class Ic)
RirG006800	7391	7391_1
RirG006810	15	15_2
RirG006820
RirG006830	15	15_2
RirG006840	15	15_2		PF00076=>RNA recognition motif. (a.k.a. RRM;RBD, or RNP domain);	IPR012677 (Nucleotide-binding, alpha-beta plait)
RirG006850	12787	12787_1
RirG006860	15075	15075_1
RirG006870	1	1_158		PF00075=>RNase H;	IPR002156 (Ribonuclease H domain)
RirG006880	3213	3213_1
RirG006890	2529	2529_1
RirG006900	6911	6911_1
RirG006910	6585	6585_1
RirG006920	6585	6585_1
RirG006930
RirG006940	6121	6121_1		PF00069=>Protein kinase domain;	IPR020636 (Calcium/calmodulin-dependent protein kinase-like)
RirG006950	2886	2886_1	GO:0005515=>protein binding=>ipp_human ame: full=actin-binding protein ipp ame: full=intracisternal a particle-promoted polypeptide short=ipp ame: full=kelch-like protein 27;GO:0005634=>nucleus=>ipp_human ame: full=actin-binding protein ipp ame: full=intracisternal a particle-promoted polypeptide short=ipp ame: full=kelch-like protein 27;GO:0006970=>response to osmotic stress=>ipp_human ame: full…	PF00651=>BTB/POZ domain;	IPR011333 (BTB/POZ fold; IPR013089 (Kelch-related)
RirG006960	3312	3312_1
RirG006970	60	60_2		PF07714=>Protein tyrosine kinase;	IPR011009 (Protein kinase-like domain)
RirG006980	7840	7840_1	GO:0001725=>stress fiber=>actn4_bovin ame: full=alpha-actinin-4 ame: full=f-actin cross-linking protein ame: full=non-muscle alpha-actinin 4;GO:0001882=>nucleoside binding=>actn4_bovin ame: full=alpha-actinin-4 ame: full=f-actin cross-linking protein ame: full=non-muscle alpha-actinin 4;GO:0005178=>integrin binding=>actn4_bovin ame: full=alpha-actinin-4 ame: full=f-actin cross-linking protein ame…	PF00307=>Calponin homology (CH) domain;	IPR001715 (Calponin homology domain)
RirG006990	7840	7840_1	GO:0001725=>stress fiber=>actn4_bovin ame: full=alpha-actinin-4 ame: full=f-actin cross-linking protein ame: full=non-muscle alpha-actinin 4;GO:0001882=>nucleoside binding=>actn4_bovin ame: full=alpha-actinin-4 ame: full=f-actin cross-linking protein ame: full=non-muscle alpha-actinin 4;GO:0005178=>integrin binding=>actn4_bovin ame: full=alpha-actinin-4 ame: full=f-actin cross-linking protein ame…	PF00307=>Calponin homology (CH) domain;	IPR001715 (Calponin homology domain)
RirG007000	255	255_2	GO:0005886=>plasma membrane=>chs1_crynv ame: full=chitin synthase 1 ame: full=chitin-udp acetyl-glucosaminyl transferase 1 ame: full=class-iv chitin synthase 1;GO:0006023=>aminoglycan biosynthetic process=>chs1_crynv ame: full=chitin synthase 1 ame: full=chitin-udp acetyl-glucosaminyl transferase 1 ame: full=class-iv chitin synthase 1;GO:0008194=>UDP-glycosyltransferase activity=>chs1_crynv ame: …	PF00173=>Cytochrome b5-like Heme/Steroid binding domain;PF03142=>Chitin synthase;	IPR001199 (Cytochrome b5; IPR004835 (Fungal chitin synthase)
RirG007010	16	16_1	GO:0009639=>response to red or far red light=>fhy3_arath ame: full=protein far-red elongated hypocotyl 3;GO:0044238=>primary metabolic process=>fhy3_arath ame: full=protein far-red elongated hypocotyl 3;GO:0044699=>single-organism process=>fhy3_arath ame: full=protein far-red elongated hypocotyl 3;GO:0050794=>regulation of cellular process=>fhy3_arath ame: full=protein far-red elongated hypocotyl…	PF10551=>MULE transposase domain;	IPR018289 (MULE transposase, conserved domain)
RirG007020	9781	9781_1	GO:0005515=>protein binding=>ubp16_bovin ame: full=ubiquitin carboxyl-terminal hydrolase 16 ame: full=deubiquitinating enzyme 16 ame: full=ubiquitin thioesterase 16 ame: full=ubiquitin-specific-processing protease 16;GO:0006351=>transcription, DNA-dependent=>ubp16_bovin ame: full=ubiquitin carboxyl-terminal hydrolase 16 ame: full=deubiquitinating enzyme 16 ame: full=ubiquitin thioesterase 16 ame:…	PF00443=>Ubiquitin carboxyl-terminal hydrolase;PF02148=>Zn-finger in ubiquitin-hydrolases and other protein;	IPR001394 (Peptidase C19, ubiquitin carboxyl-terminal hydrolase 2; IPR001607 (Zinc finger, UBP-type; IPR013083 (Zinc finger, RING/FYVE/PHD-type)
RirG007030	4158	4158_1	GO:0003676=>nucleic acid binding=>acon2_schpo ame: full=probable aconitate hydratase 2 short=aconitase ame: full=citrate hydro-lyase;GO:0005739=>mitochondrion=>acon2_schpo ame: full=probable aconitate hydratase 2 short=aconitase ame: full=citrate hydro-lyase;GO:0006325=>chromatin organization=>acon2_schpo ame: full=probable aconitate hydratase 2 short=aconitase ame: full=citrate hydro-lyase;GO:00…	PF00829=>Ribosomal prokaryotic L21 protein;	IPR001787 (Ribosomal protein L21)
RirG007040	4287	4287_1	GO:0003677=>DNA binding=>tfam_human ame: full=transcription factor mitochondrial short=mttfa ame: full=mitochondrial transcription factor 1 short= 1 ame: full=transcription factor 6 short=tcf-6 ame: full=transcription factor 6-like 2 flags: precursor;GO:0005515=>protein binding=>tfam_human ame: full=transcription factor mitochondrial short=mttfa ame: full=mitochondrial transcription factor 1 shor…	PF00505=>HMG (high mobility group) box;	IPR009071 (High mobility group, superfamily)
RirG007050
RirG007060	2586	2586_1		PF02656=>Domain of unknown function (DUF202);	IPR003807 (Protein of unknown function DUF202)
RirG007070	6917	6917_1
RirG007080	1264	1264_1
RirG007090	6136	6136_1
RirG007100	14850	14850_1		PF05728=>Uncharacterised protein family (UPF0227);	IPR008886 (Uncharacterised protein family UPF0227/Esterase YqiA)
RirG007110	1747	1747_1	GO:0004871=>signal transducer activity=>tmd11_canfa ame: full=transmembrane emp24 domain-containing protein 11 ame: full=glycoprotein 25l short=gp25l ame: full=p24 family protein alpha-1 short=p24alpha1 flags: precursor;GO:0016020=>membrane=>tmd11_canfa ame: full=transmembrane emp24 domain-containing protein 11 ame: full=glycoprotein 25l short=gp25l ame: full=p24 family protein alpha-1 short=p24a…	PF01105=>emp24/gp25L/p24 family/GOLD;	IPR009038 (GOLD)
RirG007120			GO:0005737=>cytoplasm=>gde1_yeast ame: full=glycerophosphodiester phosphodiesterase gde1;GO:0006650=>glycerophospholipid metabolic process=>gde1_yeast ame: full=glycerophosphodiester phosphodiesterase gde1;GO:0008081=>phosphoric diester hydrolase activity=>gde1_yeast ame: full=glycerophosphodiester phosphodiesterase gde1;GO:0044281=>small molecule metabolic process=>gde1_yeast ame: full=glyceroph…	PF03009=>Glycerophosphoryl diester phosphodiesterase family;	IPR004129 (Glycerophosphoryl diester phosphodiesterase)
RirG007130	5519	5519_1		PF09495=>Protein of unknown function (DUF2462);	IPR019034 (Uncharacterised protein family UPF0390)
RirG007140	14897	14897_1
RirG007150	12836	12836_1	GO:0005774=>vacuolar membrane=>atg18_ustma ame: full=autophagy-related protein 18;GO:0006914=>autophagy=>atg18_ustma ame: full=autophagy-related protein 18;GO:0015031=>protein transport=>atg18_ustma ame: full=autophagy-related protein 18;GO:0034045=>pre-autophagosomal structure membrane=>atg18_ustma ame: full=autophagy-related protein 18;GO:0035091=>phosphatidylinositol binding=>atg18_ustma ame: …
RirG007160			GO:0000139=>Golgi membrane=>nhx1_yeast ame: full=endosomal prevacuolar sodium hydrogen exchanger ame: full=endosomal prevacuolar na(+) h(+) exchanger ame: full=vacuolar protein sorting-associated protein 44 flags: precursor;GO:0005739=>mitochondrion=>nhx1_yeast ame: full=endosomal prevacuolar sodium hydrogen exchanger ame: full=endosomal prevacuolar na(+) h(+) exchanger ame: full=vacuolar protein…	PF00999=>Sodium/hydrogen exchanger family;	IPR006153 (Cation/H+ exchanger)
RirG007170	5510	5510_1
RirG007180
RirG007190	6892	6892_1		PF08238=>Sel1 repeat;	IPR011990 (Tetratricopeptide-like helical)
RirG007200	32	32_3
RirG007210	161	161_1
RirG007220			GO:0002119=>nematode larval development=>kthy_human ame: full=thymidylate kinase ame: full=dtmp kinase;GO:0004798=>thymidylate kinase activity=>kthy_human ame: full=thymidylate kinase ame: full=dtmp kinase;GO:0009792=>embryo development ending in birth or egg hatching=>kthy_human ame: full=thymidylate kinase ame: full=dtmp kinase;GO:0040007=>growth=>kthy_human ame: full=thymidylate kinase ame: fu…	PF02223=>Thymidylate kinase;PF10484=>Mitochondrial ribosomal protein S23;	IPR018094 (Thymidylate kinase)
RirG007230
RirG007240	270	270_1
RirG007250	15099	15099_1		PF01258=>Prokaryotic dksA/traR C4-type zinc finger;	IPR012783 (Zinc finger, C4 DksA/TraR-type)
RirG007260
RirG007270	25	25_14		PF07646=>Kelch motif;	IPR015915 (Kelch-type beta propeller)
RirG007280	25	25_3		PF01344=>Kelch motif;	IPR015915 (Kelch-type beta propeller)
RirG007290	4374	4374_1
RirG007300	2898	2898_1
RirG007310	12831	12831_1
RirG007320	1	1_52			IPR015706 (RNA-directed DNA polymerase (reverse transcriptase))
RirG007330	362	362_1	GO:0005634=>nucleus=>p1_arath ame: full=nadp-dependent alkenal double bond reductase p1 short=dbr1;GO:0005829=>cytosol=>p1_arath ame: full=nadp-dependent alkenal double bond reductase p1 short=dbr1;GO:0006690=>icosanoid metabolic process=>p1_arath ame: full=nadp-dependent alkenal double bond reductase p1 short=dbr1;GO:0006865=>amino acid transport=>p1_arath ame: full=nadp-dependent alkenal double…	PF00107=>Zinc-binding dehydrogenase;	IPR002085 (Alcohol dehydrogenase superfamily, zinc-containing; IPR011032 (GroES-like; IPR013149 (Alcohol dehydrogenase, C-terminal; IPR016040 (NAD(P)-binding domain)
RirG007340	142	142_1
RirG007350	12764	12764_1	GO:0000187=>activation of MAPK activity=>wis1_schpo ame: full=protein kinase wis1 ame: full=protein kinase sty2;GO:0000287=>magnesium ion binding=>wis1_schpo ame: full=protein kinase wis1 ame: full=protein kinase sty2;GO:0002755=>MyD88-dependent toll-like receptor signaling pathway=>wis1_schpo ame: full=protein kinase wis1 ame: full=protein kinase sty2;GO:0004708=>MAP kinase kinase activity=>wis1…	PF00069=>Protein kinase domain;	IPR011009 (Protein kinase-like domain)
RirG007360	3289	3289_1
RirG007370	14934	14934_1
RirG007380
RirG007390	1444	1444_1	GO:0005515=>protein binding=>dhsb_ustma ame: full=succinate dehydrogenase iron-sulfur mitochondrial ame: full=iron-sulfur subunit of complex ii short=ip flags: precursor;GO:0005749=>mitochondrial respiratory chain complex II=>dhsb_ustma ame: full=succinate dehydrogenase iron-sulfur mitochondrial ame: full=iron-sulfur subunit of complex ii short=ip flags: precursor;GO:0006099=>tricarboxylic acid c…		IPR004489 (Succinate dehydrogenase/fumarate reductase iron-sulphur protein; IPR009051 (Alpha-helical ferredoxin; IPR012675 (Beta-grasp fold, ferredoxin-type; IPR017896 (4Fe-4S ferredoxin, iron-sulpur binding domain)
RirG007400			GO:0000776=>kinetochore=>seh1_schpo ame: full=nucleoporin seh1 ame: full=nuclear pore protein seh1;GO:0005515=>protein binding=>seh1_schpo ame: full=nucleoporin seh1 ame: full=nuclear pore protein seh1;GO:0005783=>endoplasmic reticulum=>seh1_schpo ame: full=nucleoporin seh1 ame: full=nuclear pore protein seh1;GO:0005975=>carbohydrate metabolic process=>seh1_schpo ame: full=nucleoporin seh1 ame: f…	PF00400=>WD domain;G-beta repeat;	IPR015943 (WD40/YVTN repeat-like-containing domain)
RirG007410
RirG007420				PF00026=>Eukaryotic aspartyl protease;	IPR001461 (Peptidase A1; IPR021109 (Peptidase aspartic)
RirG007430	521	521_1		PF00505=>HMG (high mobility group) box;	IPR009071 (High mobility group, superfamily)
RirG007440
RirG007450	8	8_18	GO:0009987=>cellular process=>ybeq_ecoli ame: full=uncharacterized protein;GO:0042221=>response to chemical stimulus=>ybeq_ecoli ame: full=uncharacterized protein);	PF08238=>Sel1 repeat;	IPR011990 (Tetratricopeptide-like helical)
RirG007460
RirG007470	7391	7391_1
RirG007480
RirG007490
RirG007500	11210	11210_1
RirG007510	9	9_1
RirG007520					IPR001046 (Natural resistance-associated macrophage protein)
RirG007530
RirG007540
RirG007550	272	272_3
RirG007560	5825	5825_1
RirG007570	11	11_1	GO:0016301=>kinase activity=>zak1_dicdi ame: full=dual specificity protein kinase zaka ame: full=zaphod k kinase 1 short=zaphod kinase 1 ame: full=zaphod kinase a);	PF00069=>Protein kinase domain;	IPR011009 (Protein kinase-like domain)
RirG007580	26	26_1
RirG007590	7	7_10
RirG007600	7	7_7	GO:0001819=>positive regulation of cytokine production=>y9963_dicdi ame: full=probable serine threonine-protein kinase ddb_g0272254;GO:0002224=>toll-like receptor signaling pathway=>y9963_dicdi ame: full=probable serine threonine-protein kinase ddb_g0272254;GO:0004674=>protein serine/threonine kinase activity=>y9963_dicdi ame: full=probable serine threonine-protein kinase ddb_g0272254;GO:0006355=…	PF07714=>Protein tyrosine kinase;	IPR011009 (Protein kinase-like domain)
RirG007610	7397	7397_1
RirG007620	2477	2477_1	GO:0009987=>cellular process=>ybeq_ecoli ame: full=uncharacterized protein;GO:0050896=>response to stimulus=>ybeq_ecoli ame: full=uncharacterized protein);	PF08238=>Sel1 repeat;	IPR011990 (Tetratricopeptide-like helical)
RirG007630	9	9_4
RirG007640
RirG007650	3741	3741_1		PF00400=>WD domain;G-beta repeat;	IPR015943 (WD40/YVTN repeat-like-containing domain)
RirG007660	3741	3741_1			IPR015943 (WD40/YVTN repeat-like-containing domain)
RirG007670	9	9_1
RirG007680	14908	14908_1
RirG007690	740	740_1
RirG007700	35	35_3
RirG007710	13	13_7		PF07714=>Protein tyrosine kinase;	IPR011009 (Protein kinase-like domain)
RirG007720			GO:0000398=>mRNA splicing, via spliceosome=>rh43_arath ame: full= dead-box atp-dependent rna helicase 43;GO:0000741=>karyogamy=>rh43_arath ame: full= dead-box atp-dependent rna helicase 43;GO:0003676=>nucleic acid binding=>rh43_arath ame: full= dead-box atp-dependent rna helicase 43;GO:0003713=>transcription coactivator activity=>rh43_arath ame: full= dead-box atp-dependent rna helicase 43;GO:000…	PF00270=>DEAD/DEAH box helicase;	IPR014014 (RNA helicase, DEAD-box type, Q motif; IPR014021 (Helicase, superfamily 1/2, ATP-binding domain)
RirG007730	7423	7423_1
RirG007740			GO:0000166=>nucleotide binding=>tcph_schpo ame: full=probable t-complex protein 1 subunit eta short=tcp-1-eta ame: full=cct-eta;GO:0005739=>mitochondrion=>tcph_schpo ame: full=probable t-complex protein 1 subunit eta short=tcp-1-eta ame: full=cct-eta;GO:0005832=>chaperonin-containing T-complex=>tcph_schpo ame: full=probable t-complex protein 1 subunit eta short=tcp-1-eta ame: full=cct-eta;GO:0005…	PF00118=>TCP-1/cpn60 chaperonin family;	IPR002423 (Chaperonin Cpn60/TCP-1)
RirG007750	832	832_1
RirG007760	2911	2911_1	GO:0000398=>mRNA splicing, via spliceosome=>rpab2_yeast ame: full=dna-directed rna polymerases and iii subunit rpabc2 short=rna polymerases and iii subunit abc2 ame: full=abc23 ame: full=dna-directed rna polymerases and iii 23 kda polypeptide;GO:0003677=>DNA binding=>rpab2_yeast ame: full=dna-directed rna polymerases and iii subunit rpabc2 short=rna polymerases and iii subunit abc2 ame: full=abc2…	PF01192=>RNA polymerase Rpb6 ;	IPR006110 (RNA polymerase, subunit omega/K/RPABC2)
RirG007770	5241	5241_1
RirG007780	11	11_4
RirG007790	11	11_3		PF07714=>Protein tyrosine kinase;	IPR001245 (Serine-threonine/tyrosine-protein kinase)
RirG007800
RirG007810	59	59_2
RirG007820
RirG007830
RirG007840	3607	3607_1
RirG007850	46	46_1
RirG007860	46	46_1
RirG007870	46	46_1
RirG007880	16	16_4	GO:0003700=>sequence-specific DNA binding transcription factor activity=>frs4_arath ame: full=protein far1-related sequence 4;GO:0005515=>protein binding=>frs4_arath ame: full=protein far1-related sequence 4;GO:0005634=>nucleus=>frs4_arath ame: full=protein far1-related sequence 4;GO:0005886=>plasma membrane=>frs4_arath ame: full=protein far1-related sequence 4;GO:0007049=>cell cycle=>frs4_arath …	PF03101=>FAR1 DNA-binding domain;PF10551=>MULE transposase domain;	IPR004330 (Transcription factor, FAR1-related; IPR018289 (MULE transposase, conserved domain)
RirG007890	16	16_3			IPR007527 (Zinc finger, SWIM-type)
RirG007900	6583	6583_1
RirG007910	185	185_2			IPR002293 (Amino acid/polyamine transporter I)
RirG007920
RirG007930	185	185_2			IPR002293 (Amino acid/polyamine transporter I)
RirG007940	185	185_1	GO:0006865=>amino acid transport=>bat1_rabit ame: full=b( +)-type amino acid transporter 1 short=b( +)at ame: full=4f2-lc6 ame: full=glycoprotein-associated amino acid transporter +at1 ame: full=solute carrier family 7 member 9;GO:0009987=>cellular process=>bat1_rabit ame: full=b( +)-type amino acid transporter 1 short=b( +)at ame: full=4f2-lc6 ame: full=glycoprotein-associated amino acid transpo…		IPR002293 (Amino acid/polyamine transporter I)
RirG007950	891	891_1			IPR001841 (Zinc finger, RING-type; IPR013083 (Zinc finger, RING/FYVE/PHD-type)
RirG007960
RirG007970	393	393_1
RirG007980	62	62_8
RirG007990	7855	7855_1
RirG008000	5823	5823_1
RirG008010	118	118_11
RirG008020	1	1_1
RirG008030	6904	6904_1
RirG008040	6890	6890_1	GO:0003824=>catalytic activity=>mobl_thife ame: full=mobilization protein;GO:0005488=>binding=>mobl_thife ame: full=mobilization protein);	PF03389=>MobA/MobL family;	IPR005053 (MobA/MobL protein)
RirG008050	7416	7416_1
RirG008060				PF00072=>Response regulator receiver domain;	IPR011006 (CheY-like superfamily)
RirG008070	9	9_3
RirG008080	3285	3285_1
RirG008090			GO:0000114=>regulation of transcription involved in G1 phase of mitotic cell cycle=>gcn5_ashgo ame: full=histone acetyltransferase gcn5;GO:0000122=>negative regulation of transcription from RNA polymerase II promoter=>gcn5_ashgo ame: full=histone acetyltransferase gcn5;GO:0000790=>nuclear chromatin=>gcn5_ashgo ame: full=histone acetyltransferase gcn5;GO:0000794=>condensed nuclear chromosome=>gcn5…	PF00439=>Bromodomain;	IPR001487 (Bromodomain)
RirG008100	1125	1125_1	GO:0000184=>nuclear-transcribed mRNA catabolic process, nonsense-mediated decay=>rs9a_schpo ame: full=40s ribosomal protein s9-a;GO:0001510=>RNA methylation=>rs9a_schpo ame: full=40s ribosomal protein s9-a;GO:0002119=>nematode larval development=>rs9a_schpo ame: full=40s ribosomal protein s9-a;GO:0003735=>structural constituent of ribosome=>rs9a_schpo ame: full=40s ribosomal protein s9-a;GO:00055…	PF00163=>Ribosomal protein S4/S9 N-terminal domain;PF01479=>S4 domain;	IPR001912 (Ribosomal protein S4/S9, N-terminal; IPR022801 (Ribosomal protein S4/S9)
RirG008110	1619	1619_1	GO:0005515=>protein binding=>lcb4_yeast ame: full=sphingoid long chain base kinase 4 short=lcb kinase 4 ame: full=sphinganine kinase 4;GO:0006665=>sphingolipid metabolic process=>lcb4_yeast ame: full=sphingoid long chain base kinase 4 short=lcb kinase 4 ame: full=sphinganine kinase 4;GO:0006950=>response to stress=>lcb4_yeast ame: full=sphingoid long chain base kinase 4 short=lcb kinase 4 ame: fu…
RirG008120	12723	12723_1
RirG008130	5503	5503_1
RirG008140	46	46_6
RirG008150	6949	6949_1
RirG008160	790	790_1	GO:0005506=>iron ion binding=>adrx_yeast ame: full=adrenodoxin mitochondrial ame: full=mitochondrial ferredoxin flags: precursor;GO:0006694=>steroid biosynthetic process=>adrx_yeast ame: full=adrenodoxin mitochondrial ame: full=mitochondrial ferredoxin flags: precursor;GO:0008022=>protein C-terminus binding=>adrx_yeast ame: full=adrenodoxin mitochondrial ame: full=mitochondrial ferredoxin flags: …	PF00111=>2Fe-2S iron-sulfur cluster binding domain;	IPR001055 (Adrenodoxin; IPR012675 (Beta-grasp fold, ferredoxin-type)
RirG008170	5555	5555_1
RirG008180	3723	3723_1
RirG008190	114	114_1
RirG008200	17157	17157_1	GO:0016020=>membrane=>tm9s3_human ame: full=transmembrane 9 superfamily member 3 ame: full=ep70-p-iso ame: full=sm-11044-binding protein flags: precursor);	PF02990=>Endomembrane protein 70;	IPR004240 (Nonaspanin (TM9SF))
RirG008210
RirG008220			GO:0003824=>catalytic activity=>pma10_arath ame: full=atpase plasma membrane-type ame: full=proton pump 10;GO:0005488=>binding=>pma10_arath ame: full=atpase plasma membrane-type ame: full=proton pump 10;GO:0016020=>membrane=>pma10_arath ame: full=atpase plasma membrane-type ame: full=proton pump 10);		IPR001757 (ATPase, P-type, K/Mg/Cd/Cu/Zn/Na/Ca/Na/H-transporter; IPR023214 (HAD-like domain; IPR023298 (ATPase, P-type, transmembrane domain)
RirG008230	12841	12841_1	GO:0005515=>protein binding=>atg4_crynb ame: full=cysteine protease atg4 ame: full=autophagy-related protein 4;GO:0006508=>proteolysis=>atg4_crynb ame: full=cysteine protease atg4 ame: full=autophagy-related protein 4;GO:0006810=>transport=>atg4_crynb ame: full=cysteine protease atg4 ame: full=autophagy-related protein 4;GO:0006914=>autophagy=>atg4_crynb ame: full=cysteine protease atg4 ame: full…	PF03416=>Peptidase family C54;	IPR005078 (Peptidase C54)
RirG008240	4047	4047_1
RirG008250					IPR011009 (Protein kinase-like domain)
RirG008260	14998	14998_1
RirG008270	1851	1851_1	GO:0005488=>binding=>cg1c_schpo ame: full=cyclin pch1 ame: full=pombe cyclin c homolog 1;GO:0005634=>nucleus=>cg1c_schpo ame: full=cyclin pch1 ame: full=pombe cyclin c homolog 1;GO:0006366=>transcription from RNA polymerase II promoter=>cg1c_schpo ame: full=cyclin pch1 ame: full=pombe cyclin c homolog 1;GO:0007049=>cell cycle=>cg1c_schpo ame: full=cyclin pch1 ame: full=pombe cyclin c homolog 1;GO…	PF00134=>Cyclin;N-terminal domain;	IPR011028 (Cyclin-like; IPR015429 (Transcription regulator cyclin)
RirG008280
RirG008290	1965	1965_1	GO:0001510=>RNA methylation=>spb1_mago7 ame: full= et-dependent rrna methyltransferase spb1 ame: full=2 -o-ribose rna methyltransferase ame: full=s-adenosyl-l-methionine-dependent methyltransferase;GO:0003676=>nucleic acid binding=>spb1_mago7 ame: full= et-dependent rrna methyltransferase spb1 ame: full=2 -o-ribose rna methyltransferase ame: full=s-adenosyl-l-methionine-dependent methyltransferas…	PF01728=>FtsJ-like methyltransferase;	IPR015507 (Ribosomal RNA large subunit methyltransferase E)
RirG008300	8	8_11
RirG008310	214	214_1
RirG008320	1264	1264_1
RirG008330	10174	10174_1
RirG008340
RirG008350
RirG008360	10554	10554_1
RirG008370	443	443_2		PF05699=>hAT family dimerisation domain;	IPR008906 (HAT dimerisation; IPR012337 (Ribonuclease H-like)
RirG008380
RirG008390	443	443_2		PF05699=>hAT family dimerisation domain;	IPR008906 (HAT dimerisation; IPR012337 (Ribonuclease H-like)
RirG008400	3215	3215_1
RirG008410	60	60_4		PF08238=>Sel1 repeat;	IPR011990 (Tetratricopeptide-like helical)
RirG008420	11209	11209_1
RirG008430	6116	6116_1	GO:0000003=>reproduction=>ubi4p_schpo ame: full=polyubiquitin contains: ame: full=ubiquitin flags: precursor;GO:0002224=>toll-like receptor signaling pathway=>ubi4p_schpo ame: full=polyubiquitin contains: ame: full=ubiquitin flags: precursor;GO:0002474=>antigen processing and presentation of peptide antigen via MHC class I=>ubi4p_schpo ame: full=polyubiquitin contains: ame: full=ubiquitin flags: …	PF00240=>Ubiquitin family;	IPR019955 (Ubiquitin supergroup)
RirG008440			GO:0004430=>1-phosphatidylinositol 4-kinase activity=>stt4_schpo ame: full=phosphatidylinositol 4-kinase stt4 short=pi4-kinase short= ns-4-kinase;GO:0005634=>nucleus=>stt4_schpo ame: full=phosphatidylinositol 4-kinase stt4 short=pi4-kinase short= ns-4-kinase;GO:0005798=>Golgi-associated vesicle=>stt4_schpo ame: full=phosphatidylinositol 4-kinase stt4 short=pi4-kinase short= ns-4-kinase;GO:0005829…	PF00454=>Phosphatidylinositol 3- and 4-kinase;	IPR015433 (Phosphatidylinositol Kinase)
RirG008450	745	745_1	GO:0000166=>nucleotide binding=>tra2b_rat ame: full=transformer-2 protein homolog beta short=tra-2 beta short=tra2-beta ame: full=ra301 ame: full=splicing arginine serine-rich 10 ame: full=transformer-2 protein homolog b;GO:0000245=>spliceosomal complex assembly=>tra2b_rat ame: full=transformer-2 protein homolog beta short=tra-2 beta short=tra2-beta ame: full=ra301 ame: full=splicing arginine ser…		IPR012677 (Nucleotide-binding, alpha-beta plait)
RirG008460	7411	7411_1
RirG008470	75	75_1
RirG008480	7705	7705_1		PF06747=>CHCH domain;	IPR009069 (MTCP1; IPR010625 (CHCH)
RirG008490	14984	14984_1
RirG008500	10110	10110_1
RirG008510	4622	4622_1
RirG008520	902	902_1	GO:0005471=>ATP:ADP antiporter activity=>adt1_goshi ame: full= carrier protein mitochondrial ame: full=adp atp translocase 1 ame: full=adenine nucleotide translocator 1 short=ant 1 flags: precursor;GO:0005507=>copper ion binding=>adt1_goshi ame: full= carrier protein mitochondrial ame: full=adp atp translocase 1 ame: full=adenine nucleotide translocator 1 short=ant 1 flags: precursor;GO:0005618=>…	PF00153=>Mitochondrial carrier protein;	IPR001993 (Mitochondrial substrate carrier)
RirG008530	14770	14770_1		PF08238=>Sel1 repeat;	IPR011990 (Tetratricopeptide-like helical)
RirG008540	12877	12877_1
RirG008550	6568	6568_1
RirG008560
RirG008570	1	1_24		PF00078=>Reverse transcriptase (RNA-dependent DNA polymerase);	IPR015706 (RNA-directed DNA polymerase (reverse transcriptase))
RirG008580				PF10191=>Golgi complex component 7 (COG7);	IPR019335 (Conserved oligomeric Golgi complex, subunit 7)
RirG008590	9891	9891_1		PF04183=>IucA / IucC family;PF06276=>Ferric iron reductase FhuF-like transporter;	IPR007310 (Aerobactin siderophore biosynthesis, IucA/IucC, N-terminal; IPR022770 (FhuF/siderophore biosynthesis protein, C-terminal)
RirG008600	1107	1107_1	GO:0006810=>transport=>nah2_schpo ame: full=probable na(+) h(+) antiporter);	PF00999=>Sodium/hydrogen exchanger family;	IPR006153 (Cation/H+ exchanger)
RirG008610	5589	5589_1			IPR013326 (Apolipoprotein/apolipophorin)
RirG008620	3291	3291_1		PF03031=>NLI interacting factor-like phosphatase;	IPR004274 (NLI interacting factor; IPR023214 (HAD-like domain)
RirG008630	175	175_1
RirG008640	1	1_2			IPR015706 (RNA-directed DNA polymerase (reverse transcriptase))
RirG008650	4949	4949_1		PF00443=>Ubiquitin carboxyl-terminal hydrolase;	IPR001394 (Peptidase C19, ubiquitin carboxyl-terminal hydrolase 2)
RirG008660	6006	6006_1
RirG008670	1195	1195_1	GO:0000785=>chromatin=>ubc8_schpo ame: full=ubiquitin-conjugating enzyme e2 8 ame: full=ubiquitin carrier protein 8 ame: full=ubiquitin-protein ligase 8;GO:0004842=>ubiquitin-protein ligase activity=>ubc8_schpo ame: full=ubiquitin-conjugating enzyme e2 8 ame: full=ubiquitin carrier protein 8 ame: full=ubiquitin-protein ligase 8;GO:0005515=>protein binding=>ubc8_schpo ame: full=ubiquitin-conjugati…	PF00179=>Ubiquitin-conjugating enzyme;	IPR015581 (Ubiquitin-conjugating enzyme; IPR016135 (Ubiquitin-conjugating enzyme/RWD-like; IPR023313 (Ubiquitin-conjugating enzyme, active site)
RirG008680	2775	2775_1	GO:0003697=>single-stranded DNA binding=>pms2_human ame: full=mismatch repair endonuclease pms2 ame: full=dna mismatch repair protein pms2 ame: full=pms1 protein homolog 2;GO:0006200=>ATP catabolic process=>pms2_human ame: full=mismatch repair endonuclease pms2 ame: full=dna mismatch repair protein pms2 ame: full=pms1 protein homolog 2;GO:0006298=>mismatch repair=>pms2_human ame: full=mismatch re…	PF01119=>DNA mismatch repair protein;C-terminal domain;PF02518=>Histidine kinase-;DNA gyrase B-, and HSP90-like ATPase;PF08676=>MutL C terminal dimerisation domain;	IPR002099 (DNA mismatch repair protein)
RirG008690	7	7_10
RirG008700	48	48_1
RirG008710				PF03432=>Relaxase/Mobilisation nuclease domain ;PF05713=>Bacterial mobilisation protein (MobC);	IPR005094 (Endonuclease relaxase, MobA/VirD2; IPR008687 (Bacterial mobilisation)
RirG008720	17197	17197_1			IPR003033 (SCP2 sterol-binding domain; IPR011990 (Tetratricopeptide-like helical)
RirG008730	1	1_21
RirG008740	1264	1264_1
RirG008750	1	1_18	GO:0003824=>catalytic activity=>pol2_mouse ame: full=retrovirus-related pol polyprotein line-1 ame: full=long interspersed element-1 short=l1 includes: ame: full=reverse transcriptase includes: ame: full=endonuclease);	PF00078=>Reverse transcriptase (RNA-dependent DNA polymerase);	IPR015706 (RNA-directed DNA polymerase (reverse transcriptase))
RirG008760	9	9_3
RirG008770	4936	4936_1		PF06437=>IMP-specific 5'-nucleotidase;	IPR009453 (IMP-specific 5-nucleotidase; IPR023214 (HAD-like domain)
RirG008780	3269	3269_1
RirG008790
RirG008800	4037	4037_1		PF00651=>BTB/POZ domain;	IPR011333 (BTB/POZ fold)
RirG008810	1	1_27
RirG008820			GO:0005515=>protein binding=>gtr2_chick ame: full=solute carrier family facilitated glucose transporter member 2 ame: full=glucose transporter type liver short=glut-2;GO:0008152=>metabolic process=>gtr2_chick ame: full=solute carrier family facilitated glucose transporter member 2 ame: full=glucose transporter type liver short=glut-2;GO:0008645=>hexose transport=>gtr2_chick ame: full=solute carri…	PF00083=>Sugar (and other) transporter;	IPR005828 (General substrate transporter; IPR016196 (Major facilitator superfamily, general substrate transporter)
RirG008830
RirG008840	1827	1827_1
RirG008850	63	63_1
RirG008860	59	59_2
RirG008870	4185	4185_1		PF03114=>BAR domain;	IPR004148 (BAR)
RirG008880	11242	11242_1
RirG008890	10148	10148_1		PF00078=>Reverse transcriptase (RNA-dependent DNA polymerase);	IPR000477 (Reverse transcriptase)
RirG008900	15	15_7
RirG008910	1	1_1		PF00075=>RNase H;	IPR012337 (Ribonuclease H-like)
RirG008920			GO:0003723=>RNA binding=>rk2_olipu ame: full=50s ribosomal protein chloroplastic;GO:0003735=>structural constituent of ribosome=>rk2_olipu ame: full=50s ribosomal protein chloroplastic;GO:0005762=>mitochondrial large ribosomal subunit=>rk2_olipu ame: full=50s ribosomal protein chloroplastic;GO:0006412=>translation=>rk2_olipu ame: full=50s ribosomal protein chloroplastic;GO:0009507=>chloroplast=>r…	PF00181=>Ribosomal Proteins L2;RNA binding domain;	IPR002171 (Ribosomal protein L2; IPR016027 (Nucleic acid-binding, OB-fold-like)
RirG008930			GO:0003723=>RNA binding=>rk2_sinal ame: full=50s ribosomal protein chloroplastic;GO:0003735=>structural constituent of ribosome=>rk2_sinal ame: full=50s ribosomal protein chloroplastic;GO:0005762=>mitochondrial large ribosomal subunit=>rk2_sinal ame: full=50s ribosomal protein chloroplastic;GO:0006412=>translation=>rk2_sinal ame: full=50s ribosomal protein chloroplastic;GO:0009507=>chloroplast=>r…	PF03947=>Ribosomal Proteins L2;C-terminal domain;	IPR002171 (Ribosomal protein L2)
RirG008940	7854	7854_1	GO:0005783=>endoplasmic reticulum=>use1_mouse ame: full=vesicle transport protein use1 ame: full=protein d12 ame: full=use1-like protein;GO:0006888=>ER to Golgi vesicle-mediated transport=>use1_mouse ame: full=vesicle transport protein use1 ame: full=protein d12 ame: full=use1-like protein;GO:0007029=>endoplasmic reticulum organization=>use1_mouse ame: full=vesicle transport protein use1 ame: ful…	PF09753=>Membrane fusion protein Use1;	IPR019150 (Vesicle transport protein, Use1)
RirG008950	14889	14889_1
RirG008960	94	94_4
RirG008970	14981	14981_1
RirG008980	6	6_2	GO:0044424=>intracellular part=>kbtba_human ame: full=kelch repeat and btb domain-containing protein 10 ame: full=kel-like protein 23 ame: full=kelch-related protein 1 ame: full=sarcosin);	PF00651=>BTB/POZ domain;PF07534=>TLD;PF07707=>BTB And C-terminal Kelch;	IPR011333 (BTB/POZ fold; IPR013089 (Kelch-related)
RirG008990	837	837_1	GO:0004252=>serine-type endopeptidase activity=>sepr_thesr ame: full=extracellular serine proteinase flags: precursor;GO:0005576=>extracellular region=>sepr_thesr ame: full=extracellular serine proteinase flags: precursor;GO:0009987=>cellular process=>sepr_thesr ame: full=extracellular serine proteinase flags: precursor;GO:0019863=>IgE binding=>sepr_thesr ame: full=extracellular serine proteinase…	PF00082=>Subtilase family;	IPR015500 (Peptidase S8, subtilisin-related)
RirG009000
RirG009010	9	9_1
RirG009020	14824	14824_1
RirG009030	4484	4484_1
RirG009040	3676	3676_1	GO:0002098=>tRNA wobble uridine modification=>urm12_arath ame: full=ubiquitin-related modifier 1 homolog 2;GO:0005515=>protein binding=>urm12_arath ame: full=ubiquitin-related modifier 1 homolog 2;GO:0005829=>cytosol=>urm12_arath ame: full=ubiquitin-related modifier 1 homolog 2;GO:0016783=>sulfurtransferase activity=>urm12_arath ame: full=ubiquitin-related modifier 1 homolog 2;GO:0034227=>tRNA th…	PF09138=>Urm1 (Ubiquitin related modifier);	IPR012675 (Beta-grasp fold, ferredoxin-type; IPR015221 (Ubiquitin-related modifier 1)
RirG009050	7332	7332_1
RirG009060	9046	9046_1
RirG009070	14822	14822_1
RirG009080	9060	9060_1
RirG009090
RirG009100				PF00069=>Protein kinase domain;	IPR011009 (Protein kinase-like domain)
RirG009110	14864	14864_1
RirG009120	1019	1019_1
RirG009130	22	22_1	GO:0000186=>activation of MAPKK activity=>yr831_mimiv ame: full= serine threonine-protein kinase receptor r831 flags: precursor;GO:0002224=>toll-like receptor signaling pathway=>yr831_mimiv ame: full= serine threonine-protein kinase receptor r831 flags: precursor;GO:0002252=>immune effector process=>yr831_mimiv ame: full= serine threonine-protein kinase receptor r831 flags: precursor;GO:0004709=>…	PF07714=>Protein tyrosine kinase;	IPR011009 (Protein kinase-like domain)
RirG009140	783	783_1	GO:0005515=>protein binding=>aria_arath ame: full=arm repeat protein interacting with abf2 short=aria;GO:0005737=>cytoplasm=>aria_arath ame: full=arm repeat protein interacting with abf2 short=aria;GO:0034645=>cellular macromolecule biosynthetic process=>aria_arath ame: full=arm repeat protein interacting with abf2 short=aria;GO:0043231=>intracellular membrane-bounded organelle=>aria_arath ame: f…	PF00651=>BTB/POZ domain;	IPR011333 (BTB/POZ fold; IPR013089 (Kelch-related)
RirG009150	50	50_1		PF00622=>SPRY domain;PF00651=>BTB/POZ domain;	IPR001870 (B302/SPRY domain; IPR008985 (Concanavalin A-like lectin/glucanase; IPR011333 (BTB/POZ fold; IPR013089 (Kelch-related)
RirG009160	190	190_2		PF02221=>ML domain;	IPR014756 (Immunoglobulin E-set)
RirG009170	6568	6568_1
RirG009180	665	665_1
RirG009190	6937	6937_1
RirG009200	3171	3171_1
RirG009210	14826	14826_1	GO:0005515=>protein binding=>aka7g_human ame: full=a-kinase anchor protein 7 isoform gamma short=akap-7 isoform gamma ame: full=a-kinase anchor protein 18 kda short=akap 18 ame: full=protein kinase a-anchoring protein 7 isoform gamma short=prka7 isoform gamma;GO:0043231=>intracellular membrane-bounded organelle=>aka7g_human ame: full=a-kinase anchor protein 7 isoform gamma short=akap-7 isoform ga…	PF10469=>AKAP7 2'5' RNA ligase-like domain;	IPR009097 (RNA ligase/cyclic nucleotide phosphodiesterase)
RirG009220	500	500_1	GO:0004174=>electron-transferring-flavoprotein dehydrogenase activity=>etfd_human ame: full=electron transfer flavoprotein-ubiquinone mitochondrial short=etf-qo short=etf-ubiquinone oxidoreductase ame: full=electron-transferring-flavoprotein dehydrogenase short=etf dehydrogenase flags: precursor;GO:0006979=>response to oxidative stress=>etfd_human ame: full=electron transfer flavoprotein-ubiquino…	PF05187=>Electron transfer flavoprotein-ubiquinone oxidoreductase;PF07992=>Pyridine nucleotide-disulphide oxidoreductase;	IPR007859 (Electron transfer flavoprotein-ubiquinone oxidoreductase; IPR013027 (FAD-dependent pyridine nucleotide-disulphide oxidoreductase)
RirG009230			GO:0005488=>binding=>rsz32_arath ame: full=serine arginine-rich splicing factor rs2z32 ame: full=rs-containing zinc finger protein 32 short=at-rs2z32 short=at-rsz32;GO:0006396=>RNA processing=>rsz32_arath ame: full=serine arginine-rich splicing factor rs2z32 ame: full=rs-containing zinc finger protein 32 short=at-rs2z32 short=at-rsz32;GO:0044424=>intracellular part=>rsz32_arath ame: full=serine a…	PF00098=>Zinc knuckle;	IPR001878 (Zinc finger, CCHC-type; IPR012677 (Nucleotide-binding, alpha-beta plait)
RirG009240	17205	17205_1		PF10158=>Tumour suppressor protein;	IPR018780 (Tumour suppressor protein, LOH1CR12)
RirG009250	17261	17261_1
RirG009260	1483	1483_1	GO:0005829=>cytosol=>galdh_arath ame: full=l-galactose dehydrogenase short=at- short=l-;GO:0010349=>L-galactose dehydrogenase activity=>galdh_arath ame: full=l-galactose dehydrogenase short=at- short=l-;GO:0016616=>oxidoreductase activity, acting on the CH-OH group of donors, NAD or NADP as acceptor=>galdh_arath ame: full=l-galactose dehydrogenase short=at- short=l-;GO:0019853=>L-ascorbic acid bi…	PF00248=>Aldo/keto reductase family;	IPR001395 (Aldo/keto reductase; IPR023210 (NADP-dependent oxidoreductase domain)
RirG009270	1231	1231_1	GO:0000320=>re-entry into mitotic cell cycle=>gsk3b_xenla ame: full=glycogen synthase kinase-3 beta short=gsk-3 beta ame: full=xgsk-3 protein;GO:0001085=>RNA polymerase II transcription factor binding=>gsk3b_xenla ame: full=glycogen synthase kinase-3 beta short=gsk-3 beta ame: full=xgsk-3 protein;GO:0001837=>epithelial to mesenchymal transition=>gsk3b_xenla ame: full=glycogen synthase kinase-3 be…	PF00069=>Protein kinase domain;	IPR011009 (Protein kinase-like domain)
RirG009280	12840	12840_1
RirG009290	161	161_4	GO:0003824=>catalytic activity=>rn213_human ame: full=e3 ubiquitin-protein ligase rnf213 ame: full=alk lymphoma oligomerization partner on chromosome 17 ame: full=mysterin ame: full=ring finger protein 213;GO:0044237=>cellular metabolic process=>rn213_human ame: full=e3 ubiquitin-protein ligase rnf213 ame: full=alk lymphoma oligomerization partner on chromosome 17 ame: full=mysterin ame: full=rin…		IPR003593 (ATPase, AAA+ type, core)
RirG009300	161	161_5	GO:0003824=>catalytic activity=>rn213_human ame: full=e3 ubiquitin-protein ligase rnf213 ame: full=alk lymphoma oligomerization partner on chromosome 17 ame: full=mysterin ame: full=ring finger protein 213;GO:0044237=>cellular metabolic process=>rn213_human ame: full=e3 ubiquitin-protein ligase rnf213 ame: full=alk lymphoma oligomerization partner on chromosome 17 ame: full=mysterin ame: full=rin…		IPR003593 (ATPase, AAA+ type, core)
RirG009310	161	161_2	GO:0009987=>cellular process=>rbp2b_plaf7 ame: full=reticulocyte binding protein 2 homolog b);
RirG009320	15092	15092_1
RirG009330	952	952_1
RirG009340	2851	2851_1			IPR009003 (Peptidase cysteine/serine, trypsin-like)
RirG009350	783	783_1			IPR013089 (Kelch-related)
RirG009360					IPR014770 (Munc13 homology 1)
RirG009370	5510	5510_1
RirG009380			GO:0003870=>5-aminolevulinate synthase activity=>hem1_emeni ame: full=5-aminolevulinate mitochondrial ame: full=5-aminolevulinic acid synthase ame: full=delta-ala synthase ame: full=delta-aminolevulinate synthase flags: precursor;GO:0005739=>mitochondrion=>hem1_emeni ame: full=5-aminolevulinate mitochondrial ame: full=5-aminolevulinic acid synthase ame: full=delta-ala synthase ame: full=delta-ami…	PF00155=>Aminotransferase class I and II;	IPR015424 (Pyridoxal phosphate-dependent transferase, major domain)
RirG009390	4933	4933_1
RirG009400	5823	5823_1
RirG009410	6118	6118_1	GO:0006351=>transcription, DNA-dependent=>yn28_schpo ame: full=uncharacterized transcriptional regulatory protein);	PF00172=>Fungal Zn(2)-Cys(6) binuclear cluster domain;	IPR001138 (Zn(2)-C6 fungal-type DNA-binding domain)
RirG009420	1866	1866_1	GO:0009058=>biosynthetic process=>fabd_bacsu ame: full=malonyl -acyl carrier protein transacylase short=mct;GO:0016740=>transferase activity=>fabd_bacsu ame: full=malonyl -acyl carrier protein transacylase short=mct);	PF00698=>Acyl transferase domain;	IPR016035 (Acyl transferase/acyl hydrolase/lysophospholipase)
RirG009430	12776	12776_1	GO:0000139=>Golgi membrane=>syb1_schpo ame: full=synaptobrevin homolog 1;GO:0005515=>protein binding=>syb1_schpo ame: full=synaptobrevin homolog 1;GO:0005739=>mitochondrion=>syb1_schpo ame: full=synaptobrevin homolog 1;GO:0005764=>lysosome=>syb1_schpo ame: full=synaptobrevin homolog 1;GO:0005768=>endosome=>syb1_schpo ame: full=synaptobrevin homolog 1;GO:0005802=>trans-Golgi network=>syb1_schpo am…	PF00957=>Synaptobrevin;	IPR001388 (Synaptobrevin)
RirG009440	14792	14792_1		PF01076=>Plasmid recombination enzyme;	IPR001668 (Plasmid recombination enzyme)
RirG009450	15116	15116_1
RirG009460	11241	11241_1
RirG009470	3292	3292_1
RirG009480			GO:0004342=>glucosamine-6-phosphate deaminase activity=>gnpi1_human ame: full=glucosamine-6-phosphate isomerase 1 ame: full=glucosamine-6-phosphate deaminase 1 short=gnpda 1 short= 6p deaminase 1 ame: full=oscillin;GO:0005737=>cytoplasm=>gnpi1_human ame: full=glucosamine-6-phosphate isomerase 1 ame: full=glucosamine-6-phosphate deaminase 1 short=gnpda 1 short= 6p deaminase 1 ame: full=oscillin;GO…	PF01182=>Glucosamine-6-phosphate isomerases/6-phosphogluconolactonase;	IPR004547 (Glucosamine-6-phosphate isomerase; IPR006148 (Glucosamine/galactosamine-6-phosphate isomerase)
RirG009490	1431	1431_1		PF03372=>Endonuclease/Exonuclease/phosphatase family;	IPR005135 (Endonuclease/exonuclease/phosphatase)
RirG009500	6147	6147_1
RirG009510	14902	14902_1
RirG009520			GO:0000003=>reproduction=>wdr5_bovin ame: full=wd repeat-containing protein 5;GO:0001501=>skeletal system development=>wdr5_bovin ame: full=wd repeat-containing protein 5;GO:0005671=>Ada2/Gcn5/Ada3 transcription activator complex=>wdr5_bovin ame: full=wd repeat-containing protein 5;GO:0005875=>microtubule associated complex=>wdr5_bovin ame: full=wd repeat-containing protein 5;GO:0006355=>regulati…	PF00400=>WD domain;G-beta repeat;	IPR015943 (WD40/YVTN repeat-like-containing domain; IPR020472 (G-protein beta WD-40 repeat)
RirG009530	8728	8728_1
RirG009540	7833	7833_1
RirG009550	521	521_1		PF00505=>HMG (high mobility group) box;	IPR009071 (High mobility group, superfamily)
RirG009560	315	315_1
RirG009570	15107	15107_1
RirG009580	14977	14977_1		PF02518=>Histidine kinase-;DNA gyrase B-, and HSP90-like ATPase;	IPR003594 (ATPase-like, ATP-binding domain)
RirG009590	1	1_92
RirG009600	1	1_105
RirG009610	5844	5844_1		PF03959=>Serine hydrolase (FSH1);	IPR005645 (Serine hydrolase)
RirG009620			GO:0000718=>nucleotide-excision repair, DNA damage removal=>ddb1a_arath ame: full=dna damage-binding protein 1a ame: full=uv-damaged dna-binding protein 1a short=ddb1a;GO:0003684=>damaged DNA binding=>ddb1a_arath ame: full=dna damage-binding protein 1a ame: full=uv-damaged dna-binding protein 1a short=ddb1a;GO:0005515=>protein binding=>ddb1a_arath ame: full=dna damage-binding protein 1a ame: full…
RirG009630	1435	1435_1		PF04935=>Surfeit locus protein 6;	IPR007019 (Surfeit locus 6)
RirG009640
RirG009650	65	65_12
RirG009660	1	1_30		PF00075=>RNase H;	IPR012337 (Ribonuclease H-like)
RirG009670	7423	7423_1
RirG009680	14949	14949_1		PF00078=>Reverse transcriptase (RNA-dependent DNA polymerase);	IPR000477 (Reverse transcriptase)
RirG009690	5823	5823_1
RirG009700	5247	5247_1
RirG009710
RirG009720
RirG009730	24	24_17
RirG009740
RirG009750	2477	2477_1		PF08238=>Sel1 repeat;	IPR011990 (Tetratricopeptide-like helical)
RirG009760	5836	5836_1
RirG009770
RirG009780	1606	1606_1	GO:0016491=>oxidoreductase activity=>stcc_emeni ame: full= sterigmatocystin biosynthesis peroxidase stcc flags: precursor);	PF01328=>Peroxidase;family 2;	IPR000028 (Chloroperoxidase)
RirG009790	4931	4931_1		PF03928=>Domain of unknown function (DUF336);	IPR005624 (Domain of unknown function DUF336)
RirG009800	12767	12767_1
RirG009810	317	317_2			IPR013761 (Sterile alpha motif-type)
RirG009820	390	390_2
RirG009830
RirG009840	12859	12859_1		PF03860=>Domain of Unknown Function (DUF326) ;	IPR005560 (Protein of unknown function DUF326)
RirG009850	15066	15066_1
RirG009860	6890	6890_1	GO:0003824=>catalytic activity=>mobl_thife ame: full=mobilization protein;GO:0005488=>binding=>mobl_thife ame: full=mobilization protein);	PF03389=>MobA/MobL family;	IPR005053 (MobA/MobL protein)
RirG009870	7428	7428_1		PF01051=>Initiator Replication protein;	IPR000525 (Initiator Rep protein)
RirG009880
RirG009890			GO:0005488=>binding=>ephx4_mouse ame: full=epoxide hydrolase 4 ame: full=abhydrolase domain-containing protein 7 ame: full=epoxide hydrolase-related protein;GO:0006954=>inflammatory response=>ephx4_mouse ame: full=epoxide hydrolase 4 ame: full=abhydrolase domain-containing protein 7 ame: full=epoxide hydrolase-related protein;GO:0008217=>regulation of blood pressure=>ephx4_mouse ame: full=epoxide…	PF00561=>alpha/beta hydrolase fold;	IPR000073 (Alpha/beta hydrolase fold-1)
RirG009900	277	277_1	GO:0004497=>monooxygenase activity=>c86b1_arath ame: full=cytochrome p450 86b1;GO:0005488=>binding=>c86b1_arath ame: full=cytochrome p450 86b1;GO:0005783=>endoplasmic reticulum=>c86b1_arath ame: full=cytochrome p450 86b1;GO:0009507=>chloroplast=>c86b1_arath ame: full=cytochrome p450 86b1;GO:0010345=>suberin biosynthetic process=>c86b1_arath ame: full=cytochrome p450 86b1;GO:0016117=>carotenoid bi…	PF00067=>Cytochrome P450;	IPR001128 (Cytochrome P450)
RirG009910	6	6_2		PF00651=>BTB/POZ domain;PF07534=>TLD;PF07707=>BTB And C-terminal Kelch;	IPR011333 (BTB/POZ fold; IPR013089 (Kelch-related)
RirG009920	1	1_47		PF00075=>RNase H;	IPR012337 (Ribonuclease H-like)
RirG009930	8	8_3	GO:0004674=>protein serine/threonine kinase activity=>ybeq_ecoli ame: full=uncharacterized protein;GO:0005488=>binding=>ybeq_ecoli ame: full=uncharacterized protein;GO:0006952=>defense response=>ybeq_ecoli ame: full=uncharacterized protein;GO:0006955=>immune response=>ybeq_ecoli ame: full=uncharacterized protein;GO:0007049=>cell cycle=>ybeq_ecoli ame: full=uncharacterized protein;GO:0007254=>JNK …	PF00069=>Protein kinase domain;PF08238=>Sel1 repeat;	IPR011009 (Protein kinase-like domain; IPR011990 (Tetratricopeptide-like helical)
RirG009940	35	35_1
RirG009950	273	273_1
RirG009960	7824	7824_1		PF08241=>Methyltransferase domain;	IPR013216 (Methyltransferase type 11)
RirG009970	2886	2886_1		PF00651=>BTB/POZ domain;	IPR011333 (BTB/POZ fold; IPR013089 (Kelch-related)
RirG009980	2074	2074_1	GO:0000122=>negative regulation of transcription from RNA polymerase II promoter=>prz1_schpo ame: full=transcriptional regulator prz1 ame: full=pbp1-responsive zinc finger protein 1;GO:0000790=>nuclear chromatin=>prz1_schpo ame: full=transcriptional regulator prz1 ame: full=pbp1-responsive zinc finger protein 1;GO:0000987=>core promoter proximal region sequence-specific DNA binding=>prz1_schpo am…	PF00096=>Zinc finger;C2H2 type;	IPR013087 (Zinc finger, C2H2-type/integrase, DNA-binding)
RirG009990	314	314_1
RirG010000	964	964_1
RirG010010	178	178_1	GO:0000786=>nucleosome=>h2a1_debha ame: full=histone;GO:0003677=>DNA binding=>h2a1_debha ame: full=histone;GO:0005634=>nucleus=>h2a1_debha ame: full=histone;GO:0006281=>DNA repair=>h2a1_debha ame: full=histone;GO:0006334=>nucleosome assembly=>h2a1_debha ame: full=histone);	PF00125=>Core histone H2A/H2B/H3/H4;	IPR009072 (Histone-fold)
RirG010020	11210	11210_1		PF02945=>Recombination endonuclease VII;	IPR004211 (Recombination endonuclease VII)
RirG010030	9041	9041_1
RirG010040	14915	14915_1
RirG010050	84	84_4	GO:0005215=>transporter activity=>ab14g_arath ame: full=abc transporter g family member 14 short=abc transporter short= 14 ame: full=white-brown complex homolog protein 14 short= 14;GO:0005488=>binding=>ab14g_arath ame: full=abc transporter g family member 14 short=abc transporter short= 14 ame: full=white-brown complex homolog protein 14 short= 14;GO:0005886=>plasma membrane=>ab14g_arath ame: fu…	PF01061=>ABC-2 type transporter;	IPR013525 (ABC-2 type transporter)
RirG010060	5551	5551_1	GO:0000288=>nuclear-transcribed mRNA catabolic process, deadenylation-dependent decay=>dcp1b_mouse ame: full=mrna-decapping enzyme 1b;GO:0000932=>cytoplasmic mRNA processing body=>dcp1b_mouse ame: full=mrna-decapping enzyme 1b;GO:0010467=>gene expression=>dcp1b_mouse ame: full=mrna-decapping enzyme 1b;GO:0042802=>identical protein binding=>dcp1b_mouse ame: full=mrna-decapping enzyme 1b;GO:0043231…	PF06058=>Dcp1-like decapping family;	IPR010334 (Dcp1-like decapping)
RirG010070	14842	14842_1
RirG010080	1	1_55
RirG010090	114	114_1
RirG010100	26	26_7
RirG010110	26	26_7
RirG010120	7420	7420_1
RirG010130	586	586_1
RirG010140	4623	4623_1
RirG010150	195	195_2
RirG010160	4152	4152_1	GO:0000175=>3'-5'-exoribonuclease activity=>exos4_bovin ame: full=exosome complex component rrp41 ame: full=exosome component 4 ame: full=ribosomal rna-processing protein 41;GO:0000178=>exosome (RNase complex)=>exos4_bovin ame: full=exosome complex component rrp41 ame: full=exosome component 4 ame: full=ribosomal rna-processing protein 41;GO:0000460=>maturation of 5.8S rRNA=>exos4_bovin ame: full…	PF01138=>3' exoribonuclease family;domain 1;PF03725=>3' exoribonuclease family;domain 2;	IPR015847 (Exoribonuclease, phosphorolytic domain 2; IPR020568 (Ribosomal protein S5 domain 2-type fold)
RirG010170
RirG010180	24	24_37
RirG010190	10113	10113_1
RirG010200	826	826_1
RirG010210	11240	11240_1
RirG010220
RirG010230	189	189_1
RirG010240			GO:0005515=>protein binding=>ybeq_ecoli ame: full=uncharacterized protein;GO:0005739=>mitochondrion=>ybeq_ecoli ame: full=uncharacterized protein;GO:0016020=>membrane=>ybeq_ecoli ame: full=uncharacterized protein;GO:0043281=>regulation of cysteine-type endopeptidase activity involved in apoptotic process=>ybeq_ecoli ame: full=uncharacterized protein;GO:0050896=>response to stimulus=>ybeq_ecoli am…	PF08238=>Sel1 repeat;	IPR011990 (Tetratricopeptide-like helical)
RirG010250	10123	10123_1
RirG010260	8	8_11		PF07714=>Protein tyrosine kinase;	IPR011009 (Protein kinase-like domain)
RirG010270	57	57_3		PF08238=>Sel1 repeat;	IPR011990 (Tetratricopeptide-like helical)
RirG010280	14869	14869_1
RirG010290	14821	14821_1
RirG010300	1	1_128
RirG010310	1	1_32		PF00078=>Reverse transcriptase (RNA-dependent DNA polymerase);	IPR015706 (RNA-directed DNA polymerase (reverse transcriptase))
RirG010320	14959	14959_1
RirG010330	7423	7423_1
RirG010340	11231	11231_1
RirG010350	1	1_44
RirG010360	1	1_2			IPR015706 (RNA-directed DNA polymerase (reverse transcriptase))
RirG010370	2477	2477_1		PF08238=>Sel1 repeat;	IPR011990 (Tetratricopeptide-like helical)
RirG010380			GO:0000166=>nucleotide binding=>sf3b4_rat ame: full=splicing factor 3b subunit 4;GO:0000398=>mRNA splicing, via spliceosome=>sf3b4_rat ame: full=splicing factor 3b subunit 4;GO:0003723=>RNA binding=>sf3b4_rat ame: full=splicing factor 3b subunit 4;GO:0005515=>protein binding=>sf3b4_rat ame: full=splicing factor 3b subunit 4;GO:0005654=>nucleoplasm=>sf3b4_rat ame: full=splicing factor 3b subunit 4…		IPR012677 (Nucleotide-binding, alpha-beta plait)
RirG010390	886	886_1
RirG010400	1271	1271_1	GO:0004672=>protein kinase activity=>ssp2_playo ame: full=sporozoite surface protein 2 flags: precursor;GO:0005198=>structural molecule activity=>ssp2_playo ame: full=sporozoite surface protein 2 flags: precursor;GO:0005618=>cell wall=>ssp2_playo ame: full=sporozoite surface protein 2 flags: precursor;GO:0007155=>cell adhesion=>ssp2_playo ame: full=sporozoite surface protein 2 flags: precursor;GO…
RirG010410	65	65_22
RirG010420	1	1_58
RirG010430	8	8_18	GO:0005739=>mitochondrion=>ybeq_ecoli ame: full=uncharacterized protein;GO:0006915=>apoptotic process=>ybeq_ecoli ame: full=uncharacterized protein;GO:0008152=>metabolic process=>ybeq_ecoli ame: full=uncharacterized protein;GO:0042221=>response to chemical stimulus=>ybeq_ecoli ame: full=uncharacterized protein);	PF08238=>Sel1 repeat;	IPR011990 (Tetratricopeptide-like helical)
RirG010440	40	40_1
RirG010450	15	15_2
RirG010460
RirG010470
RirG010480	76	76_1
RirG010490	76	76_13
RirG010500	1	1_1
RirG010510
RirG010520	12835	12835_1
RirG010530
RirG010540
RirG010550	101	101_4
RirG010560	3745	3745_1	GO:0005515=>protein binding=>sds3_bovin ame: full=sin3 histone deacetylase corepressor complex component sds3 ame: full=suppressor of defective silencing 3 protein homolog;GO:0009987=>cellular process=>sds3_bovin ame: full=sin3 histone deacetylase corepressor complex component sds3 ame: full=suppressor of defective silencing 3 protein homolog);	PF08598=>Sds3-like;	IPR013907 (Sds3-like)
RirG010570	11169	11169_1
RirG010580	11169	11169_1
RirG010590	5325	5325_1		PF10350=>Putative death-receptor fusion protein (DUF2428);	IPR016024 (Armadillo-type fold; IPR019442 (Domain of unknown function DUF2428, death-receptor-like)
RirG010600	10171	10171_1		PF00092=>von Willebrand factor type A domain;	IPR002035 (von Willebrand factor, type A)
RirG010610
RirG010620	5743	5743_1		PF07779=>10 TM Acyl Transferase domain found in Cas1p;	IPR012419 (Cas1p-like)
RirG010630	11762	11762_1	GO:0009987=>cellular process=>nica_dicdi ame: full=nicastrin flags: precursor;GO:0016020=>membrane=>nica_dicdi ame: full=nicastrin flags: precursor;GO:0019538=>protein metabolic process=>nica_dicdi ame: full=nicastrin flags: precursor;GO:0043231=>intracellular membrane-bounded organelle=>nica_dicdi ame: full=nicastrin flags: precursor;GO:0044444=>cytoplasmic part=>nica_dicdi ame: full=nicastrin f…	PF05450=>Nicastrin;	IPR008710 (Nicastrin)
RirG010640	6108	6108_1
RirG010650	6108	6108_1
RirG010660	6108	6108_1
RirG010670	14923	14923_1			IPR011991 (Winged helix-turn-helix transcription repressor DNA-binding)
RirG010680	14784	14784_1
RirG010690	14923	14923_1			IPR011991 (Winged helix-turn-helix transcription repressor DNA-binding)
RirG010700	14784	14784_1
RirG010710					IPR010093 (Excisionase/Xis, DNA-binding)
RirG010720	1	1_7		PF00078=>Reverse transcriptase (RNA-dependent DNA polymerase);	IPR015706 (RNA-directed DNA polymerase (reverse transcriptase))
RirG010730	14819	14819_1
RirG010740
RirG010750
RirG010760	11241	11241_1		PF05732=>Firmicute plasmid replication protein (RepL);	IPR008813 (Plasmid replication protein, RepL)
RirG010770	1	1_93
RirG010780			GO:0004148=>dihydrolipoyl dehydrogenase activity=>dldh_yeast ame: full=dihydrolipoyl mitochondrial ame: full=dihydrolipoamide dehydrogenase ame: full=glycine decarboxylase complex subunit l ame: full=lipoamide dehydrogenase component of pyruvate dehydrogenase complex ame: full=pyruvate dehydrogenase complex e3 component flags: precursor;GO:0005507=>copper ion binding=>dldh_yeast ame: full=dihydro…	PF02852=>Pyridine nucleotide-disulphide oxidoreductase;dimerisation domain;	IPR006258 (Dihydrolipoamide dehydrogenase; IPR016156 (FAD/NAD-linked reductase, dimerisation)
RirG010790	314	314_1
RirG010800			GO:0000902=>cell morphogenesis=>sly1_schpo ame: full=protein sly1;GO:0001666=>response to hypoxia=>sly1_schpo ame: full=protein sly1;GO:0005798=>Golgi-associated vesicle=>sly1_schpo ame: full=protein sly1;GO:0005801=>cis-Golgi network=>sly1_schpo ame: full=protein sly1;GO:0005829=>cytosol=>sly1_schpo ame: full=protein sly1;GO:0005886=>plasma membrane=>sly1_schpo ame: full=protein sly1;GO:0006890=…	PF00995=>Sec1 family;	IPR001619 (Sec1-like protein)
RirG010810	6895	6895_1	GO:0000776=>kinetochore=>acap2_rabit ame: full=arf-gap with coiled- ank repeat and ph domain-containing protein 2 ame: full=centaurin-beta-2 short=cnt-b2;GO:0004857=>enzyme inhibitor activity=>acap2_rabit ame: full=arf-gap with coiled- ank repeat and ph domain-containing protein 2 ame: full=centaurin-beta-2 short=cnt-b2;GO:0005813=>centrosome=>acap2_rabit ame: full=arf-gap with coiled- ank repeat…		IPR020683 (Ankyrin repeat-containing domain)
RirG010820	1267	1267_1			IPR002078 (RNA polymerase sigma factor 54, interaction)
RirG010830	14839	14839_1
RirG010840	90	90_4
RirG010850	4914	4914_1		PF00505=>HMG (high mobility group) box;	IPR009071 (High mobility group, superfamily)
RirG010860	664	664_1
RirG010870	22	22_3			IPR020685 (Tyrosine-protein kinase)
RirG010880	6549	6549_1			IPR011990 (Tetratricopeptide-like helical)
RirG010890	13	13_4	GO:0000186=>activation of MAPKK activity=>y9957_dicdi ame: full=probable serine threonine-protein kinase ddb_g0276181;GO:0000187=>activation of MAPK activity=>y9957_dicdi ame: full=probable serine threonine-protein kinase ddb_g0276181;GO:0001525=>angiogenesis=>y9957_dicdi ame: full=probable serine threonine-protein kinase ddb_g0276181;GO:0001841=>neural tube formation=>y9957_dicdi ame: full=proba…	PF07714=>Protein tyrosine kinase;	IPR011009 (Protein kinase-like domain)
RirG010900			GO:0000166=>nucleotide binding=>abcbb_mouse ame: full=bile salt export pump ame: full=atp-binding cassette sub-family b member 11 ame: full=sister of p-glycoprotein;GO:0005634=>nucleus=>abcbb_mouse ame: full=bile salt export pump ame: full=atp-binding cassette sub-family b member 11 ame: full=sister of p-glycoprotein;GO:0006200=>ATP catabolic process=>abcbb_mouse ame: full=bile salt export pump a…	PF00664=>ABC transporter transmembrane region;	IPR011527 (ABC transporter, transmembrane domain, type 1)
RirG010910	104	104_2	GO:0001819=>positive regulation of cytokine production=>yr818_mimiv ame: full= serine threonine-protein kinase receptor r818 flags: precursor;GO:0002224=>toll-like receptor signaling pathway=>yr818_mimiv ame: full= serine threonine-protein kinase receptor r818 flags: precursor;GO:0002275=>myeloid cell activation involved in immune response=>yr818_mimiv ame: full= serine threonine-protein kinase r…	PF07714=>Protein tyrosine kinase;	IPR011009 (Protein kinase-like domain)
RirG010920	664	664_1
RirG010930
RirG010940			GO:0005524=>ATP binding=>ycf2_arath ame: full=protein ycf2;GO:0009570=>chloroplast stroma=>ycf2_arath ame: full=protein ycf2;GO:0009941=>chloroplast envelope=>ycf2_arath ame: full=protein ycf2;GO:0016020=>membrane=>ycf2_arath ame: full=protein ycf2;GO:0017111=>nucleoside-triphosphatase activity=>ycf2_arath ame: full=protein ycf2);	PF00004=>ATPase family associated with various cellular activities (AAA);PF05695=>Plant protein of unknown function (DUF825);	IPR003593 (ATPase, AAA+ type, core; IPR008543 (Uncharacterised protein family Ycf2)
RirG010950	54	54_2
RirG010960	2512	2512_1
RirG010970	5245	5245_1
RirG010980	15	15_30
RirG010990	26	26_7
RirG011000	32	32_3
RirG011010	12741	12741_1
RirG011020	24	24_1
RirG011030	6910	6910_1
RirG011040	2112	2112_1
RirG011050
RirG011060	9013	9013_1
RirG011070	2850	2850_1
RirG011080	14989	14989_1
RirG011090	118	118_1
RirG011100
RirG011110	1	1_15		PF00075=>RNase H;	IPR012337 (Ribonuclease H-like)
RirG011120
RirG011130	35	35_2
RirG011140	15116	15116_1
RirG011150	14792	14792_1		PF01076=>Plasmid recombination enzyme;	IPR001668 (Plasmid recombination enzyme)
RirG011160	11149	11149_1		PF01446=>Replication protein;	IPR000989 (Replication protein)
RirG011170	4946	4946_1
RirG011180	5837	5837_1
RirG011190	6101	6101_1	GO:0009987=>cellular process=>ybeq_ecoli ame: full=uncharacterized protein;GO:0050896=>response to stimulus=>ybeq_ecoli ame: full=uncharacterized protein);	PF08238=>Sel1 repeat;	IPR011990 (Tetratricopeptide-like helical)
RirG011200	11246	11246_1
RirG011210
RirG011220
RirG011230
RirG011240
RirG011250	1	1_102		PF00075=>RNase H;	IPR012337 (Ribonuclease H-like)
RirG011260	7416	7416_1
RirG011270
RirG011280	90	90_10
RirG011290			GO:0006139=>nucleobase-containing compound metabolic process=>rir2_chltr ame: full=ribonucleoside-diphosphate reductase subunit beta ame: full=ribonucleotide reductase small subunit;GO:0016491=>oxidoreductase activity=>rir2_chltr ame: full=ribonucleoside-diphosphate reductase subunit beta ame: full=ribonucleotide reductase small subunit;GO:0046872=>metal ion binding=>rir2_chltr ame: full=ribonucl…		IPR000358 (Ribonucleotide reductase; IPR009078 (Ferritin/ribonucleotide reductase-like)
RirG011300
RirG011310
RirG011320	69	69_2	GO:0016491=>oxidoreductase activity=>cp4d2_drome ame: full=cytochrome p450 4d2 ame: full=cypivd2);	PF00067=>Cytochrome P450;	IPR001128 (Cytochrome P450)
RirG011330	394	394_1
RirG011340	1	1_111
RirG011350	1	1_144
RirG011360	9086	9086_1
RirG011370	2482	2482_1
RirG011380
RirG011390
RirG011400	885	885_1
RirG011410
RirG011420	15058	15058_1		PF00717=>Peptidase S24-like;PF01381=>Helix-turn-helix;	IPR010982 (Lambda repressor-like, DNA-binding; IPR011056 (Peptidase S24/S26A/S26B/S26C, beta-ribbon domain; IPR015927 (Peptidase S24/S26A/S26B/S26C)
RirG011430				PF01381=>Helix-turn-helix;	IPR001387 (Helix-turn-helix type 3)
RirG011440
RirG011450
RirG011460	3727	3727_1		PF00137=>ATP synthase subunit C;	IPR002379 (ATPase, F0/V0 complex, subunit C)
RirG011470				PF01933=>Uncharacterised protein family UPF0052;	IPR002882 (LPPG:FO 2-phospho-L-lactate transferase CofD/UPF0052)
RirG011480	632	632_1	GO:0003824=>catalytic activity=>moaa_ecoli ame: full=molybdenum cofactor biosynthesis protein a;GO:0005525=>GTP binding=>moaa_ecoli ame: full=molybdenum cofactor biosynthesis protein a;GO:0006777=>Mo-molybdopterin cofactor biosynthetic process=>moaa_ecoli ame: full=molybdenum cofactor biosynthesis protein a;GO:0019008=>molybdopterin synthase complex=>moaa_ecoli ame: full=molybdenum cofactor biosy…	PF04055=>Radical SAM superfamily;PF06463=>Molybdenum Cofactor Synthesis C;	IPR007197 (Radical SAM; IPR013483 (Molybdenum cofactor biosynthesis protein A)
RirG011490			GO:0005525=>GTP binding=>moab_eco57 ame: full=molybdenum cofactor biosynthesis protein b;GO:0006777=>Mo-molybdopterin cofactor biosynthetic process=>moab_eco57 ame: full=molybdenum cofactor biosynthesis protein b;GO:0044464=>cell part=>moab_eco57 ame: full=molybdenum cofactor biosynthesis protein b);	PF00994=>Probable molybdopterin binding domain;	IPR012245 (Molybdenum cofactor biosynthesis protein MoaB)
RirG011500
RirG011510	24	24_14
RirG011520
RirG011530
RirG011540	3297	3297_1
RirG011550	3705	3705_1
RirG011560	7599	7599_1		PF08729=>Hpc2-related domain;	IPR014840 (Histone promoter control 2 (HPC2))
RirG011570	2692	2692_1		PF06003=>Survival motor neuron protein (SMN);	IPR002999 (Tudor domain)
RirG011580	16	16_1
RirG011590
RirG011600	1503	1503_1	GO:0006777=>Mo-molybdopterin cofactor biosynthetic process=>moae_ecoli ame: full=molybdopterin synthase catalytic subunit ame: full=mpt synthase subunit 2 ame: full=molybdenum cofactor biosynthesis protein e ame: full=molybdopterin-converting factor large subunit ame: full=molybdopterin-converting factor subunit 2;GO:0016740=>transferase activity=>moae_ecoli ame: full=molybdopterin synthase catal…	PF02391=>MoaE protein;	IPR003448 (Molybdopterin biosynthesis MoaE)
RirG011610			GO:0003700=>sequence-specific DNA binding transcription factor activity=>nrfa_penur ame: full=nitrogen regulatory protein nrfa;GO:0005515=>protein binding=>nrfa_penur ame: full=nitrogen regulatory protein nrfa;GO:0005634=>nucleus=>nrfa_penur ame: full=nitrogen regulatory protein nrfa;GO:0006355=>regulation of transcription, DNA-dependent=>nrfa_penur ame: full=nitrogen regulatory protein nrfa;GO:0…	PF08550=>Fungal protein of unknown function (DUF1752);	IPR013860 (Protein of unknown function DUF1752, fungi)
RirG011620
RirG011630
RirG011640	11149	11149_1
RirG011650	1280	1280_1		PF07728=>AAA domain (dynein-related subfamily);	IPR011704 (ATPase, AAA-5)
RirG011660	3750	3750_1	GO:0005488=>binding=>yfi5_schpo ame: full=fas1 domain-containing protein flags: precursor;GO:0009987=>cellular process=>yfi5_schpo ame: full=fas1 domain-containing protein flags: precursor;GO:0031012=>extracellular matrix=>yfi5_schpo ame: full=fas1 domain-containing protein flags: precursor;GO:0044421=>extracellular region part=>yfi5_schpo ame: full=fas1 domain-containing protein flags: precursor…	PF02469=>Fasciclin domain;	IPR000782 (FAS1 domain)
RirG011670	87	87_15
RirG011680	8	8_11	GO:0000166=>nucleotide binding=>y9957_dicdi ame: full=probable serine threonine-protein kinase ddb_g0276181;GO:0001819=>positive regulation of cytokine production=>y9957_dicdi ame: full=probable serine threonine-protein kinase ddb_g0276181;GO:0002224=>toll-like receptor signaling pathway=>y9957_dicdi ame: full=probable serine threonine-protein kinase ddb_g0276181;GO:0004674=>protein serine/threon…	PF07714=>Protein tyrosine kinase;	IPR011009 (Protein kinase-like domain)
RirG011690	1	1_37
RirG011700	15032	15032_1
RirG011710	15032	15032_1
RirG011720				PF01047=>MarR family;	IPR000835 (HTH transcriptional regulator, MarR)
RirG011730	14973	14973_1
RirG011740	1	1_38
RirG011750			GO:0000389=>mRNA 3'-splice site recognition=>sa114_schpo ame: full=pre-mrna-splicing factor sap114 ame: full=spliceosome-associated protein 145;GO:0003723=>RNA binding=>sa114_schpo ame: full=pre-mrna-splicing factor sap114 ame: full=spliceosome-associated protein 145;GO:0005515=>protein binding=>sa114_schpo ame: full=pre-mrna-splicing factor sap114 ame: full=spliceosome-associated protein 145;GO:…	PF01805=>Surp module;	IPR000061 (SWAP/Surp)
RirG011760	14946	14946_1
RirG011770	16	16_52
RirG011780	16	16_1
RirG011790	2065	2065_1		PF02893=>GRAM domain;	IPR004182 (GRAM)
RirG011800	950	950_1	GO:0009987=>cellular process=>kbtba_rat ame: full=kelch repeat and btb domain-containing protein 10 ame: full=kel-like protein 23 ame: full=kelch-related protein 1 ame: full=sarcosin;GO:0044424=>intracellular part=>kbtba_rat ame: full=kelch repeat and btb domain-containing protein 10 ame: full=kel-like protein 23 ame: full=kelch-related protein 1 ame: full=sarcosin);	PF00651=>BTB/POZ domain;PF07534=>TLD;	IPR011333 (BTB/POZ fold; IPR013089 (Kelch-related)
RirG011810
RirG011820	5367	5367_1	GO:0000775=>chromosome, centromeric region=>tmf1_human ame: full=tata element modulatory factor short=tmf ame: full=androgen receptor coactivator 160 kda protein ame: full=androgen receptor-associated protein of 160 kda;GO:0005515=>protein binding=>tmf1_human ame: full=tata element modulatory factor short=tmf ame: full=androgen receptor coactivator 160 kda protein ame: full=androgen receptor-asso…	PF12325=>TATA element modulatory factor 1 TATA binding;PF12329=>TATA element modulatory factor 1 DNA binding;	IPR022091 (TATA element modulatory factor 1 TATA binding; IPR022092 (TATA element modulatory factor 1 DNA binding)
RirG011830	55	55_1
RirG011840			GO:0001968=>fibronectin binding=>comp_human ame: full=cartilage oligomeric matrix protein short=comp ame: full=thrombospondin-5 short=tsp5 flags: precursor;GO:0003417=>growth plate cartilage development=>comp_human ame: full=cartilage oligomeric matrix protein short=comp ame: full=thrombospondin-5 short=tsp5 flags: precursor;GO:0005201=>extracellular matrix structural constituent=>comp_human ame:…		IPR000601 (PKD domain; IPR008930 (Terpenoid cylases/protein prenyltransferase alpha-alpha toroid; IPR013830 (Esterase, SGNH hydrolase-type)
RirG011850
RirG011860	113	113_1
RirG011870
RirG011880	41	41_26
RirG011890	315	315_1			IPR012296 (Nuclease, putative, TT1808)
RirG011900	41	41_1
RirG011910				PF08238=>Sel1 repeat;	IPR011990 (Tetratricopeptide-like helical)
RirG011920	4605	4605_1	GO:0005739=>mitochondrion=>cyb_rhior ame: full=cytochrome b ame: full=complex iii subunit 3 ame: full=complex iii subunit iii ame: full=cytochrome b-c1 complex subunit 3 ame: full=ubiquinol-cytochrome-c reductase complex cytochrome b subunit;GO:0022900=>electron transport chain=>cyb_rhior ame: full=cytochrome b ame: full=complex iii subunit 3 ame: full=complex iii subunit iii ame: full=cytochrome…	PF00032=>Cytochrome b(C-terminal)/b6/petD;	IPR016175 (Cytochrome b/b6)
RirG011930	316	316_1
RirG011940
RirG011950
RirG011960	287	287_2
RirG011970
RirG011980	3727	3727_1		PF00137=>ATP synthase subunit C;	IPR002379 (ATPase, F0/V0 complex, subunit C)
RirG011990
RirG012000	599	599_1
RirG012010				PF00569=>Zinc finger;ZZ type;	IPR000433 (Zinc finger, ZZ-type)
RirG012020	3727	3727_1		PF00137=>ATP synthase subunit C;	IPR002379 (ATPase, F0/V0 complex, subunit C)
RirG012030
RirG012040				PF00098=>Zinc knuckle;	IPR001878 (Zinc finger, CCHC-type)
RirG012050				PF00173=>Cytochrome b5-like Heme/Steroid binding domain;	IPR001199 (Cytochrome b5)
RirG012060	1	1_139			IPR002156 (Ribonuclease H domain)
RirG012070	6574	6574_1			IPR011991 (Winged helix-turn-helix transcription repressor DNA-binding)
RirG012080	6550	6550_1
RirG012090	4338	4338_1
RirG012100
RirG012110
RirG012120	18	18_8		PF07534=>TLD;	IPR013089 (Kelch-related)
RirG012130	1	1_5	GO:0003824=>catalytic activity=>po22_popja ame: full=retrovirus-related pol polyprotein from type-1 retrotransposable element r2 ame: full=retrovirus-related pol polyprotein from type i retrotransposable element r2 includes: ame: full=reverse transcriptase includes: ame: full=endonuclease);	PF00078=>Reverse transcriptase (RNA-dependent DNA polymerase);	IPR015706 (RNA-directed DNA polymerase (reverse transcriptase))
RirG012140	1	1_9		PF03372=>Endonuclease/Exonuclease/phosphatase family;	IPR005135 (Endonuclease/exonuclease/phosphatase)
RirG012150	15	15_37
RirG012160
RirG012170
RirG012180
RirG012190				PF00023=>Ankyrin repeat;	IPR020683 (Ankyrin repeat-containing domain)
RirG012200	6574	6574_1		PF05732=>Firmicute plasmid replication protein (RepL);	IPR008813 (Plasmid replication protein, RepL)
RirG012210
RirG012220	11149	11149_1
RirG012230
RirG012240
RirG012250
RirG012260
RirG012270
RirG012280	41	41_1
RirG012290	46	46_1
RirG012300
RirG012310			GO:0005747=>mitochondrial respiratory chain complex I=>nu4m_ustma ame: full=nadh-ubiquinone oxidoreductase chain 4 ame: full=nadh dehydrogenase subunit 4;GO:0005886=>plasma membrane=>nu4m_ustma ame: full=nadh-ubiquinone oxidoreductase chain 4 ame: full=nadh dehydrogenase subunit 4;GO:0006120=>mitochondrial electron transport, NADH to ubiquinone=>nu4m_ustma ame: full=nadh-ubiquinone oxidoreductase…	PF00361=>NADH-Ubiquinone/plastoquinone (complex I);various chains;	IPR001750 (NADH:ubiquinone/plastoquinone oxidoreductase)
RirG012320
RirG012330	7224	7224_1	GO:0005886=>plasma membrane=>ybar_bacsu ame: full= sulfate transporter ybar;GO:0008509=>anion transmembrane transporter activity=>ybar_bacsu ame: full= sulfate transporter ybar;GO:0009987=>cellular process=>ybar_bacsu ame: full= sulfate transporter ybar;GO:0015291=>secondary active transmembrane transporter activity=>ybar_bacsu ame: full= sulfate transporter ybar;GO:0015698=>inorganic anion trans…	PF00916=>Sulfate transporter family;PF01740=>STAS domain;	IPR002645 (Sulphate transporter/antisigma-factor antagonist STAS; IPR011547 (Sulphate transporter; IPR018045 (Sulphate anion transporter, conserved site)
RirG012340				PF00582=>Universal stress protein family;	IPR006015 (Universal stress protein A)
RirG012350
RirG012360	7428	7428_1		PF01051=>Initiator Replication protein;	IPR000525 (Initiator Rep protein)
RirG012370	6891	6891_1	GO:0003824=>catalytic activity=>rlx1_salty ame: full=43 kda relaxation protein;GO:0097159=>organic cyclic compound binding=>rlx1_salty ame: full=43 kda relaxation protein;GO:1901363=>heterocyclic compound binding=>rlx1_salty ame: full=43 kda relaxation protein);	PF03389=>MobA/MobL family;	IPR005053 (MobA/MobL protein)
RirG012380
RirG012390	4708	4708_1			IPR016024 (Armadillo-type fold)
RirG012400	961	961_1		PF10250=>GDP-fucose protein O-fucosyltransferase;	IPR019378 (GDP-fucose protein O-fucosyltransferase)
RirG012410
RirG012420	44	44_1
RirG012430	706	706_1	GO:0000910=>cytokinesis=>prof2_acaca ame: full=profilin-2 ame: full=basic profilin ame: full=profilin ii;GO:0003785=>actin monomer binding=>prof2_acaca ame: full=profilin-2 ame: full=basic profilin ame: full=profilin ii;GO:0003824=>catalytic activity=>prof2_acaca ame: full=profilin-2 ame: full=basic profilin ame: full=profilin ii;GO:0005159=>insulin-like growth factor receptor binding=>prof2_acac…	PF00235=>Profilin;	IPR002097 (Profilin/allergen)
RirG012440	6586	6586_1
RirG012450	1259	1259_1		PF00043=>Glutathione S-transferase;C-terminal domain;PF02798=>Glutathione S-transferase;N-terminal domain;	IPR010987 (Glutathione S-transferase, C-terminal-like; IPR012336 (Thioredoxin-like fold)
RirG012460	1259	1259_1	GO:0003824=>catalytic activity=>yfcg_ecoli ame: full=probable disulfide bond reductase ame: full=gst-like protein);	PF00043=>Glutathione S-transferase;C-terminal domain;PF02798=>Glutathione S-transferase;N-terminal domain;	IPR010987 (Glutathione S-transferase, C-terminal-like; IPR012336 (Thioredoxin-like fold)
RirG012470	1259	1259_1	GO:0016740=>transferase activity=>yfcg_ecoli ame: full=probable disulfide bond reductase ame: full=gst-like protein;GO:0044237=>cellular metabolic process=>yfcg_ecoli ame: full=probable disulfide bond reductase ame: full=gst-like protein;GO:0044238=>primary metabolic process=>yfcg_ecoli ame: full=probable disulfide bond reductase ame: full=gst-like protein);	PF00043=>Glutathione S-transferase;C-terminal domain;PF02798=>Glutathione S-transferase;N-terminal domain;	IPR010987 (Glutathione S-transferase, C-terminal-like; IPR012336 (Thioredoxin-like fold)
RirG012480	318	318_2	GO:0000139=>Golgi membrane=>gda1_aspfu ame: full=probable guanosine-diphosphatase short=gdpase;GO:0004382=>guanosine-diphosphatase activity=>gda1_aspfu ame: full=probable guanosine-diphosphatase short=gdpase;GO:0005576=>extracellular region=>gda1_aspfu ame: full=probable guanosine-diphosphatase short=gdpase;GO:0006493=>protein O-linked glycosylation=>gda1_aspfu ame: full=probable guanosine-diphos…	PF01150=>GDA1/CD39 (nucleoside phosphatase) family;	IPR000407 (Nucleoside phosphatase GDA1/CD39)
RirG012490	4587	4587_1		PF11022=>Protein of unknown function (DUF2611);	IPR021278 (Protein of unknown function DUF2611)
RirG012500	6717	6717_1	GO:0006464=>cellular protein modification process=>fbxl2_bovin ame: full=f-box lrr-repeat protein 2 ame: full=f-box and leucine-rich repeat protein 2;GO:0043229=>intracellular organelle=>fbxl2_bovin ame: full=f-box lrr-repeat protein 2 ame: full=f-box and leucine-rich repeat protein 2);	PF00646=>F-box domain;	IPR006553 (Leucine-rich repeat, cysteine-containing subtype; IPR011990 (Tetratricopeptide-like helical; IPR022364 (F-box domain, Skp2-like)
RirG012510			GO:0005488=>binding=>vat1_danre ame: full=synaptic vesicle membrane protein vat-1 homolog;GO:0006631=>fatty acid metabolic process=>vat1_danre ame: full=synaptic vesicle membrane protein vat-1 homolog;GO:0008610=>lipid biosynthetic process=>vat1_danre ame: full=synaptic vesicle membrane protein vat-1 homolog;GO:0016020=>membrane=>vat1_danre ame: full=synaptic vesicle membrane protein vat-1 homolo…	PF00107=>Zinc-binding dehydrogenase;PF08240=>Alcohol dehydrogenase GroES-like domain;	IPR002085 (Alcohol dehydrogenase superfamily, zinc-containing; IPR020843 (Polyketide synthase, enoylreductase)
RirG012520	6880	6880_1		PF08642=>Histone deacetylation protein Rxt3;	IPR013951 (Histone deacetylation protein Rxt3)
RirG012530	6880	6880_1		PF08642=>Histone deacetylation protein Rxt3;	IPR013951 (Histone deacetylation protein Rxt3)
RirG012540
RirG012550	1	1_77
RirG012560	12804	12804_1	GO:0000166=>nucleotide binding=>p1_arath ame: full=nadp-dependent alkenal double bond reductase p1 short=dbr1;GO:0005737=>cytoplasm=>p1_arath ame: full=nadp-dependent alkenal double bond reductase p1 short=dbr1;GO:0006720=>isoprenoid metabolic process=>p1_arath ame: full=nadp-dependent alkenal double bond reductase p1 short=dbr1;GO:0016628=>oxidoreductase activity, acting on the CH-CH group of do…		IPR002085 (Alcohol dehydrogenase superfamily, zinc-containing; IPR011032 (GroES-like)
RirG012570	4352	4352_1
RirG012580	14920	14920_1
RirG012590
RirG012600	12789	12789_1	GO:0001510=>RNA methylation=>k0020_rat ame: full=pumilio domain-containing protein kiaa0020 homolog;GO:0005730=>nucleolus=>k0020_rat ame: full=pumilio domain-containing protein kiaa0020 homolog;GO:0005783=>endoplasmic reticulum=>k0020_rat ame: full=pumilio domain-containing protein kiaa0020 homolog;GO:0005829=>cytosol=>k0020_rat ame: full=pumilio domain-containing protein kiaa0020 homolog;GO:0006…		IPR016024 (Armadillo-type fold)
RirG012610	2226	2226_1	GO:0005215=>transporter activity=>sec22_schpo ame: full=protein transport protein sec22;GO:0005515=>protein binding=>sec22_schpo ame: full=protein transport protein sec22;GO:0005783=>endoplasmic reticulum=>sec22_schpo ame: full=protein transport protein sec22;GO:0005793=>endoplasmic reticulum-Golgi intermediate compartment=>sec22_schpo ame: full=protein transport protein sec22;GO:0005794=>Golgi a…	PF00957=>Synaptobrevin;	IPR001388 (Synaptobrevin)
RirG012620	725	725_1	GO:0001701=>in utero embryonic development=>icmt_human ame: full=protein-s-isoprenylcysteine o-methyltransferase ame: full=isoprenylcysteine carboxylmethyltransferase ame: full=prenylated protein carboxyl methyltransferase short=ppmt ame: full=prenylcysteine carboxyl methyltransferase short=pccmt;GO:0001889=>liver development=>icmt_human ame: full=protein-s-isoprenylcysteine o-methyltransferase a…	PF04140=>Isoprenylcysteine carboxyl methyltransferase (ICMT) family ;	IPR007269 (Isoprenylcysteine carboxyl methyltransferase)
RirG012630	940	940_1	GO:0000209=>protein polyubiquitination=>cwc27_rhio9 ame: full=peptidyl-prolyl isomerase cwc27 short=ppiase cwc27 ame: full=rotamase cwc27;GO:0005681=>spliceosomal complex=>cwc27_rhio9 ame: full=peptidyl-prolyl isomerase cwc27 short=ppiase cwc27 ame: full=rotamase cwc27;GO:0005730=>nucleolus=>cwc27_rhio9 ame: full=peptidyl-prolyl isomerase cwc27 short=ppiase cwc27 ame: full=rotamase cwc27;GO:00057…	PF00160=>Cyclophilin type peptidyl-prolyl cis-trans isomerase/CLD;	IPR015891 (Cyclophilin-like)
RirG012640	5998	5998_1	GO:0007275=>multicellular organismal development=>upps_schpo ame: full=probable undecaprenyl pyrophosphate synthase short=upp synthase ame: full=di- -cis-decaprenylcistransferase ame: full=undecaprenyl diphosphate synthase short=uds);	PF01255=>Putative undecaprenyl diphosphate synthase;	IPR001441 (Di-trans-poly-cis-decaprenylcistransferase-like)
RirG012650	8894	8894_1		PF00339=>Arrestin (or S-antigen);N-terminal domain;PF02752=>Arrestin (or S-antigen);C-terminal domain;	IPR011021 (Arrestin-like, N-terminal; IPR011022 (Arrestin-like, C-terminal; IPR014756 (Immunoglobulin E-set)
RirG012660	11147	11147_1
RirG012670	24	24_10			IPR012337 (Ribonuclease H-like)
RirG012680	2594	2594_1	GO:0005783=>endoplasmic reticulum=>erv14_yeast ame: full=er-derived vesicles protein erv14;GO:0005887=>integral to plasma membrane=>erv14_yeast ame: full=er-derived vesicles protein erv14;GO:0006888=>ER to Golgi vesicle-mediated transport=>erv14_yeast ame: full=er-derived vesicles protein erv14;GO:0007166=>cell surface receptor signaling pathway=>erv14_yeast ame: full=er-derived vesicles protein …	PF03311=>Cornichon protein;	IPR003377 (Cornichon)
RirG012690	6522	6522_1
RirG012700	4920	4920_1		PF03330=>Rare lipoprotein A (RlpA)-like double-psi beta-barrel;	IPR014733 (Barwin-like endoglucanase)
RirG012710	4936	4936_1		PF06437=>IMP-specific 5'-nucleotidase;	IPR009453 (IMP-specific 5-nucleotidase; IPR023214 (HAD-like domain)
RirG012720	1	1_36
RirG012730	1	1_1
RirG012740	3217	3217_1
RirG012750	3217	3217_1
RirG012760	13	13_2	GO:0005488=>binding=>y9955_dicdi ame: full=probable serine threonine-protein kinase ddb_g0267514;GO:0005622=>intracellular=>y9955_dicdi ame: full=probable serine threonine-protein kinase ddb_g0267514;GO:0009987=>cellular process=>y9955_dicdi ame: full=probable serine threonine-protein kinase ddb_g0267514;GO:0016301=>kinase activity=>y9955_dicdi ame: full=probable serine threonine-protein kinase d…	PF07714=>Protein tyrosine kinase;	IPR011009 (Protein kinase-like domain)
RirG012770	94	94_1
RirG012780	94	94_2	GO:0000278=>mitotic cell cycle=>cdc27_bovin ame: full=cell division cycle protein 27 homolog;GO:0003008=>system process=>cdc27_bovin ame: full=cell division cycle protein 27 homolog;GO:0005515=>protein binding=>cdc27_bovin ame: full=cell division cycle protein 27 homolog;GO:0005634=>nucleus=>cdc27_bovin ame: full=cell division cycle protein 27 homolog;GO:0005813=>centrosome=>cdc27_bovin ame: full…		IPR011990 (Tetratricopeptide-like helical; IPR013083 (Zinc finger, RING/FYVE/PHD-type)
RirG012790	94	94_2	GO:0000278=>mitotic cell cycle=>y798_metja ame: full=tpr repeat-containing protein mj0798;GO:0005634=>nucleus=>y798_metja ame: full=tpr repeat-containing protein mj0798;GO:0016567=>protein ubiquitination=>y798_metja ame: full=tpr repeat-containing protein mj0798;GO:0022402=>cell cycle process=>y798_metja ame: full=tpr repeat-containing protein mj0798;GO:0043232=>intracellular non-membrane-bounded…		IPR011990 (Tetratricopeptide-like helical; IPR013083 (Zinc finger, RING/FYVE/PHD-type)
RirG012800	2542	2542_1
RirG012810	2542	2542_1
RirG012820
RirG012830	48	48_6
RirG012840	5535	5535_1
RirG012850	190	190_1
RirG012860					IPR001816 (Translation elongation factor EFTs/EF1B)
RirG012870	7623	7623_1	GO:0044424=>intracellular part=>efts_lacbs ame: full=elongation factor mitochondrial short=ef-ts short=ef- t flags: precursor);	PF00889=>Elongation factor TS;	IPR001816 (Translation elongation factor EFTs/EF1B)
RirG012880	11732	11732_1		PF04884=>Protein of unknown function (DUF647);	IPR006968 (Protein of unknown function DUF647)
RirG012890
RirG012900	1973	1973_1	GO:0000166=>nucleotide binding=>sec63_schpo ame: full=translocation protein sec63;GO:0003006=>developmental process involved in reproduction=>sec63_schpo ame: full=translocation protein sec63;GO:0005515=>protein binding=>sec63_schpo ame: full=translocation protein sec63;GO:0006259=>DNA metabolic process=>sec63_schpo ame: full=translocation protein sec63;GO:0006810=>transport=>sec63_schpo ame: ful…	PF00226=>DnaJ domain;PF02889=>Sec63 Brl domain;	IPR004179 (Sec63 domain; IPR015609 (Molecular chaperone, heat shock protein, Hsp40, DnaJ; IPR023290 (Sec63-domain)
RirG012910	1134	1134_1	GO:0002119=>nematode larval development=>gys_neucr ame: full=glycogen synthase;GO:0004373=>glycogen (starch) synthase activity=>gys_neucr ame: full=glycogen synthase;GO:0005536=>glucose binding=>gys_neucr ame: full=glycogen synthase;GO:0005829=>cytosol=>gys_neucr ame: full=glycogen synthase;GO:0005978=>glycogen biosynthetic process=>gys_neucr ame: full=glycogen synthase;GO:0006006=>glucose metabo…	PF05693=>Glycogen synthase;	IPR008631 (Glycogen synthase)
RirG012920
RirG012930	9874	9874_1		PF03894=>D-xylulose 5-phosphate/D-fructose 6-phosphate phosphoketolase;PF09363=>XFP C-terminal domain;PF09364=>XFP N-terminal domain;	IPR005593 (Xylulose 5-phosphate/Fructose 6-phosphate phosphoketolase)
RirG012940	999	999_1	GO:0000209=>protein polyubiquitination=>tom1_neucr ame: full=e3 ubiquitin-protein ligase tom1-like;GO:0003677=>DNA binding=>tom1_neucr ame: full=e3 ubiquitin-protein ligase tom1-like;GO:0004842=>ubiquitin-protein ligase activity=>tom1_neucr ame: full=e3 ubiquitin-protein ligase tom1-like;GO:0005515=>protein binding=>tom1_neucr ame: full=e3 ubiquitin-protein ligase tom1-like;GO:0005730=>nucleolus=…	PF00632=>HECT-domain (ubiquitin-transferase);	IPR000569 (HECT)
RirG012950	104	104_2	GO:0002684=>positive regulation of immune system process=>y1199_dicdi ame: full=probable serine threonine-protein kinase ddb_g0282895;GO:0005003=>ephrin receptor activity=>y1199_dicdi ame: full=probable serine threonine-protein kinase ddb_g0282895;GO:0005102=>receptor binding=>y1199_dicdi ame: full=probable serine threonine-protein kinase ddb_g0282895;GO:0006468=>protein phosphorylation=>y1199_di…	PF07714=>Protein tyrosine kinase;	IPR011009 (Protein kinase-like domain)
RirG012960	2476	2476_1
RirG012970	11143	11143_1
RirG012980	125	125_1
RirG012990	4364	4364_1
RirG013000
RirG013010	161	161_5	GO:0003824=>catalytic activity=>rn213_mouse ame: full=e3 ubiquitin-protein ligase rnf213);	PF00004=>ATPase family associated with various cellular activities (AAA);	IPR003593 (ATPase, AAA+ type, core)
RirG013020	161	161_2
RirG013030	7422	7422_1
RirG013040	3271	3271_1		PF01498=>Transposase;	IPR002492 (Transposase, Tc1-like; IPR009057 (Homeodomain-like)
RirG013050	11228	11228_1
RirG013060	563	563_1	GO:0004197=>cysteine-type endopeptidase activity=>uchl3_mouse ame: full=ubiquitin carboxyl-terminal hydrolase isozyme l3 short=uch-l3 ame: full=ubiquitin thioesterase l3;GO:0004221=>ubiquitin thiolesterase activity=>uchl3_mouse ame: full=ubiquitin carboxyl-terminal hydrolase isozyme l3 short=uch-l3 ame: full=ubiquitin thioesterase l3;GO:0005730=>nucleolus=>uchl3_mouse ame: full=ubiquitin carboxyl…	PF01088=>Ubiquitin carboxyl-terminal hydrolase;family 1;	IPR001578 (Peptidase C12, ubiquitin carboxyl-terminal hydrolase 1)
RirG013070	3725	3725_1
RirG013080	14790	14790_1		PF00505=>HMG (high mobility group) box;	IPR009071 (High mobility group, superfamily)
RirG013090	2948	2948_1		PF03915=>Actin interacting protein 3;	IPR022782 (Actin interacting protein 3, C-terminal)
RirG013100	4903	4903_1
RirG013110	12865	12865_1	GO:0005737=>cytoplasm=>rgpa2_rat ame: full=ral gtpase-activating protein subunit alpha-2 ame: full=250 kda substrate of akt short=as250 ame: full=p220;GO:0019219=>regulation of nucleobase-containing compound metabolic process=>rgpa2_rat ame: full=ral gtpase-activating protein subunit alpha-2 ame: full=250 kda substrate of akt short=as250 ame: full=p220);
RirG013120	35	35_1
RirG013130	449	449_1		PF00646=>F-box domain;	IPR022364 (F-box domain, Skp2-like)
RirG013140	48	48_1
RirG013150
RirG013160	35	35_1
RirG013170	35	35_1
RirG013180	20	20_1
RirG013190	38	38_6
RirG013200	38	38_2
RirG013210	3851	3851_1
RirG013220	4494	4494_1	GO:0003723=>RNA binding=>yl92_schpo ame: full=uncharacterized protein;GO:0005737=>cytoplasm=>yl92_schpo ame: full=uncharacterized protein;GO:0006355=>regulation of transcription, DNA-dependent=>yl92_schpo ame: full=uncharacterized protein;GO:0006950=>response to stress=>yl92_schpo ame: full=uncharacterized protein;GO:0009628=>response to abiotic stimulus=>yl92_schpo ame: full=uncharacterized prot…	PF00098=>Zinc knuckle;	IPR001878 (Zinc finger, CCHC-type)
RirG013230	3352	3352_1
RirG013240	889	889_1	GO:0005488=>binding=>zn271_human ame: full=zinc finger protein 271 ame: full=ct-zfp48 ame: full=epstein-barr virus-induced zinc finger protein short=ebv-induced zinc finger protein short=znf-eb ame: full=zinc finger protein hzf7 ame: full=zinc finger protein znfphex133 ame: full=zinc finger protein dp short=znf-dp;GO:0005622=>intracellular=>zn271_human ame: full=zinc finger protein 271 ame: full=…	PF00096=>Zinc finger;C2H2 type;	IPR013087 (Zinc finger, C2H2-type/integrase, DNA-binding)
RirG013250	889	889_1	GO:0005488=>binding=>zn782_human ame: full=zinc finger protein 782;GO:0005634=>nucleus=>zn782_human ame: full=zinc finger protein 782;GO:0016043=>cellular component organization=>zn782_human ame: full=zinc finger protein 782;GO:0048869=>cellular developmental process=>zn782_human ame: full=zinc finger protein 782;GO:0050794=>regulation of cellular process=>zn782_human ame: full=zinc finger protei…	PF00096=>Zinc finger;C2H2 type;	IPR013087 (Zinc finger, C2H2-type/integrase, DNA-binding)
RirG013260	6240	6240_1	GO:0004519=>endonuclease activity=>endo2_arath ame: full=endonuclease 2 short= 2 ame: full=deoxyribonuclease endo2 ame: full=single-stranded-nucleate endonuclease endo2 flags: precursor;GO:0009987=>cellular process=>endo2_arath ame: full=endonuclease 2 short= 2 ame: full=deoxyribonuclease endo2 ame: full=single-stranded-nucleate endonuclease endo2 flags: precursor;GO:0048437=>floral organ develop…	PF02265=>S1/P1 Nuclease;	IPR008947 (Phospholipase C/P1 nuclease, core)
RirG013270	889	889_1	GO:0001960=>negative regulation of cytokine-mediated signaling pathway=>zn569_human ame: full=zinc finger protein 569;GO:0005515=>protein binding=>zn569_human ame: full=zinc finger protein 569;GO:0005634=>nucleus=>zn569_human ame: full=zinc finger protein 569;GO:0005737=>cytoplasm=>zn569_human ame: full=zinc finger protein 569;GO:0006355=>regulation of transcription, DNA-dependent=>zn569_human am…	PF00096=>Zinc finger;C2H2 type;	IPR013087 (Zinc finger, C2H2-type/integrase, DNA-binding)
RirG013280	1763	1763_1	GO:0004352=>glutamate dehydrogenase (NAD+) activity=>dhe3_dicdi ame: full=glutamate mitochondrial short=gdh flags: precursor;GO:0004353=>glutamate dehydrogenase [NAD(P)+] activity=>dhe3_dicdi ame: full=glutamate mitochondrial short=gdh flags: precursor;GO:0005525=>GTP binding=>dhe3_dicdi ame: full=glutamate mitochondrial short=gdh flags: precursor;GO:0005743=>mitochondrial inner membrane=>dhe3_di…	PF00208=>Glutamate/Leucine/Phenylalanine/Valine dehydrogenase;PF02812=>Glu/Leu/Phe/Val dehydrogenase;dimerisation domain;	IPR006095 (Glutamate/phenylalanine/leucine/valine dehydrogenase; IPR016040 (NAD(P)-binding domain)
RirG013290			GO:0007165=>signal transduction=>gbg_lened ame: full=guanine nucleotide-binding protein subunit gamma flags: precursor;GO:0016020=>membrane=>gbg_lened ame: full=guanine nucleotide-binding protein subunit gamma flags: precursor);	PF00631=>GGL domain;	IPR015898 (G-protein gamma domain)
RirG013300
RirG013310	1637	1637_1	GO:0007059=>chromosome segregation=>cut1_schpo ame: full=separin ame: full=cell untimely torn protein 1 ame: full=separase;GO:0007067=>mitosis=>cut1_schpo ame: full=separin ame: full=cell untimely torn protein 1 ame: full=separase;GO:0016787=>hydrolase activity=>cut1_schpo ame: full=separin ame: full=cell untimely torn protein 1 ame: full=separase;GO:0044424=>intracellular part=>cut1_schpo ame: f…	PF03568=>Peptidase family C50;	IPR005314 (Peptidase C50, separase)
RirG013320
RirG013330	17250	17250_1			IPR011990 (Tetratricopeptide-like helical)
RirG013340	458	458_1	GO:0001726=>ruffle=>vps21_yeast ame: full=vacuolar protein sorting-associated protein 21 ame: full=gtp-binding protein ypt51 ame: full=vacuolar protein-targeting protein 12;GO:0003677=>DNA binding=>vps21_yeast ame: full=vacuolar protein sorting-associated protein 21 ame: full=gtp-binding protein ypt51 ame: full=vacuolar protein-targeting protein 12;GO:0003700=>sequence-specific DNA binding transc…	PF00071=>Ras family;	IPR005225 (Small GTP-binding protein)
RirG013350	4481	4481_1
RirG013360	4303	4303_1	GO:0003723=>RNA binding=>lsm6_human ame: full=u6 snrna-associated sm-like protein lsm6;GO:0005829=>cytosol=>lsm6_human ame: full=u6 snrna-associated sm-like protein lsm6;GO:0006364=>rRNA processing=>lsm6_human ame: full=u6 snrna-associated sm-like protein lsm6;GO:0006397=>mRNA processing=>lsm6_human ame: full=u6 snrna-associated sm-like protein lsm6;GO:0008033=>tRNA processing=>lsm6_human ame: fu…	PF01423=>LSM domain ;	IPR010920 (Like-Sm ribonucleoprotein (LSM)-related domain)
RirG013370	2640	2640_1	GO:0005515=>protein binding=>chmp6_chick ame: full=charged multivesicular body protein 6 ame: full=chromatin-modifying protein 6;GO:0005768=>endosome=>chmp6_chick ame: full=charged multivesicular body protein 6 ame: full=chromatin-modifying protein 6;GO:0006810=>transport=>chmp6_chick ame: full=charged multivesicular body protein 6 ame: full=chromatin-modifying protein 6;GO:0016020=>membrane=>chm…	PF03357=>Snf7;	IPR005024 (Snf7)
RirG013380	935	935_1	GO:0005515=>protein binding=>ist1_rat ame: full=ist1 homolog;GO:0005793=>endoplasmic reticulum-Golgi intermediate compartment=>ist1_rat ame: full=ist1 homolog;GO:0048672=>positive regulation of collateral sprouting=>ist1_rat ame: full=ist1 homolog);	PF03398=>Regulator of Vps4 activity in the MVB pathway;	IPR005061 (Domain of unknown function DUF292, eukaryotic)
RirG013390	2339	2339_1	GO:0000003=>reproduction=>ye42_schpo ame: full= cytochrome c1 heme lyase short=cc1hl;GO:0002119=>nematode larval development=>ye42_schpo ame: full= cytochrome c1 heme lyase short=cc1hl;GO:0005739=>mitochondrion=>ye42_schpo ame: full= cytochrome c1 heme lyase short=cc1hl;GO:0006898=>receptor-mediated endocytosis=>ye42_schpo ame: full= cytochrome c1 heme lyase short=cc1hl;GO:0008340=>determination …	PF01265=>Cytochrome c/c1 heme lyase;	IPR000511 (Cytochrome c/c1 haem-lyase)
RirG013400	3890	3890_1	GO:0004122=>cystathionine beta-synthase activity=>cysk_emeni ame: full=cysteine synthase short=csase ame: full=o-acetylserine -lyase short=oas-tl ame: full=o-acetylserine sulfhydrylase;GO:0004124=>cysteine synthase activity=>cysk_emeni ame: full=cysteine synthase short=csase ame: full=o-acetylserine -lyase short=oas-tl ame: full=o-acetylserine sulfhydrylase;GO:0005576=>extracellular region=>cysk_…	PF00291=>Pyridoxal-phosphate dependent enzyme;	IPR001926 (Pyridoxal phosphate-dependent enzyme, beta subunit)
RirG013410	665	665_1		PF07534=>TLD;	IPR006571 (TLDc)
RirG013420	6	6_1		PF00651=>BTB/POZ domain;PF07534=>TLD;	IPR006571 (TLDc; IPR011333 (BTB/POZ fold; IPR013089 (Kelch-related)
RirG013430	6929	6929_1
RirG013440	1	1_106		PF00075=>RNase H;	IPR012337 (Ribonuclease H-like)
RirG013450	1	1_2			IPR015706 (RNA-directed DNA polymerase (reverse transcriptase))
RirG013460	12731	12731_1
RirG013470	9069	9069_1
RirG013480	1211	1211_1	GO:0000184=>nuclear-transcribed mRNA catabolic process, nonsense-mediated decay=>rl36_trihm ame: full=60s ribosomal protein l36 ame: full=trp36;GO:0003735=>structural constituent of ribosome=>rl36_trihm ame: full=60s ribosomal protein l36 ame: full=trp36;GO:0005730=>nucleolus=>rl36_trihm ame: full=60s ribosomal protein l36 ame: full=trp36;GO:0005774=>vacuolar membrane=>rl36_trihm ame: full=60s ri…	PF01158=>Ribosomal protein L36e;	IPR000509 (Ribosomal protein L36e)
RirG013490	4110	4110_1	GO:0005488=>binding=>ash2_schpo ame: full=set1 complex component ash2 short=set1c component ash2 ame: full=compass component ash2 ame: full=complex proteins associated with set1 protein ash2 ame: full=lid2 complex component ash2 short=lid2c component ash2;GO:0006351=>transcription, DNA-dependent=>ash2_schpo ame: full=set1 complex component ash2 short=set1c component ash2 ame: full=compass compone…	PF00622=>SPRY domain;	IPR001870 (B302/SPRY domain; IPR008985 (Concanavalin A-like lectin/glucanase; IPR013083 (Zinc finger, RING/FYVE/PHD-type)
RirG013500	3649	3649_1	GO:0000785=>chromatin=>bpl1_schpo ame: full=biotin--protein ligase ame: full=biotin apo-protein ligase includes: ame: full=biotin-- ligase;GO:0004080=>biotin-[propionyl-CoA-carboxylase (ATP-hydrolyzing)] ligase activity=>bpl1_schpo ame: full=biotin--protein ligase ame: full=biotin apo-protein ligase includes: ame: full=biotin-- ligase;GO:0005652=>nuclear lamina=>bpl1_schpo ame: full=biotin--prote…	PF03099=>Biotin/lipoate A/B protein ligase family;PF09825=>Biotin-protein ligase;N terminal;	IPR004408 (Biotin--acetyl-CoA-carboxylase ligase; IPR019197 (Biotin-protein ligase, N-terminal)
RirG013510	970	970_1	GO:0004518=>nuclease activity=>y1251_pyrab ame: full= family protein pyrab12510;GO:0005730=>nucleolus=>y1251_pyrab ame: full= family protein pyrab12510;GO:0005737=>cytoplasm=>y1251_pyrab ame: full= family protein pyrab12510;GO:0006449=>regulation of translational termination=>y1251_pyrab ame: full= family protein pyrab12510;GO:0006566=>threonine metabolic process=>y1251_pyrab ame: full= family pr…	PF01042=>Endoribonuclease L-PSP;	IPR013813 (Endoribonuclease L-PSP/chorismate mutase-like)
RirG013520	5435	5435_1	GO:0006950=>response to stress=>fabg_thema ame: full=3-oxoacyl- reductase ame: full=3-ketoacyl-acyl carrier protein reductase ame: full=beta-ketoacyl-acyl carrier protein reductase ame: full=beta-ketoacyl-acp reductase;GO:0009688=>abscisic acid biosynthetic process=>fabg_thema ame: full=3-oxoacyl- reductase ame: full=3-ketoacyl-acyl carrier protein reductase ame: full=beta-ketoacyl-acyl carrier p…	PF00106=>short chain dehydrogenase;	IPR002198 (Short-chain dehydrogenase/reductase SDR)
RirG013530	7647	7647_1	GO:0000209=>protein polyubiquitination=>rnf13_rat ame: full=e3 ubiquitin-protein ligase rnf13 ame: full=ring finger protein 13 flags: precursor;GO:0004842=>ubiquitin-protein ligase activity=>rnf13_rat ame: full=e3 ubiquitin-protein ligase rnf13 ame: full=ring finger protein 13 flags: precursor;GO:0005515=>protein binding=>rnf13_rat ame: full=e3 ubiquitin-protein ligase rnf13 ame: full=ring finger…	PF00097=>Zinc finger;C3HC4 type (RING finger);	IPR013083 (Zinc finger, RING/FYVE/PHD-type)
RirG013540	2804	2804_1	GO:0000003=>reproduction=>tim17_schpo ame: full=mitochondrial import inner membrane translocase subunit tim17 ame: full=mitochondrial protein import protein 2;GO:0005744=>mitochondrial inner membrane presequence translocase complex=>tim17_schpo ame: full=mitochondrial import inner membrane translocase subunit tim17 ame: full=mitochondrial protein import protein 2;GO:0006626=>protein targeting to …	PF02466=>Tim17/Tim22/Tim23/Pmp24 family;	IPR003397 (Mitochondrial inner membrane translocase complex, subunit Tim17/22)
RirG013550	1648	1648_1	GO:0000077=>DNA damage checkpoint=>hal4_schpo ame: full=serine threonine-protein kinase hal4 ame: full=halotolerance protein 4 ame: full=serine threonine-protein kinase ppk10;GO:0000724=>double-strand break repair via homologous recombination=>hal4_schpo ame: full=serine threonine-protein kinase hal4 ame: full=halotolerance protein 4 ame: full=serine threonine-protein kinase ppk10;GO:0004674=>pro…	PF00069=>Protein kinase domain;	IPR020636 (Calcium/calmodulin-dependent protein kinase-like)
RirG013560	9069	9069_1
RirG013570	7835	7835_1			IPR014720 (Double-stranded RNA-binding-like)
RirG013580	1122	1122_1	GO:0004489=>methylenetetrahydrofolate reductase (NADPH) activity=>mthr1_schpo ame: full=methylenetetrahydrofolate reductase 1;GO:0005829=>cytosol=>mthr1_schpo ame: full=methylenetetrahydrofolate reductase 1;GO:0006555=>methionine metabolic process=>mthr1_schpo ame: full=methylenetetrahydrofolate reductase 1;GO:0008015=>blood circulation=>mthr1_schpo ame: full=methylenetetrahydrofolate reductase 1…	PF02219=>Methylenetetrahydrofolate reductase;	IPR003171 (Methylenetetrahydrofolate reductase)
RirG013590	7673	7673_1		PF04032=>RNAse P Rpr2/Rpp21/SNM1 subunit domain;	IPR007175 (RNAse P, Rpr2/Rpp21 subunit)
RirG013600	4166	4166_1	GO:0006505=>GPI anchor metabolic process=>per1_schpo ame: full=protein per1 homolog flags: precursor;GO:0016788=>hydrolase activity, acting on ester bonds=>per1_schpo ame: full=protein per1 homolog flags: precursor;GO:0031227=>intrinsic to endoplasmic reticulum membrane=>per1_schpo ame: full=protein per1 homolog flags: precursor);	PF04080=>Per1-like ;	IPR007217 (Per1-like)
RirG013610	641	641_1	GO:0003723=>RNA binding=>eif3g_ustma ame: full=eukaryotic translation initiation factor 3 subunit g short=eif3g ame: full=eukaryotic translation initiation factor 3 rna-binding subunit short=eif-3 rna-binding subunit ame: full=translation initiation factor eif3 p33 subunit homolog short=eif3 p33 homolog;GO:0006412=>translation=>eif3g_ustma ame: full=eukaryotic translation initiation factor 3 subu…	PF00076=>RNA recognition motif. (a.k.a. RRM;RBD, or RNP domain);PF12353=>Eukaryotic translation initiation factor 3 subunit G ;	IPR017334 (Translation initiation factor 3, RNA-binding subunit)
RirG013620	774	774_1	GO:0000245=>spliceosomal complex assembly=>dsk1_schpo ame: full=protein kinase dsk1 ame: full=dis1-suppressing protein kinase;GO:0000287=>magnesium ion binding=>dsk1_schpo ame: full=protein kinase dsk1 ame: full=dis1-suppressing protein kinase;GO:0001525=>angiogenesis=>dsk1_schpo ame: full=protein kinase dsk1 ame: full=dis1-suppressing protein kinase;GO:0004674=>protein serine/threonine kinase ac…	PF00069=>Protein kinase domain;	IPR011009 (Protein kinase-like domain)
RirG013630	17305	17305_1		PF00652=>Ricin-type beta-trefoil lectin domain;	IPR000772 (Ricin B lectin)
RirG013640	9	9_1
RirG013650	9	9_4
RirG013660
RirG013670	11	11_1	GO:0004672=>protein kinase activity=>pats1_dicdi ame: full=probable serine threonine-protein kinase pats1 ame: full=protein associated with the transduction of signal 1;GO:0005488=>binding=>pats1_dicdi ame: full=probable serine threonine-protein kinase pats1 ame: full=protein associated with the transduction of signal 1;GO:0009987=>cellular process=>pats1_dicdi ame: full=probable serine threonine…	PF07714=>Protein tyrosine kinase;	IPR011009 (Protein kinase-like domain)
RirG013680	61	61_8
RirG013690	14767	14767_1
RirG013700				PF00069=>Protein kinase domain;	IPR020636 (Calcium/calmodulin-dependent protein kinase-like)
RirG013710	42	42_2			IPR015786 (Mitogen activated protein kinase kinase kinase-related)
RirG013720	18	18_2	GO:0000902=>cell morphogenesis=>klh10_rat ame: full=kelch-like protein 10;GO:0005737=>cytoplasm=>klh10_rat ame: full=kelch-like protein 10;GO:0007286=>spermatid development=>klh10_rat ame: full=kelch-like protein 10;GO:0008584=>male gonad development=>klh10_rat ame: full=kelch-like protein 10;GO:0009566=>fertilization=>klh10_rat ame: full=kelch-like protein 10;GO:0048808=>male genitalia morphogen…	PF00651=>BTB/POZ domain;PF07534=>TLD;	IPR011333 (BTB/POZ fold; IPR013089 (Kelch-related)
RirG013730	2523	2523_1
RirG013740	1024	1024_1
RirG013750	7842	7842_1
RirG013760
RirG013770	15041	15041_1
RirG013780	981	981_1	GO:0005488=>binding=>h17b6_rat ame: full=17-beta-hydroxysteroid dehydrogenase type 6 short=17-beta-hsd 6 short=17-beta-hsd6 ame: full=3-alpha-;GO:0005634=>nucleus=>h17b6_rat ame: full=17-beta-hydroxysteroid dehydrogenase type 6 short=17-beta-hsd 6 short=17-beta-hsd6 ame: full=3-alpha-;GO:0005739=>mitochondrion=>h17b6_rat ame: full=17-beta-hydroxysteroid dehydrogenase type 6 short=17-beta-hsd 6 sh…	PF00106=>short chain dehydrogenase;	IPR002198 (Short-chain dehydrogenase/reductase SDR)
RirG013790	6038	6038_1	GO:0004438=>phosphatidylinositol-3-phosphatase activity=>sac2_danre ame: full=phosphatidylinositide phosphatase sac2 ame: full=inositol polyphosphate 5-phosphatase f ame: full=sac domain-containing inositol phosphatase 2 ame: full=sac domain-containing phosphoinositide 5-phosphatase 2;GO:0005488=>binding=>sac2_danre ame: full=phosphatidylinositide phosphatase sac2 ame: full=inositol polyphosphate…	PF02383=>SacI homology domain;PF12456=>Inositol phosphatase ;	IPR002013 (Synaptojanin, N-terminal; IPR022158 (Inositol phosphatase)
RirG013800	4135	4135_1	GO:0000775=>chromosome, centromeric region=>rad21_bovin ame: full=double-strand-break repair protein rad21 homolog;GO:0000794=>condensed nuclear chromosome=>rad21_bovin ame: full=double-strand-break repair protein rad21 homolog;GO:0006259=>DNA metabolic process=>rad21_bovin ame: full=double-strand-break repair protein rad21 homolog;GO:0006974=>response to DNA damage stimulus=>rad21_bovin ame: ful…	PF04824=>Conserved region of Rad21 / Rec8 like protein;PF04825=>N terminus of Rad21 / Rec8 like protein;	IPR006910 (Rad21/Rec8-like protein, N-terminal; IPR023093 (Rad21/Rec8-like protein, C-terminal)
RirG013810	5236	5236_1
RirG013820	214	214_1
RirG013830	38	38_6
RirG013840	4792	4792_1	GO:0005088=>Ras guanyl-nucleotide exchange factor activity=>gefp_dicdi ame: full=ras guanine nucleotide exchange factor p ame: full= domain-containing protein p;GO:0005515=>protein binding=>gefp_dicdi ame: full=ras guanine nucleotide exchange factor p ame: full= domain-containing protein p;GO:0016020=>membrane=>gefp_dicdi ame: full=ras guanine nucleotide exchange factor p ame: full= domain-contai…	PF00617=>RasGEF domain;PF00618=>RasGEF N-terminal motif;PF08477=>Miro-like protein;	IPR003577 (Ras small GTPase, Ras type; IPR008937 (Ras guanine nucleotide exchange factor; IPR013684 (Mitochondrial Rho-like)
RirG013850	522	522_1	GO:0005773=>vacuole=>gstfa_arath ame: full=glutathione s-transferase f10 short= 10 ame: full= 4 ame: full=gst class-phi member 10 ame: full=protein early response to dehydration 13;GO:0006952=>defense response=>gstfa_arath ame: full=glutathione s-transferase f10 short= 10 ame: full= 4 ame: full=gst class-phi member 10 ame: full=protein early response to dehydration 13;GO:0009507=>chloroplast=>gst…	PF00043=>Glutathione S-transferase;C-terminal domain;PF02798=>Glutathione S-transferase;N-terminal domain;	IPR010987 (Glutathione S-transferase, C-terminal-like; IPR012336 (Thioredoxin-like fold)
RirG013860	522	522_1	GO:0005773=>vacuole=>gstfa_arath ame: full=glutathione s-transferase f10 short= 10 ame: full= 4 ame: full=gst class-phi member 10 ame: full=protein early response to dehydration 13;GO:0006952=>defense response=>gstfa_arath ame: full=glutathione s-transferase f10 short= 10 ame: full= 4 ame: full=gst class-phi member 10 ame: full=protein early response to dehydration 13;GO:0009507=>chloroplast=>gst…	PF00043=>Glutathione S-transferase;C-terminal domain;PF02798=>Glutathione S-transferase;N-terminal domain;	IPR010987 (Glutathione S-transferase, C-terminal-like; IPR012336 (Thioredoxin-like fold)
RirG013870	16	16_28		PF03101=>FAR1 DNA-binding domain;	IPR004330 (Transcription factor, FAR1-related)
RirG013880	16	16_1	GO:0003700=>sequence-specific DNA binding transcription factor activity=>fhy3_arath ame: full=protein far-red elongated hypocotyl 3;GO:0005634=>nucleus=>fhy3_arath ame: full=protein far-red elongated hypocotyl 3;GO:0005975=>carbohydrate metabolic process=>fhy3_arath ame: full=protein far-red elongated hypocotyl 3;GO:0009585=>red, far-red light phototransduction=>fhy3_arath ame: full=protein far-r…	PF10551=>MULE transposase domain;	IPR018289 (MULE transposase, conserved domain)
RirG013890	32	32_2
RirG013900	5934	5934_1		PF02765=>Telomeric single stranded DNA binding POT1/CDC13;	IPR016027 (Nucleic acid-binding, OB-fold-like)
RirG013910	7662	7662_1	GO:0000987=>core promoter proximal region sequence-specific DNA binding=>uhrf1_mouse ame: full=e3 ubiquitin-protein ligase uhrf1 ame: full=nuclear protein 95 ame: full=nuclear zinc finger protein np95 ame: full=ubiquitin-like phd and ring finger domain-containing protein 1 short=muhrf1 ame: full=ubiquitin-like-containing phd and ring finger domains protein 1;GO:0003682=>chromatin binding=>uhrf1_m…	PF02182=>YDG/SRA domain;	IPR003105 (SRA-YDG)
RirG013920	3215	3215_1
RirG013930	3215	3215_1
RirG013940	11150	11150_1
RirG013950	9	9_9
RirG013960	42	42_4	GO:0001816=>cytokine production=>phg2_dicdi ame: full=serine threonine-protein kinase phg2;GO:0002376=>immune system process=>phg2_dicdi ame: full=serine threonine-protein kinase phg2;GO:0004672=>protein kinase activity=>phg2_dicdi ame: full=serine threonine-protein kinase phg2;GO:0005515=>protein binding=>phg2_dicdi ame: full=serine threonine-protein kinase phg2;GO:0005737=>cytoplasm=>phg2_dicdi…	PF00069=>Protein kinase domain;	IPR011009 (Protein kinase-like domain)
RirG013970	2374	2374_1	GO:0005783=>endoplasmic reticulum=>y5025_dicdi ame: full= protein disulfide-isomerase ddb_g0275025 flags: precursor;GO:0007275=>multicellular organismal development=>y5025_dicdi ame: full= protein disulfide-isomerase ddb_g0275025 flags: precursor;GO:0016020=>membrane=>y5025_dicdi ame: full= protein disulfide-isomerase ddb_g0275025 flags: precursor;GO:0022414=>reproductive process=>y5025_dicdi ame…	PF00085=>Thioredoxin;	IPR005746 (Thioredoxin; IPR012336 (Thioredoxin-like fold)
RirG013980			GO:0001666=>response to hypoxia=>rgpa1_human ame: full=ral gtpase-activating protein subunit alpha-1 ame: full=gap-related-interacting partner to e12 short=gripe ame: full=gtpase-activating rap ran-gap domain-like 1 ame: full=tuberin-like protein 1 ame: full=p240;GO:0001843=>neural tube closure=>rgpa1_human ame: full=ral gtpase-activating protein subunit alpha-1 ame: full=gap-related-interacting …	PF02145=>Rap/ran-GAP;	IPR000331 (Rap/ran-GAP)
RirG013990	2124	2124_1		PF02517=>CAAX protease self-immunity;	IPR003675 (Abortive infection protein)
RirG014000
RirG014010	5086	5086_1	GO:0004518=>nuclease activity=>int11_chick ame: full=integrator complex subunit 11 short=int11 ame: full=cleavage and polyadenylation-specific factor 3-like protein short=cpsf3-like protein;GO:0005515=>protein binding=>int11_chick ame: full=integrator complex subunit 11 short=int11 ame: full=cleavage and polyadenylation-specific factor 3-like protein short=cpsf3-like protein;GO:0005847=>mRNA clea…	PF00753=>Metallo-beta-lactamase superfamily;PF07521=>RNA-metabolising metallo-beta-lactamase;PF10996=>Beta-Casp domain;	IPR001279 (Beta-lactamase-like; IPR011108 (RNA-metabolising metallo-beta-lactamase; IPR022712 (Beta-Casp domain)
RirG014020	5751	5751_1	GO:0000981=>sequence-specific DNA binding RNA polymerase II transcription factor activity=>cbf11_schpo ame: full=transcription factor cbf11 ame: full=c-promoter element-binding factor-like protein 11;GO:0001568=>blood vessel development=>cbf11_schpo ame: full=transcription factor cbf11 ame: full=c-promoter element-binding factor-like protein 11;GO:0002376=>immune system process=>cbf11_schpo ame: …	PF09270=>Beta-trefoil DNA-binding domain;PF09271=>LAG1;DNA binding;	IPR008967 (p53-like transcription factor, DNA-binding; IPR015350 (Beta-trefoil)
RirG014030	4710	4710_1	GO:0005737=>cytoplasm=>pof7_schpo ame: full=f-box protein pof7;GO:0006950=>response to stress=>pof7_schpo ame: full=f-box protein pof7;GO:0009266=>response to temperature stimulus=>pof7_schpo ame: full=f-box protein pof7;GO:0043231=>intracellular membrane-bounded organelle=>pof7_schpo ame: full=f-box protein pof7;GO:0044267=>cellular protein metabolic process=>pof7_schpo ame: full=f-box protein p…		IPR022364 (F-box domain, Skp2-like)
RirG014040	11209	11209_1
RirG014050	12732	12732_1	GO:0005488=>binding=>osh3_yeast ame: full=oxysterol-binding protein homolog 3);		IPR000648 (Oxysterol-binding protein; IPR009038 (GOLD; IPR011993 (Pleckstrin homology-type)
RirG014060	4354	4354_1
RirG014070	315	315_2			IPR011335 (Restriction endonuclease, type II-like; IPR012296 (Nuclease, putative, TT1808)
RirG014080	3079	3079_1	GO:0005515=>protein binding=>mon1a_chick ame: full=vacuolar fusion protein mon1 homolog a;GO:0006810=>transport=>mon1a_chick ame: full=vacuolar fusion protein mon1 homolog a;GO:0009987=>cellular process=>mon1a_chick ame: full=vacuolar fusion protein mon1 homolog a;GO:0016020=>membrane=>mon1a_chick ame: full=vacuolar fusion protein mon1 homolog a;GO:0043231=>intracellular membrane-bounded organell…	PF03164=>Trafficking protein Mon1;	IPR004353 (Vacuolar fusion protein MON1)
RirG014090	1715	1715_1		PF00566=>Rab-GTPase-TBC domain;	IPR000195 (Rab-GAP/TBC domain)
RirG014100	2656	2656_1	GO:0005484=>SNAP receptor activity=>ykt6_schpo ame: full=synaptobrevin homolog ykt6 flags: precursor;GO:0005634=>nucleus=>ykt6_schpo ame: full=synaptobrevin homolog ykt6 flags: precursor;GO:0005739=>mitochondrion=>ykt6_schpo ame: full=synaptobrevin homolog ykt6 flags: precursor;GO:0005768=>endosome=>ykt6_schpo ame: full=synaptobrevin homolog ykt6 flags: precursor;GO:0005783=>endoplasmic reticulum…	PF00957=>Synaptobrevin;	IPR001388 (Synaptobrevin; IPR011012 (Longin-like)
RirG014110	4218	4218_1	GO:0005488=>binding=>exo84_crynb ame: full=exocyst complex component exo84;GO:0009987=>cellular process=>exo84_crynb ame: full=exocyst complex component exo84;GO:0030427=>site of polarized growth=>exo84_crynb ame: full=exocyst complex component exo84;GO:0044444=>cytoplasmic part=>exo84_crynb ame: full=exocyst complex component exo84;GO:0051179=>localization=>exo84_crynb ame: full=exocyst complex …	PF08700=>Vps51/Vps67;	IPR011993 (Pleckstrin homology-type; IPR014812 (Vps51/Vps67; IPR016159 (Cullin repeat-like-containing domain)
RirG014120	1535	1535_1	GO:0000003=>reproduction=>psa5_schpo ame: full=probable proteasome subunit alpha type-5;GO:0000084=>S phase of mitotic cell cycle=>psa5_schpo ame: full=probable proteasome subunit alpha type-5;GO:0000085=>G2 phase of mitotic cell cycle=>psa5_schpo ame: full=probable proteasome subunit alpha type-5;GO:0000209=>protein polyubiquitination=>psa5_schpo ame: full=probable proteasome subunit alpha type-…	PF00227=>Proteasome subunit;PF10584=>Proteasome subunit A N-terminal signature;	IPR000426 (Proteasome, alpha-subunit, conserved site; IPR001353 (Proteasome, subunit alpha/beta)
RirG014130	54	54_1
RirG014140
RirG014150			GO:0001540=>beta-amyloid binding=>ide_rat ame: full=insulin-degrading enzyme ame: full=insulin protease short=insulinase ame: full=insulysin;GO:0001948=>glycoprotein binding=>ide_rat ame: full=insulin-degrading enzyme ame: full=insulin protease short=insulinase ame: full=insulysin;GO:0004222=>metalloendopeptidase activity=>ide_rat ame: full=insulin-degrading enzyme ame: full=insulin protease shor…	PF00675=>Insulinase (Peptidase family M16);PF05193=>Peptidase M16 inactive domain;	IPR011249 (Metalloenzyme, LuxS/M16 peptidase-like, metal-binding)
RirG014160	14995	14995_1
RirG014170	223	223_1	GO:0005216=>ion channel activity=>yajo_ecoli ame: full=uncharacterized oxidoreductase;GO:0005737=>cytoplasm=>yajo_ecoli ame: full=uncharacterized oxidoreductase;GO:0006811=>ion transport=>yajo_ecoli ame: full=uncharacterized oxidoreductase;GO:0016020=>membrane=>yajo_ecoli ame: full=uncharacterized oxidoreductase;GO:0044237=>cellular metabolic process=>yajo_ecoli ame: full=uncharacterized oxidored…	PF00248=>Aldo/keto reductase family;	IPR001395 (Aldo/keto reductase; IPR023210 (NADP-dependent oxidoreductase domain)
RirG014180	315	315_1
RirG014190	113	113_2
RirG014200
RirG014210
RirG014220	17308	17308_1		PF00403=>Heavy-metal-associated domain;	IPR006121 (Heavy metal transport/detoxification protein)
RirG014230	4283	4283_1	GO:0003951=>NAD+ kinase activity=>pos5_schpo ame: full=nadh kinase mitochondrial flags: precursor;GO:0005516=>calmodulin binding=>pos5_schpo ame: full=nadh kinase mitochondrial flags: precursor;GO:0009117=>nucleotide metabolic process=>pos5_schpo ame: full=nadh kinase mitochondrial flags: precursor;GO:0009507=>chloroplast=>pos5_schpo ame: full=nadh kinase mitochondrial flags: precursor);	PF01513=>ATP-NAD kinase;	IPR002504 (Inorganic polyphosphate/ATP-NAD kinase, predicted)
RirG014240	2270	2270_1	GO:0005730=>nucleolus=>yiy9_schpo ame: full=uncharacterized protein);	PF07767=>Nop53 (60S ribosomal biogenesis);	IPR011687 (P60-like)
RirG014250	1124	1124_1		PF07690=>Major Facilitator Superfamily;	IPR011701 (Major facilitator superfamily MFS-1; IPR016196 (Major facilitator superfamily, general substrate transporter)
RirG014260	1026	1026_1	GO:0000956=>nuclear-transcribed mRNA catabolic process=>znfx1_mouse ame: full=nfx1-type zinc finger-containing protein 1;GO:0005488=>binding=>znfx1_mouse ame: full=nfx1-type zinc finger-containing protein 1;GO:0010468=>regulation of gene expression=>znfx1_mouse ame: full=nfx1-type zinc finger-containing protein 1;GO:0016787=>hydrolase activity=>znfx1_mouse ame: full=nfx1-type zinc finger-containi…	PF04851=>Type III restriction enzyme;res subunit;	IPR000967 (Zinc finger, NF-X1-type; IPR006935 (Restriction endonuclease, type I, R subunit/Type III, Res subunit)
RirG014270	510	510_1	GO:0004618=>phosphoglycerate kinase activity=>pgk_aspor ame: full=phosphoglycerate kinase;GO:0005515=>protein binding=>pgk_aspor ame: full=phosphoglycerate kinase;GO:0005524=>ATP binding=>pgk_aspor ame: full=phosphoglycerate kinase;GO:0005576=>extracellular region=>pgk_aspor ame: full=phosphoglycerate kinase;GO:0005694=>chromosome=>pgk_aspor ame: full=phosphoglycerate kinase;GO:0005829=>cytosol=>…	PF00162=>Phosphoglycerate kinase;	IPR001576 (Phosphoglycerate kinase)
RirG014280	15047	15047_1
RirG014290	6043	6043_1	GO:0005739=>mitochondrion=>coxm1_schpo ame: full=cox assembly mitochondrial protein 1 ame: full=cx9c motif-containing protein 1);	PF08583=>Cytochrome c oxidase biogenesis protein Cmc1 like;	IPR013892 (Cytochrome c oxidase biogenesis protein Cmc1-like)
RirG014300	2018	2018_1	GO:0001505=>regulation of neurotransmitter levels=>cacp_cantr ame: full=carnitine o- mitochondrial short=carnitine acetylase flags: precursor;GO:0004092=>carnitine O-acetyltransferase activity=>cacp_cantr ame: full=carnitine o- mitochondrial short=carnitine acetylase flags: precursor;GO:0005102=>receptor binding=>cacp_cantr ame: full=carnitine o- mitochondrial short=carnitine acetylase flags: pre…	PF00755=>Choline/Carnitine o-acyltransferase;	IPR000542 (Acyltransferase ChoActase/COT/CPT)
RirG014310	3175	3175_1	GO:0002020=>protease binding=>lon2_myxxa ame: full=lon protease 2 ame: full=atp-dependent protease la 2;GO:0005102=>receptor binding=>lon2_myxxa ame: full=lon protease 2 ame: full=atp-dependent protease la 2;GO:0005634=>nucleus=>lon2_myxxa ame: full=lon protease 2 ame: full=atp-dependent protease la 2;GO:0005777=>peroxisome=>lon2_myxxa ame: full=lon protease 2 ame: full=atp-dependent protease la …	PF00004=>ATPase family associated with various cellular activities (AAA);PF02190=>ATP-dependent protease La (LON) domain;PF05362=>Lon protease (S16) C-terminal proteolytic domain;	IPR004815 (Peptidase S16, ATP-dependent protease La; IPR015947 (Pseudouridine synthase/archaeosine transglycosylase-like)
RirG014320	9886	9886_1		PF02515=>CoA-transferase family III;	IPR003673 (CoA-transferase family III)
RirG014330	1454	1454_1		PF02714=>Domain of unknown function DUF221;	IPR003864 (Domain of unknown function DUF221)
RirG014340	1030	1030_1		PF07690=>Major Facilitator Superfamily;	IPR011701 (Major facilitator superfamily MFS-1; IPR016196 (Major facilitator superfamily, general substrate transporter)
RirG014350	7421	7421_1
RirG014360
RirG014370	125	125_1
RirG014380	11229	11229_1
RirG014390	35	35_1
RirG014400	42	42_4	GO:0001816=>cytokine production=>y9844_dicdi ame: full=probable serine threonine-protein kinase ddb_g0282963;GO:0002376=>immune system process=>y9844_dicdi ame: full=probable serine threonine-protein kinase ddb_g0282963;GO:0005488=>binding=>y9844_dicdi ame: full=probable serine threonine-protein kinase ddb_g0282963;GO:0007165=>signal transduction=>y9844_dicdi ame: full=probable serine threonine-p…	PF07714=>Protein tyrosine kinase;	IPR011009 (Protein kinase-like domain)
RirG014410	42	42_4	GO:0000165=>MAPK cascade=>yr831_mimiv ame: full= serine threonine-protein kinase receptor r831 flags: precursor;GO:0004674=>protein serine/threonine kinase activity=>yr831_mimiv ame: full= serine threonine-protein kinase receptor r831 flags: precursor;GO:0005515=>protein binding=>yr831_mimiv ame: full= serine threonine-protein kinase receptor r831 flags: precursor;GO:0006468=>protein phosphorylat…	PF00069=>Protein kinase domain;	IPR011009 (Protein kinase-like domain)
RirG014420	6	6_1		PF00651=>BTB/POZ domain;PF07534=>TLD;PF07707=>BTB And C-terminal Kelch;	IPR011333 (BTB/POZ fold; IPR013089 (Kelch-related)
RirG014430	90	90_1
RirG014440				PF08238=>Sel1 repeat;	IPR011990 (Tetratricopeptide-like helical)
RirG014450
RirG014460
RirG014470
RirG014480	7417	7417_1
RirG014490	1267	1267_1			IPR002078 (RNA polymerase sigma factor 54, interaction)
RirG014500	1551	1551_1	GO:0000003=>reproduction=>rrb1_schpo ame: full=ribosome assembly protein rrb1;GO:0000118=>histone deacetylase complex=>rrb1_schpo ame: full=ribosome assembly protein rrb1;GO:0000278=>mitotic cell cycle=>rrb1_schpo ame: full=ribosome assembly protein rrb1;GO:0005515=>protein binding=>rrb1_schpo ame: full=ribosome assembly protein rrb1;GO:0005678=>chromatin assembly complex=>rrb1_schpo ame: full=ri…	PF00400=>WD domain;G-beta repeat;PF12265=>Histone-binding protein RBBP4 or subunit C of CAF1 complex;	IPR015943 (WD40/YVTN repeat-like-containing domain; IPR020472 (G-protein beta WD-40 repeat; IPR022052 (Histone-binding protein RBBP4)
RirG014510	768	768_1	GO:0003743=>translation initiation factor activity=>eif3f_phano ame: full=eukaryotic translation initiation factor 3 subunit f short=eif3f;GO:0005515=>protein binding=>eif3f_phano ame: full=eukaryotic translation initiation factor 3 subunit f short=eif3f;GO:0005829=>cytosol=>eif3f_phano ame: full=eukaryotic translation initiation factor 3 subunit f short=eif3f;GO:0005852=>eukaryotic translation i…	PF01398=>JAB1/Mov34/MPN/PAD-1 ubiquitin protease;	IPR000555 (Mov34/MPN/PAD-1)
RirG014520	1024	1024_1
RirG014530	5557	5557_1		PF00023=>Ankyrin repeat;	IPR020683 (Ankyrin repeat-containing domain)
RirG014540			GO:0005200=>structural constituent of cytoskeleton=>anr65_human ame: full=ankyrin repeat domain-containing protein 65;GO:0005730=>nucleolus=>anr65_human ame: full=ankyrin repeat domain-containing protein 65;GO:0005829=>cytosol=>anr65_human ame: full=ankyrin repeat domain-containing protein 65;GO:0005911=>cell-cell junction=>anr65_human ame: full=ankyrin repeat domain-containing protein 65;GO:0006…	PF00023=>Ankyrin repeat;	IPR020683 (Ankyrin repeat-containing domain)
RirG014550
RirG014560	10174	10174_1
RirG014570	884	884_1
RirG014580	9	9_1
RirG014590	6134	6134_1	GO:0005739=>mitochondrion=>yd286_mouse ame: full=glutaredoxin-like protein c5orf63 homolog);	PF05768=>Glutaredoxin-like domain (DUF836);	IPR008554 (Glutaredoxin-like; IPR012336 (Thioredoxin-like fold)
RirG014600
RirG014610	755	755_1	GO:0000072=>M phase specific microtubule process=>ppx4_parte ame: full=serine threonine-protein phosphatase pp-x homolog 4;GO:0001525=>angiogenesis=>ppx4_parte ame: full=serine threonine-protein phosphatase pp-x homolog 4;GO:0002119=>nematode larval development=>ppx4_parte ame: full=serine threonine-protein phosphatase pp-x homolog 4;GO:0004704=>NF-kappaB-inducing kinase activity=>ppx4_parte ame:…	PF00149=>Calcineurin-like phosphoesterase;	IPR004843 (Metallo-dependent phosphatase)
RirG014620	3659	3659_1	GO:0005634=>nucleus=>ula1_mouse ame: full=nedd8-activating enzyme e1 regulatory subunit ame: full=amyloid beta precursor protein-binding protein 59 kda short=app-bp1 ame: full=amyloid protein-binding protein 1;GO:0005829=>cytosol=>ula1_mouse ame: full=nedd8-activating enzyme e1 regulatory subunit ame: full=amyloid beta precursor protein-binding protein 59 kda short=app-bp1 ame: full=amyloid prote…	PF00899=>ThiF family;	IPR016040 (NAD(P)-binding domain)
RirG014630	3063	3063_1	GO:0000122=>negative regulation of transcription from RNA polymerase II promoter=>clp1_botfb ame: full=protein clp1;GO:0000214=>tRNA-intron endonuclease complex=>clp1_botfb ame: full=protein clp1;GO:0000398=>mRNA splicing, via spliceosome=>clp1_botfb ame: full=protein clp1;GO:0002221=>pattern recognition receptor signaling pathway=>clp1_botfb ame: full=protein clp1;GO:0004861=>cyclin-dependent pr…	PF03205=>Molybdopterin guanine dinucleotide synthesis protein B;PF06807=>Pre-mRNA cleavage complex II protein Clp1;	IPR010655 (Pre-mRNA cleavage complex II Clp1)
RirG014640
RirG014650	11	11_2	GO:0016301=>kinase activity=>dusty_pimpr ame: full=dual serine threonine and tyrosine protein kinase ame: full=dusty protein kinase short=dusty pk ame: full=receptor-interacting serine threonine-protein kinase 5);	PF07714=>Protein tyrosine kinase;	IPR011009 (Protein kinase-like domain)
RirG014660	11	11_1	GO:0016301=>kinase activity=>y9844_dicdi ame: full=probable serine threonine-protein kinase ddb_g0282963);	PF07714=>Protein tyrosine kinase;	IPR011009 (Protein kinase-like domain)
RirG014670	11	11_1	GO:0001816=>cytokine production=>zak1_dicdi ame: full=dual specificity protein kinase zaka ame: full=zaphod k kinase 1 short=zaphod kinase 1 ame: full=zaphod kinase a;GO:0002376=>immune system process=>zak1_dicdi ame: full=dual specificity protein kinase zaka ame: full=zaphod k kinase 1 short=zaphod kinase 1 ame: full=zaphod kinase a;GO:0004672=>protein kinase activity=>zak1_dicdi ame: full=dual …	PF07714=>Protein tyrosine kinase;	IPR011009 (Protein kinase-like domain)
RirG014680	7397	7397_1
RirG014690	7397	7397_1
RirG014700	11	11_2	GO:0016772=>transferase activity, transferring phosphorus-containing groups=>zak1_dicdi ame: full=dual specificity protein kinase zaka ame: full=zaphod k kinase 1 short=zaphod kinase 1 ame: full=zaphod kinase a);	PF07714=>Protein tyrosine kinase;	IPR011009 (Protein kinase-like domain)
RirG014710	7397	7397_1
RirG014720	6155	6155_1	GO:0000012=>single strand break repair=>tydp1_mouse ame: full=tyrosyl-dna phosphodiesterase 1 short=tyr-dna phosphodiesterase 1 ame: full=protein expressed in male leptotene and zygotene spermatocytes 501 short=mlz-501;GO:0003690=>double-stranded DNA binding=>tydp1_mouse ame: full=tyrosyl-dna phosphodiesterase 1 short=tyr-dna phosphodiesterase 1 ame: full=protein expressed in male leptotene and z…	PF06087=>Tyrosyl-DNA phosphodiesterase;	IPR010347 (Tyrosyl-DNA phosphodiesterase)
RirG014730	291	291_1	GO:0007588=>excretion=>grhpr_mouse ame: full=glyoxylate reductase hydroxypyruvate reductase;GO:0008465=>glycerate dehydrogenase activity=>grhpr_mouse ame: full=glyoxylate reductase hydroxypyruvate reductase;GO:0016618=>hydroxypyruvate reductase activity=>grhpr_mouse ame: full=glyoxylate reductase hydroxypyruvate reductase;GO:0030267=>glyoxylate reductase (NADP) activity=>grhpr_mouse ame: full=gly…	PF00389=>D-isomer specific 2-hydroxyacid dehydrogenase;catalytic domain;PF02826=>D-isomer specific 2-hydroxyacid dehydrogenase;NAD binding domain;	IPR006139 (D-isomer specific 2-hydroxyacid dehydrogenase, catalytic domain)
RirG014740
RirG014750
RirG014760	57	57_3		PF08238=>Sel1 repeat;	IPR011990 (Tetratricopeptide-like helical)
RirG014770	8	8_6	GO:0009987=>cellular process=>ybeq_ecoli ame: full=uncharacterized protein;GO:0050896=>response to stimulus=>ybeq_ecoli ame: full=uncharacterized protein);	PF08238=>Sel1 repeat;	IPR011990 (Tetratricopeptide-like helical)
RirG014780	5522	5522_1		PF08238=>Sel1 repeat;	IPR011990 (Tetratricopeptide-like helical)
RirG014790	14983	14983_1
RirG014800
RirG014810	11199	11199_1	GO:0000165=>MAPK cascade=>y1199_dicdi ame: full=probable serine threonine-protein kinase ddb_g0282895;GO:0002224=>toll-like receptor signaling pathway=>y1199_dicdi ame: full=probable serine threonine-protein kinase ddb_g0282895;GO:0004672=>protein kinase activity=>y1199_dicdi ame: full=probable serine threonine-protein kinase ddb_g0282895;GO:0005488=>binding=>y1199_dicdi ame: full=probable serine…	PF00069=>Protein kinase domain;	IPR011009 (Protein kinase-like domain)
RirG014820	13	13_3	GO:0002224=>toll-like receptor signaling pathway=>y9963_dicdi ame: full=probable serine threonine-protein kinase ddb_g0272254;GO:0004674=>protein serine/threonine kinase activity=>y9963_dicdi ame: full=probable serine threonine-protein kinase ddb_g0272254;GO:0005488=>binding=>y9963_dicdi ame: full=probable serine threonine-protein kinase ddb_g0272254;GO:0007166=>cell surface receptor signaling pa…	PF07714=>Protein tyrosine kinase;	IPR011009 (Protein kinase-like domain)
RirG014830	6581	6581_1			IPR013761 (Sterile alpha motif-type)
RirG014840	6581	6581_1			IPR013761 (Sterile alpha motif-type)
RirG014850	9015	9015_1
RirG014860	9015	9015_1	GO:0005515=>protein binding=>drkd_dicdi ame: full=probable serine threonine-protein kinase drkd ame: full=receptor-like kinase d;GO:0005737=>cytoplasm=>drkd_dicdi ame: full=probable serine threonine-protein kinase drkd ame: full=receptor-like kinase d;GO:0007165=>signal transduction=>drkd_dicdi ame: full=probable serine threonine-protein kinase drkd ame: full=receptor-like kinase d;GO:0010033=>re…	PF07714=>Protein tyrosine kinase;	IPR020685 (Tyrosine-protein kinase)
RirG014870
RirG014880	14893	14893_1		PF00583=>Acetyltransferase (GNAT) family;	IPR016181 (Acyl-CoA N-acyltransferase)
RirG014890	123	123_2
RirG014900	26	26_13
RirG014910	123	123_2	GO:0000114=>regulation of transcription involved in G1 phase of mitotic cell cycle=>bdf1_schpo ame: full=swr1 complex bromodomain subunit bdf1;GO:0000790=>nuclear chromatin=>bdf1_schpo ame: full=swr1 complex bromodomain subunit bdf1;GO:0000794=>condensed nuclear chromosome=>bdf1_schpo ame: full=swr1 complex bromodomain subunit bdf1;GO:0001833=>inner cell mass cell proliferation=>bdf1_schpo ame: f…	PF00439=>Bromodomain;	IPR001487 (Bromodomain)
RirG014920				PF00069=>Protein kinase domain;	IPR000719 (Protein kinase, catalytic domain)
RirG014930	50	50_2		PF00651=>BTB/POZ domain;	IPR011333 (BTB/POZ fold; IPR013089 (Kelch-related)
RirG014940				PF03901=>Alg9-like mannosyltransferase family;	IPR005599 (GPI mannosyltransferase)
RirG014950	371	371_1	GO:0005829=>cytosol=>yaof_schpo ame: full=uncharacterized protein;GO:0006750=>glutathione biosynthetic process=>yaof_schpo ame: full=uncharacterized protein;GO:0006751=>glutathione catabolic process=>yaof_schpo ame: full=uncharacterized protein;GO:0006805=>xenobiotic metabolic process=>yaof_schpo ame: full=uncharacterized protein;GO:0009506=>plasmodesma=>yaof_schpo ame: full=uncharacterized prote…	PF01968=>Hydantoinase/oxoprolinase;PF02538=>Hydantoinase B/oxoprolinase;PF05378=>Hydantoinase/oxoprolinase N-terminal region;	IPR002821 (Hydantoinase/oxoprolinase; IPR003692 (Hydantoinase B/oxoprolinase; IPR008040 (Hydantoinaseoxoprolinase, N-terminal)
RirG014960	598	598_1
RirG014970	601	601_1
RirG014980	601	601_1
RirG014990			GO:0006631=>fatty acid metabolic process=>4cl3_arath ame: full=4-coumarate-- ligase 3 short=4cl 3 ame: full=4-coumarate-- ligase isoform 3 short=at4cl3 ame: full=4-coumaroyl- synthase 3;GO:0006952=>defense response=>4cl3_arath ame: full=4-coumarate-- ligase 3 short=4cl 3 ame: full=4-coumarate-- ligase isoform 3 short=at4cl3 ame: full=4-coumaroyl- synthase 3;GO:0009411=>response to UV=>4cl3_arath …	PF00501=>AMP-binding enzyme;	IPR000873 (AMP-dependent synthetase/ligase)
RirG015000	288	288_1
RirG015010	288	288_1
RirG015020	4610	4610_1		PF08238=>Sel1 repeat;	IPR011990 (Tetratricopeptide-like helical)
RirG015030	29	29_2
RirG015040			GO:0016787=>hydrolase activity=>mca1a_aspor ame: full=metacaspase-1a flags: precursor);
RirG015050
RirG015060	4659	4659_1	GO:0001676=>long-chain fatty acid metabolic process=>sld1_klula ame: full=delta -fatty-acid desaturase ame: full=delta -sphingolipid desaturase;GO:0005488=>binding=>sld1_klula ame: full=delta -fatty-acid desaturase ame: full=delta -sphingolipid desaturase;GO:0006633=>fatty acid biosynthetic process=>sld1_klula ame: full=delta -fatty-acid desaturase ame: full=delta -sphingolipid desaturase;GO:0010…	PF00173=>Cytochrome b5-like Heme/Steroid binding domain;PF00487=>Fatty acid desaturase;	IPR012171 (Fatty acid/sphingolipid desaturase)
RirG015070	2334	2334_1	GO:0000209=>protein polyubiquitination=>ppil2_rhio9 ame: full=peptidyl-prolyl cis-trans isomerase-like 2 short=ppiase ame: full=cyclophilin-60 ame: full=cyclophilin-like protein cyp-60 ame: full=rotamase;GO:0005515=>protein binding=>ppil2_rhio9 ame: full=peptidyl-prolyl cis-trans isomerase-like 2 short=ppiase ame: full=cyclophilin-60 ame: full=cyclophilin-like protein cyp-60 ame: full=rotamase;GO…	PF00160=>Cyclophilin type peptidyl-prolyl cis-trans isomerase/CLD;	IPR015891 (Cyclophilin-like)
RirG015080	1213	1213_1	GO:0000184=>nuclear-transcribed mRNA catabolic process, nonsense-mediated decay=>rl1b_schpo ame: full=60s ribosomal protein l1-b ame: full=l10a;GO:0001510=>RNA methylation=>rl1b_schpo ame: full=60s ribosomal protein l1-b ame: full=l10a;GO:0002119=>nematode larval development=>rl1b_schpo ame: full=60s ribosomal protein l1-b ame: full=l10a;GO:0003735=>structural constituent of ribosome=>rl1b_schpo …	PF00687=>Ribosomal protein L1p/L10e family;	IPR002143 (Ribosomal protein L1)
RirG015090	8818	8818_1
RirG015100
RirG015110	287	287_2
RirG015120	317	317_2			IPR013761 (Sterile alpha motif-type)
RirG015130	41	41_1
RirG015140	41	41_8
RirG015150	17265	17265_1	GO:0005739=>mitochondrion=>tatd3_human ame: full= deoxyribonuclease tatdn3);	PF01026=>TatD related DNase;	IPR001130 (Deoxyribonuclease, TatD-related)
RirG015160
RirG015170	2481	2481_1
RirG015180	2481	2481_1
RirG015190	2481	2481_1
RirG015200	2481	2481_1
RirG015210	7233	7233_1		PF03798=>TLC domain;	IPR006634 (TRAM/LAG1/CLN8 homology domain)
RirG015220
RirG015230					IPR000342 (Regulator of G protein signalling; IPR016084 (Haem oxygenase-like, multi-helical)
RirG015240	9	9_10
RirG015250	292	292_1
RirG015260	1264	1264_1			IPR005135 (Endonuclease/exonuclease/phosphatase)
RirG015270	4941	4941_1
RirG015280
RirG015290	5327	5327_1	GO:0005737=>cytoplasm=>badh_schpo ame: full=probable betaine aldehyde dehydrogenase short=badh ame: full=meiotic expression up-regulated protein 8;GO:0006081=>cellular aldehyde metabolic process=>badh_schpo ame: full=probable betaine aldehyde dehydrogenase short=badh ame: full=meiotic expression up-regulated protein 8;GO:0007154=>cell communication=>badh_schpo ame: full=probable betaine aldehyde …	PF00171=>Aldehyde dehydrogenase family;	IPR016161 (Aldehyde/histidinol dehydrogenase)
RirG015300
RirG015310				PF10384=>Centromere protein Scm3;	IPR018465 (Centromere protein Scm3, N-terminal)
RirG015320	69	69_3	GO:0004497=>monooxygenase activity=>cp19a_mouse ame: full=cytochrome p450 19a1 ame: full=aromatase ame: full=cypxix ame: full=cytochrome p-450arom ame: full=estrogen synthase;GO:0005488=>binding=>cp19a_mouse ame: full=cytochrome p450 19a1 ame: full=aromatase ame: full=cypxix ame: full=cytochrome p-450arom ame: full=estrogen synthase;GO:0006520=>cellular amino acid metabolic process=>cp19a_mouse a…	PF00067=>Cytochrome P450;	IPR001128 (Cytochrome P450)
RirG015330				PF08241=>Methyltransferase domain;	IPR013216 (Methyltransferase type 11)
RirG015340
RirG015350
RirG015360
RirG015370	623	623_1	GO:0000089=>mitotic metaphase=>pesc_schpo ame: full=pescadillo homolog ame: full=nucleolar protein 7 homolog;GO:0000793=>condensed chromosome=>pesc_schpo ame: full=pescadillo homolog ame: full=nucleolar protein 7 homolog;GO:0005515=>protein binding=>pesc_schpo ame: full=pescadillo homolog ame: full=nucleolar protein 7 homolog;GO:0006364=>rRNA processing=>pesc_schpo ame: full=pescadillo homolog am…	PF00533=>BRCA1 C Terminus (BRCT) domain;PF06732=>Pescadillo N-terminus;	IPR001357 (BRCT; IPR010613 (Pescadillo, N-terminal)
RirG015380	3429	3429_1	GO:0004674=>protein serine/threonine kinase activity=>mph1_schpo ame: full=serine threonine-protein kinase mph1;GO:0005488=>binding=>mph1_schpo ame: full=serine threonine-protein kinase mph1;GO:0006915=>apoptotic process=>mph1_schpo ame: full=serine threonine-protein kinase mph1;GO:0007051=>spindle organization=>mph1_schpo ame: full=serine threonine-protein kinase mph1;GO:0007093=>mitotic cell cy…	PF00069=>Protein kinase domain;	IPR011009 (Protein kinase-like domain)
RirG015390	5805	5805_1		PF05057=>Putative serine esterase (DUF676);	IPR007751 (Domain of unknown function DUF676, hydrolase-like)
RirG015400
RirG015410	6878	6878_1		PF05699=>hAT family dimerisation domain;	IPR008906 (HAT dimerisation; IPR012337 (Ribonuclease H-like)
RirG015420	257	257_1
RirG015430
RirG015440
RirG015450	1265	1265_1
RirG015460	525	525_1
RirG015470	9	9_1
RirG015480
RirG015490	7390	7390_1	GO:0004672=>protein kinase activity=>pkn2_corgl ame: full=serine threonine-protein kinases pkna);	PF00069=>Protein kinase domain;	IPR011009 (Protein kinase-like domain)
RirG015500	1698	1698_1	GO:0000375=>RNA splicing, via transesterification reactions=>lsm1_schpo ame: full=u6 snrna-associated sm-like protein lsm1;GO:0003723=>RNA binding=>lsm1_schpo ame: full=u6 snrna-associated sm-like protein lsm1;GO:0005515=>protein binding=>lsm1_schpo ame: full=u6 snrna-associated sm-like protein lsm1;GO:0005634=>nucleus=>lsm1_schpo ame: full=u6 snrna-associated sm-like protein lsm1;GO:0005829=>cyt…	PF01423=>LSM domain ;	IPR010920 (Like-Sm ribonucleoprotein (LSM)-related domain)
RirG015510	1100	1100_1
RirG015520	7390	7390_1	GO:0001772=>immunological synapse=>pkn2_corgl ame: full=serine threonine-protein kinases pkna;GO:0004697=>protein kinase C activity=>pkn2_corgl ame: full=serine threonine-protein kinases pkna;GO:0005515=>protein binding=>pkn2_corgl ame: full=serine threonine-protein kinases pkna;GO:0006468=>protein phosphorylation=>pkn2_corgl ame: full=serine threonine-protein kinases pkna;GO:0006509=>membrane pr…	PF00069=>Protein kinase domain;	IPR011009 (Protein kinase-like domain)
RirG015530			GO:0000910=>cytokinesis=>psy1_schpo ame: full=syntaxin-like protein psy1;GO:0005773=>vacuole=>psy1_schpo ame: full=syntaxin-like protein psy1;GO:0006944=>cellular membrane fusion=>psy1_schpo ame: full=syntaxin-like protein psy1;GO:0007165=>signal transduction=>psy1_schpo ame: full=syntaxin-like protein psy1;GO:0007399=>nervous system development=>psy1_schpo ame: full=syntaxin-like protein psy1;GO…	PF00804=>Syntaxin;	IPR010989 (t-SNARE)
RirG015540			GO:0005096=>GTPase activator activity=>rgpa1_mouse ame: full=ral gtpase-activating protein subunit alpha-1 ame: full=gap-related-interacting partner to e12 short=gripe ame: full=gtpase-activating domain-like 1 ame: full=tuberin-like protein 1 ame: full=p240;GO:0005737=>cytoplasm=>rgpa1_mouse ame: full=ral gtpase-activating protein subunit alpha-1 ame: full=gap-related-interacting partner to e12 s…
RirG015550	9734	9734_1	GO:0001666=>response to hypoxia=>y5521_drome ame: full=probable rho gtpase-activating protein cg5521;GO:0001843=>neural tube closure=>y5521_drome ame: full=probable rho gtpase-activating protein cg5521;GO:0005099=>Ras GTPase activator activity=>y5521_drome ame: full=probable rho gtpase-activating protein cg5521;GO:0005634=>nucleus=>y5521_drome ame: full=probable rho gtpase-activating protein cg55…	PF02145=>Rap/ran-GAP;	IPR000331 (Rap/ran-GAP)
RirG015560	3840	3840_1	GO:0002119=>nematode larval development=>cog2_human ame: full=conserved oligomeric golgi complex subunit 2 short=cog complex subunit 2 ame: full=component of oligomeric golgi complex 2 ame: full=low density lipoprotein receptor defect c-complementing protein;GO:0006810=>transport=>cog2_human ame: full=conserved oligomeric golgi complex subunit 2 short=cog complex subunit 2 ame: full=component of …	PF06148=>COG (conserved oligomeric Golgi) complex component;COG2;PF12022=>Domain of unknown function (DUF3510);	IPR009316 (COG complex component, COG2)
RirG015570	4085	4085_1	GO:0000166=>nucleotide binding=>lys12_schpo ame: full=probable homoisocitrate dehydrogenase;GO:0005739=>mitochondrion=>lys12_schpo ame: full=probable homoisocitrate dehydrogenase;GO:0006732=>coenzyme metabolic process=>lys12_schpo ame: full=probable homoisocitrate dehydrogenase;GO:0008652=>cellular amino acid biosynthetic process=>lys12_schpo ame: full=probable homoisocitrate dehydrogenase;GO:000…	PF00180=>Isocitrate/isopropylmalate dehydrogenase;	IPR001804 (Isocitrate/isopropylmalate dehydrogenase)
RirG015580	11213	11213_1
RirG015590	4700	4700_1
RirG015600	1266	1266_1		PF04433=>SWIRM domain;	IPR007526 (SWIRM; IPR009057 (Homeodomain-like)
RirG015610	3005	3005_1	GO:0000977=>RNA polymerase II regulatory region sequence-specific DNA binding=>ptps_poere ame: full=6-pyruvoyl tetrahydrobiopterin synthase short=ptp synthase short=ptps;GO:0003705=>RNA polymerase II distal enhancer sequence-specific DNA binding transcription factor activity=>ptps_poere ame: full=6-pyruvoyl tetrahydrobiopterin synthase short=ptp synthase short=ptps;GO:0003874=>6-pyruvoyltetrahydr…	PF01242=>6-pyruvoyl tetrahydropterin synthase;	IPR007115 (6-pyruvoyl tetrahydropterin synthase-related)
RirG015620			GO:0005515=>protein binding=>pen2_drome ame: full=gamma-secretase subunit pen-2 ame: full=presenilin enhancer protein 2;GO:0005783=>endoplasmic reticulum=>pen2_drome ame: full=gamma-secretase subunit pen-2 ame: full=presenilin enhancer protein 2;GO:0005794=>Golgi apparatus=>pen2_drome ame: full=gamma-secretase subunit pen-2 ame: full=presenilin enhancer protein 2;GO:0005887=>integral to plasma me…	PF10251=>Presenilin enhancer-2 subunit of gamma secretase;	IPR019379 (Gamma-secretase aspartyl protease complex, presenilin enhancer-2 subunit)
RirG015630	2713	2713_1	GO:0005488=>binding=>swc4_schpo ame: full=swr1-complex protein 4;GO:0005634=>nucleus=>swc4_schpo ame: full=swr1-complex protein 4;GO:0006351=>transcription, DNA-dependent=>swc4_schpo ame: full=swr1-complex protein 4;GO:0010468=>regulation of gene expression=>swc4_schpo ame: full=swr1-complex protein 4;GO:0016568=>chromatin modification=>swc4_schpo ame: full=swr1-complex protein 4;GO:0016740=>tran…	PF05499=>DNA methyltransferase 1-associated protein 1 (DMAP1);	IPR008468 (DNA methyltransferase 1-associated 1; IPR009057 (Homeodomain-like)
RirG015640			GO:0043581=>mycelium development=>if4a_ustma ame: full=atp-dependent rna helicase eif4a ame: full=eukaryotic initiation factor 4a short=eif-4a ame: full=translation initiation factor 1;GO:0097159=>organic cyclic compound binding=>if4a_ustma ame: full=atp-dependent rna helicase eif4a ame: full=eukaryotic initiation factor 4a short=eif-4a ame: full=translation initiation factor 1;GO:1901363=>hetero…	PF00270=>DEAD/DEAH box helicase;PF00271=>Helicase conserved C-terminal domain;	IPR001650 (Helicase, C-terminal; IPR014014 (RNA helicase, DEAD-box type, Q motif; IPR014021 (Helicase, superfamily 1/2, ATP-binding domain)
RirG015650			GO:0003682=>chromatin binding=>tf3a_ranpi ame: full=transcription factor iiia short=tfiiia;GO:0003700=>sequence-specific DNA binding transcription factor activity=>tf3a_ranpi ame: full=transcription factor iiia short=tfiiia;GO:0006357=>regulation of transcription from RNA polymerase II promoter=>tf3a_ranpi ame: full=transcription factor iiia short=tfiiia;GO:0007399=>nervous system development=>tf…		IPR013087 (Zinc finger, C2H2-type/integrase, DNA-binding)
RirG015660
RirG015670	4084	4084_1	GO:0005783=>endoplasmic reticulum=>alg6_schpo ame: full=probable dolichyl pyrophosphate man9 c2 alpha- -glucosyltransferase ame: full=asparagine-linked glycosylation protein 6 ame: full=dol-p-glc:man c -pp-dol alpha- -glucosyltransferase ame: full=dolichyl-p-glc:man9 c2-pp-dolichyl glucosyltransferase;GO:0006487=>protein N-linked glycosylation=>alg6_schpo ame: full=probable dolichyl pyrophosphate…	PF03155=>ALG6;ALG8 glycosyltransferase family;	IPR004856 (Glycosyl transferase, ALG6/ALG8)
RirG015680	2287	2287_1	GO:0004164=>diphthine synthase activity=>dph5_gibze ame: full=diphthine synthase ame: full=diphthamide biosynthesis methyltransferase;GO:0005737=>cytoplasm=>dph5_gibze ame: full=diphthine synthase ame: full=diphthamide biosynthesis methyltransferase;GO:0009220=>pyrimidine ribonucleotide biosynthetic process=>dph5_gibze ame: full=diphthine synthase ame: full=diphthamide biosynthesis methyltransfer…	PF00590=>Tetrapyrrole (Corrin/Porphyrin) Methylases;	IPR000878 (Tetrapyrrole methylase)
RirG015690	3635	3635_1		PF01026=>TatD related DNase;	IPR001130 (Deoxyribonuclease, TatD-related)
RirG015700	20	20_1
RirG015710	20	20_1
RirG015720	20	20_5
RirG015730	20	20_1
RirG015740				PF00069=>Protein kinase domain;	IPR011009 (Protein kinase-like domain)
RirG015750	14786	14786_1
RirG015760	13	13_2	GO:0005488=>binding=>y9955_dicdi ame: full=probable serine threonine-protein kinase ddb_g0267514;GO:0005622=>intracellular=>y9955_dicdi ame: full=probable serine threonine-protein kinase ddb_g0267514;GO:0009987=>cellular process=>y9955_dicdi ame: full=probable serine threonine-protein kinase ddb_g0267514;GO:0016772=>transferase activity, transferring phosphorus-containing groups=>y9955_dicdi ame:…	PF07714=>Protein tyrosine kinase;	IPR011009 (Protein kinase-like domain)
RirG015770	3713	3713_1		PF08238=>Sel1 repeat;	IPR011990 (Tetratricopeptide-like helical)
RirG015780	671	671_1
RirG015790	7390	7390_1	GO:0001816=>cytokine production=>irak4_human ame: full=interleukin-1 receptor-associated kinase 4 short=irak-4 ame: full=renal carcinoma antigen ny-ren-64;GO:0002224=>toll-like receptor signaling pathway=>irak4_human ame: full=interleukin-1 receptor-associated kinase 4 short=irak-4 ame: full=renal carcinoma antigen ny-ren-64;GO:0004674=>protein serine/threonine kinase activity=>irak4_human ame: f…	PF00069=>Protein kinase domain;	IPR011009 (Protein kinase-like domain)
RirG015800	48	48_12
RirG015810	48	48_4
RirG015820	11189	11189_1		PF07714=>Protein tyrosine kinase;	IPR011009 (Protein kinase-like domain)
RirG015830	835	835_1
RirG015840	835	835_1
RirG015850	670	670_1	GO:0005515=>protein binding=>sacs_mouse ame: full=sacsin ame: full= homolog subfamily c member 29 short=dnajc29;GO:0005737=>cytoplasm=>sacs_mouse ame: full=sacsin ame: full= homolog subfamily c member 29 short=dnajc29;GO:0007275=>multicellular organismal development=>sacs_mouse ame: full=sacsin ame: full= homolog subfamily c member 29 short=dnajc29;GO:0009987=>cellular process=>sacs_mouse ame: fu…	PF00651=>BTB/POZ domain;	IPR003594 (ATPase-like, ATP-binding domain; IPR011333 (BTB/POZ fold; IPR013089 (Kelch-related)
RirG015860	6	6_4		PF07534=>TLD;PF07707=>BTB And C-terminal Kelch;	IPR013089 (Kelch-related)
RirG015870	3218	3218_1		PF00651=>BTB/POZ domain;	IPR011333 (BTB/POZ fold)
RirG015880	14913	14913_1
RirG015890
RirG015900	4142	4142_1	GO:0005739=>mitochondrion=>coq8_yeast ame: full=probable serine threonine-protein kinase mitochondrial ame: full=activity of bc1 complex protein 1 ame: full=coenzyme q protein 8 ame: full=ubiquinone biosynthesis protein coq8 flags: precursor;GO:0009987=>cellular process=>coq8_yeast ame: full=probable serine threonine-protein kinase mitochondrial ame: full=activity of bc1 complex protein 1 ame: fu…	PF03109=>ABC1 family;	IPR004147 (ABC-1)
RirG015910
RirG015920
RirG015930	18	18_1	GO:0022414=>reproductive process=>klh10_rat ame: full=kelch-like protein 10;GO:0044707=>single-multicellular organism process=>klh10_rat ame: full=kelch-like protein 10;GO:0048856=>anatomical structure development=>klh10_rat ame: full=kelch-like protein 10);	PF00651=>BTB/POZ domain;PF07534=>TLD;PF07707=>BTB And C-terminal Kelch;	IPR011333 (BTB/POZ fold; IPR013089 (Kelch-related)
RirG015940	131	131_8
RirG015950	3139	3139_1	GO:0005515=>protein binding=>nduad_pantr ame: full=nadh dehydrogenase 1 alpha subcomplex subunit 13 ame: full=complex i- short=ci- ame: full=nadh-ubiquinone oxidoreductase subunit;GO:0005654=>nucleoplasm=>nduad_pantr ame: full=nadh dehydrogenase 1 alpha subcomplex subunit 13 ame: full=complex i- short=ci- ame: full=nadh-ubiquinone oxidoreductase subunit;GO:0005747=>mitochondrial respiratory chain…	PF06212=>GRIM-19 protein;	IPR009346 (GRIM-19)
RirG015960	2218	2218_1	GO:0009987=>cellular process=>dpo5_schpo ame: full=dna polymerase v short=pol v);	PF04931=>DNA polymerase phi;	IPR007015 (DNA polymerase V)
RirG015970					IPR007015 (DNA polymerase V)
RirG015980	4335	4335_1	GO:0001666=>response to hypoxia=>trxm_chlre ame: full=thioredoxin m- chloroplastic short=trx-m ame: full=thioredoxin-ch2 flags: precursor;GO:0005730=>nucleolus=>trxm_chlre ame: full=thioredoxin m- chloroplastic short=trx-m ame: full=thioredoxin-ch2 flags: precursor;GO:0005739=>mitochondrion=>trxm_chlre ame: full=thioredoxin m- chloroplastic short=trx-m ame: full=thioredoxin-ch2 flags: precursor;G…	PF00085=>Thioredoxin;	IPR005746 (Thioredoxin; IPR012336 (Thioredoxin-like fold)
RirG015990	3332	3332_1	GO:0005515=>protein binding=>tr112_schpo ame: full=multifunctional methyltransferase subunit trm112 ame: full=erf1 methyltransferase subunit trm112 short=erf1 mtase subunit trm112 ame: full=trna methyltransferase 112;GO:0005829=>cytosol=>tr112_schpo ame: full=multifunctional methyltransferase subunit trm112 ame: full=erf1 methyltransferase subunit trm112 short=erf1 mtase subunit trm112 ame: full=…	PF03966=>Trm112p-like protein;	IPR005651 (Uncharacterised protein family UPF0434/Trm112)
RirG016000	6005	6005_1		PF01910=>Domain of unknown function DUF77;	IPR002767 (Protein of unknown function DUF77)
RirG016010	15104	15104_1
RirG016020
RirG016030	16	16_11
RirG016040	56	56_2		PF00651=>BTB/POZ domain;PF07534=>TLD;	IPR011333 (BTB/POZ fold; IPR013089 (Kelch-related)
RirG016050	42	42_2			IPR011009 (Protein kinase-like domain)
RirG016060	7430	7430_1
RirG016070	5827	5827_1
RirG016080	10185	10185_1
RirG016090	3025	3025_1	GO:0000184=>nuclear-transcribed mRNA catabolic process, nonsense-mediated decay=>rbm8a_danre ame: full=rna-binding protein 8a ame: full=rna-binding motif protein 8a ame: full=ribonucleoprotein rbm8a;GO:0000226=>microtubule cytoskeleton organization=>rbm8a_danre ame: full=rna-binding protein 8a ame: full=rna-binding motif protein 8a ame: full=ribonucleoprotein rbm8a;GO:0000398=>mRNA splicing, via …	PF00076=>RNA recognition motif. (a.k.a. RRM;RBD, or RNP domain);	IPR008111 (RNA-binding motif protein 8; IPR012677 (Nucleotide-binding, alpha-beta plait)
RirG016100	3346	3346_1	GO:0008652=>cellular amino acid biosynthetic process=>cys2_schpo ame: full=probable serine-o-acetyltransferase cys2;GO:0016413=>O-acetyltransferase activity=>cys2_schpo ame: full=probable serine-o-acetyltransferase cys2);	PF00561=>alpha/beta hydrolase fold;	IPR008220 (Homoserine acetyltransferase)
RirG016110
RirG016120	377	377_1	GO:0000184=>nuclear-transcribed mRNA catabolic process, nonsense-mediated decay=>rl5_subdo ame: full=60s ribosomal protein l5;GO:0005515=>protein binding=>rl5_subdo ame: full=60s ribosomal protein l5;GO:0005634=>nucleus=>rl5_subdo ame: full=60s ribosomal protein l5;GO:0006364=>rRNA processing=>rl5_subdo ame: full=60s ribosomal protein l5;GO:0006413=>translational initiation=>rl5_subdo ame: full=6…	PF00861=>Ribosomal L18p/L5e family;	IPR005484 (Ribosomal protein L18/L5)
RirG016130	60	60_2		PF07714=>Protein tyrosine kinase;	IPR011009 (Protein kinase-like domain; IPR015783 (Serine/threonine protein kinase-like, ATMRK)
RirG016140
RirG016150	125	125_1
RirG016160	9	9_1
RirG016170				PF01764=>Lipase (class 3);	IPR002921 (Lipase, class 3)
RirG016180	6157	6157_1
RirG016190	15043	15043_1
RirG016200	46	46_1
RirG016210	835	835_1
RirG016220	835	835_1
RirG016230	18	18_2	GO:0022414=>reproductive process=>klh10_rat ame: full=kelch-like protein 10;GO:0044707=>single-multicellular organism process=>klh10_rat ame: full=kelch-like protein 10;GO:0048856=>anatomical structure development=>klh10_rat ame: full=kelch-like protein 10);	PF00651=>BTB/POZ domain;PF07534=>TLD;	IPR011333 (BTB/POZ fold; IPR013089 (Kelch-related)
RirG016240	18	18_2	GO:0009653=>anatomical structure morphogenesis=>klh10_rat ame: full=kelch-like protein 10;GO:0019953=>sexual reproduction=>klh10_rat ame: full=kelch-like protein 10;GO:0046546=>development of primary male sexual characteristics=>klh10_rat ame: full=kelch-like protein 10;GO:0048513=>organ development=>klh10_rat ame: full=kelch-like protein 10;GO:0048608=>reproductive structure development=>klh10_r…	PF00651=>BTB/POZ domain;PF07534=>TLD;	IPR011333 (BTB/POZ fold; IPR013089 (Kelch-related)
RirG016250	35	35_1
RirG016260	8	8_8	GO:0004672=>protein kinase activity=>y9963_dicdi ame: full=probable serine threonine-protein kinase ddb_g0272254;GO:0009987=>cellular process=>y9963_dicdi ame: full=probable serine threonine-protein kinase ddb_g0272254);	PF07714=>Protein tyrosine kinase;	IPR011009 (Protein kinase-like domain)
RirG016270	7	7_3	GO:0002224=>toll-like receptor signaling pathway=>y9844_dicdi ame: full=probable serine threonine-protein kinase ddb_g0282963;GO:0004672=>protein kinase activity=>y9844_dicdi ame: full=probable serine threonine-protein kinase ddb_g0282963;GO:0005488=>binding=>y9844_dicdi ame: full=probable serine threonine-protein kinase ddb_g0282963;GO:0009966=>regulation of signal transduction=>y9844_dicdi ame:…	PF07714=>Protein tyrosine kinase;	IPR011009 (Protein kinase-like domain)
RirG016280	26	26_27
RirG016290	38	38_2
RirG016300	142	142_4
RirG016310	14	14_8	GO:0005739=>mitochondrion=>ybeq_ecoli ame: full=uncharacterized protein;GO:0009987=>cellular process=>ybeq_ecoli ame: full=uncharacterized protein);	PF07714=>Protein tyrosine kinase;PF08238=>Sel1 repeat;	IPR011009 (Protein kinase-like domain; IPR011990 (Tetratricopeptide-like helical)
RirG016320	13	13_2	GO:0004672=>protein kinase activity=>roco5_dicdi ame: full=probable serine threonine-protein kinase roco5 ame: full=ras of complex proteins and c-terminal of roc 5;GO:0005488=>binding=>roco5_dicdi ame: full=probable serine threonine-protein kinase roco5 ame: full=ras of complex proteins and c-terminal of roc 5;GO:0044237=>cellular metabolic process=>roco5_dicdi ame: full=probable serine threonine…	PF07714=>Protein tyrosine kinase;	IPR011009 (Protein kinase-like domain)
RirG016330				PF08613=>Cyclin;	IPR013922 (Cyclin-related 2)
RirG016340	17288	17288_1		PF10181=>GPI-GlcNAc transferase complex;PIG-H component;	IPR019328 (GPI-GlcNAc transferase complex, PIG-H component, conserved domain)
RirG016350	32	32_2
RirG016360	32	32_2
RirG016370
RirG016380	274	274_1
RirG016390	1025	1025_1	GO:0009987=>cellular process=>ybeq_ecoli ame: full=uncharacterized protein;GO:0043231=>intracellular membrane-bounded organelle=>ybeq_ecoli ame: full=uncharacterized protein;GO:0044444=>cytoplasmic part=>ybeq_ecoli ame: full=uncharacterized protein);	PF08238=>Sel1 repeat;	IPR011990 (Tetratricopeptide-like helical)
RirG016400	8	8_4		PF08238=>Sel1 repeat;	IPR011990 (Tetratricopeptide-like helical)
RirG016410	8	8_4	GO:0006915=>apoptotic process=>ybeq_ecoli ame: full=uncharacterized protein;GO:0043231=>intracellular membrane-bounded organelle=>ybeq_ecoli ame: full=uncharacterized protein;GO:0044444=>cytoplasmic part=>ybeq_ecoli ame: full=uncharacterized protein;GO:0050789=>regulation of biological process=>ybeq_ecoli ame: full=uncharacterized protein);	PF08238=>Sel1 repeat;	IPR011990 (Tetratricopeptide-like helical)
RirG016420	3286	3286_1	GO:0005813=>centrosome=>yli2_schpo ame: full=uncharacterized protein;GO:0005886=>plasma membrane=>yli2_schpo ame: full=uncharacterized protein;GO:0045111=>intermediate filament cytoskeleton=>yli2_schpo ame: full=uncharacterized protein);
RirG016430	3286	3286_1
RirG016440	2447	2447_1	GO:0005325=>peroxisomal fatty-acyl-CoA transporter activity=>abcd1_human ame: full=atp-binding cassette sub-family d member 1 ame: full=adrenoleukodystrophy protein short=aldp;GO:0005524=>ATP binding=>abcd1_human ame: full=atp-binding cassette sub-family d member 1 ame: full=adrenoleukodystrophy protein short=aldp;GO:0005739=>mitochondrion=>abcd1_human ame: full=atp-binding cassette sub-family d …	PF00005=>ABC transporter;PF06472=>ABC transporter transmembrane region 2;	IPR003593 (ATPase, AAA+ type, core; IPR011527 (ABC transporter, transmembrane domain, type 1)
RirG016450	4706	4706_1	GO:0000398=>mRNA splicing, via spliceosome=>snip1_rat ame: full=smad nuclear interacting protein 1;GO:0000956=>nuclear-transcribed mRNA catabolic process=>snip1_rat ame: full=smad nuclear interacting protein 1;GO:0003723=>RNA binding=>snip1_rat ame: full=smad nuclear interacting protein 1;GO:0005515=>protein binding=>snip1_rat ame: full=smad nuclear interacting protein 1;GO:0005730=>nucleolus=>sn…	PF00498=>FHA domain;	IPR008984 (SMAD/FHA domain)
RirG016460	894	894_1	GO:0002020=>protease binding=>kex1a_klula ame: full=protease kex1 flags: precursor;GO:0002080=>acrosomal membrane=>kex1a_klula ame: full=protease kex1 flags: precursor;GO:0004252=>serine-type endopeptidase activity=>kex1a_klula ame: full=protease kex1 flags: precursor;GO:0004867=>serine-type endopeptidase inhibitor activity=>kex1a_klula ame: full=protease kex1 flags: precursor;GO:0005615=>extrace…	PF00082=>Subtilase family;PF01483=>Proprotein convertase P-domain;	IPR002884 (Proprotein convertase, P; IPR008979 (Galactose-binding domain-like; IPR015500 (Peptidase S8, subtilisin-related)
RirG016470	5522	5522_1	GO:0006944=>cellular membrane fusion=>fb84_arath ame: full=f-box protein at1g70590;GO:0010200=>response to chitin=>fb84_arath ame: full=f-box protein at1g70590;GO:0048193=>Golgi vesicle transport=>fb84_arath ame: full=f-box protein at1g70590);	PF08238=>Sel1 repeat;	IPR011990 (Tetratricopeptide-like helical)
RirG016480	8	8_11
RirG016490	48	48_6
RirG016500	48	48_1
RirG016510	214	214_1
RirG016520	214	214_1
RirG016530	2905	2905_1
RirG016540	5545	5545_1
RirG016550	7	7_10
RirG016560	1	1_88
RirG016570	557	557_1	GO:0002168=>instar larval development=>cyb5_morap ame: full=cytochrome b5;GO:0004033=>aldo-keto reductase (NADP) activity=>cyb5_morap ame: full=cytochrome b5;GO:0004129=>cytochrome-c oxidase activity=>cyb5_morap ame: full=cytochrome b5;GO:0005741=>mitochondrial outer membrane=>cyb5_morap ame: full=cytochrome b5;GO:0005783=>endoplasmic reticulum=>cyb5_morap ame: full=cytochrome b5;GO:0005811=>lipi…	PF00173=>Cytochrome b5-like Heme/Steroid binding domain;	IPR001199 (Cytochrome b5)
RirG016580	4547	4547_1	GO:0016020=>membrane=>plb1_mondo ame: full=phospholipase membrane-associated short=phospholipase b ame: full=phospholipase b lipase short=plb lip includes: ame: full=phospholipase a2 includes: ame: full=lysophospholipase flags: precursor;GO:0044255=>cellular lipid metabolic process=>plb1_mondo ame: full=phospholipase membrane-associated short=phospholipase b ame: full=phospholipase b lipase short…	PF00657=>GDSL-like Lipase/Acylhydrolase;	IPR001087 (Lipase, GDSL; IPR013830 (Esterase, SGNH hydrolase-type)
RirG016590	2590	2590_1	GO:0005515=>protein binding=>derl1_mouse ame: full=derlin-1 ame: full=degradation in endoplasmic reticulum protein 1 ame: full=der1-like protein 1;GO:0005768=>endosome=>derl1_mouse ame: full=derlin-1 ame: full=degradation in endoplasmic reticulum protein 1 ame: full=der1-like protein 1;GO:0005789=>endoplasmic reticulum membrane=>derl1_mouse ame: full=derlin-1 ame: full=degradation in endoplasmic …	PF04511=>Der1-like family;	IPR007599 (Derlin)
RirG016600
RirG016610	2023	2023_1	GO:0005515=>protein binding=>pfd4_bovin ame: full=prefoldin subunit 4;GO:0005634=>nucleus=>pfd4_bovin ame: full=prefoldin subunit 4;GO:0005739=>mitochondrion=>pfd4_bovin ame: full=prefoldin subunit 4;GO:0016272=>prefoldin complex=>pfd4_bovin ame: full=prefoldin subunit 4;GO:0051084=>'de novo' posttranslational protein folding=>pfd4_bovin ame: full=prefoldin subunit 4);	PF01920=>Prefoldin subunit;	IPR009053 (Prefoldin; IPR016661 (Prefoldin, subunit 4)
RirG016620	783	783_1			IPR013089 (Kelch-related)
RirG016630	1009	1009_1	GO:0001947=>heart looping=>rrp1_drome ame: full=recombination repair protein 1 ame: full=dna-(apurinic or apyrimidinic site) lyase;GO:0003684=>damaged DNA binding=>rrp1_drome ame: full=recombination repair protein 1 ame: full=dna-(apurinic or apyrimidinic site) lyase;GO:0003713=>transcription coactivator activity=>rrp1_drome ame: full=recombination repair protein 1 ame: full=dna-(apurinic or apyr…	PF03372=>Endonuclease/Exonuclease/phosphatase family;	IPR005135 (Endonuclease/exonuclease/phosphatase)
RirG016640	224	224_1	GO:0005515=>protein binding=>udb23_macfa ame: full=udp-glucuronosyltransferase 2b23 short=udpgt 2b23 flags: precursor;GO:0006805=>xenobiotic metabolic process=>udb23_macfa ame: full=udp-glucuronosyltransferase 2b23 short=udpgt 2b23 flags: precursor;GO:0008202=>steroid metabolic process=>udb23_macfa ame: full=udp-glucuronosyltransferase 2b23 short=udpgt 2b23 flags: precursor;GO:0009698=>phenylprop…	PF00201=>UDP-glucoronosyl and UDP-glucosyl transferase;	IPR002213 (UDP-glucuronosyl/UDP-glucosyltransferase)
RirG016650	3216	3216_1
RirG016660	8	8_5	GO:0016772=>transferase activity, transferring phosphorus-containing groups=>ybeq_ecoli ame: full=uncharacterized protein);	PF07714=>Protein tyrosine kinase;PF08238=>Sel1 repeat;	IPR011009 (Protein kinase-like domain; IPR011990 (Tetratricopeptide-like helical)
RirG016670	25	25_14		PF01344=>Kelch motif;PF07646=>Kelch motif;	IPR015915 (Kelch-type beta propeller)
RirG016680	7	7_1	GO:0002224=>toll-like receptor signaling pathway=>gdt4_dicdi ame: full=probable serine threonine-protein kinase gdt4 ame: full=growth-differentiation transition protein 4 flags: precursor;GO:0004674=>protein serine/threonine kinase activity=>gdt4_dicdi ame: full=probable serine threonine-protein kinase gdt4 ame: full=growth-differentiation transition protein 4 flags: precursor;GO:0007254=>JNK cas…	PF07714=>Protein tyrosine kinase;	IPR011009 (Protein kinase-like domain)
RirG016690	1	1_112
RirG016700	1980	1980_1	GO:0001578=>microtubule bundle formation=>msp1_yeast ame: full=protein msp1 ame: full=tat-binding homolog 4;GO:0002092=>positive regulation of receptor internalization=>msp1_yeast ame: full=protein msp1 ame: full=tat-binding homolog 4;GO:0005634=>nucleus=>msp1_yeast ame: full=protein msp1 ame: full=tat-binding homolog 4;GO:0005739=>mitochondrion=>msp1_yeast ame: full=protein msp1 ame: full=tat-bi…	PF00004=>ATPase family associated with various cellular activities (AAA);	IPR003593 (ATPase, AAA+ type, core)
RirG016710	142	142_4
RirG016720	1241	1241_1			IPR011335 (Restriction endonuclease, type II-like)
RirG016730	1892	1892_1	GO:0005515=>protein binding=>tfb2_yarli ame: full=rna polymerase ii transcription factor b subunit 2 ame: full=rna polymerase ii transcription factor b 52 kda subunit ame: full=rna polymerase ii transcription factor b p52 subunit;GO:0005675=>holo TFIIH complex=>tfb2_yarli ame: full=rna polymerase ii transcription factor b subunit 2 ame: full=rna polymerase ii transcription factor b 52 kda subunit…	PF03849=>Transcription factor Tfb2;	IPR004598 (Transcription factor Tfb2)
RirG016740	12021	12021_1
RirG016750	7636	7636_1
RirG016760	1959	1959_1	GO:0005515=>protein binding=>vps18_danre ame: full=vacuolar protein sorting-associated protein 18 homolog;GO:0006810=>transport=>vps18_danre ame: full=vacuolar protein sorting-associated protein 18 homolog;GO:0007032=>endosome organization=>vps18_danre ame: full=vacuolar protein sorting-associated protein 18 homolog;GO:0007040=>lysosome organization=>vps18_danre ame: full=vacuolar protein sorting…	PF00637=>Region in Clathrin and VPS;PF05131=>Pep3/Vps18/deep orange family;	IPR007810 (Pep3/Vps18/deep orange; IPR013083 (Zinc finger, RING/FYVE/PHD-type)
RirG016770
RirG016780	4344	4344_1
RirG016790	7	7_5	GO:0004674=>protein serine/threonine kinase activity=>y9963_dicdi ame: full=probable serine threonine-protein kinase ddb_g0272254;GO:0005622=>intracellular=>y9963_dicdi ame: full=probable serine threonine-protein kinase ddb_g0272254;GO:0019899=>enzyme binding=>y9963_dicdi ame: full=probable serine threonine-protein kinase ddb_g0272254;GO:0032147=>activation of protein kinase activity=>y9963_dicdi…	PF07714=>Protein tyrosine kinase;	IPR011009 (Protein kinase-like domain)
RirG016800				PF00012=>Hsp70 protein;	IPR001023 (Heat shock protein Hsp70)
RirG016810	6	6_1	GO:0005488=>binding=>btbd9_rat ame: full=btb poz domain-containing protein 9;GO:0009987=>cellular process=>btbd9_rat ame: full=btb poz domain-containing protein 9;GO:0044424=>intracellular part=>btbd9_rat ame: full=btb poz domain-containing protein 9);	PF00651=>BTB/POZ domain;PF07534=>TLD;PF07707=>BTB And C-terminal Kelch;	IPR006571 (TLDc; IPR011333 (BTB/POZ fold; IPR013089 (Kelch-related)
RirG016820	4622	4622_1
RirG016830	11167	11167_1
RirG016840	6	6_1	GO:0005488=>binding=>kbtba_human ame: full=kelch repeat and btb domain-containing protein 10 ame: full=kel-like protein 23 ame: full=kelch-related protein 1 ame: full=sarcosin;GO:0009987=>cellular process=>kbtba_human ame: full=kelch repeat and btb domain-containing protein 10 ame: full=kel-like protein 23 ame: full=kelch-related protein 1 ame: full=sarcosin;GO:0044424=>intracellular part=>kbtba_…	PF00651=>BTB/POZ domain;PF07534=>TLD;PF07707=>BTB And C-terminal Kelch;	IPR011333 (BTB/POZ fold; IPR013089 (Kelch-related)
RirG016850	4610	4610_1
RirG016860	3078	3078_1	GO:0005794=>Golgi apparatus=>cegt_rat ame: full=ceramide glucosyltransferase ame: full=glct-1 ame: full=glucosylceramide synthase short=gcs ame: full=udp-glucose ceramide glucosyltransferase ame: full=udp-glucose:n-acylsphingosine d-glucosyltransferase;GO:0006688=>glycosphingolipid biosynthetic process=>cegt_rat ame: full=ceramide glucosyltransferase ame: full=glct-1 ame: full=glucosylceramide sy…	PF00535=>Glycosyl transferase family 2;	IPR001173 (Glycosyl transferase, family 2)
RirG016870	161	161_1
RirG016880	56	56_1	GO:0009987=>cellular process=>enc2_rat ame: full=ectoderm-neural cortex protein 2 short=enc-2 ame: full=kelch-like protein 25;GO:0044424=>intracellular part=>enc2_rat ame: full=ectoderm-neural cortex protein 2 short=enc-2 ame: full=kelch-like protein 25);	PF00651=>BTB/POZ domain;PF07707=>BTB And C-terminal Kelch;	IPR011333 (BTB/POZ fold; IPR013089 (Kelch-related)
RirG016890	22	22_1	GO:0002009=>morphogenesis of an epithelium=>spka_dicdi ame: full=stress-activated protein kinase alpha short=sapk-alpha;GO:0002224=>toll-like receptor signaling pathway=>spka_dicdi ame: full=stress-activated protein kinase alpha short=sapk-alpha;GO:0002252=>immune effector process=>spka_dicdi ame: full=stress-activated protein kinase alpha short=sapk-alpha;GO:0004674=>protein serine/threonine kin…	PF07714=>Protein tyrosine kinase;	IPR011009 (Protein kinase-like domain)
RirG016900
RirG016910	807	807_1	GO:0005515=>protein binding=>ap2s_neucr ame: full=ap-2 complex subunit sigma ame: full=adaptin small chain ame: full=clathrin assembly protein 2 small chain ame: full=sigma2-adaptin;GO:0005765=>lysosomal membrane=>ap2s_neucr ame: full=ap-2 complex subunit sigma ame: full=adaptin small chain ame: full=clathrin assembly protein 2 small chain ame: full=sigma2-adaptin;GO:0005829=>cytosol=>ap2s_neucr …	PF01217=>Clathrin adaptor complex small chain;	IPR016635 (Adaptor protein complex, sigma subunit)
RirG016920	6945	6945_1
RirG016930	2106	2106_1			IPR010998 (Integrase, Lambda-type, N-terminal; IPR013762 (Integrase-like, catalytic core, phage; IPR023109 (Integrase/recombinase, N-terminal)
RirG016940	104	104_2	GO:0001932=>regulation of protein phosphorylation=>y1199_dicdi ame: full=probable serine threonine-protein kinase ddb_g0282895;GO:0005003=>ephrin receptor activity=>y1199_dicdi ame: full=probable serine threonine-protein kinase ddb_g0282895;GO:0005515=>protein binding=>y1199_dicdi ame: full=probable serine threonine-protein kinase ddb_g0282895;GO:0005622=>intracellular=>y1199_dicdi ame: full=prob…	PF07714=>Protein tyrosine kinase;	IPR011009 (Protein kinase-like domain)
RirG016950	2477	2477_1	GO:0005515=>protein binding=>ybeq_ecoli ame: full=uncharacterized protein;GO:0016020=>membrane=>ybeq_ecoli ame: full=uncharacterized protein);	PF08238=>Sel1 repeat;	IPR011990 (Tetratricopeptide-like helical)
RirG016960	3742	3742_1
RirG016970	17302	17302_1
RirG016980				PF00690=>Cation transporter/ATPase;N-terminus;	IPR004014 (ATPase, P-type cation-transporter, N-terminal)
RirG016990	7417	7417_1
RirG017000
RirG017010	2098	2098_1
RirG017020	69	69_1	GO:0005488=>binding=>cp3a8_macfa ame: full=cytochrome p450 3a8 ame: full=cypiiia8 ame: full=cytochrome p-450-mk2 ame: full=cytochrome p450-mknf2;GO:0005739=>mitochondrion=>cp3a8_macfa ame: full=cytochrome p450 3a8 ame: full=cypiiia8 ame: full=cytochrome p-450-mk2 ame: full=cytochrome p450-mknf2;GO:0008202=>steroid metabolic process=>cp3a8_macfa ame: full=cytochrome p450 3a8 ame: full=cypiiia8 ame…	PF00067=>Cytochrome P450;	IPR001128 (Cytochrome P450)
RirG017030	215	215_1	GO:0000086=>G2/M transition of mitotic cell cycle=>tba1c_crigr ame: full=tubulin alpha-1c chain ame: full=alpha-tubulin 3 ame: full=alpha-tubulin iii ame: full=tubulin alpha-3 chain;GO:0000235=>astral microtubule=>tba1c_crigr ame: full=tubulin alpha-1c chain ame: full=alpha-tubulin 3 ame: full=alpha-tubulin iii ame: full=tubulin alpha-3 chain;GO:0000910=>cytokinesis=>tba1c_crigr ame: full=tubulin…	PF00091=>Tubulin/FtsZ family;GTPase domain;PF03953=>Tubulin C-terminal domain;	IPR000217 (Tubulin; IPR023123 (Tubulin, C-terminal)
RirG017040	12722	12722_1
RirG017050	22	22_7	GO:0000166=>nucleotide binding=>phg2_dicdi ame: full=serine threonine-protein kinase phg2;GO:0000186=>activation of MAPKK activity=>phg2_dicdi ame: full=serine threonine-protein kinase phg2;GO:0001819=>positive regulation of cytokine production=>phg2_dicdi ame: full=serine threonine-protein kinase phg2;GO:0002224=>toll-like receptor signaling pathway=>phg2_dicdi ame: full=serine threonine-protein…	PF07714=>Protein tyrosine kinase;	IPR011009 (Protein kinase-like domain)
RirG017060	1584	1584_1
RirG017070	20	20_3
RirG017080	6	6_2		PF00651=>BTB/POZ domain;PF07534=>TLD;PF07707=>BTB And C-terminal Kelch;	IPR011333 (BTB/POZ fold; IPR013089 (Kelch-related)
RirG017090	586	586_1
RirG017100	1617	1617_1	GO:0004674=>protein serine/threonine kinase activity=>cdpkc_arath ame: full=calcium-dependent protein kinase 12 ame: full=calcium-dependent protein kinase isoform cdpk9 short= 9;GO:0006468=>protein phosphorylation=>cdpkc_arath ame: full=calcium-dependent protein kinase 12 ame: full=calcium-dependent protein kinase isoform cdpk9 short= 9;GO:0006952=>defense response=>cdpkc_arath ame: full=calcium-…	PF00036=>EF hand;	IPR011992 (EF-hand-like domain)
RirG017110	2888	2888_1		PF00004=>ATPase family associated with various cellular activities (AAA);	IPR003593 (ATPase, AAA+ type, core)
RirG017120	2888	2888_1		PF00004=>ATPase family associated with various cellular activities (AAA);	IPR003959 (ATPase, AAA-type, core)
RirG017130	57	57_2	GO:0009987=>cellular process=>yr815_mimiv ame: full= sel1-like repeat-containing protein r815);	PF08238=>Sel1 repeat;	IPR011990 (Tetratricopeptide-like helical)
RirG017140	5540	5540_1			IPR009071 (High mobility group, superfamily)
RirG017150			GO:0005719=>nuclear euchromatin=>cbx3_mouse ame: full=chromobox protein homolog 3 ame: full=heterochromatin protein 1 homolog gamma short=hp1 gamma ame: full=m32 ame: full=modifier 2 protein;GO:0005720=>nuclear heterochromatin=>cbx3_mouse ame: full=chromobox protein homolog 3 ame: full=heterochromatin protein 1 homolog gamma short=hp1 gamma ame: full=m32 ame: full=modifier 2 protein;GO:0005721=>c…	PF00385=>Chromo (CHRromatin Organisation MOdifier) domain;	IPR016197 (Chromo domain-like)
RirG017160	5422	5422_1	GO:0005488=>binding=>mfeb_dicdi ame: full=probable enoyl- hydratase 2 ame: full=mfe-2 ame: full=multifunctional enzyme b short=mfe-b;GO:0005777=>peroxisome=>mfeb_dicdi ame: full=probable enoyl- hydratase 2 ame: full=mfe-2 ame: full=multifunctional enzyme b short=mfe-b;GO:0006635=>fatty acid beta-oxidation=>mfeb_dicdi ame: full=probable enoyl- hydratase 2 ame: full=mfe-2 ame: full=multifunctional …	PF01575=>MaoC like domain;	IPR002198 (Short-chain dehydrogenase/reductase SDR; IPR002539 (MaoC-like dehydratase)
RirG017170	1266	1266_1		PF04433=>SWIRM domain;	IPR007526 (SWIRM; IPR009057 (Homeodomain-like)
RirG017180			GO:0003774=>motor activity=>myo1_ustma ame: full=myosin-1 ame: full=class i unconventional myosin ame: full=type i myosin;GO:0003779=>actin binding=>myo1_ustma ame: full=myosin-1 ame: full=class i unconventional myosin ame: full=type i myosin;GO:0005524=>ATP binding=>myo1_ustma ame: full=myosin-1 ame: full=class i unconventional myosin ame: full=type i myosin;GO:0006898=>receptor-mediated endocyt…	PF00063=>Myosin head (motor domain);	IPR001609 (Myosin head, motor domain)
RirG017190	250	250_1	GO:0005524=>ATP binding=>hsp83_iponi ame: full=heat shock protein 83;GO:0005618=>cell wall=>hsp83_iponi ame: full=heat shock protein 83;GO:0005730=>nucleolus=>hsp83_iponi ame: full=heat shock protein 83;GO:0005739=>mitochondrion=>hsp83_iponi ame: full=heat shock protein 83;GO:0005774=>vacuolar membrane=>hsp83_iponi ame: full=heat shock protein 83;GO:0005794=>Golgi apparatus=>hsp83_iponi ame: full…	PF00183=>Hsp90 protein;	IPR001404 (Heat shock protein Hsp90)
RirG017200	1434	1434_1
RirG017210	5246	5246_1
RirG017220	5248	5248_1
RirG017230	272	272_3
RirG017240	594	594_1
RirG017250	6	6_9	GO:0005515=>protein binding=>btbd9_human ame: full=btb poz domain-containing protein 9;GO:0005634=>nucleus=>btbd9_human ame: full=btb poz domain-containing protein 9;GO:0043232=>intracellular non-membrane-bounded organelle=>btbd9_human ame: full=btb poz domain-containing protein 9;GO:0044238=>primary metabolic process=>btbd9_human ame: full=btb poz domain-containing protein 9;GO:0044260=>cellular…	PF00651=>BTB/POZ domain;PF07534=>TLD;PF07707=>BTB And C-terminal Kelch;	IPR011333 (BTB/POZ fold; IPR013089 (Kelch-related)
RirG017260	4925	4925_1	GO:0003723=>RNA binding=>samh1_dicdi ame: full=protein samhd1 homolog ame: full=hd phosphohydrolase domain-containing protein;GO:0005634=>nucleus=>samh1_dicdi ame: full=protein samhd1 homolog ame: full=hd phosphohydrolase domain-containing protein;GO:0045088=>regulation of innate immune response=>samh1_dicdi ame: full=protein samhd1 homolog ame: full=hd phosphohydrolase domain-containing protein;…	PF01966=>HD domain;	IPR003607 (Metal-dependent phosphohydrolase, HD domain; IPR023279 (HD domain)
RirG017270	833	833_1		PF00505=>HMG (high mobility group) box;	IPR009071 (High mobility group, superfamily)
RirG017280	8929	8929_1	GO:0000122=>negative regulation of transcription from RNA polymerase II promoter=>nhp6_emeni ame: full=non-histone chromosomal protein 6;GO:0003677=>DNA binding=>nhp6_emeni ame: full=non-histone chromosomal protein 6;GO:0005634=>nucleus=>nhp6_emeni ame: full=non-histone chromosomal protein 6;GO:0005694=>chromosome=>nhp6_emeni ame: full=non-histone chromosomal protein 6;GO:0008134=>transcription f…	PF00505=>HMG (high mobility group) box;	IPR009071 (High mobility group, superfamily)
RirG017290	590	590_1	GO:0002119=>nematode larval development=>mpcp_schpo ame: full=probable mitochondrial phosphate carrier protein;GO:0005743=>mitochondrial inner membrane=>mpcp_schpo ame: full=probable mitochondrial phosphate carrier protein;GO:0005887=>integral to plasma membrane=>mpcp_schpo ame: full=probable mitochondrial phosphate carrier protein;GO:0006091=>generation of precursor metabolites and energy=>mpcp_…	PF00153=>Mitochondrial carrier protein;	IPR001993 (Mitochondrial substrate carrier)
RirG017300	870	870_1	GO:0000184=>nuclear-transcribed mRNA catabolic process, nonsense-mediated decay=>rl7_neucr ame: full=60s ribosomal protein l7;GO:0001510=>RNA methylation=>rl7_neucr ame: full=60s ribosomal protein l7;GO:0002119=>nematode larval development=>rl7_neucr ame: full=60s ribosomal protein l7;GO:0003677=>DNA binding=>rl7_neucr ame: full=60s ribosomal protein l7;GO:0003729=>mRNA binding=>rl7_neucr ame: fu…	PF00327=>Ribosomal protein L30p/L7e;PF08079=>Ribosomal L30 N-terminal domain;	IPR005998 (Ribosomal protein L7, eukaryotic)
RirG017310	7324	7324_1		PF00617=>RasGEF domain;PF07145=>Ataxin-2 C-terminal region;	IPR008937 (Ras guanine nucleotide exchange factor; IPR009818 (Ataxin-2, C-terminal)
RirG017320	4295	4295_1		PF02845=>CUE domain;	IPR003892 (Ubiquitin system component Cue)
RirG017330	3876	3876_1	GO:0000794=>condensed nuclear chromosome=>msh5_mouse ame: full= protein homolog 5;GO:0006281=>DNA repair=>msh5_mouse ame: full= protein homolog 5;GO:0006310=>DNA recombination=>msh5_mouse ame: full= protein homolog 5;GO:0007059=>chromosome segregation=>msh5_mouse ame: full= protein homolog 5;GO:0007129=>synapsis=>msh5_mouse ame: full= protein homolog 5;GO:0007276=>gamete generation=>msh5_mouse am…	PF00488=>MutS domain V;PF05190=>MutS family domain IV;PF05192=>MutS domain III;	IPR000432 (DNA mismatch repair protein MutS, C-terminal; IPR007696 (DNA mismatch repair protein MutS, core)
RirG017340	671	671_1		PF03184=>DDE superfamily endonuclease;	IPR004875 (DDE superfamily endonuclease, CENP-B-like)
RirG017350	11791	11791_1	GO:0003676=>nucleic acid binding=>srr55_drome ame: full=serine-arginine protein 55 short=srp55 ame: full=52 kda bracketing protein ame: full=b52 protein ame: full=protein enhancer of deformed;GO:0005730=>nucleolus=>srr55_drome ame: full=serine-arginine protein 55 short=srp55 ame: full=52 kda bracketing protein ame: full=b52 protein ame: full=protein enhancer of deformed;GO:0005737=>cytoplasm=>srr…	PF00076=>RNA recognition motif. (a.k.a. RRM;RBD, or RNP domain);	IPR012677 (Nucleotide-binding, alpha-beta plait)
RirG017360	599	599_1
RirG017370	1414	1414_1			IPR009003 (Peptidase cysteine/serine, trypsin-like)
RirG017380	90	90_3		PF04313=>Type I restriction enzyme R protein N terminus (HSDR_N);	IPR007409 (Restriction endonuclease, type I, EcoRI, R subunit/Type III, Res subunit, N-terminal)
RirG017390	15069	15069_1
RirG017400	2901	2901_1		PF00069=>Protein kinase domain;	IPR020636 (Calcium/calmodulin-dependent protein kinase-like)
RirG017410	12870	12870_1	GO:0000122=>negative regulation of transcription from RNA polymerase II promoter=>ubc4_schpo ame: full=ubiquitin-conjugating enzyme e2 4 ame: full=ubiquitin carrier protein 4 ame: full=ubiquitin-protein ligase 4;GO:0002119=>nematode larval development=>ubc4_schpo ame: full=ubiquitin-conjugating enzyme e2 4 ame: full=ubiquitin carrier protein 4 ame: full=ubiquitin-protein ligase 4;GO:0004842=>ubiq…	PF00179=>Ubiquitin-conjugating enzyme;	IPR016135 (Ubiquitin-conjugating enzyme/RWD-like; IPR023313 (Ubiquitin-conjugating enzyme, active site)
RirG017420
RirG017430	2547	2547_1			IPR007496 (Uncharacterised protein family CysZ)
RirG017440	1432	1432_1
RirG017450	1432	1432_1
RirG017460	94	94_1	GO:0000003=>reproduction=>drkd_dicdi ame: full=probable serine threonine-protein kinase drkd ame: full=receptor-like kinase d;GO:0004674=>protein serine/threonine kinase activity=>drkd_dicdi ame: full=probable serine threonine-protein kinase drkd ame: full=receptor-like kinase d;GO:0005057=>receptor signaling protein activity=>drkd_dicdi ame: full=probable serine threonine-protein kinase drkd ame…	PF00069=>Protein kinase domain;	IPR011009 (Protein kinase-like domain)
RirG017470	132	132_1		PF05699=>hAT family dimerisation domain;	IPR008906 (HAT dimerisation; IPR012337 (Ribonuclease H-like)
RirG017480	132	132_5			IPR012337 (Ribonuclease H-like)
RirG017490			GO:0003723=>RNA binding=>samh1_dicdi ame: full=protein samhd1 homolog ame: full=hd phosphohydrolase domain-containing protein;GO:0005634=>nucleus=>samh1_dicdi ame: full=protein samhd1 homolog ame: full=hd phosphohydrolase domain-containing protein;GO:0045088=>regulation of innate immune response=>samh1_dicdi ame: full=protein samhd1 homolog ame: full=hd phosphohydrolase domain-containing protein;…	PF01966=>HD domain;	IPR003607 (Metal-dependent phosphohydrolase, HD domain; IPR023279 (HD domain)
RirG017500	2717	2717_1	GO:0004672=>protein kinase activity=>npr2_schpo ame: full=nitrogen permease regulator 2 homolog;GO:0005515=>protein binding=>npr2_schpo ame: full=nitrogen permease regulator 2 homolog;GO:0005737=>cytoplasm=>npr2_schpo ame: full=nitrogen permease regulator 2 homolog;GO:0006468=>protein phosphorylation=>npr2_schpo ame: full=nitrogen permease regulator 2 homolog;GO:0033673=>negative regulation of ki…	PF06218=>Nitrogen permease regulator 2;	IPR009348 (Nitrogen permease regulator 2)
RirG017510			GO:0005515=>protein binding=>actnb_dicdi ame: full=interaptin ame: full=actin-binding protein d ame: full=alpha-actinin b;GO:0005856=>cytoskeleton=>actnb_dicdi ame: full=interaptin ame: full=actin-binding protein d ame: full=alpha-actinin b;GO:0006928=>cellular component movement=>actnb_dicdi ame: full=interaptin ame: full=actin-binding protein d ame: full=alpha-actinin b;GO:0007010=>cytoskeleton…
RirG017520	3145	3145_1	GO:0007275=>multicellular organismal development=>yg1b_schpo ame: full= transporter;GO:0008514=>organic anion transmembrane transporter activity=>yg1b_schpo ame: full= transporter;GO:0009941=>chloroplast envelope=>yg1b_schpo ame: full= transporter;GO:0015301=>anion:anion antiporter activity=>yg1b_schpo ame: full= transporter;GO:0015717=>triose phosphate transport=>yg1b_schpo ame: full= transporte…	PF03151=>Triose-phosphate Transporter family;	IPR004853 (Domain of unknown function DUF250)
RirG017530	90	90_14
RirG017540	6562	6562_1
RirG017550	5242	5242_1	GO:0009987=>cellular process=>yr818_mimiv ame: full= serine threonine-protein kinase receptor r818 flags: precursor;GO:0016772=>transferase activity, transferring phosphorus-containing groups=>yr818_mimiv ame: full= serine threonine-protein kinase receptor r818 flags: precursor);		IPR011009 (Protein kinase-like domain)
RirG017560	837	837_1	GO:0016787=>hydrolase activity=>aql1_theaq ame: full=aqualysin-1 ame: full=aqualysin-i flags: precursor);	PF00082=>Subtilase family;PF05922=>Peptidase inhibitor I9;	IPR015500 (Peptidase S8, subtilisin-related)
RirG017570	311	311_1	GO:0000165=>MAPK cascade=>ht1_arath ame: full=serine threonine-protein kinase ht1 ame: full=high leaf temperature protein 1;GO:0004672=>protein kinase activity=>ht1_arath ame: full=serine threonine-protein kinase ht1 ame: full=high leaf temperature protein 1;GO:0005515=>protein binding=>ht1_arath ame: full=serine threonine-protein kinase ht1 ame: full=high leaf temperature protein 1;GO:0006468=>p…	PF00069=>Protein kinase domain;	IPR011009 (Protein kinase-like domain)
RirG017580	3317	3317_1		PF09335=>SNARE associated Golgi protein;	IPR015414 (SNARE associated Golgi protein)
RirG017590	2419	2419_1	GO:0005515=>protein binding=>vps11_dicdi ame: full=vacuolar protein sorting-associated protein 11 homolog;GO:0005768=>endosome=>vps11_dicdi ame: full=vacuolar protein sorting-associated protein 11 homolog;GO:0030139=>endocytic vesicle=>vps11_dicdi ame: full=vacuolar protein sorting-associated protein 11 homolog;GO:0030897=>HOPS complex=>vps11_dicdi ame: full=vacuolar protein sorting-associated pr…	PF00637=>Region in Clathrin and VPS;PF12451=>Vacuolar protein sorting protein 11 C terminal;	IPR011990 (Tetratricopeptide-like helical; IPR015943 (WD40/YVTN repeat-like-containing domain; IPR016528 (Vacuolar protein sorting-associated protein 11)
RirG017600	423	423_2	GO:0001703=>gastrulation with mouth forming first=>pdi_humin ame: full=protein disulfide-isomerase short=pdi flags: precursor;GO:0002119=>nematode larval development=>pdi_humin ame: full=protein disulfide-isomerase short=pdi flags: precursor;GO:0003756=>protein disulfide isomerase activity=>pdi_humin ame: full=protein disulfide-isomerase short=pdi flags: precursor;GO:0003810=>protein-glutamine ga…	PF00085=>Thioredoxin;	IPR005746 (Thioredoxin; IPR005792 (Protein disulphide isomerase; IPR012336 (Thioredoxin-like fold)
RirG017610
RirG017620			GO:0003713=>transcription coactivator activity=>ing1_arath ame: full=phd finger protein ing1 ame: full=protein inhibitor of growth 1 short=protein 1;GO:0004402=>histone acetyltransferase activity=>ing1_arath ame: full=phd finger protein ing1 ame: full=protein inhibitor of growth 1 short=protein 1;GO:0006260=>DNA replication=>ing1_arath ame: full=phd finger protein ing1 ame: full=protein inhibitor…	PF00628=>PHD-finger;	IPR013083 (Zinc finger, RING/FYVE/PHD-type)
RirG017630	76	76_5
RirG017640	20	20_5
RirG017650	20	20_3
RirG017660	22	22_3	GO:0004713=>protein tyrosine kinase activity=>jak1_mouse ame: full=tyrosine-protein kinase jak1 ame: full=janus kinase 1 short=jak-1;GO:0005515=>protein binding=>jak1_mouse ame: full=tyrosine-protein kinase jak1 ame: full=janus kinase 1 short=jak-1;GO:0006468=>protein phosphorylation=>jak1_mouse ame: full=tyrosine-protein kinase jak1 ame: full=janus kinase 1 short=jak-1;GO:0007166=>cell surface r…	PF00069=>Protein kinase domain;	IPR011009 (Protein kinase-like domain)
RirG017670	884	884_1
RirG017680	311	311_1	GO:0000075=>cell cycle checkpoint=>yr818_mimiv ame: full= serine threonine-protein kinase receptor r818 flags: precursor;GO:0000166=>nucleotide binding=>yr818_mimiv ame: full= serine threonine-protein kinase receptor r818 flags: precursor;GO:0000186=>activation of MAPKK activity=>yr818_mimiv ame: full= serine threonine-protein kinase receptor r818 flags: precursor;GO:0004709=>MAP kinase kinase ki…	PF00069=>Protein kinase domain;	IPR011009 (Protein kinase-like domain)
RirG017690	4341	4341_1		PF00651=>BTB/POZ domain;	IPR008979 (Galactose-binding domain-like; IPR011333 (BTB/POZ fold; IPR013089 (Kelch-related)
RirG017700	25	25_18			IPR015916 (Galactose oxidase, beta-propeller)
RirG017710	189	189_1
RirG017720	189	189_1
RirG017730	6	6_1		PF00651=>BTB/POZ domain;PF07534=>TLD;PF07707=>BTB And C-terminal Kelch;	IPR011333 (BTB/POZ fold; IPR013089 (Kelch-related)
RirG017740	665	665_1		PF07534=>TLD;PF07707=>BTB And C-terminal Kelch;	IPR011705 (BTB/Kelch-associated)
RirG017750			GO:0004340=>glucokinase activity=>hxk1_aspfu ame: full=hexokinase-1 ame: full=hexokinase i;GO:0005515=>protein binding=>hxk1_aspfu ame: full=hexokinase-1 ame: full=hexokinase i;GO:0005524=>ATP binding=>hxk1_aspfu ame: full=hexokinase-1 ame: full=hexokinase i;GO:0005536=>glucose binding=>hxk1_aspfu ame: full=hexokinase-1 ame: full=hexokinase i;GO:0005730=>nucleolus=>hxk1_aspfu ame: full=hexokinase…	PF03727=>Hexokinase;	IPR001312 (Hexokinase)
RirG017760	13	13_2	GO:0009987=>cellular process=>y9955_dicdi ame: full=probable serine threonine-protein kinase ddb_g0267514;GO:0016301=>kinase activity=>y9955_dicdi ame: full=probable serine threonine-protein kinase ddb_g0267514);	PF07714=>Protein tyrosine kinase;	IPR011009 (Protein kinase-like domain)
RirG017770	14	14_1	GO:0004674=>protein serine/threonine kinase activity=>y9847_dicdi ame: full=probable serine threonine-protein kinase ddb_g0267686;GO:0005488=>binding=>y9847_dicdi ame: full=probable serine threonine-protein kinase ddb_g0267686;GO:0005737=>cytoplasm=>y9847_dicdi ame: full=probable serine threonine-protein kinase ddb_g0267686;GO:0006915=>apoptotic process=>y9847_dicdi ame: full=probable serine thre…	PF00069=>Protein kinase domain;PF08238=>Sel1 repeat;	IPR011009 (Protein kinase-like domain; IPR011990 (Tetratricopeptide-like helical)
RirG017780	2407	2407_1	GO:0003923=>GPI-anchor transamidase activity=>gpi8_human ame: full=gpi-anchor transamidase short=gpi transamidase ame: full=gpi8 homolog short=hgpi8 ame: full=phosphatidylinositol-glycan biosynthesis class k protein short=pig-k flags: precursor;GO:0004197=>cysteine-type endopeptidase activity=>gpi8_human ame: full=gpi-anchor transamidase short=gpi transamidase ame: full=gpi8 homolog short=hgpi8 a…	PF01650=>Peptidase C13 family;	IPR001096 (Peptidase C13, legumain)
RirG017790	4624	4624_1
RirG017800	3290	3290_1	GO:0005684=>U2-type spliceosomal complex=>syf2_schpo ame: full=pre-mrna-splicing factor syf2;GO:0006396=>RNA processing=>syf2_schpo ame: full=pre-mrna-splicing factor syf2;GO:0071013=>catalytic step 2 spliceosome=>syf2_schpo ame: full=pre-mrna-splicing factor syf2);	PF08231=>SYF2 splicing factor;	IPR013260 (mRNA splicing factor SYF2)
RirG017810	2236	2236_1	GO:0003723=>RNA binding=>rrp3_crynb ame: full=atp-dependent rrna helicase rrp3;GO:0005515=>protein binding=>rrp3_crynb ame: full=atp-dependent rrna helicase rrp3;GO:0005524=>ATP binding=>rrp3_crynb ame: full=atp-dependent rrna helicase rrp3;GO:0005730=>nucleolus=>rrp3_crynb ame: full=atp-dependent rrna helicase rrp3;GO:0006364=>rRNA processing=>rrp3_crynb ame: full=atp-dependent rrna helicase rrp…	PF00270=>DEAD/DEAH box helicase;PF00271=>Helicase conserved C-terminal domain;	IPR001650 (Helicase, C-terminal; IPR014014 (RNA helicase, DEAD-box type, Q motif; IPR014021 (Helicase, superfamily 1/2, ATP-binding domain)
RirG017820	5236	5236_1
RirG017830	1	1_74
RirG017840	521	521_1		PF00505=>HMG (high mobility group) box;	IPR009071 (High mobility group, superfamily)
RirG017850	6	6_2		PF00651=>BTB/POZ domain;PF07534=>TLD;PF07707=>BTB And C-terminal Kelch;	IPR011333 (BTB/POZ fold; IPR013089 (Kelch-related)
RirG017860	6	6_2		PF00651=>BTB/POZ domain;PF07534=>TLD;PF07707=>BTB And C-terminal Kelch;	IPR011333 (BTB/POZ fold; IPR013089 (Kelch-related)
RirG017870	288	288_2
RirG017880	1029	1029_1	GO:0016787=>hydrolase activity=>nm111_cocim ame: full=pro-apoptotic serine protease nma111);		IPR001478 (PDZ/DHR/GLGF; IPR009003 (Peptidase cysteine/serine, trypsin-like)
RirG017890
RirG017900	1027	1027_1	GO:0000087=>M phase of mitotic cell cycle=>kif4_dicdi ame: full=kinesin-related protein 4 ame: full=kinesin family member 4 ame: full=kinesin-7;GO:0000775=>chromosome, centromeric region=>kif4_dicdi ame: full=kinesin-related protein 4 ame: full=kinesin family member 4 ame: full=kinesin-7;GO:0005515=>protein binding=>kif4_dicdi ame: full=kinesin-related protein 4 ame: full=kinesin family member 4 …	PF00225=>Kinesin motor domain;	IPR001752 (Kinesin, motor domain)
RirG017910	2476	2476_1
RirG017920	11219	11219_1
RirG017930	5823	5823_1
RirG017940	965	965_1		PF04548=>AIG1 family;	IPR006703 (AIG1)
RirG017950
RirG017960	965	965_1		PF04548=>AIG1 family;	IPR006703 (AIG1)
RirG017970	965	965_1		PF04548=>AIG1 family;	IPR006703 (AIG1)
RirG017980	56	56_1	GO:0005737=>cytoplasm=>enc2_xenla ame: full=ectoderm-neural cortex protein 2 ame: full=kelch-like protein 25;GO:0009987=>cellular process=>enc2_xenla ame: full=ectoderm-neural cortex protein 2 ame: full=kelch-like protein 25;GO:0043232=>intracellular non-membrane-bounded organelle=>enc2_xenla ame: full=ectoderm-neural cortex protein 2 ame: full=kelch-like protein 25);	PF00651=>BTB/POZ domain;PF07534=>TLD;PF07707=>BTB And C-terminal Kelch;	IPR011333 (BTB/POZ fold; IPR013089 (Kelch-related)
RirG017990	747	747_1
RirG018000	747	747_1
RirG018010	5820	5820_1		PF10276=>Zinc-finger domain;	IPR019401 (Zinc finger, CHCC-type)
RirG018020	22	22_1	GO:0000166=>nucleotide binding=>y9963_dicdi ame: full=probable serine threonine-protein kinase ddb_g0272254;GO:0000187=>activation of MAPK activity=>y9963_dicdi ame: full=probable serine threonine-protein kinase ddb_g0272254;GO:0001819=>positive regulation of cytokine production=>y9963_dicdi ame: full=probable serine threonine-protein kinase ddb_g0272254;GO:0002224=>toll-like receptor signaling p…	PF07714=>Protein tyrosine kinase;	IPR011009 (Protein kinase-like domain)
RirG018030	5248	5248_1
RirG018040	5524	5524_1
RirG018050	836	836_1	GO:0004872=>receptor activity=>adrl_drome ame: full=adipor-like receptor cg5315;GO:0005515=>protein binding=>adrl_drome ame: full=adipor-like receptor cg5315;GO:0005886=>plasma membrane=>adrl_drome ame: full=adipor-like receptor cg5315;GO:0006631=>fatty acid metabolic process=>adrl_drome ame: full=adipor-like receptor cg5315;GO:0007165=>signal transduction=>adrl_drome ame: full=adipor-like recept…	PF03006=>Haemolysin-III related;	IPR004254 (Hly-III-related)
RirG018060
RirG018070	5109	5109_1		PF01239=>Protein prenyltransferase alpha subunit repeat;	IPR000488 (Death; IPR008940 (Protein prenyltransferase)
RirG018080	3299	3299_1	GO:0006810=>transport=>nipa3_ponab ame: full=magnesium transporter nipa3 ame: full=nipa-like protein 1 ame: full=non-imprinted in prader-willi angelman syndrome region protein 3 homolog);	PF05653=>Magnesium transporter NIPA;	IPR008521 (Protein of unknown function DUF803)
RirG018090	4809	4809_1		PF08790=>LYAR-type C2HC zinc finger ;	IPR014898 (Zinc finger, C2H2, LYAR-type)
RirG018100	4258	4258_1
RirG018110	11878	11878_1	GO:0005515=>protein binding=>kxdl1_drome ame: full= motif-containing protein cg10681);	PF10241=>Uncharacterized conserved protein;	IPR019371 (Uncharacterised protein domain KxDL)
RirG018120	1979	1979_1	GO:0001541=>ovarian follicle development=>ei2bb_schpo ame: full=probable translation initiation factor eif-2b subunit beta ame: full=eif-2b gdp-gtp exchange factor subunit beta;GO:0003743=>translation initiation factor activity=>ei2bb_schpo ame: full=probable translation initiation factor eif-2b subunit beta ame: full=eif-2b gdp-gtp exchange factor subunit beta;GO:0005085=>guanyl-nucleotide excha…	PF01008=>Initiation factor 2 subunit family;	IPR000649 (Initiation factor 2B-related)
RirG018130				PF11654=>Protein of unknown function (DUF2665);
RirG018140	102	102_1	GO:0000166=>nucleotide binding=>dhx15_schpo ame: full=probable pre-mrna-splicing factor atp-dependent rna helicase prp43;GO:0000398=>mRNA splicing, via spliceosome=>dhx15_schpo ame: full=probable pre-mrna-splicing factor atp-dependent rna helicase prp43;GO:0002009=>morphogenesis of an epithelium=>dhx15_schpo ame: full=probable pre-mrna-splicing factor atp-dependent rna helicase prp43;GO:0002119=>…	PF00270=>DEAD/DEAH box helicase;PF00271=>Helicase conserved C-terminal domain;PF04408=>Helicase associated domain (HA2);PF07717=>Oligonucleotide/oligosaccharide-binding (OB)-fold;	IPR001650 (Helicase, C-terminal; IPR007502 (Helicase-associated domain; IPR011709 (Domain of unknown function DUF1605; IPR014021 (Helicase, superfamily 1/2, ATP-binding domain)
RirG018150	2280	2280_1	GO:0005488=>binding=>sf3a1_bovin ame: full=splicing factor 3a subunit 1;GO:0005681=>spliceosomal complex=>sf3a1_bovin ame: full=splicing factor 3a subunit 1;GO:0006351=>transcription, DNA-dependent=>sf3a1_bovin ame: full=splicing factor 3a subunit 1;GO:0006376=>mRNA splice site selection=>sf3a1_bovin ame: full=splicing factor 3a subunit 1;GO:0048025=>negative regulation of mRNA splicing, via spli…	PF00240=>Ubiquitin family;PF01805=>Surp module;PF12230=>Pre-mRNA splicing factor PRP21 like protein;	IPR000061 (SWAP/Surp; IPR019955 (Ubiquitin supergroup; IPR022030 (Pre-mRNA splicing factor PRP21-like protein)
RirG018160	189	189_1
RirG018170	2891	2891_1
RirG018180	7	7_4	GO:0000186=>activation of MAPKK activity=>y9963_dicdi ame: full=probable serine threonine-protein kinase ddb_g0272254;GO:0001819=>positive regulation of cytokine production=>y9963_dicdi ame: full=probable serine threonine-protein kinase ddb_g0272254;GO:0002224=>toll-like receptor signaling pathway=>y9963_dicdi ame: full=probable serine threonine-protein kinase ddb_g0272254;GO:0004709=>MAP kinase …	PF07714=>Protein tyrosine kinase;	IPR011009 (Protein kinase-like domain)
RirG018190	11	11_11	GO:0002009=>morphogenesis of an epithelium=>m3k7_rat ame: full=mitogen-activated protein kinase kinase kinase 7;GO:0002224=>toll-like receptor signaling pathway=>m3k7_rat ame: full=mitogen-activated protein kinase kinase kinase 7;GO:0002252=>immune effector process=>m3k7_rat ame: full=mitogen-activated protein kinase kinase kinase 7;GO:0004674=>protein serine/threonine kinase activity=>m3k7_rat a…	PF00069=>Protein kinase domain;	IPR011009 (Protein kinase-like domain)
RirG018200	11	11_3	GO:0009987=>cellular process=>yr818_mimiv ame: full= serine threonine-protein kinase receptor r818 flags: precursor;GO:0016772=>transferase activity, transferring phosphorus-containing groups=>yr818_mimiv ame: full= serine threonine-protein kinase receptor r818 flags: precursor);	PF07714=>Protein tyrosine kinase;	IPR011009 (Protein kinase-like domain)
RirG018210
RirG018220	6570	6570_1
RirG018230	459	459_1	GO:0005743=>mitochondrial inner membrane=>mcat_mouse ame: full=mitochondrial carnitine acylcarnitine carrier protein ame: full=carnitine acylcarnitine translocase short=cac short=mcac ame: full=solute carrier family 25 member 20;GO:0006853=>carnitine shuttle=>mcat_mouse ame: full=mitochondrial carnitine acylcarnitine carrier protein ame: full=carnitine acylcarnitine translocase short=cac short=mc…	PF00153=>Mitochondrial carrier protein;	IPR001993 (Mitochondrial substrate carrier)
RirG018240	5820	5820_1
RirG018250	5820	5820_1		PF00505=>HMG (high mobility group) box;PF07714=>Protein tyrosine kinase;	IPR009071 (High mobility group, superfamily; IPR011009 (Protein kinase-like domain)
RirG018260
RirG018270	2887	2887_1	GO:0005515=>protein binding=>y1773_syny3 ame: full= quercetin -dioxygenase sll1773 short= quercetinase ame: full=pirin-like protein sll1773;GO:0005737=>cytoplasm=>y1773_syny3 ame: full= quercetin -dioxygenase sll1773 short= quercetinase ame: full=pirin-like protein sll1773;GO:0006826=>iron ion transport=>y1773_syny3 ame: full= quercetin -dioxygenase sll1773 short= quercetinase ame: full=pirin-lik…	PF02678=>Pirin;	IPR012093 (Pirin)
RirG018280	11168	11168_1		PF07534=>TLD;
RirG018290	11168	11168_1		PF07534=>TLD;
RirG018300	1627	1627_1
RirG018310	1627	1627_1
RirG018320	2907	2907_1		PF02221=>ML domain;	IPR003172 (MD-2-related lipid-recognition)
RirG018330	15080	15080_1		PF08238=>Sel1 repeat;	IPR011990 (Tetratricopeptide-like helical)
RirG018340	14	14_7	GO:0001501=>skeletal system development=>yr826_mimiv ame: full= serine threonine-protein kinase receptor r826 flags: precursor;GO:0004674=>protein serine/threonine kinase activity=>yr826_mimiv ame: full= serine threonine-protein kinase receptor r826 flags: precursor;GO:0004714=>transmembrane receptor protein tyrosine kinase activity=>yr826_mimiv ame: full= serine threonine-protein kinase receptor…	PF07714=>Protein tyrosine kinase;	IPR011009 (Protein kinase-like domain)
RirG018350	35	35_5
RirG018360	1758	1758_1	GO:0000022=>mitotic spindle elongation=>psa2_neucr ame: full=probable proteasome subunit alpha type-2;GO:0000084=>S phase of mitotic cell cycle=>psa2_neucr ame: full=probable proteasome subunit alpha type-2;GO:0000166=>nucleotide binding=>psa2_neucr ame: full=probable proteasome subunit alpha type-2;GO:0000209=>protein polyubiquitination=>psa2_neucr ame: full=probable proteasome subunit alpha typ…	PF00227=>Proteasome subunit;PF10584=>Proteasome subunit A N-terminal signature;	IPR000426 (Proteasome, alpha-subunit, conserved site; IPR001353 (Proteasome, subunit alpha/beta)
RirG018370	186	186_1	GO:0070011=>peptidase activity, acting on L-amino acid peptides=>ampp1_lacbs ame: full=probable xaa-pro aminopeptidase p short=ampp short=aminopeptidase p ame: full=aminoacylproline aminopeptidase ame: full=prolidase);	PF00557=>Metallopeptidase family M24;PF01321=>Creatinase/Prolidase N-terminal domain;	IPR000587 (Creatinase; IPR000994 (Peptidase M24, structural domain)
RirG018380	2196	2196_1	GO:0000790=>nuclear chromatin=>cwc22_aspfu ame: full=pre-mrna-splicing factor cwc22;GO:0002119=>nematode larval development=>cwc22_aspfu ame: full=pre-mrna-splicing factor cwc22;GO:0003723=>RNA binding=>cwc22_aspfu ame: full=pre-mrna-splicing factor cwc22;GO:0005654=>nucleoplasm=>cwc22_aspfu ame: full=pre-mrna-splicing factor cwc22;GO:0005730=>nucleolus=>cwc22_aspfu ame: full=pre-mrna-splicing fa…	PF02847=>MA3 domain;PF02854=>MIF4G domain;	IPR003891 (Initiation factor eIF-4 gamma, MA3; IPR016024 (Armadillo-type fold)
RirG018390
RirG018400
RirG018410	2795	2795_1	GO:0000022=>mitotic spindle elongation=>psb4_bovin ame: full=proteasome subunit beta type-4 flags: precursor;GO:0000084=>S phase of mitotic cell cycle=>psb4_bovin ame: full=proteasome subunit beta type-4 flags: precursor;GO:0000209=>protein polyubiquitination=>psb4_bovin ame: full=proteasome subunit beta type-4 flags: precursor;GO:0000216=>M/G1 transition of mitotic cell cycle=>psb4_bovin ame: fu…	PF00227=>Proteasome subunit;	IPR001353 (Proteasome, subunit alpha/beta)
RirG018420	281	281_1	GO:0000022=>mitotic spindle elongation=>rl18b_schpo ame: full=60s ribosomal protein l18-b;GO:0000184=>nuclear-transcribed mRNA catabolic process, nonsense-mediated decay=>rl18b_schpo ame: full=60s ribosomal protein l18-b;GO:0003723=>RNA binding=>rl18b_schpo ame: full=60s ribosomal protein l18-b;GO:0003735=>structural constituent of ribosome=>rl18b_schpo ame: full=60s ribosomal protein l18-b;GO:00…	PF00828=>Ribosomal protein L18e/L15;	IPR021131 (Ribosomal protein L18e/L15)
RirG018430	4183	4183_1
RirG018440	611	611_1	GO:0000152=>nuclear ubiquitin ligase complex=>aapk2_ponab ame: full=5 -amp-activated protein kinase catalytic subunit alpha-2 short=ampk subunit alpha-2 ame: full=acetyl- carboxylase kinase short=acaca kinase ame: full=hydroxymethylglutaryl- reductase kinase short=hmgcr kinase;GO:0003006=>developmental process involved in reproduction=>aapk2_ponab ame: full=5 -amp-activated protein kinase catalyt…	PF00069=>Protein kinase domain;PF08587=>Ubiquitin associated domain (UBA) ;	IPR015940 (Ubiquitin-associated/translation elongation factor EF1B, N-terminal, eukaryote; IPR020636 (Calcium/calmodulin-dependent protein kinase-like)
RirG018450	7811	7811_1	GO:0005739=>mitochondrion=>alkb7_mouse ame: full=probable alpha-ketoglutarate-dependent dioxygenase abh7 ame: full=alkylated dna repair protein alkb homolog 7 flags: precursor;GO:0016706=>oxidoreductase activity, acting on paired donors, with incorporation or reduction of molecular oxygen, 2-oxoglutarate as one donor, and incorporation of one atom each of oxygen into both donors=>alkb7_mouse ame:…
RirG018460	2154	2154_1	GO:0003723=>RNA binding=>laa_xenla ame: full=lupus la protein homolog a ame: full=la autoantigen homolog a ame: full=la ribonucleoprotein a;GO:0005737=>cytoplasm=>laa_xenla ame: full=lupus la protein homolog a ame: full=la autoantigen homolog a ame: full=la ribonucleoprotein a;GO:0006396=>RNA processing=>laa_xenla ame: full=lupus la protein homolog a ame: full=la autoantigen homolog a ame: full=l…	PF05383=>La domain;PF08777=>RNA binding motif;	IPR002344 (Lupus La protein; IPR011991 (Winged helix-turn-helix transcription repressor DNA-binding; IPR012677 (Nucleotide-binding, alpha-beta plait)
RirG018470	11968	11968_1		PF09421=>Frequency clock protein;	IPR011991 (Winged helix-turn-helix transcription repressor DNA-binding; IPR018554 (Frequency clock protein)
RirG018480	82	82_1	GO:0001937=>negative regulation of endothelial cell proliferation=>ptn1_chick ame: full=tyrosine-protein phosphatase non-receptor type 1 ame: full=cptp1 ame: full=protein-tyrosine phosphatase 1b short=ptp-1b;GO:0001959=>regulation of cytokine-mediated signaling pathway=>ptn1_chick ame: full=tyrosine-protein phosphatase non-receptor type 1 ame: full=cptp1 ame: full=protein-tyrosine phosphatase 1b …	PF00102=>Protein-tyrosine phosphatase;	IPR000242 (Protein-tyrosine phosphatase, receptor/non-receptor type)
RirG018490					IPR009057 (Homeodomain-like)
RirG018500	3642	3642_1	GO:0005739=>mitochondrion=>s2540_xentr ame: full=solute carrier family 25 member 40;GO:0006783=>heme biosynthetic process=>s2540_xentr ame: full=solute carrier family 25 member 40);	PF00153=>Mitochondrial carrier protein;	IPR001993 (Mitochondrial substrate carrier)
RirG018510	1041	1041_1	GO:0000398=>mRNA splicing, via spliceosome=>lsm3_dicdi ame: full=probable u6 snrna-associated sm-like protein lsm3;GO:0005515=>protein binding=>lsm3_dicdi ame: full=probable u6 snrna-associated sm-like protein lsm3;GO:0005829=>cytosol=>lsm3_dicdi ame: full=probable u6 snrna-associated sm-like protein lsm3;GO:0043928=>exonucleolytic nuclear-transcribed mRNA catabolic process involved in deadenylat…	PF01423=>LSM domain ;	IPR010920 (Like-Sm ribonucleoprotein (LSM)-related domain)
RirG018520	3427	3427_1	GO:0000307=>cyclin-dependent protein kinase holoenzyme complex=>pho85_yarli ame: full=negative regulator of the pho system ame: full=serine threonine-protein kinase pho85;GO:0000781=>chromosome, telomeric region=>pho85_yarli ame: full=negative regulator of the pho system ame: full=serine threonine-protein kinase pho85;GO:0000793=>condensed chromosome=>pho85_yarli ame: full=negative regulator of t…	PF00069=>Protein kinase domain;	IPR011009 (Protein kinase-like domain)
RirG018530	2442	2442_1	GO:0003723=>RNA binding=>has1_schpo ame: full=atp-dependent rna helicase has1;GO:0004004=>ATP-dependent RNA helicase activity=>has1_schpo ame: full=atp-dependent rna helicase has1;GO:0005524=>ATP binding=>has1_schpo ame: full=atp-dependent rna helicase has1;GO:0005730=>nucleolus=>has1_schpo ame: full=atp-dependent rna helicase has1;GO:0006364=>rRNA processing=>has1_schpo ame: full=atp-dependent r…	PF00270=>DEAD/DEAH box helicase;PF00271=>Helicase conserved C-terminal domain;	IPR001650 (Helicase, C-terminal; IPR014014 (RNA helicase, DEAD-box type, Q motif; IPR014021 (Helicase, superfamily 1/2, ATP-binding domain)
RirG018540	10141	10141_1	GO:0005737=>cytoplasm=>ce120_human ame: full=centrosomal protein of 120 kda short=cep120 ame: full=coiled-coil domain-containing protein 100;GO:0005856=>cytoskeleton=>ce120_human ame: full=centrosomal protein of 120 kda short=cep120 ame: full=coiled-coil domain-containing protein 100;GO:0007017=>microtubule-based process=>ce120_human ame: full=centrosomal protein of 120 kda short=cep120 ame: full…	PF12416=>Cep120 protein;	IPR008973 (C2 calcium/lipid-binding domain, CaLB; IPR022136 (Protein of unknown function DUF3668)
RirG018550	1646	1646_1	GO:0005515=>protein binding=>dhdds_human ame: full=dehydrodolichyl diphosphate synthase short=dedol-pp synthase ame: full=cis-isoprenyltransferase short=cit short=cis-iptase ame: full=epididymis tissue protein li 189m;GO:0009987=>cellular process=>dhdds_human ame: full=dehydrodolichyl diphosphate synthase short=dedol-pp synthase ame: full=cis-isoprenyltransferase short=cit short=cis-iptase ame: f…	PF01255=>Putative undecaprenyl diphosphate synthase;	IPR001441 (Di-trans-poly-cis-decaprenylcistransferase-like)
RirG018560	1258	1258_1	GO:0005515=>protein binding=>ari1_human ame: full=e3 ubiquitin-protein ligase arih1 ame: full=h7-ap2 ame: full=hhari ame: full=monocyte protein 6 short=mop-6 ame: full=protein ariadne-1 homolog short=ari-1 ame: full= 7-binding protein ame: full= 4-interacting protein ame: full=ubiquitin-conjugating enzyme e2-binding protein 1;GO:0005737=>cytoplasm=>ari1_human ame: full=e3 ubiquitin-protein ligase…	PF01485=>IBR domain;	IPR001841 (Zinc finger, RING-type; IPR002867 (Zinc finger, C6HC-type)
RirG018570
RirG018580
RirG018590	317	317_1			IPR001660 (Sterile alpha motif domain)
RirG018600	6896	6896_1
RirG018610	1308	1308_1	GO:0005634=>nucleus=>pr38a_human ame: full=pre-mrna-splicing factor 38a;GO:0006396=>RNA processing=>pr38a_human ame: full=pre-mrna-splicing factor 38a);	PF03371=>PRP38 family;	IPR005037 (PRP38)
RirG018620	94	94_1	GO:0000003=>reproduction=>y9955_dicdi ame: full=probable serine threonine-protein kinase ddb_g0267514;GO:0002009=>morphogenesis of an epithelium=>y9955_dicdi ame: full=probable serine threonine-protein kinase ddb_g0267514;GO:0002224=>toll-like receptor signaling pathway=>y9955_dicdi ame: full=probable serine threonine-protein kinase ddb_g0267514;GO:0002252=>immune effector process=>y9955_dicdi am…	PF00069=>Protein kinase domain;	IPR011009 (Protein kinase-like domain)
RirG018630	42	42_1	GO:0004672=>protein kinase activity=>phg2_dicdi ame: full=serine threonine-protein kinase phg2;GO:0005488=>binding=>phg2_dicdi ame: full=serine threonine-protein kinase phg2;GO:0044237=>cellular metabolic process=>phg2_dicdi ame: full=serine threonine-protein kinase phg2;GO:0050794=>regulation of cellular process=>phg2_dicdi ame: full=serine threonine-protein kinase phg2;GO:0050896=>response to s…	PF07714=>Protein tyrosine kinase;	IPR011009 (Protein kinase-like domain)
RirG018640	42	42_6	GO:0016740=>transferase activity=>y9844_dicdi ame: full=probable serine threonine-protein kinase ddb_g0282963);	PF00069=>Protein kinase domain;	IPR011009 (Protein kinase-like domain)
RirG018650	1275	1275_1
RirG018660	8924	8924_1
RirG018670
RirG018680	1127	1127_1	GO:0001822=>kidney development=>dcor_schpo ame: full=ornithine decarboxylase short=odc;GO:0004586=>ornithine decarboxylase activity=>dcor_schpo ame: full=ornithine decarboxylase short=odc;GO:0004857=>enzyme inhibitor activity=>dcor_schpo ame: full=ornithine decarboxylase short=odc;GO:0005829=>cytosol=>dcor_schpo ame: full=ornithine decarboxylase short=odc;GO:0006521=>regulation of cellular amino …	PF00278=>Pyridoxal-dependent decarboxylase;C-terminal sheet domain;PF02784=>Pyridoxal-dependent decarboxylase;pyridoxal binding domain;	IPR000183 (Ornithine/DAP/Arg decarboxylase)
RirG018690	32	32_3
RirG018700	4918	4918_1
RirG018710	765	765_1	GO:0000387=>spliceosomal snRNP assembly=>anm5_orysj ame: full=protein arginine n-methyltransferase 5 ame: full=shk1 kinase-binding protein 1 homolog;GO:0005515=>protein binding=>anm5_orysj ame: full=protein arginine n-methyltransferase 5 ame: full=shk1 kinase-binding protein 1 homolog;GO:0005634=>nucleus=>anm5_orysj ame: full=protein arginine n-methyltransferase 5 ame: full=shk1 kinase-binding pr…	PF05185=>PRMT5 arginine-N-methyltransferase;	IPR007857 (Skb1 methyltransferase)
RirG018720				PF02469=>Fasciclin domain;	IPR000782 (FAS1 domain)
RirG018730					IPR020683 (Ankyrin repeat-containing domain)
RirG018740	190	190_1
RirG018750	1413	1413_1
RirG018760	63	63_1
RirG018770
RirG018780
RirG018790	595	595_1	GO:0005515=>protein binding=>vcx1_yeast ame: full=vacuolar calcium ion transporter ame: full=high copy number undoes manganese protein 1 ame: full=manganese resistance 1 protein ame: full=vacuolar ca(2+) h(+) exchanger;GO:0006793=>phosphorus metabolic process=>vcx1_yeast ame: full=vacuolar calcium ion transporter ame: full=high copy number undoes manganese protein 1 ame: full=manganese resistance…	PF01699=>Sodium/calcium exchanger protein;	IPR004798 (Calcium/proton exchanger superfamily)
RirG018800	595	595_1	GO:0005774=>vacuolar membrane=>vcx1_schpo ame: full=vacuolar calcium ion transporter ame: full=vacuolar ca(2+) h(+) exchanger;GO:0015368=>calcium:cation antiporter activity=>vcx1_schpo ame: full=vacuolar calcium ion transporter ame: full=vacuolar ca(2+) h(+) exchanger;GO:0015672=>monovalent inorganic cation transport=>vcx1_schpo ame: full=vacuolar calcium ion transporter ame: full=vacuolar ca(2+)…	PF01699=>Sodium/calcium exchanger protein;	IPR004798 (Calcium/proton exchanger superfamily)
RirG018810	595	595_1	GO:0005773=>vacuole=>vcx1_schpo ame: full=vacuolar calcium ion transporter ame: full=vacuolar ca(2+) h(+) exchanger;GO:0006812=>cation transport=>vcx1_schpo ame: full=vacuolar calcium ion transporter ame: full=vacuolar ca(2+) h(+) exchanger;GO:0015491=>cation:cation antiporter activity=>vcx1_schpo ame: full=vacuolar calcium ion transporter ame: full=vacuolar ca(2+) h(+) exchanger;GO:0016020=>memb…	PF01699=>Sodium/calcium exchanger protein;	IPR004798 (Calcium/proton exchanger superfamily)
RirG018820	595	595_1	GO:0005774=>vacuolar membrane=>vcx1_yeast ame: full=vacuolar calcium ion transporter ame: full=high copy number undoes manganese protein 1 ame: full=manganese resistance 1 protein ame: full=vacuolar ca(2+) h(+) exchanger;GO:0015368=>calcium:cation antiporter activity=>vcx1_yeast ame: full=vacuolar calcium ion transporter ame: full=high copy number undoes manganese protein 1 ame: full=manganese re…	PF01699=>Sodium/calcium exchanger protein;	IPR004798 (Calcium/proton exchanger superfamily)
RirG018830	595	595_1	GO:0005774=>vacuolar membrane=>vcx1_yeast ame: full=vacuolar calcium ion transporter ame: full=high copy number undoes manganese protein 1 ame: full=manganese resistance 1 protein ame: full=vacuolar ca(2+) h(+) exchanger;GO:0015368=>calcium:cation antiporter activity=>vcx1_yeast ame: full=vacuolar calcium ion transporter ame: full=high copy number undoes manganese protein 1 ame: full=manganese re…	PF01699=>Sodium/calcium exchanger protein;	IPR004798 (Calcium/proton exchanger superfamily)
RirG018840	7	7_10
RirG018850
RirG018860	2851	2851_1
RirG018870	4201	4201_1		PF00627=>UBA/TS-N domain;PF01694=>Rhomboid family;	IPR009060 (UBA-like; IPR022764 (Peptidase S54, rhomboid domain)
RirG018880	275	275_3	GO:0000122=>negative regulation of transcription from RNA polymerase II promoter=>mybl_dicdi ame: full=myb-like protein l;GO:0003713=>transcription coactivator activity=>mybl_dicdi ame: full=myb-like protein l;GO:0005515=>protein binding=>mybl_dicdi ame: full=myb-like protein l;GO:0006338=>chromatin remodeling=>mybl_dicdi ame: full=myb-like protein l;GO:0009301=>snRNA transcription=>mybl_dicdi am…	PF00249=>Myb-like DNA-binding domain;	IPR009057 (Homeodomain-like; IPR015495 (Myb transcription factor)
RirG018890	4015	4015_1	GO:0000122=>negative regulation of transcription from RNA polymerase II promoter=>mpc2_mouse ame: full=mitochondrial pyruvate carrier 2 ame: full=brain protein 44;GO:0003682=>chromatin binding=>mpc2_mouse ame: full=mitochondrial pyruvate carrier 2 ame: full=brain protein 44;GO:0003727=>single-stranded RNA binding=>mpc2_mouse ame: full=mitochondrial pyruvate carrier 2 ame: full=brain protein 44;GO…	PF03650=>Uncharacterised protein family (UPF0041);	IPR005336 (Uncharacterised protein family UPF0041)
RirG018900	7311	7311_1			IPR022364 (F-box domain, Skp2-like)
RirG018910
RirG018920	989	989_1	GO:0005737=>cytoplasm=>sui1_schpo ame: full=protein translation factor sui1;GO:0006446=>regulation of translational initiation=>sui1_schpo ame: full=protein translation factor sui1;GO:0008135=>translation factor activity, nucleic acid binding=>sui1_schpo ame: full=protein translation factor sui1;GO:0071456=>cellular response to hypoxia=>sui1_schpo ame: full=protein translation factor sui1);	PF01253=>Translation initiation factor SUI1;	IPR005874 (Eukaryotic translation initiation factor SUI1)
RirG018930	424	424_1	GO:0006811=>ion transport=>avt3_schpo ame: full=vacuolar amino acid transporter 3;GO:0015175=>neutral amino acid transmembrane transporter activity=>avt3_schpo ame: full=vacuolar amino acid transporter 3;GO:0015179=>L-amino acid transmembrane transporter activity=>avt3_schpo ame: full=vacuolar amino acid transporter 3;GO:0015291=>secondary active transmembrane transporter activity=>avt3_schpo ame…	PF01490=>Transmembrane amino acid transporter protein;	IPR013057 (Amino acid transporter, transmembrane)
RirG018940	9810	9810_1	GO:0003676=>nucleic acid binding=>mtl14_chick ame: full=methyltransferase-like protein 14;GO:0005634=>nucleus=>mtl14_chick ame: full=methyltransferase-like protein 14;GO:0005829=>cytosol=>mtl14_chick ame: full=methyltransferase-like protein 14;GO:0006139=>nucleobase-containing compound metabolic process=>mtl14_chick ame: full=methyltransferase-like protein 14;GO:0008757=>S-adenosylmethionine-depe…	PF05063=>MT-A70 ;	IPR007757 (MT-A70)
RirG018950			GO:0005681=>spliceosomal complex=>wdr25_mouse ame: full=wd repeat-containing protein 25;GO:0006351=>transcription, DNA-dependent=>wdr25_mouse ame: full=wd repeat-containing protein 25;GO:0006397=>mRNA processing=>wdr25_mouse ame: full=wd repeat-containing protein 25;GO:0007049=>cell cycle=>wdr25_mouse ame: full=wd repeat-containing protein 25;GO:0010485=>H4 histone acetyltransferase activity=>wdr…	PF00400=>WD domain;G-beta repeat;PF08662=>Eukaryotic translation initiation factor eIF2A;	IPR015943 (WD40/YVTN repeat-like-containing domain)
RirG018960	3396	3396_1		PF04791=>LMBR1-like membrane protein;	IPR006876 (LMBR1-like membrane protein)
RirG018970	4372	4372_1
RirG018980	69	69_1	GO:0004497=>monooxygenase activity=>c4d10_dromt ame: full=cytochrome p450 4d10 ame: full=cypivd10;GO:0005488=>binding=>c4d10_dromt ame: full=cytochrome p450 4d10 ame: full=cypivd10;GO:0005811=>lipid particle=>c4d10_dromt ame: full=cytochrome p450 4d10 ame: full=cypivd10;GO:0006629=>lipid metabolic process=>c4d10_dromt ame: full=cytochrome p450 4d10 ame: full=cypivd10;GO:0016020=>membrane=>c4d10_d…	PF00067=>Cytochrome P450;	IPR001128 (Cytochrome P450)
RirG018990	69	69_2	GO:0005488=>binding=>cp3ao_sheep ame: full=cytochrome p450 3a24 ame: full=cypiiia24;GO:0005783=>endoplasmic reticulum=>cp3ao_sheep ame: full=cytochrome p450 3a24 ame: full=cypiiia24;GO:0008395=>steroid hydroxylase activity=>cp3ao_sheep ame: full=cytochrome p450 3a24 ame: full=cypiiia24;GO:0016020=>membrane=>cp3ao_sheep ame: full=cytochrome p450 3a24 ame: full=cypiiia24;GO:0016705=>oxidoreductase …	PF00067=>Cytochrome P450;	IPR001128 (Cytochrome P450)
RirG019000	179	179_2
RirG019010	179	179_1		PF01494=>FAD binding domain;	IPR003042 (Aromatic-ring hydroxylase-like)
RirG019020	179	179_1			IPR016040 (NAD(P)-binding domain)
RirG019030	106	106_2			IPR015495 (Myb transcription factor)
RirG019040	22	22_1	GO:0000166=>nucleotide binding=>pats1_dicdi ame: full=probable serine threonine-protein kinase pats1 ame: full=protein associated with the transduction of signal 1;GO:0000186=>activation of MAPKK activity=>pats1_dicdi ame: full=probable serine threonine-protein kinase pats1 ame: full=protein associated with the transduction of signal 1;GO:0001819=>positive regulation of cytokine production=>pats1…	PF07714=>Protein tyrosine kinase;	IPR011009 (Protein kinase-like domain)
RirG019050	4046	4046_1
RirG019060				PF10356=>Protein of unknown function (DUF2034);	IPR011856 (Endonuclease TnsA, N-terminal/resolvase Hjc/tRNA endonuclease, C-terminal; IPR018828 (Protein of unknown function DUF2034)
RirG019070	20	20_3
RirG019080	10106	10106_1	GO:0006810=>transport=>p2a03_arath ame: full= protein phloem protein 2-like a3 short= 2-a3;GO:0006950=>response to stress=>p2a03_arath ame: full= protein phloem protein 2-like a3 short= 2-a3;GO:0009987=>cellular process=>p2a03_arath ame: full= protein phloem protein 2-like a3 short= 2-a3);	PF04548=>AIG1 family;	IPR006703 (AIG1; IPR009053 (Prefoldin)
RirG019090	2106	2106_1		PF08238=>Sel1 repeat;	IPR011990 (Tetratricopeptide-like helical)
RirG019100	65	65_1		PF05970=>PIF1-like helicase;	IPR010285 (DNA helicase PIF1, ATP-dependent)
RirG019110					IPR023109 (Integrase/recombinase, N-terminal)
RirG019120	214	214_1
RirG019130	11	11_1	GO:0004672=>protein kinase activity=>zak1_dicdi ame: full=dual specificity protein kinase zaka ame: full=zaphod k kinase 1 short=zaphod kinase 1 ame: full=zaphod kinase a;GO:0005488=>binding=>zak1_dicdi ame: full=dual specificity protein kinase zaka ame: full=zaphod k kinase 1 short=zaphod kinase 1 ame: full=zaphod kinase a;GO:0009987=>cellular process=>zak1_dicdi ame: full=dual specificity prote…	PF00069=>Protein kinase domain;	IPR011009 (Protein kinase-like domain)
RirG019140	35	35_1
RirG019150	12845	12845_1	GO:0000122=>negative regulation of transcription from RNA polymerase II promoter=>ubc1_colgl ame: full=ubiquitin-conjugating enzyme e2-16 kda ame: full=colletotrichum hard-surface-induced protein 1 ame: full=ubiquitin carrier protein ame: full=ubiquitin-protein ligase;GO:0000166=>nucleotide binding=>ubc1_colgl ame: full=ubiquitin-conjugating enzyme e2-16 kda ame: full=colletotrichum hard-surface-…	PF00179=>Ubiquitin-conjugating enzyme;	IPR016135 (Ubiquitin-conjugating enzyme/RWD-like)
RirG019160	101	101_1	GO:0001525=>angiogenesis=>abl1_human ame: full=tyrosine-protein kinase abl1 ame: full=abelson murine leukemia viral oncogene homolog 1 ame: full=abelson tyrosine-protein kinase 1 ame: full=proto-oncogene c-abl ame: full=p150;GO:0001932=>regulation of protein phosphorylation=>abl1_human ame: full=tyrosine-protein kinase abl1 ame: full=abelson murine leukemia viral oncogene homolog 1 ame: full=abel…	PF04548=>AIG1 family;PF07714=>Protein tyrosine kinase;	IPR006703 (AIG1; IPR011009 (Protein kinase-like domain)
RirG019170	101	101_4
RirG019180	101	101_1	GO:0000166=>nucleotide binding=>ytyk2_dicdi ame: full=probable tyrosine-protein kinase ddb_g0283397;GO:0004713=>protein tyrosine kinase activity=>ytyk2_dicdi ame: full=probable tyrosine-protein kinase ddb_g0283397;GO:0005515=>protein binding=>ytyk2_dicdi ame: full=probable tyrosine-protein kinase ddb_g0283397;GO:0006468=>protein phosphorylation=>ytyk2_dicdi ame: full=probable tyrosine-protein kin…	PF04548=>AIG1 family;PF07714=>Protein tyrosine kinase;	IPR006703 (AIG1; IPR011009 (Protein kinase-like domain)
RirG019190	101	101_4
RirG019200				PF07500=>Transcription factor S-II (TFIIS);central domain;	IPR003618 (Transcription elongation factor S-II, central domain)
RirG019210
RirG019220	3297	3297_1
RirG019230	17258	17258_1	GO:0000139=>Golgi membrane=>fig4_yeast ame: full=polyphosphoinositide phosphatase ame: full=factor-induced gene 4 protein ame: full=phosphatidylinositol -bisphosphate 5-phosphatase;GO:0005515=>protein binding=>fig4_yeast ame: full=polyphosphoinositide phosphatase ame: full=factor-induced gene 4 protein ame: full=phosphatidylinositol -bisphosphate 5-phosphatase;GO:0007033=>vacuole organization=>fi…
RirG019240	155	155_1	GO:0009056=>catabolic process=>lip_rhimi ame: full=lipase ame: full=triacylglycerol lipase flags: precursor;GO:0043170=>macromolecule metabolic process=>lip_rhimi ame: full=lipase ame: full=triacylglycerol lipase flags: precursor;GO:0044238=>primary metabolic process=>lip_rhimi ame: full=lipase ame: full=triacylglycerol lipase flags: precursor;GO:0052689=>carboxylic ester hydrolase activity=>lip_…	PF01764=>Lipase (class 3);	IPR002921 (Lipase, class 3)
RirG019250	4141	4141_1		PF00018=>SH3 domain;PF03114=>BAR domain;	IPR001452 (Src homology-3 domain; IPR004148 (BAR)
RirG019260			GO:0005096=>GTPase activator activity=>hacd3_bovin ame: full=3-hydroxyacyl- dehydratase 3 short=hacd3 ame: full=protein tyrosine phosphatase-like protein ptplad1 ame: full=protein-tyrosine phosphatase-like a domain-containing protein 1;GO:0007257=>activation of JUN kinase activity=>hacd3_bovin ame: full=3-hydroxyacyl- dehydratase 3 short=hacd3 ame: full=protein tyrosine phosphatase-like protein p…	PF04969=>CS domain;	IPR008978 (HSP20-like chaperone)
RirG019270	18	18_7		PF07534=>TLD;	IPR006571 (TLDc)
RirG019280	35	35_4
RirG019290	2385	2385_1	GO:0000381=>regulation of alternative mRNA splicing, via spliceosome=>snrpa_bovin ame: full=u1 small nuclear ribonucleoprotein a short=u1 snrnp a short=u1-a short=u1a;GO:0005515=>protein binding=>snrpa_bovin ame: full=u1 small nuclear ribonucleoprotein a short=u1 snrnp a short=u1-a short=u1a;GO:0005685=>U1 snRNP=>snrpa_bovin ame: full=u1 small nuclear ribonucleoprotein a short=u1 snrnp a short=u1…	PF00076=>RNA recognition motif. (a.k.a. RRM;RBD, or RNP domain);	IPR012677 (Nucleotide-binding, alpha-beta plait)
RirG019300	4114	4114_1	GO:0005515=>protein binding=>srrm2_human ame: full=serine arginine repetitive matrix protein 2 ame: full=300 kda nuclear matrix antigen ame: full=serine arginine-rich splicing factor-related nuclear matrix protein of 300 kda short=sr-related nuclear matrix protein of 300 kda short=ser arg-related nuclear matrix protein of 300 kda ame: full=splicing coactivator subunit srm300 ame: full=tax-respons…	PF08312=>cwf21 domain;	IPR013170 (mRNA splicing factor, Cwf21)
RirG019310	91	91_5		PF03184=>DDE superfamily endonuclease;PF03221=>Tc5 transposase DNA-binding domain;	IPR004875 (DDE superfamily endonuclease, CENP-B-like; IPR009057 (Homeodomain-like)
RirG019320	671	671_1
RirG019330	3157	3157_1	GO:0005488=>binding=>tfp11_mouse ame: full=tuftelin-interacting protein 11 ame: full=septin and tuftelin-interacting protein 1 short=stip-1 ame: full=tuftelin-interacting protein 39;GO:0005681=>spliceosomal complex=>tfp11_mouse ame: full=tuftelin-interacting protein 11 ame: full=septin and tuftelin-interacting protein 1 short=stip-1 ame: full=tuftelin-interacting protein 39;GO:0006396=>RNA proces…	PF01585=>G-patch domain;PF07842=>GC-rich sequence DNA-binding factor-like protein;PF12457=>Tuftelin interacting protein N terminal ;	IPR000467 (D111/G-patch; IPR022159 (Tuftelin interacting protein N-terminal; IPR022783 (GC-rich sequence DNA-binding factor domain)
RirG019340	7943	7943_1		PF10615=>Protein of unknown function (DUF2470);	IPR009002 (FMN-binding split barrel-related; IPR019595 (Domain of unknown function DUF2470)
RirG019350	433	433_1	GO:0000287=>magnesium ion binding=>svka_dicdi ame: full=serine threonine-protein kinase svka ame: full=severin kinase a;GO:0001569=>patterning of blood vessels=>svka_dicdi ame: full=serine threonine-protein kinase svka ame: full=severin kinase a;GO:0001841=>neural tube formation=>svka_dicdi ame: full=serine threonine-protein kinase svka ame: full=severin kinase a;GO:0002011=>morphogenesis of an e…	PF00069=>Protein kinase domain;	IPR011009 (Protein kinase-like domain)
RirG019360	4804	4804_1	GO:0005856=>cytoskeleton=>yb83_schpo ame: full= domain-containing protein;GO:0016020=>membrane=>yb83_schpo ame: full= domain-containing protein;GO:0044446=>intracellular organelle part=>yb83_schpo ame: full= domain-containing protein;GO:0048821=>erythrocyte development=>yb83_schpo ame: full= domain-containing protein;GO:0071944=>cell periphery=>yb83_schpo ame: full= domain-containing protein);		IPR001841 (Zinc finger, RING-type; IPR006595 (CTLH, C-terminal LisH motif; IPR013083 (Zinc finger, RING/FYVE/PHD-type; IPR013144 (Ran binding protein-like, CRA domain)
RirG019370	6738	6738_1		PF01535=>PPR repeat;	IPR002885 (Pentatricopeptide repeat; IPR011990 (Tetratricopeptide-like helical)
RirG019380	17248	17248_1		PF05203=>Hom_end-associated Hint;	IPR007868 (Hom-end-associated Hint)
RirG019390	15049	15049_1		PF07714=>Protein tyrosine kinase;	IPR020685 (Tyrosine-protein kinase)
RirG019400	60	60_7		PF07714=>Protein tyrosine kinase;PF08238=>Sel1 repeat;	IPR011009 (Protein kinase-like domain; IPR011990 (Tetratricopeptide-like helical)
RirG019410	3142	3142_1	GO:0003723=>RNA binding=>wap53_human ame: full=telomerase cajal body protein 1 ame: full=wd repeat-containing protein 79 ame: full=wd40 repeat-containing protein encoding rna antisense to p53;GO:0005515=>protein binding=>wap53_human ame: full=telomerase cajal body protein 1 ame: full=wd repeat-containing protein 79 ame: full=wd40 repeat-containing protein encoding rna antisense to p53;GO:0005697=…	PF00400=>WD domain;G-beta repeat;	IPR015943 (WD40/YVTN repeat-like-containing domain)
RirG019420	1594	1594_1	GO:0000075=>cell cycle checkpoint=>ercc3_schpo ame: full=probable dna repair helicase ercc3;GO:0000441=>SSL2-core TFIIH complex=>ercc3_schpo ame: full=probable dna repair helicase ercc3;GO:0000717=>nucleotide-excision repair, DNA duplex unwinding=>ercc3_schpo ame: full=probable dna repair helicase ercc3;GO:0000718=>nucleotide-excision repair, DNA damage removal=>ercc3_schpo ame: full=probable dna…	PF00271=>Helicase conserved C-terminal domain;PF04851=>Type III restriction enzyme;res subunit;	IPR001161 (Xeroderma pigmentosum group B protein (XP-B); IPR001650 (Helicase, C-terminal; IPR006935 (Restriction endonuclease, type I, R subunit/Type III, Res subunit; IPR014021 (Helicase, superfamily 1/2, ATP-binding domain)
RirG019430	2364	2364_1	GO:0000122=>negative regulation of transcription from RNA polymerase II promoter=>brd1_human ame: full=bromodomain-containing protein 1 ame: full=br140-like protein ame: full=bromodomain and phd finger-containing protein 2;GO:0000792=>heterochromatin=>brd1_human ame: full=bromodomain-containing protein 1 ame: full=br140-like protein ame: full=bromodomain and phd finger-containing protein 2;GO:000…	PF00439=>Bromodomain;PF00628=>PHD-finger;PF10513=>Enhancer of polycomb-like;	IPR001487 (Bromodomain; IPR013083 (Zinc finger, RING/FYVE/PHD-type; IPR019542 (Enhancer of polycomb-like, N-terminal)
RirG019440	5828	5828_1
RirG019450	35	35_1
RirG019460	90	90_11
RirG019470	26	26_1
RirG019480	26	26_6
RirG019490	26	26_1
RirG019500
RirG019510	3779	3779_1		PF10348=>Domain of unknown function (DUF2427);PF10355=>Protein of unknown function (Ytp1);	IPR006593 (Cytochrome b561/ferric reductase transmembrane; IPR018825 (Domain of unknown function DUF2427; IPR018827 (Uncharacterised protein family YCR061W, C-terminal)
RirG019520	12814	12814_1	GO:0000981=>sequence-specific DNA binding RNA polymerase II transcription factor activity=>gata5_human ame: full=transcription factor gata-5 ame: full=gata-binding factor 5;GO:0001085=>RNA polymerase II transcription factor binding=>gata5_human ame: full=transcription factor gata-5 ame: full=gata-binding factor 5;GO:0002009=>morphogenesis of an epithelium=>gata5_human ame: full=transcription fact…	PF00320=>GATA zinc finger;	IPR013088 (Zinc finger, NHR/GATA-type)
RirG019530				PF00385=>Chromo (CHRromatin Organisation MOdifier) domain;	IPR016197 (Chromo domain-like)
RirG019540
RirG019550	9063	9063_1
RirG019560
RirG019570	14	14_1	GO:0004674=>protein serine/threonine kinase activity=>limkb_dicdi ame: full=probable lim domain-containing serine threonine-protein kinase ddb_g0286997;GO:0005886=>plasma membrane=>limkb_dicdi ame: full=probable lim domain-containing serine threonine-protein kinase ddb_g0286997;GO:0006468=>protein phosphorylation=>limkb_dicdi ame: full=probable lim domain-containing serine threonine-protein kinas…	PF07714=>Protein tyrosine kinase;PF08238=>Sel1 repeat;	IPR011009 (Protein kinase-like domain; IPR011990 (Tetratricopeptide-like helical)
RirG019580	8	8_5	GO:0005515=>protein binding=>ripk1_mouse ame: full=receptor-interacting serine threonine-protein kinase 1 ame: full=cell death protein rip ame: full=receptor-interacting protein 1 short=rip-1 ame: full=serine threonine-protein kinase rip;GO:0005737=>cytoplasm=>ripk1_mouse ame: full=receptor-interacting serine threonine-protein kinase 1 ame: full=cell death protein rip ame: full=receptor-interacti…	PF07714=>Protein tyrosine kinase;PF08238=>Sel1 repeat;	IPR011009 (Protein kinase-like domain; IPR011990 (Tetratricopeptide-like helical)
RirG019590	65	65_7
RirG019600	12847	12847_1	GO:0000122=>negative regulation of transcription from RNA polymerase II promoter=>ube2n_dicdi ame: full=probable ubiquitin-conjugating enzyme e2 n ame: full=ubiquitin carrier protein n ame: full=ubiquitin-protein ligase n;GO:0000151=>ubiquitin ligase complex=>ube2n_dicdi ame: full=probable ubiquitin-conjugating enzyme e2 n ame: full=ubiquitin carrier protein n ame: full=ubiquitin-protein ligase n…	PF00179=>Ubiquitin-conjugating enzyme;	IPR016135 (Ubiquitin-conjugating enzyme/RWD-like)
RirG019610	12847	12847_1	GO:0000122=>negative regulation of transcription from RNA polymerase II promoter=>ube2n_dicdi ame: full=probable ubiquitin-conjugating enzyme e2 n ame: full=ubiquitin carrier protein n ame: full=ubiquitin-protein ligase n;GO:0000151=>ubiquitin ligase complex=>ube2n_dicdi ame: full=probable ubiquitin-conjugating enzyme e2 n ame: full=ubiquitin carrier protein n ame: full=ubiquitin-protein ligase n…	PF00179=>Ubiquitin-conjugating enzyme;	IPR016135 (Ubiquitin-conjugating enzyme/RWD-like)
RirG019620	2006	2006_1	GO:0005622=>intracellular=>rm24_yeast ame: full=54s ribosomal protein mitochondrial ame: full= 14 24 flags: precursor);	PF00830=>Ribosomal L28 family;	IPR001383 (Ribosomal protein L28)
RirG019630	4104	4104_1	GO:0008654=>phospholipid biosynthetic process=>psd1_schpo ame: full=phosphatidylserine decarboxylase proenzyme mitochondrial contains: ame: full=phosphatidylserine decarboxylase 1 beta chain contains: ame: full=phosphatidylserine decarboxylase 1 alpha chain flags: precursor;GO:0043231=>intracellular membrane-bounded organelle=>psd1_schpo ame: full=phosphatidylserine decarboxylase proenzyme mitoch…	PF02666=>Phosphatidylserine decarboxylase;	IPR003817 (Phosphatidylserine decarboxylase-related)
RirG019640	1981	1981_1	GO:0003824=>catalytic activity=>qcr2_neucr ame: full=cytochrome b-c1 complex subunit mitochondrial ame: full=complex iii subunit 2 ame: full=core protein ii ame: full=ubiquinol-cytochrome-c reductase complex core protein 2 flags: precursor;GO:0005488=>binding=>qcr2_neucr ame: full=cytochrome b-c1 complex subunit mitochondrial ame: full=complex iii subunit 2 ame: full=core protein ii ame: full=ubi…	PF00675=>Insulinase (Peptidase family M16);PF05193=>Peptidase M16 inactive domain;	IPR011249 (Metalloenzyme, LuxS/M16 peptidase-like, metal-binding)
RirG019650	4949	4949_1		PF00443=>Ubiquitin carboxyl-terminal hydrolase;	IPR001394 (Peptidase C19, ubiquitin carboxyl-terminal hydrolase 2)
RirG019660	349	349_1	GO:0000085=>G2 phase of mitotic cell cycle=>clr6_schpo ame: full=histone deacetylase clr6 ame: full=cryptic loci regulator 6;GO:0000122=>negative regulation of transcription from RNA polymerase II promoter=>clr6_schpo ame: full=histone deacetylase clr6 ame: full=cryptic loci regulator 6;GO:0000792=>heterochromatin=>clr6_schpo ame: full=histone deacetylase clr6 ame: full=cryptic loci regulator 6;G…	PF00850=>Histone deacetylase domain;	IPR000286 (Histone deacetylase superfamily)
RirG019670	2710	2710_1	GO:0007275=>multicellular organismal development=>rrs1_human ame: full=ribosome biogenesis regulatory protein homolog;GO:0031981=>nuclear lumen=>rrs1_human ame: full=ribosome biogenesis regulatory protein homolog;GO:0043232=>intracellular non-membrane-bounded organelle=>rrs1_human ame: full=ribosome biogenesis regulatory protein homolog;GO:0048856=>anatomical structure development=>rrs1_human ame…	PF04939=>Ribosome biogenesis regulatory protein (RRS1);	IPR007023 (Ribosomal biogenesis regulatory protein)
RirG019680	17185	17185_1
RirG019690	11982	11982_1			IPR016024 (Armadillo-type fold)
RirG019700	4134	4134_1	GO:0005515=>protein binding=>spg1_schpo ame: full=septum-promoting gtp-binding protein 1 ame: full=gtpase spg1 ame: full=sid3 protein;GO:0005769=>early endosome=>spg1_schpo ame: full=septum-promoting gtp-binding protein 1 ame: full=gtpase spg1 ame: full=sid3 protein;GO:0005886=>plasma membrane=>spg1_schpo ame: full=septum-promoting gtp-binding protein 1 ame: full=gtpase spg1 ame: full=sid3 protei…	PF00071=>Ras family;	IPR005225 (Small GTP-binding protein)
RirG019710	41	41_9
RirG019720	41	41_1
RirG019730	41	41_16
RirG019740	10182	10182_1	GO:0005515=>protein binding=>ulp1_yeast ame: full=ubiquitin-like-specific protease 1;GO:0006464=>cellular protein modification process=>ulp1_yeast ame: full=ubiquitin-like-specific protease 1;GO:0006508=>proteolysis=>ulp1_yeast ame: full=ubiquitin-like-specific protease 1;GO:0006810=>transport=>ulp1_yeast ame: full=ubiquitin-like-specific protease 1;GO:0016020=>membrane=>ulp1_yeast ame: full=ubiq…	PF02902=>Ulp1 protease family;C-terminal catalytic domain;	IPR003653 (Peptidase C48, SUMO/Sentrin/Ubl1)
RirG019750	12820	12820_1
RirG019760	1861	1861_1	GO:0005634=>nucleus=>wdr3_human ame: full=wd repeat-containing protein 3);	PF00400=>WD domain;G-beta repeat;	IPR015943 (WD40/YVTN repeat-like-containing domain)
RirG019770	104	104_2	GO:0002224=>toll-like receptor signaling pathway=>y9963_dicdi ame: full=probable serine threonine-protein kinase ddb_g0272254;GO:0005003=>ephrin receptor activity=>y9963_dicdi ame: full=probable serine threonine-protein kinase ddb_g0272254;GO:0005488=>binding=>y9963_dicdi ame: full=probable serine threonine-protein kinase ddb_g0272254;GO:0006139=>nucleobase-containing compound metabolic process=>…	PF07714=>Protein tyrosine kinase;	IPR011009 (Protein kinase-like domain)
RirG019780	1856	1856_1			IPR012677 (Nucleotide-binding, alpha-beta plait)
RirG019790	1856	1856_1
RirG019800	3612	3612_1
RirG019810	29	29_17			IPR015943 (WD40/YVTN repeat-like-containing domain)
RirG019820	5346	5346_1	GO:0008152=>metabolic process=>rkm4_yeast ame: full=ribosomal n-lysine methyltransferase 4 ame: full=set domain-containing protein 7;GO:0016740=>transferase activity=>rkm4_yeast ame: full=ribosomal n-lysine methyltransferase 4 ame: full=set domain-containing protein 7);	PF00856=>SET domain;	IPR001214 (SET domain; IPR015353 (Rubisco LS methyltransferase, substrate-binding domain)
RirG019830				PF09273=>Rubisco LSMT substrate-binding;	IPR015353 (Rubisco LS methyltransferase, substrate-binding domain)
RirG019840	3567	3567_1	GO:0003824=>catalytic activity=>rib4_mago7 ame: full= -dimethyl-8-ribityllumazine synthase short=dmrl synthase short=ls short=lumazine synthase;GO:0008152=>metabolic process=>rib4_mago7 ame: full= -dimethyl-8-ribityllumazine synthase short=dmrl synthase short=ls short=lumazine synthase;GO:0009507=>chloroplast=>rib4_mago7 ame: full= -dimethyl-8-ribityllumazine synthase short=dmrl synthase short=ls…	PF00885=>6,7-dimethyl-8-ribityllumazine synthase;	IPR002180 (6,7-dimethyl-8-ribityllumazine synthase)
RirG019850	432	432_1		PF00293=>NUDIX domain;	IPR015797 (NUDIX hydrolase domain-like)
RirG019860	3913	3913_1	GO:0005739=>mitochondrion=>lacb2_rat ame: full=beta-lactamase-like protein 2);	PF00753=>Metallo-beta-lactamase superfamily;	IPR001279 (Beta-lactamase-like)
RirG019870	2361	2361_1	GO:0000123=>histone acetyltransferase complex=>prp17_mouse ame: full=pre-mrna-processing factor 17 ame: full=cell division cycle 40 homolog ame: full=prp17 homolog;GO:0000398=>mRNA splicing, via spliceosome=>prp17_mouse ame: full=pre-mrna-processing factor 17 ame: full=cell division cycle 40 homolog ame: full=prp17 homolog;GO:0005515=>protein binding=>prp17_mouse ame: full=pre-mrna-processing fac…	PF00400=>WD domain;G-beta repeat;	IPR015943 (WD40/YVTN repeat-like-containing domain; IPR020472 (G-protein beta WD-40 repeat)
RirG019880	1713	1713_1	GO:0005634=>nucleus=>dus12_rat ame: full=dual specificity protein phosphatase 12 ame: full=glucokinase-associated dual specificity phosphatase short=gkap;GO:0005737=>cytoplasm=>dus12_rat ame: full=dual specificity protein phosphatase 12 ame: full=glucokinase-associated dual specificity phosphatase short=gkap;GO:0008138=>protein tyrosine/serine/threonine phosphatase activity=>dus12_rat ame: full=d…
RirG019890	11215	11215_1
RirG019900	1	1_125		PF00078=>Reverse transcriptase (RNA-dependent DNA polymerase);	IPR015706 (RNA-directed DNA polymerase (reverse transcriptase))
RirG019910	20	20_4
RirG019920	9	9_4
RirG019930	18	18_9		PF00651=>BTB/POZ domain;PF07534=>TLD;	IPR006571 (TLDc; IPR011333 (BTB/POZ fold; IPR013089 (Kelch-related)
RirG019940	9	9_2
RirG019950	13	13_7	GO:0004706=>JUN kinase kinase kinase activity=>y9957_dicdi ame: full=probable serine threonine-protein kinase ddb_g0276181;GO:0005007=>fibroblast growth factor-activated receptor activity=>y9957_dicdi ame: full=probable serine threonine-protein kinase ddb_g0276181;GO:0005730=>nucleolus=>y9957_dicdi ame: full=probable serine threonine-protein kinase ddb_g0276181;GO:0005783=>endoplasmic reticulum=>…	PF07714=>Protein tyrosine kinase;	IPR011009 (Protein kinase-like domain)
RirG019960	1	1_1
RirG019970
RirG019980	3221	3221_1		PF01734=>Patatin-like phospholipase;	IPR011990 (Tetratricopeptide-like helical; IPR016035 (Acyl transferase/acyl hydrolase/lysophospholipase)
[truncated: 25,394 more rows]
