# Supplementary material for: Single Nucleus Genome Sequencing Reveals High Similarity among Nuclei of an Endomycorrhizal Fungus
Source: PLoS Genet. 2014 Jan 9;10(1):e1004078. doi: 10.1371/journal.pgen.1004078 (PMC3886924; doi:10.1371/journal.pgen.1004078)
Supplement: Table S6 — Putative orthology groups. OrthoMCL clustering of genes from 10 species representing all 5 fungal phyla. Rir = Rhizophagus irregularis (Glomeromycota);Sac = Saccharomyces cerevisiae (Ascomycota); Nec = Neurospora crassa (Ascomycota); Tum = Tuber melanosporum (Ascomycota); Mag = Magnaporte grisae (Ascomycota); Lab = Laccaria bicolor (Basidiomycota); Usm = Ustilago maydis (Basisdiomycota); Rho = Rhizopus oryzae (Zygomycota); Phb = Phycomyces blakeseanus (Zygomycota); Bad = Batrachochytrium dendrobatidis (Chytridiomycota); Mob = Monosiga brevicollis (Choanoflagellida; outgroup). GO = identifiers in Gene Ontology database (www.geneontology.org); InterPro = domain identifiers in InterPro database (www.ebi.ac.uk/interpro); SGD = annotation retrieved from the Saccharomyces Genome Database (www.yeastgenome.org). (XLSX) [file pgen.1004078.s013.xlsx]

## Sheet: readme
Table S3: Putative orthology groups (2 data sheets)
OrthoMCL clustering of predicted proteins from 10 species representing all 5 fungal phyla.
Rir = Rhizophagus irregularis (Glomeromycota)
Sac = Saccharomyces cerevisae (Ascomycota)
Nec = Neurospora crassa (Ascomycota)
Tum = Tuber melanosporum (Ascomycota)
Mag = Magnaporte grisae (Ascomycota)
Lab = Laccaria bicolor (Basisiomycota)
Usm = Ustilago maydis (Basisdiomycota)
Rho = Rhizopus oryzae (Zygomycota)
Phb = Phycomyces blakeseanus (Zygomycota)
Bad = Batrachochytrium dendrobatidis (Chytridiomycota)
Mob = Monosiga brevicollis (Choanoflagellida) [outgroup]

## Sheet: orthoMCL clusters
Table S6. Putative orthology groups
GroupID	Group_Num	SubgroupID	Subgroup_Num	Species:spe_num	GeneList
1	919	1_1	77
				rir:76	RirG151720	RirG179500	RirG121540	RirG230450	RirG128680	RirG072530	RirG147550	RirG073630	RirG095880	RirG201960	RirG198640	RirG144840	RirG224550	RirG098320	RirG255790	RirG127810	RirG223840	RirG192600	RirG263520	RirG224160	RirG135220	RirG144810	RirG130860	RirG054870	RirG153620	RirG125180	RirG169370	RirG026280	RirG125670	RirG170170	RirG074980	RirG249410	RirG212860	RirG022900	RirG010500	RirG066450	RirG008020	RirG270410	RirG003450	RirG129550	RirG249950	RirG115130	RirG046660	RirG079070	RirG121550
				rho:1	RO3G_13909
1	919	1_2	25
				rir:25	RirG268320	RirG270090	RirG108170	RirG249430	RirG144210	RirG221120	RirG229580	RirG197710	RirG142610	RirG185040	RirG170320	RirG137080	RirG246430	RirG217520	RirG084090	RirG077110	RirG068110	RirG071900	RirG057250	RirG066230	RirG080210	RirG065440	RirG008640	RirG010360	RirG013450
1	919	1_3	22
				rir:22	RirG091210	RirG121830	RirG125550	RirG272260	RirG199650	RirG122360	RirG168510	RirG124750	RirG255600	RirG150450	RirG131610	RirG171090	RirG125320	RirG210900	RirG172480	RirG212070	RirG270120	RirG110890	RirG059720	RirG080180	RirG058880	RirG054500
1	919	1_4	22
				rir:22	RirG256400	RirG176930	RirG269750	RirG208450	RirG110000	RirG216320	RirG249870	RirG196590	RirG131410	RirG252510	RirG244970	RirG115120	RirG196340	RirG197690	RirG155240	RirG201410	RirG199040	RirG123950	RirG164890	RirG083900	RirG056180	RirG056920
1	919	1_5	21
				rir:21	RirG211360	RirG120410	RirG199230	RirG114930	RirG179980	RirG138700	RirG158810	RirG122400	RirG131640	RirG124060	RirG252520	RirG171800	RirG155230	RirG214340	RirG179320	RirG107110	RirG052590	RirG025740	RirG012130	RirG079030	RirG072980
1	919	1_6	18
				rir:18	RirG079790	RirG219500	RirG256390	RirG235740	RirG090060	RirG198140	RirG241560	RirG147540	RirG162300	RirG244620	RirG164190	RirG194110	RirG270100	RirG202040	RirG249450	RirG078360	RirG056370	RirG054790
1	919	1_7	17
				rir:17	RirG221150	RirG155590	RirG155400	RirG127550	RirG163870	RirG185780	RirG171310	RirG139770	RirG222920	RirG117220	RirG139850	RirG127920	RirG010720	RirG055250	RirG056930	RirG060050	RirG005940
1	919	1_8	17
				rir:17	RirG163410	RirG169360	RirG182360	RirG196600	RirG208040	RirG164900	RirG141810	RirG269740	RirG229570	RirG144200	RirG149290	RirG250830	RirG185050	RirG158410	RirG054150	RirG080200	RirG070090
1	919	1_9	17
				rir:17	RirG203470	RirG123760	RirG119460	RirG155220	RirG179330	RirG164180	RirG048820	RirG226030	RirG272670	RirG222530	RirG068100	RirG118020	RirG057090	RirG065450	RirG137070	RirG012140	RirG052150
1	919	1_10	16
				rir:16	RirG180210	RirG163290	RirG098680	RirG222890	RirG135210	RirG248320	RirG210880	RirG163110	RirG167320	RirG133180	RirG238260	RirG103320	RirG054880	RirG030190	RirG056190	RirG031210
1	919	1_11	16
				rir:16	RirG270710	RirG185790	RirG157890	RirG127230	RirG124910	RirG124780	RirG130910	RirG119650	RirG208020	RirG131360	RirG129780	RirG141790	RirG171810	RirG144290	RirG108850	RirG083680
1	919	1_12	14
				rir:14	RirG136000	RirG238840	RirG195860	RirG169730	RirG189060	RirG210820	RirG108500	RirG158440	RirG266590	RirG226000	RirG183070	RirG121210	RirG164920	RirG131590
1	919	1_13	14
				rir:14	RirG259430	RirG255480	RirG144030	RirG126940	RirG239800	RirG269080	RirG233010	RirG164880	RirG128990	RirG194010	RirG127650	RirG151310	RirG057760	RirG027280
1	919	1_14	13
				rir:13	RirG142400	RirG143900	RirG166850	RirG210870	RirG117270	RirG150710	RirG163420	RirG054670	RirG141450	RirG139760	RirG142360	RirG083930	RirG044170
1	919	1_15	13
				rir:13	RirG252980	RirG250820	RirG149250	RirG214330	RirG122250	RirG223830	RirG208030	RirG177860	RirG159320	RirG196080	RirG124630	RirG054490	RirG011110
1	919	1_16	12
				rir:12	RirG269940	RirG233030	RirG128910	RirG222130	RirG186690	RirG222520	RirG153550	RirG172500	RirG268230	RirG219960	RirG225520	RirG023220
1	919	1_17	12
				rir:12	RirG182150	RirG201400	RirG141460	RirG219020	RirG196320	RirG201730	RirG196070	RirG252970	RirG208050	RirG237520	RirG135020	RirG047140
1	919	1_18	11
				rir:11	RirG127860	RirG144820	RirG263560	RirG196610	RirG127400	RirG198170	RirG125730	RirG254760	RirG068850	RirG083920	RirG008750
1	919	1_19	11
				rir:11	RirG140400	RirG130540	RirG133300	RirG132590	RirG246360	RirG161440	RirG269320	RirG199240	RirG179970	RirG117990	RirG072360
1	919	1_20	10
				rir:10	RirG222930	RirG124600	RirG239830	RirG244300	RirG120420	RirG084660	RirG163880	RirG155580	RirG151610	RirG172510
1	919	1_21	10
				rir:10	RirG129370	RirG268330	RirG263530	RirG259420	RirG124550	RirG124970	RirG132300	RirG070670	RirG057770	RirG008730
1	919	1_22	9
				rir:9	RirG137750	RirG106440	RirG181650	RirG241980	RirG196760	RirG153610	RirG246350	RirG177870	RirG112440
1	919	1_23	9
				rir:9	RirG135740	RirG219940	RirG199190	RirG210890	RirG123750	RirG057350	RirG047130	RirG163710	RirG124590
1	919	1_24	9
				rir:9	RirG239880	RirG272630	RirG201210	RirG193990	RirG152800	RirG180840	RirG116490	RirG195210	RirG008570
1	919	1_25	9
				rir:9	RirG196480	RirG108830	RirG162870	RirG178300	RirG116080	RirG147530	RirG101640	RirG083450	RirG056940
1	919	1_26	9
				rir:9	RirG196330	RirG263540	RirG244960	RirG212090	RirG159390	RirG164910	RirG131250	RirG103310	RirG118000
1	919	1_27	9
				rir:9	RirG197700	RirG229550	RirG171300	RirG129380	RirG083910	RirG080510	RirG008810	RirG024000	RirG004190
1	919	1_28	8
				rir:8	RirG083670	RirG127390	RirG163570	RirG167880	RirG245010	RirG214270	RirG124310	RirG057060
1	919	1_29	8
				rir:8	RirG130680	RirG255580	RirG142620	RirG076530	RirG133730	RirG199180	RirG182390	RirG269180
1	919	1_30	8
				rir:8	RirG182380	RirG222860	RirG124840	RirG185570	RirG094410	RirG201190	RirG068490	RirG009660
1	919	1_31	7
				rir:7	RirG142130	RirG255590	RirG235420	RirG103330	RirG136410	RirG156140	RirG148970
1	919	1_32	7
				rir:7	RirG119520	RirG203420	RirG162810	RirG167450	RirG214450	RirG010310	RirG005840
1	919	1_33	7
				rir:7	RirG220030	RirG197060	RirG104920	RirG114410	RirG053700	RirG035010	RirG045610
1	919	1_34	7
				rir:7	RirG123740	RirG127380	RirG222500	RirG221160	RirG164210	RirG079050	RirG059210
1	919	1_35	7
				rir:7	RirG219030	RirG222900	RirG249460	RirG199640	RirG182140	RirG083320	RirG197430
1	919	1_36	7
				rir:7	RirG197380	RirG076260	RirG096170	RirG113820	RirG080790	RirG123170	RirG012720
1	919	1_37	7
				rir:7	RirG244380	RirG268340	RirG139700	RirG150680	RirG152340	RirG022380	RirG011690
1	919	1_38	7
				rir:7	RirG219170	RirG272270	RirG129270	RirG080190	RirG121600	RirG066130	RirG011740
1	919	1_39	6
				rir:6	RirG204730	RirG103460	RirG134440	RirG268090	RirG261410	RirG213160
1	919	1_40	6
				rir:6	RirG225510	RirG047070	RirG160030	RirG057130	RirG101950	RirG041110
1	919	1_41	6
				rir:6	RirG171320	RirG142380	RirG150700	RirG120750	RirG024120	RirG067200
1	919	1_42	6
				rir:6	RirG254730	RirG080680	RirG066430	RirG197320	RirG158820	RirG197720
1	919	1_43	6
				rir:6	RirG112830	RirG124290	RirG202260	RirG269840	RirG180830	RirG103700
1	919	1_44	6
				rir:6	RirG249440	RirG170410	RirG171330	RirG070430	RirG010350	RirG056380
1	919	1_45	6
				rir:6	RirG270610	RirG071460	RirG206360	RirG062620	RirG177680	RirG050620
1	919	1_46	6
				rir:6	RirG222910	RirG239810	RirG201200	RirG236070	RirG140420	RirG122490
1	919	1_47	6
				rir:6	RirG268660	RirG251120	RirG142450	RirG102000	RirG124850	RirG009920
1	919	1_48	6
				rir:6	RirG164200	RirG222140	RirG222510	RirG152330	RirG087990	RirG130330
1	919	1_49	6
				rir:6	RirG119150	RirG130190	RirG143480	RirG194000	RirG117620	RirG106510
1	919	1_50	5
				rir:5	RirG178360	RirG220750	RirG153650	RirG155310	RirG246440
1	919	1_51	5
				rir:5	RirG113830	RirG176940	RirG266790	RirG091830	RirG063730
1	919	1_52	5
				rir:5	RirG148980	RirG140050	RirG159380	RirG073730	RirG007320
1	919	1_53	5
				rir:5	RirG066140	RirG021610	RirG130030	RirG057780	RirG066440
1	919	1_54	5
				rir:5	RirG257260	RirG067060	RirG161360	RirG097350	RirG024220
1	919	1_55	5
				rir:5	RirG263550	RirG172490	RirG254740	RirG130410	RirG010080
1	919	1_56	5
				rir:5	RirG143560	RirG162820	RirG142390	RirG137470	RirG021990
1	919	1_57	5
				rir:5	RirG164850	RirG181490	RirG170000	RirG136250	RirG162830
1	919	1_58	5
				rir:5	RirG222870	RirG201390	RirG143570	RirG152320	RirG010420
1	919	1_59	5
				rir:5	RirG185290	RirG178290	RirG181990	RirG083660	RirG074600
1	919	1_60	5
				rir:5	RirG091840	RirG171290	RirG128670	RirG153600	RirG058700
1	919	1_61	5
				rir:5	RirG124980	RirG258500	RirG185590	RirG142630	RirG022780
1	919	1_62	5
				rir:5	RirG222880	RirG232940	RirG056600	RirG005980	RirG003950
1	919	1_63	5
				rir:5	RirG238370	RirG254590	RirG076680	RirG202860	RirG102240
1	919	1_64	4
				rir:4	RirG155700	RirG235990	RirG144880	RirG219110
1	919	1_65	4
				rir:4	RirG254580	RirG117610	RirG246400	RirG236010
1	919	1_66	4
				rir:4	RirG249910	RirG202050	RirG070360	RirG001260
1	919	1_67	4
				rir:4	RirG103760	RirG159580	RirG101780	RirG119140
1	919	1_68	4
				rir:4	RirG118010	RirG140790	RirG051900	RirG052140
1	919	1_69	4
				rir:4	RirG161450	RirG223820	RirG057370	RirG076010
1	919	1_70	4
				rir:4	RirG124300	RirG050540	RirG223700	RirG202130
1	919	1_71	4
				rir:4	RirG272610	RirG159910	RirG162320	RirG196090
1	919	1_72	4
				rir:4	RirG209350	RirG098310	RirG160020	RirG110380
1	919	1_73	4
				rir:4	RirG249790	RirG096610	RirG022890	RirG042850
1	919	1_74	4
				rir:4	RirG157110	RirG057240	RirG017830	RirG003610
1	919	1_75	4
				rir:4	RirG199250	RirG125460	RirG126040	RirG185600
1	919	1_76	4
				rir:4	RirG199200	RirG181400	RirG263570	RirG131140
1	919	1_77	4
				rir:4	RirG273500	RirG196470	RirG179260	RirG012550
1	919	1_78	4
				rir:4	RirG196460	RirG273530	RirG192610	RirG204580
1	919	1_79	4
				rir:4	RirG241970	RirG181670	RirG126310	RirG074590
1	919	1_80	4
				rir:4	RirG144760	RirG098790	RirG246410	RirG067050
1	919	1_81	4
				rir:4	RirG124730	RirG128930	RirG143320	RirG123890
1	919	1_82	4
				rir:4	RirG131630	RirG169720	RirG141800	RirG079040
1	919	1_83	4
				rir:4	RirG026270	RirG115150	RirG067950	RirG026290
1	919	1_84	3
				rir:3	RirG219970	RirG079990	RirG141130
1	919	1_85	3
				rir:3	RirG083460	RirG257010	RirG169990
1	919	1_86	3
				rir:3	RirG130040	RirG104930	RirG074970
1	919	1_87	3
				rir:3	RirG180200	RirG199100	RirG073640
1	919	1_88	3
				rir:3	RirG127540	RirG215340	RirG016560
1	919	1_89	3
				rir:3	RirG272090	RirG239750	RirG144830
1	919	1_90	3
				rir:3	RirG084060	RirG098690	RirG068860
1	919	1_91	3
				rir:3	RirG271720	RirG127530	RirG068870
1	919	1_92	3
				rir:3	RirG199110	RirG255560	RirG009590
1	919	1_93	3
				rir:3	RirG143000	RirG229590	RirG010770
1	919	1_94	3
				rir:3	RirG238250	RirG167440	RirG142650
1	919	1_95	3
				rir:3	RirG222120	RirG066150	RirG221870
1	919	1_96	3
				rir:3	RirG212120	RirG270080	RirG080220
1	919	1_97	3
				rir:3	RirG241960	RirG199420	RirG074580
1	919	1_98	3
				rir:3	RirG140800	RirG120290	RirG150690
1	919	1_99	3
				rir:3	RirG116370	RirG120320	RirG031230
1	919	1_100	3
				rir:3	RirG140040	RirG139690	RirG122440
1	919	1_101	3
				rir:3	RirG233020	RirG255570	RirG182370
1	919	1_102	3
				rir:3	RirG129700	RirG224270	RirG011250
1	919	1_103	3
				rir:3	RirG249420	RirG080630	RirG068500
1	919	1_104	3
				rir:3	RirG202850	RirG272250	RirG150460
1	919	1_105	3
				rir:3	RirG257100	RirG180190	RirG009600
1	919	1_106	3
				rir:3	RirG024060	RirG023320	RirG013440
1	919	1_107	3
				rir:3	RirG230400	RirG068480	RirG121810
1	919	1_108	3
				rir:3	RirG229560	RirG185580	RirG004710
1	919	1_109	3
				rir:3	RirG135720	RirG020940	RirG116380
1	919	1_110	3
				rir:3	RirG170780	RirG170770	RirG090790
1	919	1_111	3
				rir:3	RirG271710	RirG073110	RirG011340
1	919	1_112	3
				rir:3	RirG270400	RirG016690	RirG177850
1	919	1_113	2
				rir:2	RirG244310	RirG053770
1	919	1_114	2
				rir:2	RirG212100	RirG239820
1	919	1_115	2
				rir:2	RirG220380	RirG020420
1	919	1_116	2
				rir:2	RirG137480	RirG217340
1	919	1_117	2
				rir:2	RirG167640	RirG044320
1	919	1_118	2
				rir:2	RirG178310	RirG106430
1	919	1_119	2
				rir:2	RirG125450	RirG126490
1	919	1_120	2
				rir:2	RirG132910	RirG076250
1	919	1_121	2
				rir:2	RirG167200	RirG021620
1	919	1_122	2
				rir:2	RirG212110	RirG000760
1	919	1_123	2
				rir:2	RirG051460	RirG077670
1	919	1_124	2
				rir:2	RirG070270	RirG057340
1	919	1_125	2
				rir:2	RirG024240	RirG019900
1	919	1_126	2
				rir:2	RirG135430	RirG238890
1	919	1_127	2
				rir:2	RirG210130	RirG146640
1	919	1_128	2
				rir:2	RirG187670	RirG010300
1	919	1_129	2
				rir:2	RirG135920	RirG059750
1	919	1_130	2
				rir:2	RirG188130	RirG021640
1	919	1_131	2
				rir:2	RirG272620	RirG123130
1	919	1_132	2
				rir:2	RirG159900	RirG238360
1	919	1_133	2
				rir:2	RirG163280	RirG164820
1	919	1_134	2
				rir:2	RirG245400	RirG066460
1	919	1_135	2
				rir:2	RirG197730	RirG208060
1	919	1_136	2
				rir:2	RirG153530	RirG151330
1	919	1_137	2
				rir:2	RirG163360	RirG070420
1	919	1_138	2
				rir:2	RirG260360	RirG076120
1	919	1_139	2
				rir:2	RirG124560	RirG012060
1	919	1_140	2
				rir:2	RirG121530	RirG170400
1	919	1_141	2
				rir:2	RirG187480	RirG088000
1	919	1_142	2
				rir:2	RirG241550	RirG203430
1	919	1_143	2
				rir:2	RirG144220	RirG153540
1	919	1_144	2
				rir:2	RirG140810	RirG011350
1	919	1_145	2
				rir:2	RirG135200	RirG142030
1	919	1_146	2
				rir:2	RirG224250	RirG132840
1	919	1_147	2
				rir:2	RirG127740	RirG126080
1	919	1_148	2
				rir:2	RirG037780	RirG110330
1	919	1_149	2
				rir:2	RirG270110	RirG131620
1	919	1_150	2
				rir:2	RirG117630	RirG234400
1	919	1_151	2
				rir:2	RirG057070	RirG024710
1	919	1_152	2
				rir:2	RirG057360	RirG005060
1	919	1_153	2
				rir:2	RirG138650	RirG024090
1	919	1_154	2
				rir:2	RirG031220	RirG125480
1	919	1_155	2
				rir:2	RirG141140	RirG079980
1	919	1_156	2
				rir:2	RirG076130	RirG105810
1	919	1_157	2
				rir:2	RirG071140	RirG051910
1	919	1_158	2
				rir:2	RirG162310	RirG006870
1	919	1_159	2
				rir:2	RirG024660	RirG172690
2	493	2_1	140
				rho:140	RO3G_08653	RO3G_11267	RO3G_10549	RO3G_12177	RO3G_16699	RO3G_05904	RO3G_01305	RO3G_13728	RO3G_07873	RO3G_04668	RO3G_03791	RO3G_17328	RO3G_17092	RO3G_16737	RO3G_16541	RO3G_16141	RO3G_15286	RO3G_13752	RO3G_12950	RO3G_10050	RO3G_07723	RO3G_05516	RO3G_02227	RO3G_01725	RO3G_17423	RO3G_14981	RO3G_14784	RO3G_11536	RO3G_05522	RO3G_15145	RO3G_03560	RO3G_15170	RO3G_09926	RO3G_03112	RO3G_10797	RO3G_16124	RO3G_16121	RO3G_05916	RO3G_07295	RO3G_01950	RO3G_17409	RO3G_15154	RO3G_13706	RO3G_12526	RO3G_15873
2	493	2_2	32
				rho:32	RO3G_07137	RO3G_17387	RO3G_16123	RO3G_01328	RO3G_10799	RO3G_17399	RO3G_06717	RO3G_11966	RO3G_14980	RO3G_09194	RO3G_05268	RO3G_17069	RO3G_03599	RO3G_05959	RO3G_05282	RO3G_07023	RO3G_04806	RO3G_04804	RO3G_16724	RO3G_09947	RO3G_14568	RO3G_03111	RO3G_17362	RO3G_05352	RO3G_07133	RO3G_17204	RO3G_04664	RO3G_01327	RO3G_14780	RO3G_16421	RO3G_10805	RO3G_14561
2	493	2_3	28
				rho:28	RO3G_04661	RO3G_16905	RO3G_08658	RO3G_13857	RO3G_10226	RO3G_17436	RO3G_15672	RO3G_12670	RO3G_14772	RO3G_07302	RO3G_04654	RO3G_12082	RO3G_09944	RO3G_07689	RO3G_06721	RO3G_04200	RO3G_17293	RO3G_10224	RO3G_11405	RO3G_09167	RO3G_02839	RO3G_13141	RO3G_07299	RO3G_05946	RO3G_07041	RO3G_10515	RO3G_15140	RO3G_00247
2	493	2_4	23
				rir:1	RirG131600
				lab:1	e_gw1.6.2026.1
				rho:21	RO3G_03617	RO3G_05640	RO3G_07103	RO3G_16119	RO3G_11950	RO3G_02702	RO3G_01699	RO3G_09203	RO3G_14546	RO3G_01700	RO3G_06413	RO3G_14988	RO3G_11526	RO3G_03557	RO3G_17277	RO3G_07727	RO3G_15901	RO3G_12465	RO3G_05413	RO3G_11532	RO3G_13275
2	493	2_5	22
				rho:22	RO3G_10795	RO3G_11235	RO3G_07984	RO3G_16698	RO3G_12172	RO3G_01205	RO3G_04682	RO3G_04117	RO3G_11264	RO3G_16383	RO3G_17214	RO3G_16689	RO3G_05435	RO3G_02956	RO3G_17308	RO3G_17325	RO3G_07876	RO3G_16431	RO3G_07040	RO3G_07038	RO3G_07030	RO3G_10743
2	493	2_6	21
				rho:21	RO3G_12672	RO3G_13000	RO3G_01738	RO3G_01938	RO3G_07111	RO3G_13754	RO3G_04671	RO3G_13860	RO3G_12004	RO3G_06435	RO3G_17333	RO3G_12173	RO3G_09950	RO3G_16430	RO3G_05932	RO3G_13138	RO3G_13295	RO3G_07859	RO3G_03989	RO3G_01310	RO3G_02701
2	493	2_7	20
				rho:20	RO3G_07136	RO3G_10528	RO3G_12013	RO3G_07119	RO3G_11528	RO3G_11263	RO3G_10742	RO3G_16377	RO3G_08848	RO3G_09487	RO3G_09485	RO3G_10036	RO3G_07029	RO3G_05933	RO3G_13139	RO3G_17463	RO3G_09942	RO3G_16715	RO3G_17406	RO3G_08835
2	493	2_8	18
				rho:18	RO3G_13284	RO3G_08838	RO3G_08662	RO3G_17233	RO3G_13457	RO3G_16546	RO3G_02850	RO3G_01617	RO3G_05637	RO3G_16820	RO3G_10228	RO3G_17216	RO3G_10776	RO3G_12978	RO3G_16543	RO3G_00251	RO3G_01963	RO3G_03606
2	493	2_9	14
				rho:14	RO3G_04128	RO3G_10231	RO3G_17468	RO3G_05351	RO3G_17359	RO3G_15151	RO3G_07716	RO3G_17152	RO3G_12665	RO3G_09618	RO3G_10051	RO3G_10034	RO3G_07719	RO3G_03561
2	493	2_10	14
				rho:14	RO3G_15864	RO3G_10790	RO3G_16726	RO3G_14971	RO3G_05415	RO3G_09949	RO3G_09948	RO3G_14976	RO3G_17366	RO3G_15665	RO3G_13862	RO3G_06736	RO3G_04666	RO3G_08113
2	493	2_11	13
				rho:13	RO3G_11262	RO3G_17324	RO3G_16798	RO3G_16796	RO3G_12963	RO3G_15149	RO3G_15249	RO3G_14627	RO3G_00285	RO3G_10516	RO3G_04803	RO3G_00294	RO3G_06724
2	493	2_12	12
				rho:12	RO3G_12065	RO3G_01306	RO3G_05914	RO3G_17465	RO3G_01195	RO3G_02847	RO3G_11274	RO3G_05949	RO3G_15666	RO3G_17238	RO3G_13729	RO3G_03586
2	493	2_13	11
				rho:11	RO3G_07124	RO3G_16418	RO3G_05939	RO3G_15664	RO3G_07132	RO3G_10798	RO3G_14770	RO3G_15261	RO3G_17017	RO3G_11781	RO3G_00238
2	493	2_14	11
				rho:11	RO3G_00745	RO3G_17461	RO3G_16540	RO3G_16120	RO3G_12189	RO3G_04694	RO3G_12062	RO3G_03608	RO3G_05273	RO3G_05922	RO3G_03782
2	493	2_15	10
				rho:10	RO3G_00675	RO3G_07298	RO3G_11533	RO3G_10237	RO3G_01709	RO3G_12084	RO3G_10785	RO3G_13267	RO3G_16725	RO3G_00250
2	493	2_16	10
				rho:10	RO3G_00689	RO3G_04786	RO3G_17361	RO3G_03785	RO3G_17307	RO3G_07979	RO3G_03797	RO3G_05920	RO3G_02679	RO3G_14620
2	493	2_17	9
				rho:9	RO3G_03777	RO3G_17316	RO3G_06735	RO3G_12537	RO3G_11962	RO3G_06433	RO3G_15866	RO3G_10779	RO3G_03591
2	493	2_18	9
				rho:9	RO3G_03605	RO3G_13299	RO3G_13868	RO3G_04113	RO3G_10537	RO3G_00690	RO3G_14557	RO3G_17149	RO3G_16907
2	493	2_19	8
				rho:8	RO3G_09959	RO3G_14564	RO3G_15148	RO3G_15144	RO3G_17360	RO3G_13851	RO3G_13713	RO3G_16690
2	493	2_20	7
				rho:7	RO3G_14989	RO3G_14987	RO3G_01587	RO3G_16825	RO3G_16538	RO3G_14974	RO3G_09952
2	493	2_21	7
				rho:7	RO3G_12070	RO3G_11270	RO3G_05628	RO3G_08660	RO3G_05264	RO3G_16142	RO3G_11238
2	493	2_22	7
				rho:7	RO3G_03798	RO3G_13281	RO3G_12654	RO3G_03805	RO3G_12076	RO3G_13703	RO3G_17310
2	493	2_23	7
				rho:7	RO3G_02715	RO3G_11280	RO3G_05638	RO3G_13770	RO3G_03620	RO3G_08833	RO3G_11283
2	493	2_24	7
				rho:7	RO3G_13283	RO3G_07309	RO3G_16718	RO3G_13740	RO3G_09958	RO3G_14720	RO3G_03613
2	493	2_25	6
				rho:6	RO3G_16548	RO3G_03612	RO3G_02961	RO3G_10862	RO3G_00677	RO3G_05950
2	493	2_26	5
				rho:5	RO3G_13276	RO3G_07097	RO3G_17437	RO3G_11273	RO3G_01588
2	493	2_27	5
				rho:5	RO3G_12178	RO3G_10783	RO3G_05923	RO3G_07710	RO3G_04781
2	493	2_28	4
				rho:4	RO3G_07114	RO3G_01307	RO3G_11782	RO3G_02848
2	493	2_29	4
				rho:4	RO3G_17213	RO3G_12174	RO3G_16118	RO3G_01710
2	493	2_30	4
				rho:4	RO3G_05632	RO3G_14786	RO3G_06417	RO3G_14555
2	493	2_31	3
				rho:3	RO3G_07995	RO3G_16426	RO3G_03936
2	493	2_32	2
				rho:2	RO3G_13282	RO3G_06426
3	397	3_1	82
				phb:1	fgeneshPB_pg.9__412
				rho:81	RO3G_12532	RO3G_16693	RO3G_16539	RO3G_12538	RO3G_09493	RO3G_10804	RO3G_01614	RO3G_13918	RO3G_06425	RO3G_12673	RO3G_07311	RO3G_17021	RO3G_09547	RO3G_05330	RO3G_04933	RO3G_03778	RO3G_02704	RO3G_04126	RO3G_12677	RO3G_17422	RO3G_16361	RO3G_12527	RO3G_01936	RO3G_14347	RO3G_05344	RO3G_02821	RO3G_10991	RO3G_06502	RO3G_17287	RO3G_15573	RO3G_13849	RO3G_10420	RO3G_03749	RO3G_01944	RO3G_17446	RO3G_02966	RO3G_07098	RO3G_01745	RO3G_16557	RO3G_17438	RO3G_03098	RO3G_05960	RO3G_13859	RO3G_16744	RO3G_15869
3	397	3_2	31
				rho:31	RO3G_08105	RO3G_08608	RO3G_15136	RO3G_07969	RO3G_13302	RO3G_07104	RO3G_06737	RO3G_07668	RO3G_10052	RO3G_02699	RO3G_02709	RO3G_09482	RO3G_10656	RO3G_17381	RO3G_04220	RO3G_17014	RO3G_13861	RO3G_08969	RO3G_11478	RO3G_12197	RO3G_17444	RO3G_13854	RO3G_15861	RO3G_00584	RO3G_05519	RO3G_02688	RO3G_02692	RO3G_03099	RO3G_03757	RO3G_03774	RO3G_04801
3	397	3_3	23
				rho:23	RO3G_03619	RO3G_01733	RO3G_05865	RO3G_15671	RO3G_11965	RO3G_16691	RO3G_16752	RO3G_13749	RO3G_15169	RO3G_01208	RO3G_09606	RO3G_02953	RO3G_10873	RO3G_05353	RO3G_16915	RO3G_13144	RO3G_17289	RO3G_10860	RO3G_17018	RO3G_07105	RO3G_15289	RO3G_05338	RO3G_10561
3	397	3_4	23
				rho:23	RO3G_07123	RO3G_02849	RO3G_07982	RO3G_05217	RO3G_00697	RO3G_12973	RO3G_11778	RO3G_15259	RO3G_07035	RO3G_02851	RO3G_08655	RO3G_08650	RO3G_10728	RO3G_17326	RO3G_01965	RO3G_12650	RO3G_16143	RO3G_04118	RO3G_17329	RO3G_17318	RO3G_12533	RO3G_17274	RO3G_07028
3	397	3_5	20
				rho:20	RO3G_00239	RO3G_00298	RO3G_01966	RO3G_17165	RO3G_08107	RO3G_15863	RO3G_12952	RO3G_16562	RO3G_01967	RO3G_11520	RO3G_09538	RO3G_15133	RO3G_02705	RO3G_17023	RO3G_03990	RO3G_14348	RO3G_05918	RO3G_02816	RO3G_12959	RO3G_11976
3	397	3_6	18
				rho:18	RO3G_02707	RO3G_00486	RO3G_10558	RO3G_01927	RO3G_12471	RO3G_16561	RO3G_13301	RO3G_15143	RO3G_10535	RO3G_05345	RO3G_07728	RO3G_13915	RO3G_12183	RO3G_02833	RO3G_01330	RO3G_11776	RO3G_02222	RO3G_05410
3	397	3_7	14
				rho:14	RO3G_10181	RO3G_07740	RO3G_09202	RO3G_07993	RO3G_02955	RO3G_10864	RO3G_05270	RO3G_17454	RO3G_17392	RO3G_11242	RO3G_09604	RO3G_17405	RO3G_08665	RO3G_12054
3	397	3_8	13
				rho:13	RO3G_17370	RO3G_05626	RO3G_02682	RO3G_15862	RO3G_12182	RO3G_15274	RO3G_11272	RO3G_13916	RO3G_15288	RO3G_07729	RO3G_02834	RO3G_06743	RO3G_05346
3	397	3_9	12
				rho:12	RO3G_14995	RO3G_05271	RO3G_00290	RO3G_13152	RO3G_15134	RO3G_09540	RO3G_11284	RO3G_13853	RO3G_03988	RO3G_12951	RO3G_14346	RO3G_17271
3	397	3_10	11
				rho:11	RO3G_12530	RO3G_11473	RO3G_02820	RO3G_01937	RO3G_03765	RO3G_03618	RO3G_08831	RO3G_15388	RO3G_11944	RO3G_05629	RO3G_05528
3	397	3_11	10
				phb:1	fgeneshPB_pg.12__168
				rho:9	RO3G_02708	RO3G_12470	RO3G_16132	RO3G_00303	RO3G_07666	RO3G_00705	RO3G_10802	RO3G_09376	RO3G_12194
3	397	3_12	10
				rho:10	RO3G_00701	RO3G_07971	RO3G_05266	RO3G_10053	RO3G_12472	RO3G_10803	RO3G_11479	RO3G_03563	RO3G_05265	RO3G_05903
3	397	3_13	9
				rho:9	RO3G_06442	RO3G_13867	RO3G_09965	RO3G_03547	RO3G_02691	RO3G_13920	RO3G_02959	RO3G_15250	RO3G_17371
3	397	3_14	9
				rho:9	RO3G_17383	RO3G_05520	RO3G_12181	RO3G_04115	RO3G_17404	RO3G_15276	RO3G_12193	RO3G_17428	RO3G_07974
3	397	3_15	8
				rho:8	RO3G_00241	RO3G_00296	RO3G_05515	RO3G_03769	RO3G_01964	RO3G_01613	RO3G_11785	RO3G_12463
3	397	3_16	8
				rho:8	RO3G_00307	RO3G_16696	RO3G_14356	RO3G_05617	RO3G_11783	RO3G_11234	RO3G_09735	RO3G_17158
3	397	3_17	7
				rho:7	RO3G_00242	RO3G_00295	RO3G_11414	RO3G_13722	RO3G_04662	RO3G_01056	RO3G_10965
3	397	3_18	7
				rho:7	RO3G_15585	RO3G_04114	RO3G_02221	RO3G_12958	RO3G_05272	RO3G_17425	RO3G_16914
3	397	3_19	6
				rho:6	RO3G_05517	RO3G_17170	RO3G_12671	RO3G_16376	RO3G_11525	RO3G_08843
3	397	3_20	5
				rho:5	RO3G_00687	RO3G_09920	RO3G_17166	RO3G_17016	RO3G_05331
3	397	3_21	5
				rho:5	RO3G_02711	RO3G_12541	RO3G_09496	RO3G_00306	RO3G_04802
3	397	3_22	5
				rho:5	RO3G_15135	RO3G_17384	RO3G_05919	RO3G_06727	RO3G_08828
3	397	3_23	4
				rho:4	RO3G_16746	RO3G_11970	RO3G_06428	RO3G_06427
3	397	3_24	4
				rho:4	RO3G_01928	RO3G_11524	RO3G_16560	RO3G_03562
3	397	3_25	4
				rho:4	RO3G_02703	RO3G_05625	RO3G_11775	RO3G_02681
3	397	3_26	4
				rho:4	RO3G_16408	RO3G_12184	RO3G_03756	RO3G_02690
3	397	3_27	4
				rho:4	RO3G_10723	RO3G_08830	RO3G_11945	RO3G_12679
3	397	3_28	3
				rho:3	RO3G_05514	RO3G_12651	RO3G_08967
3	397	3_29	3
				rho:3	RO3G_01947	RO3G_01615	RO3G_17203
3	397	3_30	3
				rho:3	RO3G_14632	RO3G_17327	RO3G_07039
3	397	3_31	3
				rho:3	RO3G_03326	RO3G_11271	RO3G_15275
3	397	3_32	3
				rho:3	RO3G_12981	RO3G_15860	RO3G_08968
3	397	3_33	2
				rho:2	RO3G_02714	RO3G_00485
3	397	3_34	2
				rho:2	RO3G_01329	RO3G_01616
3	397	3_35	2
				rho:2	RO3G_01731	RO3G_17269
3	397	3_36	2
				rho:2	RO3G_09479	RO3G_09541
3	397	3_37	2
				rho:2	RO3G_17427	RO3G_06741
3	397	3_38	2
				rho:2	RO3G_16912	RO3G_00704
3	397	3_39	2
				rho:2	RO3G_13856	RO3G_17429
3	397	3_40	2
				rho:2	RO3G_02965	RO3G_02712
3	397	3_41	2
				rho:2	RO3G_14802	RO3G_01592
3	397	3_42	2
				rho:2	RO3G_07036	RO3G_16161
3	397	3_43	2
				rho:2	RO3G_05411	RO3G_08912
3	397	3_44	2
				rho:2	RO3G_08111	RO3G_11784
3	397	3_45	2
				rho:2	RO3G_12534	RO3G_07027
4	383	4_1	38
				phb:7	fgeneshPB_pg.4__4	fgeneshPB_pg.50__52	fgeneshPB_pg.430__2	fgeneshPB_pg.25__21	fgeneshPB_pg.16__4	fgeneshPB_pg.68__41	fgeneshPB_pg.445__1
				rho:31	RO3G_16707	RO3G_05924	RO3G_13744	RO3G_12074	RO3G_05525	RO3G_02229	RO3G_05926	RO3G_09928	RO3G_17155	RO3G_12962	RO3G_11954	RO3G_05639	RO3G_03991	RO3G_16799	RO3G_01719	RO3G_17201	RO3G_09174	RO3G_17250	RO3G_16365	RO3G_07863	RO3G_06414	RO3G_14562	RO3G_07736	RO3G_13449	RO3G_12967	RO3G_10748	RO3G_07861	RO3G_10533	RO3G_17254	RO3G_17220	RO3G_16903
4	383	4_2	29
				phb:10	fgeneshPB_pg.8__197	fgeneshPB_pg.38__91	fgeneshPB_pg.4__7	fgeneshPB_pg.23__35	fgeneshPB_pg.66__56	estExt_fgeneshPB_pg.C_12330001	fgeneshPB_pg.67__57	fgeneshPB_pg.10__363	fgeneshPB_pg.25__56	fgeneshPB_pg.1__261
				rho:19	RO3G_00280	RO3G_15491	RO3G_01191	RO3G_10260	RO3G_05674	RO3G_04108	RO3G_14778	RO3G_03992	RO3G_04506	RO3G_06980	RO3G_14214	RO3G_15984	RO3G_10539	RO3G_09953	RO3G_15269	RO3G_07556	RO3G_02139	RO3G_10353	RO3G_04742
4	383	4_3	25
				rho:25	RO3G_15802	RO3G_12567	RO3G_07854	RO3G_06775	RO3G_04252	RO3G_02364	RO3G_11952	RO3G_12964	RO3G_05927	RO3G_12075	RO3G_05925	RO3G_16708	RO3G_09927	RO3G_07869	RO3G_15674	RO3G_11967	RO3G_15268	RO3G_15265	RO3G_04121	RO3G_14350	RO3G_16800	RO3G_13217	RO3G_14352	RO3G_16779	RO3G_13222
4	383	4_4	23
				phb:6	fgeneshPB_pg.7__234	fgeneshPB_pg.264__2	fgeneshPB_pg.125__1	fgeneshPB_pg.18__257	fgeneshPB_pg.52__48	fgeneshPB_pg.60__2
				rho:17	RO3G_04505	RO3G_05098	RO3G_04131	RO3G_10820	RO3G_11694	RO3G_06348	RO3G_03269	RO3G_11574	RO3G_16573	RO3G_08467	RO3G_07834	RO3G_17156	RO3G_17453	RO3G_13218	RO3G_01721	RO3G_07865	RO3G_05422
4	383	4_5	21
				phb:1	fgeneshPB_pg.10__362
				rho:20	RO3G_00794	RO3G_03719	RO3G_08299	RO3G_14836	RO3G_12520	RO3G_16086	RO3G_03519	RO3G_00797	RO3G_14949	RO3G_04496	RO3G_16777	RO3G_09229	RO3G_04123	RO3G_13221	RO3G_13224	RO3G_04120	RO3G_07988	RO3G_07862	RO3G_07735	RO3G_17255
4	383	4_6	21
				rho:21	RO3G_00017	RO3G_06028	RO3G_01297	RO3G_02367	RO3G_12916	RO3G_11394	RO3G_14854	RO3G_06445	RO3G_00150	RO3G_00133	RO3G_16793	RO3G_10178	RO3G_10175	RO3G_15370	RO3G_09524	RO3G_06306	RO3G_09095	RO3G_08061	RO3G_12244	RO3G_12461	RO3G_00789
4	383	4_7	19
				phb:16	fgeneshPB_pg.10__361	fgeneshPB_pg.60__22	fgeneshPB_pg.10__378	fgeneshPB_pg.52__49	fgeneshPB_pg.10__366	fgeneshPB_pg.264__1	fgeneshPB_pg.33__56	fgeneshPB_pg.144__1	fgeneshPB_pg.316__1	fgeneshPB_pg.61__2	fgeneshPB_pg.74__4	fgeneshPB_pg.50__47	fgeneshPB_pg.33__55	fgeneshPB_pg.52__37	fgeneshPB_pg.207__2	fgeneshPB_pg.25__60
				rho:3	RO3G_12668	RO3G_10730	RO3G_11978
4	383	4_8	15
				rho:15	RO3G_08060	RO3G_16981	RO3G_06446	RO3G_14545	RO3G_00849	RO3G_02390	RO3G_16980	RO3G_06718	RO3G_11937	RO3G_00484	RO3G_16987	RO3G_05286	RO3G_01365	RO3G_06785	RO3G_06779
4	383	4_9	13
				rho:13	RO3G_00483	RO3G_13700	RO3G_04197	RO3G_09086	RO3G_02937	RO3G_02422	RO3G_13493	RO3G_13486	RO3G_08479	RO3G_09233	RO3G_05627	RO3G_11568	RO3G_04136
4	383	4_10	13
				rho:13	RO3G_13904	RO3G_04915	RO3G_11186	RO3G_05203	RO3G_04375	RO3G_03390	RO3G_07593	RO3G_16466	RO3G_14465	RO3G_14492	RO3G_08305	RO3G_08327	RO3G_05190
4	383	4_11	12
				rho:12	RO3G_14622	RO3G_13746	RO3G_05953	RO3G_11279	RO3G_15267	RO3G_14777	RO3G_01294	RO3G_16366	RO3G_10744	RO3G_10543	RO3G_11979	RO3G_13448
4	383	4_12	9
				phb:1	fgeneshPB_pg.18__258
				rho:8	RO3G_17033	RO3G_12456	RO3G_09507	RO3G_08181	RO3G_03515	RO3G_01653	RO3G_04203	RO3G_10745
4	383	4_13	8
				rho:8	RO3G_03382	RO3G_06354	RO3G_09771	RO3G_04449	RO3G_13030	RO3G_08664	RO3G_12881	RO3G_13496
4	383	4_14	8
				rho:8	RO3G_00682	RO3G_12965	RO3G_09954	RO3G_10544	RO3G_00692	RO3G_08610	RO3G_15676	RO3G_10538
4	383	4_15	7
				phb:1	fgeneshPB_pg.74__3
				rho:6	RO3G_14624	RO3G_11278	RO3G_13225	RO3G_13865	RO3G_10777	RO3G_01157
4	383	4_16	7
				phb:5	fgeneshPB_pg.172__1	fgeneshPB_pg.616__1	fgeneshPB_pg.25__58	fgeneshPB_pg.38__70	fgeneshPB_pg.52__38
				rho:2	RO3G_00683	RO3G_13745
4	383	4_17	7
				rho:7	RO3G_05524	RO3G_10532	RO3G_06349	RO3G_17093	RO3G_09362	RO3G_09173	RO3G_17218
4	383	4_18	6
				rho:6	RO3G_08659	RO3G_08635	RO3G_00684	RO3G_17253	RO3G_10747	RO3G_05047
4	383	4_19	5
				phb:1	fgeneshPB_pg.85__1
				rho:4	RO3G_12961	RO3G_09951	RO3G_16818	RO3G_13219
4	383	4_20	5
				rho:5	RO3G_14691	RO3G_15368	RO3G_11933	RO3G_11589	RO3G_02773
4	383	4_21	5
				rho:5	RO3G_06780	RO3G_00570	RO3G_01156	RO3G_04583	RO3G_14466
4	383	4_22	5
				rho:5	RO3G_00851	RO3G_09374	RO3G_16343	RO3G_07270	RO3G_14060
4	383	4_23	4
				phb:3	fgeneshPB_pg.7__249	fgeneshPB_pg.52__20	fgeneshPB_pg.75__24
				rho:1	RO3G_17443
4	383	4_24	4
				phb:4	fgeneshPB_pg.10__367	fgeneshPB_pg.9__375	fgeneshPB_pg.52__42	fgeneshPB_pg.50__46
4	383	4_25	4
				phb:4	fgeneshPB_pg.10__365	fgeneshPB_pg.9__376	fgeneshPB_pg.372__1	fgeneshPB_pg.52__11
4	383	4_26	4
				phb:1	fgeneshPB_pg.157__1
				rho:3	RO3G_12669	RO3G_01720	RO3G_08609
4	383	4_27	4
				rho:4	RO3G_07656	RO3G_13572	RO3G_14744	RO3G_00622
4	383	4_28	4
				rho:4	RO3G_06792	RO3G_06346	RO3G_00856	RO3G_02756
4	383	4_29	4
				rho:4	RO3G_10709	RO3G_04499	RO3G_11674	RO3G_08680
4	383	4_30	4
				rho:4	RO3G_05952	RO3G_15266	RO3G_16797	RO3G_10746
4	383	4_31	3
				phb:3	fgeneshPB_pg.80__1	fgeneshPB_pg.1__258	fgeneshPB_pg.9__221
4	383	4_32	3
				phb:3	fgeneshPB_pg.188__3	fgeneshPB_pg.38__44	fgeneshPB_pg.61__43
4	383	4_33	3
				rho:3	RO3G_04030	RO3G_07488	RO3G_09361
4	383	4_34	3
				rho:3	RO3G_04914	RO3G_02353	RO3G_08790
4	383	4_35	3
				rho:3	RO3G_00134	RO3G_00149	RO3G_05962
4	383	4_36	3
				rho:3	RO3G_02455	RO3G_15297	RO3G_13654
4	383	4_37	3
				rho:3	RO3G_14105	RO3G_05621	RO3G_13484
4	383	4_38	3
				rho:3	RO3G_16730	RO3G_17015	RO3G_16358
4	383	4_39	2
				phb:2	fgeneshPB_pg.226__1	fgeneshPB_pg.161__3
4	383	4_40	2
				phb:2	fgeneshPB_pg.64__38	fgeneshPB_pg.60__3
4	383	4_41	2
				phb:1	fgeneshPB_pg.161__1
				rho:1	RO3G_17200
4	383	4_42	2
				rho:2	RO3G_04135	RO3G_16349
4	383	4_43	2
				rho:2	RO3G_12138	RO3G_00521
4	383	4_44	2
				rho:2	RO3G_06979	RO3G_05004
4	383	4_45	2
				rho:2	RO3G_03970	RO3G_13625
4	383	4_46	2
				rho:2	RO3G_00490	RO3G_00495
4	383	4_47	2
				rho:2	RO3G_11185	RO3G_16122
4	383	4_48	2
				rho:2	RO3G_01197	RO3G_12647
4	383	4_49	2
				rho:2	RO3G_13917	RO3G_17367
4	383	4_50	2
				rho:2	RO3G_13732	RO3G_13226
4	383	4_51	2
				rho:2	RO3G_04386	RO3G_05216
5	382	5_1	40
				rir:4	RirG181940	RirG221650	RirG159540	RirG135790
				phb:7	fgeneshPB_pg.42__38	fgeneshPB_pg.24__118	fgeneshPB_pg.32__114	fgeneshPB_pg.7__214	fgeneshPB_pg.90__5	fgeneshPB_pg.7__232	fgeneshPB_pg.7__219
				rho:29	RO3G_10217	RO3G_13273	RO3G_16749	RO3G_13145	RO3G_05424	RO3G_17257	RO3G_16136	RO3G_15889	RO3G_11531	RO3G_01207	RO3G_17358	RO3G_12169	RO3G_11771	RO3G_17385	RO3G_09940	RO3G_07686	RO3G_14710	RO3G_12009	RO3G_16138	RO3G_10725	RO3G_01309	RO3G_06430	RO3G_05958	RO3G_01740	RO3G_17441	RO3G_11404	RO3G_04785	RO3G_03589	RO3G_15580
5	382	5_2	36
				phb:31	fgeneshPB_pg.32__139	fgeneshPB_pg.68__28	fgeneshPB_pg.34__2	fgeneshPB_pg.1__247	fgeneshPB_pg.129__1	fgeneshPB_pg.18__66	fgeneshPB_pg.32__96	fgeneshPB_pg.25__181	fgeneshPB_pg.28__165	fgeneshPB_pg.28__161	fgeneshPB_pg.6__136	fgeneshPB_pg.64__26	fgeneshPB_pg.66__52	fgeneshPB_pg.17__15	fgeneshPB_pg.91__5	fgeneshPB_pg.50__34	fgeneshPB_pg.23__4	fgeneshPB_pg.7__252	fgeneshPB_pg.50__76	fgeneshPB_pg.38__109	fgeneshPB_pg.23__14	fgeneshPB_pg.19__255	fgeneshPB_pg.106__3	fgeneshPB_pg.42__9	fgeneshPB_pg.193__1	fgeneshPB_pg.2__253	fgeneshPB_pg.18__250	fgeneshPB_pg.59__1	fgeneshPB_pg.64__40	fgeneshPB_pg.144__3	fgeneshPB_pg.150__2
				rho:5	RO3G_00289	RO3G_09183	RO3G_17351	RO3G_04681	RO3G_01324
5	382	5_3	32
				rho:32	RO3G_00260	RO3G_10047	RO3G_01199	RO3G_16128	RO3G_09185	RO3G_07691	RO3G_01724	RO3G_12185	RO3G_17434	RO3G_07113	RO3G_13712	RO3G_17240	RO3G_15886	RO3G_05342	RO3G_14552	RO3G_13708	RO3G_11542	RO3G_16368	RO3G_12077	RO3G_07693	RO3G_13285	RO3G_17450	RO3G_12646	RO3G_05908	RO3G_13451	RO3G_01716	RO3G_16918	RO3G_14559	RO3G_01193	RO3G_10522	RO3G_13747	RO3G_07294
5	382	5_4	29
				rir:3	RirG227040	RirG119220	RirG058300
				lab:4	Lacbi1.eu2.Lbscf0043g00660	Lacbi1.fgenesh3_pg.C_scaffold_5000046	Lacbi1.fgenesh3_pg.C_scaffold_5000522	gm1.2652_g
				phb:9	fgeneshPB_pg.29__4	fgeneshPB_pg.42__16	fgeneshPB_pg.4__834	fgeneshPB_pg.43__7	fgeneshPB_pg.1__356	fgeneshPB_pg.5__15	fgeneshPB_pg.23__37	fgeneshPB_pg.50__41	fgeneshPB_pg.50__36
				rho:13	RO3G_00693	RO3G_03552	RO3G_16736	RO3G_15578	RO3G_04784	RO3G_13149	RO3G_07126	RO3G_13753	RO3G_07108	RO3G_10219	RO3G_10794	RO3G_01326	RO3G_01955
5	382	5_5	25
				rir:4	RirG258510	RirG196780	RirG181050	RirG171110
				phb:3	fgeneshPB_pg.23__24	fgeneshPB_pg.43__92	fgeneshPB_pg.380__1
				rho:18	RO3G_09601	RO3G_07698	RO3G_14550	RO3G_11538	RO3G_09930	RO3G_07307	RO3G_06731	RO3G_15898	RO3G_11409	RO3G_04683	RO3G_04212	RO3G_11969	RO3G_11237	RO3G_07721	RO3G_10039	RO3G_02828	RO3G_03555	RO3G_13148
5	382	5_6	25
				phb:25	fgeneshPB_pg.159__2	fgeneshPB_pg.67__55	fgeneshPB_pg.170__3	fgeneshPB_pg.296__1	fgeneshPB_pg.933__1	fgeneshPB_pg.71__23	fgeneshPB_pg.116__1	fgeneshPB_pg.39__111	fgeneshPB_pg.25__19	fgeneshPB_pg.8__199	fgeneshPB_pg.10__382	fgeneshPB_pg.22__219	fgeneshPB_pg.127__4	fgeneshPB_pg.104__2	fgeneshPB_pg.52__30	fgeneshPB_pg.12__174	fgeneshPB_pg.6__150	fgeneshPB_pg.36__114	fgeneshPB_pg.892__1	fgeneshPB_pg.22__229	fgeneshPB_pg.1__250	fgeneshPB_pg.10__266	fgeneshPB_pg.92__3	fgeneshPB_pg.1__257	fgeneshPB_pg.24__155
5	382	5_7	13
				rir:1	RirG196880
				phb:3	fgeneshPB_pg.32__3	fgeneshPB_pg.140__1	fgeneshPB_pg.52__14
				rho:9	RO3G_07978	RO3G_04658	RO3G_02232	RO3G_01323	RO3G_10518	RO3G_07130	RO3G_13866	RO3G_16739	RO3G_09192
5	382	5_8	12
				rir:10	RirG244340	RirG254150	RirG252060	RirG241260	RirG148000	RirG158650	RirG202350	RirG144080	RirG141670	RirG083970
				rho:2	RO3G_07980	RO3G_07737
5	382	5_9	11
				phb:7	fgeneshPB_pg.59__5	fgeneshPB_pg.74__2	fgeneshPB_pg.6__111	fgeneshPB_pg.9__5	fgeneshPB_pg.52__31	fgeneshPB_pg.3__718	fgeneshPB_pg.37__9
				rho:4	RO3G_12968	RO3G_05954	RO3G_05911	RO3G_07106
5	382	5_10	11
				phb:10	fgeneshPB_pg.24__128	fgeneshPB_pg.5__27	fgeneshPB_pg.1__1143	fgeneshPB_pg.8__204	fgeneshPB_pg.19__43	fgeneshPB_pg.25__169	fgeneshPB_pg.3__762	fgeneshPB_pg.38__117	fgeneshPB_pg.43__22	fgeneshPB_pg.9__407
				rho:1	RO3G_07697
5	382	5_11	10
				phb:4	fgeneshPB_pg.10__364	fgeneshPB_pg.1__246	fgeneshPB_pg.5__5	fgeneshPB_pg.5__52
				rho:6	RO3G_10049	RO3G_05426	RO3G_16827	RO3G_12012	RO3G_15150	RO3G_02686
5	382	5_12	8
				rir:2	RirG143410	RirG102470
				phb:6	fgeneshPB_pg.24__126	fgeneshPB_pg.423__1	fgeneshPB_pg.335__1	fgeneshPB_pg.4__588	fgeneshPB_pg.8__219	fgeneshPB_pg.68__25
5	382	5_13	8
				phb:6	fgeneshPB_pg.102__2	fgeneshPB_pg.5__6	fgeneshPB_pg.50__64	fgeneshPB_pg.50__62	fgeneshPB_pg.75__3	fgeneshPB_pg.9__219
				rho:2	RO3G_02819	RO3G_11949
5	382	5_14	8
				rho:8	RO3G_16559	RO3G_16427	RO3G_11951	RO3G_14994	RO3G_03609	RO3G_10736	RO3G_15260	RO3G_07304
5	382	5_15	7
				phb:4	fgeneshPB_pg.5__24	fgeneshPB_pg.430__1	fgeneshPB_pg.25__3	fgeneshPB_pg.91__3
				rho:3	RO3G_04592	RO3G_10735	RO3G_01954
5	382	5_16	6
				rir:4	RirG244870	RirG223770	RirG268450	RirG168010
				rho:2	RO3G_01727	RO3G_03587
5	382	5_17	6
				rir:1	RirG179990
				phb:4	fgeneshPB_pg.115__2	fgeneshPB_pg.147__2	fgeneshPB_pg.68__21	fgeneshPB_pg.9__79
				rho:1	RO3G_05427
5	382	5_18	6
				phb:3	fgeneshPB_pg.6__141	fgeneshPB_pg.5__50	fgeneshPB_pg.61__32
				rho:3	RO3G_10040	RO3G_03585	RO3G_16828
5	382	5_19	6
				rho:6	RO3G_05631	RO3G_08042	RO3G_12072	RO3G_07976	RO3G_14626	RO3G_03580
5	382	5_20	5
				rir:5	RirG185360	RirG157680	RirG239710	RirG129330	RirG128400
5	382	5_21	5
				phb:5	fgeneshPB_pg.6__520	fgeneshPB_pg.32__135	fgeneshPB_pg.1__259	fgeneshPB_pg.43__21	fgeneshPB_pg.6__193
5	382	5_22	4
				rir:4	RirG211600	RirG139780	RirG087920	RirG141650
5	382	5_23	4
				phb:4	fgeneshPB_pg.250__1	fgeneshPB_pg.105__2	fgeneshPB_pg.4__575	fgeneshPB_pg.10__360
5	382	5_24	4
				phb:2	fgeneshPB_pg.7__460	fgeneshPB_pg.69__41
				rho:2	RO3G_15258	RO3G_07128
5	382	5_25	4
				phb:4	fgeneshPB_pg.33__138	fgeneshPB_pg.74__7	fgeneshPB_pg.12__182	fgeneshPB_pg.55__8
5	382	5_26	4
				phb:4	fgeneshPB_pg.1__264	fgeneshPB_pg.2__247	fgeneshPB_pg.6__153	fgeneshPB_pg.254__1
5	382	5_27	4
				rho:4	RO3G_16899	RO3G_17212	RO3G_16740	RO3G_01728
5	382	5_28	3
				rir:3	RirG128950	RirG184590	RirG127130
5	382	5_29	3
				rir:3	RirG125720	RirG071300	RirG123050
5	382	5_30	3
				phb:3	estExt_fgeneshPB_pg.C_160299	fgeneshPB_pg.37__2	fgeneshPB_pg.2__213
5	382	5_31	3
				phb:3	fgeneshPB_pg.103__1	fgeneshPB_pg.3__726	fgeneshPB_pg.55__49
5	382	5_32	3
				phb:3	fgeneshPB_pg.7__86	fgeneshPB_pg.75__4	fgeneshPB_pg.116__3
5	382	5_33	3
				phb:2	fgeneshPB_pg.5__223	fgeneshPB_pg.59__20
				rho:1	RO3G_02818
5	382	5_34	3
				phb:1	fgeneshPB_pg.48__3
				rho:2	RO3G_10045	RO3G_16741
5	382	5_35	3
				phb:3	fgeneshPB_pg.22__214	fgeneshPB_pg.19__55	fgeneshPB_pg.75__7
5	382	5_36	3
				phb:3	fgeneshPB_pg.33__66	fgeneshPB_pg.9__377	fgeneshPB_pg.33__86
5	382	5_37	3
				phb:2	fgeneshPB_pg.50__63	fgeneshPB_pg.32__103
				rho:1	RO3G_17393
5	382	5_38	3
				phb:3	fgeneshPB_pg.8__196	fgeneshPB_pg.50__53	fgeneshPB_pg.117__3
5	382	5_39	2
				phb:2	fgeneshPB_pg.23__63	fgeneshPB_pg.24__165
5	382	5_40	2
				phb:2	fgeneshPB_pg.8__207	fgeneshPB_pg.52__1
5	382	5_41	2
				phb:2	fgeneshPB_pg.6__274	fgeneshPB_pg.6__161
5	382	5_42	2
				phb:1	fgeneshPB_pg.50__61
				rho:1	RO3G_09492
5	382	5_43	2
				phb:2	fgeneshPB_pg.146__4	fgeneshPB_pg.1__270
5	382	5_44	2
				phb:1	fgeneshPB_pg.50__87
				rho:1	RO3G_16900
5	382	5_45	2
				phb:1	fgeneshPB_pg.42__25
				rho:1	RO3G_00291
5	382	5_46	2
				phb:1	fgeneshPB_pg.52__16
				rho:1	RO3G_16738
6	380	6_1	176
				rir:176	RirG178990	RirG271920	RirG192400	RirG255900	RirG240730	RirG206050	RirG218900	RirG271900	RirG218910	RirG243500	RirG185310	RirG206040	RirG205620	RirG206060	RirG256440	RirG201110	RirG215050	RirG223350	RirG206100	RirG188470	RirG271910	RirG206080	RirG198610	RirG220260	RirG271890	RirG198010	RirG199820	RirG188460	RirG213250	RirG217820	RirG206070	RirG215070	RirG255890	RirG206030	RirG197590	RirG217830	RirG256430	RirG199810	RirG194750	RirG208280	RirG205730	RirG205720	RirG271880	RirG217850	RirG218860
6	380	6_2	148
				rir:148	RirG191000	RirG213660	RirG230020	RirG230010	RirG104550	RirG104540	RirG164040	RirG102640	RirG118900	RirG050520	RirG066770	RirG043430	RirG133440	RirG133520	RirG154750	RirG239100	RirG154740	RirG160190	RirG113650	RirG154780	RirG215250	RirG118880	RirG118890	RirG134790	RirG108260	RirG087800	RirG141920	RirG254480	RirG258330	RirG066750	RirG250120	RirG250030	RirG213680	RirG237430	RirG032090	RirG150620	RirG180590	RirG104530	RirG247530	RirG160200	RirG043930	RirG140540	RirG073350	RirG260200	RirG247500
6	380	6_3	17
				rir:17	RirG203280	RirG172020	RirG152690	RirG171020	RirG046340	RirG135420	RirG058850	RirG096740	RirG141940	RirG063440	RirG141510	RirG154760	RirG142950	RirG192420	RirG191030	RirG191660	RirG118860
6	380	6_4	15
				rir:15	RirG015860	RirG265750	RirG104510	RirG139510	RirG160910	RirG046350	RirG206020	RirG160930	RirG262550	RirG020610	RirG049680	RirG026350	RirG029070	RirG247560	RirG191540
6	380	6_5	5
				rir:5	RirG240740	RirG218950	RirG236580	RirG140950	RirG118270
6	380	6_6	5
				rir:5	RirG236510	RirG258990	RirG060780	RirG153690	RirG037280
6	380	6_7	5
				rir:5	RirG160840	RirG088350	RirG213630	RirG114210	RirG150550
6	380	6_8	3
				rir:3	RirG181640	RirG198620	RirG199800
6	380	6_9	3
				rir:3	RirG162730	RirG141030	RirG017250
6	380	6_10	3
				rir:3	RirG203220	RirG203230	RirG203240
7	362	7_1	64
				rir:64	RirG239160	RirG214610	RirG149890	RirG191630	RirG202740	RirG239180	RirG196840	RirG268110	RirG205760	RirG197970	RirG240230	RirG111380	RirG222620	RirG108220	RirG088280	RirG267470	RirG119060	RirG078970	RirG140030	RirG240000	RirG190710	RirG053220	RirG209190	RirG163550	RirG264140	RirG109470	RirG239250	RirG162980	RirG237120	RirG145830	RirG162060	RirG263800	RirG272650	RirG123260	RirG216350	RirG222200	RirG162370	RirG157550	RirG241510	RirG248650	RirG118430	RirG144460	RirG135010	RirG095610	RirG065680
7	362	7_2	57
				rir:57	RirG112760	RirG213750	RirG171490	RirG210550	RirG157370	RirG199480	RirG250100	RirG217310	RirG147480	RirG087300	RirG175870	RirG254490	RirG272950	RirG204470	RirG085280	RirG086430	RirG201580	RirG239200	RirG104150	RirG146160	RirG272960	RirG065730	RirG214630	RirG102660	RirG061690	RirG171600	RirG144470	RirG077820	RirG089620	RirG158990	RirG214160	RirG097500	RirG054140	RirG159060	RirG169090	RirG071450	RirG111390	RirG097390	RirG239080	RirG097750	RirG136230	RirG225710	RirG167300	RirG142300	RirG044640
7	362	7_3	27
				rir:27	RirG232250	RirG095130	RirG150290	RirG267240	RirG197740	RirG231850	RirG206520	RirG205820	RirG247470	RirG267230	RirG267210	RirG070950	RirG218980	RirG126020	RirG231820	RirG216970	RirG134160	RirG241440	RirG072590	RirG107900	RirG231840	RirG095770	RirG160450	RirG269930	RirG049480	RirG003390	RirG016270
7	362	7_4	26
				rir:26	RirG158970	RirG196130	RirG259550	RirG235640	RirG121150	RirG161930	RirG079610	RirG107820	RirG049260	RirG041470	RirG103670	RirG208400	RirG088080	RirG096490	RirG208480	RirG006120	RirG053710	RirG018180	RirG054680	RirG124370	RirG048430	RirG209070	RirG128040	RirG002410	RirG052820	RirG062130
7	362	7_5	24
				rir:24	RirG115680	RirG065750	RirG211420	RirG085160	RirG144710	RirG152840	RirG226220	RirG239070	RirG087250	RirG111240	RirG205680	RirG264120	RirG052560	RirG158960	RirG235220	RirG111360	RirG197980	RirG086670	RirG085310	RirG055180	RirG228020	RirG064010	RirG028720	RirG016790
7	362	7_6	20
				rir:20	RirG125150	RirG208490	RirG205670	RirG169100	RirG250110	RirG178590	RirG226230	RirG241590	RirG142290	RirG205660	RirG201880	RirG118910	RirG160010	RirG184920	RirG104210	RirG243460	RirG047930	RirG048930	RirG048940	RirG048110
7	362	7_7	19
				rir:19	RirG051590	RirG190040	RirG137180	RirG264060	RirG172180	RirG241600	RirG214150	RirG163300	RirG262340	RirG171540	RirG078960	RirG111060	RirG068180	RirG272060	RirG214170	RirG209530	RirG007600	RirG006320	RirG005630
7	362	7_8	17
				rir:17	RirG064030	RirG174750	RirG184910	RirG212580	RirG197850	RirG117600	RirG129420	RirG146170	RirG111250	RirG048950	RirG087260	RirG085300	RirG048130	RirG053130	RirG082190	RirG088070	RirG032270
7	362	7_9	14
				rir:14	RirG260890	RirG116800	RirG162020	RirG134870	RirG110280	RirG148750	RirG075020	RirG150810	RirG129390	RirG122410	RirG264070	RirG072750	RirG068800	RirG073260
7	362	7_10	14
				rir:14	RirG110270	RirG190030	RirG110720	RirG215560	RirG271220	RirG198460	RirG244070	RirG152200	RirG180300	RirG142340	RirG018840	RirG016550	RirG007590	RirG008690
7	362	7_11	12
				rir:12	RirG145370	RirG065890	RirG267460	RirG145350	RirG149870	RirG160070	RirG192160	RirG103820	RirG262040	RirG235630	RirG077860	RirG068190
7	362	7_12	9
				rir:9	RirG262030	RirG181710	RirG202470	RirG108390	RirG187020	RirG095140	RirG150530	RirG189740	RirG078890
7	362	7_13	9
				rir:9	RirG216980	RirG123530	RirG218590	RirG236910	RirG187050	RirG194920	RirG066690	RirG079620	RirG062550
7	362	7_14	9
				rir:9	RirG173940	RirG241450	RirG187030	RirG204920	RirG181700	RirG078860	RirG049770	RirG041710	RirG000850
7	362	7_15	8
				rir:8	RirG242590	RirG219040	RirG222150	RirG147060	RirG111050	RirG129410	RirG167940	RirG055190
7	362	7_16	8
				rir:8	RirG110400	RirG140450	RirG150820	RirG227960	RirG148760	RirG237470	RirG144700	RirG020470
7	362	7_17	8
				rir:8	RirG194910	RirG256960	RirG195640	RirG187010	RirG126000	RirG143590	RirG098930	RirG095150
7	362	7_18	6
				rir:6	RirG187040	RirG231830	RirG267250	RirG256970	RirG134060	RirG171610
7	362	7_19	4
				rir:4	RirG166210	RirG181680	RirG222170	RirG029750
7	362	7_20	3
				rir:3	RirG134150	RirG096500	RirG022090
7	362	7_21	2
				rir:2	RirG216360	RirG180170
7	362	7_22	2
				rir:2	RirG272660	RirG167950
8	361	8_1	61
				rir:61	RirG252450	RirG109670	RirG119030	RirG161350	RirG224530	RirG265060	RirG233390	RirG259330	RirG184060	RirG208380	RirG220390	RirG223580	RirG167690	RirG160000	RirG242350	RirG229290	RirG183410	RirG234970	RirG128710	RirG202590	RirG115310	RirG129660	RirG229460	RirG254630	RirG235400	RirG151500	RirG236540	RirG236800	RirG223330	RirG234840	RirG149910	RirG259010	RirG115450	RirG235130	RirG201150	RirG255380	RirG195930	RirG171370	RirG196000	RirG190660	RirG121430	RirG229450	RirG185340	RirG270420	RirG201780
8	361	8_2	28
				rir:28	RirG111500	RirG202620	RirG198530	RirG227300	RirG145990	RirG168060	RirG221280	RirG179050	RirG200090	RirG110750	RirG273720	RirG255070	RirG172740	RirG254110	RirG193820	RirG252150	RirG172090	RirG265100	RirG254030	RirG112330	RirG191070	RirG064370	RirG064430	RirG105310	RirG020860	RirG044620	RirG043050	RirG060790
8	361	8_3	25
				rir:25	RirG173190	RirG204880	RirG268500	RirG121890	RirG113990	RirG259110	RirG208410	RirG254180	RirG236500	RirG176590	RirG248480	RirG193840	RirG168190	RirG126010	RirG140890	RirG109610	RirG025500	RirG051500	RirG045280	RirG152350	RirG050870	RirG109640	RirG050940	RirG109600	RirG009930
8	361	8_4	21
				rir:21	RirG016400	RirG081610	RirG205500	RirG205510	RirG081620	RirG205530	RirG016410	RirG151540	RirG230460	RirG201460	RirG143170	RirG201470	RirG124430	RirG189670	RirG098660	RirG085140	RirG196650	RirG071720	RirG264810	RirG198810	RirG000890
8	361	8_5	19
				rir:19	RirG239900	RirG161020	RirG269970	RirG218550	RirG108230	RirG103630	RirG176710	RirG105730	RirG109090	RirG223340	RirG270880	RirG083240	RirG235180	RirG223530	RirG075740	RirG028800	RirG065150	RirG019580	RirG016660
8	361	8_6	18
				rir:18	RirG239550	RirG121680	RirG202580	RirG254020	RirG221820	RirG141860	RirG236530	RirG171990	RirG188560	RirG115640	RirG100680	RirG254620	RirG088340	RirG086350	RirG056690	RirG014770	RirG045260	RirG057970
8	361	8_7	18
				rir:18	RirG235110	RirG033500	RirG139450	RirG141850	RirG196010	RirG192520	RirG150250	RirG082280	RirG099780	RirG139070	RirG141050	RirG176600	RirG239330	RirG163190	RirG111990	RirG068790	RirG071480	RirG003790
8	361	8_8	18
				rir:18	RirG252500	RirG140520	RirG137880	RirG206420	RirG236950	RirG121880	RirG236930	RirG266330	RirG126110	RirG168330	RirG110900	RirG237010	RirG216270	RirG217390	RirG217280	RirG036420	RirG051050	RirG016260
8	361	8_9	17
				rir:17	RirG180930	RirG241010	RirG235120	RirG239660	RirG254600	RirG181260	RirG229280	RirG194160	RirG216310	RirG188760	RirG121670	RirG169660	RirG144360	RirG103390	RirG000500	RirG004320	RirG030120
8	361	8_10	17
				rir:17	RirG269980	RirG235390	RirG227340	RirG189460	RirG141190	RirG199410	RirG197100	RirG178230	RirG189630	RirG173310	RirG081630	RirG063760	RirG198600	RirG178220	RirG021270	RirG029220	RirG099490
8	361	8_11	17
				rir:17	RirG201800	RirG238990	RirG103170	RirG204980	RirG201490	RirG021330	RirG239780	RirG189610	RirG011680	RirG054130	RirG077020	RirG141750	RirG010260	RirG095350	RirG008300	RirG016480	RirG001410
8	361	8_12	16
				rir:16	RirG204310	RirG120500	RirG144370	RirG273710	RirG248540	RirG188770	RirG184880	RirG115630	RirG128390	RirG248370	RirG249850	RirG223560	RirG256210	RirG157940	RirG051470	RirG070560
8	361	8_13	14
				rir:14	RirG074080	RirG136320	RirG193420	RirG180140	RirG144720	RirG105830	RirG252380	RirG259050	RirG060760	RirG060770	RirG073850	RirG035760	RirG049040	RirG006740
8	361	8_14	14
				rir:14	RirG254040	RirG117830	RirG179440	RirG145590	RirG216510	RirG241410	RirG230430	RirG236810	RirG120100	RirG152470	RirG209910	RirG150330	RirG032290	RirG051620
8	361	8_15	13
				rir:13	RirG185270	RirG151520	RirG171930	RirG265110	RirG112300	RirG193830	RirG248510	RirG155570	RirG117510	RirG165290	RirG079830	RirG084390	RirG071680
8	361	8_16	9
				rir:9	RirG029400	RirG226110	RirG069970	RirG239560	RirG237130	RirG225610	RirG239670	RirG119890	RirG026970
8	361	8_17	6
				rir:6	RirG202370	RirG201890	RirG138340	RirG114630	RirG114650	RirG175980
8	361	8_18	6
				rir:6	RirG010430	RirG204990	RirG235160	RirG273690	RirG109660	RirG007450
8	361	8_19	4
				rir:4	RirG145700	RirG103650	RirG066210	RirG024420
8	361	8_20	3
				rir:3	RirG138540	RirG108510	RirG235170
8	361	8_21	3
				rir:3	RirG265560	RirG241160	RirG216840
8	361	8_22	3
				rir:3	RirG002070	RirG086360	RirG140630
8	361	8_23	3
				rir:3	RirG003570	RirG183110	RirG268140
8	361	8_24	2
				rir:2	RirG254060	RirG121910
8	361	8_25	2
				rir:2	RirG160680	RirG058130
8	361	8_26	2
				rir:2	RirG109570	RirG115440
8	361	8_27	2
				rir:2	RirG058690	RirG083480
9	352	9_1	126
				rir:126	RirG108900	RirG108910	RirG230390	RirG165770	RirG110880	RirG171640	RirG205710	RirG211880	RirG205740	RirG139060	RirG204190	RirG205750	RirG219140	RirG206390	RirG152670	RirG245260	RirG255080	RirG188330	RirG268700	RirG248750	RirG268740	RirG205790	RirG240890	RirG268770	RirG201560	RirG175940	RirG218930	RirG148990	RirG230340	RirG224010	RirG179400	RirG244240	RirG230360	RirG224060	RirG244230	RirG205780	RirG221720	RirG268760	RirG179410	RirG152680	RirG269650	RirG115250	RirG240910	RirG177660	RirG210220
9	352	9_2	97
				rir:97	RirG147980	RirG154890	RirG230370	RirG109510	RirG264800	RirG154600	RirG145270	RirG151450	RirG226330	RirG136760	RirG115610	RirG270780	RirG105110	RirG115620	RirG172340	RirG247600	RirG050050	RirG218790	RirG172330	RirG189300	RirG247510	RirG129210	RirG082230	RirG095840	RirG115600	RirG141170	RirG251150	RirG119670	RirG205600	RirG145280	RirG240410	RirG221400	RirG145300	RirG156690	RirG205590	RirG183710	RirG111450	RirG145290	RirG069580	RirG116410	RirG185920	RirG145310	RirG143260	RirG191480	RirG215240
9	352	9_3	33
				rir:33	RirG250070	RirG254470	RirG271470	RirG270520	RirG248520	RirG208460	RirG079110	RirG097560	RirG180960	RirG218510	RirG205120	RirG168150	RirG101160	RirG247650	RirG184820	RirG244060	RirG112010	RirG106600	RirG108700	RirG180950	RirG250000	RirG076940	RirG249990	RirG246530	RirG180970	RirG180980	RirG250010	RirG135640	RirG008760	RirG045910	RirG068630	RirG004340	RirG008070
9	352	9_4	26
				rir:26	RirG120120	RirG137730	RirG128000	RirG128010	RirG080370	RirG209240	RirG223570	RirG168720	RirG045220	RirG123450	RirG260430	RirG028680	RirG013650	RirG037790	RirG037800	RirG270530	RirG201620	RirG078330	RirG020530	RirG055010	RirG260420	RirG007630	RirG035110	RirG223300	RirG019920	RirG247700
9	352	9_5	12
				rir:12	RirG127690	RirG094640	RirG235930	RirG149070	RirG240140	RirG114310	RirG240130	RirG153680	RirG214890	RirG151860	RirG114320	RirG240120
9	352	9_6	11
				rir:11	RirG182020	RirG144940	RirG205580	RirG141730	RirG119020	RirG119040	RirG240350	RirG169940	RirG269300	RirG240360	RirG087380
9	352	9_7	8
				rir:8	RirG141740	RirG137720	RirG227880	RirG136490	RirG236200	RirG054530	RirG227870	RirG022590
9	352	9_8	7
				rir:7	RirG260450	RirG086640	RirG111470	RirG180870	RirG185320	RirG080130	RirG229430
9	352	9_9	7
				rir:7	RirG147650	RirG181850	RirG047660	RirG100440	RirG083860	RirG038040	RirG013950
9	352	9_10	6
				rir:6	RirG109720	RirG035570	RirG030170	RirG015240	RirG020030	RirG047340
9	352	9_11	4
				rir:4	RirG229900	RirG095870	RirG272900	RirG180860
9	352	9_12	4
				rir:4	RirG064280	RirG149060	RirG090450	RirG006510
9	352	9_13	3
				rir:3	RirG205150	RirG146000	RirG209220
9	352	9_14	2
				rir:2	RirG071010	RirG240900
9	352	9_15	2
				rir:2	RirG064520	RirG116260
9	352	9_16	2
				rir:2	RirG116390	RirG021320
9	352	9_17	2
				rir:2	RirG043680	RirG037810
10	317	10_1	46
				mob:46	fgenesh2_pg.scaffold_10000133	fgenesh2_pg.scaffold_16000026	estExt_fgenesh2_pg.C_160026	estExt_fgenesh1_pg.C_160022	fgenesh1_pg.scaffold_16000023	fgenesh2_pg.scaffold_57000002	estExt_fgenesh2_pg.C_570002	fgenesh2_pg.scaffold_49000035	fgenesh1_pg.scaffold_57000001	estExt_fgenesh1_pg.C_570001	fgenesh2_pg.scaffold_51000006	fgenesh1_pg.scaffold_49000026	fgenesh1_pg.scaffold_51000007	fgenesh2_pg.scaffold_10000001	fgenesh2_pg.scaffold_51000017	fgenesh2_pg.scaffold_2000001	fgenesh2_pg.scaffold_57000007	fgenesh2_pg.scaffold_27000108	fgenesh1_pg.scaffold_49000010	estExt_fgenesh1_pg.C_410031	fgenesh1_pg.scaffold_51000002	estExt_fgenesh1_pg.C_510002	fgenesh1_pg.scaffold_41000032	fgenesh1_pg.scaffold_42000014	fgenesh1_pg.scaffold_49000014	estExt_fgenesh1_pg.C_490014	fgenesh1_pg.scaffold_30000026	estExt_fgenesh1_pg.C_300026	fgenesh2_pg.scaffold_26000101	estExt_fgenesh2_pg.C_260101	fgenesh1_pg.scaffold_26000103	estExt_fgenesh1_pg.C_260103	fgenesh1_pg.scaffold_39000048	fgenesh1_pg.scaffold_27000099	fgenesh1_pg.scaffold_42000003	estExt_fgenesh1_pg.C_420003	fgenesh2_pg.scaffold_41000035	fgenesh1_pg.scaffold_57000003	fgenesh2_pg.scaffold_44000019	fgenesh1_pg.scaffold_51000004	fgenesh1_pg.scaffold_27000027	fgenesh2_pg.scaffold_51000003	estExt_fgenesh2_pg.C_240051	fgenesh2_pg.scaffold_44000020	fgenesh1_pg.scaffold_24000048
10	317	10_2	36
				mob:36	fgenesh1_pg.scaffold_22000112	fgenesh2_pg.scaffold_39000053	fgenesh2_pg.scaffold_22000118	fgenesh2_pg.scaffold_42000003	fgenesh2_pg.scaffold_24000051	fgenesh2_pg.scaffold_42000013	fgenesh2_pg.scaffold_25000010	fgenesh1_pg.scaffold_25000006	fgenesh1_pg.scaffold_10000114	fgenesh2_pg.scaffold_49000009	estExt_fgenesh2_pg.C_490009	fgenesh2_pg.scaffold_49000002	fgenesh2_pg.scaffold_3000613	estExt_fgenesh2_pg.C_30611	fgenesh1_pg.scaffold_49000002	fgenesh2_pg.scaffold_49000027	estExt_fgenesh2_pg.C_490027	fgenesh1_pg.scaffold_30000029	estExt_fgenesh1_pg.C_300029	fgenesh2_pg.scaffold_30000031	estExt_fgenesh2_pg.C_300031	fgenesh2_pg.scaffold_46000001	fgenesh1_pg.scaffold_46000001	fgenesh2_pg.scaffold_2000435	estExt_fgenesh2_pg.C_20433	fgenesh2_pg.scaffold_49000020	fgenesh2_pg.scaffold_49000015	fgenesh2_pg.scaffold_10000160	fgenesh2_pg.scaffold_39000037	fgenesh2_pg.scaffold_30000028	fgenesh2_pg.scaffold_51000002	estExt_fgenesh2_pg.C_510002	estExt_fgenesh2_pg.C_420003	fgenesh2_pg.scaffold_27000027	fgenesh2_pg.scaffold_11000003	estExt_fgenesh1_pg.C_240048
10	317	10_3	28
				bad:1	BDEG_01977
				mob:27	fgenesh2_pg.scaffold_14000231	fgenesh1_pg.scaffold_43000064	fgenesh1_pg.scaffold_44000017	fgenesh1_pg.scaffold_59000001	fgenesh1_pg.scaffold_27000037	fgenesh1_pg.scaffold_66000001	fgenesh2_pg.scaffold_44000018	estExt_fgenesh1_pg.C_570003	fgenesh1_pg.scaffold_76000001	fgenesh1_pg.scaffold_14000004	fgenesh2_pg.scaffold_34000005	fgenesh1_pg.scaffold_10000002	fgenesh1_pg.scaffold_51000005	fgenesh2_pg.scaffold_38000046	fgenesh2_pg.scaffold_38000045	fgenesh2_pg.scaffold_34000003	fgenesh2_pg.scaffold_50000001	estExt_fgenesh2_pg.C_410035	fgenesh2_pg.scaffold_27000038	fgenesh1_pg.scaffold_80000001	fgenesh1_pg.scaffold_29000001	fgenesh1_pg.scaffold_18000145	estExt_fgenesh2_pg.C_140002	fgenesh2_pg.scaffold_51000009	fgenesh2_pg.scaffold_30000032	fgenesh2_pg.scaffold_44000015	fgenesh2_pg.scaffold_41000033
10	317	10_4	22
				mob:22	e_gw1.6.125.1	gw1.6.125.1	fgenesh1_pg.scaffold_82000001	fgenesh2_pg.scaffold_72000001	fgenesh1_pg.scaffold_12000002	fgenesh2_pg.scaffold_291000001	fgenesh2_pg.scaffold_25000004	fgenesh2_pg.scaffold_55000001	fgenesh2_pg.scaffold_115000002	fgenesh2_pg.scaffold_15000245	fgenesh1_pg.scaffold_291000001	fgenesh2_pg.scaffold_11000004	fgenesh1_pg.scaffold_27000106	fgenesh2_pg.scaffold_6000003	fgenesh1_pg.scaffold_24000002	fgenesh1_pg.scaffold_14000003	fgenesh2_pg.scaffold_2000437	fgenesh2_pg.scaffold_8000002	fgenesh2_pg.scaffold_55000005	estExt_fgenesh1_pg.C_240002	estExt_fgenesh2_pg.C_130002	estExt_fgenesh2_pg.C_550005
10	317	10_5	17
				mob:17	gw1.6.258.1	e_gw1.6.258.1	e_gw1.6.210.1	fgenesh2_pg.scaffold_9000002	fgenesh2_pg.scaffold_13000002	fgenesh1_pg.scaffold_15000220	fgenesh2_pg.scaffold_30000009	fgenesh2_pg.scaffold_5000002	fgenesh2_pg.scaffold_24000132	fgenesh2_pg.scaffold_55000003	fgenesh1_pg.scaffold_27000005	fgenesh2_pg.scaffold_30000001	fgenesh2_pg.scaffold_18000165	fgenesh2_pg.scaffold_45000050	fgenesh2_pg.scaffold_80000001	estExt_fgenesh2_pg.C_550003	estExt_fgenesh1_pg.C_270005
10	317	10_6	16
				mob:16	fgenesh1_pg.scaffold_55000004	fgenesh2_pg.scaffold_82000001	fgenesh2_pg.scaffold_39000003	fgenesh1_pg.scaffold_50000002	fgenesh1_pg.scaffold_36000001	fgenesh2_pg.scaffold_46000017	fgenesh2_pg.scaffold_27000005	fgenesh2_pg.scaffold_11000002	fgenesh2_pg.scaffold_46000015	fgenesh2_pg.scaffold_6000359	estExt_fgenesh1_pg.C_500002	estExt_fgenesh2_pg.C_270005	fgenesh2_pg.scaffold_5000005	estExt_gwp_gw1.C_20002	estExt_gwp_gw1.C_20001	estExt_Genewise1.C_20002
10	317	10_7	10
				mob:10	estExt_fgenesh1_pg.C_20418	fgenesh1_pg.scaffold_2000423	fgenesh2_pg.scaffold_51000014	fgenesh2_pg.scaffold_26000022	fgenesh1_pg.scaffold_26000023	fgenesh2_pg.scaffold_30000003	fgenesh1_pg.scaffold_30000002	fgenesh2_pg.scaffold_44000024	fgenesh1_pg.scaffold_10000155	fgenesh1_pg.scaffold_26000061
10	317	10_8	9
				mob:9	fgenesh2_pg.scaffold_51000008	estExt_fgenesh2_pg.C_510008	fgenesh1_pg.scaffold_76000002	fgenesh2_pg.scaffold_51000005	fgenesh2_pg.scaffold_27000040	fgenesh2_pg.scaffold_76000001	fgenesh2_pg.scaffold_26000059	fgenesh2_pg.scaffold_18000163	fgenesh1_pg.scaffold_21000004
10	317	10_9	8
				mob:8	fgenesh2_pg.scaffold_65000004	fgenesh2_pg.scaffold_24000135	fgenesh2_pg.scaffold_54000010	estExt_fgenesh1_pg.C_550004	e_gw1.6.233.1	gw1.6.233.1	e_gw1.2.818.1	e_gw1.2.838.1
10	317	10_10	7
				mob:7	fgenesh2_pg.scaffold_44000025	fgenesh2_pg.scaffold_59000001	fgenesh2_pg.scaffold_66000001	fgenesh2_pg.scaffold_59000003	fgenesh2_pg.scaffold_51000011	estExt_fgenesh2_pg.C_510011	fgenesh1_pg.scaffold_34000003
10	317	10_11	6
				mob:6	fgenesh2_pg.scaffold_24000004	fgenesh2_pg.scaffold_21000001	fgenesh2_pg.scaffold_24000003	fgenesh2_pg.scaffold_14000002	estExt_fgenesh2_pg.C_240004	estExt_fgenesh2_pg.C_240132
10	317	10_12	5
				mob:5	fgenesh2_pg.scaffold_10000204	fgenesh2_pg.scaffold_30000030	fgenesh2_pg.scaffold_10000205	fgenesh2_pg.scaffold_12000002	estExt_fgenesh2_pg.C_100204
10	317	10_13	5
				mob:5	fgenesh1_pg.scaffold_30000015	fgenesh2_pg.scaffold_30000016	estExt_fgenesh1_pg.C_300015	estExt_fgenesh2_pg.C_300016	fgenesh2_pg.scaffold_7000314
10	317	10_14	5
				mob:5	fgenesh2_pg.scaffold_36000001	fgenesh1_pg.scaffold_27000003	fgenesh2_pg.scaffold_18000164	estExt_fgenesh2_pg.C_460017	fgenesh2_pg.scaffold_29000001
10	317	10_15	5
				mob:5	fgenesh2_pg.scaffold_30000002	fgenesh2_pg.scaffold_10000161	estExt_fgenesh2_pg.C_300002	estExt_Genewise1.C_20001	estExt_fgenesh2_pg.C_100161
10	317	10_16	5
				mob:5	fgenesh2_pg.scaffold_10000115	fgenesh1_pg.scaffold_51000001	fgenesh2_pg.scaffold_51000001	estExt_fgenesh2_pg.C_80280	fgenesh2_pg.scaffold_8000285
10	317	10_17	5
				mob:5	fgenesh2_pg.scaffold_44000016	estExt_fgenesh2_pg.C_440016	fgenesh1_pg.scaffold_2000001	fgenesh1_pg.scaffold_49000019	estExt_fgenesh1_pg.C_490019
10	317	10_18	5
				mob:5	fgenesh1_pg.scaffold_44000015	fgenesh2_pg.scaffold_51000010	estExt_fgenesh2_pg.C_510010	fgenesh1_pg.scaffold_5000005	fgenesh2_pg.scaffold_5000008
10	317	10_19	4
				mob:4	fgenesh1_pg.scaffold_49000006	fgenesh2_pg.scaffold_49000007	estExt_fgenesh2_pg.C_490007	estExt_fgenesh1_pg.C_490006
10	317	10_20	4
				mob:4	fgenesh2_pg.scaffold_10000247	fgenesh2_pg.scaffold_77000001	fgenesh2_pg.scaffold_27000004	estExt_fgenesh2_pg.C_100247
10	317	10_21	4
				mob:4	fgenesh2_pg.scaffold_44000021	fgenesh2_pg.scaffold_51000004	fgenesh2_pg.scaffold_49000012	fgenesh2_pg.scaffold_51000013
10	317	10_22	4
				mob:4	fgenesh2_pg.scaffold_21000052	estExt_fgenesh2_pg.C_210051	fgenesh1_pg.scaffold_49000008	estExt_fgenesh1_pg.C_490008
10	317	10_23	3
				mob:3	estExt_fgenesh1_pg.C_100129	fgenesh1_pg.scaffold_10000129	fgenesh1_pg.scaffold_39000034
10	317	10_24	3
				mob:3	fgenesh2_pg.scaffold_51000007	fgenesh1_pg.scaffold_21000050	estExt_fgenesh1_pg.C_210049
10	317	10_25	3
				mob:3	fgenesh2_pg.scaffold_59000002	gw1.2.818.1	gw1.2.838.1
10	317	10_26	2
				mob:2	fgenesh2_pg.scaffold_6000028	estExt_fgenesh2_pg.C_60028
10	317	10_27	2
				mob:2	fgenesh2_pg.scaffold_10000206	estExt_fgenesh2_pg.C_100206
10	317	10_28	2
				mob:2	fgenesh1_pg.scaffold_30000028	fgenesh2_pg.scaffold_65000003
10	317	10_29	2
				mob:2	fgenesh1_pg.scaffold_51000006	estExt_fgenesh1_pg.C_510006
10	317	10_30	2
				mob:2	fgenesh1_pg.scaffold_6000003	estExt_fgenesh2_pg.C_110004
10	317	10_31	2
				mob:2	fgenesh2_pg.scaffold_38000004	fgenesh2_pg.scaffold_5000353
10	317	10_32	2
				mob:2	fgenesh2_pg.scaffold_17000165	estExt_fgenesh2_pg.C_170162
10	317	10_33	2
				mob:2	fgenesh1_pg.scaffold_9000002	fgenesh2_pg.scaffold_43000065
10	317	10_34	2
				mob:2	fgenesh1_pg.scaffold_6000023	estExt_fgenesh1_pg.C_60023
10	317	10_35	2
				mob:2	fgenesh1_pg.scaffold_21000001	estExt_fgenesh1_pg.C_210001
10	317	10_36	2
				mob:2	fgenesh2_pg.scaffold_24000134	fgenesh2_pg.scaffold_10000003
10	317	10_37	2
				mob:2	fgenesh2_pg.scaffold_41000037	fgenesh2_pg.scaffold_44000022
10	317	10_38	2
				mob:2	fgenesh2_pg.scaffold_10000134	estExt_fgenesh2_pg.C_100134
10	317	10_39	2
				mob:2	estExt_fgenesh2_pg.C_570007	fgenesh2_pg.scaffold_44000023
10	317	10_40	2
				mob:2	fgenesh2_pg.scaffold_92000001	fgenesh1_pg.scaffold_92000001
10	317	10_41	2
				mob:2	fgenesh1_pg.scaffold_8000283	estExt_fgenesh1_pg.C_80279
10	317	10_42	2
				mob:2	fgenesh1_pg.scaffold_7000305	estExt_fgenesh1_pg.C_70303
10	317	10_43	2
				mob:2	fgenesh1_pg.scaffold_41000033	estExt_fgenesh1_pg.C_410032
10	317	10_44	2
				mob:2	fgenesh1_pg.scaffold_11000001	estExt_fgenesh1_pg.C_110001
10	317	10_45	2
				mob:2	estExt_fgenesh1_pg.C_100196	fgenesh1_pg.scaffold_10000196
10	317	10_46	2
				mob:2	fgenesh1_pg.scaffold_3000616	estExt_fgenesh1_pg.C_30612
10	317	10_47	2
				mob:2	fgenesh1_pg.scaffold_44000014	estExt_fgenesh1_pg.C_440014
10	317	10_48	2
				mob:2	fgenesh2_pg.scaffold_38000044	estExt_fgenesh2_pg.C_380044
10	317	10_49	2
				mob:2	fgenesh1_pg.scaffold_38000042	estExt_fgenesh1_pg.C_380042
10	317	10_50	2
				mob:2	fgenesh2_pg.scaffold_21000004	estExt_fgenesh2_pg.C_210004
10	317	10_51	2
				mob:2	fgenesh2_pg.scaffold_55000004	estExt_fgenesh2_pg.C_550004
11	302	11_1	175
				rir:175	RirG236610	RirG148230	RirG175550	RirG175570	RirG158930	RirG259960	RirG224450	RirG244010	RirG220470	RirG220900	RirG215630	RirG259990	RirG239530	RirG159780	RirG248630	RirG163000	RirG236630	RirG198220	RirG218770	RirG215180	RirG265810	RirG221270	RirG202640	RirG260030	RirG165150	RirG183860	RirG244050	RirG262510	RirG192830	RirG223140	RirG219090	RirG183840	RirG202660	RirG211270	RirG158940	RirG149120	RirG248700	RirG241800	RirG233810	RirG204610	RirG181740	RirG202650	RirG173080	RirG248690	RirG227360
11	302	11_2	25
				rir:25	RirG196400	RirG216990	RirG221310	RirG175100	RirG258960	RirG215650	RirG188420	RirG223150	RirG184530	RirG150570	RirG239300	RirG272830	RirG250460	RirG241770	RirG199500	RirG202750	RirG122160	RirG138130	RirG048730	RirG121040	RirG014700	RirG115500	RirG107580	RirG104160	RirG014650
11	302	11_3	24
				rir:24	RirG115580	RirG049050	RirG113070	RirG241780	RirG179100	RirG029360	RirG113080	RirG170710	RirG199690	RirG155290	RirG205560	RirG072250	RirG173170	RirG100600	RirG183130	RirG193690	RirG150850	RirG054310	RirG007790	RirG233900	RirG018200	RirG253820	RirG034020	RirG211060
11	302	11_4	21
				rir:21	RirG256380	RirG272780	RirG236600	RirG211050	RirG139420	RirG029020	RirG145960	RirG099770	RirG088820	RirG054990	RirG206240	RirG233910	RirG127720	RirG165120	RirG250700	RirG259780	RirG219840	RirG244080	RirG226280	RirG199680	RirG007780
11	302	11_5	14
				rir:14	RirG167510	RirG236590	RirG272770	RirG165800	RirG247040	RirG250690	RirG180270	RirG145970	RirG215860	RirG185940	RirG247480	RirG029010	RirG055000	RirG226270
11	302	11_6	11
				rir:11	RirG217000	RirG165110	RirG167530	RirG200940	RirG096970	RirG100280	RirG114690	RirG106380	RirG081350	RirG030150	RirG073990
11	302	11_7	11
				rir:11	RirG115490	RirG215260	RirG198700	RirG135400	RirG208910	RirG233890	RirG168200	RirG117260	RirG136810	RirG079640	RirG094850
11	302	11_8	7
				rir:7	RirG041430	RirG152850	RirG055130	RirG111150	RirG086500	RirG210290	RirG179220
11	302	11_9	4
				rir:4	RirG179380	RirG076140	RirG106390	RirG259770
11	302	11_10	3
				rir:3	RirG214700	RirG096180	RirG029370
11	302	11_11	3
				rir:3	RirG145980	RirG073120	RirG018190
11	302	11_12	2
				rir:2	RirG223470	RirG173210
11	302	11_13	2
				rir:2	RirG214810	RirG233830
12	300	12_1	49
				mob:49	gw1.7.61.1	e_gw1.7.61.1	gw1.7.183.1	e_gw1.7.183.1	gw1.7.216.1	gw1.7.192.1	e_gw1.7.216.1	e_gw1.7.192.1	e_gw1.7.162.1	e_gw1.6.202.1	e_gw1.6.178.1	e_gw1.6.126.1	gw1.6.202.1	gw1.6.178.1	gw1.6.126.1	gw1.5.273.1	gw1.5.206.1	gw1.5.166.1	e_gw1.5.273.1	e_gw1.5.206.1	e_gw1.5.166.1	fgenesh2_pg.scaffold_23000071	estExt_fgenesh2_pg.C_230071	estExt_fgenesh2_pm.C_150008	estExt_fgenesh2_pg.C_150120	fgenesh2_pm.scaffold_15000009	fgenesh2_pg.scaffold_15000121	fgenesh1_pg.scaffold_15000106	e_gw1.8.192.1	e_gw1.8.156.1	e_gw1.8.153.1	gw1.8.192.1	gw1.8.156.1	gw1.8.153.1	gw1.2.417.1	e_gw1.2.417.1	fgenesh2_pm.scaffold_8000001	fgenesh2_pg.scaffold_8000004	fgenesh1_pg.scaffold_8000002	estExt_fgenesh2_pm.C_80001	estExt_fgenesh2_pg.C_80004	fgenesh2_pm.scaffold_23000001	fgenesh2_pg.scaffold_23000007	fgenesh1_pg.scaffold_23000006	estExt_fgenesh1_pg.C_150105
12	300	12_2	28
				mob:28	fgenesh1_pg.scaffold_7000112	estExt_fgenesh2_pg.C_50128	fgenesh1_pg.scaffold_48000003	fgenesh1_pg.scaffold_8000003	fgenesh2_pg.scaffold_14000037	fgenesh1_pg.scaffold_2000528	e_gw1.4.391.1	gw1.4.391.1	gw1.2.871.1	e_gw1.2.871.1	e_gw1.2.864.1	fgenesh2_pg.scaffold_12000145	fgenesh1_pg.scaffold_12000130	gw1.2.864.1	fgenesh1_pg.scaffold_36000056	fgenesh2_pg.scaffold_28000088	fgenesh1_pg.scaffold_28000080	fgenesh2_pg.scaffold_22000085	fgenesh2_pg.scaffold_3000543	estExt_gwp_gw1.C_40161	estExt_Genewise1.C_40161	estExt_Genewise1.C_70076	estExt_gwp_gw1.C_70076	estExt_fgenesh1_pg.C_120130	estExt_fgenesh2_pg.C_120145	fgenesh1_pg.scaffold_303000001	fgenesh1_pg.scaffold_22000079	fgenesh1_pg.scaffold_4000263
12	300	12_3	25
				mob:25	e_gw1.4.388.1	gw1.4.388.1	estExt_fgenesh1_pg.C_310081	e_gw1.4.361.1	e_gw1.4.282.1	gw1.4.282.1	gw1.4.361.1	gw1.2.424.1	gw1.2.619.1	gw1.2.591.1	gw1.5.287.1	e_gw1.2.424.1	e_gw1.2.619.1	e_gw1.2.591.1	gw1.2.546.1	e_gw1.2.546.1	e_gw1.5.287.1	estExt_Genewise1.C_20092	estExt_gwp_gw1.C_20092	estExt_gwp_gw1.C_20094	estExt_Genewise1.C_20093	estExt_gwp_gw1.C_20093	estExt_Genewise1.C_20094	estExt_Genewise1.C_40160	estExt_Genewise1.C_40159
12	300	12_4	22
				mob:22	fgenesh2_pm.scaffold_7000018	fgenesh2_pg.scaffold_7000099	fgenesh1_pg.scaffold_7000113	gw1.7.162.1	fgenesh2_pm.scaffold_24000011	fgenesh2_pg.scaffold_24000130	fgenesh1_pg.scaffold_24000127	fgenesh2_pm.scaffold_24000010	fgenesh2_pg.scaffold_24000129	fgenesh1_pg.scaffold_24000126	e_gw1.3.505.1	gw1.3.505.1	e_gw1.3.473.1	e_gw1.3.464.1	gw1.3.473.1	gw1.3.464.1	gw1.2.605.1	gw1.2.443.1	gw1.2.436.1	e_gw1.2.605.1	e_gw1.2.443.1	e_gw1.2.436.1
12	300	12_5	20
				mob:20	fgenesh2_pg.scaffold_43000046	fgenesh2_pg.scaffold_38000048	fgenesh1_pg.scaffold_43000046	fgenesh1_pg.scaffold_38000044	gw1.7.4.1	fgenesh2_pm.scaffold_7000001	fgenesh2_pg.scaffold_7000002	fgenesh1_pg.scaffold_7000002	e_gw1.7.4.1	estExt_gwp_gw1.C_70003	estExt_gwp_gw1.C_70002	estExt_gwp_gw1.C_70001	estExt_Genewise1.C_70003	estExt_Genewise1.C_70002	estExt_Genewise1.C_70001	estExt_fgenesh2_pg.C_380048	estExt_fgenesh1_pg.C_380044	estExt_fgenesh2_pm.C_70001	estExt_fgenesh2_pg.C_70002	estExt_fgenesh1_pg.C_70002
12	300	12_6	19
				mob:19	fgenesh1_pg.scaffold_14000037	fgenesh1_pg.scaffold_32000020	fgenesh2_pg.scaffold_32000021	gw1.8.95.1	gw1.8.54.1	gw1.8.58.1	fgenesh2_pg.scaffold_11000055	fgenesh1_pg.scaffold_11000058	e_gw1.8.95.1	e_gw1.8.58.1	e_gw1.8.54.1	estExt_gwp_gw1.C_80001	estExt_Genewise1.C_80003	estExt_gwp_gw1.C_80003	estExt_gwp_gw1.C_80002	estExt_Genewise1.C_80002	estExt_Genewise1.C_80001	estExt_fgenesh1_pg.C_110058	estExt_fgenesh2_pg.C_110055
12	300	12_7	18
				mob:18	estExt_gwp_gw1.C_40160	estExt_gwp_gw1.C_40159	gw1.2.535.1	gw1.2.582.1	gw1.2.463.1	gw1.2.400.1	e_gw1.2.581.1	gw1.2.379.1	gw1.2.581.1	e_gw1.2.582.1	e_gw1.2.535.1	e_gw1.2.463.1	estExt_gwp_gw1.C_20534	estExt_gwp_gw1.C_20533	estExt_gwp_gw1.C_20532	estExt_Genewise1.C_20534	estExt_Genewise1.C_20533	estExt_Genewise1.C_20532
12	300	12_8	13
				mob:13	fgenesh2_pg.scaffold_6000211	fgenesh2_pg.scaffold_24000128	fgenesh2_pg.scaffold_5000129	fgenesh2_pg.scaffold_25000101	fgenesh1_pg.scaffold_25000085	fgenesh2_pg.scaffold_7000098	fgenesh2_pg.scaffold_9000181	fgenesh1_pg.scaffold_9000162	fgenesh1_pg.scaffold_24000125	estExt_fgenesh2_pg.C_90181	estExt_fgenesh1_pg.C_90161	estExt_fgenesh2_pg.C_250101	estExt_fgenesh1_pg.C_250084
12	300	12_9	10
				mob:10	gw1.2.428.1	gw1.2.420.1	e_gw1.2.428.1	e_gw1.2.420.1	estExt_gwp_gw1.C_20893	estExt_gwp_gw1.C_20892	estExt_Genewise1.C_20891	estExt_gwp_gw1.C_20891	estExt_Genewise1.C_20893	estExt_Genewise1.C_20892
12	300	12_10	8
				mob:8	fgenesh2_pg.scaffold_7000069	fgenesh1_pg.scaffold_7000073	fgenesh2_pg.scaffold_31000071	estExt_fgenesh2_pg.C_310071	fgenesh1_pg.scaffold_31000081	fgenesh2_pg.scaffold_4000269	estExt_fgenesh2_pg.C_70069	estExt_fgenesh1_pg.C_70073
12	300	12_11	8
				mob:8	fgenesh2_pg.scaffold_31000069	fgenesh1_pg.scaffold_31000079	fgenesh2_pg.scaffold_2000116	fgenesh1_pg.scaffold_2000115	estExt_fgenesh2_pg.C_20115	estExt_fgenesh1_pg.C_20114	fgenesh2_pg.scaffold_18000093	fgenesh1_pg.scaffold_18000086
12	300	12_12	7
				mob:7	fgenesh2_pg.scaffold_12000237	fgenesh1_pg.scaffold_12000222	fgenesh2_pg.scaffold_48000003	estExt_fgenesh1_pg.C_120222	estExt_fgenesh2_pg.C_120237	estExt_fgenesh1_pg.C_480003	estExt_fgenesh2_pg.C_480003
12	300	12_13	6
				mob:6	fgenesh2_pg.scaffold_9000076	fgenesh1_pg.scaffold_9000067	fgenesh2_pg.scaffold_36000009	fgenesh1_pg.scaffold_36000008	fgenesh2_pg.scaffold_9000077	fgenesh1_pg.scaffold_9000066
12	300	12_14	6
				mob:6	fgenesh2_pg.scaffold_14000105	fgenesh2_pg.scaffold_2000271	fgenesh1_pg.scaffold_2000271	fgenesh1_pg.scaffold_14000100	estExt_fgenesh2_pg.C_140105	estExt_fgenesh1_pg.C_140100
12	300	12_15	4
				mob:4	fgenesh1_pg.scaffold_17000027	fgenesh2_pg.scaffold_17000028	estExt_fgenesh1_pg.C_170027	estExt_fgenesh2_pg.C_170027
12	300	12_16	4
				mob:4	estExt_fgenesh1_pg.C_150098	fgenesh1_pg.scaffold_15000099	fgenesh2_pg.scaffold_15000114	estExt_fgenesh2_pg.C_150113
12	300	12_17	4
				mob:4	fgenesh2_pg.scaffold_37000074	fgenesh1_pg.scaffold_37000065	fgenesh2_pg.scaffold_37000073	estExt_fgenesh2_pg.C_370072
12	300	12_18	4
				mob:4	fgenesh1_pg.scaffold_2000508	fgenesh2_pg.scaffold_2000519	estExt_fgenesh1_pg.C_20501	estExt_fgenesh2_pg.C_20515
12	300	12_19	4
				mob:4	e_gw1.2.379.1	e_gw1.2.400.1	gw1.2.590.1	e_gw1.2.590.1
12	300	12_20	4
				mob:4	fgenesh1_pg.scaffold_2000496	fgenesh2_pg.scaffold_2000504	estExt_fgenesh2_pg.C_20500	estExt_fgenesh1_pg.C_20489
12	300	12_21	4
				mob:4	fgenesh2_pg.scaffold_4000132	fgenesh1_pg.scaffold_4000126	estExt_fgenesh2_pg.C_40130	estExt_fgenesh1_pg.C_40124
12	300	12_22	3
				mob:3	fgenesh2_pg.scaffold_8000056	estExt_fgenesh2_pg.C_80055	fgenesh1_pg.scaffold_8000054
12	300	12_23	2
				mob:2	fgenesh1_pg.scaffold_5000131	estExt_fgenesh1_pg.C_50129
12	300	12_24	2
				mob:2	e_gw1.7.233.1	gw1.7.233.1
12	300	12_25	2
				mob:2	e_gw1.7.349.1	gw1.7.349.1
12	300	12_26	2
				mob:2	fgenesh2_pg.scaffold_28000025	fgenesh1_pg.scaffold_28000022
12	300	12_27	2
				mob:2	fgenesh2_pg.scaffold_36000052	estExt_fgenesh2_pg.C_360052
12	300	12_28	2
				mob:2	fgenesh2_pg.scaffold_36000051	fgenesh1_pg.scaffold_36000054
12	300	12_29	2
				mob:2	estExt_fgenesh1_pg.C_170029	fgenesh1_pg.scaffold_17000029
12	300	12_30	2
				mob:2	fgenesh2_pg.scaffold_17000029	estExt_fgenesh2_pg.C_170028
12	300	12_31	2
				mob:2	fgenesh1_pg.scaffold_21000129	fgenesh2_pg.scaffold_21000121
12	300	12_32	2
				mob:2	estExt_fgenesh1_pg.C_80054	fgenesh1_pg.scaffold_8000055
12	300	12_33	2
				mob:2	fgenesh1_pg.scaffold_2000785	estExt_fgenesh1_pg.C_20776
12	300	12_34	2
				mob:2	fgenesh2_pg.scaffold_2000811	estExt_fgenesh2_pg.C_20806
12	300	12_35	2
				mob:2	fgenesh1_pg.scaffold_14000096	fgenesh2_pg.scaffold_14000101
12	300	12_36	2
				mob:2	fgenesh1_pg.scaffold_20000018	fgenesh2_pg.scaffold_20000020
12	300	12_37	2
				mob:2	fgenesh1_pg.scaffold_17000028	estExt_fgenesh1_pg.C_170028
13	296	13_1	87
				rir:87	RirG102980	RirG119850	RirG124610	RirG257120	RirG103180	RirG244110	RirG106350	RirG193200	RirG180640	RirG145070	RirG146900	RirG213580	RirG259090	RirG163170	RirG233550	RirG236370	RirG110800	RirG243630	RirG254400	RirG202980	RirG254420	RirG192230	RirG205290	RirG192210	RirG208740	RirG205280	RirG220410	RirG192180	RirG202990	RirG236380	RirG125120	RirG188300	RirG192220	RirG250090	RirG218610	RirG123550	RirG155420	RirG236570	RirG139040	RirG213220	RirG121240	RirG121250	RirG247490	RirG220170	RirG233870
13	296	13_2	85
				rir:85	RirG144950	RirG241270	RirG142320	RirG145690	RirG258320	RirG211000	RirG205430	RirG142180	RirG143690	RirG089510	RirG174550	RirG144500	RirG089500	RirG246510	RirG095230	RirG249060	RirG103260	RirG158030	RirG248970	RirG203320	RirG211010	RirG146100	RirG089520	RirG210990	RirG205410	RirG248990	RirG146060	RirG116180	RirG085670	RirG190730	RirG213700	RirG104350	RirG241320	RirG191500	RirG248980	RirG234940	RirG267220	RirG241330	RirG191490	RirG101970	RirG215740	RirG163890	RirG183020	RirG163900	RirG211030
13	296	13_3	38
				rir:38	RirG241760	RirG157240	RirG086710	RirG157290	RirG174500	RirG158080	RirG161690	RirG234800	RirG082630	RirG143720	RirG264860	RirG259860	RirG256950	RirG109040	RirG174510	RirG129690	RirG242610	RirG175090	RirG235830	RirG241730	RirG217350	RirG224990	RirG174540	RirG216550	RirG168340	RirG237940	RirG272160	RirG189020	RirG222400	RirG178120	RirG256940	RirG106650	RirG114120	RirG204910	RirG073910	RirG039790	RirG047580	RirG014820
13	296	13_4	27
				rir:27	RirG204770	RirG181230	RirG264540	RirG048360	RirG174630	RirG103420	RirG045560	RirG104340	RirG072970	RirG086700	RirG250040	RirG234270	RirG240760	RirG135230	RirG237670	RirG239440	RirG029660	RirG144450	RirG086720	RirG134520	RirG246000	RirG240020	RirG025330	RirG054020	RirG069070	RirG060900	RirG010890
13	296	13_5	11
				rir:11	RirG104990	RirG105010	RirG115390	RirG205270	RirG207030	RirG254520	RirG218800	RirG143120	RirG100460	RirG149790	RirG148520
13	296	13_6	10
				rir:10	RirG190100	RirG179690	RirG233130	RirG089600	RirG159000	RirG041100	RirG249000	RirG106300	RirG148320	RirG072660
13	296	13_7	7
				rir:7	RirG264890	RirG262350	RirG205840	RirG192370	RirG148200	RirG007710	RirG019950
13	296	13_8	6
				rir:6	RirG215660	RirG025480	RirG066570	RirG035730	RirG138060	RirG221360
13	296	13_9	5
				rir:5	RirG149210	RirG137310	RirG137300	RirG188900	RirG137260
13	296	13_10	4
				rir:4	RirG163160	RirG213920	RirG172570	RirG144440
13	296	13_11	3
				rir:3	RirG209450	RirG049270	RirG003260
13	296	13_12	3
				rir:3	RirG161680	RirG171620	RirG237950
13	296	13_13	2
				rir:2	RirG206740	RirG246680
13	296	13_14	2
				rir:2	RirG118110	RirG213260
13	296	13_15	2
				rir:2	RirG152970	RirG035870
13	296	13_16	2
				rir:2	RirG202790	RirG188890
13	296	13_17	2
				rir:2	RirG120900	RirG149200
14	291	14_1	110
				rir:110	RirG253540	RirG153090	RirG235100	RirG273580	RirG273550	RirG228570	RirG224680	RirG144870	RirG166380	RirG176840	RirG261320	RirG183280	RirG139750	RirG217540	RirG233210	RirG180790	RirG135260	RirG270980	RirG270990	RirG271020	RirG139080	RirG224640	RirG208760	RirG236260	RirG121140	RirG136040	RirG233260	RirG237850	RirG269540	RirG233280	RirG237140	RirG233230	RirG209920	RirG215160	RirG224690	RirG161000	RirG233450	RirG126460	RirG119820	RirG160660	RirG153880	RirG235010	RirG261310	RirG162640	RirG137490
14	291	14_2	39
				rir:39	RirG235410	RirG236920	RirG224630	RirG114580	RirG270670	RirG272970	RirG155160	RirG239220	RirG138310	RirG155140	RirG160780	RirG241480	RirG207480	RirG235460	RirG208750	RirG248610	RirG271050	RirG207460	RirG183680	RirG144860	RirG193750	RirG166290	RirG270800	RirG124170	RirG071150	RirG070780	RirG080730	RirG071210	RirG079300	RirG080720	RirG071430	RirG096660	RirG067460	RirG020710	RirG045210	RirG067430	RirG042100	RirG048280	RirG045240
14	291	14_3	27
				rir:27	RirG200740	RirG173750	RirG162710	RirG046930	RirG235200	RirG141560	RirG206380	RirG208110	RirG162770	RirG195770	RirG035160	RirG103440	RirG069300	RirG051430	RirG162790	RirG026640	RirG176770	RirG190500	RirG069750	RirG162700	RirG162760	RirG114020	RirG022580	RirG030800	RirG002690	RirG022530	RirG030600
14	291	14_4	23
				rir:23	RirG189640	RirG180750	RirG208960	RirG105300	RirG200710	RirG168160	RirG109590	RirG209020	RirG271040	RirG171910	RirG215150	RirG136150	RirG122100	RirG193180	RirG140960	RirG159360	RirG200080	RirG071470	RirG045250	RirG048260	RirG045230	RirG025120	RirG005550
14	291	14_5	19
				rir:19	RirG245340	RirG240550	RirG232450	RirG248490	RirG220240	RirG140910	RirG120180	RirG074820	RirG209000	RirG209010	RirG223890	RirG261340	RirG204290	RirG065380	RirG074790	RirG056250	RirG056200	RirG270660	RirG001880
14	291	14_6	15
				rir:15	RirG261710	RirG239360	RirG162460	RirG183300	RirG244390	RirG205240	RirG120610	RirG176870	RirG114590	RirG256260	RirG143310	RirG162290	RirG025160	RirG025130	RirG022310
14	291	14_7	10
				rir:10	RirG135500	RirG208970	RirG233220	RirG233200	RirG155150	RirG267710	RirG214180	RirG018340	RirG045200	RirG151160
14	291	14_8	8
				rir:8	RirG016310	RirG050850	RirG109650	RirG050860	RirG137010	RirG150430	RirG189660	RirG064290
14	291	14_9	7
				rir:7	RirG190480	RirG155560	RirG255030	RirG143180	RirG165240	RirG167900	RirG176040
14	291	14_10	7
				rir:7	RirG178680	RirG166270	RirG160650	RirG273370	RirG167910	RirG151880	RirG111750
14	291	14_11	7
				rir:7	RirG272400	RirG261980	RirG069150	RirG172720	RirG147400	RirG105890	RirG131340
14	291	14_12	4
				rir:4	RirG248600	RirG026710	RirG188050	RirG122830
14	291	14_13	4
				rir:4	RirG162780	RirG147430	RirG235190	RirG022570
14	291	14_14	4
				rir:4	RirG270640	RirG142690	RirG180730	RirG205170
14	291	14_15	3
				rir:3	RirG231310	RirG208140	RirG033770
14	291	14_16	2
				rir:2	RirG160640	RirG151870
14	291	14_17	2
				rir:2	RirG067440	RirG162690
15	278	15_1	29
				rir:29	RirG231900	RirG255650	RirG135030	RirG139000	RirG176950	RirG198100	RirG182770	RirG247250	RirG196060	RirG210850	RirG252530	RirG182170	RirG166860	RirG201380	RirG084650	RirG119240	RirG096160	RirG089350	RirG123770	RirG120760	RirG085490	RirG133410	RirG066420	RirG068080	RirG079900	RirG054660	RirG055880	RirG057100	RirG052160
15	278	15_2	27
				rir:27	RirG144800	RirG131470	RirG069930	RirG140670	RirG143910	RirG247240	RirG128200	RirG091820	RirG139740	RirG053960	RirG066160	RirG200070	RirG169970	RirG169740	RirG136270	RirG141430	RirG247940	RirG006840	RirG125390	RirG142440	RirG010450	RirG053610	RirG006810	RirG108310	RirG114490	RirG082720	RirG006830
15	278	15_3	18
				rir:18	RirG269350	RirG244580	RirG242490	RirG151350	RirG140880	RirG252950	RirG193970	RirG183640	RirG176270	RirG241030	RirG151590	RirG122390	RirG083500	RirG091760	RirG112460	RirG113810	RirG063750	RirG053690
15	278	15_4	15
				rir:15	RirG132550	RirG179340	RirG210860	RirG126030	RirG196310	RirG177880	RirG201740	RirG202220	RirG153630	RirG170670	RirG133210	RirG266780	RirG125930	RirG117280	RirG122510
15	278	15_5	13
				rir:13	RirG226020	RirG229670	RirG270150	RirG181390	RirG196300	RirG155210	RirG185760	RirG169980	RirG110980	RirG083940	RirG076280	RirG070060	RirG070400
15	278	15_6	13
				rir:13	RirG216450	RirG222960	RirG218300	RirG124800	RirG132070	RirG198320	RirG194020	RirG126810	RirG143580	RirG199220	RirG196870	RirG122530	RirG027390
15	278	15_7	12
				rir:12	RirG199670	RirG171120	RirG237530	RirG142540	RirG157790	RirG144020	RirG128850	RirG112450	RirG254710	RirG066970	RirG008900	RirG048810
15	278	15_8	11
				rir:11	RirG216440	RirG222940	RirG221880	RirG218290	RirG142230	RirG200390	RirG176260	RirG170010	RirG080780	RirG199210	RirG024100
15	278	15_9	11
				rir:11	RirG246330	RirG076860	RirG254840	RirG208000	RirG199660	RirG229660	RirG114550	RirG112470	RirG120770	RirG142240	RirG056410
15	278	15_10	9
				rir:9	RirG119480	RirG195150	RirG090190	RirG170290	RirG171920	RirG185750	RirG187410	RirG140470	RirG212050
15	278	15_11	8
				rir:8	RirG269210	RirG219000	RirG241040	RirG171390	RirG122450	RirG117150	RirG076290	RirG084640
15	278	15_12	8
				rir:8	RirG221890	RirG222950	RirG158210	RirG169670	RirG170020	RirG182110	RirG120450	RirG142040
15	278	15_13	8
				rir:8	RirG169690	RirG202210	RirG212130	RirG252960	RirG195160	RirG118030	RirG131440	RirG110410
15	278	15_14	8
				rir:8	RirG140780	RirG222540	RirG137060	RirG229600	RirG133400	RirG147270	RirG150720	RirG065460
15	278	15_15	7
				rir:7	RirG222970	RirG223880	RirG164860	RirG152300	RirG136260	RirG127370	RirG068820
15	278	15_16	7
				rir:7	RirG132990	RirG152310	RirG223870	RirG142410	RirG068830	RirG200400	RirG053680
15	278	15_17	6
				rir:6	RirG143540	RirG172520	RirG208070	RirG151340	RirG122520	RirG080260
15	278	15_18	6
				rir:6	RirG270010	RirG128490	RirG168500	RirG083950	RirG200500	RirG177890
15	278	15_19	5
				rir:5	RirG239890	RirG246340	RirG170200	RirG167670	RirG056400
15	278	15_20	5
				rir:5	RirG158840	RirG137050	RirG156960	RirG140770	RirG153510
15	278	15_21	5
				rir:5	RirG142370	RirG143650	RirG141440	RirG118080	RirG055900
15	278	15_22	5
				rir:5	RirG224750	RirG068090	RirG153520	RirG270070	RirG044160
15	278	15_23	5
				rir:5	RirG059540	RirG067230	RirG055290	RirG057850	RirG059670
15	278	15_24	4
				rir:4	RirG270060	RirG208080	RirG226010	RirG142100
15	278	15_25	3
				rir:3	RirG153640	RirG224760	RirG150360
15	278	15_26	3
				rir:3	RirG164340	RirG158830	RirG070410
15	278	15_27	3
				rir:3	RirG229610	RirG200870	RirG120440
15	278	15_28	3
				rir:3	RirG186630	RirG157010	RirG005270
15	278	15_29	3
				rir:3	RirG219010	RirG059620	RirG120280
15	278	15_30	3
				rir:3	RirG270140	RirG156950	RirG010980
15	278	15_31	3
				rir:3	RirG186640	RirG158630	RirG124080
15	278	15_32	2
				rir:2	RirG142430	RirG171380
15	278	15_33	2
				rir:2	RirG182120	RirG063740
15	278	15_34	2
				rir:2	RirG108320	RirG006530
15	278	15_35	2
				rir:2	RirG119470	RirG147260
15	278	15_36	2
				rir:2	RirG125380	RirG053250
15	278	15_37	2
				rir:2	RirG076270	RirG012150
16	274	16_1	51
				rir:49	RirG229740	RirG195830	RirG272480	RirG195850	RirG125250	RirG267800	RirG098410	RirG197640	RirG098840	RirG232020	RirG222760	RirG114500	RirG114510	RirG133360	RirG150640	RirG068660	RirG084980	RirG255990	RirG255980	RirG113290	RirG225250	RirG093260	RirG046330	RirG034950	RirG149980	RirG007010	RirG013880	RirG193070	RirG225240	RirG258350	RirG163680	RirG057050	RirG071810	RirG139860	RirG075780	RirG202600	RirG191940	RirG188450	RirG181560	RirG110550	RirG166310	RirG234130	RirG011580	RirG124260	RirG126640
				lab:2	fgenesh1_pm.LG_1_#_686	e_gw1.6.2820.1
16	274	16_2	16
				rir:16	RirG230330	RirG090710	RirG166300	RirG268790	RirG133350	RirG218330	RirG141350	RirG259670	RirG210580	RirG244510	RirG254270	RirG199510	RirG098810	RirG127030	RirG208320	RirG265180
16	274	16_3	14
				rir:14	RirG098090	RirG132560	RirG218280	RirG130120	RirG155950	RirG113300	RirG121170	RirG143390	RirG204430	RirG183900	RirG204060	RirG076230	RirG070130	RirG007890
16	274	16_4	10
				rir:10	RirG080580	RirG221940	RirG139870	RirG269120	RirG237750	RirG234140	RirG204050	RirG150630	RirG230580	RirG007880
16	274	16_5	10
				rir:10	RirG110530	RirG157450	RirG241820	RirG220020	RirG188440	RirG108960	RirG052200	RirG104430	RirG245730	RirG076620
16	274	16_6	10
				rir:10	RirG207500	RirG125810	RirG155930	RirG158780	RirG187240	RirG140180	RirG261610	RirG179800	RirG103920	RirG083310
16	274	16_7	8
				rir:8	RirG154280	RirG104790	RirG222210	RirG076760	RirG118290	RirG208570	RirG158790	RirG155940
16	274	16_8	7
				rir:7	RirG222750	RirG068970	RirG056050	RirG187250	RirG244990	RirG098420	RirG252250
16	274	16_9	6
				rir:6	RirG042450	RirG265030	RirG119720	RirG071800	RirG179590	RirG046320
16	274	16_10	6
				rir:6	RirG239850	RirG267790	RirG149970	RirG046310	RirG098850	RirG114560
16	274	16_11	6
				rir:6	RirG237760	RirG158800	RirG098400	RirG126330	RirG098820	RirG016030
16	274	16_12	5
				rir:5	RirG245720	RirG239860	RirG206120	RirG086450	RirG167610
16	274	16_13	5
				rir:5	RirG114570	RirG141470	RirG108950	RirG118300	RirG034610
16	274	16_14	4
				rir:4	RirG207090	RirG254280	RirG160130	RirG206960
16	274	16_15	4
				rir:4	RirG258050	RirG263670	RirG218370	RirG118280
16	274	16_16	4
				rir:4	RirG257300	RirG209610	RirG098830	RirG056040
16	274	16_17	4
				rir:4	RirG142080	RirG140860	RirG042570	RirG000590
16	274	16_18	3
				rir:3	RirG127270	RirG106060	RirG076090
16	274	16_19	3
				rir:3	RirG257290	RirG128510	RirG103930
16	274	16_20	3
				rir:3	RirG179820	RirG256900	RirG075080
16	274	16_21	3
				rir:3	RirG184630	RirG185200	RirG046300
16	274	16_22	3
				rir:3	RirG140080	RirG255960	RirG245810
16	274	16_23	3
				rir:3	RirG148060	RirG142520	RirG120740
16	274	16_24	3
				rir:3	RirG265710	RirG111940	RirG059850
16	274	16_25	3
				rir:3	RirG154490	RirG063610	RirG050840
16	274	16_26	3
				rir:3	RirG222740	RirG128560	RirG149640
16	274	16_27	3
				rir:3	RirG172660	RirG266000	RirG135910
16	274	16_28	3
				rir:3	RirG210740	RirG013870	RirG024600
16	274	16_29	3
				rir:3	RirG206950	RirG024590	RirG120730
16	274	16_30	3
				lab:3	fgenesh1_pm.LG_6_#_490	fgenesh1_pm.11_#_205	e_gw1.10.3581.1
16	274	16_31	3
				rir:3	RirG103940	RirG180380	RirG218360
16	274	16_32	2
				rir:2	RirG104080	RirG246990
16	274	16_33	2
				rir:2	RirG257060	RirG024610
16	274	16_34	2
				rir:2	RirG121190	RirG156400
16	274	16_35	2
				rir:2	RirG272280	RirG265170
16	274	16_36	2
				rir:2	RirG245680	RirG124140
16	274	16_37	2
				rir:2	RirG267770	RirG197630
16	274	16_38	2
				rir:2	RirG267870	RirG188710
16	274	16_39	2
				rir:2	RirG105590	RirG106070
16	274	16_40	2
				rir:2	RirG148030	RirG031330
16	274	16_41	2
				rir:2	RirG179810	RirG004140
16	274	16_42	2
				rir:2	RirG252220	RirG097230
16	274	16_43	2
				rir:2	RirG185640	RirG200240
16	274	16_44	2
				rir:2	RirG075760	RirG070140
16	274	16_45	2
				rir:2	RirG169480	RirG006560
16	274	16_46	2
				rir:2	RirG076080	RirG265020
16	274	16_47	2
				rir:2	RirG221900	RirG069940
16	274	16_48	2
				rir:2	RirG153470	RirG098430
16	274	16_49	2
				rir:2	RirG204420	RirG225230
16	274	16_50	2
				rir:2	RirG056060	RirG042550
16	274	16_51	2
				rir:2	RirG265040	RirG169470
16	274	16_52	2
				rir:2	RirG169120	RirG011770
16	274	16_53	2
				rir:2	RirG219150	RirG076630
16	274	16_54	2
				rir:2	RirG235210	RirG267830
16	274	16_55	2
				lab:2	e_gw1.1.11430.1	fgenesh1_pm.LG_1_#_688
16	274	16_56	2
				lab:2	fgenesh1_pm.15_#_44	Lacbi1.eu2.Lbscf0051g00230
16	274	16_57	2
				rir:2	RirG169490	RirG059320
16	274	16_58	2
				rir:2	RirG142990	RirG269830
16	274	16_59	2
				rir:2	RirG042560	RirG024620
16	274	16_60	2
				rir:2	RirG066220	RirG048860
16	274	16_61	2
				rir:2	RirG085680	RirG245820
16	274	16_62	2
				rir:2	RirG069400	RirG023200
17	262	17_1	130
				phb:130	estExt_fgeneshPB_pg.C_100142	fgeneshPB_pg.36__110	fgeneshPB_pg.2__59	fgeneshPB_pg.1__182	fgeneshPB_pg.5__439	fgeneshPB_pg.331__2	fgeneshPB_pg.12__26	fgeneshPB_pg.12__317	fgeneshPB_pg.12__21	estExt_fgeneshPB_pg.C_460014	fgeneshPB_pg.46__13	fgeneshPB_pg.19__114	fgeneshPB_pg.36__109	fgeneshPB_pg.6__228	fgeneshPB_pg.35__93	fgeneshPB_pg.4__741	fgeneshPB_pg.31__46	fgeneshPB_pg.10__21	fgeneshPB_pg.1__1115	fgeneshPB_pg.8__58	fgeneshPB_pg.6__212	fgeneshPB_pg.5__286	fgeneshPB_pg.1__435	estExt_fgeneshPB_pg.C_10620	estExt_fgeneshPB_pg.C_180016	fgeneshPB_pg.73__40	fgeneshPB_pg.10__48	fgeneshPB_pg.12__319	fgeneshPB_pg.12__146	estExt_fgeneshPB_pg.C_10036	fgeneshPB_pg.45__15	fgeneshPB_pg.37__120	fgeneshPB_pg.12__68	fgeneshPB_pg.4__492	estExt_fgeneshPB_pg.C_420100	fgeneshPB_pg.35__91	estExt_fgeneshPB_pg.C_120324	estExt_fgeneshPB_pg.C_120062	fgeneshPB_pg.19__113	fgeneshPB_pg.12__94	fgeneshPB_pg.12__261	fgeneshPB_pg.12__304	estExt_fgeneshPB_pg.C_90318	estExt_fgeneshPB_pg.C_40033	estExt_fgeneshPB_pg.C_190121
17	262	17_2	28
				phb:28	fgeneshPB_pg.12__61	fgeneshPB_pg.6__8	fgeneshPB_pg.69__25	fgeneshPB_pg.13__11	fgeneshPB_pg.12__286	fgeneshPB_pg.16__122	fgeneshPB_pg.13__301	fgeneshPB_pg.12__45	fgeneshPB_pg.13__193	fgeneshPB_pg.29__110	fgeneshPB_pg.71__11	fgeneshPB_pg.13__27	fgeneshPB_pg.19__156	fgeneshPB_pg.41__40	fgeneshPB_pg.36__111	fgeneshPB_pg.13__70	fgeneshPB_pg.58__31	fgeneshPB_pg.16__305	fgeneshPB_pg.30__11	fgeneshPB_pg.58__15	fgeneshPB_pg.41__47	fgeneshPB_pg.56__55	fgeneshPB_pg.69__24	fgeneshPB_pg.12__23	fgeneshPB_pg.25__156	fgeneshPB_pg.302__1	fgeneshPB_pg.16__306	fgeneshPB_pg.31__3
17	262	17_3	20
				phb:20	fgeneshPB_pg.10__210	estExt_fgeneshPB_pg.C_510071	estExt_fgeneshPB_pg.C_4800001	fgeneshPB_pg.12__239	fgeneshPB_pg.3__487	fgeneshPB_pg.69__14	fgeneshPB_pg.13__191	fgeneshPB_pg.12__46	fgeneshPB_pg.37__94	fgeneshPB_pg.47__55	fgeneshPB_pg.12__22	fgeneshPB_pg.9__146	fgeneshPB_pg.10__203	fgeneshPB_pg.60__57	fgeneshPB_pg.13__10	fgeneshPB_pg.47__51	fgeneshPB_pg.34__103	fgeneshPB_pg.1__47	estExt_fgeneshPB_pg.C_90141	fgeneshPB_pg.148__4
17	262	17_4	14
				phb:14	estExt_fgeneshPB_pg.C_4700001	fgeneshPB_pg.13__36	fgeneshPB_pg.36__67	fgeneshPB_pg.13__71	fgeneshPB_pg.12__153	fgeneshPB_pg.41__27	estExt_fgeneshPB_pg.C_350092	fgeneshPB_pg.41__76	fgeneshPB_pg.5__425	fgeneshPB_pg.21__71	fgeneshPB_pg.4__449	fgeneshPB_pg.13__146	fgeneshPB_pg.56__6	estExt_fgeneshPB_pg.C_100052
17	262	17_5	9
				phb:9	fgeneshPB_pg.31__24	fgeneshPB_pg.16__194	fgeneshPB_pg.47__57	fgeneshPB_pg.60__56	estExt_fgeneshPB_pg.C_90140	fgeneshPB_pg.7__407	fgeneshPB_pg.15__6	fgeneshPB_pg.56__16	fgeneshPB_pg.9__148
17	262	17_6	8
				phb:8	fgeneshPB_pg.69__31	estExt_fgeneshPB_pg.C_130161	fgeneshPB_pg.13__26	fgeneshPB_pg.21__80	fgeneshPB_pg.13__158	fgeneshPB_pg.3__506	fgeneshPB_pg.13__199	fgeneshPB_pg.8__20
17	262	17_7	8
				phb:8	fgeneshPB_pg.50__5	fgeneshPB_pg.13__130	fgeneshPB_pg.13__19	fgeneshPB_pg.12__98	fgeneshPB_pg.29__112	fgeneshPB_pg.13__128	fgeneshPB_pg.13__125	fgeneshPB_pg.50__6
17	262	17_8	6
				phb:6	fgeneshPB_pg.51__74	estExt_fgeneshPB_pg.C_120035	fgeneshPB_pg.13__144	fgeneshPB_pg.8__108	fgeneshPB_pg.302__2	fgeneshPB_pg.31__9
17	262	17_9	6
				phb:6	fgeneshPB_pg.8__57	fgeneshPB_pg.1__512	fgeneshPB_pg.8__19	fgeneshPB_pg.12__47	estExt_fgeneshPB_pg.C_30581	fgeneshPB_pg.12__80
17	262	17_10	5
				phb:5	fgeneshPB_pg.13__3	fgeneshPB_pg.13__1	fgeneshPB_pg.8__24	fgeneshPB_pg.29__111	fgeneshPB_pg.12__96
17	262	17_11	4
				phb:4	estExt_fgeneshPB_pg.C_120113	fgeneshPB_pg.12__110	fgeneshPB_pg.13__196	estExt_fgeneshPB_pg.C_130002
17	262	17_12	3
				phb:3	fgeneshPB_pg.1__181	fgeneshPB_pg.71__9	fgeneshPB_pg.47__54
17	262	17_13	3
				phb:3	fgeneshPB_pg.8__30	fgeneshPB_pg.6__455	fgeneshPB_pg.18__131
17	262	17_14	3
				phb:3	estExt_fgeneshPB_pg.C_80011	fgeneshPB_pg.71__10	fgeneshPB_pg.71__15
17	262	17_15	3
				phb:3	fgeneshPB_pg.12__111	fgeneshPB_pg.12__81	fgeneshPB_pg.402__1
17	262	17_16	2
				phb:2	fgeneshPB_pg.32__67	fgeneshPB_pg.20__99
17	262	17_17	2
				phb:2	fgeneshPB_pg.12__48	fgeneshPB_pg.56__11
17	262	17_18	2
				phb:2	estExt_fgeneshPB_pg.C_80336	fgeneshPB_pg.9__147
17	262	17_19	2
				phb:2	estExt_fgeneshPB_pg.C_490034	fgeneshPB_pg.12__95
17	262	17_20	2
				phb:2	fgeneshPB_pg.56__29	fgeneshPB_pg.12__24
17	262	17_21	2
				phb:2	estExt_fgeneshPB_pg.C_10230	estExt_fgeneshPB_pg.C_60030
18	252	18_1	103
				rir:103	RirG213380	RirG209140	RirG195040	RirG241390	RirG209170	RirG149480	RirG209130	RirG236250	RirG158220	RirG259100	RirG206560	RirG230890	RirG146840	RirG113740	RirG211230	RirG149510	RirG168990	RirG114770	RirG195230	RirG209150	RirG195260	RirG064040	RirG064060	RirG113730	RirG195240	RirG069830	RirG102360	RirG097970	RirG119660	RirG071650	RirG206570	RirG243070	RirG098000	RirG204840	RirG253020	RirG074280	RirG209160	RirG273170	RirG206550	RirG145720	RirG135810	RirG200890	RirG211300	RirG179420	RirG078810
18	252	18_2	73
				rir:73	RirG147120	RirG234200	RirG116140	RirG147110	RirG149470	RirG233410	RirG146350	RirG200910	RirG147100	RirG219620	RirG137770	RirG141930	RirG211260	RirG111700	RirG147470	RirG209180	RirG195020	RirG227350	RirG147090	RirG138770	RirG216920	RirG188870	RirG247050	RirG250020	RirG135830	RirG135860	RirG135660	RirG122170	RirG181910	RirG106080	RirG161920	RirG247080	RirG227370	RirG136560	RirG113680	RirG239040	RirG135840	RirG271260	RirG247070	RirG215370	RirG064050	RirG097990	RirG088360	RirG088710	RirG211280
18	252	18_3	29
				rir:29	RirG240670	RirG064070	RirG102800	RirG194700	RirG234370	RirG247100	RirG252140	RirG137390	RirG137350	RirG096750	RirG094910	RirG087780	RirG106590	RirG024550	RirG037350	RirG234390	RirG138640	RirG057290	RirG136910	RirG075720	RirG137540	RirG082060	RirG234240	RirG121850	RirG161910	RirG025410	RirG105390	RirG119860	RirG092950
18	252	18_4	9
				rir:9	RirG166560	RirG207740	RirG273210	RirG103770	RirG165900	RirG124390	RirG045180	RirG041750	RirG025840
18	252	18_5	7
				rir:7	RirG240010	RirG247090	RirG137360	RirG136550	RirG095820	RirG064850	RirG187120
18	252	18_6	7
				rir:7	RirG271250	RirG145090	RirG154970	RirG153870	RirG210450	RirG154840	RirG082310
18	252	18_7	6
				rir:6	RirG078310	RirG269230	RirG106560	RirG252130	RirG044630	RirG019270
18	252	18_8	6
				rir:6	RirG204860	RirG247060	RirG211290	RirG215360	RirG040490	RirG012120
18	252	18_9	6
				rir:6	RirG146820	RirG220520	RirG122020	RirG179790	RirG019930	RirG041730
18	252	18_10	3
				rir:3	RirG154830	RirG214530	RirG095690
18	252	18_11	3
				rir:3	RirG219610	RirG217550	RirG273200
19	249	19_1	44
				mob:44	fgenesh2_pg.scaffold_27000081	fgenesh2_pg.scaffold_26000018	fgenesh1_pg.scaffold_52000031	fgenesh2_pg.scaffold_11000042	fgenesh1_pg.scaffold_214000001	fgenesh1_pg.scaffold_44000005	fgenesh1_pg.scaffold_36000071	fgenesh1_pg.scaffold_19000056	fgenesh1_pg.scaffold_6000131	fgenesh1_pg.scaffold_6000132	fgenesh2_pg.scaffold_44000005	fgenesh1_pg.scaffold_53000024	fgenesh2_pg.scaffold_208000002	fgenesh2_pg.scaffold_287000001	fgenesh2_pg.scaffold_54000003	fgenesh2_pg.scaffold_15000098	fgenesh1_pg.scaffold_11000046	fgenesh1_pg.scaffold_109000001	fgenesh2_pg.scaffold_109000001	fgenesh1_pg.scaffold_26000022	fgenesh1_pg.scaffold_10000092	fgenesh2_pg.scaffold_6000138	fgenesh1_pg.scaffold_29000122	fgenesh1_pg.scaffold_13000115	fgenesh1_pg.scaffold_39000072	fgenesh1_pg.scaffold_18000061	fgenesh1_pg.scaffold_39000073	fgenesh1_pg.scaffold_2000696	fgenesh1_pg.scaffold_71000001	fgenesh2_pg.scaffold_8000227	fgenesh1_pg.scaffold_15000087	fgenesh1_pg.scaffold_39000075	fgenesh1_pg.scaffold_55000016	fgenesh2_pg.scaffold_8000228	fgenesh1_pg.scaffold_54000001	fgenesh1_pg.scaffold_31000001	fgenesh2_pg.scaffold_6000140	fgenesh1_pg.scaffold_40000064	fgenesh2_pg.scaffold_39000076	fgenesh1_pg.scaffold_8000230	fgenesh1_pg.scaffold_141000001	fgenesh1_pg.scaffold_34000094	fgenesh1_pg.scaffold_50000032	fgenesh2_pg.scaffold_34000096
19	249	19_2	11
				mob:11	fgenesh2_pg.scaffold_39000074	fgenesh1_pg.scaffold_39000071	fgenesh2_pg.scaffold_34000097	fgenesh1_pg.scaffold_12000093	fgenesh2_pg.scaffold_20000067	fgenesh2_pg.scaffold_5000042	fgenesh1_pg.scaffold_5000041	fgenesh2_pg.scaffold_12000098	fgenesh2_pg.scaffold_24000066	fgenesh2_pg.scaffold_25000140	fgenesh1_pg.scaffold_25000120
19	249	19_3	11
				mob:11	fgenesh2_pg.scaffold_30000102	fgenesh2_pg.scaffold_26000024	fgenesh2_pg.scaffold_13000126	fgenesh1_pg.scaffold_30000100	fgenesh1_pg.scaffold_26000026	fgenesh2_pg.scaffold_27000084	fgenesh1_pg.scaffold_27000077	fgenesh1_pg.scaffold_67000001	fgenesh2_pg.scaffold_67000001	fgenesh1_pg.scaffold_3000454	fgenesh1_pg.scaffold_39000074
19	249	19_4	10
				mob:10	fgenesh2_pg.scaffold_10000153	fgenesh2_pg.scaffold_18000067	fgenesh1_pg.scaffold_50000031	fgenesh2_pg.scaffold_37000088	fgenesh2_pg.scaffold_13000127	fgenesh1_pg.scaffold_13000116	fgenesh1_pg.scaffold_67000002	fgenesh2_pg.scaffold_54000001	fgenesh1_pg.scaffold_54000002	fgenesh2_pg.scaffold_94000002
19	249	19_5	8
				mob:8	fgenesh2_pg.scaffold_43000002	fgenesh1_pg.scaffold_43000003	estExt_fgenesh1_pg.C_430003	fgenesh1_pg.scaffold_34000095	fgenesh2_pg.scaffold_18000066	fgenesh1_pg.scaffold_18000058	fgenesh1_pg.scaffold_20000065	fgenesh2_pg.scaffold_3000479
19	249	19_6	8
				mob:8	fgenesh2_pg.scaffold_94000001	fgenesh2_pg.scaffold_9000137	fgenesh2_pg.scaffold_5000043	fgenesh1_pg.scaffold_9000120	fgenesh1_pg.scaffold_90000001	fgenesh2_pg.scaffold_10000151	fgenesh2_pg.scaffold_43000001	fgenesh1_pg.scaffold_2000102
19	249	19_7	7
				mob:7	fgenesh1_pg.scaffold_42000051	fgenesh2_pg.scaffold_42000052	fgenesh1_pg.scaffold_20000066	fgenesh2_pg.scaffold_166000001	fgenesh1_pg.scaffold_166000001	fgenesh2_pg.scaffold_70000001	fgenesh1_pg.scaffold_70000002
19	249	19_8	6
				mob:6	fgenesh2_pg.scaffold_599000001	fgenesh2_pg.scaffold_53000024	fgenesh1_pg.scaffold_599000001	fgenesh1_pg.scaffold_18000060	fgenesh1_pg.scaffold_53000025	fgenesh1_pg.scaffold_5000042
19	249	19_9	6
				mob:6	fgenesh2_pg.scaffold_67000002	fgenesh1_pg.scaffold_21000110	fgenesh2_pg.scaffold_21000104	fgenesh2_pg.scaffold_8000225	fgenesh1_pg.scaffold_10000091	fgenesh2_pg.scaffold_12000096
19	249	19_10	5
				mob:5	fgenesh2_pg.scaffold_29000127	fgenesh1_pg.scaffold_29000124	fgenesh1_pg.scaffold_27000079	fgenesh2_pg.scaffold_14000179	fgenesh1_pg.scaffold_14000166
19	249	19_11	5
				mob:5	fgenesh2_pg.scaffold_12000095	fgenesh2_pg.scaffold_142000001	fgenesh1_pg.scaffold_142000001	fgenesh1_pg.scaffold_208000001	fgenesh1_pg.scaffold_12000090
19	249	19_12	5
				mob:5	fgenesh1_pg.scaffold_2000100	fgenesh1_pg.scaffold_7000269	fgenesh1_pg.scaffold_12000089	fgenesh1_pg.scaffold_342000001	fgenesh2_pg.scaffold_342000001
19	249	19_13	4
				mob:4	fgenesh2_pg.scaffold_10000090	fgenesh1_pg.scaffold_37000077	fgenesh1_pg.scaffold_10000148	fgenesh2_pg.scaffold_53000025
19	249	19_14	4
				mob:4	fgenesh2_pg.scaffold_50000033	fgenesh2_pg.scaffold_569000001	fgenesh1_pg.scaffold_569000001	fgenesh1_pg.scaffold_144000001
19	249	19_15	4
				mob:4	fgenesh2_pg.scaffold_214000001	fgenesh2_pg.scaffold_5000044	fgenesh1_pg.scaffold_5000043	fgenesh1_pg.scaffold_44000004
19	249	19_16	4
				mob:4	estExt_fgenesh2_pg.C_50039	fgenesh2_pg.scaffold_5000039	fgenesh1_pg.scaffold_5000039	estExt_fgenesh1_pg.C_50039
19	249	19_17	4
				mob:4	fgenesh2_pg.scaffold_3000478	fgenesh1_pg.scaffold_3000483	estExt_fgenesh1_pg.C_30480	estExt_fgenesh2_pg.C_30476
19	249	19_18	4
				mob:4	fgenesh2_pg.scaffold_153000001	fgenesh1_pg.scaffold_153000001	fgenesh2_pg.scaffold_13000125	fgenesh2_pg.scaffold_26000019
19	249	19_19	3
				mob:3	fgenesh1_pg.scaffold_38000076	fgenesh2_pg.scaffold_38000080	fgenesh2_pg.scaffold_37000087
19	249	19_20	3
				mob:3	fgenesh2_pg.scaffold_12000094	fgenesh2_pg.scaffold_6000139	fgenesh2_pg.scaffold_27000086
19	249	19_21	3
				mob:3	fgenesh1_pg.scaffold_126000001	fgenesh2_pg.scaffold_126000001	fgenesh2_pg.scaffold_2000102
19	249	19_22	3
				mob:3	fgenesh2_pg.scaffold_193000001	fgenesh2_pg.scaffold_153000002	fgenesh1_pg.scaffold_153000002
19	249	19_23	3
				mob:3	fgenesh2_pg.scaffold_119000001	fgenesh2_pg.scaffold_447000001	fgenesh1_pg.scaffold_447000001
19	249	19_24	3
				mob:3	fgenesh2_pg.scaffold_26000020	fgenesh1_pg.scaffold_30000101	fgenesh2_pg.scaffold_30000103
19	249	19_25	3
				mob:3	fgenesh1_pg.scaffold_94000001	fgenesh2_pg.scaffold_27000085	fgenesh1_pg.scaffold_13000114
19	249	19_26	3
				mob:3	fgenesh1_pg.scaffold_24000061	fgenesh2_pg.scaffold_24000063	fgenesh1_pg.scaffold_131000001
19	249	19_27	3
				mob:3	fgenesh1_pg.scaffold_24000063	fgenesh1_pg.scaffold_29000123	fgenesh2_pg.scaffold_24000065
19	249	19_28	3
				mob:3	fgenesh1_pg.scaffold_119000001	fgenesh1_pg.scaffold_27000080	fgenesh1_pg.scaffold_30000103
19	249	19_29	3
				mob:3	fgenesh2_pg.scaffold_10000091	fgenesh2_pg.scaffold_44000004	fgenesh2_pg.scaffold_418000001
19	249	19_30	2
				mob:2	estExt_fgenesh1_pg.C_130116	fgenesh1_pg.scaffold_13000117
19	249	19_31	2
				mob:2	fgenesh1_pg.scaffold_35000096	fgenesh2_pg.scaffold_35000101
19	249	19_32	2
				mob:2	fgenesh2_pg.scaffold_19000067	fgenesh1_pg.scaffold_19000058
19	249	19_33	2
				mob:2	fgenesh2_pg.scaffold_25000141	fgenesh1_pg.scaffold_25000121
19	249	19_34	2
				mob:2	fgenesh1_pg.scaffold_23000132	fgenesh2_pg.scaffold_3000449
19	249	19_35	2
				mob:2	fgenesh2_pg.scaffold_113000001	fgenesh1_pg.scaffold_113000001
19	249	19_36	2
				mob:2	estExt_fgenesh1_pg.C_150088	fgenesh1_pg.scaffold_15000089
19	249	19_37	2
				mob:2	fgenesh2_pg.scaffold_15000100	estExt_fgenesh2_pg.C_150099
19	249	19_38	2
				mob:2	fgenesh2_pg.scaffold_2000101	fgenesh1_pg.scaffold_2000101
19	249	19_39	2
				mob:2	fgenesh1_pg.scaffold_3000484	fgenesh1_pg.scaffold_24000064
19	249	19_40	2
				mob:2	fgenesh2_pg.scaffold_208000001	fgenesh1_pg.scaffold_208000002
19	249	19_41	2
				mob:2	fgenesh2_pg.scaffold_4000002	fgenesh1_pg.scaffold_4000002
19	249	19_42	2
				mob:2	fgenesh2_pg.scaffold_107000001	fgenesh1_pg.scaffold_107000001
19	249	19_43	2
				mob:2	fgenesh1_pg.scaffold_193000001	fgenesh2_pg.scaffold_193000002
19	249	19_44	2
				mob:2	fgenesh2_pg.scaffold_30000106	fgenesh2_pg.scaffold_33000109
19	249	19_45	2
				mob:2	fgenesh2_pg.scaffold_52000033	fgenesh1_pg.scaffold_53000026
19	249	19_46	2
				mob:2	fgenesh2_pg.scaffold_19000065	fgenesh1_pg.scaffold_12000091
19	249	19_47	2
				mob:2	fgenesh2_pg.scaffold_4000001	fgenesh1_pg.scaffold_4000001
19	249	19_48	2
				mob:2	fgenesh2_pg.scaffold_12000093	fgenesh1_pg.scaffold_12000088
19	249	19_49	2
				mob:2	fgenesh1_pg.scaffold_15000088	fgenesh2_pg.scaffold_15000099
19	249	19_50	2
				mob:2	fgenesh1_pg.scaffold_8000229	fgenesh2_pg.scaffold_8000226
19	249	19_51	2
				mob:2	fgenesh1_pg.scaffold_8000228	fgenesh2_pg.scaffold_10000092
19	249	19_52	2
				mob:2	fgenesh2_pg.scaffold_37000089	fgenesh1_pg.scaffold_37000078
19	249	19_53	2
				mob:2	fgenesh2_pg.scaffold_2000099	fgenesh1_pg.scaffold_2000098
19	249	19_54	2
				mob:2	fgenesh1_pg.scaffold_37000079	fgenesh1_pg.scaffold_27000078
19	249	19_55	2
				mob:2	fgenesh2_pg.scaffold_30000105	fgenesh2_pg.scaffold_22000001
19	249	19_56	2
				mob:2	fgenesh2_pg.scaffold_200000001	fgenesh1_pg.scaffold_200000001
19	249	19_57	2
				mob:2	fgenesh2_pg.scaffold_27000083	fgenesh1_pg.scaffold_27000076
19	249	19_58	2
				mob:2	fgenesh2_pg.scaffold_118000001	fgenesh1_pg.scaffold_118000001
19	249	19_59	2
				mob:2	fgenesh1_pg.scaffold_14000167	fgenesh1_pg.scaffold_223000001
19	249	19_60	2
				mob:2	fgenesh2_pg.scaffold_5000041	fgenesh1_pg.scaffold_5000040
19	249	19_61	2
				mob:2	fgenesh1_pg.scaffold_244000001	fgenesh1_pg.scaffold_113000002
19	249	19_62	2
				mob:2	fgenesh1_pg.scaffold_418000001	fgenesh1_pg.scaffold_70000001
20	236	20_1	148
				rir:148	RirG197200	RirG227550	RirG258480	RirG150310	RirG165830	RirG218750	RirG139960	RirG195050	RirG225890	RirG272750	RirG246910	RirG268710	RirG236240	RirG273250	RirG246960	RirG273290	RirG273440	RirG259120	RirG265320	RirG255540	RirG225900	RirG244680	RirG228410	RirG096470	RirG108750	RirG108730	RirG160480	RirG143680	RirG225660	RirG183040	RirG116010	RirG121590	RirG150880	RirG201570	RirG116020	RirG177800	RirG202940	RirG165840	RirG149740	RirG179550	RirG225860	RirG179540	RirG218760	RirG114240	RirG179140
20	236	20_2	27
				rir:27	RirG104520	RirG239270	RirG236520	RirG225920	RirG246950	RirG256080	RirG246920	RirG241350	RirG143670	RirG177780	RirG187140	RirG220280	RirG146560	RirG155510	RirG166990	RirG157510	RirG139950	RirG149490	RirG129240	RirG139970	RirG107290	RirG070800	RirG085150	RirG073500	RirG087630	RirG039570	RirG005530
20	236	20_3	27
				rir:27	RirG246900	RirG241470	RirG225770	RirG186560	RirG149770	RirG220980	RirG111590	RirG254390	RirG268940	RirG268950	RirG137380	RirG137640	RirG108720	RirG079290	RirG017650	RirG063450	RirG019070	RirG053060	RirG039930	RirG029830	RirG218220	RirG067620	RirG212980	RirG070810	RirG017070	RirG273300	RirG000520
20	236	20_4	26
				rir:26	RirG271940	RirG232630	RirG247540	RirG273280	RirG095670	RirG108880	RirG225870	RirG126060	RirG157500	RirG225780	RirG129260	RirG220940	RirG129220	RirG095810	RirG144570	RirG115920	RirG113970	RirG116860	RirG171580	RirG089630	RirG089640	RirG082420	RirG020920	RirG053080	RirG054450	RirG019910
20	236	20_5	8
				rir:8	RirG095800	RirG167140	RirG126050	RirG171570	RirG108890	RirG017640	RirG015720	RirG000530
21	214	21_1	53
				rho:53	RO3G_13286	RO3G_08846	RO3G_07707	RO3G_07690	RO3G_00679	RO3G_11773	RO3G_09499	RO3G_03624	RO3G_16807	RO3G_13919	RO3G_16555	RO3G_16551	RO3G_03571	RO3G_17382	RO3G_10732	RO3G_07875	RO3G_07303	RO3G_06441	RO3G_05635	RO3G_14560	RO3G_02689	RO3G_17285	RO3G_15675	RO3G_14359	RO3G_11401	RO3G_13848	RO3G_09483	RO3G_05336	RO3G_01652	RO3G_00681	RO3G_09544	RO3G_01956	RO3G_10550	RO3G_08661	RO3G_17400	RO3G_11281	RO3G_06423	RO3G_16729	RO3G_00284	RO3G_10235	RO3G_02713	RO3G_16829	RO3G_09607	RO3G_16904	RO3G_01730
21	214	21_2	37
				rho:37	RO3G_10772	RO3G_04127	RO3G_08657	RO3G_03554	RO3G_00244	RO3G_13137	RO3G_01190	RO3G_15579	RO3G_08842	RO3G_03772	RO3G_01618	RO3G_16545	RO3G_09612	RO3G_13271	RO3G_16359	RO3G_07688	RO3G_10866	RO3G_00255	RO3G_08663	RO3G_07031	RO3G_16554	RO3G_13147	RO3G_03766	RO3G_02844	RO3G_07112	RO3G_04205	RO3G_13266	RO3G_03803	RO3G_15001	RO3G_11266	RO3G_11240	RO3G_07120	RO3G_15575	RO3G_15146	RO3G_14621	RO3G_10800	RO3G_12664
21	214	21_3	25
				rho:25	RO3G_17408	RO3G_12166	RO3G_13743	RO3G_10741	RO3G_00688	RO3G_16727	RO3G_16719	RO3G_10787	RO3G_08847	RO3G_10763	RO3G_16550	RO3G_00304	RO3G_04787	RO3G_12954	RO3G_04690	RO3G_05431	RO3G_05622	RO3G_13151	RO3G_15141	RO3G_10770	RO3G_10762	RO3G_02822	RO3G_09168	RO3G_07129	RO3G_01188
21	214	21_4	25
				rho:25	RO3G_10236	RO3G_13453	RO3G_15582	RO3G_10529	RO3G_13456	RO3G_00676	RO3G_16703	RO3G_16721	RO3G_12060	RO3G_17154	RO3G_02224	RO3G_11981	RO3G_16897	RO3G_07704	RO3G_13726	RO3G_07706	RO3G_02846	RO3G_10768	RO3G_03616	RO3G_10769	RO3G_13454	RO3G_15583	RO3G_17215	RO3G_03109	RO3G_01612
21	214	21_5	20
				rho:20	RO3G_00243	RO3G_01932	RO3G_16716	RO3G_17448	RO3G_10239	RO3G_01209	RO3G_09616	RO3G_16146	RO3G_07037	RO3G_07032	RO3G_12085	RO3G_00703	RO3G_06722	RO3G_14349	RO3G_16363	RO3G_08112	RO3G_10726	RO3G_15279	RO3G_13277	RO3G_12652
21	214	21_6	9
				rho:9	RO3G_16911	RO3G_05634	RO3G_12069	RO3G_10793	RO3G_00700	RO3G_16822	RO3G_13737	RO3G_13727	RO3G_03776
21	214	21_7	9
				rho:9	RO3G_02950	RO3G_01732	RO3G_12466	RO3G_03768	RO3G_07713	RO3G_13287	RO3G_02957	RO3G_07099	RO3G_01948
21	214	21_8	8
				rho:8	RO3G_02706	RO3G_01960	RO3G_17222	RO3G_12678	RO3G_02845	RO3G_03602	RO3G_13742	RO3G_03615
21	214	21_9	6
				rho:6	RO3G_13734	RO3G_12666	RO3G_17202	RO3G_11411	RO3G_05945	RO3G_03594
21	214	21_10	6
				rho:6	RO3G_01959	RO3G_12659	RO3G_16140	RO3G_16751	RO3G_10220	RO3G_03603
21	214	21_11	5
				rho:5	RO3G_09481	RO3G_04677	RO3G_16373	RO3G_12658	RO3G_03588
21	214	21_12	5
				rho:5	RO3G_07877	RO3G_13733	RO3G_13718	RO3G_13720	RO3G_05350
21	214	21_13	4
				rho:4	RO3G_15251	RO3G_14567	RO3G_17363	RO3G_03113
21	214	21_14	2
				rho:2	RO3G_16378	RO3G_16824
22	211	22_1	61
				rir:61	RirG230900	RirG237360	RirG237370	RirG243060	RirG269260	RirG264020	RirG268130	RirG264160	RirG268240	RirG242300	RirG245980	RirG249320	RirG210480	RirG195070	RirG184130	RirG211380	RirG225440	RirG221990	RirG202910	RirG206580	RirG217450	RirG227560	RirG213340	RirG203130	RirG205420	RirG207190	RirG215600	RirG215570	RirG194170	RirG214590	RirG207220	RirG203160	RirG203120	RirG131170	RirG114270	RirG165850	RirG171520	RirG115260	RirG146520	RirG180440	RirG160350	RirG114820	RirG166320	RirG160880	RirG114780
22	211	22_2	61
				rir:61	RirG230950	RirG236730	RirG240370	RirG273520	RirG262650	RirG271860	RirG233110	RirG218940	RirG187290	RirG212920	RirG235580	RirG213240	RirG208240	RirG262680	RirG210490	RirG203930	RirG198580	RirG218870	RirG203850	RirG248800	RirG262660	RirG262690	RirG262620	RirG220090	RirG218920	RirG262610	RirG218970	RirG255460	RirG162750	RirG139180	RirG179720	RirG123040	RirG179730	RirG129450	RirG179750	RirG131180	RirG208210	RirG179700	RirG134020	RirG171940	RirG208150	RirG205380	RirG033800	RirG062740	RirG067940
22	211	22_3	28
				rir:28	RirG260000	RirG129460	RirG232920	RirG181890	RirG232910	RirG157340	RirG187270	RirG042200	RirG054430	RirG039310	RirG106210	RirG049180	RirG029390	RirG137370	RirG137530	RirG101120	RirG091030	RirG048880	RirG112340	RirG017660	RirG026260	RirG224100	RirG003430	RirG010870	RirG001550	RirG049090	RirG029380	RirG000280
22	211	22_4	26
				rir:26	RirG246030	RirG262230	RirG273350	RirG106620	RirG207520	RirG215210	RirG193400	RirG215000	RirG215200	RirG221340	RirG204870	RirG198080	RirG202920	RirG113550	RirG150240	RirG142330	RirG118790	RirG148330	RirG108980	RirG094900	RirG030390	RirG056960	RirG096800	RirG106750	RirG039800	RirG026750
22	211	22_5	9
				rir:9	RirG267150	RirG233090	RirG162670	RirG133240	RirG105060	RirG093740	RirG093670	RirG052710	RirG030280
22	211	22_6	7
				rir:7	RirG120680	RirG144480	RirG163050	RirG220100	RirG240800	RirG101650	RirG039300
22	211	22_7	6
				rir:6	RirG210200	RirG201690	RirG171050	RirG071440	RirG038030	RirG017050
22	211	22_8	5
				rir:5	RirG115030	RirG269240	RirG171040	RirG135360	RirG028930
22	211	22_9	3
				rir:3	RirG270770	RirG028920	RirG246020
22	211	22_10	3
				rir:3	RirG200790	RirG146970	RirG139110
22	211	22_11	2
				rir:2	RirG263730	RirG063860
23	201	23_1	29
				lab:1	fgenesh1_pm.LG_3_#_1661
				mob:28	fgenesh2_pg.scaffold_17000168	fgenesh1_pg.scaffold_2000815	fgenesh1_pg.scaffold_9000267	fgenesh1_pg.scaffold_12000223	fgenesh1_pg.scaffold_77000001	fgenesh1_pg.scaffold_16000001	fgenesh2_pg.scaffold_18000001	fgenesh2_pg.scaffold_9000283	fgenesh1_pg.scaffold_228000001	fgenesh2_pg.scaffold_26000135	fgenesh2_pg.scaffold_16000002	fgenesh2_pg.scaffold_19000186	fgenesh2_pg.scaffold_85000001	fgenesh2_pg.scaffold_34000001	fgenesh1_pg.scaffold_32000001	fgenesh2_pg.scaffold_132000002	fgenesh1_pg.scaffold_19000001	fgenesh1_pg.scaffold_34000001	fgenesh1_pg.scaffold_8000001	fgenesh1_pg.scaffold_40000001	fgenesh2_pg.scaffold_12000241	fgenesh2_pg.scaffold_20000133	fgenesh1_pg.scaffold_270000001	fgenesh2_pg.scaffold_16000003	fgenesh1_pg.scaffold_11000259	fgenesh2_pg.scaffold_38000003	fgenesh1_pg.scaffold_155000001	fgenesh1_pg.scaffold_100000002
23	201	23_2	22
				mob:22	estExt_fgenesh1_pg.C_110257	fgenesh1_pg.scaffold_11000258	fgenesh1_pg.scaffold_32000002	fgenesh1_pg.scaffold_2000814	fgenesh1_pg.scaffold_35000003	fgenesh1_pg.scaffold_34000002	fgenesh1_pg.scaffold_41000001	fgenesh2_pg.scaffold_34000004	fgenesh2_pg.scaffold_41000001	fgenesh1_pg.scaffold_4000462	fgenesh2_pg.scaffold_2000847	fgenesh2_pg.scaffold_11000251	estExt_fgenesh2_pg.C_110250	fgenesh2_pg.scaffold_35000003	fgenesh1_pg.scaffold_7000001	fgenesh2_pg.scaffold_32000003	fgenesh2_pg.scaffold_7000001	fgenesh2_pg.scaffold_4000480	fgenesh2_pg.scaffold_9000281	fgenesh2_pg.scaffold_12000238	estExt_fgenesh2_pg.C_120238	fgenesh1_pg.scaffold_14000001
23	201	23_3	13
				mob:13	fgenesh2_pg.scaffold_47000049	fgenesh2_pg.scaffold_10000249	fgenesh2_pg.scaffold_54000011	fgenesh1_pg.scaffold_54000013	fgenesh2_pg.scaffold_27000002	fgenesh2_pg.scaffold_15000246	fgenesh2_pg.scaffold_41000066	fgenesh1_pg.scaffold_100000001	fgenesh2_pg.scaffold_100000001	fgenesh1_pg.scaffold_10000237	fgenesh2_pg.scaffold_12000239	fgenesh2_pg.scaffold_21000003	fgenesh1_pg.scaffold_21000003
23	201	23_4	12
				mob:12	fgenesh2_pg.scaffold_47000048	fgenesh2_pg.scaffold_10000248	fgenesh2_pg.scaffold_25000007	fgenesh1_pg.scaffold_25000004	fgenesh1_pg.scaffold_13000235	fgenesh2_pg.scaffold_13000242	fgenesh2_pg.scaffold_35000008	fgenesh1_pg.scaffold_35000007	fgenesh2_pg.scaffold_35000067	fgenesh1_pg.scaffold_35000061	estExt_fgenesh2_pg.C_350066	estExt_fgenesh1_pg.C_350059
23	201	23_5	9
				mob:9	fgenesh2_pg.scaffold_77000002	fgenesh2_pg.scaffold_65000001	fgenesh2_pg.scaffold_39000001	fgenesh1_pg.scaffold_39000001	fgenesh2_pg.scaffold_17000169	fgenesh2_pg.scaffold_125000001	fgenesh1_pg.scaffold_125000001	fgenesh1_pg.scaffold_27000107	fgenesh2_pg.scaffold_27000117
23	201	23_6	8
				mob:8	fgenesh2_pg.scaffold_31000118	fgenesh1_pg.scaffold_31000126	fgenesh2_pg.scaffold_31000117	fgenesh1_pg.scaffold_31000125	fgenesh1_pg.scaffold_38000002	fgenesh2_pg.scaffold_602000001	fgenesh1_pg.scaffold_602000001	fgenesh2_pg.scaffold_228000001
23	201	23_7	8
				mob:8	fgenesh2_pg.scaffold_85000002	fgenesh2_pg.scaffold_6000361	fgenesh2_pg.scaffold_47000050	fgenesh1_pg.scaffold_47000045	fgenesh2_pg.scaffold_5000354	fgenesh2_pg.scaffold_12000240	fgenesh2_pg.scaffold_32000001	fgenesh2_pg.scaffold_11000001
23	201	23_8	6
				mob:6	fgenesh1_pg.scaffold_22000150	fgenesh1_pg.scaffold_73000001	fgenesh2_pg.scaffold_73000002	fgenesh1_pg.scaffold_26000138	fgenesh2_pg.scaffold_45000053	fgenesh1_pg.scaffold_45000051
23	201	23_9	5
				mob:5	fgenesh1_pg.scaffold_22000151	fgenesh2_pg.scaffold_22000156	fgenesh2_pg.scaffold_87000001	fgenesh1_pg.scaffold_5000001	fgenesh2_pg.scaffold_5000001
23	201	23_10	5
				mob:5	fgenesh2_pg.scaffold_6000001	fgenesh2_pg.scaffold_305000001	fgenesh1_pg.scaffold_305000001	fgenesh2_pg.scaffold_228000002	fgenesh1_pg.scaffold_12000224
23	201	23_11	4
				mob:4	fgenesh2_pg.scaffold_64000002	fgenesh1_pg.scaffold_64000002	fgenesh1_pg.scaffold_65000001	estExt_fgenesh1_pg.C_640002
23	201	23_12	4
				mob:4	fgenesh1_pg.scaffold_74000001	estExt_fgenesh1_pg.C_740001	fgenesh1_pg.scaffold_80000003	fgenesh2_pg.scaffold_80000002
23	201	23_13	4
				mob:4	fgenesh2_pg.scaffold_173000001	fgenesh1_pg.scaffold_173000001	fgenesh1_pg.scaffold_72000001	fgenesh2_pg.scaffold_72000002
23	201	23_14	4
				mob:4	fgenesh2_pg.scaffold_8000299	fgenesh1_pg.scaffold_8000296	fgenesh2_pg.scaffold_22000155	fgenesh1_pg.scaffold_19000177
23	201	23_15	4
				mob:4	fgenesh2_pg.scaffold_12000006	estExt_fgenesh2_pg.C_120006	fgenesh1_pg.scaffold_12000006	estExt_fgenesh1_pg.C_120006
23	201	23_16	3
				mob:3	fgenesh2_pg.scaffold_26000001	fgenesh1_pg.scaffold_26000001	fgenesh1_pg.scaffold_87000001
23	201	23_17	3
				mob:3	fgenesh1_pg.scaffold_30000001	fgenesh1_pg.scaffold_132000002	estExt_fgenesh1_pg.C_300001
23	201	23_18	3
				mob:3	fgenesh1_pg.scaffold_27000002	fgenesh1_pg.scaffold_41000065	fgenesh2_pg.scaffold_14000001
23	201	23_19	3
				mob:3	fgenesh1_pg.scaffold_85000001	fgenesh1_pg.scaffold_15000001	fgenesh2_pg.scaffold_15000002
23	201	23_20	3
				mob:3	fgenesh2_pg.scaffold_15000001	fgenesh2_pg.scaffold_27000001	fgenesh2_pg.scaffold_16000001
23	201	23_21	3
				mob:3	fgenesh1_pg.scaffold_98000001	fgenesh2_pg.scaffold_38000002	fgenesh2_pg.scaffold_98000001
23	201	23_22	3
				mob:3	fgenesh1_pg.scaffold_27000001	fgenesh2_pg.scaffold_45000052	fgenesh1_pg.scaffold_47000046
23	201	23_23	3
				mob:3	fgenesh1_pg.scaffold_10000001	fgenesh1_pg.scaffold_12000001	fgenesh1_pg.scaffold_33000001
23	201	23_24	3
				mob:3	fgenesh1_pg.scaffold_201000001	fgenesh2_pg.scaffold_6000358	fgenesh2_pg.scaffold_201000001
23	201	23_25	3
				mob:3	fgenesh2_pg.scaffold_8000001	fgenesh1_pg.scaffold_20000132	fgenesh1_pg.scaffold_18000146
23	201	23_26	2
				mob:2	fgenesh1_pg.scaffold_234000001	fgenesh2_pg.scaffold_14000232
23	201	23_27	2
				mob:2	fgenesh1_pg.scaffold_55000001	fgenesh2_pg.scaffold_88000001
23	201	23_28	2
				mob:2	fgenesh1_pg.scaffold_13000001	fgenesh1_pg.scaffold_54000012
23	201	23_29	2
				mob:2	fgenesh1_pg.scaffold_6000340	fgenesh1_pg.scaffold_14000216
23	201	23_30	2
				mob:2	fgenesh1_pg.scaffold_47000044	fgenesh1_pg.scaffold_10000236
23	201	23_31	2
				mob:2	fgenesh1_pg.scaffold_48000042	estExt_fgenesh1_pg.C_480042
23	201	23_32	2
				mob:2	fgenesh2_pg.scaffold_48000040	estExt_fgenesh2_pg.C_480040
23	201	23_33	2
				mob:2	fgenesh1_pg.scaffold_15000221	fgenesh1_pg.scaffold_38000001
23	201	23_34	2
				mob:2	fgenesh1_pg.scaffold_88000001	fgenesh2_pg.scaffold_77000003
23	201	23_35	2
				mob:2	fgenesh1_pg.scaffold_17000166	fgenesh1_pg.scaffold_18000001
23	201	23_36	2
				mob:2	fgenesh1_pg.scaffold_152000001	fgenesh2_pg.scaffold_152000001
23	201	23_37	2
				mob:2	fgenesh1_pg.scaffold_24000129	fgenesh2_pg.scaffold_24000136
23	201	23_38	2
				mob:2	fgenesh1_pg.scaffold_6000001	fgenesh2_pg.scaffold_32000002
23	201	23_39	2
				mob:2	estExt_fgenesh2_pg.C_640002	fgenesh1_pg.scaffold_9000268
23	201	23_40	2
				mob:2	fgenesh2_pg.scaffold_10000250	fgenesh2_pg.scaffold_9000282
23	201	23_41	2
				mob:2	fgenesh1_pg.scaffold_5000348	fgenesh1_pg.scaffold_85000002
23	201	23_42	2
				mob:2	fgenesh1_pg.scaffold_24000130	fgenesh1_pg.scaffold_60000001
24	199	24_1	29
				rir:26	RirG264940	RirG224950	RirG154160	RirG097410	RirG139410	RirG155340	RirG158900	RirG077120	RirG091070	RirG212490	RirG155200	RirG264770	RirG171340	RirG075870	RirG269050	RirG098670	RirG133020	RirG068040	RirG059690	RirG126520	RirG011020	RirG267840	RirG119980	RirG059110	RirG146510	RirG059630
				lab:3	e_gw1.9.1352.1	fgenesh1_pm.LG_3_#_242	Lacbi1.eu2.Lbscf0004g03060
24	199	24_2	15
				rir:15	RirG183590	RirG223760	RirG236360	RirG169510	RirG233420	RirG267820	RirG154710	RirG135600	RirG163260	RirG112690	RirG133940	RirG121280	RirG061760	RirG096000	RirG045840
24	199	24_3	10
				rir:10	RirG269090	RirG196180	RirG138400	RirG131270	RirG132620	RirG156580	RirG148840	RirG131900	RirG117050	RirG110030
24	199	24_4	9
				rir:9	RirG209200	RirG168550	RirG266810	RirG172460	RirG242910	RirG258950	RirG077160	RirG119500	RirG096090
24	199	24_5	9
				rir:7	RirG171450	RirG135550	RirG135560	RirG147300	RirG102760	RirG110760	RirG025190
				lab:2	e_gw1.13.283.1	e_gw1.7.1735.1
24	199	24_6	8
				rir:8	RirG164580	RirG200290	RirG248430	RirG170730	RirG261680	RirG125090	RirG156900	RirG108450
24	199	24_7	8
				rir:8	RirG257030	RirG200150	RirG213940	RirG188090	RirG133600	RirG131480	RirG070460	RirG059120
24	199	24_8	8
				rir:8	RirG165340	RirG129040	RirG148050	RirG123920	RirG070470	RirG098720	RirG107750	RirG039620
24	199	24_9	8
				rir:8	RirG129970	RirG129070	RirG268990	RirG257040	RirG221600	RirG096100	RirG032380	RirG055790
24	199	24_10	8
				rir:8	RirG143630	RirG164570	RirG271680	RirG209120	RirG125100	RirG123850	RirG125540	RirG012670
24	199	24_11	6
				rir:6	RirG197780	RirG075690	RirG107800	RirG150440	RirG118660	RirG121060
24	199	24_12	6
				rir:6	RirG241810	RirG132340	RirG161970	RirG126510	RirG208800	RirG076340
24	199	24_13	6
				rir:6	RirG238540	RirG156930	RirG129010	RirG132610	RirG118610	RirG076360
24	199	24_14	5
				rir:5	RirG245530	RirG169960	RirG240320	RirG138330	RirG011510
24	199	24_15	4
				rir:4	RirG151190	RirG154170	RirG049760	RirG055780
24	199	24_16	4
				rir:4	RirG053170	RirG105080	RirG148850	RirG267810
24	199	24_17	4
				rir:4	RirG244820	RirG269100	RirG269060	RirG009730
24	199	24_18	3
				rir:3	RirG209110	RirG258160	RirG215080
24	199	24_19	3
				rir:3	RirG238450	RirG209080	RirG068030
24	199	24_20	3
				rir:3	RirG125530	RirG161960	RirG024280
24	199	24_21	3
				rir:3	RirG242920	RirG244120	RirG156910
24	199	24_22	3
				rir:3	RirG101730	RirG169410	RirG263070
24	199	24_23	3
				rir:3	RirG209090	RirG251470	RirG076350
24	199	24_24	3
				rir:3	RirG110040	RirG119490	RirG084050
24	199	24_25	3
				rir:3	RirG197820	RirG217330	RirG146570
24	199	24_26	3
				rir:3	RirG243990	RirG117030	RirG102320
24	199	24_27	3
				rir:3	RirG272340	RirG255040	RirG069570
24	199	24_28	2
				rir:2	RirG258150	RirG156570
24	199	24_29	2
				rir:2	RirG125290	RirG265050
24	199	24_30	2
				rir:2	RirG265070	RirG128800
24	199	24_31	2
				rir:2	RirG147290	RirG084110
24	199	24_32	2
				rir:2	RirG125280	RirG259270
24	199	24_33	2
				rir:2	RirG221610	RirG075710
24	199	24_34	2
				rir:2	RirG077090	RirG188100
24	199	24_35	2
				rir:2	RirG257070	RirG139400
24	199	24_36	2
				rir:2	RirG244810	RirG049750
24	199	24_37	2
				rir:2	RirG225030	RirG010180
24	199	24_38	2
				rir:2	RirG121050	RirG075700
25	179	25_1	53
				rir:53	RirG184700	RirG238330	RirG238340	RirG148820	RirG180990	RirG176010	RirG146710	RirG177510	RirG177460	RirG177530	RirG243590	RirG176000	RirG170580	RirG176020	RirG252300	RirG220230	RirG209820	RirG264790	RirG252290	RirG212950	RirG239280	RirG195970	RirG243780	RirG234930	RirG175500	RirG166140	RirG021910	RirG070960	RirG119430	RirG081330	RirG086040	RirG087500	RirG071700	RirG060350	RirG078230	RirG061790	RirG055550	RirG114430	RirG050990	RirG146700	RirG077030	RirG114110	RirG087820	RirG098700	RirG142780
25	179	25_2	28
				rir:28	RirG145610	RirG196440	RirG184690	RirG184620	RirG200800	RirG209810	RirG251630	RirG218600	RirG188920	RirG209800	RirG249100	RirG195740	RirG251780	RirG243580	RirG212940	RirG151120	RirG123540	RirG070940	RirG119440	RirG119420	RirG142760	RirG082510	RirG030930	RirG103450	RirG082490	RirG099120	RirG026300	RirG003000
25	179	25_3	23
				rir:16	RirG263890	RirG103480	RirG114470	RirG189770	RirG060360	RirG177490	RirG186460	RirG186450	RirG237700	RirG175510	RirG028570	RirG099110	RirG005960	RirG023050	RirG044230	RirG007280
				lab:1	estExt_fgenesh3_kg.C_LG_3_t40311
				phb:1	fgeneshPB_pg.4__419
				rho:4	RO3G_16301	RO3G_07510	RO3G_09099	RO3G_08606
				usm:1	UM02434
25	179	25_4	10
				phb:10	estExt_fgeneshPB_pg.C_260164	fgeneshPB_pg.20__28	fgeneshPB_pg.26__147	fgeneshPB_pg.6__287	fgeneshPB_pg.15__100	fgeneshPB_pg.6__224	fgeneshPB_pg.34__97	fgeneshPB_pg.6__198	fgeneshPB_pg.7__426	fgeneshPB_pg.6__425
25	179	25_5	7
				rir:7	RirG146730	RirG176030	RirG177480	RirG114480	RirG109740	RirG112380	RirG068910
25	179	25_6	7
				rir:7	RirG255240	RirG266870	RirG251790	RirG192550	RirG118990	RirG120590	RirG186480
25	179	25_7	7
				rir:7	RirG212960	RirG169530	RirG142770	RirG024150	RirG171960	RirG133660	RirG096680
25	179	25_8	7
				rir:2	RirG203820	RirG139290
				phb:5	estExt_fgeneshPB_pg.C_20586	fgeneshPB_pg.2__596	fgeneshPB_pg.4__300	estExt_fgeneshPB_pg.C_40290	fgeneshPB_pg.4__294
25	179	25_9	6
				rir:6	RirG192570	RirG192560	RirG186490	RirG114620	RirG109760	RirG049420
25	179	25_10	4
				rir:3	RirG243600	RirG098750	RirG072450
				phb:1	fgeneshPB_pg.8__161
25	179	25_11	4
				rir:4	RirG115110	RirG137200	RirG179020	RirG068900
25	179	25_12	4
				phb:4	fgeneshPB_pg.4__297	estExt_fgeneshPB_pg.C_290125	fgeneshPB_pg.45__68	estExt_fgeneshPB_pg.C_280085
25	179	25_13	3
				rir:3	RirG169080	RirG109200	RirG125110
25	179	25_14	3
				rir:3	RirG016670	RirG062140	RirG007270
25	179	25_15	3
				rir:3	RirG209840	RirG003690	RirG001190
25	179	25_16	2
				rir:2	RirG237690	RirG272210
25	179	25_17	2
				rir:2	RirG189780	RirG137190
25	179	25_18	2
				rir:1	RirG017700
				phb:1	estExt_fgeneshPB_pg.C_40126
25	179	25_19	2
				rir:1	RirG088940
				phb:1	fgeneshPB_pg.8__430
25	179	25_20	2
				rir:2	RirG162660	RirG109750
26	175	26_1	28
				rir:28	RirG204710	RirG239620	RirG272860	RirG095640	RirG004200	RirG127480	RirG070530	RirG168950	RirG132480	RirG117880	RirG121650	RirG047790	RirG235330	RirG116500	RirG065850	RirG258610	RirG019490	RirG111130	RirG097510	RirG212540	RirG191410	RirG235320	RirG072430	RirG019470	RirG007580	RirG026960	RirG054820	RirG004780
26	175	26_2	16
				rir:16	RirG270330	RirG177580	RirG199170	RirG210250	RirG254610	RirG240110	RirG204970	RirG223750	RirG264560	RirG192170	RirG270890	RirG198510	RirG028280	RirG102450	RirG102420	RirG119580
26	175	26_3	14
				rir:14	RirG257900	RirG241830	RirG271410	RirG196380	RirG213640	RirG022100	RirG094400	RirG136220	RirG077230	RirG161050	RirG098110	RirG182650	RirG051730	RirG161630
26	175	26_4	10
				rir:10	RirG180920	RirG187260	RirG184190	RirG225430	RirG110390	RirG083230	RirG026950	RirG117860	RirG145950	RirG073580
26	175	26_5	9
				rir:9	RirG079670	RirG270440	RirG239340	RirG251130	RirG216160	RirG055720	RirG082380	RirG104060	RirG081250
26	175	26_6	7
				rir:7	RirG193390	RirG239870	RirG246120	RirG212550	RirG148700	RirG134140	RirG019480
26	175	26_7	7
				rir:7	RirG232480	RirG115750	RirG227450	RirG010100	RirG010110	RirG010990	RirG115740
26	175	26_8	6
				rir:6	RirG245940	RirG270450	RirG050700	RirG097520	RirG157640	RirG003600
26	175	26_9	5
				rir:5	RirG162990	RirG068780	RirG127460	RirG139560	RirG232470
26	175	26_10	4
				rir:4	RirG186920	RirG258770	RirG223070	RirG176800
26	175	26_11	4
				rir:4	RirG191400	RirG251140	RirG061940	RirG159940
26	175	26_12	4
				rir:4	RirG267280	RirG259880	RirG210470	RirG157070
26	175	26_13	4
				rir:4	RirG183630	RirG073510	RirG148240	RirG014900
26	175	26_14	4
				rir:4	RirG264580	RirG135090	RirG029250	RirG002550
26	175	26_15	4
				rir:4	RirG209900	RirG246110	RirG121340	RirG006430
26	175	26_16	4
				rir:4	RirG239630	RirG176790	RirG109080	RirG139590
26	175	26_17	3
				rir:3	RirG108380	RirG125610	RirG033490
26	175	26_18	3
				rir:3	RirG146890	RirG067450	RirG144280
26	175	26_19	3
				rir:3	RirG190050	RirG095650	RirG176820
26	175	26_20	3
				rir:3	RirG137930	RirG028880	RirG119790
26	175	26_21	3
				rir:3	RirG118450	RirG074290	RirG079660
26	175	26_22	3
				rir:3	RirG199330	RirG245930	RirG190060
26	175	26_23	3
				rir:3	RirG095630	RirG150610	RirG258780
26	175	26_24	3
				rir:3	RirG132490	RirG133260	RirG004790
26	175	26_25	3
				rir:3	RirG178710	RirG105140	RirG159950
26	175	26_26	3
				rir:3	RirG258760	RirG158700	RirG001720
26	175	26_27	3
				rir:3	RirG016280	RirG186930	RirG223060
26	175	26_28	2
				rir:2	RirG146360	RirG089440
26	175	26_29	2
				rir:2	RirG029260	RirG002540
26	175	26_30	2
				rir:2	RirG072440	RirG178370
26	175	26_31	2
				rir:2	RirG125600	RirG081260
26	175	26_32	2
				rir:2	RirG061030	RirG070900
26	175	26_33	2
				rir:2	RirG176810	RirG225420
27	171	27_1	55
				lab:2	fgenesh1_kg.LG_3_#_1080_#_1325787:1	gw1.3.5988.1
				mob:53	e_gw1.2.512.1	e_gw1.2.514.1	e_gw1.2.513.1	gw1.2.514.1	gw1.2.513.1	gw1.2.512.1	e_gw1.6.191.1	e_gw1.6.190.1	e_gw1.4.310.1	e_gw1.4.309.1	gw1.6.174.1	gw1.6.207.1	e_gw1.6.207.1	gw1.4.334.1	e_gw1.4.334.1	e_gw1.4.413.1	e_gw1.4.406.1	e_gw1.5.404.1	e_gw1.5.402.1	e_gw1.5.400.1	e_gw1.5.399.1	e_gw1.5.255.1	gw1.4.310.1	gw1.4.309.1	e_gw1.4.266.1	e_gw1.4.508.1	e_gw1.4.505.1	e_gw1.4.435.1	gw1.4.266.1	gw1.6.191.1	gw1.6.190.1	gw1.4.413.1	gw1.4.406.1	fgenesh1_pg.scaffold_6000095	e_gw1.6.188.1	e_gw1.6.187.1	e_gw1.5.414.1	e_gw1.5.412.1	e_gw1.5.344.1	gw1.5.255.1	e_gw1.6.306.1	e_gw1.6.278.1	e_gw1.6.307.1	gw1.5.332.1	gw1.6.188.1
27	171	27_2	24
				bad:1	BDEG_02906
				rir:1	RirG027330
				mag:2	MGG_02976	MGG_02065
				mob:14	fgenesh2_pg.scaffold_5000004	fgenesh2_pg.scaffold_6000100	e_gw1.6.56.1	gw1.6.56.1	e_gw1.5.345.1	gw1.5.345.1	fgenesh1_pg.scaffold_9000206	fgenesh2_pg.scaffold_24000080	fgenesh1_pg.scaffold_24000080	fgenesh1_pg.scaffold_2000426	gw1.5.416.1	fgenesh2_pg.scaffold_13000003	estExt_fgenesh2_pg.C_130003	fgenesh1_pg.scaffold_6000093
				nec:2	NCU03477	NCU09244
				tum:4	GSTUMG00007827001	GSTUMG00003312001	GSTUMG00004931001	GSTUMG00004933001
27	171	27_3	21
				mob:21	fgenesh1_pg.scaffold_2000421	fgenesh2_pg.scaffold_2000433	fgenesh2_pg.scaffold_4000390	fgenesh1_pg.scaffold_4000379	fgenesh2_pg.scaffold_4000400	fgenesh1_pg.scaffold_4000388	fgenesh1_pg.scaffold_12000003	fgenesh1_pg.scaffold_6000087	fgenesh2_pg.scaffold_6000093	fgenesh1_pg.scaffold_5000002	fgenesh2_pg.scaffold_40000004	fgenesh1_pg.scaffold_40000005	fgenesh2_pg.scaffold_2000438	fgenesh2_pg.scaffold_9000227	estExt_fgenesh1_pg.C_130002	fgenesh1_pg.scaffold_13000002	estExt_fgenesh1_pg.C_40375	estExt_gwp_gw1.C_40475	estExt_gwp_gw1.C_40474	estExt_fgenesh2_pg.C_40396	estExt_fgenesh1_pg.C_40384
27	171	27_4	20
				lab:6	e_gw1.3.5930.1	e_gw1.7.1164.1	gm1.3448_g	e_gw1.11.1400.1	gm1.15978_g	gw1.5.2156.1
				mob:6	gw1.4.151.1	gw1.4.143.1	e_gw1.4.151.1	e_gw1.4.143.1	e_gw1.6.174.1	e_gw1.5.332.1
				tum:8	GSTUMG00003436001	GSTUMG00007830001	GSTUMG00007826001	GSTUMG00007839001	GSTUMG00004133001	GSTUMG00007818001	GSTUMG00004930001	GSTUMG00011083001
27	171	27_5	18
				lab:10	e_gw1.1.4790.1	e_gw1.6.2579.1	gw1.8.554.1	gw1.18.196.1	gw1.1.4472.1	e_gw1.11.900.1	e_gw1.3.6542.1	e_gw1.7.1171.1	e_gw1.10.1431.1	e_gw1.7.1176.1
				mob:3	fgenesh2_pg.scaffold_12000004	fgenesh2_pg.scaffold_5000007	fgenesh1_pg.scaffold_5000004
				tum:5	GSTUMG00002767001	GSTUMG00007824001	GSTUMG00007821001	GSTUMG00009745001	GSTUMG00011080001
27	171	27_6	15
				lab:14	Lacbi1.Eugenev2.0000010895	Lacbi1.UKU_fgenesh3_pg.C_scaffold_3000182	Lacbi1.UKU_eu2.Lbscf0016g00630	fgenesh1_kg.LG_1_#_1164_#_399888	gm1.9771_g	gm1.9834_g	gw1.1.6312.1	e_gw1.13.797.1	gm1.6770_g	gm1.6777_g	gm1.3106_g	gm1.3770_g	gm1.13228_g	fgenesh1_kg.LG_5_#_220_#_399898
				tum:1	GSTUMG00011311001
27	171	27_7	12
				lab:1	gm1.2206_g
				mob:11	gw1.4.435.1	e_gw1.5.416.1	e_gw1.5.256.1	gw1.6.307.1	gw1.5.256.1	gw1.4.508.1	gw1.4.505.1	gw1.5.344.1	gw1.5.414.1	gw1.5.412.1	gw1.6.306.1
27	171	27_8	6
				lab:5	Lacbi1.UKU_Eugenev2.0000040013	fgenesh1_kg.LG_4_#_313_#_399900	fgenesh2_kg.17_#_11_#_399902	fgenesh2_kg.LG_9_#_151_#_399902	fgenesh2_kg.LG_1_#_654_#_399893
				nec:1	NCU07463
28	170	28_1	29
				lab:29	Lacbi1.fgenesh3_pg.C_scaffold_29000012	Lacbi1.eu2.Lbscf0039g00230	Lacbi1.fgenesh3_pg.C_scaffold_16000170	e_gw1.1.3109.1	fgenesh1_kg.11_#_73_#_335226	e_gw1.5.2390.1	gm1.6220_g	gm1.8933_g	Lacbi1.eu2.Lbscf0003g00390	e_gw1.5.872.1	fgenesh1_pm.LG_1_#_2209	e_gw1.4.3207.1	gw1.4.3593.1	fgenesh1_pm.LG_1_#_1951	Lacbi1.eu2.Lbscf0028g01420	gm1.9554_g	gm1.2937_g	gw1.13.1514.1	Lacbi1.eu2.Lbscf0015g00620	Lacbi1.eu2.Lbscf0053g00480	gw1.14.315.1	Lacbi1.eu2.Lbscf0090g00260	e_gw1.1.10504.1	e_gw1.1.2542.1	e_gw1.4.2797.1	e_gw1.1.4780.1	e_gw1.1.5882.1	e_gw1.3.7720.1	e_gw1.4.4365.1
28	170	28_2	16
				lab:16	Lacbi1.eu2.Lbscf0013g00890	Lacbi1.fgenesh3_pg.C_scaffold_26000088	Lacbi1.eu2.Lbscf0017g00900	e_gw1.1.12328.1	e_gw1.19.710.1	e_gw1.1.16157.1	gm1.10378_g	gm1.13144_g	gm1.16635_g	e_gw1.1.9902.1	gm1.15287_g	e_gw1.12.1986.1	gm1.13535_g	gm1.18277_g	e_gw1.2.5437.1	gm1.13338_g
28	170	28_3	16
				lab:16	Lacbi1.fgenesh3_pg.C_scaffold_74000017	Lacbi1.fgenesh3_pg.C_scaffold_79000031	fgenesh3_kg.LG_7_#_772_#_335226	fgenesh1_kg.LG_10_#_355_#_335226	fgenesh1_kg.12_#_206_#_335226	fgenesh3_kg.LG_4_#_1137_#_335226	fgenesh3_kg.LG_2_#_266_#_335226	fgenesh1_kg.LG_3_#_881_#_335226	fgenesh1_kg.LG_1_#_1586_#_335226	fgenesh1_kg.13_#_66_#_335226	fgenesh3_kg.LG_10_#_171_#_335226	fgenesh2_kg.LG_9_#_105_#_335226	fgenesh1_kg.20_#_87_#_335226	fgenesh2_kg.LG_6_#_52_#_335226	fgenesh1_kg.LG_6_#_77_#_335226	fgenesh1_kg.13_#_64_#_335226
28	170	28_4	12
				lab:12	gw1.1.13213.1	gm1.15288_g	gm1.11589_g	gw1.23.279.1	Lacbi1.eu2.Lbscf0051g00750	e_gw1.10.4359.1	e_gw1.10.5170.1	e_gw1.10.786.1	Lacbi1.eu2.Lbscf0043g00240	e_gw1.3.6859.1	e_gw1.7.2215.1	e_gw1.26.67.1
28	170	28_5	9
				lab:9	Lacbi1.eu2.Lbscf0074g00040	Lacbi1.eu2.Lbscf0090g00250	Lacbi1.fgenesh3_pg.C_scaffold_3000103	e_gw1.9.1153.1	e_gw1.26.105.1	e_gw1.7.2246.1	e_gw1.3.5894.1	e_gw1.3.7520.1	e_gw1.38.26.1
28	170	28_6	9
				lab:9	Lacbi1.fgenesh3_pg.C_scaffold_2000121	Lacbi1.fgenesh3_pg.C_scaffold_60000006	Lacbi1.fgenesh3_pg.C_scaffold_10000298	Lacbi1.fgenesh3_pg.C_scaffold_27000002	e_gw1.1.15087.1	e_gw1.3.6954.1	e_gw1.7.2135.1	gm1.15380_g	e_gw1.9.2462.1
28	170	28_7	7
				lab:7	fgenesh1_pm.LG_10_#_59	gm1.13592_g	e_gw1.3.8386.1	gm1.3370_g	gm1.6225_g	e_gw1.5.1129.1	e_gw1.35.26.1
28	170	28_8	6
				lab:6	Lacbi1.eu2.Lbscf0166g00010	e_gw1.23.401.1	gw1.3.2637.1	gm1.9542_g	e_gw1.5.3702.1	e_gw1.15.692.1
28	170	28_9	6
				lab:6	Lacbi1.fgenesh3_pg.C_scaffold_28000100	gw1.24.415.1	e_gw1.5.873.1	e_gw1.3.9887.1	gm1.8560_g	e_gw1.7.114.1
28	170	28_10	6
				lab:6	Lacbi1.fgenesh3_pg.C_scaffold_23000113	e_gw1.2.12.1	gm1.18318_g	e_gw1.14.133.1	gm1.10304_g	e_gw1.3.4302.1
28	170	28_11	5
				lab:5	Lacbi1.fgenesh3_pg.C_scaffold_27000129	e_gw1.3.2412.1	e_gw1.6.147.1	gm1.17427_g	e_gw1.1.8298.1
28	170	28_12	5
				lab:5	gm1.10072_g	e_gw1.7.684.1	gm1.9271_g	gm1.11588_g	gm1.3728_g
28	170	28_13	4
				lab:4	Lacbi1.fgenesh3_pg.C_scaffold_44000079	gm1.2312_g	e_gw1.3.7630.1	gm1.13368_g
28	170	28_14	4
				lab:4	Lacbi1.fgenesh3_pg.C_scaffold_30000003	Lacbi1.fgenesh3_pg.C_scaffold_5000604	gm1.13361_g	gm1.10135_g
28	170	28_15	4
				lab:4	Lacbi1.fgenesh3_pg.C_scaffold_12000001	gm1.2539_g	gm1.5284_g	gm1.9550_g
28	170	28_16	4
				lab:4	e_gw1.19.550.1	e_gw1.6.4179.1	e_gw1.4.4018.1	e_gw1.1.11352.1
28	170	28_17	3
				lab:3	Lacbi1.fgenesh3_pg.C_scaffold_470000001	Lacbi1.eu2.Lbscf0032g01980	e_gw1.3.10004.1
28	170	28_18	3
				lab:3	Lacbi1.eu2.Lbscf0053g00070	gw1.4.5068.1	e_gw1.13.1610.1
28	170	28_19	2
				lab:2	Lacbi1.eu2.Lbscf0028g01410	e_gw1.23.7.1
28	170	28_20	2
				lab:2	Lacbi1.eu2.Lbscf0039g00240	gw1.26.28.1
28	170	28_21	2
				lab:2	Lacbi1.eu2.Lbscf0024g00800	Lacbi1.fgenesh3_pg.C_scaffold_14000139
28	170	28_22	2
				lab:2	e_gw1.7.1055.1	gm1.305_g
28	170	28_23	2
				lab:2	gm1.12815_g	gm1.10007_g
28	170	28_24	2
				lab:2	Lacbi1.eu2.Lbscf0035g02060	e_gw1.1.11748.1
28	170	28_25	2
				lab:2	gm1.18282_g	e_gw1.5.2435.1
28	170	28_26	2
				lab:2	gm1.18058_g	gm1.10008_g
28	170	28_27	2
				lab:2	gm1.18350_g	Lacbi1.eu2.Lbscf0037g00220
28	170	28_28	2
				lab:2	e_gw1.13.1722.1	e_gw1.7.2049.1
28	170	28_29	2
				lab:2	gm1.10362_g	gw1.23.345.1
29	165	29_1	37
				rir:37	RirG263710	RirG254340	RirG082680	RirG107880	RirG139250	RirG181660	RirG173890	RirG186010	RirG023850	RirG196980	RirG080990	RirG026470	RirG078320	RirG191230	RirG120010	RirG238050	RirG272450	RirG046070	RirG228640	RirG220150	RirG240400	RirG186000	RirG040810	RirG027600	RirG114520	RirG212560	RirG035970	RirG243970	RirG161500	RirG105920	RirG136100	RirG040820	RirG145040	RirG145060	RirG210140	RirG100950	RirG063050
29	165	29_2	29
				rir:29	RirG074480	RirG100340	RirG273010	RirG181200	RirG220810	RirG197490	RirG132730	RirG027630	RirG126070	RirG100330	RirG015030	RirG020640	RirG138090	RirG186080	RirG000970	RirG004660	RirG186030	RirG124950	RirG256610	RirG116670	RirG020580	RirG114800	RirG005050	RirG186040	RirG076220	RirG020650	RirG256600	RirG131560	RirG033620
29	165	29_3	17
				rir:17	RirG100350	RirG185610	RirG145030	RirG235280	RirG137500	RirG186070	RirG052770	RirG161490	RirG145050	RirG082470	RirG100940	RirG191090	RirG210150	RirG136110	RirG161030	RirG160750	RirG003200
29	165	29_4	10
				rir:10	RirG257600	RirG053670	RirG248740	RirG100450	RirG027580	RirG241920	RirG251450	RirG099460	RirG040830	RirG027610
29	165	29_5	9
				rir:9	RirG083210	RirG268490	RirG158070	RirG107600	RirG190690	RirG100300	RirG047800	RirG087150	RirG180680
29	165	29_6	7
				rir:7	RirG200930	RirG233820	RirG223120	RirG162270	RirG146530	RirG072460	RirG245710
29	165	29_7	7
				rir:7	RirG268470	RirG203200	RirG248720	RirG158060	RirG074470	RirG120020	RirG073900
29	165	29_8	6
				rir:6	RirG110540	RirG099440	RirG162520	RirG148960	RirG066710	RirG124940
29	165	29_9	6
				rir:6	RirG248730	RirG134360	RirG235270	RirG241910	RirG161040	RirG191100
29	165	29_10	6
				rir:6	RirG251460	RirG065650	RirG087160	RirG078940	RirG084430	RirG047810
29	165	29_11	4
				rir:4	RirG113020	RirG184640	RirG076060	RirG105770
29	165	29_12	4
				rir:4	RirG256590	RirG106340	RirG116330	RirG261800
29	165	29_13	3
				rir:3	RirG027570	RirG083220	RirG273020
29	165	29_14	3
				rir:3	RirG184650	RirG099430	RirG223250
29	165	29_15	3
				rir:3	RirG197500	RirG161120	RirG022070
29	165	29_16	3
				rir:3	RirG241900	RirG121460	RirG100310
29	165	29_17	3
				rir:3	RirG138080	RirG020660	RirG019810
29	165	29_18	2
				rir:2	RirG020160	RirG243800
29	165	29_19	2
				rir:2	RirG268480	RirG223240
29	165	29_20	2
				rir:2	RirG236870	RirG160760
29	165	29_21	2
				rir:2	RirG027620	RirG261790
30	163	30_1	32
				phb:12	fgeneshPB_pg.4__128	fgeneshPB_pg.12__82	fgeneshPB_pg.34__46	fgeneshPB_pg.22__85	fgeneshPB_pg.3__745	fgeneshPB_pg.17__134	fgeneshPB_pg.63__10	fgeneshPB_pg.77__20	fgeneshPB_pg.25__27	fgeneshPB_pg.9__262	fgeneshPB_pg.5__525	fgeneshPB_pg.40__104
				rho:20	RO3G_06849	RO3G_13415	RO3G_16388	RO3G_09261	RO3G_07170	RO3G_02147	RO3G_16494	RO3G_11032	RO3G_10870	RO3G_12429	RO3G_05412	RO3G_06407	RO3G_09050	RO3G_17020	RO3G_04316	RO3G_12278	RO3G_10310	RO3G_08427	RO3G_08845	RO3G_16014
30	163	30_2	17
				rho:17	RO3G_15719	RO3G_15710	RO3G_15077	RO3G_10583	RO3G_07566	RO3G_15418	RO3G_01425	RO3G_03120	RO3G_13806	RO3G_16566	RO3G_14533	RO3G_15712	RO3G_11523	RO3G_13797	RO3G_16106	RO3G_10032	RO3G_15110
30	163	30_3	12
				phb:12	fgeneshPB_pg.11__163	fgeneshPB_pg.16__267	fgeneshPB_pg.8__150	fgeneshPB_pg.16__217	fgeneshPB_pg.8__270	fgeneshPB_pg.3__152	fgeneshPB_pg.34__148	fgeneshPB_pg.33__34	fgeneshPB_pg.19__93	fgeneshPB_pg.62__8	fgeneshPB_pg.77__19	fgeneshPB_pg.75__35
30	163	30_4	7
				phb:1	fgeneshPB_pg.12__93
				rho:6	RO3G_00792	RO3G_09088	RO3G_08666	RO3G_14212	RO3G_14209	RO3G_09100
[truncated: 86,564 more rows]
[truncated: 131 more columns]

## Sheet: orthoMCL cluster metadata
Table S3: Putative orthology groups (metadata)
		Number of members for each species											Functinal annotations
GroupID	GroupSize	Rir	Sac	Nec	Tum	Lab	Usm	Rho	Phb	Bad	Mag	Mob	GO	InterPro	SGD
1	919	918	0	0	0	0	0	1	0	0	0	0	GO:0003824=>catalytic activity=>po22_popja ame: full=retrovirus-related pol polyprotein from type-1 retrotransposable element r2 ame: full=retrovirus-related pol polyprotein from type i retrotransposable element r2 includes: ame: full=reverse transcriptase includes: ame: full=endonuclease)	IPR015706 (RNA-directed DNA polymerase (reverse transcriptase)) IPR000477 (Reverse transcriptase) IPR005135 (Endonuclease/exonuclease/phosphatase) IPR012337 (Ribonuclease H-like) IPR015706 (RNA-directed DNA polymerase (reverse transcriptase)) IPR002156 (Ribonuclease H domain) IPR018527 (Rubredoxin, iron-binding site)
2	493	1	0	0	0	1	0	491	0	0	0	0	GO:0006259=>DNA metabolic process=>tc1a_caeel ame: full=transposable element tc1 transposase)
3	397	0	0	0	0	0	0	395	2	0	0	0
4	383	0	0	0	0	0	0	312	71	0	0	0
5	382	44	0	0	0	4	0	158	176	0	0	0		IPR004242 (Transposon, En/Spm-like)
6	380	380	0	0	0	0	0	0	0	0	0	0	GO:0005488=>binding=>kbtb5_xentr ame: full=kelch repeat and btb domain-containing protein 5) GO:0009987=>cellular process=>kbtba_human ame: full=kelch repeat and btb domain-containing protein 10 ame: full=kel-like protein 23 ame: full=kelch-related protein 1 ame: full=sarcosin GO:0043229=>intracellular organelle=>kbtba_human ame: full=kelch repeat and btb domain-containing protein 10 ame: full=ke…	IPR011333 (BTB/POZ fold IPR013089 (Kelch-related) IPR006571 (TLDc IPR000772 (Ricin B lectin IPR000433 (Zinc finger, ZZ-type IPR011705 (BTB/Kelch-associated) IPR013089 (Kelch-related) IPR005225 (Small GTP-binding protein
7	362	362	0	0	0	0	0	0	0	0	0	0	GO:0004674=>protein serine/threonine kinase activity=>yr826_mimiv ame: full= serine threonine-protein kinase receptor r826 flags: precursor GO:0005622=>intracellular=>yr826_mimiv ame: full= serine threonine-protein kinase receptor r826 flags: precursor GO:0007050=>cell cycle arrest=>yr826_mimiv ame: full= serine threonine-protein kinase receptor r826 flags: precursor GO:0007254=>JNK cascade=>yr82…
8	361	361	0	0	0	0	0	0	0	0	0	0	GO:0000165=>MAPK cascade=>ybeq_ecoli ame: full=uncharacterized protein GO:0004672=>protein kinase activity=>ybeq_ecoli ame: full=uncharacterized protein GO:0005515=>protein binding=>ybeq_ecoli ame: full=uncharacterized protein GO:0005737=>cytoplasm=>ybeq_ecoli ame: full=uncharacterized protein GO:0009967=>positive regulation of signal transduction=>ybeq_ecoli ame: full=uncharacterized protein GO:…
9	352	352	0	0	0	0	0	0	0	0	0	0		IPR022364 (F-box domain, Skp2-like)
10	317	0	0	0	0	0	0	0	0	1	0	316
11	302	302	0	0	0	0	0	0	0	0	0	0	GO:0004672=>protein kinase activity=>roco4_dicdi ame: full=probable serine threonine-protein kinase roco4 ame: full=ras of complex proteins and c-terminal of roc 4 GO:0005515=>protein binding=>roco4_dicdi ame: full=probable serine threonine-protein kinase roco4 ame: full=ras of complex proteins and c-terminal of roc 4 GO:0005737=>cytoplasm=>roco4_dicdi ame: full=probable serine threonine-protein …
12	300	0	0	0	0	0	0	0	0	0	0	300
13	296	296	0	0	0	0	0	0	0	0	0	0	GO:0005488=>binding=>gdt2_dicdi ame: full=probable serine threonine-protein kinase gdt2 ame: full=growth-differentiation transition protein 2 flags: precursor GO:0007049=>cell cycle=>gdt2_dicdi ame: full=probable serine threonine-protein kinase gdt2 ame: full=growth-differentiation transition protein 2 flags: precursor GO:0016301=>kinase activity=>gdt2_dicdi ame: full=probable serine threonine-pr…
14	291	291	0	0	0	0	0	0	0	0	0	0	GO:0000165=>MAPK cascade=>ytyk2_dicdi ame: full=probable tyrosine-protein kinase ddb_g0283397 GO:0004674=>protein serine/threonine kinase activity=>ytyk2_dicdi ame: full=probable tyrosine-protein kinase ddb_g0283397 GO:0006468=>protein phosphorylation=>ytyk2_dicdi ame: full=probable tyrosine-protein kinase ddb_g0283397 GO:0019899=>enzyme binding=>ytyk2_dicdi ame: full=probable tyrosine-protein ki…
15	278	278	0	0	0	0	0	0	0	0	0	0	GO:0009987=>cellular process=>muc5a_human ame: full=mucin-5ac short=muc-5ac ame: full=gastric mucin ame: full=lewis b blood group antigen short= ame: full=major airway glycoprotein ame: full=mucin-5 subtype tracheobronchial ame: full=tracheobronchial mucin short=tbm flags: precursor)	IPR012677 (Nucleotide-binding, alpha-beta plait) IPR000504 (RNA recognition motif domain)
16	274	265	0	0	0	9	0	0	0	0	0	0	GO:0005488=>binding=>fhy3_arath ame: full=protein far-red elongated hypocotyl 3 GO:0006950=>response to stress=>fhy3_arath ame: full=protein far-red elongated hypocotyl 3 GO:0007049=>cell cycle=>fhy3_arath ame: full=protein far-red elongated hypocotyl 3 GO:0007623=>circadian rhythm=>fhy3_arath ame: full=protein far-red elongated hypocotyl 3 GO:0009605=>response to external stimulus=>fhy3_arath am…	IPR004330 (Transcription factor, FAR1-related IPR007527 (Zinc finger, SWIM-type IPR018289 (MULE transposase, conserved domain) IPR001878 (Zinc finger, CCHC-type) IPR007527 (Zinc finger, SWIM-type IPR001207 (Transposase, mutator type) IPR013084 (Zinc finger, CCHC retroviral-type) IPR010106 (Conserved hypothetical protein CHP01784)
17	262	0	0	0	0	0	0	0	262	0	0	0
18	252	252	0	0	0	0	0	0	0	0	0	0	GO:0003006=>developmental process involved in reproduction=>btbd2_human ame: full=btb poz domain-containing protein 2 GO:0044707=>single-multicellular organism process=>btbd2_human ame: full=btb poz domain-containing protein 2 GO:0048856=>anatomical structure development=>btbd2_human ame: full=btb poz domain-containing protein 2) GO:0005737=>cytoplasm=>btbd3_mouse ame: full=btb poz domain-contain…	IPR011333 (BTB/POZ fold IPR013089 (Kelch-related) IPR006571 (TLDc IPR013089 (Kelch-related)
19	249	0	0	0	0	0	0	0	0	0	0	249
20	236	236	0	0	0	0	0	0	0	0	0	0		IPR022364 (F-box domain, Skp2-like)
21	214	0	0	0	0	0	0	214	0	0	0	0
22	211	211	0	0	0	0	0	0	0	0	0	0	GO:0000166=>nucleotide binding=>yr831_mimiv ame: full= serine threonine-protein kinase receptor r831 flags: precursor GO:0000186=>activation of MAPKK activity=>yr831_mimiv ame: full= serine threonine-protein kinase receptor r831 flags: precursor GO:0000187=>activation of MAPK activity=>yr831_mimiv ame: full= serine threonine-protein kinase receptor r831 flags: precursor GO:0001819=>positive regul…
23	201	0	0	0	0	1	0	0	0	0	0	200
24	199	194	0	0	0	5	0	0	0	0	0	0		IPR008906 (HAT dimerisation IPR012337 (Ribonuclease H-like) IPR012337 (Ribonuclease H-like) IPR007021 (Domain of unknown function DUF659 IPR003656 (Zinc finger, BED-type predicted) IPR007087 (Zinc finger, C2H2-type)
25	179	150	0	0	0	1	1	4	23	0	0	0	GO:0000123=>histone acetyltransferase complex=>hcfc1_human ame: full=host cell factor 1 short=hcf short=hcf-1 ame: full=c1 factor ame: full=cff ame: full=vcaf ame: full=vp16 accessory protein contains: ame: full=hcf n-terminal chain 1 contains: ame: full=hcf n-terminal chain 2 contains: ame: full=hcf n-terminal chain 3 contains: ame: full=hcf n-terminal chain 4 contains: ame: full=hcf n-terminal …	IPR015915 (Kelch-type beta propeller) IPR011043 (Galactose oxidase/kelch, beta-propeller) IPR015916 (Galactose oxidase, beta-propeller) IPR015916 (Galactose oxidase, beta-propeller) IPR001899 (Surface protein from Gram-positive cocci IPR011009 (Protein kinase-like domain IPR006652 (Kelch repeat type 1)
26	175	175	0	0	0	0	0	0	0	0	0	0
27	171	1	0	3	18	38	0	0	0	1	2	108	GO:0002009=>morphogenesis of an epithelium=>klc1_ponab ame: full=kinesin light chain 1 short=klc 1 GO:0003777=>microtubule motor activity=>klc1_ponab ame: full=kinesin light chain 1 short=klc 1 GO:0005875=>microtubule associated complex=>klc1_ponab ame: full=kinesin light chain 1 short=klc 1 GO:0007389=>pattern specification process=>klc1_ponab ame: full=kinesin light chain 1 short=klc 1 GO:00080…	IPR011990 (Tetratricopeptide-like helical)
28	170	0	0	0	0	170	0	0	0	0	0	0
29	165	165	0	0	0	0	0	0	0	0	0	0	GO:0005488=>binding=>lrrx1_dicdi ame: full= leucine-rich repeat-containing protein ddb_g0290503 GO:0005856=>cytoskeleton=>lrrx1_dicdi ame: full= leucine-rich repeat-containing protein ddb_g0290503 GO:0006464=>cellular protein modification process=>lrrx1_dicdi ame: full= leucine-rich repeat-containing protein ddb_g0290503 GO:0016874=>ligase activity=>lrrx1_dicdi ame: full= leucine-rich repeat-cont…	IPR005821 (Ion transport IPR015943 (WD40/YVTN repeat-like-containing domain) IPR015943 (WD40/YVTN repeat-like-containing domain) IPR006970 (PT repeat IPR011044 (Quinoprotein amine dehydrogenase, beta chain-like) IPR011042 (Six-bladed beta-propeller, TolB-like IPR011991 (Winged helix-turn-helix transcription repressor DNA-binding) IPR011046 (WD40 repeat-like-containing domain)
30	163	0	0	0	0	0	0	102	61	0	0	0
31	160	0	0	0	0	0	0	0	0	160	0	0
32	159	159	0	0	0	0	0	0	0	0	0	0
33	159	0	0	0	0	1	0	0	0	0	0	158
34	158	0	0	0	0	0	0	0	158	0	0	0
35	151	151	0	0	0	0	0	0	0	0	0	0		IPR001810 (F-box domain, cyclin-like) IPR022364 (F-box domain, Skp2-like)
36	151	0	0	0	0	1	1	145	4	0	0	0
37	147	0	0	0	0	0	0	0	0	147	0	0
38	147	121	0	3	4	1	0	3	13	0	2	0	GO:0005488=>binding=>hs12a_human ame: full=heat shock 70 kda protein 12a) GO:0006950=>response to stress=>hs12a_mouse ame: full=heat shock 70 kda protein 12a GO:0009987=>cellular process=>hs12a_mouse ame: full=heat shock 70 kda protein 12a GO:0043229=>intracellular organelle=>hs12a_mouse ame: full=heat shock 70 kda protein 12a GO:0044444=>cytoplasmic part=>hs12a_mouse ame: full=heat shock 70 kda …	IPR001023 (Heat shock protein Hsp70) IPR013126 (Heat shock protein 70) IPR009053 (Prefoldin IPR010989 (t-SNARE) IPR003106 (Leucine zipper, homeobox-associated)
39	147	0	0	0	0	0	0	0	147	0	0	0
40	146	146	0	0	0	0	0	0	0	0	0	0		IPR001878 (Zinc finger, CCHC-type) IPR005162 (Retrotransposon gag protein) IPR005162 (Retrotransposon gag protein) IPR000014 (PAS
41	142	142	0	0	0	0	0	0	0	0	0	0
42	141	141	0	0	0	0	0	0	0	0	0	0	GO:0004672=>protein kinase activity=>y1199_dicdi ame: full=probable serine threonine-protein kinase ddb_g0282895 GO:0005515=>protein binding=>y1199_dicdi ame: full=probable serine threonine-protein kinase ddb_g0282895 GO:0016310=>phosphorylation=>y1199_dicdi ame: full=probable serine threonine-protein kinase ddb_g0282895 GO:0035556=>intracellular signal transduction=>y1199_dicdi ame: full=probabl…	IPR011009 (Protein kinase-like domain) IPR020685 (Tyrosine-protein kinase) IPR002591 (Type I phosphodiesterase/nucleotide pyrophosphatase/phosphate transferase IPR011009 (Protein kinase-like domain) IPR015786 (Mitogen activated protein kinase kinase kinase-related) IPR020636 (Calcium/calmodulin-dependent protein kinase-like)
43	140	9	6	6	4	9	7	7	12	17	6	57	GO:0005515=>protein binding=>ybt1_yeast ame: full=atp-dependent bile acid permease GO:0005634=>nucleus=>ybt1_yeast ame: full=atp-dependent bile acid permease GO:0006950=>response to stress=>ybt1_yeast ame: full=atp-dependent bile acid permease GO:0008152=>metabolic process=>ybt1_yeast ame: full=atp-dependent bile acid permease GO:0014070=>response to organic cyclic compound=>ybt1_yeast ame: full=…	IPR003593 (ATPase, AAA+ type, core IPR011527 (ABC transporter, transmembrane domain, type 1)	Vacuolar membrane protein involved in multiple drug resistance and metal sensitivity; ATP-binding cassette (ABC) family member involved in drug transport; potential Cdc28p substrate; induced under respiratory conditions Plasma membrane ATP-binding cassette (ABC) transporter, multidrug transporter mediates export of many different organic anions including oligomycin; similar to human cystic fibros…
44	138	138	0	0	0	0	0	0	0	0	0	0	GO:0000122=>negative regulation of transcription from RNA polymerase II promoter=>ubc4_schpo ame: full=ubiquitin-conjugating enzyme e2 4 ame: full=ubiquitin carrier protein 4 ame: full=ubiquitin-protein ligase 4 GO:0004842=>ubiquitin-protein ligase activity=>ubc4_schpo ame: full=ubiquitin-conjugating enzyme e2 4 ame: full=ubiquitin carrier protein 4 ame: full=ubiquitin-protein ligase 4 GO:0005524…	IPR007021 (Domain of unknown function DUF659 IPR012337 (Ribonuclease H-like) IPR012337 (Ribonuclease H-like IPR003656 (Zinc finger, BED-type predicted) IPR008906 (HAT dimerisation
45	132	0	0	0	0	0	0	130	2	0	0	0
46	132	132	0	0	0	0	0	0	0	0	0	0		IPR001878 (Zinc finger, CCHC-type) IPR000048 (IQ motif, EF-hand binding site)
47	131	1	1	1	1	4	1	1	1	13	1	106	GO:0000226=>microtubule cytoskeleton organization=>dyhc_neucr ame: full=dynein heavy cytoplasmic ame: full=dynein heavy cytosolic short=dyhc GO:0000278=>mitotic cell cycle=>dyhc_neucr ame: full=dynein heavy cytoplasmic ame: full=dynein heavy cytosolic short=dyhc GO:0003006=>developmental process involved in reproduction=>dyhc_neucr ame: full=dynein heavy cytoplasmic ame: full=dynein heavy cytosol…	IPR013594 (Dynein heavy chain, N-terminal domain-1)	Cytoplasmic heavy chain dynein, microtubule motor protein, required for anaphase spindle elongation; involved in spindle assembly, chromosome movement, and spindle orientation during cell division, targeted to microtubule tips by Pac1p
48	129	129	0	0	0	0	0	0	0	0	0	0	GO:0009507=>chloroplast=>ycf1_pinko ame: full= protein ycf1 ame: full=orf575)	IPR015943 (WD40/YVTN repeat-like-containing domain) IPR005821 (Ion transport) IPR015943 (WD40/YVTN repeat-like-containing domain)
49	129	0	0	0	0	0	0	28	101	0	0	0
50	128	128	0	0	0	0	0	0	0	0	0	0	GO:0010413=>glucuronoxylan metabolic process=>klh23_mouse ame: full=kelch-like protein 23 GO:0045492=>xylan biosynthetic process=>klh23_mouse ame: full=kelch-like protein 23) GO:0009814=>defense response, incompatible interaction=>kbtb8_danre ame: full=kelch repeat and btb domain-containing protein 8 ame: full=t-cell activation kelch repeat protein short=ta-krp GO:0042221=>response to chemical st…	IPR003877 (SPla/RYanodine receptor SPRY IPR008985 (Concanavalin A-like lectin/glucanase IPR001870 (B302/SPRY domain IPR008985 (Concanavalin A-like lectin/glucanase IPR011333 (BTB/POZ fold
51	128	13	0	0	0	2	0	0	113	0	0	0	GO:0001819=>positive regulation of cytokine production=>ybeq_ecoli ame: full=uncharacterized protein GO:0002224=>toll-like receptor signaling pathway=>ybeq_ecoli ame: full=uncharacterized protein GO:0005515=>protein binding=>ybeq_ecoli ame: full=uncharacterized protein GO:0006139=>nucleobase-containing compound metabolic process=>ybeq_ecoli ame: full=uncharacterized protein GO:0006468=>protein ph…	IPR004242 (Transposon, En/Spm-like IPR009667 (Protein of unknown function DUF1258)
52	126	0	0	0	0	126	0	0	0	0	0	0
53	123	0	0	0	0	10	1	0	0	111	1	0
54	123	123	0	0	0	0	0	0	0	0	0	0
55	123	122	0	1	0	0	0	0	0	0	0	0
56	121	121	0	0	0	0	0	0	0	0	0	0	GO:0003006=>developmental process involved in reproduction=>kbtba_human ame: full=kelch repeat and btb domain-containing protein 10 ame: full=kel-like protein 23 ame: full=kelch-related protein 1 ame: full=sarcosin GO:0009987=>cellular process=>kbtba_human ame: full=kelch repeat and btb domain-containing protein 10 ame: full=kel-like protein 23 ame: full=kelch-related protein 1 ame: full=sarcosin…	IPR006571 (TLDc IPR011333 (BTB/POZ fold IPR011333 (BTB/POZ fold IPR013089 (Kelch-related)
57	119	119	0	0	0	0	0	0	0	0	0	0	GO:0009987=>cellular process=>ybeq_ecoli ame: full=uncharacterized protein GO:0050896=>response to stimulus=>ybeq_ecoli ame: full=uncharacterized protein) GO:0043231=>intracellular membrane-bounded organelle=>ybeq_ecoli ame: full=uncharacterized protein GO:0044444=>cytoplasmic part=>ybeq_ecoli ame: full=uncharacterized protein) GO:0006915=>apoptotic process=>yr815_mimiv ame: full= sel1-like repea…	IPR011990 (Tetratricopeptide-like helical) IPR011009 (Protein kinase-like domain IPR011990 (Tetratricopeptide-like helical)
58	119	0	0	0	0	119	0	0	0	0	0	0
59	118	118	0	0	0	0	0	0	0	0	0	0	GO:0001819=>positive regulation of cytokine production=>ripk1_human ame: full=receptor-interacting serine threonine-protein kinase 1 ame: full=cell death protein rip ame: full=receptor-interacting protein 1 short=rip-1 ame: full=serine threonine-protein kinase rip GO:0002224=>toll-like receptor signaling pathway=>ripk1_human ame: full=receptor-interacting serine threonine-protein kinase 1 ame: fu…
60	114	114	0	0	0	0	0	0	0	0	0	0	GO:0004713=>protein tyrosine kinase activity=>mlkl_human ame: full=mixed lineage kinase domain-like protein GO:0005515=>protein binding=>mlkl_human ame: full=mixed lineage kinase domain-like protein GO:0005634=>nucleus=>mlkl_human ame: full=mixed lineage kinase domain-like protein GO:0005856=>cytoskeleton=>mlkl_human ame: full=mixed lineage kinase domain-like protein GO:0005886=>plasma membrane=>…
61	113	113	0	0	0	0	0	0	0	0	0	0		IPR022364 (F-box domain, Skp2-like) IPR001810 (F-box domain, cyclin-like) IPR001841 (Zinc finger, RING-type IPR003111 (Peptidase S16, lon N-terminal
62	112	112	0	0	0	0	0	0	0	0	0	0
63	106	106	0	0	0	0	0	0	0	0	0	0	GO:0044464=>cell part=>y4759_arath ame: full=web family protein chloroplastic flags: precursor)	IPR022056 (CpG binding protein, C-terminal)
64	105	1	1	0	0	0	0	1	1	1	0	100	GO:0005634=>nucleus=>dpp8_human ame: full=dipeptidyl peptidase 8 short=dp8 ame: full=dipeptidyl peptidase iv-related protein 1 short=dprp-1 ame: full=dipeptidyl peptidase viii short=dpp viii ame: full=prolyl dipeptidase dpp8 GO:0005737=>cytoplasm=>dpp8_human ame: full=dipeptidyl peptidase 8 short=dp8 ame: full=dipeptidyl peptidase iv-related protein 1 short=dprp-1 ame: full=dipeptidyl peptidase v…	IPR001375 (Peptidase S9, prolyl oligopeptidase, catalytic domain IPR002469 (Peptidase S9B, dipeptidylpeptidase IV N-terminal)	Dipeptidyl aminopeptidase, Golgi integral membrane protein that cleaves on the carboxyl side of repeating -X-Ala- sequences, required for maturation of alpha factor, transcription is induced by a-factor
65	102	96	0	0	0	6	0	0	0	0	0	0	GO:0016607=>nuclear speck=>zn821_bovin ame: full=zinc finger protein 821 GO:0043484=>regulation of RNA splicing=>zn821_bovin ame: full=zinc finger protein 821 GO:0051018=>protein kinase A binding=>zn821_bovin ame: full=zinc finger protein 821) GO:0000166=>nucleotide binding=>pif1_danre ame: full=atp-dependent dna helicase pif1 GO:0003677=>DNA binding=>pif1_danre ame: full=atp-dependent dna helica…	IPR010285 (DNA helicase PIF1, ATP-dependent)
66	102	0	0	0	0	102	0	0	0	0	0	0
67	101	0	0	0	0	0	0	0	0	101	0	0
68	99	1	0	0	0	2	36	0	0	22	0	38	GO:0016787=>hydrolase activity=>polx_tobac ame: full=retrovirus-related pol polyprotein from transposon tnt 1-94 includes: ame: full=protease includes: ame: full=reverse transcriptase includes: ame: full=endonuclease)	IPR001878 (Zinc finger, CCHC-type IPR012337 (Ribonuclease H-like
69	97	94	0	0	0	0	0	0	0	3	0	0	GO:0004497=>monooxygenase activity=>cp4v2_rat ame: full=cytochrome p450 4v2 GO:0006631=>fatty acid metabolic process=>cp4v2_rat ame: full=cytochrome p450 4v2 GO:0006721=>terpenoid metabolic process=>cp4v2_rat ame: full=cytochrome p450 4v2 GO:0006725=>cellular aromatic compound metabolic process=>cp4v2_rat ame: full=cytochrome p450 4v2 GO:0008202=>steroid metabolic process=>cp4v2_rat ame: full=cyt…	IPR001128 (Cytochrome P450)
70	95	94	0	0	0	0	0	1	0	0	0	0	GO:0006952=>defense response=>sdf2_arath ame: full=stromal cell-derived factor 2-like protein short=sdf2-like protein flags: precursor GO:0051707=>response to other organism=>sdf2_arath ame: full=stromal cell-derived factor 2-like protein short=sdf2-like protein flags: precursor) GO:0016020=>membrane=>sdf2_dicdi ame: full=stromal cell-derived factor 2-like protein short=sdf2-like protein flags: p…	IPR016093 (MIR motif) IPR003608 (MIR) IPR001607 (Zinc finger, UBP-type IPR013083 (Zinc finger, RING/FYVE/PHD-type)
71	94	0	0	0	0	0	0	94	0	0	0	0
72	93	93	0	0	0	0	0	0	0	0	0	0
73	93	0	0	0	0	0	0	0	0	0	0	93
74	92	0	0	0	0	0	0	90	2	0	0	0
75	91	91	0	0	0	0	0	0	0	0	0	0
76	91	89	0	0	0	2	0	0	0	0	0	0
77	90	17	7	3	3	4	1	9	5	2	3	36	GO:0000742=>karyogamy involved in conjugation with cellular fusion=>grp78_neucr ame: full=78 kda glucose-regulated protein homolog short=grp-78 ame: full=immunoglobulin heavy chain-binding protein homolog short= flags: precursor GO:0002576=>platelet degranulation=>grp78_neucr ame: full=78 kda glucose-regulated protein homolog short=grp-78 ame: full=immunoglobulin heavy chain-binding protein homol…	IPR001023 (Heat shock protein Hsp70)	ATPase involved in protein folding and nuclear localization signal (NLS)-directed nuclear transport; member of heat shock protein 70 (HSP70) family; forms a chaperone complex with Ydj1p; localized to the nucleus, cytoplasm, and cell wall; 98% identical with Ssa2p, but subtle differences between the two proteins provide functional specificity with respect to propagation of yeast [URE3] prions and …
78	90	90	0	0	0	0	0	0	0	0	0	0		IPR004242 (Transposon, En/Spm-like)
79	90	0	0	1	0	64	0	2	0	0	5	18
80	89	1	0	0	0	76	0	0	0	1	0	11	GO:0005654=>nucleoplasm=>yy46_anasp ame: full=uncharacterized wd repeat-containing protein alr3466 GO:0005856=>cytoskeleton=>yy46_anasp ame: full=uncharacterized wd repeat-containing protein alr3466 GO:0006366=>transcription from RNA polymerase II promoter=>yy46_anasp ame: full=uncharacterized wd repeat-containing protein alr3466 GO:0016570=>histone modification=>yy46_anasp ame: full=uncharacteri…	IPR001646 (Pentapeptide repeat IPR011659 (WD40-like Beta Propeller
81	89	0	0	0	0	0	0	89	0	0	0	0
82	88	1	0	0	0	0	0	0	0	0	0	87	GO:0001937=>negative regulation of endothelial cell proliferation=>ptn1_chick ame: full=tyrosine-protein phosphatase non-receptor type 1 ame: full=cptp1 ame: full=protein-tyrosine phosphatase 1b short=ptp-1b GO:0001959=>regulation of cytokine-mediated signaling pathway=>ptn1_chick ame: full=tyrosine-protein phosphatase non-receptor type 1 ame: full=cptp1 ame: full=protein-tyrosine phosphatase 1b …	IPR000242 (Protein-tyrosine phosphatase, receptor/non-receptor type)
83	85	13	0	0	0	8	0	21	43	0	0	0
84	84	9	8	4	5	5	4	8	9	1	5	26	GO:0005215=>transporter activity=>ab14g_arath ame: full=abc transporter g family member 14 short=abc transporter short= 14 ame: full=white-brown complex homolog protein 14 short= 14 GO:0005488=>binding=>ab14g_arath ame: full=abc transporter g family member 14 short=abc transporter short= 14 ame: full=white-brown complex homolog protein 14 short= 14 GO:0005886=>plasma membrane=>ab14g_arath ame: fu…	IPR013525 (ABC-2 type transporter) IPR003593 (ATPase, AAA+ type, core IPR013525 (ABC-2 type transporter) IPR003439 (ABC transporter-like)	Plasma membrane sterol transporter of the ATP-binding cassette family; required, along with Pdr11p, for uptake of exogenous sterols and their incorporation into the plasma membrane; activity is stimulated by phosphatidylserine; sterol uptake is required for anaerobic growth because sterol biosynthesis requires oxygen Putative transporter of the ATP-binding cassette (ABC) family, implicated in ple…
85	84	1	1	1	1	1	1	1	1	1	1	74	GO:0003723=>RNA binding=>krr1_schpo ame: full=krr1 small subunit processome component homolog ame: full=krr-r motif-containing protein 1 ame: full=ribosomal rna assembly protein mis3 GO:0005654=>nucleoplasm=>krr1_schpo ame: full=krr1 small subunit processome component homolog ame: full=krr-r motif-containing protein 1 ame: full=ribosomal rna assembly protein mis3 GO:0005730=>nucleolus=>krr1_schpo…	IPR004087 (K Homology)	Essential nucleolar protein required for the synthesis of 18S rRNA and for the assembly of 40S ribosomal subunit
86	84	0	0	0	0	84	0	0	0	0	0	0
87	83	83	0	0	0	0	0	0	0	0	0	0		IPR012287 (Homeodomain-related) IPR001847 (Peptidase S21, herpesvirus maturational proteinase, assemblin)
88	83	6	0	0	0	2	0	23	5	2	0	45	GO:0001818=>negative regulation of cytokine production=>nlrc3_mouse ame: full=protein nlrc3 GO:0001819=>positive regulation of cytokine production=>nlrc3_mouse ame: full=protein nlrc3 GO:0002440=>production of molecular mediator of immune response=>nlrc3_mouse ame: full=protein nlrc3 GO:0002449=>lymphocyte mediated immunity=>nlrc3_mouse ame: full=protein nlrc3 GO:0002460=>adaptive immune response…	IPR003590 (Leucine-rich repeat, ribonuclease inhibitor subtype IPR008974 (TRAF-like IPR000477 (Reverse transcriptase
89	83	0	0	0	0	0	0	0	83	0	0	0
90	82	81	0	0	0	1	0	0	0	0	0	0		IPR007409 (Restriction endonuclease, type I, EcoRI, R subunit/Type III, Res subunit, N-terminal) IPR019955 (Ubiquitin supergroup)
91	81	33	1	0	1	2	0	0	40	0	0	4	GO:0005634=>nucleus=>tigd1_human ame: full=tigger transposable element-derived protein 1) GO:0003676=>nucleic acid binding=>tigd6_human ame: full=tigger transposable element-derived protein 6) GO:0003677=>DNA binding=>tigd6_human ame: full=tigger transposable element-derived protein 6 GO:0043229=>intracellular organelle=>tigd6_human ame: full=tigger transposable element-derived protein 6) GO:0005…	IPR004875 (DDE superfamily endonuclease, CENP-B-like) IPR009057 (Homeodomain-like) IPR006695 (Centromere protein Cenp-B, DNA-binding domain 1 IPR009057 (Homeodomain-like) IPR006600 (Pogo transposase / Cenp-B / PDC2, DNA-binding HTH domain	Transcription factor required for the synthesis of the glycolytic enzyme pyruvate decarboxylase, required for high level expression of both the THI and the PDC genes
92	81	0	0	0	0	0	0	71	10	0	0	0
93	80	0	0	0	0	0	0	0	0	0	0	80
94	79	79	0	0	0	0	0	0	0	0	0	0	GO:0004674=>protein serine/threonine kinase activity=>roco6_dicdi ame: full=probable serine threonine-protein kinase roco6 ame: full=ras of complex proteins and c-terminal of roc 6 GO:0004713=>protein tyrosine kinase activity=>roco6_dicdi ame: full=probable serine threonine-protein kinase roco6 ame: full=ras of complex proteins and c-terminal of roc 6 GO:0005515=>protein binding=>roco6_dicdi ame:…
95	79	0	0	0	0	0	0	0	0	0	0	79
96	78	67	0	0	0	11	0	0	0	0	0	0
97	78	0	0	0	0	0	0	0	78	0	0	0
98	77	2	0	0	0	2	0	1	0	0	0	72	GO:0002009=>morphogenesis of an epithelium=>pcsk5_bracl ame: full=proprotein convertase subtilisin kexin type 5 ame: full=proprotein convertase pc6-like short=apc6 flags: precursor GO:0005488=>binding=>pcsk5_bracl ame: full=proprotein convertase subtilisin kexin type 5 ame: full=proprotein convertase pc6-like short=apc6 flags: precursor GO:0005604=>basement membrane=>pcsk5_bracl ame: full=proprot…	IPR000772 (Ricin B lectin IPR001368 (TNFR/CD27/30/40/95 cysteine-rich region
99	77	0	0	0	0	0	0	0	77	0	0	0
100	76	0	0	0	0	76	0	0	0	0	0	0
101	74	74	0	0	0	0	0	0	0	0	0	0	GO:0001817=>regulation of cytokine production=>kinx_dicdi ame: full=probable serine threonine-protein kinase kinx GO:0002275=>myeloid cell activation involved in immune response=>kinx_dicdi ame: full=probable serine threonine-protein kinase kinx GO:0004713=>protein tyrosine kinase activity=>kinx_dicdi ame: full=probable serine threonine-protein kinase kinx GO:0005886=>plasma membrane=>kinx_dicdi …
102	73	4	4	4	4	6	4	4	2	5	4	32	GO:0000398=>mRNA splicing, via spliceosome=>dhx8_dicdi ame: full=atp-dependent rna helicase dhx8 ame: full=deah box protein 8 GO:0002009=>morphogenesis of an epithelium=>dhx8_dicdi ame: full=atp-dependent rna helicase dhx8 ame: full=deah box protein 8 GO:0002119=>nematode larval development=>dhx8_dicdi ame: full=atp-dependent rna helicase dhx8 ame: full=deah box protein 8 GO:0003723=>RNA binding=…	IPR001650 (Helicase, C-terminal IPR007502 (Helicase-associated domain	DEAH-box RNA-dependent ATPase/ATP-dependent RNA helicase, associates with lariat intermediates before the second catalytic step of splicing; mediates ATP-dependent mRNA release from the spliceosome and unwinds RNA duplexes RNA-dependent ATPase in the DEAH-box family, required for activation of the spliceosome before the first transesterification step in RNA splicing; orthologous to human protein …
103	73	0	0	0	0	0	0	0	0	0	0	73
104	73	73	0	0	0	0	0	0	0	0	0	0	GO:0000904=>cell morphogenesis involved in differentiation=>yr818_mimiv ame: full= serine threonine-protein kinase receptor r818 flags: precursor GO:0001816=>cytokine production=>yr818_mimiv ame: full= serine threonine-protein kinase receptor r818 flags: precursor GO:0002682=>regulation of immune system process=>yr818_mimiv ame: full= serine threonine-protein kinase receptor r818 flags: precursor…
105	72	15	0	0	0	1	0	56	0	0	0	0	GO:0005488=>binding=>pol3_drome ame: full=retrovirus-related pol polyprotein from transposon includes: ame: full=protease includes: ame: full=reverse transcriptase includes: ame: full=endonuclease GO:0016787=>hydrolase activity=>pol3_drome ame: full=retrovirus-related pol polyprotein from transposon includes: ame: full=protease includes: ame: full=reverse transcriptase includes: ame: full=endonuc…	IPR000477 (Reverse transcriptase) IPR001878 (Zinc finger, CCHC-type
106	72	72	0	0	0	0	0	0	0	0	0	0	GO:0000166=>nucleotide binding=>gbp2_rat ame: full=interferon-induced guanylate-binding protein 2 ame: full=gtp-binding protein 2 short=gbp-2 ame: full=guanine nucleotide-binding protein 2 ame: full=p67 flags: precursor GO:0009617=>response to bacterium=>gbp2_rat ame: full=interferon-induced guanylate-binding protein 2 ame: full=gtp-binding protein 2 short=gbp-2 ame: full=guanine nucleotide-bindi…	IPR003191 (Guanylate-binding protein, C-terminal IPR015894 (Guanylate-binding protein, N-terminal) IPR015894 (Guanylate-binding protein, N-terminal) IPR012287 (Homeodomain-related) IPR018523 (Isocitrate lyase/phosphorylmutase, conserved site) IPR015495 (Myb transcription factor) IPR009057 (Homeodomain-like) IPR017930 (HTH transcriptional regulator, Myb-type, DNA-binding)
107	72	72	0	0	0	0	0	0	0	0	0	0		IPR000910 (High mobility group, HMG1/HMG2) IPR009071 (High mobility group, superfamily)
108	72	0	0	0	0	72	0	0	0	0	0	0
109	72	0	0	0	0	72	0	0	0	0	0	0
110	71	0	0	0	0	0	0	2	69	0	0	0
111	69	8	1	5	4	8	4	4	7	1	12	15	GO:0000086=>G2/M transition of mitotic cell cycle=>mdr1a_mouse ame: full=multidrug resistance protein 1a ame: full=atp-binding cassette sub-family b member 1a ame: full=mdr1a ame: full=multidrug resistance protein 3 ame: full=p-glycoprotein 3 GO:0000139=>Golgi membrane=>mdr1a_mouse ame: full=multidrug resistance protein 1a ame: full=atp-binding cassette sub-family b member 1a ame: full=mdr1a ame:…	IPR003593 (ATPase, AAA+ type, core IPR011527 (ABC transporter, transmembrane domain, type 1)	Plasma membrane ATP-binding cassette (ABC) transporter required for the export of a-factor, catalyzes ATP hydrolysis coupled to a-factor transport; contains 12 transmembrane domains and two ATP binding domains; expressed only in MATa cells
112	68	0	0	0	0	0	0	0	0	68	0	0
113	68	68	0	0	0	0	0	0	0	0	0	0		IPR010993 (Sterile alpha motif homology) IPR013761 (Sterile alpha motif-type)
114	68	68	0	0	0	0	0	0	0	0	0	0	GO:0005515=>protein binding=>sp110_yeas8 ame: full=spindle pole body component 110 ame: full=extragenic suppressor of cmd1-1 mutant protein 1 ame: full=nuclear filament-related protein 1 ame: full=spindle pole body spacer protein spc110 GO:0016020=>membrane=>sp110_yeas8 ame: full=spindle pole body component 110 ame: full=extragenic suppressor of cmd1-1 mutant protein 1 ame: full=nuclear filament-…	IPR014751 (DNA double-strand break repair and VJ recombination XRCC4, C-terminal)
115	68	0	0	0	0	68	0	0	0	0	0	0
116	68	1	1	1	1	1	0	4	3	2	1	53	GO:0000139=>Golgi membrane=>pck2_schpo ame: full=protein kinase c-like 2 GO:0002281=>macrophage activation involved in immune response=>pck2_schpo ame: full=protein kinase c-like 2 GO:0003682=>chromatin binding=>pck2_schpo ame: full=protein kinase c-like 2 GO:0003785=>actin monomer binding=>pck2_schpo ame: full=protein kinase c-like 2 GO:0004699=>calcium-independent protein kinase C activity=>pck…	IPR000861 (HR1 repeat, rho-binding IPR000961 (AGC-kinase, C-terminal	Protein serine/threonine kinase essential for cell wall remodeling during growth; localized to sites of polarized growth and the mother-daughter bud neck; homolog of the alpha, beta, and gamma isoforms of mammalian protein kinase C (PKC)
117	68	0	0	0	0	0	0	2	1	0	0	65
118	68	68	0	0	0	0	0	0	0	0	0	0		IPR015880 (Zinc finger, C2H2-like) IPR007087 (Zinc finger, C2H2-type)
119	67	37	0	0	0	16	0	0	0	14	0	0		IPR012337 (Ribonuclease H-like) IPR003656 (Zinc finger, BED-type predicted) IPR012337 (Ribonuclease H-like) IPR000253 (Forkhead-associated (FHA) domain IPR008906 (HAT dimerisation
120	67	64	0	0	0	3	0	0	0	0	0	0		IPR007021 (Domain of unknown function DUF659) IPR008906 (HAT dimerisation IPR012337 (Ribonuclease H-like) IPR012337 (Ribonuclease H-like)
121	66	66	0	0	0	0	0	0	0	0	0	0	GO:0001501=>skeletal system development=>drkd_dicdi ame: full=probable serine threonine-protein kinase drkd ame: full=receptor-like kinase d GO:0001503=>ossification=>drkd_dicdi ame: full=probable serine threonine-protein kinase drkd ame: full=receptor-like kinase d GO:0002684=>positive regulation of immune system process=>drkd_dicdi ame: full=probable serine threonine-protein kinase drkd ame: fu…	IPR020864 (Membrane attack complex component/perforin (MACPF) domain) IPR011009 (Protein kinase-like domain)
122	64	1	0	1	1	1	1	0	0	9	2	48	GO:0006810=>transport=>yhch_bacsu ame: full=uncharacterized abc transporter atp-binding protein GO:0016787=>hydrolase activity=>yhch_bacsu ame: full=uncharacterized abc transporter atp-binding protein)	IPR003593 (ATPase, AAA+ type, core)
123	64	64	0	0	0	0	0	0	0	0	0	0	GO:0000228=>nuclear chromosome=>bdf1_yeast ame: full=bromodomain-containing factor 1 GO:0003682=>chromatin binding=>bdf1_yeast ame: full=bromodomain-containing factor 1 GO:0006357=>regulation of transcription from RNA polymerase II promoter=>bdf1_yeast ame: full=bromodomain-containing factor 1 GO:0016740=>transferase activity=>bdf1_yeast ame: full=bromodomain-containing factor 1 GO:0043966=>histo…	IPR001487 (Bromodomain) IPR010993 (Sterile alpha motif homology)
124	64	2	0	0	0	0	0	61	1	0	0	0	GO:0006259=>DNA metabolic process=>tcb1_caebr ame: full=transposable element tcb1 transposase ame: full=transposable element barney transposase)	IPR009057 (Homeodomain-like)
125	64	64	0	0	0	0	0	0	0	0	0	0
126	64	12	0	0	0	13	0	0	39	0	0	0	GO:0044424=>intracellular part=>harb1_danre ame: full= nuclease harbi1 ame: full=harbinger transposase-derived nuclease)	IPR006912 (Putative harbinger transposase-derived nuclease)
127	64	2	0	0	0	62	0	0	0	0	0	0
128	64	0	0	0	0	0	0	0	64	0	0	0
129	64	0	0	0	0	0	0	1	63	0	0	0
130	64	0	0	0	0	0	0	64	0	0	0	0
131	63	63	0	0	0	0	0	0	0	0	0	0		IPR012337 (Ribonuclease H-like) IPR002156 (Ribonuclease H domain)
132	63	62	0	0	0	0	0	0	1	0	0	0	GO:0044424=>intracellular part=>tra1_maize ame: full= ac transposase ame: full=orfa)	IPR012337 (Ribonuclease H-like) IPR003656 (Zinc finger, BED-type predicted IPR012337 (Ribonuclease H-like) IPR008906 (HAT dimerisation)
133	63	18	0	20	13	2	0	6	1	0	3	0		IPR013216 (Methyltransferase type 11) IPR004033 (UbiE/COQ5 methyltransferase)
134	63	0	0	0	0	63	0	0	0	0	0	0
135	63	0	0	0	0	0	0	0	0	0	0	63
136	63	0	0	0	0	0	0	0	63	0	0	0
137	63	0	0	0	0	0	0	0	63	0	0	0
138	62	0	0	0	0	62	0	0	0	0	0	0
139	62	0	0	0	0	0	0	0	62	0	0	0
140	61	3	0	2	3	27	1	10	12	0	3	0	GO:0004497=>monooxygenase activity=>cp17a_chick ame: full=steroid 17-alpha-hydroxylase lyase ame: full=cypxvii ame: full=cytochrome p450 17a1 ame: full=cytochrome p450-c17 short=cytochrome p450c17 GO:0008152=>metabolic process=>cp17a_chick ame: full=steroid 17-alpha-hydroxylase lyase ame: full=cypxvii ame: full=cytochrome p450 17a1 ame: full=cytochrome p450-c17 short=cytochrome p450c17 GO:0016705…	IPR001128 (Cytochrome P450)
141	60	60	0	0	0	0	0	0	0	0	0	0		IPR021109 (Peptidase aspartic) IPR001878 (Zinc finger, CCHC-type IPR021109 (Peptidase aspartic) IPR013242 (Retroviral aspartyl protease)
142	60	60	0	0	0	0	0	0	0	0	0	0		IPR004177 (DDHD) IPR012337 (Ribonuclease H-like) IPR018574 (Structure-specific endonuclease, subunit SLX4)
143	60	0	0	0	0	0	0	1	59	0	0	0
144	58	2	1	5	1	9	2	3	1	3	6	25	GO:0002119=>nematode larval development=>tim14_drome ame: full=mitochondrial import inner membrane translocase subunit tim14 GO:0005743=>mitochondrial inner membrane=>tim14_drome ame: full=mitochondrial import inner membrane translocase subunit tim14 GO:0006457=>protein folding=>tim14_drome ame: full=mitochondrial import inner membrane translocase subunit tim14 GO:0006626=>protein targeting to mi…	IPR001623 (Heat shock protein DnaJ, N-terminal)	Constituent of the import motor (PAM complex) component of the Translocase of the Inner Mitochondrial membrane (TIM23 complex); essential J-protein cochaperone that stimulates Ssc1p ATPase activity to drive import; inhibited by Pam16p
145	58	0	0	0	0	57	1	0	0	0	0	0
146	57	0	0	0	0	0	0	0	0	0	0	57
147	56	0	0	0	0	0	0	56	0	0	0	0
148	55	5	3	2	2	4	3	9	7	5	2	13	GO:0005515=>protein binding=>atcx_schpo ame: full= phospholipid-transporting atpase GO:0005783=>endoplasmic reticulum=>atcx_schpo ame: full= phospholipid-transporting atpase GO:0006139=>nucleobase-containing compound metabolic process=>atcx_schpo ame: full= phospholipid-transporting atpase GO:0006811=>ion transport=>atcx_schpo ame: full= phospholipid-transporting atpase GO:0009941=>chloroplast en…	IPR001757 (ATPase, P-type, K/Mg/Cd/Cu/Zn/Na/Ca/Na/H-transporter IPR023214 (HAD-like domain	Aminophospholipid translocase (flippase) that maintains membrane lipid asymmetry in post-Golgi secretory vesicles; contributes to clathrin-coated vesicle formation and endocytosis; mutations in human homolog ATP8B1 result in liver disease Aminophospholipid translocase (flippase) that localizes primarily to the plasma membrane; contributes to endocytosis, protein transport and cell polarity; type …
149	55	55	0	0	0	0	0	0	0	0	0	0	GO:0000226=>microtubule cytoskeleton organization=>lrrx1_dicdi ame: full= leucine-rich repeat-containing protein ddb_g0290503 GO:0005694=>chromosome=>lrrx1_dicdi ame: full= leucine-rich repeat-containing protein ddb_g0290503 GO:0005874=>microtubule=>lrrx1_dicdi ame: full= leucine-rich repeat-containing protein ddb_g0290503 GO:0006259=>DNA metabolic process=>lrrx1_dicdi ame: full= leucine-rich rep…	IPR011009 (Protein kinase-like domain) IPR010978 (tRNA-binding arm)
150	55	0	0	0	0	0	1	0	37	0	0	17
151	55	0	0	0	0	0	0	55	0	0	0	0
152	54	4	2	2	4	2	1	3	2	2	2	30	GO:0000398=>mRNA splicing, via spliceosome=>rpb2_schpo ame: full=dna-directed rna polymerase ii subunit rpb2 short=rna polymerase ii subunit 2 short=rna polymerase ii subunit b2 ame: full=dna-directed rna polymerase ii 138 kda polypeptide GO:0004672=>protein kinase activity=>rpb2_schpo ame: full=dna-directed rna polymerase ii subunit rpb2 short=rna polymerase ii subunit 2 short=rna polymerase ii …	IPR007644 (RNA polymerase, beta subunit, protrusion IPR015712 (DNA-directed RNA polymerase, subunit 2) IPR015712 (DNA-directed RNA polymerase, subunit 2)	RNA polymerase II second largest subunit B150, part of central core; similar to bacterial beta subunit Second-largest subunit of RNA polymerase III, which is responsible for the transcription of tRNA and 5S RNA genes, and other low molecular weight RNAs
153	54	0	0	0	0	54	0	0	0	0	0	0
154	54	2	3	2	2	2	2	9	7	3	2	20	GO:0000187=>activation of MAPK activity=>cla4_yeast ame: full=serine threonine-protein kinase cla4 GO:0001666=>response to hypoxia=>cla4_yeast ame: full=serine threonine-protein kinase cla4 GO:0001726=>ruffle=>cla4_yeast ame: full=serine threonine-protein kinase cla4 GO:0003682=>chromatin binding=>cla4_yeast ame: full=serine threonine-protein kinase cla4 GO:0004697=>protein kinase C activity=>cla…	IPR000095 (PAK-box/P21-Rho-binding IPR011009 (Protein kinase-like domain	Cdc42p-activated signal transducing kinase of the PAK (p21-activated kinase) family; involved in pheromone response, pseudohyphal/invasive growth, vacuole inheritance, down-regulation of sterol uptake; GBB motif binds Ste4p Cdc42p-activated signal transducing kinase of the PAK (p21-activated kinase) family, along with Ste20p and Skm1p; involved in septin ring assembly, vacuole inheritance, cytoki…
155	53	11	0	1	2	11	1	5	8	9	1	4	GO:0009056=>catabolic process=>lip_rhimi ame: full=lipase ame: full=triacylglycerol lipase flags: precursor GO:0043170=>macromolecule metabolic process=>lip_rhimi ame: full=lipase ame: full=triacylglycerol lipase flags: precursor GO:0044238=>primary metabolic process=>lip_rhimi ame: full=lipase ame: full=triacylglycerol lipase flags: precursor GO:0052689=>carboxylic ester hydrolase activity=>lip_…	IPR002921 (Lipase, class 3) IPR008160 (Collagen triple helix repeat)
156	53	19	0	0	0	3	0	31	0	0	0	0	GO:0008152=>metabolic process=>pol4_drome ame: full=retrovirus-related pol polyprotein from transposon 412 includes: ame: full=protease includes: ame: full=reverse transcriptase includes: ame: full=endonuclease GO:0016787=>hydrolase activity=>pol4_drome ame: full=retrovirus-related pol polyprotein from transposon 412 includes: ame: full=protease includes: ame: full=reverse transcriptase includes:…	IPR012337 (Ribonuclease H-like) IPR015416 (Zinc finger, H2C2-type, histone UAS binding)
157	52	4	2	1	1	5	2	6	5	1	1	24	GO:0000786=>nucleosome=>h31_ustma ame: full=histone GO:0003677=>DNA binding=>h31_ustma ame: full=histone GO:0005576=>extracellular region=>h31_ustma ame: full=histone GO:0005654=>nucleoplasm=>h31_ustma ame: full=histone GO:0006281=>DNA repair=>h31_ustma ame: full=histone GO:0006334=>nucleosome assembly=>h31_ustma ame: full=histone GO:0007596=>blood coagulation=>h31_ustma ame: full=histone) GO:000…	IPR000164 (Histone H3 IPR009072 (Histone-fold)	Histone H3, core histone protein required for chromatin assembly, part of heterochromatin-mediated telomeric and HM silencing; one of two identical histone H3 proteins (see HHT2); regulated by acetylation, methylation, and phosphorylation Histone H3, core histone protein required for chromatin assembly, part of heterochromatin-mediated telomeric and HM silencing; one of two identical histone H3 p…
158	52	0	0	0	0	52	0	0	0	0	0	0
159	52	1	0	1	1	1	1	1	1	1	1	43	GO:0001725=>stress fiber=>ain1_schpo ame: full=alpha-actinin-like protein 1 GO:0001882=>nucleoside binding=>ain1_schpo ame: full=alpha-actinin-like protein 1 GO:0005178=>integrin binding=>ain1_schpo ame: full=alpha-actinin-like protein 1 GO:0005523=>tropomyosin binding=>ain1_schpo ame: full=alpha-actinin-like protein 1 GO:0005634=>nucleus=>ain1_schpo ame: full=alpha-actinin-like protein 1 GO:0005…	IPR001715 (Calponin homology domain IPR011992 (EF-hand-like domain)
160	52	1	2	2	2	2	2	3	3	3	2	30	GO:0006810=>transport=>yb70_yeast ame: full=uncharacterized membrane protein ybr220c GO:0043231=>intracellular membrane-bounded organelle=>yb70_yeast ame: full=uncharacterized membrane protein ybr220c GO:0044425=>membrane part=>yb70_yeast ame: full=uncharacterized membrane protein ybr220c GO:0044444=>cytoplasmic part=>yb70_yeast ame: full=uncharacterized membrane protein ybr220c)	IPR016196 (Major facilitator superfamily, general substrate transporter)	Endosomal protein that forms a complex with Hse1p; required for recycling Golgi proteins, forming lumenal membranes and sorting ubiquitinated proteins destined for degradation; has Ubiquitin Interaction Motifs which bind ubiquitin (Ubi4p) Putative protein of unknown function; YBR220C is not an essential gene
161	51	48	0	0	0	0	0	0	0	1	0	2	GO:0003824=>catalytic activity=>rn213_human ame: full=e3 ubiquitin-protein ligase rnf213 ame: full=alk lymphoma oligomerization partner on chromosome 17 ame: full=mysterin ame: full=ring finger protein 213 GO:0044237=>cellular metabolic process=>rn213_human ame: full=e3 ubiquitin-protein ligase rnf213 ame: full=alk lymphoma oligomerization partner on chromosome 17 ame: full=mysterin ame: full=rin…	IPR003593 (ATPase, AAA+ type, core) IPR013783 (Immunoglobulin-like fold) IPR020685 (Tyrosine-protein kinase) IPR013783 (Immunoglobulin-like fold IPR011704 (ATPase, AAA-5)
162	51	5	0	0	0	3	0	11	32	0	0	0		IPR010285 (DNA helicase PIF1, ATP-dependent)
163	51	0	0	0	0	51	0	0	0	0	0	0
164	50	29	0	1	1	5	2	5	1	0	2	4	GO:0005488=>binding=>cp3at_pig ame: full=cytochrome p450 3a29 ame: full=cypiiia29 GO:0005737=>cytoplasm=>cp3at_pig ame: full=cytochrome p450 3a29 ame: full=cypiiia29 GO:0006690=>icosanoid metabolic process=>cp3at_pig ame: full=cytochrome p450 3a29 ame: full=cypiiia29 GO:0008202=>steroid metabolic process=>cp3at_pig ame: full=cytochrome p450 3a29 ame: full=cypiiia29 GO:0016709=>oxidoreductase acti…	IPR001128 (Cytochrome P450)
165	50	0	1	4	3	9	1	2	3	2	5	20			Vacuolar membrane protein of unknown function; member of the multidrug resistance family; YCR023C is not an essential gene
166	50	0	0	0	0	0	0	0	0	50	0	0
167	49	27	0	2	1	7	0	2	4	0	6	0	GO:0005488=>binding=>cp4p3_drome ame: full=probable cytochrome p450 4p3 ame: full=cypivp3 GO:0005783=>endoplasmic reticulum=>cp4p3_drome ame: full=probable cytochrome p450 4p3 ame: full=cypivp3 GO:0006694=>steroid biosynthetic process=>cp4p3_drome ame: full=probable cytochrome p450 4p3 ame: full=cypivp3 GO:0008206=>bile acid metabolic process=>cp4p3_drome ame: full=probable cytochrome p450 4p3 am…	IPR001128 (Cytochrome P450)
168	49	0	0	0	0	5	0	0	0	0	0	44
169	49	1	1	1	1	1	1	1	1	1	1	39	GO:0000060=>protein import into nucleus, translocation=>rang_schpo ame: full=ran-specific gtpase-activating protein 1 ame: full=ran-binding protein 1 short=ranbp1 ame: full=spi1-binding protein GO:0000236=>mitotic prometaphase=>rang_schpo ame: full=ran-specific gtpase-activating protein 1 ame: full=ran-binding protein 1 short=ranbp1 ame: full=spi1-binding protein GO:0005092=>GDP-dissociation inhi…	IPR011993 (Pleckstrin homology-type)	Ran GTPase binding protein; involved in nuclear protein import and RNA export, ubiquitin-mediated protein degradation during the cell cycle; shuttles between the nucleus and cytoplasm; is essential; homolog of human RanBP1
170	49	1	2	3	3	1	1	1	1	0	3	33			Mucin family member involved in the Cdc42p- and MAP kinase-dependent filamentous growth signaling pathway; also functions as an osmosensor in parallel to the Sho1p-mediated pathway; potential Cdc28p substrate Anchorage subunit of a-agglutinin of a-cells, highly O-glycosylated protein with N-terminal secretion signal and C-terminal signal for addition of GPI anchor to cell wall, linked to adhesion…
171	49	0	0	0	0	0	0	0	0	0	0	49
172	49	0	0	0	0	0	0	26	23	0	0	0
173	49	0	0	0	0	0	0	0	49	0	0	0
174	49	0	0	0	0	49	0	0	0	0	0	0
175	48	48	0	0	0	0	0	0	0	0	0	0		IPR007087 (Zinc finger, C2H2-type) IPR013087 (Zinc finger, C2H2-type/integrase, DNA-binding) IPR015880 (Zinc finger, C2H2-like) IPR022755 (Zinc finger, double-stranded RNA binding)
176	48	0	0	0	0	48	0	0	0	0	0	0
177	48	0	0	0	0	2	0	41	5	0	0	0
178	47	1	2	1	1	3	1	4	4	2	1	27	GO:0000786=>nucleosome=>h2a1_debha ame: full=histone GO:0003677=>DNA binding=>h2a1_debha ame: full=histone GO:0005634=>nucleus=>h2a1_debha ame: full=histone GO:0006281=>DNA repair=>h2a1_debha ame: full=histone GO:0006334=>nucleosome assembly=>h2a1_debha ame: full=histone)	IPR009072 (Histone-fold)	Histone H2A, core histone protein required for chromatin assembly and chromosome function; one of two nearly identical (see also HTA1) subtypes; DNA damage-dependent phosphorylation by Mec1p facilitates DNA repair; acetylated by Nat4p Histone H2A, core histone protein required for chromatin assembly and chromosome function; one of two nearly identical subtypes (see also HTA2); DNA damage-dependen…
179	47	33	0	2	2	2	0	5	0	0	3	0	GO:0008152=>metabolic process=>6hn3m_psefl ame: full=6-hydroxynicotinate 3-monooxygenase flags: precursor)	IPR002938 (Monooxygenase, FAD-binding) IPR003042 (Aromatic-ring hydroxylase-like) IPR016040 (NAD(P)-binding domain) IPR016040 (NAD(P)-binding domain)
180	47	0	0	0	0	47	0	0	0	0	0	0
181	47	2	3	3	3	3	2	2	3	3	3	20	GO:0000151=>ubiquitin ligase complex=>mms2_schpo ame: full=ubiquitin-conjugating enzyme spm2 ame: full=ubiquitin-conjugating enzyme variant mms2 homolog short=uev mms2 GO:0000729=>DNA double-strand break processing=>mms2_schpo ame: full=ubiquitin-conjugating enzyme spm2 ame: full=ubiquitin-conjugating enzyme variant mms2 homolog short=uev mms2 GO:0002755=>MyD88-dependent toll-like receptor signal…	IPR016135 (Ubiquitin-conjugating enzyme/RWD-like) IPR010989 (t-SNARE)	Ubiquitin-conjugating enzyme variant involved in error-free postreplication repair; forms a heteromeric complex with Ubc13p, an active ubiquitin-conjugating enzyme; cooperates with chromatin-associated RING finger proteins, Rad18p and Rad5p Plasma membrane t-SNARE involved in fusion of secretory vesicles at the plasma membrane; syntaxin homolog that is functionally redundant with Sso1p Plasma mem…
182	47	0	0	0	0	0	0	0	0	47	0	0
183	46	2	1	2	2	1	1	1	2	2	2	30	GO:0003676=>nucleic acid binding=>rpc10_human ame: full=dna-directed rna polymerase iii subunit rpc10 short=rna polymerase iii subunit c10 ame: full=dna-directed rna polymerase iii subunit k ame: full=rna polymerase iii kda subunit short= ame: full=rna polymerase iii subunit c11 short= 11p short=rpc11 short=hrpc11 GO:0005666=>DNA-directed RNA polymerase III complex=>rpc10_human ame: full=dna-dire…	IPR001222 (Zinc finger, TFIIS-type IPR001529 (DNA-directed RNA polymerase, M/15kDa subunit) IPR004039 (Rubredoxin-type Fe(Cys)4 protein	RNA polymerase III subunit C11; mediates pol III RNA cleavage activity and is important for termination of transcription; homologous to TFIIS
184	46	0	0	0	0	1	0	41	4	0	0	0
185	45	15	2	4	3	5	1	3	3	1	4	4	GO:0005886=>plasma membrane=>bat1_rat ame: full=b( +)-type amino acid transporter 1 short=b( +)at ame: full=glycoprotein-associated amino acid transporter +at1 ame: full=solute carrier family 7 member 9 GO:0006865=>amino acid transport=>bat1_rat ame: full=b( +)-type amino acid transporter 1 short=b( +)at ame: full=glycoprotein-associated amino acid transporter +at1 ame: full=solute carrier family…	IPR002293 (Amino acid/polyamine transporter I) IPR004841 (Amino acid permease domain)	High affinity methionine permease, integral membrane protein with 13 putative membrane-spanning regions; also involved in cysteine uptake Low affinity methionine permease, similar to Mup1p
186	45	2	2	2	2	4	2	7	5	2	2	15	GO:0070011=>peptidase activity, acting on L-amino acid peptides=>ampp1_lacbs ame: full=probable xaa-pro aminopeptidase p short=ampp short=aminopeptidase p ame: full=aminoacylproline aminopeptidase ame: full=prolidase) GO:0003824=>catalytic activity=>pst1_schpo ame: full=paired amphipathic helix protein pst1 ame: full=sin3 homolog 1 GO:0005515=>protein binding=>pst1_schpo ame: full=paired amphipat…	IPR000587 (Creatinase IPR000994 (Peptidase M24, structural domain) IPR003822 (Paired amphipathic helix	Protein involved in negative regulation of transcription of iron regulon; forms an iron independent complex with Fra2p, Grx3p, and Grx4p; cytosolic; mutant fails to repress transcription of iron regulon and is defective in spore formation Component of the Sin3p-Rpd3p histone deacetylase complex, involved in transcriptional repression and activation of diverse processes, including mating-type swit…
187	45	1	2	1	1	1	1	4	4	1	2	27	GO:0003987=>acetate-CoA ligase activity=>acsa_phybl ame: full=acetyl-coenzyme a synthetase ame: full=acetate-- ligase ame: full=acyl-activating enzyme GO:0004822=>isoleucine-tRNA ligase activity=>acsa_phybl ame: full=acetyl-coenzyme a synthetase ame: full=acetate-- ligase ame: full=acyl-activating enzyme GO:0005524=>ATP binding=>acsa_phybl ame: full=acetyl-coenzyme a synthetase ame: full=acetate-…	IPR011904 (Acetate-CoA ligase)	Acetyl-coA synthetase isoform which, along with Acs2p, is the nuclear source of acetyl-coA for histone acetylation; expressed during growth on nonfermentable carbon sources and under aerobic conditions Acetyl-coA synthetase isoform which, along with Acs1p, is the nuclear source of acetyl-coA for histone acetylation; mutants affect global transcription; required for growth on glucose; expressed un…
188	45	2	2	2	2	2	2	2	2	1	2	26	GO:0003008=>system process=>ylm1_schpo ame: full=tpr repeat-containing protein GO:0005515=>protein binding=>ylm1_schpo ame: full=tpr repeat-containing protein GO:0005813=>centrosome=>ylm1_schpo ame: full=tpr repeat-containing protein GO:0005929=>cilium=>ylm1_schpo ame: full=tpr repeat-containing protein GO:0007017=>microtubule-based process=>ylm1_schpo ame: full=tpr repeat-containing protein GO:0…	IPR017959 (Aspartyl/glutamyl-tRNA(Asn/Gln) amidotransferase, subunit B /E) IPR011990 (Tetratricopeptide-like helical)	Essential conserved protein with a role in maintaining cell wall integrity; contains six TPR (tetratricopeptide repeat) domains clustered in the C-terminal region; conditional mutant is suppressed by overexpression of GFA1 Subunit of the trimeric GatFAB AmidoTransferase(AdT) complex; involved in the formation of Q-tRNAQ; mutation is functionally complemented by the bacterial GatB ortholog
189	45	45	0	0	0	0	0	0	0	0	0	0
190	45	45	0	0	0	0	0	0	0	0	0	0		IPR003172 (MD-2-related lipid-recognition) IPR014756 (Immunoglobulin E-set)
191	44	11	2	2	2	13	3	1	2	3	3	2	GO:0008152=>metabolic process=>lac4_trave ame: full=laccase-4 ame: full=benzenediol:oxygen oxidoreductase 4 ame: full=diphenol oxidase 4 ame: full=urishiol oxidase 4 flags: precursor GO:0016491=>oxidoreductase activity=>lac4_trave ame: full=laccase-4 ame: full=benzenediol:oxygen oxidoreductase 4 ame: full=diphenol oxidase 4 ame: full=urishiol oxidase 4 flags: precursor GO:0046872=>metal ion bindi…	IPR008972 (Cupredoxin)	Multicopper oxidase, integral membrane protein with similarity to Fet3p; may have a role in iron transport Ferro-O2-oxidoreductase required for high-affinity iron uptake and involved in mediating resistance to copper ion toxicity, belongs to class of integral membrane multicopper oxidases
192	44	0	0	0	0	44	0	0	0	0	0	0
193	44	0	0	0	0	0	0	44	0	0	0	0
194	43	4	0	0	0	2	2	2	2	3	2	26	GO:0001504=>neurotransmitter uptake=>at1a_torca ame: full=sodium potassium-transporting atpase subunit alpha short=na(+) k(+) atpase alpha subunit ame: full=sodium pump subunit alpha flags: precursor GO:0002026=>regulation of the force of heart contraction=>at1a_torca ame: full=sodium potassium-transporting atpase subunit alpha short=na(+) k(+) atpase alpha subunit ame: full=sodium pump subunit a…	IPR001757 (ATPase, P-type, K/Mg/Cd/Cu/Zn/Na/Ca/Na/H-transporter IPR023214 (HAD-like domain
195	43	43	0	0	0	0	0	0	0	0	0	0
196	43	0	0	1	0	38	1	1	1	0	1	0
197	43	0	0	0	0	42	0	0	1	0	0	0
198	43	0	0	0	0	0	0	0	0	0	0	43
199	43	0	0	0	0	0	0	0	43	0	0	0
200	43	0	0	0	0	43	0	0	0	0	0	0
201	42	0	0	0	0	42	0	0	0	0	0	0
202	42	0	0	0	0	0	0	0	0	0	0	42
203	41	18	0	0	0	0	1	0	0	0	0	22	GO:0001523=>retinoid metabolic process=>rdh13_human ame: full=retinol dehydrogenase 13 GO:0005515=>protein binding=>rdh13_human ame: full=retinol dehydrogenase 13 GO:0005783=>endoplasmic reticulum=>rdh13_human ame: full=retinol dehydrogenase 13 GO:0005886=>plasma membrane=>rdh13_human ame: full=retinol dehydrogenase 13 GO:0006776=>vitamin A metabolic process=>rdh13_human ame: full=retinol dehydro…	IPR002198 (Short-chain dehydrogenase/reductase SDR)
204	41	41	0	0	0	0	0	0	0	0	0	0		IPR013083 (Zinc finger, RING/FYVE/PHD-type)
205	41	1	2	2	2	2	0	3	4	1	2	22	GO:0000050=>urea cycle=>carb_schpo ame: full=carbamoyl-phosphate synthase arginine-specific large chain ame: full=arginine-specific carbamoyl-phosphate ammonia chain GO:0002134=>UTP binding=>carb_schpo ame: full=carbamoyl-phosphate synthase arginine-specific large chain ame: full=arginine-specific carbamoyl-phosphate ammonia chain GO:0004070=>aspartate carbamoyltransferase activity=>carb_schpo am…	IPR005483 (Carbamoyl-phosphate synthase, large subunit, CPS-domain IPR011607 (Methylglyoxal synthase-like domain	Bifunctional carbamoylphosphate synthetase (CPSase)-aspartate transcarbamylase (ATCase), catalyzes the first two enzymatic steps in the de novo biosynthesis of pyrimidines; both activities are subject to feedback inhibition by UTP Large subunit of carbamoyl phosphate synthetase, which catalyzes a step in the synthesis of citrulline, an arginine precursor
206	41	0	0	0	0	41	0	0	0	0	0	0
207	41	0	0	0	0	41	0	0	0	0	0	0
208	41	0	0	6	1	0	0	0	0	0	22	12
209	41	0	0	1	1	1	1	0	0	0	1	36
210	41	0	0	0	0	0	0	0	0	0	0	41
211	41	1	1	1	1	1	1	4	2	1	1	27	GO:0000139=>Golgi membrane=>rhoa_emeni ame: full=gtp-binding protein rhoa ame: full=rho1 protein homolog flags: precursor GO:0000915=>cytokinesis, actomyosin contractile ring assembly=>rhoa_emeni ame: full=gtp-binding protein rhoa ame: full=rho1 protein homolog flags: precursor GO:0001666=>response to hypoxia=>rhoa_emeni ame: full=gtp-binding protein rhoa ame: full=rho1 protein homolog flags: pre…	IPR005225 (Small GTP-binding protein)	GTP-binding protein of the rho subfamily of Ras-like proteins, involved in establishment of cell polarity; regulates protein kinase C (Pkc1p) and the cell wall synthesizing enzyme 1,3-beta-glucan synthase (Fks1p and Gsc2p)
212	41	0	0	0	0	0	0	0	41	0	0	0
213	40	1	2	1	1	2	1	4	4	2	1	21	GO:0000786=>nucleosome=>h2b_mago7 ame: full=histone h2b GO:0003677=>DNA binding=>h2b_mago7 ame: full=histone h2b GO:0005811=>lipid particle=>h2b_mago7 ame: full=histone h2b GO:0006334=>nucleosome assembly=>h2b_mago7 ame: full=histone h2b GO:0035267=>NuA4 histone acetyltransferase complex=>h2b_mago7 ame: full=histone h2b)	IPR000558 (Histone H2B IPR009072 (Histone-fold)	Histone H2B, core histone protein required for chromatin assembly and chromosome function; nearly identical to HTB1; Rad6p-Bre1p-Lge1p mediated ubiquitination regulates transcriptional activation, meiotic DSB formation and H3 methylation Histone H2B, core histone protein required for chromatin assembly and chromosome function; nearly identical to HTB2; Rad6p-Bre1p-Lge1p mediated ubiquitination re…
214	40	40	0	0	0	0	0	0	0	0	0	0
215	40	2	2	2	2	2	1	5	3	1	2	18	GO:0000086=>G2/M transition of mitotic cell cycle=>tba1c_crigr ame: full=tubulin alpha-1c chain ame: full=alpha-tubulin 3 ame: full=alpha-tubulin iii ame: full=tubulin alpha-3 chain GO:0000235=>astral microtubule=>tba1c_crigr ame: full=tubulin alpha-1c chain ame: full=alpha-tubulin 3 ame: full=alpha-tubulin iii ame: full=tubulin alpha-3 chain GO:0000910=>cytokinesis=>tba1c_crigr ame: full=tubulin…	IPR000217 (Tubulin IPR023123 (Tubulin, C-terminal)	Alpha-tubulin; associates with beta-tubulin (Tub2p) to form tubulin dimer, which polymerizes to form microtubules Alpha-tubulin; associates with beta-tubulin (Tub2p) to form tubulin dimer, which polymerizes to form microtubules; expressed at lower level than Tub1p
216	40	1	3	1	1	1	1	7	4	1	1	19	GO:0000086=>G2/M transition of mitotic cell cycle=>kapa_yeast ame: full=camp-dependent protein kinase type 1 short=pka 1 ame: full=cdc25-suppressing protein kinase ame: full=pk-25 GO:0000287=>magnesium ion binding=>kapa_yeast ame: full=camp-dependent protein kinase type 1 short=pka 1 ame: full=cdc25-suppressing protein kinase ame: full=pk-25 GO:0001525=>angiogenesis=>kapa_yeast ame: full=camp-dep…	IPR000961 (AGC-kinase, C-terminal IPR011009 (Protein kinase-like domain)	cAMP-dependent protein kinase catalytic subunit; promotes vegetative growth in response to nutrients via the Ras-cAMP signaling pathway; partially redundant with Tpk1p and Tpk2p; localizes to P-bodies during stationary phase cAMP-dependent protein kinase catalytic subunit; promotes vegetative growth in response to nutrients via the Ras-cAMP signaling pathway; inhibited by regulatory subunit Bcy1p…
217	40	0	0	0	0	0	0	0	0	0	1	39
218	40	0	0	0	0	0	0	0	0	0	0	40
219	40	0	0	0	0	0	0	18	22	0	0	0
220	40	40	0	0	0	0	0	0	0	0	0	0	GO:0005488=>binding=>kbtb2_hspv ame: full=kelch repeat and btb domain-containing protein 2) GO:0009987=>cellular process=>kbtba_human ame: full=kelch repeat and btb domain-containing protein 10 ame: full=kel-like protein 23 ame: full=kelch-related protein 1 ame: full=sarcosin GO:0044424=>intracellular part=>kbtba_human ame: full=kelch repeat and btb domain-containing protein 10 ame: full=kel-like…	IPR011333 (BTB/POZ fold IPR013089 (Kelch-related) IPR009060 (UBA-like IPR000433 (Zinc finger, ZZ-type IPR013089 (Kelch-related) IPR006571 (TLDc
221	39	6	2	3	4	4	2	5	7	3	3	0	GO:0016020=>membrane=>chs1_phybl ame: full=chitin synthase 1 ame: full=chitin-udp acetyl-glucosaminyl transferase 1 ame: full=class-ii chitin synthase 1) GO:0016740=>transferase activity=>chs1_phybl ame: full=chitin synthase 1 ame: full=chitin-udp acetyl-glucosaminyl transferase 1 ame: full=class-ii chitin synthase 1 GO:0044464=>cell part=>chs1_phybl ame: full=chitin synthase 1 ame: full=chitin-u…	IPR004834 (Chitin synthase IPR013616 (Chitin synthase N-terminal)	Chitin synthase II; catalyzes transfer of N-acetylglucosamine (GlcNAc) to chitin upon activation of zymogenic form; required for chitin synthesis in the primary septum during cytokinesis; localization regulated by Cdk1p during mitosis Chitin synthase I, requires activation from zymogenic form in order to catalyze the transfer of N-acetylglucosamine (GlcNAc) to chitin; required for repairing the c…
222	39	39	0	0	0	0	0	0	0	0	0	0	GO:0003824=>catalytic activity=>lin1_nycco ame: full=line-1 reverse transcriptase homolog)	IPR005135 (Endonuclease/exonuclease/phosphatase) IPR015706 (RNA-directed DNA polymerase (reverse transcriptase))
223	39	17	5	2	2	3	1	5	1	0	3	0	GO:0016020=>membrane=>yajo_ecoli ame: full=uncharacterized oxidoreductase GO:0016491=>oxidoreductase activity=>yajo_ecoli ame: full=uncharacterized oxidoreductase GO:0044237=>cellular metabolic process=>yajo_ecoli ame: full=uncharacterized oxidoreductase GO:0044444=>cytoplasmic part=>yajo_ecoli ame: full=uncharacterized oxidoreductase) GO:0005216=>ion channel activity=>nora_aspfl ame: full=norsol…	IPR001395 (Aldo/keto reductase IPR023210 (NADP-dependent oxidoreductase domain)	Putative aryl-alcohol dehydrogenase; similar to P. chrysosporium aryl-alcohol dehydrogenase; mutational analysis has not yet revealed a physiological role Putative aryl-alcohol dehydrogenase; similar to P. chrysosporium aryl-alcohol dehydrogenase; mutational analysis has not yet revealed a physiological role Putative aryl-alcohol dehydrogenase; involved in oxidative stress response; similar to P.…
224	39	24	0	0	0	0	0	10	1	0	0	4	GO:0005515=>protein binding=>udb13_rabit ame: full=udp-glucuronosyltransferase 2b13 short=udpgt 2b13 ame: full=egt10 flags: precursor GO:0006805=>xenobiotic metabolic process=>udb13_rabit ame: full=udp-glucuronosyltransferase 2b13 short=udpgt 2b13 ame: full=egt10 flags: precursor GO:0008194=>UDP-glycosyltransferase activity=>udb13_rabit ame: full=udp-glucuronosyltransferase 2b13 short=udpgt 2b13 …	IPR002213 (UDP-glucuronosyl/UDP-glucosyltransferase)
225	39	2	1	2	1	2	1	3	3	1	1	22	GO:0005506=>iron ion binding=>ampm1_danre ame: full=methionine aminopeptidase 1 short=map 1 short= 1 ame: full=peptidase m 1 GO:0005739=>mitochondrion=>ampm1_danre ame: full=methionine aminopeptidase 1 short=map 1 short= 1 ame: full=peptidase m 1 GO:0005829=>cytosol=>ampm1_danre ame: full=methionine aminopeptidase 1 short=map 1 short= 1 ame: full=peptidase m 1 GO:0006417=>regulation of translatio…	IPR000994 (Peptidase M24, structural domain IPR002893 (Zinc finger, MYND-type)	Methionine aminopeptidase, catalyzes the cotranslational removal of N-terminal methionine from nascent polypeptides; function is partially redundant with that of Map2p
226	39	3	0	2	1	1	1	0	1	1	3	26	GO:0004957=>prostaglandin E receptor activity=>pgdh_cavpo ame: full=15-hydroxyprostaglandin dehydrogenase short=15-pgdh ame: full=prostaglandin dehydrogenase 1 GO:0005730=>nucleolus=>pgdh_cavpo ame: full=15-hydroxyprostaglandin dehydrogenase short=15-pgdh ame: full=prostaglandin dehydrogenase 1 GO:0005737=>cytoplasm=>pgdh_cavpo ame: full=15-hydroxyprostaglandin dehydrogenase short=15-pgdh ame: fu…	IPR002198 (Short-chain dehydrogenase/reductase SDR)
227	39	2	1	1	0	1	1	1	1	1	1	29	GO:0005381=>iron ion transmembrane transporter activity=>vit11_orysj ame: full=vacuolar iron transporter short= GO:0005774=>vacuolar membrane=>vit11_orysj ame: full=vacuolar iron transporter short= GO:0006880=>intracellular sequestering of iron ion=>vit11_orysj ame: full=vacuolar iron transporter short=)	IPR008217 (Domain of unknown function DUF125, transmembrane)	Putative vacuolar Fe2+/Mn2+ transporter; suppresses respiratory deficit of yfh1 mutants, which lack the ortholog of mammalian frataxin, by preventing mitochondrial iron accumulation
228	39	0	1	2	1	4	1	18	8	0	2	2			Endo-polygalacturonase, pectolytic enzyme that hydrolyzes the alpha-1,4-glycosidic bonds in the rhamnogalacturonan chains in pectins
229	39	3	2	2	2	4	1	3	4	1	2	15	GO:0000723=>telomere maintenance=>h4_stypl ame: full=histone h4 GO:0000786=>nucleosome=>h4_stypl ame: full=histone h4 GO:0003677=>DNA binding=>h4_stypl ame: full=histone h4 GO:0005515=>protein binding=>h4_stypl ame: full=histone h4 GO:0005576=>extracellular region=>h4_stypl ame: full=histone h4 GO:0005654=>nucleoplasm=>h4_stypl ame: full=histone h4 GO:0005730=>nucleolus=>h4_stypl ame: full=histon…	IPR001951 (Histone H4 IPR009072 (Histone-fold)	Histone H4, core histone protein required for chromatin assembly and chromosome function; one of two identical histone proteins (see also HHF2); contributes to telomeric silencing; N-terminal domain involved in maintaining genomic integrity Histone H4, core histone protein required for chromatin assembly and chromosome function; one of two identical histone proteins (see also HHF1); contributes t…
230	39	0	2	1	1	6	0	7	14	0	2	6			Conserved NADPH oxidoreductase containing flavin mononucleotide (FMN), homologous to Oye3p with different ligand binding and catalytic properties; may be involved in sterol metabolism, oxidative stress response, and programmed cell death Conserved NADPH oxidoreductase containing flavin mononucleotide (FMN), homologous to Oye2p with different ligand binding and catalytic properties; has potential …
231	39	1	0	0	0	0	0	0	0	0	1	37
232	39	1	2	2	1	1	1	3	2	1	1	24	GO:0003735=>structural constituent of ribosome=>rs30_schpo ame: full=40s ribosomal protein s30 GO:0005515=>protein binding=>rs30_schpo ame: full=40s ribosomal protein s30 GO:0006412=>translation=>rs30_schpo ame: full=40s ribosomal protein s30 GO:0016071=>mRNA metabolic process=>rs30_schpo ame: full=40s ribosomal protein s30 GO:0019058=>viral infectious cycle=>rs30_schpo ame: full=40s ribosomal pr…	IPR006846 (Ribosomal protein S30)	Protein component of the small (40S) ribosomal subunit; nearly identical to Rps30Bp and has similarity to rat S30 ribosomal protein Protein component of the small (40S) ribosomal subunit; nearly identical to Rps30Ap and has similarity to rat S30 ribosomal protein
233	39	0	0	2	0	0	0	2	1	1	2	31
234	39	0	0	0	0	1	1	0	0	1	0	36
235	39	0	0	0	0	0	0	0	0	0	0	39
236	39	39	0	0	0	0	0	0	0	0	0	0		IPR013762 (Integrase-like, catalytic core, phage) IPR011010 (DNA breaking-rejoining enzyme, catalytic core) IPR021893 (Protein of unknown function DUF3504)
237	38	3	1	1	1	1	1	5	5	2	1	17	GO:0000086=>G2/M transition of mitotic cell cycle=>tbb4b_human ame: full=tubulin beta-4b chain ame: full=tubulin beta-2 chain ame: full=tubulin beta-2c chain GO:0001764=>neuron migration=>tbb4b_human ame: full=tubulin beta-4b chain ame: full=tubulin beta-2 chain ame: full=tubulin beta-2c chain GO:0003924=>GTPase activity=>tbb4b_human ame: full=tubulin beta-4b chain ame: full=tubulin beta-2 chain …	IPR000217 (Tubulin IPR023123 (Tubulin, C-terminal)	Beta-tubulin; associates with alpha-tubulin (Tub1p and Tub3p) to form tubulin dimer, which polymerizes to form microtubules
238	38	3	1	2	1	3	2	4	3	1	1	17		IPR001905 (Ammonium transporter)	Ammonium permease involved in regulation of pseudohyphal growth; belongs to a ubiquitous family of cytoplasmic membrane proteins that transport only ammonium (NH4+); expression is under the nitrogen catabolite repression regulation
239	38	2	1	2	2	2	2	2	2	2	2	19	GO:0005747=>mitochondrial respiratory chain complex I=>nduac_bovin ame: full=nadh dehydrogenase 1 alpha subcomplex subunit 12 ame: full=complex i- short=ci- short= ame: full=nadh-ubiquinone oxidoreductase subunit GO:0006979=>response to oxidative stress=>nduac_bovin ame: full=nadh dehydrogenase 1 alpha subcomplex subunit 12 ame: full=complex i- short=ci- short= ame: full=nadh-ubiquinone oxidoredu…	IPR007763 (NADH:ubiquinone oxidoreductase, 17.2kDa subunit) IPR009053 (Prefoldin IPR013134 (Zinc hook, Rad50)	Subunit of MRX complex, with Mre11p and Xrs2p, involved in processing double-strand DNA breaks in vegetative cells, initiation of meiotic DSBs, telomere maintenance, and nonhomologous end joining
240	38	0	0	0	0	0	0	0	38	0	0	0
241	38	0	0	0	0	38	0	0	0	0	0	0
242	38	0	0	0	0	0	0	38	0	0	0	0
243	37	0	0	0	0	8	0	0	0	29	0	0
244	37	2	0	2	2	4	2	9	8	6	2	0	GO:0002376=>immune system process=>chs8_ustma ame: full=chitin synthase 8 ame: full=chitin-udp acetyl-glucosaminyl transferase 8 ame: full=myosin chitin synthase 1 GO:0006950=>response to stress=>chs8_ustma ame: full=chitin synthase 8 ame: full=chitin-udp acetyl-glucosaminyl transferase 8 ame: full=myosin chitin synthase 1 GO:0015629=>actin cytoskeleton=>chs8_ustma ame: full=chitin synthase 8 ame…	IPR001199 (Cytochrome b5 IPR001609 (Myosin head, motor domain
245	37	3	1	2	1	1	1	7	5	3	3	10	GO:0005516=>calmodulin binding=>atc2_schpo ame: full=calcium-transporting atpase 2 GO:0005783=>endoplasmic reticulum=>atc2_schpo ame: full=calcium-transporting atpase 2 GO:0005794=>Golgi apparatus=>atc2_schpo ame: full=calcium-transporting atpase 2 GO:0005886=>plasma membrane=>atc2_schpo ame: full=calcium-transporting atpase 2 GO:0006816=>calcium ion transport=>atc2_schpo ame: full=calcium-transp…	IPR001757 (ATPase, P-type, K/Mg/Cd/Cu/Zn/Na/Ca/Na/H-transporter IPR023214 (HAD-like domain	Vacuolar Ca2+ ATPase involved in depleting cytosol of Ca2+ ions; prevents growth inhibition by activation of calcineurin in the presence of elevated concentrations of calcium; similar to mammalian PMCA1a
246	37	0	0	0	0	37	0	0	0	0	0	0
247	37	0	0	0	0	37	0	0	0	0	0	0
248	37	1	2	1	0	1	1	5	4	1	1	20	GO:0000184=>nuclear-transcribed mRNA catabolic process, nonsense-mediated decay=>rl11_neucr ame: full=60s ribosomal protein l11 GO:0003735=>structural constituent of ribosome=>rl11_neucr ame: full=60s ribosomal protein l11 GO:0005515=>protein binding=>rl11_neucr ame: full=60s ribosomal protein l11 GO:0005730=>nucleolus=>rl11_neucr ame: full=60s ribosomal protein l11 GO:0006364=>rRNA processing=>r…	IPR002132 (Ribosomal protein L5 IPR022803 (Ribosomal protein L5 domain)	Protein component of the large (60S) ribosomal subunit, nearly identical to Rpl11Ap; involved in ribosomal assembly; depletion causes degradation of proteins and RNA of the 60S subunit; has similarity to E. coli L5 and rat L11 Protein of the large 60S ribosomal subunit, nearly identical to Rpl11Bp but expressed at twice the level; involved in ribosomal assembly; depletion causes degradation of 60…
249	37	1	1	1	1	1	1	2	3	0	1	25	GO:0002027=>regulation of heart rate=>cch1_schpo ame: full=calcium-channel protein cch1 GO:0005248=>voltage-gated sodium channel activity=>cch1_schpo ame: full=calcium-channel protein cch1 GO:0005515=>protein binding=>cch1_schpo ame: full=calcium-channel protein cch1 GO:0006816=>calcium ion transport=>cch1_schpo ame: full=calcium-channel protein cch1 GO:0007268=>synaptic transmission=>cch1_schpo …	IPR005821 (Ion transport IPR018249 (EF-HAND 2)	Voltage-gated high-affinity calcium channel involved in calcium influx in response to some environmental stresses as well as exposure to mating pheromones; interacts and co-localizes with Mid1p, suggesting Cch1p and Mid1p function together
250	37	1	2	1	1	1	0	3	2	1	1	24	GO:0005524=>ATP binding=>hsp83_iponi ame: full=heat shock protein 83 GO:0005618=>cell wall=>hsp83_iponi ame: full=heat shock protein 83 GO:0005730=>nucleolus=>hsp83_iponi ame: full=heat shock protein 83 GO:0005739=>mitochondrion=>hsp83_iponi ame: full=heat shock protein 83 GO:0005774=>vacuolar membrane=>hsp83_iponi ame: full=heat shock protein 83 GO:0005794=>Golgi apparatus=>hsp83_iponi ame: full…	IPR001404 (Heat shock protein Hsp90)	Cytoplasmic chaperone of the Hsp90 family, redundant in function and nearly identical with Hsp82p, and together they are essential; expressed constitutively at 10-fold higher basal levels than HSP82 and induced 2-3 fold by heat shock Hsp90 chaperone required for pheromone signaling and negative regulation of Hsf1p; docks with Tom70p for mitochondrial preprotein delivery; promotes telomerase DNA b…
251	37	1	1	1	1	1	1	2	1	1	1	26	GO:0000002=>mitochondrial genome maintenance=>lonm_emeni ame: full=lon protease mitochondrial flags: precursor GO:0001666=>response to hypoxia=>lonm_emeni ame: full=lon protease mitochondrial flags: precursor GO:0003697=>single-stranded DNA binding=>lonm_emeni ame: full=lon protease mitochondrial flags: precursor GO:0003727=>single-stranded RNA binding=>lonm_emeni ame: full=lon protease mitochond…	IPR004815 (Peptidase S16, ATP-dependent protease La IPR015947 (Pseudouridine synthase/archaeosine transglycosylase-like)	ATP-dependent Lon protease, involved in degradation of misfolded proteins in mitochondria; required for biogenesis and maintenance of mitochondria
252	37	3	3	3	2	2	2	9	4	3	2	4	GO:0008233=>peptidase activity=>mca1_scls1 ame: full=metacaspase-1 flags: precursor) GO:0000184=>nuclear-transcribed mRNA catabolic process, nonsense-mediated decay=>rs24_muccl ame: full=40s ribosomal protein s24 GO:0001510=>RNA methylation=>rs24_muccl ame: full=40s ribosomal protein s24 GO:0005730=>nucleolus=>rs24_muccl ame: full=40s ribosomal protein s24 GO:0005774=>vacuolar membrane=>rs24_mucc…	IPR011600 (Peptidase C14, caspase catalytic) IPR012677 (Nucleotide-binding, alpha-beta plait)	Protein component of the small (40S) ribosomal subunit; identical to Rps24Bp and has similarity to rat S24 ribosomal protein Protein component of the small (40S) ribosomal subunit; identical to Rps24Ap and has similarity to rat S24 ribosomal protein Putative cysteine protease similar to mammalian caspases; involved in regulation of apoptosis upon H2O2 treatment; contributes to clearance of insolu…
253	37	0	0	0	0	0	0	0	37	0	0	0
254	37	1	34	0	0	0	0	1	1	0	0	0			Putative protein of unknown function with similarity to helicases; located in the telomere region on the right arm of chromosome VIII Helicase-like protein encoded within the telomeric Y' element Putative protein of unknown function, potential Cdc28p substrate Helicase-like protein encoded within the telomeric Y' element; induced by treatment with 8-methoxypsoralen and UVA irradiation Helicase-li…
255	36	6	1	1	1	2	2	10	7	5	1	0	GO:0005634=>nucleus=>chs7_ustma ame: full=chitin synthase 7 ame: full=chitin-udp acetyl-glucosaminyl transferase 7 GO:0016020=>membrane=>chs7_ustma ame: full=chitin synthase 7 ame: full=chitin-udp acetyl-glucosaminyl transferase 7 GO:0016023=>cytoplasmic membrane-bounded vesicle=>chs7_ustma ame: full=chitin synthase 7 ame: full=chitin-udp acetyl-glucosaminyl transferase 7 GO:0016758=>transferase …	IPR001199 (Cytochrome b5 IPR004835 (Fungal chitin synthase	Chitin synthase III, catalyzes the transfer of N-acetylglucosamine (GlcNAc) to chitin; required for synthesis of the majority of cell wall chitin, the chitin ring during bud emergence, and spore wall chitosan
256	36	24	0	1	1	3	0	2	2	2	1	0	GO:0000340=>RNA 7-methylguanosine cap binding=>mel1_orysj ame: full=protein argonaute mel1 ame: full=protein meiosis arrested at leptotene 1 short= 1 GO:0000932=>cytoplasmic mRNA processing body=>mel1_orysj ame: full=protein argonaute mel1 ame: full=protein meiosis arrested at leptotene 1 short= 1 GO:0000956=>nuclear-transcribed mRNA catabolic process=>mel1_orysj ame: full=protein argonaute mel1 …	IPR003100 (Argonaute/Dicer protein, PAZ IPR012337 (Ribonuclease H-like
257	36	36	0	0	0	0	0	0	0	0	0	0
258	36	0	0	0	0	36	0	0	0	0	0	0
259	36	0	0	0	0	35	0	0	1	0	0	0
260	36	0	0	0	0	36	0	0	0	0	0	0
261	36	0	0	0	0	36	0	0	0	0	0	0
262	36	0	0	0	0	36	0	0	0	0	0	0
263	36	1	1	1	1	1	1	2	0	1	1	26	GO:0005634=>nucleus=>stip1_macfa ame: full=stress-induced-phosphoprotein 1 short=sti1 ame: full=hsc70 hsp90-organizing protein short=hop GO:0005737=>cytoplasm=>stip1_macfa ame: full=stress-induced-phosphoprotein 1 short=sti1 ame: full=hsc70 hsp90-organizing protein short=hop GO:0006986=>response to unfolded protein=>stip1_macfa ame: full=stress-induced-phosphoprotein 1 short=sti1 ame: full=hsc70 …	IPR006636 (Heat shock chaperonin-binding IPR011990 (Tetratricopeptide-like helical)	Hsp90 cochaperone, interacts with the Ssa group of the cytosolic Hsp70 chaperones and activates Ssa1p ATPase activity; interacts with Hsp90 chaperones and inhibits their ATPase activity; homolog of mammalian Hop
264	36	1	1	1	1	1	1	1	2	2	1	24	GO:0005739=>mitochondrion=>alr_human ame: full=fad-linked sulfhydryl oxidase alr ame: full=augmenter of liver regeneration short=herv1 ame: full=hepatopoietin GO:0006626=>protein targeting to mitochondrion=>alr_human ame: full=fad-linked sulfhydryl oxidase alr ame: full=augmenter of liver regeneration short=herv1 ame: full=hepatopoietin GO:0016972=>thiol oxidase activity=>alr_human ame: full=fad-…	IPR017905 (ERV/ALR sulphydryl oxidase)	Flavin-linked sulfhydryl oxidase of the mitochondrial intermembrane space (IMS), oxidizes Mia40p as part of a disulfide relay system that promotes IMS retention of imported proteins; ortholog of human hepatopoietin (ALR)
265	36	1	2	1	1	1	1	7	4	1	1	16	GO:0001726=>ruffle=>myo2a_naucc ame: full=myosin-2a ame: full=class v unconventional myosin myo2a ame: full=type v myosin heavy chain myo2a short=myosin v myo2a GO:0005516=>calmodulin binding=>myo2a_naucc ame: full=myosin-2a ame: full=class v unconventional myosin myo2a ame: full=type v myosin heavy chain myo2a short=myosin v myo2a GO:0005524=>ATP binding=>myo2a_naucc ame: full=myosin-2a ame: ful…	IPR000048 (IQ motif, EF-hand binding site IPR001609 (Myosin head, motor domain)	One of two type V myosin motors (along with MYO2) involved in actin-based transport of cargos; required for mRNA transport, including ASH1 mRNA, and facilitating the growth and movement of ER tubules into the growing bud along with She3p One of two type V myosin motors (along with MYO4) involved in actin-based transport of cargos; required for the polarized delivery of secretory vesicles, the vac…
266	36	1	1	1	1	1	1	2	2	1	1	24	GO:0005046=>KDEL sequence binding=>erd21_xentr ame: full=er lumen protein retaining receptor 1 ame: full=kdel endoplasmic reticulum protein retention receptor 1 short=kdel receptor 1 GO:0005789=>endoplasmic reticulum membrane=>erd21_xentr ame: full=er lumen protein retaining receptor 1 ame: full=kdel endoplasmic reticulum protein retention receptor 1 short=kdel receptor 1 GO:0005793=>endoplasmic …	IPR000133 (ER lumen protein retaining receptor)	HDEL receptor, an integral membrane protein that binds to the HDEL motif in proteins destined for retention in the endoplasmic reticulum; has a role in maintenance of normal levels of ER-resident proteins
267	36	2	1	2	2	1	1	3	3	2	2	17	GO:0005737=>cytoplasm=>dnpep_ricco ame: full=probable aspartyl aminopeptidase GO:0006518=>peptide metabolic process=>dnpep_ricco ame: full=probable aspartyl aminopeptidase GO:0008233=>peptidase activity=>dnpep_ricco ame: full=probable aspartyl aminopeptidase GO:0042802=>identical protein binding=>dnpep_ricco ame: full=probable aspartyl aminopeptidase)	IPR001948 (Peptidase M18)	Cytoplasmic aspartyl aminopeptidase that may also function in the vacuole; CVT pathway cargo protein; cleaves unblocked N-terminal acidic amino acids from peptide substrates; forms a 12-subunit homo-oligomer; M18 metalloprotease family
268	36	0	0	0	0	0	0	0	36	0	0	0
269	35	1	2	2	3	9	2	2	2	2	2	8	GO:0000166=>nucleotide binding=>u520_human ame: full=u5 small nuclear ribonucleoprotein 200 kda helicase ame: full=activating signal cointegrator 1 complex subunit 3-like 1 ame: full=brr2 homolog ame: full=u5 snrnp-specific 200 kda protein short=u5-200kd GO:0000354=>cis assembly of pre-catalytic spliceosome=>u520_human ame: full=u5 small nuclear ribonucleoprotein 200 kda helicase ame: full=activa…	IPR001650 (Helicase, C-terminal IPR003593 (ATPase, AAA+ type, core	RNA-dependent ATPase RNA helicase (DEIH box); required for disruption of U4/U6 base-pairing in native snRNPs to activate the spliceosome for catalysis; homologous to human U5-200kD Putative RNA helicase related to Ski2p, involved in translation inhibition of non-poly(A) mRNAs; required for repressing propagation of dsRNA viruses
270	35	35	0	0	0	0	0	0	0	0	0	0		IPR000477 (Reverse transcriptase) IPR012337 (Ribonuclease H-like) IPR012337 (Ribonuclease H-like) IPR002156 (Ribonuclease H domain)
271	35	11	1	2	3	12	1	2	1	0	2	0		IPR018712 (Domain of unknown function DUF2235)	Putative protein of unknown function; expression is increased greatly during sporulation; YEL023C is not an essential gene
272	35	35	0	0	0	0	0	0	0	0	0	0
273	35	35	0	0	0	0	0	0	0	0	0	0
274	35	34	0	0	0	1	0	0	0	0	0	0
275	35	3	1	1	2	3	1	3	2	1	0	18	GO:0000122=>negative regulation of transcription from RNA polymerase II promoter=>bas1_yeast ame: full=myb-like dna-binding protein bas1 GO:0003713=>transcription coactivator activity=>bas1_yeast ame: full=myb-like dna-binding protein bas1 GO:0005515=>protein binding=>bas1_yeast ame: full=myb-like dna-binding protein bas1 GO:0005730=>nucleolus=>bas1_yeast ame: full=myb-like dna-binding protein ba…	IPR009057 (Homeodomain-like IPR013087 (Zinc finger, C2H2-type/integrase, DNA-binding	Myb-related transcription factor involved in regulating basal and induced expression of genes of the purine and histidine biosynthesis pathways; also involved in regulation of meiotic recombination at specific genes
276	35	3	0	3	1	6	2	10	7	0	3	0	GO:0005576=>extracellular region=>ctsd_artbc ame: full=probable aspartic-type endopeptidase ctsd flags: precursor GO:0008233=>peptidase activity=>ctsd_artbc ame: full=probable aspartic-type endopeptidase ctsd flags: precursor) GO:0043231=>intracellular membrane-bounded organelle=>ctsd_artbc ame: full=probable aspartic-type endopeptidase ctsd flags: precursor) GO:0005634=>nucleus=>ctsd_aspfu ame: …	IPR001461 (Peptidase A1 IPR021109 (Peptidase aspartic)
277	35	3	0	2	2	6	2	5	3	0	4	8	GO:0004497=>monooxygenase activity=>c86b1_arath ame: full=cytochrome p450 86b1 GO:0005488=>binding=>c86b1_arath ame: full=cytochrome p450 86b1 GO:0005783=>endoplasmic reticulum=>c86b1_arath ame: full=cytochrome p450 86b1 GO:0009507=>chloroplast=>c86b1_arath ame: full=cytochrome p450 86b1 GO:0010345=>suberin biosynthetic process=>c86b1_arath ame: full=cytochrome p450 86b1 GO:0016117=>carotenoid bi…	IPR001128 (Cytochrome P450)
278	35	1	2	1	1	1	1	4	4	1	1	18	GO:0000184=>nuclear-transcribed mRNA catabolic process, nonsense-mediated decay=>rl17_human ame: full=60s ribosomal protein l17 ame: full=60s ribosomal protein l23 ame: full=pd-1 GO:0002119=>nematode larval development=>rl17_human ame: full=60s ribosomal protein l17 ame: full=60s ribosomal protein l23 ame: full=pd-1 GO:0003735=>structural constituent of ribosome=>rl17_human ame: full=60s ribosoma…	IPR001063 (Ribosomal protein L22/L17)	Protein component of the large (60S) ribosomal subunit, nearly identical to Rpl17Bp and has similarity to E. coli L22 and rat L17 ribosomal proteins; copurifies with the Dam1 complex (aka DASH complex) Protein component of the large (60S) ribosomal subunit, nearly identical to Rpl17Ap and has similarity to E. coli L22 and rat L17 ribosomal proteins
279	35	1	2	1	1	1	1	5	3	1	1	18	GO:0000287=>magnesium ion binding=>kpyk_yarli ame: full=pyruvate kinase short=pk GO:0004743=>pyruvate kinase activity=>kpyk_yarli ame: full=pyruvate kinase short=pk GO:0005515=>protein binding=>kpyk_yarli ame: full=pyruvate kinase short=pk GO:0005524=>ATP binding=>kpyk_yarli ame: full=pyruvate kinase short=pk GO:0005634=>nucleus=>kpyk_yarli ame: full=pyruvate kinase short=pk GO:0005829=>cytosol=>…	IPR001697 (Pyruvate kinase)	Pyruvate kinase, functions as a homotetramer in glycolysis to convert phosphoenolpyruvate to pyruvate, the input for aerobic (TCA cycle) or anaerobic (glucose fermentation) respiration Pyruvate kinase that appears to be modulated by phosphorylation; PYK2 transcription is repressed by glucose, and Pyk2p may be active under low glycolytic flux
280	35	0	0	0	0	0	0	0	0	0	0	35
281	35	1	2	1	1	1	1	4	4	1	1	18	GO:0000022=>mitotic spindle elongation=>rl18b_schpo ame: full=60s ribosomal protein l18-b GO:0000184=>nuclear-transcribed mRNA catabolic process, nonsense-mediated decay=>rl18b_schpo ame: full=60s ribosomal protein l18-b GO:0003723=>RNA binding=>rl18b_schpo ame: full=60s ribosomal protein l18-b GO:0003735=>structural constituent of ribosome=>rl18b_schpo ame: full=60s ribosomal protein l18-b GO:00…	IPR021131 (Ribosomal protein L18e/L15)	Protein component of the large (60S) ribosomal subunit, identical to Rpl18Ap and has similarity to rat L18 ribosomal protein Protein component of the large (60S) ribosomal subunit, identical to Rpl18Bp and has similarity to rat L18 ribosomal protein; intron of RPL18A pre-mRNA forms stem-loop structures that are a target for Rnt1p cleavage leading to degradation
282	35	2	2	2	2	2	2	6	5	2	2	8	GO:0001816=>cytokine production=>g6pd_emeni ame: full=glucose-6-phosphate 1-dehydrogenase short=g6pd GO:0004345=>glucose-6-phosphate dehydrogenase activity=>g6pd_emeni ame: full=glucose-6-phosphate 1-dehydrogenase short=g6pd GO:0005536=>glucose binding=>g6pd_emeni ame: full=glucose-6-phosphate 1-dehydrogenase short=g6pd GO:0005813=>centrosome=>g6pd_emeni ame: full=glucose-6-phosphate 1-dehydrogen…	IPR001282 (Glucose-6-phosphate dehydrogenase) IPR019133 (Mitochondrial inner membrane protein Mitofilin)	Mitochondrial inner membrane protein involved in formation and molecular structure of crista junctions; impairs oligomerization of F1F0-ATP synthase; null shows altered mitochondrial morphology and abnormal mitochondrial genome maintenance Glucose-6-phosphate dehydrogenase (G6PD), catalyzes the first step of the pentose phosphate pathway; involved in adapting to oxidatve stress; homolog of the hu…
283	35	0	0	0	0	0	0	0	0	0	0	35
284	35	0	0	0	0	0	0	0	0	35	0	0
285	34	11	0	0	0	0	0	0	0	23	0	0		IPR010993 (Sterile alpha motif homology)
286	34	22	1	1	1	1	1	1	2	1	1	2	GO:0006302=>double-strand break repair=>hus2_schpo ame: full=atp-dependent dna helicase hus2 rqh1 GO:0006310=>DNA recombination=>hus2_schpo ame: full=atp-dependent dna helicase hus2 rqh1 GO:0007049=>cell cycle=>hus2_schpo ame: full=atp-dependent dna helicase hus2 rqh1 GO:0008026=>ATP-dependent helicase activity=>hus2_schpo ame: full=atp-dependent dna helicase hus2 rqh1 GO:0008094=>DNA-dependent A…	IPR004589 (DNA helicase, ATP-dependent, RecQ type)	Nucleolar DNA helicase of the RecQ family; involved in genome integrity maintenance; regulates chromosome synapsis and meiotic joint molecule/crossover formation; potential role as repressor of a subset of rapamycin responsive genes; rapidly lost in response to rapamycin in Rrd1p-dependent manner; similar to human BLM and WRN proteins implicated in Bloom and Werner syndromes
287	34	22	0	0	0	10	2	0	0	0	0	0		IPR009057 (Homeodomain-like) IPR001584 (Integrase, catalytic core IPR009057 (Homeodomain-like) IPR002622 (Transposase, Synechocystis PCC 6803)
288	34	34	0	0	0	0	0	0	0	0	0	0
289	34	2	1	1	1	1	1	0	1	1	1	24	GO:0003008=>system process=>adhx_spaau ame: full=alcohol dehydrogenase class-3 ame: full=alcohol dehydrogenase class-iii ame: full=glutathione-dependent formaldehyde dehydrogenase short=faldh short=fdh short=gsh-fdh ame: full=s- glutathione dehydrogenase GO:0005504=>fatty acid binding=>adhx_spaau ame: full=alcohol dehydrogenase class-3 ame: full=alcohol dehydrogenase class-iii ame: full=glutathio…	IPR002085 (Alcohol dehydrogenase superfamily, zinc-containing IPR011032 (GroES-like	Bifunctional enzyme containing both alcohol dehydrogenase and glutathione-dependent formaldehyde dehydrogenase activities, functions in formaldehyde detoxification and formation of long chain and complex alcohols, regulated by Hog1p-Sko1p
290	34	7	1	1	1	1	1	3	3	1	1	14	GO:0000151=>ubiquitin ligase complex=>skp2b_arath ame: full=f-box protein skp2b ame: full=f-box lrr-repeat protein 5 short= 5 ame: full=skp2-like protein 2 short= 2 2 GO:0005515=>protein binding=>skp2b_arath ame: full=f-box protein skp2b ame: full=f-box lrr-repeat protein 5 short= 5 ame: full=skp2-like protein 2 short= 2 2 GO:0006511=>ubiquitin-dependent protein catabolic process=>skp2b_arath ame…	IPR006553 (Leucine-rich repeat, cysteine-containing subtype) IPR001611 (Leucine-rich repeat IPR006553 (Leucine-rich repeat, cysteine-containing subtype)	F-box protein component of the SCF ubiquitin-ligase complex; involved in carbon catabolite repression, glucose-dependent divalent cation transport, high-affinity glucose transport, morphogenesis, and sulfite detoxification
291	34	2	1	1	2	2	2	2	3	0	1	18	GO:0007588=>excretion=>grhpr_mouse ame: full=glyoxylate reductase hydroxypyruvate reductase GO:0008465=>glycerate dehydrogenase activity=>grhpr_mouse ame: full=glyoxylate reductase hydroxypyruvate reductase GO:0016618=>hydroxypyruvate reductase activity=>grhpr_mouse ame: full=glyoxylate reductase hydroxypyruvate reductase GO:0030267=>glyoxylate reductase (NADP) activity=>grhpr_mouse ame: full=gly…	IPR006139 (D-isomer specific 2-hydroxyacid dehydrogenase, catalytic domain)	Glyoxylate reductase; null mutation results in increased biomass after diauxic shift; the authentic, non-tagged protein is detected in highly purified mitochondria in high-throughput studies
292	34	34	0	0	0	0	0	0	0	0	0	0	GO:0009987=>cellular process=>fxl20_mouse ame: full=f-box lrr-repeat protein 20 ame: full=f-box and leucine-rich repeat protein 20 ame: full=f-box lrr-repeat protein 2-like GO:0019538=>protein metabolic process=>fxl20_mouse ame: full=f-box lrr-repeat protein 20 ame: full=f-box and leucine-rich repeat protein 20 ame: full=f-box lrr-repeat protein 2-like)	IPR006553 (Leucine-rich repeat, cysteine-containing subtype)
293	34	2	1	1	1	1	1	2	1	1	1	22	GO:0000086=>G2/M transition of mitotic cell cycle=>dc1i2_mouse ame: full=cytoplasmic dynein 1 intermediate chain 2 ame: full=cytoplasmic dynein intermediate chain 2 ame: full=dynein intermediate chain cytosolic short=dh ic-2 GO:0000776=>kinetochore=>dc1i2_mouse ame: full=cytoplasmic dynein 1 intermediate chain 2 ame: full=cytoplasmic dynein intermediate chain 2 ame: full=dynein intermediate chain…	IPR015943 (WD40/YVTN repeat-like-containing domain)	Dynein intermediate chain, acts in the cytoplasmic dynein pathway, forms cortical cytoplasmic microtubule capture site with Num1p; null mutant is defective in nuclear migration, essential in the absence of CIN8
294	34	0	0	0	0	32	0	0	0	0	2	0
295	34	3	2	1	2	3	4	3	2	2	2	10	GO:0001758=>retinal dehydrogenase activity=>al8a1_danre ame: full=aldehyde dehydrogenase family 8 member a1 GO:0005622=>intracellular=>al8a1_danre ame: full=aldehyde dehydrogenase family 8 member a1 GO:0009056=>catabolic process=>al8a1_danre ame: full=aldehyde dehydrogenase family 8 member a1 GO:0042574=>retinal metabolic process=>al8a1_danre ame: full=aldehyde dehydrogenase family 8 member a1 GO…	IPR016161 (Aldehyde/histidinol dehydrogenase) IPR008927 (6-phosphogluconate dehydrogenase, C-terminal-like IPR016040 (NAD(P)-binding domain)	Mitochondrial aldehyde dehydrogenase, involved in regulation or biosynthesis of electron transport chain components and acetate formation; activated by K+; utilizes NADP+ as the preferred coenzyme; constitutively expressed Mitochondrial aldehyde dehydrogenase, required for growth on ethanol and conversion of acetaldehyde to acetate; phosphorylated; activity is K+ dependent; utilizes NADP+ or NAD+…
296	34	0	0	4	1	1	3	5	2	0	5	13
297	34	1	1	1	2	1	1	2	1	1	1	22	GO:0005488=>binding=>rrp5_human ame: full=protein rrp5 homolog ame: full=nf-kappa-b-binding protein short=nfbp ame: full=programmed cell death protein 11 GO:0008380=>RNA splicing=>rrp5_human ame: full=protein rrp5 homolog ame: full=nf-kappa-b-binding protein short=nfbp ame: full=programmed cell death protein 11 GO:0030529=>ribonucleoprotein complex=>rrp5_human ame: full=protein rrp5 homolog ame: …	IPR008847 (Suppressor of forked IPR011990 (Tetratricopeptide-like helical	RNA binding protein with preference for single stranded tracts of U's involved in synthesis of both 18S and 5.8S rRNAs; component of both the ribosomal small subunit (SSU) processosome and the 90S preribosome
298	34	0	2	1	1	1	1	5	3	1	1	18			Protein component of the small (40S) ribosomal subunit, nearly identical to Rps0Bp; required for maturation of 18S rRNA along with Rps0Bp; deletion of either RPS0 gene reduces growth rate, deletion of both genes is lethal Protein component of the small (40S) ribosomal subunit, nearly identical to Rps0Ap; required for maturation of 18S rRNA along with Rps0Ap; deletion of either RPS0 gene reduces g…
299	34	1	1	1	1	1	1	1	1	1	1	24	GO:0001046=>core promoter sequence-specific DNA binding=>kthy_iiv6 ame: full= thymidylate kinase 251l ame: full=dtmp kinase GO:0001077=>RNA polymerase II core promoter proximal region sequence-specific DNA binding transcription factor activity involved in positive regulation of transcription=>kthy_iiv6 ame: full= thymidylate kinase 251l ame: full=dtmp kinase GO:0001822=>kidney development=>kthy_i…	IPR009071 (High mobility group, superfamily IPR018094 (Thymidylate kinase)	Thymidylate and uridylate kinase, functions in de novo biosynthesis of pyrimidine deoxyribonucleotides; converts dTMP to dTDP and dUMP to dUTP; essential for mitotic and meiotic DNA replication; homologous to S. pombe Tmp1p
300	34	1	1	1	1	1	1	1	1	1	1	24	GO:0004623=>phospholipase A2 activity=>prx1_yeast ame: full=mitochondrial peroxiredoxin prx1 ame: full=1-cys prx ame: full=mitochondrial thiol peroxidase short=mtpx ame: full=thioredoxin reductase GO:0005515=>protein binding=>prx1_yeast ame: full=mitochondrial peroxiredoxin prx1 ame: full=1-cys prx ame: full=mitochondrial thiol peroxidase short=mtpx ame: full=thioredoxin reductase GO:0006979=>res…	IPR012336 (Thioredoxin-like fold)	Mitochondrial peroxiredoxin (1-Cys Prx) with thioredoxin peroxidase activity, has a role in reduction of hydroperoxides; reactivation requires Trr2p and glutathione; induced during respiratory growth and oxidative stress; phosphorylated
301	34	1	1	1	2	1	1	4	3	1	1	18	GO:0000022=>mitotic spindle elongation=>rl10_drome ame: full=60s ribosomal protein l10 ame: full=qm protein homolog ame: full=dqm GO:0000184=>nuclear-transcribed mRNA catabolic process, nonsense-mediated decay=>rl10_drome ame: full=60s ribosomal protein l10 ame: full=qm protein homolog ame: full=dqm GO:0002119=>nematode larval development=>rl10_drome ame: full=60s ribosomal protein l10 ame: full=…	IPR001197 (Ribosomal protein L10e IPR016180 (Ribosomal protein L10e/L16)	Protein component of the large (60S) ribosomal subunit, responsible for joining the 40S and 60S subunits; regulates translation initiation; has similarity to rat L10 ribosomal protein and to members of the QM gene family
302	34	3	2	1	1	1	1	2	2	2	1	18	GO:0000085=>G2 phase of mitotic cell cycle=>ub2e3_human ame: full=ubiquitin-conjugating enzyme e2 e3 ame: full= 9 ame: full=ubiquitin carrier protein e3 ame: full=ubiquitin-conjugating enzyme e2-23 kda ame: full=ubiquitin-protein ligase e3 GO:0000122=>negative regulation of transcription from RNA polymerase II promoter=>ub2e3_human ame: full=ubiquitin-conjugating enzyme e2 e3 ame: full= 9 ame: fu…	IPR016135 (Ubiquitin-conjugating enzyme/RWD-like IPR023313 (Ubiquitin-conjugating enzyme, active site)	Ubiquitin-conjugating enzyme (E2), mediates degradation of abnormal or excess proteins, including calmodulin and histone H3; interacts with many SCF ubiquitin protein ligases; component of the cellular stress response Ubiquitin-conjugating enzyme that mediates selective degradation of short-lived, abnormal, or excess proteins, including histone H3; central component of the cellular stress respons…
303	34	2	0	1	1	1	1	3	4	2	1	18	GO:0000087=>M phase of mitotic cell cycle=>fbw1a_human ame: full=f-box wd repeat-containing protein 1a ame: full=e3rs ame: full=epididymis tissue protein li 2a ame: full=f-box and wd repeats protein beta- ame: full=p alpha-e3 receptor subunit GO:0003700=>sequence-specific DNA binding transcription factor activity=>fbw1a_human ame: full=f-box wd repeat-containing protein 1a ame: full=e3rs ame: ful…	IPR015943 (WD40/YVTN repeat-like-containing domain IPR020472 (G-protein beta WD-40 repeat
304	34	1	2	1	1	1	1	4	3	1	1	18	GO:0000184=>nuclear-transcribed mRNA catabolic process, nonsense-mediated decay=>rl34a_yeast ame: full=60s ribosomal protein l34-a GO:0001510=>RNA methylation=>rl34a_yeast ame: full=60s ribosomal protein l34-a GO:0003723=>RNA binding=>rl34a_yeast ame: full=60s ribosomal protein l34-a GO:0003735=>structural constituent of ribosome=>rl34a_yeast ame: full=60s ribosomal protein l34-a GO:0005730=>nucl…	IPR008195 (Ribosomal protein L34e)	Protein component of the large (60S) ribosomal subunit, nearly identical to Rpl34Ap and has similarity to rat L34 ribosomal protein Protein component of the large (60S) ribosomal subunit, nearly identical to Rpl34Bp and has similarity to rat L34 ribosomal protein
305	34	1	1	1	1	1	1	5	5	1	1	16	GO:0000178=>exosome (RNase complex)=>di3l2_human ame: full=dis3-like exonuclease 2 GO:0004527=>exonuclease activity=>di3l2_human ame: full=dis3-like exonuclease 2 GO:0004540=>ribonuclease activity=>di3l2_human ame: full=dis3-like exonuclease 2 GO:0005515=>protein binding=>di3l2_human ame: full=dis3-like exonuclease 2 GO:0008285=>negative regulation of cell proliferation=>di3l2_human ame: full=dis…	IPR001900 (Ribonuclease II/R IPR022966 (Ribonuclease II/R, conserved site)	Translational repressor with a role in cell wall polar growth and integrity; regulated by Cbk1p phosphorylation to effect bud-specific translational control of specific mRNAs; interacts with TOR pathway components
306	34	1	1	1	2	1	1	2	1	1	1	22	GO:0000184=>nuclear-transcribed mRNA catabolic process, nonsense-mediated decay=>rla0_schpo ame: full=60s acidic ribosomal protein p0 GO:0003723=>RNA binding=>rla0_schpo ame: full=60s acidic ribosomal protein p0 GO:0003735=>structural constituent of ribosome=>rla0_schpo ame: full=60s acidic ribosomal protein p0 GO:0003906=>DNA-(apurinic or apyrimidinic site) lyase activity=>rla0_schpo ame: full=6…	IPR001790 (Ribosomal protein L10/acidic P0 IPR001813 (Ribosomal protein 60S)	Conserved ribosomal protein P0 of the ribosomal stalk, which is involved in interaction between translational elongation factors and the ribosome; similar to rat P0, human P0, and E. coli L10e; phosphorylated on serine 302
307	34	1	1	1	0	1	1	3	3	1	1	21	GO:0005829=>cytosol=>ppid_rhio9 ame: full=peptidyl-prolyl cis-trans isomerase d short=ppiase d ame: full=cyclophilin d ame: full=rotamase d GO:0010050=>vegetative phase change=>ppid_rhio9 ame: full=peptidyl-prolyl cis-trans isomerase d short=ppiase d ame: full=cyclophilin d ame: full=rotamase d GO:0010582=>floral meristem determinacy=>ppid_rhio9 ame: full=peptidyl-prolyl cis-trans isomerase d sho…	IPR011990 (Tetratricopeptide-like helical IPR015891 (Cyclophilin-like	Peptidyl-prolyl cis-trans isomerase (cyclophilin), catalyzes the cis-trans isomerization of peptide bonds N-terminal to proline residues; binds to Hsp82p and contributes to chaperone activity
308	34	1	0	0	1	0	0	0	1	0	0	31		IPR017853 (Glycoside hydrolase, catalytic core)
309	34	1	1	1	1	1	1	1	1	1	1	24	GO:0005515=>protein binding=>dph1_schpo ame: full=diphthamide biosynthesis protein 1 GO:0005634=>nucleus=>dph1_schpo ame: full=diphthamide biosynthesis protein 1 GO:0005737=>cytoplasm=>dph1_schpo ame: full=diphthamide biosynthesis protein 1 GO:0006412=>translation=>dph1_schpo ame: full=diphthamide biosynthesis protein 1 GO:0008283=>cell proliferation=>dph1_schpo ame: full=diphthamide biosynthesis…	IPR002728 (Diphthamide synthesis, DPH1/DHP2)	Protein required, along with Dph2p, Kti11p, Jjj3p, and Dph5p, for synthesis of diphthamide, which is a modified histidine residue of translation elongation factor 2 (Eft1p or Eft2p); may act in a complex with Dph2p and Kti11p
310	34	1	1	1	1	1	1	2	1	1	1	23		IPR002672 (Ribosomal protein L28e IPR006958 (Mak16 protein)	Essential nuclear protein, constituent of 66S pre-ribosomal particles; required for maturation of 25S and 5.8S rRNAs; required for maintenance of M1 satellite double-stranded RNA of the L-A virus
311	34	34	0	0	0	0	0	0	0	0	0	0	GO:0001816=>cytokine production=>yr818_mimiv ame: full= serine threonine-protein kinase receptor r818 flags: precursor GO:0004674=>protein serine/threonine kinase activity=>yr818_mimiv ame: full= serine threonine-protein kinase receptor r818 flags: precursor GO:0004713=>protein tyrosine kinase activity=>yr818_mimiv ame: full= serine threonine-protein kinase receptor r818 flags: precursor GO:00055…
312	34	0	0	0	0	34	0	0	0	0	0	0
313	33	2	2	1	1	7	2	9	5	2	2	0	GO:0005488=>binding=>y1226_metja ame: full= cation-transporting atpase mj1226 GO:0016020=>membrane=>y1226_metja ame: full= cation-transporting atpase mj1226 GO:0016787=>hydrolase activity=>y1226_metja ame: full= cation-transporting atpase mj1226 GO:0044464=>cell part=>y1226_metja ame: full= cation-transporting atpase mj1226)	IPR001757 (ATPase, P-type, K/Mg/Cd/Cu/Zn/Na/Ca/Na/H-transporter IPR023214 (HAD-like domain	Plasma membrane H+-ATPase, pumps protons out of the cell; major regulator of cytoplasmic pH and plasma membrane potential; P2-type ATPase; Hsp30p plays a role in Pma1p regulation; interactions with Std1p appear to propagate [GAR+] Plasma membrane H+-ATPase, isoform of Pma1p, involved in pumping protons out of the cell; regulator of cytoplasmic pH and plasma membrane potential
314	33	28	0	0	0	0	0	5	0	0	0	0	GO:0004386=>helicase activity=>pif1_danre ame: full=atp-dependent dna helicase pif1 GO:0097159=>organic cyclic compound binding=>pif1_danre ame: full=atp-dependent dna helicase pif1 GO:1901363=>heterocyclic compound binding=>pif1_danre ame: full=atp-dependent dna helicase pif1) GO:0008026=>ATP-dependent helicase activity=>pif1_human ame: full=atp-dependent dna helicase pif1 ame: full=pif1 rrm3 dn…	IPR010285 (DNA helicase PIF1, ATP-dependent)
315	33	33	0	0	0	0	0	0	0	0	0	0		IPR007087 (Zinc finger, C2H2-type IPR008538 (Domain of unknown function DUF820 IPR008538 (Domain of unknown function DUF820 IPR012296 (Nuclease, putative, TT1808) IPR013761 (Sterile alpha motif-type) IPR011335 (Restriction endonuclease, type II-like
316	33	33	0	0	0	0	0	0	0	0	0	0
317	33	33	0	0	0	0	0	0	0	0	0	0		IPR013761 (Sterile alpha motif-type) IPR001660 (Sterile alpha motif domain) IPR010993 (Sterile alpha motif homology)
318	33	1	1	1	1	10	1	2	1	1	1	13	GO:0000139=>Golgi membrane=>gda1_aspfu ame: full=probable guanosine-diphosphatase short=gdpase GO:0004382=>guanosine-diphosphatase activity=>gda1_aspfu ame: full=probable guanosine-diphosphatase short=gdpase GO:0005576=>extracellular region=>gda1_aspfu ame: full=probable guanosine-diphosphatase short=gdpase GO:0006493=>protein O-linked glycosylation=>gda1_aspfu ame: full=probable guanosine-diphos…	IPR000407 (Nucleoside phosphatase GDA1/CD39)	Guanosine diphosphatase located in the Golgi, involved in the transport of GDP-mannose into the Golgi lumen by converting GDP to GMP after mannose is transferred its substrate
319	33	0	0	0	0	33	0	0	0	0	0	0
320	33	0	1	1	1	2	1	2	1	1	1	22			Coronin, cortical actin cytoskeletal component that associates with the Arp2p/Arp3p complex to regulate its activity; plays a role in regulation of actin patch assembly
321	33	0	0	0	0	33	0	0	0	0	0	0
322	33	1	1	1	1	3	1	1	1	0	1	22	GO:0000103=>sulfate assimilation=>kaps_emeni ame: full=adenylyl-sulfate kinase ame: full=atp adenosine-5 -phosphosulfate 3 -phosphotransferase ame: full=adenosine-5 -phosphosulfate kinase short=aps kinase GO:0001501=>skeletal system development=>kaps_emeni ame: full=adenylyl-sulfate kinase ame: full=atp adenosine-5 -phosphosulfate 3 -phosphotransferase ame: full=adenosine-5 -phosphosulfate kinase…	IPR002891 (Adenylylsulphate kinase, C-terminal)	Adenylylsulfate kinase, required for sulfate assimilation and involved in methionine metabolism
323	33	0	2	3	1	5	1	0	0	0	2	19			Plasma membrane high glucose sensor that regulates glucose transport; contains 12 predicted transmembrane segments and a long C-terminal tail required for induction of hexose transporters; highly similar to Snf3p Plasma membrane low glucose sensor that regulates glucose transport; contains 12 predicted transmembrane segments and a long C-terminal tail required for induction of hexose transporters…
324	33	1	1	1	1	1	0	2	0	1	1	24	GO:0002060=>purine nucleobase binding=>phsg_yeast ame: full=glycogen phosphorylase GO:0005524=>ATP binding=>phsg_yeast ame: full=glycogen phosphorylase GO:0005829=>cytosol=>phsg_yeast ame: full=glycogen phosphorylase GO:0005886=>plasma membrane=>phsg_yeast ame: full=glycogen phosphorylase GO:0005980=>glycogen catabolic process=>phsg_yeast ame: full=glycogen phosphorylase GO:0006006=>glucose metab…	IPR000811 (Glycosyl transferase, family 35)	Non-essential glycogen phosphorylase required for the mobilization of glycogen, activity is regulated by cyclic AMP-mediated phosphorylation, expression is regulated by stress-response elements and by the HOG MAP kinase pathway
325	33	1	2	1	1	1	1	4	2	1	1	18	GO:0000184=>nuclear-transcribed mRNA catabolic process, nonsense-mediated decay=>rl63_arath ame: full=60s ribosomal protein l6-3 GO:0001510=>RNA methylation=>rl63_arath ame: full=60s ribosomal protein l6-3 GO:0002119=>nematode larval development=>rl63_arath ame: full=60s ribosomal protein l6-3 GO:0003677=>DNA binding=>rl63_arath ame: full=60s ribosomal protein l6-3 GO:0003723=>RNA binding=>rl63_a…	IPR000915 (Ribosomal protein L6E IPR005568 (Ribosomal protein L6, N-terminal	Protein component of the large (60S) ribosomal subunit, has similarity to Rpl6Ap and to rat L6 ribosomal protein; binds to 5.8S rRNA N-terminally acetylated protein component of the large (60S) ribosomal subunit, has similarity to Rpl6Bp and to rat L6 ribosomal protein; binds to 5.8S rRNA
326	33	1	2	1	1	1	1	3	3	1	1	18	GO:0000184=>nuclear-transcribed mRNA catabolic process, nonsense-mediated decay=>rl4a_schpo ame: full=60s ribosomal protein l4-a ame: full=l2 GO:0001510=>RNA methylation=>rl4a_schpo ame: full=60s ribosomal protein l4-a ame: full=l2 GO:0003723=>RNA binding=>rl4a_schpo ame: full=60s ribosomal protein l4-a ame: full=l2 GO:0003735=>structural constituent of ribosome=>rl4a_schpo ame: full=60s ribosoma…	IPR002136 (Ribosomal protein L4/L1e)	N-terminally acetylated protein component of the large (60S) ribosomal subunit, nearly identical to Rpl4Bp and has similarity to E. coli L4 and rat L4 ribosomal proteins Protein component of the large (60S) ribosomal subunit, nearly identical to Rpl4Ap and has similarity to E. coli L4 and rat L4 ribosomal proteins
327	33	1	2	1	1	1	1	2	1	1	1	21		IPR000644 (Cystathionine beta-synthase, core)	One of two S. cerevisiae homologs (Sds23p and Sds24p) of the S. pombe Sds23 protein, which is implicated in APC/cyclosome regulation; involved in cell separation during budding; may play an indirect role in fluid-phase endocytosis One of two S. cerevisiae homologs (Sds23p and Sds24p) of the S. pombe Sds23 protein, which is implicated in APC/cyclosome regulation; involved in cell separation during…
328	33	0	0	0	1	0	0	0	0	0	0	32
329	33	0	1	0	1	1	2	1	0	1	1	25			Putative ABC transporter
330	33	1	1	1	1	1	1	3	2	1	1	20	GO:0005844=>polysome=>pabp_ustma ame: full=polyadenylate-binding cytoplasmic and nuclear short=pabp short=poly -binding protein ame: full=polyadenylate tail-binding protein GO:0006412=>translation=>pabp_ustma ame: full=polyadenylate-binding cytoplasmic and nuclear short=pabp short=poly -binding protein ame: full=polyadenylate tail-binding protein GO:0006810=>transport=>pabp_ustma ame: full=polyad…	IPR006515 (Polyadenylate binding protein, human types 1, 2, 3, 4 IPR012677 (Nucleotide-binding, alpha-beta plait)	Poly(A) binding protein, part of the 3'-end RNA-processing complex, mediates interactions between the 5' cap structure and the 3' mRNA poly(A) tail, involved in control of poly(A) tail length, interacts with translation factor eIF-4G
331	33	2	1	1	1	1	1	2	2	2	1	19	GO:0016740=>transferase activity=>metl_schpo ame: full=uncharacterized methyltransferase-like protein)	IPR013217 (Methyltransferase type 12) IPR017280 (Methyltransferase, METTL2, predicted)	AdoMet-dependent tRNA methyltransferase and actin binding protein; C-terminal domain is responsible for 3-methylcytidine modification of residue 32 of the tRNA anticodon loop of tRNA-Thr and tRNA-Ser and contains an S-adenosylmethionine (AdoMet) binding motif; N-terminal actin binding sequence interacts with actin filaments and localizes to actin patches and cables; N- and C-terminal domains are …
332	33	1	1	1	1	1	1	4	3	1	1	18	GO:0000056=>ribosomal small subunit export from nucleus=>rs15_elaol ame: full=40s ribosomal protein s15 GO:0000184=>nuclear-transcribed mRNA catabolic process, nonsense-mediated decay=>rs15_elaol ame: full=40s ribosomal protein s15 GO:0000312=>plastid small ribosomal subunit=>rs15_elaol ame: full=40s ribosomal protein s15 GO:0001510=>RNA methylation=>rs15_elaol ame: full=40s ribosomal protein s15…	IPR002222 (Ribosomal protein S19/S15)	Protein component of the small (40S) ribosomal subunit; has similarity to E. coli S19 and rat S15 ribosomal proteins
333	33	1	1	1	1	1	1	4	3	1	1	18	GO:0006412=>translation=>rl38a_schpo ame: full=60s ribosomal protein l38-1 GO:0016071=>mRNA metabolic process=>rl38a_schpo ame: full=60s ribosomal protein l38-1 GO:0019058=>viral infectious cycle=>rl38a_schpo ame: full=60s ribosomal protein l38-1 GO:0022625=>cytosolic large ribosomal subunit=>rl38a_schpo ame: full=60s ribosomal protein l38-1 GO:0044699=>single-organism process=>rl38a_schpo ame: f…	IPR002675 (Ribosomal protein L38e)	Protein component of the large (60S) ribosomal subunit, has similarity to rat L38 ribosomal protein
334	33	0	1	1	1	1	1	1	1	1	1	24			Nuclear envelope protein that mediates the nuclear export of importin alpha (Srp1p), homolog of metazoan CAS protein, required for accurate chromosome segregation
335	33	1	1	2	2	2	2	1	1	1	2	18	GO:0000038=>very long-chain fatty acid metabolic process=>thik_yeast ame: full=3-ketoacyl- peroxisomal ame: full=acetyl- acyltransferase ame: full=beta-ketothiolase ame: full=peroxisomal 3-oxoacyl- thiolase flags: precursor GO:0003985=>acetyl-CoA C-acetyltransferase activity=>thik_yeast ame: full=3-ketoacyl- peroxisomal ame: full=acetyl- acyltransferase ame: full=beta-ketothiolase ame: full=perox…	IPR002155 (Thiolase IPR016039 (Thiolase-like)	3-ketoacyl-CoA thiolase with broad chain length specificity, cleaves 3-ketoacyl-CoA into acyl-CoA and acetyl-CoA during beta-oxidation of fatty acids
336	33	1	1	1	1	1	1	1	1	2	1	22	GO:0000287=>magnesium ion binding=>gshb_xenla ame: full=glutathione synthetase short=gsh synthetase short=gsh-s ame: full=glutathione synthase GO:0004363=>glutathione synthase activity=>gshb_xenla ame: full=glutathione synthetase short=gsh synthetase short=gsh-s ame: full=glutathione synthase GO:0005524=>ATP binding=>gshb_xenla ame: full=glutathione synthetase short=gsh synthetase short=gsh-s ame…	IPR005615 (Glutathione synthase, eukaryotic IPR013816 (ATP-grasp fold, subdomain 2	Glutathione synthetase, catalyzes the ATP-dependent synthesis of glutathione (GSH) from gamma-glutamylcysteine and glycine; induced by oxidative stress and heat shock
337	33	1	2	2	1	1	1	5	5	1	2	12	GO:0000166=>nucleotide binding=>ded1_neucr ame: full=atp-dependent rna helicase ded-1 GO:0003677=>DNA binding=>ded1_neucr ame: full=atp-dependent rna helicase ded-1 GO:0004003=>ATP-dependent DNA helicase activity=>ded1_neucr ame: full=atp-dependent rna helicase ded-1 GO:0004004=>ATP-dependent RNA helicase activity=>ded1_neucr ame: full=atp-dependent rna helicase ded-1 GO:0005634=>nucleus=>ded1_ne…	IPR001650 (Helicase, C-terminal IPR014014 (RNA helicase, DEAD-box type, Q motif	ATP-dependent DEAD (Asp-Glu-Ala-Asp)-box RNA helicase, required for translation initiation of all yeast mRNAs; mutations in human DEAD-box DBY are a frequent cause of male infertility Putative ATP-dependent RNA helicase of the DEAD-box protein family; mutants show reduced stability of the 40S ribosomal subunit scanning through 5' untranslated regions of mRNAs
338	33	33	0	0	0	0	0	0	0	0	0	0		IPR003450 (Replication origin-binding protein)
339	33	33	0	0	0	0	0	0	0	0	0	0		IPR013087 (Zinc finger, C2H2-type/integrase, DNA-binding) IPR007087 (Zinc finger, C2H2-type)
340	32	1	1	1	1	4	1	1	1	2	1	18	GO:0000166=>nucleotide binding=>ino1_nicpa ame: full=inositol-3-phosphate synthase short=mip synthase ame: full=myo-inositol 1-phosphate synthase short=ips short=mi-1-p synthase GO:0004512=>inositol-3-phosphate synthase activity=>ino1_nicpa ame: full=inositol-3-phosphate synthase short=mip synthase ame: full=myo-inositol 1-phosphate synthase short=ips short=mi-1-p synthase GO:0005737=>cytoplasm=>…	IPR002587 (Myo-inositol-1-phosphate synthase)	Inositol-3-phosphate synthase, involved in synthesis of inositol phosphates and inositol-containing phospholipids; transcription is coregulated with other phospholipid biosynthetic genes by Ino2p and Ino4p, which bind the UASINO DNA element
341	32	0	0	0	0	0	0	0	0	32	0	0
342	32	31	0	0	0	1	0	0	0	0	0	0	GO:0000902=>cell morphogenesis=>gima5_human ame: full=gtpase imap family member 5 ame: full=immunity-associated nucleotide 4-like 1 protein ame: full=immunity-associated nucleotide 5 protein short=ian-5 short=hian5 ame: full=immunity-associated protein 3 GO:0001745=>compound eye morphogenesis=>gima5_human ame: full=gtpase imap family member 5 ame: full=immunity-associated nucleotide 4-like 1 prot…
343	32	3	2	1	1	1	1	7	4	1	1	10	GO:0001649=>osteoblast differentiation=>nf1_rat ame: full=neurofibromin ame: full=neurofibromatosis-related protein nf-1 GO:0001656=>metanephros development=>nf1_rat ame: full=neurofibromin ame: full=neurofibromatosis-related protein nf-1 GO:0001666=>response to hypoxia=>nf1_rat ame: full=neurofibromin ame: full=neurofibromatosis-related protein nf-1 GO:0001889=>liver development=>nf1_rat ame: fu…	IPR008936 (Rho GTPase activation protein) IPR001251 (Cellular retinaldehyde-binding/triple function, C-terminal IPR008936 (Rho GTPase activation protein	GTPase-activating protein that negatively regulates RAS by converting it from the GTP- to the GDP-bound inactive form, required for reducing cAMP levels under nutrient limiting conditions, mediates membrane association of adenylate cyclase GTPase-activating protein that negatively regulates RAS by converting it from the GTP- to the GDP-bound inactive form, required for reducing cAMP levels under …
344	32	2	1	1	1	1	1	2	3	1	1	18	GO:0003677=>DNA binding=>pcka_emeni ame: full=phosphoenolpyruvate carboxykinase GO:0004612=>phosphoenolpyruvate carboxykinase (ATP) activity=>pcka_emeni ame: full=phosphoenolpyruvate carboxykinase GO:0005524=>ATP binding=>pcka_emeni ame: full=phosphoenolpyruvate carboxykinase GO:0005730=>nucleolus=>pcka_emeni ame: full=phosphoenolpyruvate carboxykinase GO:0005829=>cytosol=>pcka_emeni ame: full=ph…	IPR001272 (Phosphoenolpyruvate carboxykinase, ATP-utilising IPR015590 (Aldehyde dehydrogenase domain)	Phosphoenolpyruvate carboxykinase, key enzyme in gluconeogenesis, catalyzes early reaction in carbohydrate biosynthesis, glucose represses transcription and accelerates mRNA degradation, regulated by Mcm1p and Cat8p, located in the cytosol
345	32	2	1	1	1	1	2	1	1	1	1	20	GO:0005515=>protein binding=>reep5_bovin ame: full=receptor expression-enhancing protein 5) GO:0016020=>membrane=>yop1_mago7 ame: full=protein yop1)	IPR004345 (TB2/DP1/HVA22-related protein)	Membrane protein that interacts with Yip1p to mediate membrane traffic; interacts with Sey1p to maintain ER morphology; overexpression leads to cell death and accumulation of internal cell membranes
346	32	0	0	0	0	32	0	0	0	0	0	0
347	32	0	0	0	0	32	0	0	0	0	0	0
348	32	0	0	0	0	32	0	0	0	0	0	0
349	32	2	1	1	1	1	2	2	2	1	1	18	GO:0000085=>G2 phase of mitotic cell cycle=>clr6_schpo ame: full=histone deacetylase clr6 ame: full=cryptic loci regulator 6 GO:0000122=>negative regulation of transcription from RNA polymerase II promoter=>clr6_schpo ame: full=histone deacetylase clr6 ame: full=cryptic loci regulator 6 GO:0000792=>heterochromatin=>clr6_schpo ame: full=histone deacetylase clr6 ame: full=cryptic loci regulator 6 G…	IPR000286 (Histone deacetylase superfamily)	Histone deacetylase; regulates transcription, silencing, and other processes by influencing chromatin remodeling; forms at least two different complexes which have distinct functions and members
350	32	1	1	1	1	1	1	1	1	1	1	22	GO:0000003=>reproduction=>syic_schpo ame: full=isoleucine--trna cytoplasmic ame: full=isoleucyl-trna synthetase short= GO:0000166=>nucleotide binding=>syic_schpo ame: full=isoleucine--trna cytoplasmic ame: full=isoleucyl-trna synthetase short= GO:0004822=>isoleucine-tRNA ligase activity=>syic_schpo ame: full=isoleucine--trna cytoplasmic ame: full=isoleucyl-trna synthetase short= GO:0005515=>prote…	IPR002301 (Isoleucyl-tRNA synthetase, class Ia IPR009080 (Aminoacyl-tRNA synthetase, class 1a, anticodon-binding)	Cytoplasmic isoleucine-tRNA synthetase, target of the G1-specific inhibitor reveromycin A
351	32	0	2	1	1	1	1	4	2	1	1	18			Protein component of the small (40S) ribosomal subunit, nearly identical to Rps7Ap; interacts with Kti11p; deletion causes hypersensitivity to zymocin; has similarity to rat S7 and Xenopus S8 ribosomal proteins Protein component of the small (40S) ribosomal subunit, nearly identical to Rps7Bp; interacts with Kti11p; deletion causes hypersensitivity to zymocin; has similarity to rat S7 and Xenopus…
352	32	0	0	0	0	0	0	0	0	0	0	32
353	32	1	2	1	1	1	1	2	3	1	1	18	GO:0003735=>structural constituent of ribosome=>rs3a_lacbs ame: full=40s ribosomal protein s1 GO:0005618=>cell wall=>rs3a_lacbs ame: full=40s ribosomal protein s1 GO:0005730=>nucleolus=>rs3a_lacbs ame: full=40s ribosomal protein s1 GO:0005886=>plasma membrane=>rs3a_lacbs ame: full=40s ribosomal protein s1 GO:0006412=>translation=>rs3a_lacbs ame: full=40s ribosomal protein s1 GO:0009507=>chloropla…	IPR001593 (Ribosomal protein S3Ae)	Ribosomal protein 10 (rp10) of the small (40S) subunit; nearly identical to Rps1Bp and has similarity to rat S3a ribosomal protein Ribosomal protein 10 (rp10) of the small (40S) subunit; nearly identical to Rps1Ap and has similarity to rat S3a ribosomal protein
354	32	1	1	1	1	1	1	1	1	1	1	22	GO:0003743=>translation initiation factor activity=>if2p_schpo ame: full=eukaryotic translation initiation factor 5b short=eif-5b ame: full=translation initiation factor if-2 GO:0005515=>protein binding=>if2p_schpo ame: full=eukaryotic translation initiation factor 5b short=eif-5b ame: full=translation initiation factor if-2 GO:0005829=>cytosol=>if2p_schpo ame: full=eukaryotic translation initiat…	IPR009000 (Translation elongation/initiation factor/Ribosomal, beta-barrel IPR015760 (Translation initiation factor IF- 2	GTPase, required for general translation initiation by promoting Met-tRNAiMet binding to ribosomes and ribosomal subunit joining; homolog of bacterial IF2
355	32	2	1	1	1	1	1	1	3	2	1	18	GO:0005759=>mitochondrial matrix=>pcca_mouse ame: full=propionyl- carboxylase alpha mitochondrial short=pccase subunit alpha ame: full=propanoyl- :carbon dioxide ligase subunit alpha flags: precursor GO:0006635=>fatty acid beta-oxidation=>pcca_mouse ame: full=propionyl- carboxylase alpha mitochondrial short=pccase subunit alpha ame: full=propanoyl- :carbon dioxide ligase subunit alpha flags: prec…	IPR000089 (Biotin/lipoyl attachment IPR011761 (ATP-grasp fold IPR003807 (Protein of unknown function DUF202	Vacuolar membrane polyphosphate polymerase; subunit of the vacuolar transporter chaperone (VTC) complex involved in synthesis and transfer of polyP to the vacuole; regulates membrane trafficking; role in non-autophagic vacuolar fusion
356	32	1	2	1	1	1	1	3	2	1	1	18	GO:0004616=>phosphogluconate dehydrogenase (decarboxylating) activity=>6pgd_cunel ame: full=6-phosphogluconate decarboxylating GO:0005829=>cytosol=>6pgd_cunel ame: full=6-phosphogluconate decarboxylating GO:0009051=>pentose-phosphate shunt, oxidative branch=>6pgd_cunel ame: full=6-phosphogluconate decarboxylating GO:0019322=>pentose biosynthetic process=>6pgd_cunel ame: full=6-phosphogluconate de…	IPR006183 (6-phosphogluconate dehydrogenase/3-hydroxyisobutyrate dehydrogenase IPR008927 (6-phosphogluconate dehydrogenase, C-terminal-like	6-phosphogluconate dehydrogenase (decarboxylating), catalyzes an NADPH regenerating reaction in the pentose phosphate pathway; required for growth on D-glucono-delta-lactone and adaptation to oxidative stress 6-phosphogluconate dehydrogenase (decarboxylating), catalyzes an NADPH regenerating reaction in the pentose phosphate pathway; required for growth on D-glucono-delta-lactone
357	32	0	0	0	0	0	0	0	0	0	0	32
358	31	0	0	0	0	0	0	0	0	31	0	0
359	31	1	2	1	1	2	1	1	1	2	1	18	GO:0003937=>IMP cyclohydrolase activity=>pur9_schpo ame: full=bifunctional purine biosynthesis protein ade10 includes: ame: full=phosphoribosylaminoimidazolecarboxamide formyltransferase ame: full=5-aminoimidazole-4-carboxamide ribonucleotide formyltransferase ame: full=aicar transformylase includes: ame: full=imp cyclohydrolase ame: full=atic ame: full=imp synthase ame: full=inosinicase GO:00046…	IPR002695 (AICARFT/IMPCHase bienzyme IPR016193 (Cytidine deaminase-like)	Enzyme of 'de novo' purine biosynthesis containing both 5-aminoimidazole-4-carboxamide ribonucleotide transformylase and inosine monophosphate cyclohydrolase activities, isozyme of Ade17p; ade16 ade17 mutants require adenine and histidine Enzyme of 'de novo' purine biosynthesis containing both 5-aminoimidazole-4-carboxamide ribonucleotide transformylase and inosine monophosphate cyclohydrolase ac…
360	31	1	1	1	1	1	1	2	2	2	1	18	GO:0004360=>glutamine-fructose-6-phosphate transaminase (isomerizing) activity=>gfa1_yeast ame: full=glucosamine--fructose-6-phosphate aminotransferase short=gfat ame: full=d-fructose-6-phosphate amidotransferase ame: full=hexosephosphate aminotransferase GO:0005488=>binding=>gfa1_yeast ame: full=glucosamine--fructose-6-phosphate aminotransferase short=gfat ame: full=d-fructose-6-phosphate amidot…	IPR005855 (Glucosamine-fructose-6-phosphate aminotransferase, isomerising IPR017932 (Glutamine amidotransferase, type II)	Glutamine-fructose-6-phosphate amidotransferase, catalyzes the formation of glucosamine-6-P and glutamate from fructose-6-P and glutamine in the first step of chitin biosynthesis
361	31	30	0	0	0	0	0	1	0	0	0	0		IPR013216 (Methyltransferase type 11)
362	31	9	1	2	1	1	2	2	6	0	3	4	GO:0005634=>nucleus=>p1_arath ame: full=nadp-dependent alkenal double bond reductase p1 short=dbr1 GO:0005829=>cytosol=>p1_arath ame: full=nadp-dependent alkenal double bond reductase p1 short=dbr1 GO:0006865=>amino acid transport=>p1_arath ame: full=nadp-dependent alkenal double bond reductase p1 short=dbr1 GO:0006979=>response to oxidative stress=>p1_arath ame: full=nadp-dependent alkenal doubl…	IPR002085 (Alcohol dehydrogenase superfamily, zinc-containing IPR011032 (GroES-like IPR002016 (Haem peroxidase, plant/fungal/bacterial	Putative protein of unknown function with similarity to medium chain dehydrogenase/reductases; expression induced by stresses including osmotic shock, DNA damaging agents, and other chemicals; GFP-fusion protein localizes to the cytoplasm
363	31	14	1	3	1	2	2	0	6	0	2	0	GO:0003677=>DNA binding=>yakc_schpo ame: full=aldo-keto reductase yakc GO:0003700=>sequence-specific DNA binding transcription factor activity=>yakc_schpo ame: full=aldo-keto reductase yakc GO:0005829=>cytosol=>yakc_schpo ame: full=aldo-keto reductase yakc GO:0005886=>plasma membrane=>yakc_schpo ame: full=aldo-keto reductase yakc GO:0006094=>gluconeogenesis=>yakc_schpo ame: full=aldo-keto reducta…	IPR001395 (Aldo/keto reductase IPR023210 (NADP-dependent oxidoreductase domain)	Protein of unknown function, differentially expressed during alcoholic fermentation; expression activated by transcription factor YRM1/YOR172W; green fluorescent protein (GFP)-fusion protein localizes to both the cytoplasm and the nucleus
364	31	31	0	0	0	0	0	0	0	0	0	0	GO:0005488=>binding=>muc20_human ame: full=mucin-20 short=muc-20 flags: precursor GO:0010467=>gene expression=>muc20_human ame: full=mucin-20 short=muc-20 flags: precursor GO:0016070=>RNA metabolic process=>muc20_human ame: full=mucin-20 short=muc-20 flags: precursor GO:0044428=>nuclear part=>muc20_human ame: full=mucin-20 short=muc-20 flags: precursor GO:0050794=>regulation of cellular process=>…
365	31	2	1	1	1	1	1	1	2	1	1	19	GO:0005515=>protein binding=>dnjb4_mouse ame: full= homolog subfamily b member 4 GO:0005634=>nucleus=>dnjb4_mouse ame: full= homolog subfamily b member 4 GO:0005737=>cytoplasm=>dnjb4_mouse ame: full= homolog subfamily b member 4 GO:0006915=>apoptotic process=>dnjb4_mouse ame: full= homolog subfamily b member 4 GO:0006950=>response to stress=>dnjb4_mouse ame: full= homolog subfamily b member 4 GO:…	IPR015609 (Molecular chaperone, heat shock protein, Hsp40, DnaJ)	Type II HSP40 co-chaperone that interacts with the HSP70 protein Ssa1p; not functionally redundant with Ydj1p due to due to substrate specificity; shares similarity with bacterial DnaJ proteins
366	31	3	1	3	2	6	2	4	3	1	6	0		IPR011701 (Major facilitator superfamily MFS-1 IPR016196 (Major facilitator superfamily, general substrate transporter)	High affinity nicotinic acid plasma membrane permease, responsible for uptake of low levels of nicotinic acid; expression of the gene increases in the absence of extracellular nicotinic acid or para-aminobenzoate (PABA)
367	31	2	0	1	1	0	0	0	1	1	1	24	GO:0005768=>endosome=>flot1_orysj ame: full=flotillin-like protein 1 ame: full=nodulin-like protein 1 GO:0005774=>vacuolar membrane=>flot1_orysj ame: full=flotillin-like protein 1 ame: full=nodulin-like protein 1 GO:0006897=>endocytosis=>flot1_orysj ame: full=flotillin-like protein 1 ame: full=nodulin-like protein 1 GO:0007165=>signal transduction=>flot1_orysj ame: full=flotillin-like protein 1 a…	IPR001107 (Band 7 protein)
368	31	2	1	1	1	1	1	2	1	2	1	18	GO:0004130=>cytochrome-c peroxidase activity=>ccpr_aspfu ame: full=cytochrome c mitochondrial short=ccp flags: precursor GO:0005758=>mitochondrial intermembrane space=>ccpr_aspfu ame: full=cytochrome c mitochondrial short=ccp flags: precursor GO:0005759=>mitochondrial matrix=>ccpr_aspfu ame: full=cytochrome c mitochondrial short=ccp flags: precursor GO:0020037=>heme binding=>ccpr_aspfu ame: full=…	IPR010255 (Haem peroxidase)	Mitochondrial cytochrome-c peroxidase; degrades reactive oxygen species in mitochondria, involved in the response to oxidative stress
369	31	1	1	1	1	2	1	2	2	1	1	18	GO:0006520=>cellular amino acid metabolic process=>dhe2_neucr ame: full=nad-specific glutamate dehydrogenase short=nad-gdh GO:0016491=>oxidoreductase activity=>dhe2_neucr ame: full=nad-specific glutamate dehydrogenase short=nad-gdh)	IPR016040 (NAD(P)-binding domain IPR016210 (Glutamate dehydrogenase, NAD-dependent)	NAD(+)-dependent glutamate dehydrogenase, degrades glutamate to ammonia and alpha-ketoglutarate; expression sensitive to nitrogen catabolite repression and intracellular ammonia levels
370	31	0	0	0	0	31	0	0	0	0	0	0
371	31	1	1	1	1	3	2	1	1	1	1	18	GO:0005829=>cytosol=>yaof_schpo ame: full=uncharacterized protein GO:0006750=>glutathione biosynthetic process=>yaof_schpo ame: full=uncharacterized protein GO:0006751=>glutathione catabolic process=>yaof_schpo ame: full=uncharacterized protein GO:0006805=>xenobiotic metabolic process=>yaof_schpo ame: full=uncharacterized protein GO:0009506=>plasmodesma=>yaof_schpo ame: full=uncharacterized prote…	IPR002821 (Hydantoinase/oxoprolinase IPR003692 (Hydantoinase B/oxoprolinase	5-oxoprolinase; enzyme is ATP-dependent and functions as a dimer; similar to mouse Oplah gene; green fluorescent protein (GFP)-fusion protein localizes to the cytoplasm
372	31	1	2	1	1	1	1	3	2	1	1	17	GO:0000114=>regulation of transcription involved in G1 phase of mitotic cell cycle=>bdf1_schpo ame: full=swr1 complex bromodomain subunit bdf1 GO:0000790=>nuclear chromatin=>bdf1_schpo ame: full=swr1 complex bromodomain subunit bdf1 GO:0000794=>condensed nuclear chromosome=>bdf1_schpo ame: full=swr1 complex bromodomain subunit bdf1 GO:0001833=>inner cell mass cell proliferation=>bdf1_schpo ame: f…	IPR001487 (Bromodomain)	Protein involved in transcription initiation at TATA-containing promoters; associates with the basal transcription factor TFIID; contains two bromodomains; corresponds to the C-terminal region of mammalian TAF1; redundant with Bdf1p Protein involved in transcription initiation at TATA-containing promoters; associates with the basal transcription factor TFIID; contains two bromodomains; correspond…
373	31	1	1	1	1	1	1	1	1	1	1	21	GO:0000166=>nucleotide binding=>syyc_bovin ame: full=tyrosine--trna cytoplasmic ame: full=tyrosyl-trna synthetase short= GO:0003723=>RNA binding=>syyc_bovin ame: full=tyrosine--trna cytoplasmic ame: full=tyrosyl-trna synthetase short= GO:0004831=>tyrosine-tRNA ligase activity=>syyc_bovin ame: full=tyrosine--trna cytoplasmic ame: full=tyrosyl-trna synthetase short= GO:0004871=>signal transducer ac…	IPR002305 (Aminoacyl-tRNA synthetase, class Ib IPR002307 (Tyrosyl-tRNA synthetase, class Ib	Cytoplasmic tyrosyl-tRNA synthetase, required for cytoplasmic protein synthesis; interacts with positions 34 and 35 of the tRNATyr anticodon; mutations in human ortholog YARS are associated with Charcot-Marie-Tooth (CMT) neuropathies
374	31	1	1	1	1	1	1	3	3	1	0	18	GO:0000018=>regulation of DNA recombination=>ima1_schpo ame: full=importin subunit alpha-1 ame: full=cell untimely torn protein 15 ame: full=karyopherin subunit alpha-1 ame: full=serine-rich rna polymerase i suppressor protein GO:0005515=>protein binding=>ima1_schpo ame: full=importin subunit alpha-1 ame: full=cell untimely torn protein 15 ame: full=karyopherin subunit alpha-1 ame: full=serine-ri…	IPR002652 (Importin-alpha-like, importin-beta-binding domain IPR016024 (Armadillo-type fold)	Karyopherin alpha homolog, forms a dimer with karyopherin beta Kap95p to mediate import of nuclear proteins, binds the nuclear localization signal of the substrate during import; may also play a role in regulation of protein degradation
375	31	1	2	1	1	2	2	3	4	1	2	12	GO:0003735=>structural constituent of ribosome=>rl44_copci ame: full=60s ribosomal protein l44 ame: full=60s ribosomal protein l41 GO:0005840=>ribosome=>rl44_copci ame: full=60s ribosomal protein l44 ame: full=60s ribosomal protein l41 GO:0006412=>translation=>rl44_copci ame: full=60s ribosomal protein l44 ame: full=60s ribosomal protein l41 GO:0046677=>response to antibiotic=>rl44_copci ame: ful…	IPR011332 (Ribosomal protein, zinc-binding domain)	Protein component of the large (60S) ribosomal subunit, identical to Rpl42Ap and has similarity to rat L44; required for propagation of the killer toxin-encoding M1 double-stranded RNA satellite of the L-A double-stranded RNA virus Protein component of the large (60S) ribosomal subunit, identical to Rpl42Bp and has similarity to rat L44 ribosomal protein
376	31	1	1	1	1	1	1	3	2	1	1	18	GO:0000122=>negative regulation of transcription from RNA polymerase II promoter=>xpo1_schpo ame: full=exportin-1 ame: full=caffeine resistance protein 2 ame: full=chromosome region maintenance protein 1 GO:0000236=>mitotic prometaphase=>xpo1_schpo ame: full=exportin-1 ame: full=caffeine resistance protein 2 ame: full=chromosome region maintenance protein 1 GO:0000776=>kinetochore=>xpo1_schpo ame…	IPR016024 (Armadillo-type fold)	Major karyopherin, involved in export of proteins, RNAs, and ribosomal subunits from the nucleus; exportin
377	31	1	1	1	1	1	1	2	3	1	1	18	GO:0000184=>nuclear-transcribed mRNA catabolic process, nonsense-mediated decay=>rl5_subdo ame: full=60s ribosomal protein l5 GO:0005515=>protein binding=>rl5_subdo ame: full=60s ribosomal protein l5 GO:0005634=>nucleus=>rl5_subdo ame: full=60s ribosomal protein l5 GO:0006364=>rRNA processing=>rl5_subdo ame: full=60s ribosomal protein l5 GO:0006413=>translational initiation=>rl5_subdo ame: full=6…	IPR005484 (Ribosomal protein L18/L5)	Protein component of the large (60S) ribosomal subunit with similarity to E. coli L18 and rat L5 ribosomal proteins; binds 5S rRNA and is required for 60S subunit assembly
378	31	1	1	1	1	1	1	1	1	1	1	21	GO:0004122=>cystathionine beta-synthase activity=>cbs_dicdi ame: full=cystathionine beta-synthase ame: full=beta-thionase ame: full=serine sulfhydrase GO:0004124=>cysteine synthase activity=>cbs_dicdi ame: full=cystathionine beta-synthase ame: full=beta-thionase ame: full=serine sulfhydrase GO:0005576=>extracellular region=>cbs_dicdi ame: full=cystathionine beta-synthase ame: full=beta-thionase a…	IPR005857 (Cystathionine beta-synthase IPR013785 (Aldolase-type TIM barrel)	Cystathionine beta-synthase, catalyzes synthesis of cystathionine from serine and homocysteine, the first committed step in cysteine biosynthesis; responsible for hydrogen sulfide generation; mutations in human ortholog cause homocystinuria
379	31	1	1	1	1	1	1	2	1	1	1	20	GO:0005783=>endoplasmic reticulum=>ero1_neucr ame: full=endoplasmic oxidoreductin-1 flags: precursor GO:0006457=>protein folding=>ero1_neucr ame: full=endoplasmic oxidoreductin-1 flags: precursor GO:0016491=>oxidoreductase activity=>ero1_neucr ame: full=endoplasmic oxidoreductin-1 flags: precursor GO:0051716=>cellular response to stimulus=>ero1_neucr ame: full=endoplasmic oxidoreductin-1 flags: p…	IPR007266 (Endoplasmic reticulum oxidoreductin 1)	Thiol oxidase required for oxidative protein folding in the endoplasmic reticulum
380	31	1	1	1	1	1	1	2	3	1	1	18	GO:0000184=>nuclear-transcribed mRNA catabolic process, nonsense-mediated decay=>rs3_ambme ame: full=40s ribosomal protein s3 GO:0001510=>RNA methylation=>rs3_ambme ame: full=40s ribosomal protein s3 GO:0002119=>nematode larval development=>rs3_ambme ame: full=40s ribosomal protein s3 GO:0003684=>damaged DNA binding=>rs3_ambme ame: full=40s ribosomal protein s3 GO:0003729=>mRNA binding=>rs3_ambme…	IPR005703 (Ribosomal protein S3, eukaryotic/archaeal IPR015946 (K homology domain-like, alpha/beta)	Protein component of the small (40S) ribosomal subunit, has apurinic/apyrimidinic (AP) endonuclease activity; essential for viability; has similarity to E. coli S3 and rat S3 ribosomal proteins
381	31	2	1	1	3	2	2	4	2	1	1	12	GO:0000003=>reproduction=>ubi4p_canal ame: full=polyubiquitin contains: ame: full=ubiquitin flags: precursor GO:0002119=>nematode larval development=>ubi4p_canal ame: full=polyubiquitin contains: ame: full=ubiquitin flags: precursor GO:0005634=>nucleus=>ubi4p_canal ame: full=polyubiquitin contains: ame: full=ubiquitin flags: precursor GO:0005773=>vacuole=>ubi4p_canal ame: full=polyubiquitin conta…	IPR019955 (Ubiquitin supergroup)	Ubiquitin, becomes conjugated to proteins, marking them for selective degradation via the ubiquitin-26S proteasome system; essential for the cellular stress response; encoded as a polyubiquitin precursor comprised of 5 head-to-tail repeats
382	31	1	2	1	1	1	1	2	2	1	1	18	GO:0004802=>transketolase activity=>tkt_schpo ame: full=probable transketolase short=tk GO:0005975=>carbohydrate metabolic process=>tkt_schpo ame: full=probable transketolase short=tk GO:0009535=>chloroplast thylakoid membrane=>tkt_schpo ame: full=probable transketolase short=tk GO:0044237=>cellular metabolic process=>tkt_schpo ame: full=probable transketolase short=tk GO:0071704=>organic substan…	IPR005478 (Transketolase, bacterial-like IPR009014 (Transketolase, C-terminal/Pyruvate-ferredoxin oxidoreductase, domain II)	Transketolase, similar to Tkl1p; catalyzes conversion of xylulose-5-phosphate and ribose-5-phosphate to sedoheptulose-7-phosphate and glyceraldehyde-3-phosphate in the pentose phosphate pathway; needed for synthesis of aromatic amino acids Transketolase, similar to Tkl2p; catalyzes conversion of xylulose-5-phosphate and ribose-5-phosphate to sedoheptulose-7-phosphate and glyceraldehyde-3-phosphat…
383	31	1	1	1	1	1	1	2	3	1	1	18	GO:0003958=>NADPH-hemoprotein reductase activity=>ncpr_asptn ame: full=nadph--cytochrome p450 reductase short=cpr short=p450r GO:0005515=>protein binding=>ncpr_asptn ame: full=nadph--cytochrome p450 reductase short=cpr short=p450r GO:0006694=>steroid biosynthetic process=>ncpr_asptn ame: full=nadph--cytochrome p450 reductase short=cpr short=p450r GO:0009055=>electron carrier activity=>ncpr_asptn …	IPR001094 (Flavodoxin IPR023173 (NADPH-cytochrome p450 reductase, FAD-binding, alpha-helical domain-3)	NADP-cytochrome P450 reductase; involved in ergosterol biosynthesis; associated and coordinately regulated with Erg11p
384	31	1	2	1	1	1	1	2	2	1	1	18	GO:0000184=>nuclear-transcribed mRNA catabolic process, nonsense-mediated decay=>rs22_neucr ame: full=40s ribosomal protein s22 GO:0003723=>RNA binding=>rs22_neucr ame: full=40s ribosomal protein s22 GO:0003735=>structural constituent of ribosome=>rs22_neucr ame: full=40s ribosomal protein s22 GO:0005739=>mitochondrion=>rs22_neucr ame: full=40s ribosomal protein s22 GO:0006413=>translational init…	IPR000630 (Ribosomal protein S8)	Protein component of the small (40S) ribosomal subunit; nearly identical to Rps22Bp and has similarity to E. coli S8 and rat S15a ribosomal proteins Protein component of the small (40S) ribosomal subunit; nearly identical to Rps22Ap and has similarity to E. coli S8 and rat S15a ribosomal proteins
385	31	1	1	1	1	1	1	4	1	1	1	18	GO:0000184=>nuclear-transcribed mRNA catabolic process, nonsense-mediated decay=>rs20_xenla ame: full=40s ribosomal protein s20 ame: full=s22 GO:0001510=>RNA methylation=>rs20_xenla ame: full=40s ribosomal protein s20 ame: full=s22 GO:0003723=>RNA binding=>rs20_xenla ame: full=40s ribosomal protein s20 ame: full=s22 GO:0003735=>structural constituent of ribosome=>rs20_xenla ame: full=40s ribosoma…	IPR001848 (Ribosomal protein S10)	Protein component of the small (40S) ribosomal subunit; overproduction suppresses mutations affecting RNA polymerase III-dependent transcription; has similarity to E. coli S10 and rat S20 ribosomal proteins
386	31	1	2	1	1	1	1	2	2	1	1	18	GO:0000159=>protein phosphatase type 2A complex=>pp2a1_neucr ame: full=serine threonine-protein phosphatase pp2a catalytic subunit GO:0000184=>nuclear-transcribed mRNA catabolic process, nonsense-mediated decay=>pp2a1_neucr ame: full=serine threonine-protein phosphatase pp2a catalytic subunit GO:0000188=>inactivation of MAPK activity=>pp2a1_neucr ame: full=serine threonine-protein phosphatase pp2…	IPR004843 (Metallo-dependent phosphatase)	Catalytic subunit of protein phosphatase 2A (PP2A), functionally redundant with Pph22p; methylated at C terminus; forms alternate complexes with several regulatory subunits; involved in signal transduction and regulation of mitosis Catalytic subunit of protein phosphatase 2A (PP2A), functionally redundant with Pph21p; methylated at C terminus; forms alternate complexes with several regulatory sub…
387	31	1	2	1	1	1	1	4	1	1	1	17	GO:0000289=>nuclear-transcribed mRNA poly(A) tail shortening=>not3_schpo ame: full=general negative regulator of transcription subunit 3 GO:0000932=>cytoplasmic mRNA processing body=>not3_schpo ame: full=general negative regulator of transcription subunit 3 GO:0005515=>protein binding=>not3_schpo ame: full=general negative regulator of transcription subunit 3 GO:0005829=>cytosol=>not3_schpo ame: …	IPR012270 (CCR4-NOT complex, subunit 3/ 5)	Subunit of the CCR4-NOT complex, which is a global transcriptional regulator with roles in transcription initiation and elongation and in mRNA degradation Subunit of the CCR4-NOT complex, which is a global transcriptional regulator with roles in transcription initiation and elongation and in mRNA degradation
388	31	0	0	0	0	0	0	0	0	0	0	31
389	31	0	2	1	1	1	1	4	1	1	1	18			Protein component of the small (40S) ribosomal subunit, required for assembly and maturation of pre-40 S particles; mutations in human RPS19 are associated with Diamond Blackfan anemia; nearly identical to Rps19Ap Protein component of the small (40S) ribosomal subunit, required for assembly and maturation of pre-40 S particles; mutations in human RPS19 are associated with Diamond Blackfan anemia;…
390	31	31	0	0	0	0	0	0	0	0	0	0		IPR014002 (Tudor-like, plant)
391	30	2	2	1	1	1	1	1	1	2	1	17	GO:0000082=>G1/S transition of mitotic cell cycle=>tor2_schpo ame: full=phosphatidylinositol 3-kinase tor2 short=pi3-kinase tor2 short=pi3k tor2 short= ns-3-kinase tor2 GO:0001030=>RNA polymerase III type 1 promoter DNA binding=>tor2_schpo ame: full=phosphatidylinositol 3-kinase tor2 short=pi3-kinase tor2 short=pi3k tor2 short= ns-3-kinase tor2 GO:0001031=>RNA polymerase III type 2 promoter DNA b…	IPR003152 (PIK-related kinase, FATC IPR009076 (FKBP12-rapamycin-associated protein, FKBP12-rapamycin-binding IPR009076 (FKBP12-rapamycin-associated protein, FKBP12-rapamycin-binding	PIK-related protein kinase and rapamycin target; subunit of TORC1, a complex that controls growth in response to nutrients by regulating translation, transcription, ribosome biogenesis, nutrient transport and autophagy; involved in meiosis PIK-related protein kinase and rapamycin target; subunit of TORC1, a complex that regulates growth in response to nutrients and TORC2, a complex that regulates…
392	30	3	1	1	1	2	1	1	1	0	1	18	GO:0000139=>Golgi membrane=>mns1_canal ame: full=mannosyl-oligosaccharide -alpha-mannosidase ame: full=man -alpha-mannosidase GO:0004571=>mannosyl-oligosaccharide 1,2-alpha-mannosidase activity=>mns1_canal ame: full=mannosyl-oligosaccharide -alpha-mannosidase ame: full=man -alpha-mannosidase GO:0005509=>calcium ion binding=>mns1_canal ame: full=mannosyl-oligosaccharide -alpha-mannosidase ame: ful…	IPR001382 (Glycoside hydrolase, family 47)	Alpha-1,2-mannosidase involved in ER quality control; catalyzes the removal of one mannose residue from Man9GlcNAc to produce a single isomer of Man8GlcNAc in N-linked oligosaccharide biosynthesis; integral to ER membrane
393	30	30	0	0	0	0	0	0	0	0	0	0	GO:0005515=>protein binding=>lrrx1_dicdi ame: full= leucine-rich repeat-containing protein ddb_g0290503 GO:0007275=>multicellular organismal development=>lrrx1_dicdi ame: full= leucine-rich repeat-containing protein ddb_g0290503 GO:0009653=>anatomical structure morphogenesis=>lrrx1_dicdi ame: full= leucine-rich repeat-containing protein ddb_g0290503 GO:0015630=>microtubule cytoskeleton=>lrrx1_dic…	IPR001878 (Zinc finger, CCHC-type)
394	30	30	0	0	0	0	0	0	0	0	0	0	GO:0005488=>binding=>yg31b_yeast ame: full=transposon ty3-g gag-pol polyprotein ame: full=gag3-pol3 ame: full=transposon ty3-1 tya-tyb polyprotein contains: ame: full=capsid protein short=ca ame: full=p24 contains: ame: full=spacer peptide p3 contains: ame: full=nucleocapsid protein p11 short=nc contains: ame: full=ty3 protease short=pr ame: full=p16 contains: ame: full=spacer peptide j contains:…	IPR012337 (Ribonuclease H-like)
395	30	30	0	0	0	0	0	0	0	0	0	0	GO:0005488=>binding=>pol4_drome ame: full=retrovirus-related pol polyprotein from transposon 412 includes: ame: full=protease includes: ame: full=reverse transcriptase includes: ame: full=endonuclease GO:0009987=>cellular process=>pol4_drome ame: full=retrovirus-related pol polyprotein from transposon 412 includes: ame: full=protease includes: ame: full=reverse transcriptase includes: ame: full=e…	IPR013641 (Chromatin associated protein KTI12) IPR012337 (Ribonuclease H-like IPR015416 (Zinc finger, H2C2-type, histone UAS binding) IPR018094 (Thymidylate kinase) IPR011579 (ATPase domain, prokaryote) IPR002624 (Deoxynucleoside kinase) IPR010488 (Zeta toxin, P-loop nucleoside triphosphate hydrolase)
396	30	4	1	3	2	3	1	7	6	0	3	0	GO:0005488=>binding=>ya2g_schpo ame: full=uncharacterized protein GO:0005768=>endosome=>ya2g_schpo ame: full=uncharacterized protein GO:0005794=>Golgi apparatus=>ya2g_schpo ame: full=uncharacterized protein GO:0006952=>defense response=>ya2g_schpo ame: full=uncharacterized protein GO:0007275=>multicellular organismal development=>ya2g_schpo ame: full=uncharacterized protein GO:0009605=>response t…	IPR001683 (Phox homologous domain IPR015679 (Phospholipase D) IPR015679 (Phospholipase D)	Phospholipase D, catalyzes the hydrolysis of phosphatidylcholine, producing choline and phosphatidic acid; involved in Sec14p-independent secretion; required for meiosis and spore formation; differently regulated in secretion and meiosis
397	30	2	1	1	1	1	1	2	1	1	1	18	GO:0000084=>S phase of mitotic cell cycle=>prs10_human ame: full=26s protease regulatory subunit 10b ame: full=26s proteasome aaa-atpase subunit rpt4 ame: full=proteasome 26s subunit atpase 6 ame: full=proteasome subunit p42 GO:0000209=>protein polyubiquitination=>prs10_human ame: full=26s protease regulatory subunit 10b ame: full=26s proteasome aaa-atpase subunit rpt4 ame: full=proteasome 26s su…	IPR003593 (ATPase, AAA+ type, core IPR005937 (26S proteasome subunit P45)	One of six ATPases of the 19S regulatory particle of the 26S proteasome involved in degradation of ubiquitinated substrates; contributes preferentially to ERAD; required for spindle pole body duplication; mainly nuclear localization
398	30	0	0	0	0	30	0	0	0	0	0	0
399	30	0	0	0	0	30	0	0	0	0	0	0
400	30	1	1	1	1	3	1	1	1	1	1	18	GO:0000278=>mitotic cell cycle=>orc5_mouse ame: full=origin recognition complex subunit 5 GO:0005634=>nucleus=>orc5_mouse ame: full=origin recognition complex subunit 5 GO:0006260=>DNA replication=>orc5_mouse ame: full=origin recognition complex subunit 5 GO:0022403=>cell cycle phase=>orc5_mouse ame: full=origin recognition complex subunit 5 GO:0044446=>intracellular organelle part=>orc5_mouse am…	IPR020796 (Origin recognition complex, subunit 5)	Subunit of the origin recognition complex, which directs DNA replication by binding to replication origins and is also involved in transcriptional silencing
401	30	0	0	0	0	30	0	0	0	0	0	0
402	30	0	0	0	0	30	0	0	0	0	0	0
403	30	0	0	0	0	30	0	0	0	0	0	0
404	30	1	1	1	1	2	1	1	1	1	2	18	GO:0000413=>protein peptidyl-prolyl isomerization=>ppif_mouse ame: full=peptidyl-prolyl cis-trans isomerase mitochondrial short=ppiase f ame: full=cyclophilin f ame: full=rotamase f flags: precursor GO:0002576=>platelet degranulation=>ppif_mouse ame: full=peptidyl-prolyl cis-trans isomerase mitochondrial short=ppiase f ame: full=cyclophilin f ame: full=rotamase f flags: precursor GO:0003755=>pept…	IPR015891 (Cyclophilin-like)	Cytoplasmic peptidyl-prolyl cis-trans isomerase (cyclophilin), catalyzes the cis-trans isomerization of peptide bonds N-terminal to proline residues; binds the drug cyclosporin A
405	30	0	0	0	0	30	0	0	0	0	0	0
406	30	1	2	2	2	2	2	3	2	2	2	10	GO:0003899=>DNA-directed RNA polymerase activity=>rpc1_schpo ame: full=dna-directed rna polymerase iii subunit rpc1 short=rna polymerase iii subunit c1 ame: full=dna-directed rna polymerase iii largest subunit ame: full=rpc158 GO:0005515=>protein binding=>rpc1_schpo ame: full=dna-directed rna polymerase iii subunit rpc1 short=rna polymerase iii subunit c1 ame: full=dna-directed rna polymerase iii…	IPR015700 (DNA-directed RNA polymerase III largest subunit)	RNA polymerase II largest subunit B220, part of central core; phosphorylation of C-terminal heptapeptide repeat domain regulates association with transcription and splicing factors; similar to bacterial beta-prime RNA polymerase III largest subunit C160, part of core enzyme; similar to bacterial beta-prime subunit and to RPA190 and RPO21
407	30	0	0	0	0	30	0	0	0	0	0	0
408	30	1	1	1	1	1	1	3	1	1	1	18	GO:0000003=>reproduction=>copg1_human ame: full=coatomer subunit gamma-1 ame: full=gamma-1-coat protein short=gamma-1-cop GO:0000910=>cytokinesis=>copg1_human ame: full=coatomer subunit gamma-1 ame: full=gamma-1-coat protein short=gamma-1-cop GO:0002119=>nematode larval development=>copg1_human ame: full=coatomer subunit gamma-1 ame: full=gamma-1-coat protein short=gamma-1-cop GO:0005634=>nucleus…	IPR009028 (Clathrin/coatomer adaptor, adaptin-like, appendage, C-terminal subdomain IPR013041 (Clathrin/coatomer adaptor, adaptin-like, appendage, Ig-like subdomain	Gamma subunit of coatomer, a heptameric protein complex that together with Arf1p forms the COPI coat; involved in ER to Golgi transport of selective cargo
409	30	1	1	1	1	1	1	2	2	1	1	18	GO:0000910=>cytokinesis=>snaa_dicdi ame: full=alpha-soluble nsf attachment protein short=snap-alpha ame: full=n-ethylmaleimide-sensitive factor attachment protein alpha GO:0001745=>compound eye morphogenesis=>snaa_dicdi ame: full=alpha-soluble nsf attachment protein short=snap-alpha ame: full=n-ethylmaleimide-sensitive factor attachment protein alpha GO:0005774=>vacuolar membrane=>snaa_dicdi ame:…	IPR000744 (NSF attachment protein)	Peripheral membrane protein required for vesicular transport between ER and Golgi, the 'priming' step in homotypic vacuole fusion, and autophagy; stimulates the ATPase activity of Sec18p; has similarity to mammalian alpha-SNAP
410	30	1	3	2	2	2	2	2	2	2	2	10	GO:0001701=>in utero embryonic development=>zhf1_schpo ame: full=zinc homeostasis factor 1 GO:0005385=>zinc ion transmembrane transporter activity=>zhf1_schpo ame: full=zinc homeostasis factor 1 GO:0005488=>binding=>zhf1_schpo ame: full=zinc homeostasis factor 1 GO:0006874=>cellular calcium ion homeostasis=>zhf1_schpo ame: full=zinc homeostasis factor 1 GO:0010033=>response to organic substance=>…	IPR002524 (Cation efflux protein)	Vacuolar membrane zinc transporter, transports zinc from the cytosol into the vacuole for storage; also has a role in resistance to zinc shock resulting from a sudden influx of zinc into the cytoplasm Vacuolar transporter that mediates zinc transport into the vacuole; overexpression confers resistance to cobalt and rhodium Member of the cation diffusion facilitator family, localizes to the endopl…
411	30	1	2	1	1	1	1	1	1	2	1	18	GO:0000166=>nucleotide binding=>myo1_copc7 ame: full=myosin-1 ame: full=class i unconventional myosin ame: full=type i myosin GO:0005737=>cytoplasm=>myo1_copc7 ame: full=myosin-1 ame: full=class i unconventional myosin ame: full=type i myosin GO:0015629=>actin cytoskeleton=>myo1_copc7 ame: full=myosin-1 ame: full=class i unconventional myosin ame: full=type i myosin GO:0016787=>hydrolase activity…	IPR001452 (Src homology-3 domain IPR010926 (Myosin tail 2)	One of two type I myosins; localizes to actin cortical patches; deletion of MYO3 has little effect on growth, but myo3 myo5 double deletion causes severe defects in growth and actin cytoskeleton organization One of two type I myosins; contains proline-rich tail homology 2 (TH2) and SH3 domains; MYO5 deletion has little effect on growth, but myo3 myo5 double deletion causes severe defects in growt…
412	30	1	1	1	1	1	1	2	3	2	1	16	GO:0000060=>protein import into nucleus, translocation=>tnpo1_bovin ame: full=transportin-1 ame: full=importin beta-2 ame: full=karyopherin beta-2 GO:0005515=>protein binding=>tnpo1_bovin ame: full=transportin-1 ame: full=importin beta-2 ame: full=karyopherin beta-2 GO:0005829=>cytosol=>tnpo1_bovin ame: full=transportin-1 ame: full=importin beta-2 ame: full=karyopherin beta-2 GO:0008139=>nuclear …	IPR016024 (Armadillo-type fold)	Transportin or cytosolic karyopherin beta 2; functions in the rg-nuclear localization signal-mediated nuclear import/reimport of mRNA-binding proteins Nab2p and Hrp1p; regulates asymmetric protein synthesis in daughter cells during mitosis
413	30	1	1	1	1	1	1	2	2	1	1	18	GO:0005093=>Rab GDP-dissociation inhibitor activity=>gdi1_schpo ame: full=probable secretory pathway gdp dissociation inhibitor 1 GO:0005097=>Rab GTPase activator activity=>gdi1_schpo ame: full=probable secretory pathway gdp dissociation inhibitor 1 GO:0005794=>Golgi apparatus=>gdi1_schpo ame: full=probable secretory pathway gdp dissociation inhibitor 1 GO:0005829=>cytosol=>gdi1_schpo ame: full=p…	IPR018203 (GDP dissociation inhibitor)	GDP dissociation inhibitor, regulates vesicle traffic in secretory pathways by regulating the dissociation of GDP from the Sec4/Ypt/rab family of GTP binding proteins
414	30	1	1	1	1	1	1	1	1	1	1	20	GO:0000166=>nucleotide binding=>sya_schpo ame: full=alanine--trna ligase ame: full=alanyl-trna synthetase short= GO:0001942=>hair follicle development=>sya_schpo ame: full=alanine--trna ligase ame: full=alanyl-trna synthetase short= GO:0002119=>nematode larval development=>sya_schpo ame: full=alanine--trna ligase ame: full=alanyl-trna synthetase short= GO:0002161=>aminoacyl-tRNA editing activity=…	IPR002318 (Alanyl-tRNA synthetase, class IIc)	Cytoplasmic and mitochondrial alanyl-tRNA synthetase, required for protein synthesis; point mutation (cdc64-1 allele) causes cell cycle arrest at G1; lethality of null mutation is functionally complemented by human homolog
415	30	1	1	1	1	1	1	2	2	1	1	18	GO:0000139=>Golgi membrane=>sec23_ustma ame: full=protein transport protein sec23 GO:0002474=>antigen processing and presentation of peptide antigen via MHC class I=>sec23_ustma ame: full=protein transport protein sec23 GO:0005515=>protein binding=>sec23_ustma ame: full=protein transport protein sec23 GO:0005789=>endoplasmic reticulum membrane=>sec23_ustma ame: full=protein transport protein sec2…	IPR006895 (Zinc finger, Sec23/Sec24-type IPR006896 (Sec23/Sec24, trunk domain	GTPase-activating protein, stimulates the GTPase activity of Sar1p; component of the Sec23p-Sec24p heterodimer of the COPII vesicle coat, involved in ER to Golgi transport
416	30	1	1	1	2	1	1	2	2	1	1	17	GO:0006562=>proline catabolic process=>prod_caeel ame: full=proline dehydrogenase mitochondrial ame: full=proline oxidase flags: precursor GO:0006950=>response to stress=>prod_caeel ame: full=proline dehydrogenase mitochondrial ame: full=proline oxidase flags: precursor GO:0007165=>signal transduction=>prod_caeel ame: full=proline dehydrogenase mitochondrial ame: full=proline oxidase flags: precu…	IPR011992 (EF-hand-like domain IPR015659 (Proline oxidase)	Proline oxidase, nuclear-encoded mitochondrial protein involved in utilization of proline as sole nitrogen source; PUT1 transcription is induced by Put3p in the presence of proline and the absence of a preferred nitrogen source
417	30	2	1	2	2	1	2	1	1	2	2	14	GO:0000166=>nucleotide binding=>fmo5_rat ame: full=dimethylaniline monooxygenase 5 ame: full=dimethylaniline oxidase 5 ame: full=hepatic flavin-containing monooxygenase 5 short=fmo 5 GO:0005783=>endoplasmic reticulum=>fmo5_rat ame: full=dimethylaniline monooxygenase 5 ame: full=dimethylaniline oxidase 5 ame: full=hepatic flavin-containing monooxygenase 5 short=fmo 5 GO:0016709=>oxidoreductase act…	IPR020946 (Flavin-containing monooxygenase-like) IPR002013 (Synaptojanin, N-terminal)	Phosphatidylinositol 3,5-bisphosphate (PtdIns[3,5]P) phosphatase; required for efficient mating and response to osmotic shock; physically associates with and regulated by Vac14p; contains a SAC1-like domain
418	30	0	1	1	0	1	0	1	1	2	0	23			Putative protein of unknown function; green fluorescent protein (GFP)-fusion protein localizes to the cytoplasm
419	30	0	1	3	1	1	1	1	1	1	2	18			D-lactate dehydrogenase, oxidizes D-lactate to pyruvate, transcription is heme-dependent, repressed by glucose, and derepressed in ethanol or lactate; located in the mitochondrial inner membrane
420	30	1	1	1	1	1	1	2	1	1	1	19	GO:0004775=>succinate-CoA ligase (ADP-forming) activity=>sucb_neucr ame: full=probable succinyl- ligase subunit mitochondrial ame: full=succinyl- synthetase beta chain short=scs-beta flags: precursor GO:0004776=>succinate-CoA ligase (GDP-forming) activity=>sucb_neucr ame: full=probable succinyl- ligase subunit mitochondrial ame: full=succinyl- synthetase beta chain short=scs-beta flags: precursor…	IPR005809 (Succinyl-CoA synthetase, beta subunit IPR016102 (Succinyl-CoA synthetase-like)	Beta subunit of succinyl-CoA ligase, which is a mitochondrial enzyme of the TCA cycle that catalyzes the nucleotide-dependent conversion of succinyl-CoA to succinate
421	30	1	1	1	1	1	1	1	1	1	1	20	GO:0000085=>G2 phase of mitotic cell cycle=>csn5b_arath ame: full=cop9 signalosome complex subunit 5b short=signalosome subunit 5b ame: full=jun activation domain-binding homolog 1 GO:0000910=>cytokinesis=>csn5b_arath ame: full=cop9 signalosome complex subunit 5b short=signalosome subunit 5b ame: full=jun activation domain-binding homolog 1 GO:0001751=>compound eye photoreceptor cell differentiat…	IPR000555 (Mov34/MPN/PAD-1)	Catalytic subunit of the COP9 signalosome (CSN) complex that acts as an isopeptidase in cleaving the ubiquitin-like protein Nedd8 from SCF ubiquitin ligases; metalloendopeptidase involved in the adaptation to pheromone signaling
422	30	1	2	1	1	1	1	2	1	1	1	18	GO:0000023=>maltose metabolic process=>pgm_emeni ame: full=phosphoglucomutase short=pgm ame: full=glucose phosphomutase GO:0004614=>phosphoglucomutase activity=>pgm_emeni ame: full=phosphoglucomutase short=pgm ame: full=glucose phosphomutase GO:0004619=>phosphoglycerate mutase activity=>pgm_emeni ame: full=phosphoglucomutase short=pgm ame: full=glucose phosphomutase GO:0005634=>nucleus=>pgm_emeni…	IPR005841 (Alpha-D-phosphohexomutase)	Phosphoglucomutase, minor isoform; catalyzes the conversion from glucose-1-phosphate to glucose-6-phosphate, which is a key step in hexose metabolism Phosphoglucomutase, catalyzes the conversion from glucose-1-phosphate to glucose-6-phosphate, which is a key step in hexose metabolism; functions as the acceptor for a Glc-phosphotransferase
423	30	1	2	1	1	1	1	2	1	1	1	18	GO:0001703=>gastrulation with mouth forming first=>pdi_humin ame: full=protein disulfide-isomerase short=pdi flags: precursor GO:0002119=>nematode larval development=>pdi_humin ame: full=protein disulfide-isomerase short=pdi flags: precursor GO:0003756=>protein disulfide isomerase activity=>pdi_humin ame: full=protein disulfide-isomerase short=pdi flags: precursor GO:0003810=>protein-glutamine ga…	IPR005746 (Thioredoxin IPR005792 (Protein disulphide isomerase	Protein disulfide isomerase; multifunctional protein resident in the endoplasmic reticulum lumen, essential for the formation of disulfide bonds in secretory and cell-surface proteins, unscrambles non-native disulfide bonds; forms a complex with Mnl1p that has exomannosidase activity, processing unfolded protein-bound Man8GlcNAc2 oligosaccharides to Man7GlcNAc2 which promotes degradation in the u…
424	30	1	2	2	1	1	1	3	2	1	2	14	GO:0006811=>ion transport=>avt3_schpo ame: full=vacuolar amino acid transporter 3 GO:0015175=>neutral amino acid transmembrane transporter activity=>avt3_schpo ame: full=vacuolar amino acid transporter 3 GO:0015179=>L-amino acid transmembrane transporter activity=>avt3_schpo ame: full=vacuolar amino acid transporter 3 GO:0015291=>secondary active transmembrane transporter activity=>avt3_schpo ame…	IPR013057 (Amino acid transporter, transmembrane)	Vacuolar transporter, exports large neutral amino acids from the vacuole; member of a family of seven S. cerevisiae genes (AVT1-7) related to vesicular GABA-glycine transporters Vacuolar transporter, exports large neutral amino acids from the vacuole; member of a family of seven S. cerevisiae genes (AVT1-7) related to vesicular GABA-glycine transporters
425	30	1	1	1	1	1	1	2	2	1	1	18	GO:0000084=>S phase of mitotic cell cycle=>prs4_drome ame: full=26s protease regulatory subunit 4 short=p26s4 GO:0000209=>protein polyubiquitination=>prs4_drome ame: full=26s protease regulatory subunit 4 short=p26s4 GO:0000216=>M/G1 transition of mitotic cell cycle=>prs4_drome ame: full=26s protease regulatory subunit 4 short=p26s4 GO:0000271=>polysaccharide biosynthetic process=>prs4_drome ame:…	IPR003593 (ATPase, AAA+ type, core IPR005937 (26S proteasome subunit P45)	One of six ATPases of the 19S regulatory particle of the 26S proteasome involved in the degradation of ubiquitinated substrates; required for normal peptide hydrolysis by the core 20S particle
426	30	1	3	1	1	1	1	1	1	1	1	18	GO:0016846=>carbon-sulfur lyase activity=>met7_schpo ame: full=probable cystathionine gamma-synthase ame: full=o-succinylhomoserine -lyase)	IPR015424 (Pyridoxal phosphate-dependent transferase, major domain)	Putative protein of unknown function with similarity to Str2p, which is a cystathionine gamma-synthase important in sulfur metabolism; YLL058W is not an essential gene Cystathionine gamma-synthase, converts cysteine into cystathionine Putative protein predicted to have carbon-sulfur lyase activity; transcriptionally regulated by Upc2p via an upstream sterol response element; green fluorescent pro…
427	30	1	1	1	1	1	1	1	1	1	1	20	GO:0004648=>O-phospho-L-serine:2-oxoglutarate aminotransferase activity=>serc_pseu2 ame: full=phosphoserine aminotransferase ame: full=phosphohydroxythreonine aminotransferase short=psat GO:0005829=>cytosol=>serc_pseu2 ame: full=phosphoserine aminotransferase ame: full=phosphohydroxythreonine aminotransferase short=psat GO:0006564=>L-serine biosynthetic process=>serc_pseu2 ame: full=phosphoserine…	IPR015424 (Pyridoxal phosphate-dependent transferase, major domain IPR022278 (Phosphoserine aminotransferase)	3-phosphoserine aminotransferase, catalyzes the formation of phosphoserine from 3-phosphohydroxypyruvate, required for serine and glycine biosynthesis; regulated by the general control of amino acid biosynthesis mediated by Gcn4p
428	30	1	1	1	1	1	0	2	2	1	1	19	GO:0005488=>binding=>yme1_schpo ame: full=atp-dependent zinc metalloprotease yme1 homolog GO:0005743=>mitochondrial inner membrane=>yme1_schpo ame: full=atp-dependent zinc metalloprotease yme1 homolog GO:0006515=>misfolded or incompletely synthesized protein catabolic process=>yme1_schpo ame: full=atp-dependent zinc metalloprotease yme1 homolog GO:0007005=>mitochondrion organization=>yme1_schpo a…	IPR003593 (ATPase, AAA+ type, core IPR005936 (Peptidase M41, FtsH)	Catalytic subunit of the mitochondrial inner membrane i-AAA protease complex, which is responsible for degradation of unfolded or misfolded mitochondrial gene products; mutation causes an elevated rate of mitochondrial turnover
429	30	1	2	1	1	1	1	3	3	1	1	15	GO:0000184=>nuclear-transcribed mRNA catabolic process, nonsense-mediated decay=>rs26_neucr ame: full=40s ribosomal protein s26e ame: full= kda ribosomal protein ame: full=crp5 GO:0002119=>nematode larval development=>rs26_neucr ame: full=40s ribosomal protein s26e ame: full= kda ribosomal protein ame: full=crp5 GO:0003729=>mRNA binding=>rs26_neucr ame: full=40s ribosomal protein s26e ame: full= …	IPR000892 (Ribosomal protein S26e)	Protein component of the small (40S) ribosomal subunit; nearly identical to Rps26Ap and has similarity to rat S26 ribosomal protein Protein component of the small (40S) ribosomal subunit; nearly identical to Rps26Bp and has similarity to rat S26 ribosomal protein
430	30	1	2	1	1	1	1	1	2	1	1	18	GO:0001503=>ossification=>vph1_neucr ame: full=v-type proton atpase subunit a short=v-atpase a subunit ame: full=vacuolar atpase 98 kda subunit ame: full=vacuolar proton pump a subunit ame: full=vacuolar proton translocating atpase subunit a GO:0005730=>nucleolus=>vph1_neucr ame: full=v-type proton atpase subunit a short=v-atpase a subunit ame: full=vacuolar atpase 98 kda subunit ame: full=vacuol…	IPR002490 (ATPase, V0/A0 complex, 116kDa subunit)	Subunit a of the vacuolar-ATPase V0 domain, one of two isoforms (Stv1p and Vph1p); Stv1p is located in V-ATPase complexes of the Golgi and endosomes while Vph1p is located in V-ATPase complexes of the vacuole Subunit a of vacuolar-ATPase V0 domain, one of two isoforms (Vph1p and Stv1p); Vph1p is located in V-ATPase complexes of the vacuole while Stv1p is located in V-ATPase complexes of the Golgi…
431	30	0	1	1	1	1	1	3	2	1	1	18			Ubiquinol-cytochrome-c reductase, a Rieske iron-sulfur protein of the mitochondrial cytochrome bc1 complex; transfers electrons from ubiquinol to cytochrome c1 during respiration
432	30	1	1	1	1	1	1	5	2	0	1	16		IPR015797 (NUDIX hydrolase domain-like)	Polyphosphate phosphatase; hydrolyzes diphosphorylated inositol polyphosphates and diadenosine polyphosphates; has high specificity for diadenosine hexa- and pentaphosphates; exhibits endopolyphosphatase activity with a high affinity for polyphosphates, an activity also observed for its human DIPP homologs; member of the MutT family of nucleotide hydrolases
433	30	2	1	2	2	3	2	7	2	3	2	4	GO:0000287=>magnesium ion binding=>svka_dicdi ame: full=serine threonine-protein kinase svka ame: full=severin kinase a GO:0001569=>patterning of blood vessels=>svka_dicdi ame: full=serine threonine-protein kinase svka ame: full=severin kinase a GO:0001841=>neural tube formation=>svka_dicdi ame: full=serine threonine-protein kinase svka ame: full=severin kinase a GO:0002011=>morphogenesis of an e…	IPR011009 (Protein kinase-like domain)	Putative protein serine/threonine kinase expressed at the end of meiosis and localized to the prospore membrane, required for correct localization of enzymes involved in spore wall synthesis
434	30	0	2	3	1	1	2	8	4	0	3	6			NADPH-dependent medium chain alcohol dehydrogenase with broad substrate specificity; member of the cinnamyl family of alcohol dehydrogenases; may be involved in fusel alcohol synthesis or in aldehyde tolerance NADPH-dependent medium chain alcohol dehydrogenase with broad substrate specificity; member of the cinnamyl family of alcohol dehydrogenases; may be involved in fusel alcohol synthesis or i…
435	30	1	1	1	1	1	1	1	1	1	1	20	GO:0005515=>protein binding=>yb89_schpo ame: full=uncharacterized abc transporter atp-binding protein GO:0005524=>ATP binding=>yb89_schpo ame: full=uncharacterized abc transporter atp-binding protein GO:0005635=>nuclear envelope=>yb89_schpo ame: full=uncharacterized abc transporter atp-binding protein GO:0005654=>nucleoplasm=>yb89_schpo ame: full=uncharacterized abc transporter atp-binding protei…	IPR003593 (ATPase, AAA+ type, core)	Positive regulator of the Gcn2p kinase activity, forms a complex with Gcn1p; proposed to stimulate Gcn2p activation by an uncharged tRNA
436	30	0	0	2	1	0	1	0	1	0	1	24
437	30	1	0	2	2	1	2	2	1	5	1	13	GO:0000087=>M phase of mitotic cell cycle=>uso1_yeast ame: full=intracellular protein transport protein uso1 short=int-1 GO:0000226=>microtubule cytoskeleton organization=>uso1_yeast ame: full=intracellular protein transport protein uso1 short=int-1 GO:0000775=>chromosome, centromeric region=>uso1_yeast ame: full=intracellular protein transport protein uso1 short=int-1 GO:0005515=>protein binding…	IPR009053 (Prefoldin)
438	30	0	0	0	0	0	0	1	29	0	0	0
439	30	0	0	0	0	0	0	0	30	0	0	0
440	30	0	0	0	0	0	0	0	30	0	0	0
441	30	0	0	0	0	0	0	30	0	0	0	0
442	30	0	0	0	0	0	0	30	0	0	0	0
443	30	30	0	0	0	0	0	0	0	0	0	0	GO:0005634=>nucleus=>cgbp1_human ame: full=cgg triplet repeat-binding protein 1 short=cgg-binding protein 1 ame: full=20 kda cgg-binding protein ame: full=p20-cggbp dna-binding protein)	IPR008906 (HAT dimerisation IPR012337 (Ribonuclease H-like) IPR007021 (Domain of unknown function DUF659 IPR012337 (Ribonuclease H-like)
444	30	30	0	0	0	0	0	0	0	0	0	0
445	30	0	0	0	0	30	0	0	0	0	0	0
446	29	0	2	2	1	7	1	2	1	9	4	0			Protein of unknown function Protein of unknown function
447	29	0	0	1	1	1	1	0	0	10	5	10
448	29	0	0	0	0	0	0	0	0	2	0	27
449	29	29	0	0	0	0	0	0	0	0	0	0		IPR022364 (F-box domain, Skp2-like) IPR001810 (F-box domain, cyclin-like)
450	29	5	1	1	1	1	1	4	3	2	2	8	GO:0001666=>response to hypoxia=>lacs7_arath ame: full=long chain acyl- synthetase peroxisomal GO:0001676=>long-chain fatty acid metabolic process=>lacs7_arath ame: full=long chain acyl- synthetase peroxisomal GO:0004467=>long-chain fatty acid-CoA ligase activity=>lacs7_arath ame: full=long chain acyl- synthetase peroxisomal GO:0005634=>nucleus=>lacs7_arath ame: full=long chain acyl- synthetase p…	IPR000873 (AMP-dependent synthetase/ligase)	Medium chain fatty acyl-CoA synthetase, activates imported fatty acids; accepts a wide range of fatty acid chain lengths with a preference for medium chains, C9:0-C13:0; localized to the peroxisome
451	29	4	3	2	3	2	1	2	4	2	2	4	GO:0005765=>lysosomal membrane=>laat1_caeel ame: full=lysosomal amino acid transporter 1 GO:0015181=>arginine transmembrane transporter activity=>laat1_caeel ame: full=lysosomal amino acid transporter 1 GO:0015189=>L-lysine transmembrane transporter activity=>laat1_caeel ame: full=lysosomal amino acid transporter 1 GO:0015809=>arginine transport=>laat1_caeel ame: full=lysosomal amino acid transpo…	IPR006603 (Cystinosin/ERS1p repeat)	Protein of unknown function; mutant produces large lipid droplets, is resistant to fluconazole, has decreased levels of rDNA transcription, growth defects on minimal media, and suppresses cdc13-1; detected in highly purified mitochondria; similar to a G-protein coupled receptor from S. pombe Putative protein of unknown function; predicted to contain six transmembrane domains and is 58% similar to…
452	29	24	0	2	0	1	0	0	0	0	0	2	GO:0004686=>elongation factor-2 kinase activity=>vwka_dicdi ame: full=alpha-protein kinase vwka ame: full=von willebrand factor a alpha-kinase short=vwf kinase GO:0005261=>cation channel activity=>vwka_dicdi ame: full=alpha-protein kinase vwka ame: full=von willebrand factor a alpha-kinase short=vwf kinase GO:0006816=>calcium ion transport=>vwka_dicdi ame: full=alpha-protein kinase vwka ame: full…	IPR011009 (Protein kinase-like domain) IPR002035 (von Willebrand factor, type A) IPR011009 (Protein kinase-like domain)
453	29	2	1	1	1	1	1	1	1	1	1	18	GO:0016020=>membrane=>tms1_yeast ame: full=membrane protein tms1 GO:0043231=>intracellular membrane-bounded organelle=>tms1_yeast ame: full=membrane protein tms1 GO:0044255=>cellular lipid metabolic process=>tms1_yeast ame: full=membrane protein tms1 GO:0044444=>cytoplasmic part=>tms1_yeast ame: full=membrane protein tms1 GO:0065007=>biological regulation=>tms1_yeast ame: full=membrane protein tm…	IPR005016 (TMS membrane protein/tumour differentially expressed protein)	Vacuolar membrane protein of unknown function that is conserved in mammals; predicted to contain eleven transmembrane helices; interacts with Pdr5p, a protein involved in multidrug resistance
454	29	2	0	1	1	1	1	5	4	0	1	13	GO:0000910=>cytokinesis=>kif1a_anoga ame: full=kinesin-like protein unc-104 GO:0001704=>formation of primary germ layer=>kif1a_anoga ame: full=kinesin-like protein unc-104 GO:0001919=>regulation of receptor recycling=>kif1a_anoga ame: full=kinesin-like protein unc-104 GO:0005547=>phosphatidylinositol-3,4,5-trisphosphate binding=>kif1a_anoga ame: full=kinesin-like protein unc-104 GO:0005634=>nucle…	IPR001752 (Kinesin, motor domain IPR008984 (SMAD/FHA domain
455	29	2	1	1	1	1	1	1	1	1	1	18	GO:0000287=>magnesium ion binding=>ndkb_rat ame: full=nucleoside diphosphate kinase b short=ndk b short=ndp kinase b ame: full=histidine protein kinase ndkb ame: full=p18 GO:0000977=>RNA polymerase II regulatory region sequence-specific DNA binding=>ndkb_rat ame: full=nucleoside diphosphate kinase b short=ndk b short=ndp kinase b ame: full=histidine protein kinase ndkb ame: full=p18 GO:0001726=>r…	IPR001564 (Nucleoside diphosphate kinase)	Nucleoside diphosphate kinase, catalyzes the transfer of gamma phosphates from nucleoside triphosphates, usually ATP, to nucleoside diphosphates by a mechanism that involves formation of an autophosphorylated enzyme intermediate
456	29	2	1	1	1	1	1	1	1	1	1	18	GO:0000096=>sulfur amino acid metabolic process=>sahh_schpo ame: full=adenosylhomocysteinase short= cyase ame: full=s-adenosyl-l-homocysteine hydrolase GO:0002119=>nematode larval development=>sahh_schpo ame: full=adenosylhomocysteinase short= cyase ame: full=s-adenosyl-l-homocysteine hydrolase GO:0004013=>adenosylhomocysteinase activity=>sahh_schpo ame: full=adenosylhomocysteinase short= cyase a…	IPR000043 (Adenosylhomocysteinase)	S-adenosyl-L-homocysteine hydrolase, catabolizes S-adenosyl-L-homocysteine which is formed after donation of the activated methyl group of S-adenosyl-L-methionine (AdoMet) to an acceptor
457	29	2	2	2	2	3	2	3	3	1	2	7	GO:0003994=>aconitate hydratase activity=>acon_dicdi ame: full=probable aconitate mitochondrial short=aconitase ame: full=citrate hydro-lyase flags: precursor GO:0005506=>iron ion binding=>acon_dicdi ame: full=probable aconitate mitochondrial short=aconitase ame: full=citrate hydro-lyase flags: precursor GO:0005634=>nucleus=>acon_dicdi ame: full=probable aconitate mitochondrial short=aconitase am…	IPR015937 (Aconitase/isopropylmalate dehydratase)	Putative mitochondrial aconitase isozyme; similarity to Aco1p, an aconitase required for the TCA cycle; expression induced during growth on glucose, by amino acid starvation via Gcn4p, and repressed on ethanol Aconitase, required for the tricarboxylic acid (TCA) cycle and also independently required for mitochondrial genome maintenance; phosphorylated; component of the mitochondrial nucleoid; mut…
458	29	3	2	2	2	2	2	4	3	1	2	6	GO:0001726=>ruffle=>vps21_yeast ame: full=vacuolar protein sorting-associated protein 21 ame: full=gtp-binding protein ypt51 ame: full=vacuolar protein-targeting protein 12 GO:0003677=>DNA binding=>vps21_yeast ame: full=vacuolar protein sorting-associated protein 21 ame: full=gtp-binding protein ypt51 ame: full=vacuolar protein-targeting protein 12 GO:0003700=>sequence-specific DNA binding transc…	IPR005225 (Small GTP-binding protein)	Rab family GTPase required for endocytic transport and for sorting of vacuolar hydrolases; localized in endocytic intermediates; detected in mitochondria; geranylgeranylation required for membrane association; mammalian Rab5 homolog Rab family GTPase, similar to Ypt51p and Ypt53p and to mammalian rab5; required for vacuolar protein sorting and endocytosis
459	29	2	1	1	1	1	1	1	1	1	1	18	GO:0005743=>mitochondrial inner membrane=>mcat_mouse ame: full=mitochondrial carnitine acylcarnitine carrier protein ame: full=carnitine acylcarnitine translocase short=cac short=mcac ame: full=solute carrier family 25 member 20 GO:0006853=>carnitine shuttle=>mcat_mouse ame: full=mitochondrial carnitine acylcarnitine carrier protein ame: full=carnitine acylcarnitine translocase short=cac short=mc…	IPR001993 (Mitochondrial substrate carrier)	Mitochondrial inner membrane carnitine transporter, required for carnitine-dependent transport of acetyl-CoA from peroxisomes to mitochondria during fatty acid beta-oxidation
460	29	2	1	1	1	1	1	1	1	1	1	18	GO:0000082=>G1/S transition of mitotic cell cycle=>mcm7_schpo ame: full=dna replication licensing factor mcm7 ame: full=minichromosome maintenance protein 7 GO:0000084=>S phase of mitotic cell cycle=>mcm7_schpo ame: full=dna replication licensing factor mcm7 ame: full=minichromosome maintenance protein 7 GO:0000216=>M/G1 transition of mitotic cell cycle=>mcm7_schpo ame: full=dna replication licen…	IPR001208 (DNA-dependent ATPase MCM IPR016027 (Nucleic acid-binding, OB-fold-like)	Component of the heterohexameric MCM2-7 complex, which primes origins of DNA replication in G1 and becomes an active ATP-dependent helicase that promotes DNA melting and elongation in S-phase; forms an Mcm4p-6p-7p subcomplex
461	29	1	1	1	1	2	1	1	1	1	1	18	GO:0000287=>magnesium ion binding=>pura1_lacbs ame: full=adenylosuccinate synthetase 1 short=ampsase 1 short= 1 ame: full=imp--aspartate ligase 1 GO:0004019=>adenylosuccinate synthase activity=>pura1_lacbs ame: full=adenylosuccinate synthetase 1 short=ampsase 1 short= 1 ame: full=imp--aspartate ligase 1 GO:0005525=>GTP binding=>pura1_lacbs ame: full=adenylosuccinate synthetase 1 short=ampsase 1 s…	IPR001114 (Adenylosuccinate synthetase)	Adenylosuccinate synthase, catalyzes the first step in synthesis of adenosine monophosphate from inosine 5'monophosphate during purine nucleotide biosynthesis; exhibits binding to single-stranded autonomously replicating (ARS) core sequence
462	29	0	0	0	0	29	0	0	0	0	0	0
463	29	0	0	0	0	29	0	0	0	0	0	0
464	29	1	0	1	1	3	1	1	1	1	1	18	GO:0005634=>nucleus=>cb018_human ame: full=transmembrane protein c2orf18 flags: precursor GO:0005764=>lysosome=>cb018_human ame: full=transmembrane protein c2orf18 flags: precursor GO:0016020=>membrane=>cb018_human ame: full=transmembrane protein c2orf18 flags: precursor GO:0044446=>intracellular organelle part=>cb018_human ame: full=transmembrane protein c2orf18 flags: precursor)	IPR007271 (Nucleotide-sugar transporter)
465	29	0	1	1	1	3	1	1	1	1	1	18			Lanosterol synthase, an essential enzyme that catalyzes the cyclization of squalene 2,3-epoxide, a step in ergosterol biosynthesis
466	29	1	1	1	1	2	1	1	3	1	1	16	GO:0000122=>negative regulation of transcription from RNA polymerase II promoter=>fuz7_ustma ame: full=dual specificity protein kinase fuz7 GO:0000186=>activation of MAPKK activity=>fuz7_ustma ame: full=dual specificity protein kinase fuz7 GO:0002755=>MyD88-dependent toll-like receptor signaling pathway=>fuz7_ustma ame: full=dual specificity protein kinase fuz7 GO:0004674=>protein serine/threonin…	IPR011009 (Protein kinase-like domain)	Signal transducing MAP kinase kinase involved in pheromone response, where it phosphorylates Fus3p, and in the pseudohyphal/invasive growth pathway, through phosphorylation of Kss1p; phosphorylated by Ste11p, degraded by ubiquitin pathway
467	29	1	2	1	1	1	1	2	2	1	1	16	GO:0003872=>6-phosphofructokinase activity=>k6pf_schpo ame: full=6-phosphofructokinase short=phosphofructokinase ame: full=6pf-1-k ame: full=phosphohexokinase GO:0005524=>ATP binding=>k6pf_schpo ame: full=6-phosphofructokinase short=phosphofructokinase ame: full=6pf-1-k ame: full=phosphohexokinase GO:0005945=>6-phosphofructokinase complex=>k6pf_schpo ame: full=6-phosphofructokinase short=phosphof…	IPR009161 (6-phosphofructokinase, eukaryotic type IPR022953 (Phosphofructokinase)	Alpha subunit of heterooctameric phosphofructokinase involved in glycolysis, indispensable for anaerobic growth, activated by fructose-2,6-bisphosphate and AMP, mutation inhibits glucose induction of cell cycle-related genes Beta subunit of heterooctameric phosphofructokinase involved in glycolysis, indispensable for anaerobic growth, activated by fructose-2,6-bisphosphate and AMP, mutation inhib…
468	29	1	1	1	1	1	1	2	1	1	1	18	GO:0000166=>nucleotide binding=>u2af2_mouse ame: full=splicing factor u2af 65 kda subunit ame: full=u2 auxiliary factor 65 kda subunit ame: full=u2 snrnp auxiliary factor large subunit GO:0000381=>regulation of alternative mRNA splicing, via spliceosome=>u2af2_mouse ame: full=splicing factor u2af 65 kda subunit ame: full=u2 auxiliary factor 65 kda subunit ame: full=u2 snrnp auxiliary factor large…	IPR006529 (U2 snRNP auxilliary factor, large subunit, splicing factor IPR012677 (Nucleotide-binding, alpha-beta plait)	Protein involved in early pre-mRNA splicing; component of the pre-mRNA-U1 snRNP complex, the commitment complex; interacts with Msl5p/BBP splicing factor and Sub2p; similar to metazoan splicing factor U2AF65
469	29	1	1	1	1	1	1	2	1	1	1	18	GO:0005524=>ATP binding=>tcph_schpo ame: full=probable t-complex protein 1 subunit eta short=tcp-1-eta ame: full=cct-eta GO:0005739=>mitochondrion=>tcph_schpo ame: full=probable t-complex protein 1 subunit eta short=tcp-1-eta ame: full=cct-eta GO:0005832=>chaperonin-containing T-complex=>tcph_schpo ame: full=probable t-complex protein 1 subunit eta short=tcp-1-eta ame: full=cct-eta GO:0005874=>mi…	IPR002423 (Chaperonin Cpn60/TCP-1)	Subunit of the cytosolic chaperonin Cct ring complex, related to Tcp1p, required for the assembly of actin and tubulins in vivo; mutant has increased aneuploidy tolerance
470	29	1	1	1	1	1	1	1	2	1	1	18	GO:0002119=>nematode larval development=>clh_mouse ame: full=clathrin heavy chain 1 GO:0004871=>signal transducer activity=>clh_mouse ame: full=clathrin heavy chain 1 GO:0005198=>structural molecule activity=>clh_mouse ame: full=clathrin heavy chain 1 GO:0005515=>protein binding=>clh_mouse ame: full=clathrin heavy chain 1 GO:0005739=>mitochondrion=>clh_mouse ame: full=clathrin heavy chain 1 GO:00…	IPR016341 (Clathrin, heavy chain)	Clathrin heavy chain, subunit of the major coat protein involved in intracellular protein transport and endocytosis; two heavy chains form the clathrin triskelion structural component; the light chain (CLC1) is thought to regulate function
471	29	1	2	1	1	1	1	1	1	1	1	18	GO:0006568=>tryptophan metabolic process=>trpg_phybl ame: full=anthranilate synthase component 2 ame: full=anthranilate synthase component ii includes: ame: full=glutamine amidotransferase includes: ame: full=indole-3-glycerol phosphate synthase short=igps includes: ame: full=n-(5 -phosphoribosyl)anthranilate isomerase short=prai GO:0009073=>aromatic amino acid family biosynthetic process=>trpg_p…	IPR001240 (N-(5'phosphoribosyl)anthranilate isomerase (PRAI) IPR006220 (Anthranilate synthase component II/delta crystallin	Bifunctional enzyme exhibiting both indole-3-glycerol-phosphate synthase and anthranilate synthase activities, forms multifunctional hetero-oligomeric anthranilate synthase:indole-3-glycerol phosphate synthase enzyme complex with Trp2p Nuclear type II J heat shock protein of the E. coli dnaJ family, contains a leucine zipper-like motif, binds to non-native substrates for presentation to Ssa3p, ma…
472	29	0	0	0	0	0	0	0	0	0	1	28
473	29	1	1	1	1	1	1	1	2	1	1	18	GO:0005488=>binding=>dus1l_human ame: full=trna-dihydrouridine(16 17) synthase -like ame: full=trna-dihydrouridine synthase 1-like GO:0005737=>cytoplasm=>dus1l_human ame: full=trna-dihydrouridine(16 17) synthase -like ame: full=trna-dihydrouridine synthase 1-like GO:0008152=>metabolic process=>dus1l_human ame: full=trna-dihydrouridine(16 17) synthase -like ame: full=trna-dihydrouridine synthase 1…	IPR013785 (Aldolase-type TIM barrel)	Dihydrouridine synthase, member of a widespread family of conserved proteins including Smm1p, Dus3p, and Dus4p; modifies pre-tRNA(Phe) at U17
474	29	1	1	1	1	1	1	2	1	1	1	18	GO:0003678=>DNA helicase activity=>ruvb1_human ame: full= -like 1 ame: full=49 kda tata box-binding protein-interacting protein short=49 kda tbp-interacting protein ame: full=54 kda erythrocyte cytosolic protein short=ecp-54 ame: full=ino80 complex subunit h ame: full=nuclear matrix protein 238 short=nmp 238 ame: full=pontin 52 ame: full=tip49a ame: full=tip60-associated protein 54-alpha short=ta…	IPR003593 (ATPase, AAA+ type, core IPR010339 (TIP49, C-terminal	Essential protein involved in transcription regulation; component of chromatin remodeling complexes; required for assembly and function of the INO80 complex; also referred to as pontin; member of the RUVB-like protein family
475	29	1	1	1	1	1	1	2	1	1	1	18	GO:0005515=>protein binding=>byst_mouse ame: full=bystin GO:0005730=>nucleolus=>byst_mouse ame: full=bystin GO:0007155=>cell adhesion=>byst_mouse ame: full=bystin GO:0007565=>female pregnancy=>byst_mouse ame: full=bystin)	IPR007955 (Bystin)	Protein associated with U3 and U14 snoRNAs, required for pre-rRNA processing and 40S ribosomal subunit synthesis; localized in the nucleus and concentrated in the nucleolus
476	29	1	0	1	2	1	1	1	2	1	1	18	GO:0005618=>cell wall=>acdsb_mouse ame: full=short branched chain specific acyl- mitochondrial short=sbcad ame: full=2-methyl branched chain acyl- dehydrogenase short=2-mebcad ame: full=2-methylbutyryl-coenzyme a dehydrogenase short=2-methylbutyryl- dehydrogenase flags: precursor GO:0005759=>mitochondrial matrix=>acdsb_mouse ame: full=short branched chain specific acyl- mitochondrial short=sbcad …	IPR009075 (Acyl-CoA dehydrogenase/oxidase C-terminal IPR009100 (Acyl-CoA dehydrogenase/oxidase)
477	29	1	1	1	1	1	1	2	1	1	1	18	GO:0001942=>hair follicle development=>erg26_schpo ame: full=sterol-4-alpha-carboxylate 3- decarboxylating GO:0005783=>endoplasmic reticulum=>erg26_schpo ame: full=sterol-4-alpha-carboxylate 3- decarboxylating GO:0005811=>lipid particle=>erg26_schpo ame: full=sterol-4-alpha-carboxylate 3- decarboxylating GO:0007224=>smoothened signaling pathway=>erg26_schpo ame: full=sterol-4-alpha-carboxylate 3-…	IPR016040 (NAD(P)-binding domain)	C-3 sterol dehydrogenase, catalyzes the second of three steps required to remove two C-4 methyl groups from an intermediate in ergosterol biosynthesis
478	29	1	1	1	1	1	1	1	1	1	1	19	GO:0000003=>reproduction=>psmd6_mouse ame: full=26s proteasome non-atpase regulatory subunit 6 ame: full=26s proteasome regulatory subunit rpn7 ame: full=26s proteasome regulatory subunit s10 ame: full=p42a GO:0000084=>S phase of mitotic cell cycle=>psmd6_mouse ame: full=26s proteasome non-atpase regulatory subunit 6 ame: full=26s proteasome regulatory subunit rpn7 ame: full=26s proteasome regula…	IPR000717 (Proteasome component (PCI) domain IPR011990 (Tetratricopeptide-like helical	Essential, non-ATPase regulatory subunit of the 26S proteasome, similar to another S. cerevisiae regulatory subunit, Rpn5p, as well as to mammalian proteasome subunits
479	29	1	1	1	1	1	1	2	1	1	1	18	GO:0005507=>copper ion binding=>etfa_caeel ame: full=probable electron transfer flavoprotein subunit mitochondrial short=alpha-etf flags: precursor GO:0005618=>cell wall=>etfa_caeel ame: full=probable electron transfer flavoprotein subunit mitochondrial short=alpha-etf flags: precursor GO:0005759=>mitochondrial matrix=>etfa_caeel ame: full=probable electron transfer flavoprotein subunit mitochond…	IPR001308 (Electron transfer flavoprotein, alpha subunit)	Putative ortholog of mammalian electron transfer flavoprotein complex subunit ETF-alpha; interacts with frataxin, Yfh1p; null mutant displays elevated frequency of mitochondrial genome loss; may have a role in oxidative stress response
480	29	1	1	1	1	0	0	1	1	0	1	22	GO:0000166=>nucleotide binding=>tyw1_arath ame: full=trna wybutosine-synthesizing protein 1 homolog GO:0003958=>NADPH-hemoprotein reductase activity=>tyw1_arath ame: full=trna wybutosine-synthesizing protein 1 homolog GO:0005515=>protein binding=>tyw1_arath ame: full=trna wybutosine-synthesizing protein 1 homolog GO:0005739=>mitochondrion=>tyw1_arath ame: full=trna wybutosine-synthesizing protein…	IPR001094 (Flavodoxin IPR007197 (Radical SAM	Protein required for the synthesis of wybutosine, a modified guanosine found at the 3'-position adjacent to the anticodon of phenylalanine tRNA which supports reading frame maintenance by stabilizing codon-anticodon interactions
481	29	1	1	1	1	1	1	2	1	1	1	18	GO:0000398=>mRNA splicing, via spliceosome=>rpab1_caebr ame: full=dna-directed rna polymerases and iii subunit rpabc1 short=rna polymerases and iii subunit abc1 ame: full=rpb5 homolog GO:0004672=>protein kinase activity=>rpab1_caebr ame: full=dna-directed rna polymerases and iii subunit rpabc1 short=rna polymerases and iii subunit abc1 ame: full=rpb5 homolog GO:0005515=>protein binding=>rpab1_cae…	IPR014381 (DNA-directed RNA polymerase, RPB5 subunit)	RNA polymerase subunit ABC27, common to RNA polymerases I, II, and III; contacts DNA and affects transactivation
482	29	1	1	1	1	1	1	1	2	1	1	18	GO:0000139=>Golgi membrane=>emp24_schpo ame: full=endosomal protein p24b flags: precursor GO:0001843=>neural tube closure=>emp24_schpo ame: full=endosomal protein p24b flags: precursor GO:0001892=>embryonic placenta development=>emp24_schpo ame: full=endosomal protein p24b flags: precursor GO:0001893=>maternal placenta development=>emp24_schpo ame: full=endosomal protein p24b flags: precursor GO:…	IPR009038 (GOLD)	Component of the p24 complex; binds to GPI anchor proteins and mediates their efficient transport from the ER to the Golgi; integral membrane protein that associates with endoplasmic reticulum-derived COPII-coated vesicles
483	29	0	1	1	1	1	1	3	1	1	1	18			Protein component of the small (40S) ribosomal subunit; has similarity to E. coli S15 and rat S13 ribosomal proteins
484	29	1	1	1	1	1	1	2	1	1	1	18	GO:0002286=>T cell activation involved in immune response=>fimb_schpo ame: full=fimbrin GO:0005773=>vacuole=>fimb_schpo ame: full=fimbrin GO:0005829=>cytosol=>fimb_schpo ame: full=fimbrin GO:0007017=>microtubule-based process=>fimb_schpo ame: full=fimbrin GO:0009846=>pollen germination=>fimb_schpo ame: full=fimbrin GO:0009860=>pollen tube growth=>fimb_schpo ame: full=fimbrin GO:0015629=>actin cyt…	IPR001715 (Calponin homology domain IPR011992 (EF-hand-like domain)	Fimbrin, actin-bundling protein; cooperates with Scp1p (calponin/transgelin) in the organization and maintenance of the actin cytoskeleton
485	29	1	1	1	1	1	1	2	1	1	1	18	GO:0000226=>microtubule cytoskeleton organization=>copa_bovin ame: full=coatomer subunit alpha ame: full=alpha-coat protein short=alpha-cop ame: full=hep-cop short=hepcop contains: ame: full=xenin ame: full=xenopsin-related peptide contains: ame: full=proxenin GO:0000911=>cytokinesis by cell plate formation=>copa_bovin ame: full=coatomer subunit alpha ame: full=alpha-coat protein short=alpha-cop …	IPR016391 (Coatomer, alpha subunit)	Alpha subunit of COPI vesicle coatomer complex, which surrounds transport vesicles in the early secretory pathway
486	29	1	1	1	1	1	1	1	2	1	1	18	GO:0000122=>negative regulation of transcription from RNA polymerase II promoter=>rbbp7_danre ame: full=histone-binding protein rbbp7 ame: full=retinoblastoma-binding protein 7 short=rbbp-7 GO:0000289=>nuclear-transcribed mRNA poly(A) tail shortening=>rbbp7_danre ame: full=histone-binding protein rbbp7 ame: full=retinoblastoma-binding protein 7 short=rbbp-7 GO:0000910=>cytokinesis=>rbbp7_danre am…	IPR015943 (WD40/YVTN repeat-like-containing domain IPR020472 (G-protein beta WD-40 repeat	Subunit of the Hat1p-Hat2p histone acetyltransferase complex; required for high affinity binding of the complex to free histone H4, thereby enhancing Hat1p activity; similar to human RbAp46 and 48; has a role in telomeric silencing
487	29	1	1	1	2	1	1	1	1	1	1	18	GO:0000166=>nucleotide binding=>yhy6_schpo ame: full= proline--trna ligase ame: full=prolyl-trna synthetase short= GO:0004818=>glutamate-tRNA ligase activity=>yhy6_schpo ame: full= proline--trna ligase ame: full=prolyl-trna synthetase short= GO:0004827=>proline-tRNA ligase activity=>yhy6_schpo ame: full= proline--trna ligase ame: full=prolyl-trna synthetase short= GO:0005515=>protein binding=>yhy…	IPR002316 (Prolyl-tRNA synthetase, class IIa IPR017449 (Prolyl-tRNA synthetase, class II)	Protein of unknown function that may interact with ribosomes, based on co-purification experiments; has similarity to proline-tRNA ligase; YHR020W is an essential gene
488	29	0	1	1	1	1	1	2	2	1	1	18			Subunit of mitochondrial NAD(+)-dependent isocitrate dehydrogenase, which catalyzes the oxidation of isocitrate to alpha-ketoglutarate in the TCA cycle; phosphorylated
489	29	1	1	1	1	1	1	1	2	1	1	18	GO:0005515=>protein binding=>dcaf7_dicdi ame: full=ddb1- and cul4-associated factor 7 homolog ame: full=wd repeat-containing protein 68 homolog GO:0005730=>nucleolus=>dcaf7_dicdi ame: full=ddb1- and cul4-associated factor 7 homolog ame: full=wd repeat-containing protein 68 homolog GO:0005737=>cytoplasm=>dcaf7_dicdi ame: full=ddb1- and cul4-associated factor 7 homolog ame: full=wd repeat-containin…	IPR015943 (WD40/YVTN repeat-like-containing domain)	Putative protein of unknown function; green fluorescent protein (GFP)-fusion protein localizes to the cytoplasm and nucleus; similar to the petunia WD repeat protein an11; overexpression causes a cell cycle delay or arrest
490	29	1	0	2	1	1	1	1	1	0	1	20	GO:0005515=>protein binding=>aox_batdj ame: full=ubiquinol mitochondrial ame: full=alternative oxidase flags: precursor GO:0005740=>mitochondrial envelope=>aox_batdj ame: full=ubiquinol mitochondrial ame: full=alternative oxidase flags: precursor GO:0009916=>alternative oxidase activity=>aox_batdj ame: full=ubiquinol mitochondrial ame: full=alternative oxidase flags: precursor GO:0044425=>membran…	IPR002680 (Alternative oxidase)
491	29	2	1	1	1	1	0	1	1	2	1	18	GO:0000080=>G1 phase of mitotic cell cycle=>cdk1_bovin ame: full=cyclin-dependent kinase 1 short=cdk1 ame: full=cell division control protein 2 homolog ame: full=cell division protein kinase 1 ame: full=p34 protein kinase GO:0000083=>regulation of transcription involved in G1/S phase of mitotic cell cycle=>cdk1_bovin ame: full=cyclin-dependent kinase 1 short=cdk1 ame: full=cell division control p…
492	29	1	1	1	1	1	1	2	1	1	1	18	GO:0000023=>maltose metabolic process=>glgb_gloin ame: full= -alpha-glucan-branching enzyme ame: full=glycogen-branching enzyme GO:0000272=>polysaccharide catabolic process=>glgb_gloin ame: full= -alpha-glucan-branching enzyme ame: full=glycogen-branching enzyme GO:0003844=>1,4-alpha-glucan branching enzyme activity=>glgb_gloin ame: full= -alpha-glucan-branching enzyme ame: full=glycogen-branchin…	IPR013780 (Glycosyl hydrolase, family 13, all-beta IPR013783 (Immunoglobulin-like fold	Glycogen branching enzyme, involved in glycogen accumulation; green fluorescent protein (GFP)-fusion protein localizes to the cytoplasm in a punctate pattern
493	29	1	1	1	1	1	1	2	1	1	1	18	GO:0000084=>S phase of mitotic cell cycle=>psb2_schpo ame: full=probable proteasome subunit beta type-2 GO:0000209=>protein polyubiquitination=>psb2_schpo ame: full=probable proteasome subunit beta type-2 GO:0000216=>M/G1 transition of mitotic cell cycle=>psb2_schpo ame: full=probable proteasome subunit beta type-2 GO:0002479=>antigen processing and presentation of exogenous peptide antigen via M…	IPR001353 (Proteasome, subunit alpha/beta)	Beta 4 subunit of the 20S proteasome; localizes to the nucleus throughout the cell cycle
494	29	1	1	1	1	1	1	2	1	1	1	18	GO:0007275=>multicellular organismal development=>tsr1_schpo ame: full=ribosome biogenesis protein tsr1 homolog GO:0009987=>cellular process=>tsr1_schpo ame: full=ribosome biogenesis protein tsr1 homolog GO:0048856=>anatomical structure development=>tsr1_schpo ame: full=ribosome biogenesis protein tsr1 homolog)	IPR007034 (Ribosome biogenesis protein BMS1/TSR1, C-terminal IPR012948 (AARP2CN)	Protein required for processing of 20S pre-rRNA in the cytoplasm; associates with pre-40S ribosomal particles; inhibits the premature association of 60S subunits with assembling 40S subunits in the cytoplasm; similar to Bms1p
495	29	1	0	1	2	2	0	1	1	0	3	18	GO:0008238=>exopeptidase activity=>ym67_caeel ame: full= serine protease flags: precursor GO:0043229=>intracellular organelle=>ym67_caeel ame: full= serine protease flags: precursor GO:0044444=>cytoplasmic part=>ym67_caeel ame: full= serine protease flags: precursor)	IPR008758 (Peptidase S28)
496	29	1	1	1	1	1	1	2	1	1	1	18	GO:0001948=>glycoprotein binding=>mas5_schpo ame: full=mitochondrial protein import protein mas5 flags: precursor GO:0005634=>nucleus=>mas5_schpo ame: full=mitochondrial protein import protein mas5 flags: precursor GO:0005829=>cytosol=>mas5_schpo ame: full=mitochondrial protein import protein mas5 flags: precursor GO:0006986=>response to unfolded protein=>mas5_schpo ame: full=mitochondrial protei…	IPR015609 (Molecular chaperone, heat shock protein, Hsp40, DnaJ)	Type I HSP40 co-chaperone involved in regulation of the HSP90 and HSP70 functions; involved in protein translocation across membranes; member of the DnaJ family
497	29	1	1	1	1	1	1	2	1	1	1	18	GO:0005506=>iron ion binding=>cy1_yeast ame: full=cytochrome heme mitochondrial ame: full=complex iii subunit 4 ame: full=complex iii subunit iv ame: full=cytochrome b-c1 complex subunit 4 ame: full=ubiquinol-cytochrome-c reductase complex cytochrome c1 subunit short=cytochrome c-1 flags: precursor GO:0005743=>mitochondrial inner membrane=>cy1_yeast ame: full=cytochrome heme mitochondrial ame: fu…	IPR002326 (Cytochrome c1)	Cytochrome c1, component of the mitochondrial respiratory chain; expression is regulated by the heme-activated, glucose-repressed Hap2p/3p/4p/5p CCAAT-binding complex
498	29	1	1	1	1	1	1	2	1	1	1	18	GO:0000084=>S phase of mitotic cell cycle=>psa7_sollc ame: full=proteasome subunit alpha type-7 ame: full=20s proteasome alpha subunit d ame: full=20s proteasome subunit alpha-4 GO:0000209=>protein polyubiquitination=>psa7_sollc ame: full=proteasome subunit alpha type-7 ame: full=20s proteasome alpha subunit d ame: full=20s proteasome subunit alpha-4 GO:0000216=>M/G1 transition of mitotic cell cy…	IPR000426 (Proteasome, alpha-subunit, conserved site IPR001353 (Proteasome, subunit alpha/beta)	Alpha 4 subunit of the 20S proteasome; may replace alpha 3 subunit (Pre9p) under stress conditions to create a more active proteasomal isoform; GFP-fusion protein relocates from cytosol to the mitochondrial surface upon oxidative stress
499	29	1	1	1	1	1	1	2	1	1	1	18	GO:0001510=>RNA methylation=>rlp24_bovin ame: full=probable ribosome biogenesis protein rlp24 ame: full=ribosomal l24 domain-containing protein 1 GO:0002119=>nematode larval development=>rlp24_bovin ame: full=probable ribosome biogenesis protein rlp24 ame: full=ribosomal l24 domain-containing protein 1 GO:0003735=>structural constituent of ribosome=>rlp24_bovin ame: full=probable ribosome biogene…	IPR000988 (Ribosomal protein L24e)	Essential protein with similarity to Rpl24Ap and Rpl24Bp, associated with pre-60S ribosomal subunits and required for ribosomal large subunit biogenesis
500	29	1	1	1	1	1	1	2	1	1	1	18	GO:0004174=>electron-transferring-flavoprotein dehydrogenase activity=>etfd_human ame: full=electron transfer flavoprotein-ubiquinone mitochondrial short=etf-qo short=etf-ubiquinone oxidoreductase ame: full=electron-transferring-flavoprotein dehydrogenase short=etf dehydrogenase flags: precursor GO:0006979=>response to oxidative stress=>etfd_human ame: full=electron transfer flavoprotein-ubiquino…	IPR007859 (Electron transfer flavoprotein-ubiquinone oxidoreductase IPR013027 (FAD-dependent pyridine nucleotide-disulphide oxidoreductase)	Putative ortholog of human electron transfer flavoprotein dehydrogenase (ETF-dH); found in a large supramolecular complex with other mitochondrial dehydrogenases; may have a role in oxidative stress response
501	29	1	1	1	1	1	1	1	2	1	1	18	GO:0003743=>translation initiation factor activity=>if6_schpo ame: full=eukaryotic translation initiation factor 6 short=eif-6 GO:0005515=>protein binding=>if6_schpo ame: full=eukaryotic translation initiation factor 6 short=eif-6 GO:0005638=>lamin filament=>if6_schpo ame: full=eukaryotic translation initiation factor 6 short=eif-6 GO:0005730=>nucleolus=>if6_schpo ame: full=eukaryotic translation…	IPR002769 (Translation initiation factor IF6)	Constituent of 66S pre-ribosomal particles, has similarity to human translation initiation factor 6 (eIF6); may be involved in the biogenesis and or stability of 60S ribosomal subunits
502	29	1	0	1	1	1	1	2	1	1	1	19	GO:0000819=>sister chromatid segregation=>arl8b_human ame: full=adp-ribosylation factor-like protein 8b ame: full=adp-ribosylation factor-like protein 10c ame: full=novel small g protein indispensable for equal chromosome segregation 1 GO:0000910=>cytokinesis=>arl8b_human ame: full=adp-ribosylation factor-like protein 8b ame: full=adp-ribosylation factor-like protein 10c ame: full=novel small g p…	IPR005225 (Small GTP-binding protein)
503	29	1	1	1	1	1	1	1	1	1	1	19	GO:0072546=>ER membrane protein complex=>emc4_bovin ame: full=er membrane protein complex subunit 4 ame: full=transmembrane protein 85)	IPR009445 (Protein of unknown function DUF1077, TMEM85)	Member of a transmembrane complex required for efficient folding of proteins in the ER; null mutant displays induction of the unfolded protein response; human ortholog TMEM85 may function in apoptosis
504	29	1	0	1	1	1	1	1	1	1	1	20	GO:0000085=>G2 phase of mitotic cell cycle=>csn2_xenla ame: full=cop9 signalosome complex subunit 2 short=signalosome subunit 2 GO:0000122=>negative regulation of transcription from RNA polymerase II promoter=>csn2_xenla ame: full=cop9 signalosome complex subunit 2 short=signalosome subunit 2 GO:0003714=>transcription corepressor activity=>csn2_xenla ame: full=cop9 signalosome complex subunit 2 s…	IPR000717 (Proteasome component (PCI) domain IPR011990 (Tetratricopeptide-like helical
505	29	0	1	1	1	1	1	1	1	1	1	20			Mitochondrial adenylate kinase, catalyzes the reversible synthesis of GTP and AMP from GDP and ADP; may serve as a back-up for synthesizing GTP or ADP depending on metabolic conditions; 3' sequence of ADK2 varies with strain background
506	29	1	1	1	1	1	1	2	1	1	1	18	GO:0005515=>protein binding=>if5_schpo ame: full=probable eukaryotic translation initiation factor 5 short=eif-5 GO:0005737=>cytoplasm=>if5_schpo ame: full=probable eukaryotic translation initiation factor 5 short=eif-5 GO:0006417=>regulation of translation=>if5_schpo ame: full=probable eukaryotic translation initiation factor 5 short=eif-5 GO:0008135=>translation factor activity, nucleic acid bi…	IPR002735 (Translation initiation factor IF2/IF5 IPR016024 (Armadillo-type fold)	Translation initiation factor eIF5; functions both as a GTPase-activating protein to mediate hydrolysis of ribosome-bound GTP and as a GDP dissociation inhibitor to prevent recycling of eIF2
507	29	1	1	1	1	1	1	2	1	1	1	18	GO:0004775=>succinate-CoA ligase (ADP-forming) activity=>suca_drome ame: full=succinyl- ligase subunit mitochondrial ame: full=succinyl- synthetase subunit alpha short=scs-alpha flags: precursor GO:0005507=>copper ion binding=>suca_drome ame: full=succinyl- ligase subunit mitochondrial ame: full=succinyl- synthetase subunit alpha short=scs-alpha flags: precursor GO:0005618=>cell wall=>suca_drome …	IPR005810 (Succinyl-CoA ligase, alpha subunit IPR016040 (NAD(P)-binding domain	Alpha subunit of succinyl-CoA ligase, which is a mitochondrial enzyme of the TCA cycle that catalyzes the nucleotide-dependent conversion of succinyl-CoA to succinate; phosphorylated
508	29	1	1	1	1	1	1	2	1	1	1	18	GO:0005488=>binding=>pob3_schpo ame: full=fact complex subunit pob3 ame: full=facilitates chromatin transcription complex subunit pob3 GO:0005634=>nucleus=>pob3_schpo ame: full=fact complex subunit pob3 ame: full=facilitates chromatin transcription complex subunit pob3 GO:0006351=>transcription, DNA-dependent=>pob3_schpo ame: full=fact complex subunit pob3 ame: full=facilitates chromatin transcri…	IPR000969 (Structure-specific recognition protein)	Subunit of the heterodimeric FACT complex (Spt16p-Pob3p), which associates with chromatin via interaction with Nhp6Ap and Nhp6Bp, and reorganizes nucleosomes to facilitate access to DNA by RNA and DNA polymerases
509	29	1	1	1	1	1	1	2	1	1	1	18	GO:0003779=>actin binding=>ncs1_schpo ame: full=calcium-binding protein ncs-1 GO:0005509=>calcium ion binding=>ncs1_schpo ame: full=calcium-binding protein ncs-1 GO:0005829=>cytosol=>ncs1_schpo ame: full=calcium-binding protein ncs-1 GO:0005886=>plasma membrane=>ncs1_schpo ame: full=calcium-binding protein ncs-1 GO:0010975=>regulation of neuron projection development=>ncs1_schpo ame: full=calcium…	IPR001125 (Recoverin)	N-myristoylated calcium-binding protein that may have a role in intracellular signaling through its regulation of the phosphatidylinositol 4-kinase Pik1p; member of the recoverin/frequenin branch of the EF-hand superfamily
510	29	1	1	1	1	1	1	2	1	1	1	18	GO:0004618=>phosphoglycerate kinase activity=>pgk_aspor ame: full=phosphoglycerate kinase GO:0005515=>protein binding=>pgk_aspor ame: full=phosphoglycerate kinase GO:0005524=>ATP binding=>pgk_aspor ame: full=phosphoglycerate kinase GO:0005576=>extracellular region=>pgk_aspor ame: full=phosphoglycerate kinase GO:0005694=>chromosome=>pgk_aspor ame: full=phosphoglycerate kinase GO:0005829=>cytosol=>…	IPR001576 (Phosphoglycerate kinase)	3-phosphoglycerate kinase, catalyzes transfer of high-energy phosphoryl groups from the acyl phosphate of 1,3-bisphosphoglycerate to ADP to produce ATP; key enzyme in glycolysis and gluconeogenesis
511	29	1	1	1	1	1	1	2	1	1	1	18	GO:0002119=>nematode larval development=>brx1_yeast ame: full=ribosome biogenesis protein brx1 GO:0005730=>nucleolus=>brx1_yeast ame: full=ribosome biogenesis protein brx1 GO:0007276=>gamete generation=>brx1_yeast ame: full=ribosome biogenesis protein brx1 GO:0009792=>embryo development ending in birth or egg hatching=>brx1_yeast ame: full=ribosome biogenesis protein brx1 GO:0040010=>positive reg…	IPR004154 (Anticodon-binding IPR007109 (Brix domain)	Nucleolar protein, constituent of 66S pre-ribosomal particles; depletion leads to defects in rRNA processing and a block in the assembly of large ribosomal subunits; possesses a sigma(70)-like RNA-binding motif
512	29	1	1	1	1	1	1	2	1	1	1	18	GO:0030663=>COPI-coated vesicle membrane=>cope_crigr ame: full=coatomer subunit epsilon ame: full=epsilon-coat protein short=epsilon-cop ame: full=ldlf GO:0048193=>Golgi vesicle transport=>cope_crigr ame: full=coatomer subunit epsilon ame: full=epsilon-coat protein short=epsilon-cop ame: full=ldlf)	IPR006822 (Coatomer, epsilon subunit)	Epsilon-COP subunit of the coatomer; regulates retrograde Golgi-to-ER protein traffic; stabilizes Cop1p, the alpha-COP and the coatomer complex; non-essential for cell growth
513	29	1	1	1	1	1	1	2	1	1	1	18	GO:0002119=>nematode larval development=>ufd1_schpo ame: full=ubiquitin fusion degradation protein 1 short=ub fusion protein 1 GO:0005515=>protein binding=>ufd1_schpo ame: full=ubiquitin fusion degradation protein 1 short=ub fusion protein 1 GO:0005634=>nucleus=>ufd1_schpo ame: full=ubiquitin fusion degradation protein 1 short=ub fusion protein 1 GO:0008340=>determination of adult lifespan=>ufd1_…	IPR004854 (Ubiquitin fusion degradation protein UFD1)	Protein that interacts with Cdc48p and Npl4p, involved in recognition of polyubiquitinated proteins and their presentation to the 26S proteasome for degradation; involved in transporting proteins from the ER to the cytosol
514	29	1	1	1	1	1	1	2	1	1	1	18	GO:0000084=>S phase of mitotic cell cycle=>psb5_yeast ame: full=proteasome component pre2 ame: full=macropain subunit pre2 ame: full=multicatalytic endopeptidase complex subunit pre2 ame: full=proteinase ysce subunit pre2 flags: precursor GO:0000209=>protein polyubiquitination=>psb5_yeast ame: full=proteasome component pre2 ame: full=macropain subunit pre2 ame: full=multicatalytic endopeptidase c…	IPR001353 (Proteasome, subunit alpha/beta)	Beta 5 subunit of the 20S proteasome, responsible for the chymotryptic activity of the proteasome
515	29	0	0	0	0	0	0	29	0	0	0	0
516	28	0	2	2	1	2	4	6	3	5	3	0			Protein with similarity to monocarboxylate permeases, appears not to be involved in transport of monocarboxylates such as lactate, pyruvate or acetate across the plasma membrane Protein with similarity to mammalian monocarboxylate permeases, which are involved in transport of monocarboxylic acids across the plasma membrane; mutant is not deficient in monocarboxylate transport
517	28	1	1	3	1	5	3	3	3	6	2	0	GO:0005886=>plasma membrane=>opt5_arath ame: full=oligopeptide transporter 5 short= 5 GO:0006811=>ion transport=>opt5_arath ame: full=oligopeptide transporter 5 short= 5 GO:0006857=>oligopeptide transport=>opt5_arath ame: full=oligopeptide transporter 5 short= 5 GO:0006865=>amino acid transport=>opt5_arath ame: full=oligopeptide transporter 5 short= 5 GO:0015198=>oligopeptide transporter activity…	IPR004813 (Oligopeptide transporter OPT superfamily)	Proton-coupled oligopeptide transporter of the plasma membrane; also transports glutathione and phytochelatin; member of the OPT family
518	28	0	3	2	2	2	2	6	3	2	2	4			Gamma subunit of translational elongation factor eEF1B, stimulates the binding of aminoacyl-tRNA (AA-tRNA) to ribosomes by releasing eEF1A (Tef1p/Tef2p) from the ribosomal complex; contains two ABC cassettes; binds and hydrolyzes ATP Translational elongation factor EF-3; paralog of YEF3 and member of the ABC superfamily; stimulates EF-1 alpha-dependent binding of aminoacyl-tRNA by the ribosome; n…
519	28	0	4	4	1	3	1	4	3	3	5	0			Plasma membrane arginine permease, requires phosphatidyl ethanolamine (PE) for localization, exclusively associated with lipid rafts; mutation confers canavanine resistance Arginine transporter; expression is normally very low and it is unclear what conditions would induce significant expression Lysine permease; one of three amino acid permeases (Alp1p, Can1p, Lyp1p) responsible for uptake of cat…
520	28	25	0	0	0	0	0	2	1	0	0	0	GO:0000030=>mannosyltransferase activity=>pmt1_canal ame: full=dolichyl-phosphate-mannose--protein mannosyltransferase 1 GO:0005783=>endoplasmic reticulum=>pmt1_canal ame: full=dolichyl-phosphate-mannose--protein mannosyltransferase 1 GO:0005886=>plasma membrane=>pmt1_canal ame: full=dolichyl-phosphate-mannose--protein mannosyltransferase 1 GO:0009267=>cellular response to starvation=>pmt1_canal …	IPR008985 (Concanavalin A-like lectin/glucanase IPR016093 (MIR motif) IPR016093 (MIR motif) IPR013320 (Concanavalin A-like lectin/glucanase, subgroup)
521	28	28	0	0	0	0	0	0	0	0	0	0	GO:0005634=>nucleus=>ste11_pneca ame: full=hmg-box protein ste11 GO:0009987=>cellular process=>ste11_pneca ame: full=hmg-box protein ste11 GO:0044702=>single organism reproductive process=>ste11_pneca ame: full=hmg-box protein ste11) GO:0043231=>intracellular membrane-bounded organelle=>ccdc8_rat ame: full=coiled-coil domain-containing protein 8 GO:0044444=>cytoplasmic part=>ccdc8_rat ame: full=c…	IPR009071 (High mobility group, superfamily) IPR000910 (High mobility group, HMG1/HMG2)
522	28	17	1	0	0	9	1	0	0	0	0	0	GO:0004364=>glutathione transferase activity=>gstfa_arath ame: full=glutathione s-transferase f10 short= 10 ame: full= 4 ame: full=gst class-phi member 10 ame: full=protein early response to dehydration 13 GO:0004602=>glutathione peroxidase activity=>gstfa_arath ame: full=glutathione s-transferase f10 short= 10 ame: full= 4 ame: full=gst class-phi member 10 ame: full=protein early response to deh…	IPR010987 (Glutathione S-transferase, C-terminal-like IPR012336 (Thioredoxin-like fold)	Glutathione S-transferase capable of homodimerization; functional overlap with Gtt2p, Grx1p, and Grx2p
523	28	28	0	0	0	0	0	0	0	0	0	0	GO:0000080=>G1 phase of mitotic cell cycle=>rl401_yeast ame: full=ubiquitin-60s ribosomal protein l40 contains: ame: full=ubiquitin contains: ame: full=60s ribosomal protein l40 ame: full=cep52 flags: precursor GO:0000084=>S phase of mitotic cell cycle=>rl401_yeast ame: full=ubiquitin-60s ribosomal protein l40 contains: ame: full=ubiquitin contains: ame: full=60s ribosomal protein l40 ame: full=c…	IPR019955 (Ubiquitin supergroup) IPR015496 (Ubiquilin)
524	28	28	0	0	0	0	0	0	0	0	0	0		IPR004968 (DNA primase/nucleoside triphosphatase, C-terminal)
525	28	28	0	0	0	0	0	0	0	0	0	0		IPR011579 (ATPase domain, prokaryote) IPR003593 (ATPase, AAA+ type, core)
526	28	2	1	1	1	1	1	0	1	1	1	18	GO:0006914=>autophagy=>wipi3_human ame: full=wd repeat domain phosphoinositide-interacting protein 3 short=wipi-3 ame: full=wd repeat-containing protein 45-like short=wdr45-like protein ame: full=wipi49-like protein GO:0035091=>phosphatidylinositol binding=>wipi3_human ame: full=wd repeat domain phosphoinositide-interacting protein 3 short=wipi-3 ame: full=wd repeat-containing protein 45-like sho…	IPR015943 (WD40/YVTN repeat-like-containing domain)	Phosphatidylinositol 3,5-bisphosphate-binding protein, plays a role in micronucleophagy; predicted to fold as a seven-bladed beta-propeller; displays punctate cytoplasmic localization
527	28	2	1	1	1	1	1	1	1	0	1	18	GO:0001726=>ruffle=>arf6_chick ame: full=adp-ribosylation factor 6 GO:0001889=>liver development=>arf6_chick ame: full=adp-ribosylation factor 6 GO:0003677=>DNA binding=>arf6_chick ame: full=adp-ribosylation factor 6 GO:0003700=>sequence-specific DNA binding transcription factor activity=>arf6_chick ame: full=adp-ribosylation factor 6 GO:0003924=>GTPase activity=>arf6_chick ame: full=adp-ribosyla…	IPR005225 (Small GTP-binding protein)	Glucose-repressible ADP-ribosylation factor, GTPase of the Ras superfamily involved in development of polarity; also has mRNA binding activity
528	28	0	0	0	0	28	0	0	0	0	0	0
529	28	0	0	0	0	28	0	0	0	0	0	0
530	28	1	1	1	1	3	1	1	1	1	1	16	GO:0006396=>RNA processing=>prpf3_bovin ame: full=u4 u6 small nuclear ribonucleoprotein prp3 ame: full=pre-mrna-splicing factor 3 GO:0031981=>nuclear lumen=>prpf3_bovin ame: full=u4 u6 small nuclear ribonucleoprotein prp3 ame: full=pre-mrna-splicing factor 3)	IPR010541 (Domain of unknown function DUF1115 IPR013881 (Pre-mRNA-splicing factor 3)	Splicing factor, component of the U4/U6-U5 snRNP complex
531	28	0	0	0	0	2	0	0	0	0	0	26
532	28	1	2	1	1	2	0	1	2	1	1	16	GO:0000077=>DNA damage checkpoint=>fhkc_dicdi ame: full=probable serine threonine-protein kinase fhkc ame: full=forkhead-associated protein kinase c ame: full=protein kinase 1 GO:0003006=>developmental process involved in reproduction=>fhkc_dicdi ame: full=probable serine threonine-protein kinase fhkc ame: full=forkhead-associated protein kinase c ame: full=protein kinase 1 GO:0004683=>calmodulin…	IPR008984 (SMAD/FHA domain IPR020636 (Calcium/calmodulin-dependent protein kinase-like)	Meiosis-specific serine/threonine protein kinase, functions in meiotic checkpoint, promotes recombination between homologous chromosomes by suppressing double strand break repair between sister chromatids Cell-cycle checkpoint serine-threonine kinase required for DNA damage-induced transcription of certain target genes, phosphorylation of Rad55p and Sml1p, and transient G2/M arrest after DNA dama…
533	28	1	1	1	1	2	1	2	2	0	1	16	GO:0004161=>dimethylallyltranstransferase activity=>ggpps_muccl ame: full=geranylgeranyl pyrophosphate synthase short=ggpp synthase short=ggppsase ame: full=( )-farnesyl diphosphate synthase ame: full=dimethylallyltranstransferase ame: full=farnesyl diphosphate synthase ame: full=farnesyltranstransferase ame: full=geranylgeranyl diphosphate synthase ame: full=geranyltranstransferase GO:0004311=>f…	IPR017446 (Polyprenyl synthetase-related)	Geranylgeranyl diphosphate synthase, increases the intracellular pool of geranylgeranyl diphosphate, suppressor of bet2 mutation that causes defective geranylgeranylation of small GTP-binding proteins that mediate vesicular traffic
534	28	0	2	1	1	2	1	1	1	0	1	18			Putative pyridoxal kinase, a key enzyme involved in pyridoxal 5'-phosphate synthesis, the active form of vitamin B6; required for genome integrity; involved in bud-site selection; similarity to yeast BUD17 and human pyridoxal kinase (PDXK) Putative pyridoxal kinase, a key enzyme in vitamin B6 metabolism; involved in bud-site selection; diploid mutants display a random rather than a bipolar buddin…
535	28	1	1	1	1	2	1	1	1	0	1	18	GO:0000209=>protein polyubiquitination=>blmh_chick ame: full=bleomycin hydrolase short=bh short=blm hydrolase short=bmh ame: full=aminopeptidase h GO:0002474=>antigen processing and presentation of peptide antigen via MHC class I=>blmh_chick ame: full=bleomycin hydrolase short=bh short=blm hydrolase short=bmh ame: full=aminopeptidase h GO:0004177=>aminopeptidase activity=>blmh_chick ame: full=ble…	IPR000169 (Peptidase, cysteine peptidase active site IPR004134 (Peptidase C1B, bleomycin hydrolase)	Cysteine aminopeptidase with homocysteine-thiolactonase activity; protects cells against homocysteine toxicity; has bleomycin hydrolase activity in vitro; transcription is regulated by galactose via Gal4p; orthologous to human BLMH
536	28	1	1	1	0	2	1	1	1	1	1	18	GO:0000287=>magnesium ion binding=>dut_arath ame: full=deoxyuridine 5 -triphosphate nucleotidohydrolase short=dutpase ame: full=dutp pyrophosphatase ame: full=dutp-pyrophosphatase-like 1 short= 1 GO:0004170=>dUTP diphosphatase activity=>dut_arath ame: full=deoxyuridine 5 -triphosphate nucleotidohydrolase short=dutpase ame: full=dutp pyrophosphatase ame: full=dutp-pyrophosphatase-like 1 short= 1 G…	IPR008180 (DeoxyUTP pyrophosphatase domain IPR008181 (DeoxyUTP pyrophosphatase)	deoxyuridine triphosphate diphosphatase (dUTPase); catalyzes hydrolysis of dUTP to dUMP and PPi, thereby preventing incorporation of uracil into DNA during replication; critical for the maintenance of genetic stability; also has diphosphatase activity on deoxyinosine triphosphate
537	28	1	1	1	1	1	1	1	1	1	1	18	GO:0005515=>protein binding=>ap2a_drome ame: full=ap-2 complex subunit alpha ame: full=alpha-adaptin GO:0005829=>cytosol=>ap2a_drome ame: full=ap-2 complex subunit alpha ame: full=alpha-adaptin GO:0006886=>intracellular protein transport=>ap2a_drome ame: full=ap-2 complex subunit alpha ame: full=alpha-adaptin GO:0007411=>axon guidance=>ap2a_drome ame: full=ap-2 complex subunit alpha ame: full=alp…	IPR009028 (Clathrin/coatomer adaptor, adaptin-like, appendage, C-terminal subdomain IPR013041 (Clathrin/coatomer adaptor, adaptin-like, appendage, Ig-like subdomain	Alpha-adaptin, large subunit of the clathrin associated protein complex (AP-2); involved in vesicle mediated transport
538	28	0	0	0	0	0	0	0	0	0	0	28
539	28	1	1	1	1	1	1	1	1	1	1	18	GO:0008652=>cellular amino acid biosynthetic process=>proa_schpo ame: full=probable gamma-glutamyl phosphate reductase short=gpr ame: full=glutamate-5-semialdehyde dehydrogenase short=gsa dehydrogenase ame: full=glutamyl-gamma-semialdehyde dehydrogenase GO:0016491=>oxidoreductase activity=>proa_schpo ame: full=probable gamma-glutamyl phosphate reductase short=gpr ame: full=glutamate-5-semialdehyd…	IPR016161 (Aldehyde/histidinol dehydrogenase)	Gamma-glutamyl phosphate reductase, catalyzes the second step in proline biosynthesis
540	28	0	0	0	1	0	1	0	0	0	1	25
541	28	1	1	1	1	1	1	1	1	1	1	18	GO:0005634=>nucleus=>dca13_mouse ame: full=ddb1- and cul4-associated factor 13 ame: full=wd repeat and sof domain-containing protein 1 GO:0016567=>protein ubiquitination=>dca13_mouse ame: full=ddb1- and cul4-associated factor 13 ame: full=wd repeat and sof domain-containing protein 1 GO:0042254=>ribosome biogenesis=>dca13_mouse ame: full=ddb1- and cul4-associated factor 13 ame: full=wd repeat and…	IPR007287 (Sof1-like protein IPR015943 (WD40/YVTN repeat-like-containing domain	Essential protein required for biogenesis of 40S (small) ribosomal subunit; has similarity to the beta subunit of trimeric G-proteins and the splicing factor Prp4p
542	28	1	1	1	1	1	1	1	1	1	1	18	GO:0000244=>assembly of spliceosomal tri-snRNP=>prp31_xenla ame: full=u4 u6 small nuclear ribonucleoprotein prp31 ame: full=pre-mrna-processing factor 31 GO:0003676=>nucleic acid binding=>prp31_xenla ame: full=u4 u6 small nuclear ribonucleoprotein prp31 ame: full=pre-mrna-processing factor 31 GO:0005515=>protein binding=>prp31_xenla ame: full=u4 u6 small nuclear ribonucleoprotein prp31 ame: full=…	IPR002687 (Pre-mRNA processing ribonucleoprotein, snoRNA-binding domain IPR012976 (NOSIC	Splicing factor, component of the U4/U6-U5 snRNP complex
543	28	1	2	1	1	1	1	1	2	1	1	16	GO:0001541=>ovarian follicle development=>sco1_yeast ame: full=protein mitochondrial flags: precursor GO:0001701=>in utero embryonic development=>sco1_yeast ame: full=protein mitochondrial flags: precursor GO:0002020=>protease binding=>sco1_yeast ame: full=protein mitochondrial flags: precursor GO:0002318=>myeloid progenitor cell differentiation=>sco1_yeast ame: full=protein mitochondrial flags: …	IPR003782 (Copper chaperone SCO1/SenC IPR012336 (Thioredoxin-like fold)	Protein anchored to the mitochondrial inner membrane, similar to Sco1p and may have a redundant function with Sco1p in delivery of copper to cytochrome c oxidase; interacts with Cox2p Copper-binding protein of the mitochondrial inner membrane, required for cytochrome c oxidase activity and respiration; may function to deliver copper to cytochrome c oxidase; has similarity to thioredoxins
544	28	1	1	1	2	1	1	1	1	1	1	17	GO:0000003=>reproduction=>aimp1_crigr ame: full=aminoacyl trna synthase complex-interacting multifunctional protein 1 ame: full=multisynthase complex auxiliary component p43 contains: ame: full=endothelial monocyte-activating polypeptide 2 ame: full=emap-ii ame: full=small inducible cytokine subfamily e member 1 GO:0000049=>tRNA binding=>aimp1_crigr ame: full=aminoacyl trna synthase complex-inter…	IPR010987 (Glutathione S-transferase, C-terminal-like IPR016027 (Nucleic acid-binding, OB-fold-like)	Protein that binds tRNA and methionyl- and glutamyl-tRNA synthetases (Mes1p and Gus1p), delivering tRNA to them, stimulating catalysis, and ensuring their localization to the cytoplasm; also binds quadruplex nucleic acids
545	28	1	1	1	1	1	1	1	1	1	1	18	GO:0005730=>nucleolus=>mrt4_schpo ame: full=mrna turnover protein 4 homolog GO:0006412=>translation=>mrt4_schpo ame: full=mrna turnover protein 4 homolog GO:0016032=>viral reproduction=>mrt4_schpo ame: full=mrna turnover protein 4 homolog GO:0016070=>RNA metabolic process=>mrt4_schpo ame: full=mrna turnover protein 4 homolog GO:0030529=>ribonucleoprotein complex=>mrt4_schpo ame: full=mrna turnove…	IPR001790 (Ribosomal protein L10/acidic P0)	Protein involved in mRNA turnover and ribosome assembly, localizes to the nucleolus
546	28	1	1	1	1	1	1	1	1	1	1	18	GO:0005829=>cytosol=>amer1_human ame: full=amme syndrome candidate gene 1 protein GO:0009651=>response to salt stress=>amer1_human ame: full=amme syndrome candidate gene 1 protein)	IPR002733 (AMMECR1)	Putative protein of unknown function; transcription induced by the unfolded protein response; green fluorescent protein (GFP)-fusion protein localizes to both the cytoplasm and the nucleus
547	28	1	1	1	1	1	1	1	1	1	1	18	GO:0005813=>centrosome=>sla2_schpo ame: full=endocytosis protein end4 ame: full=sla2 protein homolog GO:0005911=>cell-cell junction=>sla2_schpo ame: full=endocytosis protein end4 ame: full=sla2 protein homolog GO:0005925=>focal adhesion=>sla2_schpo ame: full=endocytosis protein end4 ame: full=sla2 protein homolog GO:0006897=>endocytosis=>sla2_schpo ame: full=endocytosis protein end4 ame: full=sla…	IPR002558 (I/LWEQ IPR008942 (ENTH/VHS	Transmembrane actin-binding protein involved in membrane cytoskeleton assembly and cell polarization; adaptor protein that links actin to clathrin and endocytosis; present in the actin cortical patch of the emerging bud tip; dimer in vivo
548	28	1	1	1	1	1	1	1	1	1	1	18	GO:0000278=>mitotic cell cycle=>uba3_dicdi ame: full=nedd8-activating enzyme e1 catalytic subunit ame: full=nedd8-activating enzyme e1c ame: full=ubiquitin-activating enzyme e1c ame: full=ubiquitin-like modifier-activating enzyme 3 short=ubiquitin-activating enzyme 3 GO:0005634=>nucleus=>uba3_dicdi ame: full=nedd8-activating enzyme e1 catalytic subunit ame: full=nedd8-activating enzyme e1c ame: f…	IPR016040 (NAD(P)-binding domain)	Protein that acts together with Ula1p to activate Rub1p before its conjugation to proteins (neddylation), which may play a role in protein degradation; GFP-fusion protein localizes to the cytoplasm in a punctate pattern
549	28	1	1	1	1	1	1	1	1	1	1	18	GO:0003824=>catalytic activity=>lys2_schpo ame: full=l-aminoadipate-semialdehyde dehydrogenase ame: full=alpha-aminoadipate reductase short=alpha-ar GO:0006520=>cellular amino acid metabolic process=>lys2_schpo ame: full=l-aminoadipate-semialdehyde dehydrogenase ame: full=alpha-aminoadipate reductase short=alpha-ar GO:0044249=>cellular biosynthetic process=>lys2_schpo ame: full=l-aminoadipate-sem…	IPR000873 (AMP-dependent synthetase/ligase IPR001242 (Condensation domain)	Alpha aminoadipate reductase, catalyzes the reduction of alpha-aminoadipate to alpha-aminoadipate 6-semialdehyde, which is the fifth step in biosynthesis of lysine; activation requires posttranslational phosphopantetheinylation by Lys5p
550	28	1	1	1	1	1	1	1	1	1	1	18	GO:0005200=>structural constituent of cytoskeleton=>arc1a_rat ame: full=actin-related protein 2 3 complex subunit 1a GO:0005488=>binding=>arc1a_rat ame: full=actin-related protein 2 3 complex subunit 1a GO:0005885=>Arp2/3 protein complex=>arc1a_rat ame: full=actin-related protein 2 3 complex subunit 1a GO:0006928=>cellular component movement=>arc1a_rat ame: full=actin-related protein 2 3 complex …	IPR017383 (Actin-related protein 2/3 complex, subunit 1)	Subunit of the ARP2/3 complex, which is required for the motility and integrity of cortical actin patches
551	28	1	1	1	1	1	1	1	1	1	1	18	GO:0000408=>EKC/KEOPS complex=>osgep_nemve ame: full=probable trna threonylcarbamoyladenosine biosynthesis protein osgep ame: full=t a37 threonylcarbamoyladenosine biosynthesis protein osgep GO:0000723=>telomere maintenance=>osgep_nemve ame: full=probable trna threonylcarbamoyladenosine biosynthesis protein osgep ame: full=t a37 threonylcarbamoyladenosine biosynthesis protein osgep GO:0000781=>ch…	IPR000905 (Peptidase M22, glycoprotease IPR017861 (Peptidase M22, glycoprotease, subgroup)	Highly conserved ATPase of HSP70/DnaK family; component of the EKC/KEOPS complex with Bud32p, Cgi121p, Pcc1p, and Gon7p; EKC/KEOPS complex is required for t6A tRNA modification and may have roles in telomere maintenance and transcription
552	28	1	1	1	1	1	1	1	1	1	1	18	GO:0005739=>mitochondrion=>oac1_schpo ame: full=mitochondrial oxaloacetate transport protein GO:0005975=>carbohydrate metabolic process=>oac1_schpo ame: full=mitochondrial oxaloacetate transport protein GO:0006810=>transport=>oac1_schpo ame: full=mitochondrial oxaloacetate transport protein GO:0016020=>membrane=>oac1_schpo ame: full=mitochondrial oxaloacetate transport protein)	IPR001993 (Mitochondrial substrate carrier)	Mitochondrial inner membrane transporter, transports oxaloacetate, sulfate, thiosulfate, and isopropylmalate; member of the mitochondrial carrier family
553	28	0	1	1	1	1	1	3	2	1	1	16			Protein component of the small (40S) ribosomal subunit; has similarity to rat ribosomal protein S12
554	28	1	1	1	1	1	1	1	1	1	1	18	GO:0005750=>mitochondrial respiratory chain complex III=>mppb_lened ame: full=mitochondrial-processing peptidase subunit beta ame: full=beta-mpp flags: precursor GO:0005759=>mitochondrial matrix=>mppb_lened ame: full=mitochondrial-processing peptidase subunit beta ame: full=beta-mpp flags: precursor GO:0006119=>oxidative phosphorylation=>mppb_lened ame: full=mitochondrial-processing peptidase sub…	IPR011249 (Metalloenzyme, LuxS/M16 peptidase-like, metal-binding)	Smaller subunit of the mitochondrial processing protease (MPP), essential processing enzyme that cleaves the N-terminal targeting sequences from mitochondrially imported proteins
555	28	1	1	1	1	1	1	1	1	1	1	18	GO:0004615=>phosphomannomutase activity=>pmm_yeast ame: full=phosphomannomutase short=pmm GO:0005515=>protein binding=>pmm_yeast ame: full=phosphomannomutase short=pmm GO:0005829=>cytosol=>pmm_yeast ame: full=phosphomannomutase short=pmm GO:0006094=>gluconeogenesis=>pmm_yeast ame: full=phosphomannomutase short=pmm GO:0006096=>glycolysis=>pmm_yeast ame: full=phosphomannomutase short=pmm GO:0006488…	IPR006379 (HAD-superfamily hydrolase, subfamily IIB IPR023214 (HAD-like domain)	Phosphomannomutase, involved in synthesis of GDP-mannose and dolichol-phosphate-mannose; required for folding and glycosylation of secretory proteins in the ER lumen
556	28	0	1	1	1	1	1	1	2	1	1	18			Ribosomal protein of the large (60S) ribosomal subunit, has similarity to E. coli L15 and rat L27a ribosomal proteins; may have peptidyl transferase activity; can mutate to cycloheximide resistance
557	28	1	1	1	1	1	1	3	2	1	1	15	GO:0002168=>instar larval development=>cyb5_morap ame: full=cytochrome b5 GO:0004033=>aldo-keto reductase (NADP) activity=>cyb5_morap ame: full=cytochrome b5 GO:0004129=>cytochrome-c oxidase activity=>cyb5_morap ame: full=cytochrome b5 GO:0005741=>mitochondrial outer membrane=>cyb5_morap ame: full=cytochrome b5 GO:0005783=>endoplasmic reticulum=>cyb5_morap ame: full=cytochrome b5 GO:0005811=>lipi…	IPR001199 (Cytochrome b5)	Cytochrome b5, involved in the sterol and lipid biosynthesis pathways; acts as an electron donor to support sterol C5-6 desaturation
558	28	1	1	1	1	1	1	1	1	1	1	18	GO:0000166=>nucleotide binding=>prp46_schpo ame: full=pre-mrna-splicing factor prp5 ame: full=complexed with cdc5 protein 1 ame: full=pre-mrna-processing protein 5 GO:0000398=>mRNA splicing, via spliceosome=>prp46_schpo ame: full=pre-mrna-splicing factor prp5 ame: full=complexed with cdc5 protein 1 ame: full=pre-mrna-processing protein 5 GO:0003714=>transcription corepressor activity=>prp46_schpo…	IPR015943 (WD40/YVTN repeat-like-containing domain IPR020472 (G-protein beta WD-40 repeat)	Member of the NineTeen Complex (NTC) that contains Prp19p and stabilizes U6 snRNA in catalytic forms of the spliceosome containing U2, U5, and U6 snRNAs
559	28	1	1	1	1	1	1	1	1	1	1	18	GO:0010468=>regulation of gene expression=>csn12_crynb ame: full=protein csn12 homolog GO:0048522=>positive regulation of cellular process=>csn12_crynb ame: full=protein csn12 homolog GO:0048523=>negative regulation of cellular process=>csn12_crynb ame: full=protein csn12 homolog GO:0048534=>hematopoietic or lymphoid organ development=>csn12_crynb ame: full=protein csn12 homolog)	IPR000717 (Proteasome component (PCI) domain IPR013143 (PCI/PINT associated module)	Protein that forms a complex with Thp3p; may have a role in transcription elongation and/or mRNA splicing; identified as a COP9 signalosome component but phenotype and interactions suggest it may not be involved with the signalosome
560	28	1	1	1	1	1	1	1	1	1	1	18	GO:0003975=>UDP-N-acetylglucosamine-dolichyl-phosphate N-acetylglucosaminephosphotransferase activity=>gpt_crigr ame: full=udp-n-acetylglucosamine--dolichyl-phosphate n-acetylglucosaminephosphotransferase ame: full= c-1-p transferase short=g1pt short=gpt ame: full=n-acetylglucosamine-1-phosphate transferase GO:0006488=>dolichol-linked oligosaccharide biosynthetic process=>gpt_crigr ame: full=udp-…	IPR000715 (Glycosyl transferase, family 4)	UDP-N-acetyl-glucosamine-1-P transferase, transfers Glc-Nac-P from UDP-GlcNac to Dol-P in the ER in the first step of the dolichol pathway of protein asparagine-linked glycosylation; inhibited by tunicamycin
561	28	1	1	1	1	1	1	1	1	1	1	18	GO:0000175=>3'-5'-exoribonuclease activity=>rrp44_mouse ame: full=exosome complex exonuclease rrp44 ame: full=protein dis3 homolog ame: full=ribosomal rna-processing protein 44 GO:0000176=>nuclear exosome (RNase complex)=>rrp44_mouse ame: full=exosome complex exonuclease rrp44 ame: full=protein dis3 homolog ame: full=ribosomal rna-processing protein 44 GO:0004519=>endonuclease activity=>rrp44_mou…	IPR001900 (Ribonuclease II/R IPR006596 (Nucleotide binding protein, PINc	Exosome core complex catalytic subunit; possesses both endonuclease and 3'-5' exonuclease activity; involved in 3'-5' RNA processing and degradation in both the nucleus and the cytoplasm; has similarity to E. coli RNase R and to human DIS3
562	28	1	1	1	2	1	1	2	1	1	1	16	GO:0000003=>reproduction=>vatd_neucr ame: full=v-type proton atpase subunit d short=v-atpase subunit d ame: full=vacuolar proton pump subunit d GO:0000221=>vacuolar proton-transporting V-type ATPase, V1 domain=>vatd_neucr ame: full=v-type proton atpase subunit d short=v-atpase subunit d ame: full=vacuolar proton pump subunit d GO:0002119=>nematode larval development=>vatd_neucr ame: full=v-type p…	IPR002699 (ATPase, V1/A1 complex, subunit D)	Subunit D of the eight-subunit V1 peripheral membrane domain of the vacuolar H+-ATPase (V-ATPase), an electrogenic proton pump found throughout the endomembrane system; plays a role in the coupling of proton transport and ATP hydrolysis
563	28	1	1	1	1	1	1	1	1	1	1	18	GO:0004197=>cysteine-type endopeptidase activity=>uchl3_mouse ame: full=ubiquitin carboxyl-terminal hydrolase isozyme l3 short=uch-l3 ame: full=ubiquitin thioesterase l3 GO:0004221=>ubiquitin thiolesterase activity=>uchl3_mouse ame: full=ubiquitin carboxyl-terminal hydrolase isozyme l3 short=uch-l3 ame: full=ubiquitin thioesterase l3 GO:0005730=>nucleolus=>uchl3_mouse ame: full=ubiquitin carboxyl…	IPR001578 (Peptidase C12, ubiquitin carboxyl-terminal hydrolase 1)	Ubiquitin C-terminal hydrolase that cleaves ubiquitin-protein fusions to generate monomeric ubiquitin; hydrolyzes the peptide bond at the C-terminus of ubiquitin; also the major processing enzyme for the ubiquitin-like protein Rub1p
564	28	2	1	1	1	1	1	2	1	1	1	16	GO:0000080=>G1 phase of mitotic cell cycle=>skp1_aspfu ame: full=e3 ubiquitin ligase complex scf subunit sconc ame: full=sulfur controller c ame: full=sulfur metabolite repression control protein c GO:0000082=>G1/S transition of mitotic cell cycle=>skp1_aspfu ame: full=e3 ubiquitin ligase complex scf subunit sconc ame: full=sulfur controller c ame: full=sulfur metabolite repression control protei…	IPR001232 (SKP1 component)	Evolutionarily conserved kinetochore protein that is part of multiple protein complexes, including the SCF ubiquitin ligase complex, the CBF3 complex that binds centromeric DNA, and the RAVE complex that regulates assembly of the V-ATPase
565	28	2	1	1	2	1	1	1	1	1	1	16	GO:0005215=>transporter activity=>ap1s2_dicdi ame: full=ap-1 complex subunit sigma-2 ame: full=adapter-related protein complex 1 sigma-1b subunit ame: full=adaptor protein complex ap-1 sigma-1b subunit ame: full=clathrin assembly protein complex 1 sigma-1b small chain ame: full=sigma 1b subunit of ap-1 clathrin ame: full=sigma-adaptin 1b ame: full=sigma1b-adaptin GO:0005515=>protein binding=>ap1s…	IPR000804 (Clathrin adaptor complex, small chain IPR016635 (Adaptor protein complex, sigma subunit) IPR016635 (Adaptor protein complex, sigma subunit)	Small subunit of the clathrin-associated adaptor complex AP-1, which is involved in protein sorting at the trans-Golgi network; homolog of the sigma subunit of the mammalian clathrin AP-1 complex
566	28	2	1	2	2	1	1	4	2	2	2	9	GO:0000278=>mitotic cell cycle=>sur8_culqu ame: full=leucine-rich repeat protein soc-2 homolog ame: full=protein sur-8 homolog ame: full=protein soc-2 homolog GO:0001841=>neural tube formation=>sur8_culqu ame: full=leucine-rich repeat protein soc-2 homolog ame: full=protein sur-8 homolog ame: full=protein soc-2 homolog GO:0005911=>cell-cell junction=>sur8_culqu ame: full=leucine-rich repeat prote…	IPR001611 (Leucine-rich repeat IPR003591 (Leucine-rich repeat, typical subtype) IPR000159 (Ras-association	Adenylate cyclase, required for cAMP production and cAMP-dependent protein kinase signaling; the cAMP pathway controls a variety of cellular processes, including metabolism, cell cycle, stress response, stationary phase, and sporulation
567	28	1	1	1	1	1	1	1	1	1	1	18	GO:0004807=>triose-phosphate isomerase activity=>tpis_neucr ame: full=triosephosphate isomerase short=tim ame: full=triose-phosphate isomerase GO:0005739=>mitochondrion=>tpis_neucr ame: full=triosephosphate isomerase short=tim ame: full=triose-phosphate isomerase GO:0005829=>cytosol=>tpis_neucr ame: full=triosephosphate isomerase short=tim ame: full=triose-phosphate isomerase GO:0006094=>gluconeo…	IPR000652 (Triosephosphate isomerase IPR013785 (Aldolase-type TIM barrel)	Triose phosphate isomerase, abundant glycolytic enzyme; mRNA half-life is regulated by iron availability; transcription is controlled by activators Reb1p, Gcr1p, and Rap1p through binding sites in the 5' non-coding region
568	28	1	1	1	1	1	1	1	1	1	1	18	GO:0000082=>G1/S transition of mitotic cell cycle=>erf3_klula ame: full=eukaryotic peptide chain release factor gtp-binding subunit ame: full=erf-3 short=erf3 ame: full=erf2 ame: full=polypeptide release factor 3 ame: full=translation release factor 3 GO:0000184=>nuclear-transcribed mRNA catabolic process, nonsense-mediated decay=>erf3_klula ame: full=eukaryotic peptide chain release factor gtp-b…	IPR003285 (Yeast eukaryotic release factor IPR009000 (Translation elongation/initiation factor/Ribosomal, beta-barrel	Translation termination factor eRF3, has a role in mRNA deadenylation and decay; altered protein conformation creates the [PSI(+)] prion that alters translational fidelity and results in a nonsense suppressor phenotype
569	28	1	1	1	1	1	1	2	1	0	1	18	GO:0004777=>succinate-semialdehyde dehydrogenase (NAD+) activity=>ssdh1_schpo ame: full= succinate-semialdehyde dehydrogenase short=ssdh GO:0005759=>mitochondrial matrix=>ssdh1_schpo ame: full= succinate-semialdehyde dehydrogenase short=ssdh GO:0006006=>glucose metabolic process=>ssdh1_schpo ame: full= succinate-semialdehyde dehydrogenase short=ssdh GO:0006083=>acetate metabolic process=>ssdh1_sc…	IPR010102 (Succinic semialdehyde dehydrogenase IPR016161 (Aldehyde/histidinol dehydrogenase)	Succinate semialdehyde dehydrogenase involved in the utilization of gamma-aminobutyrate (GABA) as a nitrogen source; part of the 4-aminobutyrate and glutamate degradation pathways; localized to the cytoplasm
570	28	1	1	1	1	1	1	1	1	1	1	18	GO:0005737=>cytoplasm=>trm5_batdj ame: full=trna (guanine -n1)-methyltransferase ame: full=m1g-methyltransferase ame: full=trna methyltransferase ame: full=trna methyltransferase 5 GO:0008152=>metabolic process=>trm5_batdj ame: full=trna (guanine -n1)-methyltransferase ame: full=m1g-methyltransferase ame: full=trna methyltransferase ame: full=trna methyltransferase 5 GO:0008168=>methyltransferase…	IPR003402 (Protein of unknown function Met10)	tRNA(m(1)G37)methyltransferase, methylates a tRNA base adjacent to the anticodon that has a role in prevention of frameshifting; highly conserved across Archaea, Bacteria, and Eukarya
571	28	1	1	1	1	1	1	1	1	1	1	18	GO:0005768=>endosome=>chm2a_xentr ame: full=charged multivesicular body protein 2a ame: full=chromatin-modifying protein 2a short=chmp2a GO:0005829=>cytosol=>chm2a_xentr ame: full=charged multivesicular body protein 2a ame: full=chromatin-modifying protein 2a short=chmp2a GO:0016020=>membrane=>chm2a_xentr ame: full=charged multivesicular body protein 2a ame: full=chromatin-modifying protein 2a sh…	IPR005024 (Snf7)	Class E Vps protein of the ESCRT-III complex, required for sorting of integral membrane proteins into lumenal vesicles of multivesicular bodies, and for delivery of newly synthesized vacuolar enzymes to the vacuole, involved in endocytosis
572	28	0	1	1	1	1	1	2	1	1	1	18			Beta 1 subunit of the 20S proteasome, responsible for cleavage after acidic residues in peptides
573	28	1	1	1	1	1	1	1	1	1	1	18	GO:0005634=>nucleus=>utp25_colgm ame: full=u3 small nucleolar rna-associated protein 25 short=u3 snorna-associated protein 25 ame: full=u three protein 25 GO:0007275=>multicellular organismal development=>utp25_colgm ame: full=u3 small nucleolar rna-associated protein 25 short=u3 snorna-associated protein 25 ame: full=u three protein 25)	IPR010678 (Digestive organ expansion factor, predicted)	Nucleolar protein required for 35S pre-RNA processing and 40S ribosomal subunit biogenesis; contains a DEAD-box RNA helicase-like motif
574	28	1	2	1	1	1	1	4	3	1	1	12	GO:0000022=>mitotic spindle elongation=>rl371_drome ame: full=probable 60s ribosomal protein l37-a GO:0000184=>nuclear-transcribed mRNA catabolic process, nonsense-mediated decay=>rl371_drome ame: full=probable 60s ribosomal protein l37-a GO:0001510=>RNA methylation=>rl371_drome ame: full=probable 60s ribosomal protein l37-a GO:0002119=>nematode larval development=>rl371_drome ame: full=probable …	IPR001569 (Ribosomal protein L37e IPR011332 (Ribosomal protein, zinc-binding domain)	Protein component of the large (60S) ribosomal subunit, has similarity to Rpl37Ap and to rat L37 ribosomal protein Protein component of the large (60S) ribosomal subunit, has similarity to Rpl37Bp and to rat L37 ribosomal protein
575	28	1	2	1	1	1	1	2	1	1	1	16	GO:0005488=>binding=>frds_schpo ame: full= fumarate reductase ame: full=fad-dependent oxidoreductase frds ame: full=nadh ame: full=nadh-dependent fumarate reductase GO:0005622=>intracellular=>frds_schpo ame: full= fumarate reductase ame: full=fad-dependent oxidoreductase frds ame: full=nadh ame: full=nadh-dependent fumarate reductase GO:0016491=>oxidoreductase activity=>frds_schpo ame: full= fuma…	IPR001199 (Cytochrome b5 IPR010960 (Flavocytochrome c)	Soluble fumarate reductase, required with isoenzyme Osm1p for anaerobic growth; may interact with ribosomes, based on co-purification experiments; authentic, non-tagged protein is detected in purified mitochondria in high-throughput studies Fumarate reductase, catalyzes the reduction of fumarate to succinate, required for the reoxidation of intracellular NADH under anaerobic conditions; mutations…
576	28	1	1	1	1	1	1	2	1	1	1	17	GO:0003684=>damaged DNA binding=>ruvb2_xenla ame: full= -like 2 ame: full=reptin GO:0003714=>transcription corepressor activity=>ruvb2_xenla ame: full= -like 2 ame: full=reptin GO:0004003=>ATP-dependent DNA helicase activity=>ruvb2_xenla ame: full= -like 2 ame: full=reptin GO:0004402=>histone acetyltransferase activity=>ruvb2_xenla ame: full= -like 2 ame: full=reptin GO:0005524=>ATP binding=>ruvb…	IPR003593 (ATPase, AAA+ type, core IPR010339 (TIP49, C-terminal	Essential protein involved in transcription regulation; component of chromatin remodeling complexes; required for assembly and function of the INO80 complex; also referred to as reptin; member of the RUVB-like protein family
577	28	1	1	1	0	1	1	2	1	1	1	18	GO:0003963=>RNA-3'-phosphate cyclase activity=>rcl1_dicdi ame: full=probable rna 3 -terminal phosphate cyclase-like protein GO:0005730=>nucleolus=>rcl1_dicdi ame: full=probable rna 3 -terminal phosphate cyclase-like protein GO:0006364=>rRNA processing=>rcl1_dicdi ame: full=probable rna 3 -terminal phosphate cyclase-like protein)	IPR000228 (RNA 3'-terminal phosphate cyclase-like)	Subunit of U3-containing 90S preribosome processome complex involved in 18S rRNA biogenesis and small ribosomal subunit assembly; stimulates Bms1p GTPase and U3 binding activity; similar to RNA cyclase-like proteins but no activity detected
578	28	1	1	1	1	1	1	1	1	1	1	18	GO:0004642=>phosphoribosylformylglycinamidine synthase activity=>pur4_schpo ame: full=probable phosphoribosylformylglycinamidine synthase short=fgam synthase short=fgams ame: full=formylglycinamide ribotide amidotransferase short=fgarat ame: full=formylglycinamide ribotide synthetase GO:0009152=>purine ribonucleotide biosynthetic process=>pur4_schpo ame: full=probable phosphoribosylformylglycinam…	IPR010073 (Phosphoribosylformylglycinamidine synthase IPR016188 (PurM, N-terminal-like)	Formylglycinamidine-ribonucleotide (FGAM)-synthetase, catalyzes a step in the 'de novo' purine nucleotide biosynthetic pathway
579	28	1	1	1	1	1	1	2	2	1	1	16	GO:0001701=>in utero embryonic development=>dcam_schpo ame: full=s-adenosylmethionine decarboxylase proenzyme short= etdc short=samdc contains: ame: full=s-adenosylmethionine decarboxylase alpha chain contains: ame: full=s-adenosylmethionine decarboxylase beta chain flags: precursor GO:0004014=>adenosylmethionine decarboxylase activity=>dcam_schpo ame: full=s-adenosylmethionine decarboxylase proe…	IPR016067 (S-adenosylmethionine decarboxylase, core)	S-adenosylmethionine decarboxylase, required for the biosynthesis of spermidine and spermine; cells lacking Spe2p require spermine or spermidine for growth in the presence of oxygen but not when grown anaerobically
580	28	1	1	1	1	1	1	1	1	1	1	18	GO:0005525=>GTP binding=>gpn3_ustma ame: full=gpn-loop gtpase 3 homolog um01243 GO:0043234=>protein complex=>gpn3_ustma ame: full=gpn-loop gtpase 3 homolog um01243)	IPR004130 (Uncharacterised protein family, ATP binding)	Putative protein of unknown function; YLR243W is an essential gene
581	28	1	1	1	1	1	1	1	1	1	1	18	GO:0000003=>reproduction=>rpf2_mouse ame: full=ribosome production factor 2 homolog ame: full=brix domain-containing protein 1 ame: full=ribosome biogenesis protein rpf2 homolog GO:0005730=>nucleolus=>rpf2_mouse ame: full=ribosome production factor 2 homolog ame: full=brix domain-containing protein 1 ame: full=ribosome biogenesis protein rpf2 homolog)	IPR007109 (Brix domain)	Essential protein involved in the processing of pre-rRNA and the assembly of the 60S ribosomal subunit; interacts with ribosomal protein L11; localizes predominantly to the nucleolus; constituent of 66S pre-ribosomal particles
582	28	1	1	1	1	1	1	1	1	1	1	18	GO:0005524=>ATP binding=>atm1_aspor ame: full=iron-sulfur clusters transporter mitochondrial flags: precursor GO:0005743=>mitochondrial inner membrane=>atm1_aspor ame: full=iron-sulfur clusters transporter mitochondrial flags: precursor GO:0006200=>ATP catabolic process=>atm1_aspor ame: full=iron-sulfur clusters transporter mitochondrial flags: precursor GO:0006777=>Mo-molybdopterin cofactor bios…	IPR003593 (ATPase, AAA+ type, core IPR011527 (ABC transporter, transmembrane domain, type 1)	Mitochondrial inner membrane ATP-binding cassette (ABC) transporter, exports mitochondrially synthesized precursors of iron-sulfur (Fe/S) clusters to the cytosol
583	28	2	2	2	2	2	2	2	2	2	2	8	GO:0004523=>ribonuclease H activity=>rnh2a_bovin ame: full=ribonuclease h2 subunit a short=rnase h2 subunit a ame: full=ribonuclease hi large subunit short=rnase hi large subunit ame: full=ribonuclease hi subunit a GO:0005488=>binding=>rnh2a_bovin ame: full=ribonuclease h2 subunit a short=rnase h2 subunit a ame: full=ribonuclease hi large subunit short=rnase hi large subunit ame: full=ribonucleas…	IPR001352 (Ribonuclease HII/HIII IPR012337 (Ribonuclease H-like IPR005024 (Snf7)	Ribonuclease H2 catalytic subunit, removes RNA primers during Okazaki fragment synthesis and errant ribonucleotides misincorporated during DNA replication; homolog of RNAse HI; related to human AGS4 which causes Aicardi-Goutieres syndrome One of four subunits of the endosomal sorting complex required for transport III (ESCRT-III); forms an ESCRT-III subcomplex with Did4p; involved in the sorting …
584	28	1	1	1	1	1	1	3	3	1	1	14	GO:0000288=>nuclear-transcribed mRNA catabolic process, deadenylation-dependent decay=>cnot1_mouse ame: full=ccr4-not transcription complex subunit 1 ame: full=ccr4-associated factor 1 GO:0005515=>protein binding=>cnot1_mouse ame: full=ccr4-not transcription complex subunit 1 ame: full=ccr4-associated factor 1 GO:0005778=>peroxisomal membrane=>cnot1_mouse ame: full=ccr4-not transcription complex …	IPR007196 (CCR4-Not complex component, Not1)	Component of the CCR4-NOT complex, which has multiple roles in regulating mRNA levels including regulation of transcription and destabilizing mRNAs by deadenylation; basal transcription factor
585	28	0	0	0	0	0	0	28	0	0	0	0
586	28	28	0	0	0	0	0	0	0	0	0	0		IPR013761 (Sterile alpha motif-type)
587	28	0	0	0	0	28	0	0	0	0	0	0
588	27	2	2	2	2	3	1	3	3	2	2	5	GO:0006508=>proteolysis=>clpb1_arath ame: full=chaperone protein 1 ame: full=atp-dependent clp protease atp-binding subunit homolog 1 ame: full=casein lytic proteinase b1 ame: full=heat shock protein 101 GO:0008233=>peptidase activity=>clpb1_arath ame: full=chaperone protein 1 ame: full=atp-dependent clp protease atp-binding subunit homolog 1 ame: full=casein lytic proteinase b1 ame: full=heat sh…	IPR001270 (Chaperonin ClpA/B IPR003593 (ATPase, AAA+ type, core	Oligomeric mitochondrial matrix chaperone that cooperates with Ssc1p in mitochondrial thermotolerance after heat shock; able to prevent the aggregation of misfolded proteins as well as resolubilize protein aggregates Heat shock protein that cooperates with Ydj1p (Hsp40) and Ssa1p (Hsp70) to refold and reactivate previously denatured, aggregated proteins; responsive to stresses including: heat, et…
589	27	6	0	0	0	5	0	0	0	16	0	0	GO:0005488=>binding=>chk1_drome ame: full=serine threonine-protein kinase grp ame: full=chk1 homolog ame: full=protein grapes GO:0016301=>kinase activity=>chk1_drome ame: full=serine threonine-protein kinase grp ame: full=chk1 homolog ame: full=protein grapes GO:0043232=>intracellular non-membrane-bounded organelle=>chk1_drome ame: full=serine threonine-protein kinase grp ame: full=chk1 homolog a…	IPR011009 (Protein kinase-like domain) IPR013761 (Sterile alpha motif-type) IPR013761 (Sterile alpha motif-type
590	27	1	1	1	1	1	0	1	1	1	1	18	GO:0002119=>nematode larval development=>mpcp_schpo ame: full=probable mitochondrial phosphate carrier protein GO:0005743=>mitochondrial inner membrane=>mpcp_schpo ame: full=probable mitochondrial phosphate carrier protein GO:0005887=>integral to plasma membrane=>mpcp_schpo ame: full=probable mitochondrial phosphate carrier protein GO:0006091=>generation of precursor metabolites and energy=>mpcp_…	IPR001993 (Mitochondrial substrate carrier)	Mitochondrial phosphate carrier, imports inorganic phosphate into mitochondria; functionally redundant with Mir1p but less abundant than Mir1p under normal conditions; expression is induced at high temperature
591	27	27	0	0	0	0	0	0	0	0	0	0	GO:0001819=>positive regulation of cytokine production=>ybeq_ecoli ame: full=uncharacterized protein GO:0002224=>toll-like receptor signaling pathway=>ybeq_ecoli ame: full=uncharacterized protein GO:0004674=>protein serine/threonine kinase activity=>ybeq_ecoli ame: full=uncharacterized protein GO:0005856=>cytoskeleton=>ybeq_ecoli ame: full=uncharacterized protein GO:0006355=>regulation of transcr…
592	27	21	0	0	0	5	0	1	0	0	0	0		IPR004330 (Transcription factor, FAR1-related IPR007527 (Zinc finger, SWIM-type IPR018289 (MULE transposase, conserved domain) IPR007527 (Zinc finger, SWIM-type)
593	27	2	1	1	0	1	1	1	1	2	1	16	GO:0032502=>developmental process=>pns1_gibze ame: full=protein pns1 GO:0044699=>single-organism process=>pns1_gibze ame: full=protein pns1)	IPR007603 (Choline transporter-like)	Protein of unknown function; has similarity to Torpedo californica tCTL1p, which is postulated to be a choline transporter, neither null mutation nor overexpression affects choline transport
594	27	14	0	0	0	12	0	0	0	0	1	0
595	27	6	1	2	2	4	2	4	2	1	3	0	GO:0005773=>vacuole=>vcx1_schpo ame: full=vacuolar calcium ion transporter ame: full=vacuolar ca(2+) h(+) exchanger GO:0006812=>cation transport=>vcx1_schpo ame: full=vacuolar calcium ion transporter ame: full=vacuolar ca(2+) h(+) exchanger GO:0015491=>cation:cation antiporter activity=>vcx1_schpo ame: full=vacuolar calcium ion transporter ame: full=vacuolar ca(2+) h(+) exchanger GO:0016020=>memb…	IPR004798 (Calcium/proton exchanger superfamily)	Vacuolar membrane antiporter with Ca2+/H+ and K+/H+ exchange activity, involved in control of cytosolic Ca2+ and K+ concentrations; has similarity to sodium/calcium exchangers, including the bovine Na+/Ca2+,K+ antiporter
596	27	3	2	2	2	4	1	3	2	2	2	4		IPR010658 (Nodulin-like IPR016196 (Major facilitator superfamily, general substrate transporter)	Putative protein of unknown function; identified as interacting with Hsp82p in a high-throughput two-hybrid screen Protein with similarity to mammalian monocarboxylate permeases, which are involved in transport of monocarboxylic acids across the plasma membrane; mutant is not deficient in monocarboxylate transport
597	27	27	0	0	0	0	0	0	0	0	0	0		IPR002035 (von Willebrand factor, type A IPR008803 (Root hair defective 3 GTP-binding) IPR008803 (Root hair defective 3 GTP-binding)
598	27	27	0	0	0	0	0	0	0	0	0	0	GO:0005488=>binding=>pogk_human ame: full=pogo transposable element with krab domain GO:0009987=>cellular process=>pogk_human ame: full=pogo transposable element with krab domain GO:0044424=>intracellular part=>pogk_human ame: full=pogo transposable element with krab domain)	IPR004875 (DDE superfamily endonuclease, CENP-B-like IPR009057 (Homeodomain-like) IPR009057 (Homeodomain-like) IPR006695 (Centromere protein Cenp-B, DNA-binding domain 1
599	27	25	0	0	1	1	0	0	0	0	0	0		IPR011579 (ATPase domain, prokaryote)
600	27	4	0	0	0	1	0	13	9	0	0	0	GO:0001676=>long-chain fatty acid metabolic process=>cp4d8_drome ame: full=cytochrome p450 4d8 ame: full=cypivd8 GO:0005488=>binding=>cp4d8_drome ame: full=cytochrome p450 4d8 ame: full=cypivd8 GO:0005783=>endoplasmic reticulum=>cp4d8_drome ame: full=cytochrome p450 4d8 ame: full=cypivd8 GO:0006636=>unsaturated fatty acid biosynthetic process=>cp4d8_drome ame: full=cytochrome p450 4d8 ame: full=c…	IPR001128 (Cytochrome P450)
601	27	27	0	0	0	0	0	0	0	0	0	0
602	27	2	0	0	0	0	0	0	25	0	0	0	GO:0005515=>protein binding=>klhl7_chick ame: full=kelch-like protein 7 GO:0031981=>nuclear lumen=>klhl7_chick ame: full=kelch-like protein 7 GO:0043232=>intracellular non-membrane-bounded organelle=>klhl7_chick ame: full=kelch-like protein 7 GO:0044267=>cellular protein metabolic process=>klhl7_chick ame: full=kelch-like protein 7 GO:0044444=>cytoplasmic part=>klhl7_chick ame: full=kelch-like pr…	IPR008974 (TRAF-like IPR011333 (BTB/POZ fold
603	27	2	1	1	1	1	1	1	2	1	1	15	GO:0000049=>tRNA binding=>sykc_schpo ame: full=lysine--trna cytoplasmic ame: full=lysyl-trna synthetase short= GO:0000085=>G2 phase of mitotic cell cycle=>sykc_schpo ame: full=lysine--trna cytoplasmic ame: full=lysyl-trna synthetase short= GO:0002119=>nematode larval development=>sykc_schpo ame: full=lysine--trna cytoplasmic ame: full=lysyl-trna synthetase short= GO:0004824=>lysine-tRNA ligase ac…	IPR018150 (Aminoacyl-tRNA synthetase, class II (D/K/N)-like)	Lysyl-tRNA synthetase
604	27	1	0	1	2	4	0	2	3	1	1	12	GO:0000188=>inactivation of MAPK activity=>mpl1_dicdi ame: full=map kinase phosphatase with leucine-rich repeats protein 1 GO:0005516=>calmodulin binding=>mpl1_dicdi ame: full=map kinase phosphatase with leucine-rich repeats protein 1 GO:0005634=>nucleus=>mpl1_dicdi ame: full=map kinase phosphatase with leucine-rich repeats protein 1 GO:0005737=>cytoplasm=>mpl1_dicdi ame: full=map kinase phosphat…	IPR000340 (Dual specificity phosphatase, catalytic domain)
605	27	0	0	0	0	27	0	0	0	0	0	0
606	27	0	0	0	0	27	0	0	0	0	0	0
607	27	1	1	1	1	17	1	1	1	1	1	1	GO:0000045=>autophagic vacuole assembly=>atg3_bovin ame: full=ubiquitin-like-conjugating enzyme atg3 ame: full=autophagy-related protein 3 short=apg3-like GO:0000153=>cytoplasmic ubiquitin ligase complex=>atg3_bovin ame: full=ubiquitin-like-conjugating enzyme atg3 ame: full=autophagy-related protein 3 short=apg3-like GO:0005829=>cytosol=>atg3_bovin ame: full=ubiquitin-like-conjugating enzyme atg3…	IPR007134 (Autophagy-related protein 3, N-terminal IPR007135 (Autophagy-related protein 3	E2-like enzyme involved in autophagy and the cytoplasm-to-vacuole targeting (Cvt) pathway; plays a role in formation of Atg8p-phosphatidylethanolamine conjugates, which are involved in membrane dynamics during autophagy and Cvt
608	27	1	2	2	2	3	2	2	2	1	2	8	GO:0005488=>binding=>lac1_schpo ame: full=sphingosine n-acyltransferase lac1 ame: full=meiotically up-regulated gene 83 protein GO:0005783=>endoplasmic reticulum=>lac1_schpo ame: full=sphingosine n-acyltransferase lac1 ame: full=meiotically up-regulated gene 83 protein GO:0016020=>membrane=>lac1_schpo ame: full=sphingosine n-acyltransferase lac1 ame: full=meiotically up-regulated gene 83 protein …	IPR016439 (Longevity assurance, LAG1/LAC1)	Ceramide synthase component, involved in synthesis of ceramide from C26(acyl)-coenzyme A and dihydrosphingosine or phytosphingosine, functionally equivalent to Lac1p Ceramide synthase component, involved in synthesis of ceramide from C26(acyl)-coenzyme A and dihydrosphingosine or phytosphingosine, functionally equivalent to Lag1p
609	27	1	0	2	1	1	1	0	0	0	3	18	GO:0003824=>catalytic activity=>fahd2_xenla ame: full=fumarylacetoacetate hydrolase domain-containing protein 2 GO:0005739=>mitochondrion=>fahd2_xenla ame: full=fumarylacetoacetate hydrolase domain-containing protein 2)	IPR011234 (Fumarylacetoacetase, C-terminal-related)
610	27	0	0	0	0	0	0	0	0	1	0	26
611	27	1	1	1	1	1	0	1	1	1	1	18	GO:0000152=>nuclear ubiquitin ligase complex=>aapk2_ponab ame: full=5 -amp-activated protein kinase catalytic subunit alpha-2 short=ampk subunit alpha-2 ame: full=acetyl- carboxylase kinase short=acaca kinase ame: full=hydroxymethylglutaryl- reductase kinase short=hmgcr kinase GO:0003006=>developmental process involved in reproduction=>aapk2_ponab ame: full=5 -amp-activated protein kinase catalyt…	IPR015940 (Ubiquitin-associated/translation elongation factor EF1B, N-terminal, eukaryote IPR020636 (Calcium/calmodulin-dependent protein kinase-like)	AMP-activated serine/threonine protein kinase found in a complex containing Snf4p and members of the Sip1p/Sip2p/Gal83p family; required for transcription of glucose-repressed genes, thermotolerance, sporulation, and peroxisome biogenesis
612	27	0	0	0	0	0	0	0	0	0	0	27
613	27	2	1	1	1	1	1	2	1	1	1	15	GO:0000303=>response to superoxide=>slt2_yeast ame: full=mitogen-activated protein kinase slt2 mpk1 short=map kinase mpk1 GO:0000751=>cell cycle arrest in response to pheromone=>slt2_yeast ame: full=mitogen-activated protein kinase slt2 mpk1 short=map kinase mpk1 GO:0002755=>MyD88-dependent toll-like receptor signaling pathway=>slt2_yeast ame: full=mitogen-activated protein kinase slt2 mpk1 short…	IPR011009 (Protein kinase-like domain)	Serine/threonine MAP kinase; involved in regulating maintenance of cell wall integrity, progression through the cell cycle, and nuclear mRNA retention in heat shock; required for mitophagy and pexophagy; affects recruitment of mitochondria to the phagophore assembly site (PAS); regulated by the PKC1-mediated signaling pathway
614	27	0	1	0	0	0	0	0	0	0	0	26			Minus-end-directed microtubule motor that functions in mitosis and meiosis, localizes to the spindle pole body and localization is dependent on functional Cik1p, required for nuclear fusion during mating; potential Cdc28p substrate
615	27	1	0	1	2	1	1	2	1	1	1	16	GO:0000184=>nuclear-transcribed mRNA catabolic process, nonsense-mediated decay=>eif3e_cocim ame: full=eukaryotic translation initiation factor 3 subunit e short=eif3e GO:0000785=>chromatin=>eif3e_cocim ame: full=eukaryotic translation initiation factor 3 subunit e short=eif3e GO:0003743=>translation initiation factor activity=>eif3e_cocim ame: full=eukaryotic translation initiation factor 3 subu…	IPR016650 (Translation initiation factor 3, subunit 6, eukaryotic)
616	27	1	1	1	1	1	0	1	1	1	1	18	GO:0009086=>methionine biosynthetic process=>mtna_pyrtr ame: full=methylthioribose-1-phosphate isomerase short=m1pi short=mtr-1-p isomerase ame: full=s-methyl-5-thioribose-1-phosphate isomerase ame: full=translation initiation factor eif-2b subunit alpha beta delta-like protein GO:0016853=>isomerase activity=>mtna_pyrtr ame: full=methylthioribose-1-phosphate isomerase short=m1pi short=mtr-1-p iso…	IPR000649 (Initiation factor 2B-related)	5'-methylthioribose-1-phosphate isomerase; catalyzes the isomerization of 5-methylthioribose-1-phosphate to 5-methylthioribulose-1-phosphate in the methionine salvage pathway
617	27	1	1	1	1	1	1	1	1	0	1	18	GO:0003743=>translation initiation factor activity=>ei2ba_schpo ame: full=translation initiation factor eif-2b subunit alpha ame: full=eif-2b gdp-gtp exchange factor subunit alpha GO:0005085=>guanyl-nucleotide exchange factor activity=>ei2ba_schpo ame: full=translation initiation factor eif-2b subunit alpha ame: full=eif-2b gdp-gtp exchange factor subunit alpha GO:0005515=>protein binding=>ei2ba_…	IPR000649 (Initiation factor 2B-related)	Alpha subunit of the translation initiation factor eIF2B, the guanine-nucleotide exchange factor for eIF2; activity subsequently regulated by phosphorylated eIF2; first identified as a positive regulator of GCN4 expression
618	27	1	1	1	1	0	1	2	2	1	1	16	GO:0000287=>magnesium ion binding=>kpr1_yeast ame: full=ribose-phosphate pyrophosphokinase 1 ame: full=phosphoribosyl pyrophosphate synthase 1 GO:0002189=>ribose phosphate diphosphokinase complex=>kpr1_yeast ame: full=ribose-phosphate pyrophosphokinase 1 ame: full=phosphoribosyl pyrophosphate synthase 1 GO:0004749=>ribose phosphate diphosphokinase activity=>kpr1_yeast ame: full=ribose-phosphate p…	IPR005946 (Phosphoribosyl pyrophosphokinase)	5-phospho-ribosyl-1(alpha)-pyrophosphate synthetase, synthesizes PRPP, which is required for nucleotide, histidine, and tryptophan biosynthesis; one of five related enzymes, which are active as heteromultimeric complexes
619	27	1	0	1	1	1	1	1	1	1	1	18	GO:0008152=>metabolic process=>nduf5_danre ame: full=nadh dehydrogenase 1 alpha subcomplex assembly factor 5 ame: full=probable methyltransferase c20orf7 mitochondrial flags: precursor GO:0016787=>hydrolase activity=>nduf5_danre ame: full=nadh dehydrogenase 1 alpha subcomplex assembly factor 5 ame: full=probable methyltransferase c20orf7 mitochondrial flags: precursor GO:0031314=>extrinsic to mit…	IPR013216 (Methyltransferase type 11)
620	27	1	0	1	1	1	1	1	1	1	1	18	GO:0005515=>protein binding=>ndus3_neucr ame: full=nadh-ubiquinone oxidoreductase kda mitochondrial ame: full=ci-31kd ame: full=complex i-30kd flags: precursor GO:0005747=>mitochondrial respiratory chain complex I=>ndus3_neucr ame: full=nadh-ubiquinone oxidoreductase kda mitochondrial ame: full=ci-31kd ame: full=complex i-30kd flags: precursor GO:0006120=>mitochondrial electron transport, NADH to…	IPR001268 (NADH:ubiquinone oxidoreductase, 30kDa subunit IPR010218 (NADH dehydrogenase, subunit C)
621	27	1	1	1	1	1	0	1	1	1	1	18	GO:0002119=>nematode larval development=>vato_schpo ame: full=probable v-type proton atpase 20 kda proteolipid subunit short=v-atpase 20 kda proteolipid subunit ame: full=vacuolar proton pump 20 kda proteolipid subunit GO:0006879=>cellular iron ion homeostasis=>vato_schpo ame: full=probable v-type proton atpase 20 kda proteolipid subunit short=v-atpase 20 kda proteolipid subunit ame: full=vacuola…	IPR002379 (ATPase, F0/V0 complex, subunit C)	Subunit c'' of the vacuolar ATPase, which functions in acidification of the vacuole; one of three proteolipid subunits of the V0 domain
622	27	1	1	1	1	1	1	2	1	1	1	16	GO:0003735=>structural constituent of ribosome=>rm23_yeast ame: full=54s ribosomal protein mitochondrial ame: full= 23 flags: precursor GO:0006412=>translation=>rm23_yeast ame: full=54s ribosomal protein mitochondrial ame: full= 23 flags: precursor GO:0030529=>ribonucleoprotein complex=>rm23_yeast ame: full=54s ribosomal protein mitochondrial ame: full= 23 flags: precursor GO:0042254=>ribosome bi…	IPR005822 (Ribosomal protein L13)	Mitochondrial ribosomal protein of the large subunit
623	27	1	1	1	1	1	0	2	1	1	1	17	GO:0000089=>mitotic metaphase=>pesc_schpo ame: full=pescadillo homolog ame: full=nucleolar protein 7 homolog GO:0000793=>condensed chromosome=>pesc_schpo ame: full=pescadillo homolog ame: full=nucleolar protein 7 homolog GO:0005515=>protein binding=>pesc_schpo ame: full=pescadillo homolog ame: full=nucleolar protein 7 homolog GO:0006364=>rRNA processing=>pesc_schpo ame: full=pescadillo homolog am…	IPR001357 (BRCT IPR010613 (Pescadillo, N-terminal)	Component of several different pre-ribosomal particles; forms a complex with Ytm1p and Erb1p that is required for maturation of the large ribosomal subunit; required for exit from G<sub>0</sub> and the initiation of cell proliferation
[truncated: 18,677 more rows]
