# Supplementary material for: Single Nucleus Genome Sequencing Reveals High Similarity among Nuclei of an Endomycorrhizal Fungus
Source: PLoS Genet. 2014 Jan 9;10(1):e1004078. doi: 10.1371/journal.pgen.1004078 (PMC3886924; doi:10.1371/journal.pgen.1004078)
Supplement: Table S7 — List of annotated protein-coding genes unique for R. irregularis. GroupID corresponds with orthoMCL clusters in Table S5. GO = identifiers in Gene Ontology database (www.geneontology.org); PfamA = family domain identifiers in Pfam database (pfam.sanger.ac.uk); InterPro = domain identifiers in InterPro database (www.ebi.ac.uk/interpro). (XLSX) [file pgen.1004078.s014.xlsx]

## Sheet: Sheet1
Table S7. List of annotated protein-coding genes unique for R. irregularis.
GeneID	GroupID	GO	PfamA	InterPro
RirG178990	6	GO:0005488=>binding=>kbtb5_xentr ame: full=kelch repeat and btb domain-containing protein 5);	PF00651=>BTB/POZ domain;PF07534=>TLD;	IPR011333 (BTB/POZ fold; IPR013089 (Kelch-related)
RirG271920	6	GO:0009987=>cellular process=>kbtba_human ame: full=kelch repeat and btb domain-containing protein 10 ame: full=kel-like protein 23 ame: full=kelch-related protein 1 ame: full=sarcosin;GO:0043229=>intracellular organelle=>kbtba_human ame: full=kelch repeat and btb domain-containing protein 10 ame: full=kel-like protein 23 ame: full=kelch-related protein 1 ame: full=sarcosin);	PF00651=>BTB/POZ domain;PF07534=>TLD;PF07707=>BTB And C-terminal Kelch;	IPR011333 (BTB/POZ fold; IPR013089 (Kelch-related)
RirG192400	6	GO:0005488=>binding=>kbtba_human ame: full=kelch repeat and btb domain-containing protein 10 ame: full=kel-like protein 23 ame: full=kelch-related protein 1 ame: full=sarcosin;GO:0005737=>cytoplasm=>kbtba_human ame: full=kelch repeat and btb domain-containing protein 10 ame: full=kel-like protein 23 ame: full=kelch-related protein 1 ame: full=sarcosin;GO:0043232=>intracellular non-membrane-bounde…	PF00651=>BTB/POZ domain;PF07534=>TLD;PF07707=>BTB And C-terminal Kelch;	IPR011333 (BTB/POZ fold; IPR013089 (Kelch-related)
RirG255900	6		PF00651=>BTB/POZ domain;PF07534=>TLD;PF07707=>BTB And C-terminal Kelch;	IPR011333 (BTB/POZ fold; IPR013089 (Kelch-related)
RirG240730	6		PF00651=>BTB/POZ domain;PF07534=>TLD;PF07707=>BTB And C-terminal Kelch;	IPR011333 (BTB/POZ fold; IPR013089 (Kelch-related)
RirG206050	6	GO:0009987=>cellular process=>btbd9_bovin ame: full=btb poz domain-containing protein 9;GO:0032502=>developmental process=>btbd9_bovin ame: full=btb poz domain-containing protein 9;GO:0043229=>intracellular organelle=>btbd9_bovin ame: full=btb poz domain-containing protein 9;GO:0044707=>single-multicellular organism process=>btbd9_bovin ame: full=btb poz domain-containing protein 9);	PF00651=>BTB/POZ domain;PF07534=>TLD;PF07707=>BTB And C-terminal Kelch;	IPR011333 (BTB/POZ fold; IPR013089 (Kelch-related)
RirG218900	6		PF00651=>BTB/POZ domain;PF07534=>TLD;PF07707=>BTB And C-terminal Kelch;	IPR011333 (BTB/POZ fold; IPR013089 (Kelch-related)
RirG271900	6	GO:0043229=>intracellular organelle=>btbd2_human ame: full=btb poz domain-containing protein 2);	PF00651=>BTB/POZ domain;PF07534=>TLD;PF07707=>BTB And C-terminal Kelch;	IPR011333 (BTB/POZ fold; IPR013089 (Kelch-related)
RirG218910	6		PF00651=>BTB/POZ domain;PF07534=>TLD;PF07707=>BTB And C-terminal Kelch;	IPR011333 (BTB/POZ fold; IPR013089 (Kelch-related)
RirG243500	6		PF00651=>BTB/POZ domain;PF07534=>TLD;PF07707=>BTB And C-terminal Kelch;	IPR011333 (BTB/POZ fold; IPR013089 (Kelch-related)
RirG185310	6	GO:0009987=>cellular process=>btbd9_rat ame: full=btb poz domain-containing protein 9;GO:0044424=>intracellular part=>btbd9_rat ame: full=btb poz domain-containing protein 9);	PF00651=>BTB/POZ domain;PF07534=>TLD;PF07707=>BTB And C-terminal Kelch;	IPR006571 (TLDc; IPR011333 (BTB/POZ fold; IPR013089 (Kelch-related)
RirG206040	6		PF00651=>BTB/POZ domain;PF07534=>TLD;PF07707=>BTB And C-terminal Kelch;	IPR011333 (BTB/POZ fold; IPR013089 (Kelch-related)
RirG205620	6	GO:0005488=>binding=>zbt8a_rat ame: full=zinc finger and btb domain-containing protein 8a);	PF00651=>BTB/POZ domain;PF07534=>TLD;PF07707=>BTB And C-terminal Kelch;	IPR011333 (BTB/POZ fold; IPR013089 (Kelch-related)
RirG206060	6	GO:0043229=>intracellular organelle=>btbd9_bovin ame: full=btb poz domain-containing protein 9);	PF00651=>BTB/POZ domain;PF07534=>TLD;PF07707=>BTB And C-terminal Kelch;	IPR011333 (BTB/POZ fold; IPR013089 (Kelch-related)
RirG256440	6		PF00651=>BTB/POZ domain;PF07534=>TLD;PF07707=>BTB And C-terminal Kelch;	IPR011333 (BTB/POZ fold; IPR013089 (Kelch-related)
RirG201110	6	GO:0009987=>cellular process=>btbdh_xenla ame: full=btb poz domain-containing protein 17 flags: precursor;GO:0044424=>intracellular part=>btbdh_xenla ame: full=btb poz domain-containing protein 17 flags: precursor);	PF00651=>BTB/POZ domain;PF07534=>TLD;PF07707=>BTB And C-terminal Kelch;	IPR011333 (BTB/POZ fold; IPR013089 (Kelch-related)
RirG215050	6		PF00651=>BTB/POZ domain;PF07534=>TLD;PF07707=>BTB And C-terminal Kelch;	IPR011333 (BTB/POZ fold; IPR013089 (Kelch-related)
RirG223350	6		PF00651=>BTB/POZ domain;PF07534=>TLD;PF07707=>BTB And C-terminal Kelch;	IPR011333 (BTB/POZ fold; IPR013089 (Kelch-related)
RirG206100	6		PF00651=>BTB/POZ domain;PF07534=>TLD;PF07707=>BTB And C-terminal Kelch;	IPR011333 (BTB/POZ fold; IPR013089 (Kelch-related)
RirG188470	6		PF00651=>BTB/POZ domain;PF07534=>TLD;PF07707=>BTB And C-terminal Kelch;	IPR006571 (TLDc; IPR011333 (BTB/POZ fold; IPR013089 (Kelch-related)
RirG271910	6	GO:0005737=>cytoplasm=>btbd2_human ame: full=btb poz domain-containing protein 2;GO:0043232=>intracellular non-membrane-bounded organelle=>btbd2_human ame: full=btb poz domain-containing protein 2);	PF00651=>BTB/POZ domain;PF07534=>TLD;PF07707=>BTB And C-terminal Kelch;	IPR011333 (BTB/POZ fold; IPR013089 (Kelch-related)
RirG206080	6		PF00651=>BTB/POZ domain;PF07534=>TLD;PF07707=>BTB And C-terminal Kelch;	IPR011333 (BTB/POZ fold; IPR013089 (Kelch-related)
RirG198610	6	GO:0005488=>binding=>btbd9_rat ame: full=btb poz domain-containing protein 9;GO:0009987=>cellular process=>btbd9_rat ame: full=btb poz domain-containing protein 9;GO:0043229=>intracellular organelle=>btbd9_rat ame: full=btb poz domain-containing protein 9);	PF00651=>BTB/POZ domain;PF07534=>TLD;PF07707=>BTB And C-terminal Kelch;	IPR006571 (TLDc; IPR011333 (BTB/POZ fold; IPR013089 (Kelch-related)
RirG220260	6		PF00651=>BTB/POZ domain;PF07707=>BTB And C-terminal Kelch;	IPR011333 (BTB/POZ fold; IPR013089 (Kelch-related)
RirG271890	6	GO:0009987=>cellular process=>kbtba_human ame: full=kelch repeat and btb domain-containing protein 10 ame: full=kel-like protein 23 ame: full=kelch-related protein 1 ame: full=sarcosin;GO:0032502=>developmental process=>kbtba_human ame: full=kelch repeat and btb domain-containing protein 10 ame: full=kel-like protein 23 ame: full=kelch-related protein 1 ame: full=sarcosin;GO:0043229=>intracellula…	PF00651=>BTB/POZ domain;PF07534=>TLD;PF07707=>BTB And C-terminal Kelch;	IPR011333 (BTB/POZ fold; IPR013089 (Kelch-related)
RirG198010	6		PF00651=>BTB/POZ domain;PF07534=>TLD;PF07707=>BTB And C-terminal Kelch;	IPR011333 (BTB/POZ fold; IPR013089 (Kelch-related)
RirG199820	6	GO:0009987=>cellular process=>btbd9_rat ame: full=btb poz domain-containing protein 9;GO:0043229=>intracellular organelle=>btbd9_rat ame: full=btb poz domain-containing protein 9);	PF00651=>BTB/POZ domain;PF07534=>TLD;	IPR011333 (BTB/POZ fold; IPR013089 (Kelch-related)
RirG188460	6	GO:0009987=>cellular process=>btbd9_rat ame: full=btb poz domain-containing protein 9;GO:0044424=>intracellular part=>btbd9_rat ame: full=btb poz domain-containing protein 9);	PF00651=>BTB/POZ domain;PF07534=>TLD;PF07707=>BTB And C-terminal Kelch;	IPR011333 (BTB/POZ fold; IPR013089 (Kelch-related)
RirG213250	6		PF00651=>BTB/POZ domain;PF07534=>TLD;	IPR006571 (TLDc; IPR011333 (BTB/POZ fold; IPR013089 (Kelch-related)
RirG217820	6		PF00651=>BTB/POZ domain;PF07534=>TLD;PF07707=>BTB And C-terminal Kelch;	IPR011333 (BTB/POZ fold; IPR013089 (Kelch-related)
RirG206070	6	GO:0005488=>binding=>btbd9_rat ame: full=btb poz domain-containing protein 9;GO:0005622=>intracellular=>btbd9_rat ame: full=btb poz domain-containing protein 9;GO:0009987=>cellular process=>btbd9_rat ame: full=btb poz domain-containing protein 9;GO:0032502=>developmental process=>btbd9_rat ame: full=btb poz domain-containing protein 9);	PF00651=>BTB/POZ domain;PF07534=>TLD;PF07707=>BTB And C-terminal Kelch;	IPR011333 (BTB/POZ fold; IPR013089 (Kelch-related)
RirG215070	6		PF00651=>BTB/POZ domain;PF07534=>TLD;PF07707=>BTB And C-terminal Kelch;	IPR006571 (TLDc; IPR011333 (BTB/POZ fold; IPR013089 (Kelch-related)
RirG255890	6	GO:0005488=>binding=>zbt8a_rat ame: full=zinc finger and btb domain-containing protein 8a);	PF00651=>BTB/POZ domain;	IPR011333 (BTB/POZ fold; IPR013089 (Kelch-related)
RirG206030	6		PF00651=>BTB/POZ domain;PF07534=>TLD;PF07707=>BTB And C-terminal Kelch;	IPR011333 (BTB/POZ fold; IPR013089 (Kelch-related)
RirG197590	6		PF00651=>BTB/POZ domain;PF07534=>TLD;PF07707=>BTB And C-terminal Kelch;	IPR011333 (BTB/POZ fold; IPR013089 (Kelch-related)
RirG217830	6		PF00651=>BTB/POZ domain;PF07534=>TLD;PF07707=>BTB And C-terminal Kelch;	IPR011333 (BTB/POZ fold; IPR013089 (Kelch-related)
RirG256430	6		PF00651=>BTB/POZ domain;PF07534=>TLD;PF07707=>BTB And C-terminal Kelch;	IPR011333 (BTB/POZ fold; IPR013089 (Kelch-related)
RirG199810	6		PF00651=>BTB/POZ domain;PF07534=>TLD;	IPR006571 (TLDc; IPR011333 (BTB/POZ fold; IPR013089 (Kelch-related)
RirG194750	6	GO:0009987=>cellular process=>btbd9_rat ame: full=btb poz domain-containing protein 9;GO:0044424=>intracellular part=>btbd9_rat ame: full=btb poz domain-containing protein 9);	PF00651=>BTB/POZ domain;PF07534=>TLD;PF07707=>BTB And C-terminal Kelch;	IPR011333 (BTB/POZ fold; IPR013089 (Kelch-related)
RirG208280	6	GO:0009987=>cellular process=>btbd9_rat ame: full=btb poz domain-containing protein 9;GO:0044424=>intracellular part=>btbd9_rat ame: full=btb poz domain-containing protein 9);	PF00651=>BTB/POZ domain;PF07534=>TLD;PF07707=>BTB And C-terminal Kelch;	IPR011333 (BTB/POZ fold; IPR013089 (Kelch-related)
RirG205730	6	GO:0043229=>intracellular organelle=>btbd2_human ame: full=btb poz domain-containing protein 2);	PF00651=>BTB/POZ domain;PF00652=>Ricin-type beta-trefoil lectin domain;PF07534=>TLD;PF07707=>BTB And C-terminal Kelch;	IPR000772 (Ricin B lectin; IPR011333 (BTB/POZ fold; IPR013089 (Kelch-related)
RirG205720	6		PF00651=>BTB/POZ domain;PF00652=>Ricin-type beta-trefoil lectin domain;PF07534=>TLD;PF07707=>BTB And C-terminal Kelch;	IPR000772 (Ricin B lectin; IPR011333 (BTB/POZ fold; IPR013089 (Kelch-related)
RirG271880	6		PF00651=>BTB/POZ domain;PF07534=>TLD;	IPR011333 (BTB/POZ fold; IPR013089 (Kelch-related)
RirG217850	6		PF00651=>BTB/POZ domain;PF07534=>TLD;PF07707=>BTB And C-terminal Kelch;	IPR011333 (BTB/POZ fold; IPR013089 (Kelch-related)
RirG218860	6	GO:0005488=>binding=>btbd9_bovin ame: full=btb poz domain-containing protein 9;GO:0009987=>cellular process=>btbd9_bovin ame: full=btb poz domain-containing protein 9;GO:0043229=>intracellular organelle=>btbd9_bovin ame: full=btb poz domain-containing protein 9);	PF00651=>BTB/POZ domain;PF07534=>TLD;PF07707=>BTB And C-terminal Kelch;	IPR011333 (BTB/POZ fold; IPR013089 (Kelch-related)
RirG255910	6		PF00651=>BTB/POZ domain;PF07534=>TLD;PF07707=>BTB And C-terminal Kelch;	IPR011333 (BTB/POZ fold; IPR013089 (Kelch-related)
RirG214860	6		PF00651=>BTB/POZ domain;PF07534=>TLD;	IPR011333 (BTB/POZ fold; IPR013089 (Kelch-related)
RirG215060	6	GO:0009987=>cellular process=>btbd9_rat ame: full=btb poz domain-containing protein 9;GO:0043232=>intracellular non-membrane-bounded organelle=>btbd9_rat ame: full=btb poz domain-containing protein 9);	PF00651=>BTB/POZ domain;PF07534=>TLD;PF07707=>BTB And C-terminal Kelch;	IPR011333 (BTB/POZ fold; IPR013089 (Kelch-related)
RirG197580	6	GO:0005488=>binding=>btbd9_rat ame: full=btb poz domain-containing protein 9;GO:0009987=>cellular process=>btbd9_rat ame: full=btb poz domain-containing protein 9;GO:0044424=>intracellular part=>btbd9_rat ame: full=btb poz domain-containing protein 9);	PF00651=>BTB/POZ domain;PF07534=>TLD;PF07707=>BTB And C-terminal Kelch;	IPR006571 (TLDc; IPR011333 (BTB/POZ fold; IPR013089 (Kelch-related)
RirG214870	6		PF00569=>Zinc finger;ZZ type;PF00651=>BTB/POZ domain;PF07534=>TLD;	IPR000433 (Zinc finger, ZZ-type; IPR011333 (BTB/POZ fold; IPR013089 (Kelch-related)
RirG255090	6	GO:0009987=>cellular process=>kbtba_human ame: full=kelch repeat and btb domain-containing protein 10 ame: full=kel-like protein 23 ame: full=kelch-related protein 1 ame: full=sarcosin;GO:0043229=>intracellular organelle=>kbtba_human ame: full=kelch repeat and btb domain-containing protein 10 ame: full=kel-like protein 23 ame: full=kelch-related protein 1 ame: full=sarcosin);	PF00651=>BTB/POZ domain;PF07534=>TLD;	IPR011333 (BTB/POZ fold; IPR013089 (Kelch-related)
RirG260040	6		PF00651=>BTB/POZ domain;PF07534=>TLD;	IPR011333 (BTB/POZ fold; IPR013089 (Kelch-related)
RirG179710	6		PF00651=>BTB/POZ domain;PF07534=>TLD;PF07707=>BTB And C-terminal Kelch;	IPR011333 (BTB/POZ fold; IPR013089 (Kelch-related)
RirG240750	6		PF00651=>BTB/POZ domain;PF07534=>TLD;	IPR011333 (BTB/POZ fold; IPR013089 (Kelch-related)
RirG256420	6	GO:0009987=>cellular process=>kbtba_rat ame: full=kelch repeat and btb domain-containing protein 10 ame: full=kel-like protein 23 ame: full=kelch-related protein 1 ame: full=sarcosin;GO:0043229=>intracellular organelle=>kbtba_rat ame: full=kelch repeat and btb domain-containing protein 10 ame: full=kel-like protein 23 ame: full=kelch-related protein 1 ame: full=sarcosin);	PF00651=>BTB/POZ domain;PF07534=>TLD;PF07707=>BTB And C-terminal Kelch;	IPR011333 (BTB/POZ fold; IPR013089 (Kelch-related)
RirG199830	6		PF00651=>BTB/POZ domain;PF07534=>TLD;	IPR011333 (BTB/POZ fold; IPR013089 (Kelch-related)
RirG232650	6	GO:0005488=>binding=>btbd9_rat ame: full=btb poz domain-containing protein 9;GO:0009987=>cellular process=>btbd9_rat ame: full=btb poz domain-containing protein 9;GO:0044424=>intracellular part=>btbd9_rat ame: full=btb poz domain-containing protein 9);	PF00651=>BTB/POZ domain;PF07534=>TLD;	IPR011333 (BTB/POZ fold; IPR013089 (Kelch-related)
RirG202390	6	GO:0005737=>cytoplasm=>kbtba_rat ame: full=kelch repeat and btb domain-containing protein 10 ame: full=kel-like protein 23 ame: full=kelch-related protein 1 ame: full=sarcosin;GO:0009987=>cellular process=>kbtba_rat ame: full=kelch repeat and btb domain-containing protein 10 ame: full=kel-like protein 23 ame: full=kelch-related protein 1 ame: full=sarcosin);	PF00651=>BTB/POZ domain;PF07534=>TLD;	IPR011333 (BTB/POZ fold; IPR013089 (Kelch-related)
RirG214920	6		PF00569=>Zinc finger;ZZ type;PF00651=>BTB/POZ domain;PF07534=>TLD;PF07707=>BTB And C-terminal Kelch;	IPR000433 (Zinc finger, ZZ-type; IPR011333 (BTB/POZ fold; IPR013089 (Kelch-related)
RirG214950	6		PF00569=>Zinc finger;ZZ type;PF00651=>BTB/POZ domain;PF07534=>TLD;	IPR000433 (Zinc finger, ZZ-type; IPR011333 (BTB/POZ fold; IPR013089 (Kelch-related)
RirG236720	6	GO:0009987=>cellular process=>btbd9_rat ame: full=btb poz domain-containing protein 9;GO:0044424=>intracellular part=>btbd9_rat ame: full=btb poz domain-containing protein 9);	PF00651=>BTB/POZ domain;	IPR011333 (BTB/POZ fold; IPR013089 (Kelch-related)
RirG267720	6		PF00651=>BTB/POZ domain;PF07534=>TLD;	IPR011333 (BTB/POZ fold; IPR013089 (Kelch-related)
RirG202380	6	GO:0009987=>cellular process=>kbtba_rat ame: full=kelch repeat and btb domain-containing protein 10 ame: full=kel-like protein 23 ame: full=kelch-related protein 1 ame: full=sarcosin;GO:0044424=>intracellular part=>kbtba_rat ame: full=kelch repeat and btb domain-containing protein 10 ame: full=kel-like protein 23 ame: full=kelch-related protein 1 ame: full=sarcosin);	PF00651=>BTB/POZ domain;PF07534=>TLD;PF07707=>BTB And C-terminal Kelch;	IPR011333 (BTB/POZ fold; IPR013089 (Kelch-related)
RirG199850	6	GO:0005737=>cytoplasm=>kbtba_rat ame: full=kelch repeat and btb domain-containing protein 10 ame: full=kel-like protein 23 ame: full=kelch-related protein 1 ame: full=sarcosin;GO:0009987=>cellular process=>kbtba_rat ame: full=kelch repeat and btb domain-containing protein 10 ame: full=kel-like protein 23 ame: full=kelch-related protein 1 ame: full=sarcosin;GO:0043229=>intracellular organelle=>kbt…	PF00651=>BTB/POZ domain;PF07534=>TLD;	IPR011333 (BTB/POZ fold; IPR013089 (Kelch-related)
RirG187280	6		PF00651=>BTB/POZ domain;PF07534=>TLD;	IPR011333 (BTB/POZ fold; IPR013089 (Kelch-related)
RirG224110	6		PF00651=>BTB/POZ domain;PF07534=>TLD;	IPR006571 (TLDc; IPR011333 (BTB/POZ fold; IPR013089 (Kelch-related)
RirG210530	6		PF00651=>BTB/POZ domain;PF07707=>BTB And C-terminal Kelch;	IPR011333 (BTB/POZ fold; IPR013089 (Kelch-related)
RirG214900	6		PF00569=>Zinc finger;ZZ type;PF00651=>BTB/POZ domain;PF07534=>TLD;PF07707=>BTB And C-terminal Kelch;	IPR000433 (Zinc finger, ZZ-type; IPR011333 (BTB/POZ fold; IPR013089 (Kelch-related)
RirG236470	6		PF00651=>BTB/POZ domain;PF07534=>TLD;	IPR011333 (BTB/POZ fold; IPR013089 (Kelch-related)
RirG240740	6		PF00651=>BTB/POZ domain;PF07707=>BTB And C-terminal Kelch;	IPR011333 (BTB/POZ fold; IPR013089 (Kelch-related)
RirG271870	6	GO:0005488=>binding=>kbtba_human ame: full=kelch repeat and btb domain-containing protein 10 ame: full=kel-like protein 23 ame: full=kelch-related protein 1 ame: full=sarcosin;GO:0009987=>cellular process=>kbtba_human ame: full=kelch repeat and btb domain-containing protein 10 ame: full=kel-like protein 23 ame: full=kelch-related protein 1 ame: full=sarcosin;GO:0032502=>developmental process=>kbt…	PF00651=>BTB/POZ domain;PF07534=>TLD;PF07707=>BTB And C-terminal Kelch;	IPR011333 (BTB/POZ fold; IPR013089 (Kelch-related)
RirG210540	6		PF00569=>Zinc finger;ZZ type;PF00651=>BTB/POZ domain;PF07534=>TLD;	IPR000433 (Zinc finger, ZZ-type; IPR011333 (BTB/POZ fold; IPR013089 (Kelch-related)
RirG189330	6		PF00651=>BTB/POZ domain;PF07707=>BTB And C-terminal Kelch;	IPR011333 (BTB/POZ fold; IPR013089 (Kelch-related)
RirG218950	6		PF00651=>BTB/POZ domain;PF07534=>TLD;	IPR011333 (BTB/POZ fold; IPR013089 (Kelch-related)
RirG199840	6	GO:0009987=>cellular process=>btbd9_bovin ame: full=btb poz domain-containing protein 9;GO:0044424=>intracellular part=>btbd9_bovin ame: full=btb poz domain-containing protein 9);	PF00651=>BTB/POZ domain;PF07534=>TLD;	IPR011333 (BTB/POZ fold; IPR013089 (Kelch-related)
RirG236580	6		PF00651=>BTB/POZ domain;PF07534=>TLD;	IPR006571 (TLDc; IPR011333 (BTB/POZ fold; IPR013089 (Kelch-related)
RirG236510	6	GO:0032502=>developmental process=>btbd9_bovin ame: full=btb poz domain-containing protein 9;GO:0044424=>intracellular part=>btbd9_bovin ame: full=btb poz domain-containing protein 9);	PF00651=>BTB/POZ domain;PF07534=>TLD;	IPR011333 (BTB/POZ fold; IPR013089 (Kelch-related)
RirG258990	6		PF00651=>BTB/POZ domain;PF07534=>TLD;	IPR011333 (BTB/POZ fold; IPR013089 (Kelch-related)
RirG181640	6		PF00651=>BTB/POZ domain;PF07534=>TLD;	IPR006571 (TLDc; IPR011333 (BTB/POZ fold; IPR013089 (Kelch-related)
RirG191000	6	GO:0009987=>cellular process=>klh10_rat ame: full=kelch-like protein 10;GO:0022414=>reproductive process=>klh10_rat ame: full=kelch-like protein 10;GO:0044707=>single-multicellular organism process=>klh10_rat ame: full=kelch-like protein 10;GO:0048856=>anatomical structure development=>klh10_rat ame: full=kelch-like protein 10);	PF00651=>BTB/POZ domain;PF07534=>TLD;PF07707=>BTB And C-terminal Kelch;	IPR011333 (BTB/POZ fold; IPR013089 (Kelch-related)
RirG213660	6		PF00651=>BTB/POZ domain;PF07534=>TLD;PF07707=>BTB And C-terminal Kelch;	IPR011333 (BTB/POZ fold; IPR013089 (Kelch-related)
RirG198620	6		PF07534=>TLD;PF07707=>BTB And C-terminal Kelch;	IPR011333 (BTB/POZ fold; IPR013089 (Kelch-related)
RirG230020	6		PF00651=>BTB/POZ domain;PF07534=>TLD;PF07707=>BTB And C-terminal Kelch;	IPR011333 (BTB/POZ fold; IPR013089 (Kelch-related)
RirG028230	6		PF00651=>BTB/POZ domain;PF07534=>TLD;PF07707=>BTB And C-terminal Kelch;	IPR006571 (TLDc; IPR011333 (BTB/POZ fold; IPR013089 (Kelch-related)
RirG081340	6		PF00651=>BTB/POZ domain;PF07534=>TLD;PF07707=>BTB And C-terminal Kelch;	IPR006571 (TLDc; IPR011333 (BTB/POZ fold; IPR013089 (Kelch-related)
RirG033790	6	GO:0005737=>cytoplasm=>kbtba_human ame: full=kelch repeat and btb domain-containing protein 10 ame: full=kel-like protein 23 ame: full=kelch-related protein 1 ame: full=sarcosin;GO:0009987=>cellular process=>kbtba_human ame: full=kelch repeat and btb domain-containing protein 10 ame: full=kel-like protein 23 ame: full=kelch-related protein 1 ame: full=sarcosin;GO:0043231=>intracellular membrane-b…	PF00651=>BTB/POZ domain;PF07534=>TLD;PF07707=>BTB And C-terminal Kelch;	IPR011333 (BTB/POZ fold; IPR013089 (Kelch-related)
RirG028240	6		PF00651=>BTB/POZ domain;	IPR011333 (BTB/POZ fold; IPR013089 (Kelch-related)
RirG133250	6		PF00651=>BTB/POZ domain;PF07534=>TLD;PF07707=>BTB And C-terminal Kelch;	IPR006571 (TLDc; IPR011333 (BTB/POZ fold; IPR013089 (Kelch-related)
RirG111070	6	GO:0009987=>cellular process=>btbd9_human ame: full=btb poz domain-containing protein 9;GO:0044424=>intracellular part=>btbd9_human ame: full=btb poz domain-containing protein 9);	PF00651=>BTB/POZ domain;PF07534=>TLD;PF07707=>BTB And C-terminal Kelch;	IPR006571 (TLDc; IPR011333 (BTB/POZ fold; IPR013089 (Kelch-related)
RirG111030	6	GO:0005488=>binding=>btbd9_human ame: full=btb poz domain-containing protein 9;GO:0009987=>cellular process=>btbd9_human ame: full=btb poz domain-containing protein 9;GO:0043232=>intracellular non-membrane-bounded organelle=>btbd9_human ame: full=btb poz domain-containing protein 9);	PF00651=>BTB/POZ domain;PF07534=>TLD;PF07707=>BTB And C-terminal Kelch;	IPR006571 (TLDc; IPR011333 (BTB/POZ fold; IPR013089 (Kelch-related)
RirG112290	6	GO:0005488=>binding=>kbtba_human ame: full=kelch repeat and btb domain-containing protein 10 ame: full=kel-like protein 23 ame: full=kelch-related protein 1 ame: full=sarcosin;GO:0009987=>cellular process=>kbtba_human ame: full=kelch repeat and btb domain-containing protein 10 ame: full=kel-like protein 23 ame: full=kelch-related protein 1 ame: full=sarcosin;GO:0044424=>intracellular part=>kbtba_…	PF00651=>BTB/POZ domain;PF07534=>TLD;PF07707=>BTB And C-terminal Kelch;	IPR006571 (TLDc; IPR011333 (BTB/POZ fold; IPR013089 (Kelch-related)
RirG148170	6		PF00651=>BTB/POZ domain;PF07534=>TLD;PF07707=>BTB And C-terminal Kelch;	IPR011333 (BTB/POZ fold; IPR013089 (Kelch-related)
RirG065930	6	GO:0009987=>cellular process=>btbd9_rat ame: full=btb poz domain-containing protein 9;GO:0044424=>intracellular part=>btbd9_rat ame: full=btb poz domain-containing protein 9);	PF00651=>BTB/POZ domain;PF07534=>TLD;	IPR011333 (BTB/POZ fold; IPR013089 (Kelch-related)
RirG172550	6		PF00651=>BTB/POZ domain;PF07534=>TLD;	IPR011333 (BTB/POZ fold; IPR013089 (Kelch-related)
RirG154190	6	GO:0009987=>cellular process=>btbd9_rat ame: full=btb poz domain-containing protein 9;GO:0032502=>developmental process=>btbd9_rat ame: full=btb poz domain-containing protein 9);	PF00651=>BTB/POZ domain;PF07534=>TLD;PF07707=>BTB And C-terminal Kelch;	IPR011333 (BTB/POZ fold; IPR013089 (Kelch-related)
RirG116230	6	GO:0009987=>cellular process=>kbtba_human ame: full=kelch repeat and btb domain-containing protein 10 ame: full=kel-like protein 23 ame: full=kelch-related protein 1 ame: full=sarcosin;GO:0044424=>intracellular part=>kbtba_human ame: full=kelch repeat and btb domain-containing protein 10 ame: full=kel-like protein 23 ame: full=kelch-related protein 1 ame: full=sarcosin);	PF00651=>BTB/POZ domain;PF07534=>TLD;	IPR011333 (BTB/POZ fold; IPR013089 (Kelch-related)
RirG054290	6		PF00651=>BTB/POZ domain;PF07534=>TLD;PF07707=>BTB And C-terminal Kelch;	IPR011333 (BTB/POZ fold; IPR013089 (Kelch-related)
RirG034960	6	GO:0005488=>binding=>kbtba_human ame: full=kelch repeat and btb domain-containing protein 10 ame: full=kel-like protein 23 ame: full=kelch-related protein 1 ame: full=sarcosin;GO:0009987=>cellular process=>kbtba_human ame: full=kelch repeat and btb domain-containing protein 10 ame: full=kel-like protein 23 ame: full=kelch-related protein 1 ame: full=sarcosin;GO:0043232=>intracellular non-membrane…	PF00651=>BTB/POZ domain;PF07534=>TLD;PF07707=>BTB And C-terminal Kelch;	IPR006571 (TLDc; IPR011333 (BTB/POZ fold; IPR013089 (Kelch-related)
RirG105470	6		PF00651=>BTB/POZ domain;PF07534=>TLD;PF07707=>BTB And C-terminal Kelch;	IPR011333 (BTB/POZ fold; IPR013089 (Kelch-related)
RirG162620	6		PF00651=>BTB/POZ domain;PF07534=>TLD;PF07707=>BTB And C-terminal Kelch;	IPR011333 (BTB/POZ fold; IPR013089 (Kelch-related)
RirG062690	6		PF00651=>BTB/POZ domain;PF07534=>TLD;PF07707=>BTB And C-terminal Kelch;	IPR011333 (BTB/POZ fold; IPR013089 (Kelch-related)
RirG115700	6	GO:0005488=>binding=>zbt8a_rat ame: full=zinc finger and btb domain-containing protein 8a;GO:0009987=>cellular process=>zbt8a_rat ame: full=zinc finger and btb domain-containing protein 8a);	PF00651=>BTB/POZ domain;PF07534=>TLD;	IPR011333 (BTB/POZ fold; IPR013089 (Kelch-related)
RirG175990	6		PF00651=>BTB/POZ domain;PF07534=>TLD;	IPR011333 (BTB/POZ fold; IPR013089 (Kelch-related)
RirG049430	6	GO:0009987=>cellular process=>btbd2_human ame: full=btb poz domain-containing protein 2;GO:0032502=>developmental process=>btbd2_human ame: full=btb poz domain-containing protein 2);	PF00651=>BTB/POZ domain;PF07534=>TLD;PF07707=>BTB And C-terminal Kelch;	IPR011333 (BTB/POZ fold; IPR013089 (Kelch-related)
RirG119310	6		PF00651=>BTB/POZ domain;PF07534=>TLD;PF07707=>BTB And C-terminal Kelch;	IPR011333 (BTB/POZ fold; IPR013089 (Kelch-related)
RirG111040	6	GO:0005488=>binding=>btbd9_bovin ame: full=btb poz domain-containing protein 9;GO:0009987=>cellular process=>btbd9_bovin ame: full=btb poz domain-containing protein 9;GO:0043229=>intracellular organelle=>btbd9_bovin ame: full=btb poz domain-containing protein 9);	PF00651=>BTB/POZ domain;PF07534=>TLD;	IPR006571 (TLDc; IPR011333 (BTB/POZ fold; IPR013089 (Kelch-related)
RirG119280	6		PF00651=>BTB/POZ domain;PF07534=>TLD;PF07707=>BTB And C-terminal Kelch;	IPR011333 (BTB/POZ fold; IPR013089 (Kelch-related)
RirG041590	6	GO:0009987=>cellular process=>btbd9_rat ame: full=btb poz domain-containing protein 9;GO:0044424=>intracellular part=>btbd9_rat ame: full=btb poz domain-containing protein 9);	PF00651=>BTB/POZ domain;PF07534=>TLD;	IPR011333 (BTB/POZ fold; IPR013089 (Kelch-related)
RirG157170	6		PF00651=>BTB/POZ domain;PF07534=>TLD;	IPR006571 (TLDc; IPR011333 (BTB/POZ fold; IPR013089 (Kelch-related)
RirG102390	6		PF00651=>BTB/POZ domain;PF07534=>TLD;PF07707=>BTB And C-terminal Kelch;	IPR011333 (BTB/POZ fold; IPR013089 (Kelch-related)
RirG077390	6		PF00651=>BTB/POZ domain;PF07534=>TLD;PF07707=>BTB And C-terminal Kelch;	IPR011333 (BTB/POZ fold; IPR013089 (Kelch-related)
RirG111080	6		PF00651=>BTB/POZ domain;PF07534=>TLD;	IPR011333 (BTB/POZ fold; IPR013089 (Kelch-related)
RirG030410	6	GO:0009987=>cellular process=>btbd9_rat ame: full=btb poz domain-containing protein 9;GO:0044424=>intracellular part=>btbd9_rat ame: full=btb poz domain-containing protein 9);	PF00651=>BTB/POZ domain;PF07534=>TLD;PF07707=>BTB And C-terminal Kelch;	IPR011333 (BTB/POZ fold; IPR013089 (Kelch-related)
RirG156080	6		PF00651=>BTB/POZ domain;PF07534=>TLD;	IPR006571 (TLDc; IPR011333 (BTB/POZ fold; IPR013089 (Kelch-related)
RirG041850	6	GO:0009987=>cellular process=>kbtba_human ame: full=kelch repeat and btb domain-containing protein 10 ame: full=kel-like protein 23 ame: full=kelch-related protein 1 ame: full=sarcosin;GO:0044424=>intracellular part=>kbtba_human ame: full=kelch repeat and btb domain-containing protein 10 ame: full=kel-like protein 23 ame: full=kelch-related protein 1 ame: full=sarcosin);	PF00651=>BTB/POZ domain;PF00652=>Ricin-type beta-trefoil lectin domain;PF07534=>TLD;PF07707=>BTB And C-terminal Kelch;	IPR000772 (Ricin B lectin; IPR006571 (TLDc; IPR011333 (BTB/POZ fold; IPR013089 (Kelch-related)
RirG156700	6		PF00651=>BTB/POZ domain;PF07534=>TLD;PF07707=>BTB And C-terminal Kelch;	IPR006571 (TLDc; IPR011333 (BTB/POZ fold; IPR013089 (Kelch-related)
RirG072200	6	GO:0009987=>cellular process=>yn8b_schpo ame: full=zz-type zinc finger-containing protein);	PF00569=>Zinc finger;ZZ type;PF00651=>BTB/POZ domain;PF07534=>TLD;PF07707=>BTB And C-terminal Kelch;	IPR000433 (Zinc finger, ZZ-type; IPR011333 (BTB/POZ fold; IPR013089 (Kelch-related)
RirG107630	6	GO:0009987=>cellular process=>kbtba_rat ame: full=kelch repeat and btb domain-containing protein 10 ame: full=kel-like protein 23 ame: full=kelch-related protein 1 ame: full=sarcosin;GO:0044424=>intracellular part=>kbtba_rat ame: full=kelch repeat and btb domain-containing protein 10 ame: full=kel-like protein 23 ame: full=kelch-related protein 1 ame: full=sarcosin);	PF00651=>BTB/POZ domain;PF07534=>TLD;PF07707=>BTB And C-terminal Kelch;	IPR011333 (BTB/POZ fold; IPR013089 (Kelch-related)
RirG177810	6		PF00651=>BTB/POZ domain;PF07534=>TLD;	IPR011333 (BTB/POZ fold; IPR013089 (Kelch-related)
RirG162720	6	GO:0005515=>protein binding=>kbtba_human ame: full=kelch repeat and btb domain-containing protein 10 ame: full=kel-like protein 23 ame: full=kelch-related protein 1 ame: full=sarcosin;GO:0005737=>cytoplasm=>kbtba_human ame: full=kelch repeat and btb domain-containing protein 10 ame: full=kel-like protein 23 ame: full=kelch-related protein 1 ame: full=sarcosin;GO:0009987=>cellular process=>kbtba_h…	PF00651=>BTB/POZ domain;PF07534=>TLD;PF07707=>BTB And C-terminal Kelch;	IPR011333 (BTB/POZ fold; IPR013089 (Kelch-related)
RirG142640	6		PF00651=>BTB/POZ domain;PF07534=>TLD;PF07707=>BTB And C-terminal Kelch;	IPR011333 (BTB/POZ fold; IPR013089 (Kelch-related)
RirG143100	6	GO:0005488=>binding=>btbd2_human ame: full=btb poz domain-containing protein 2;GO:0009987=>cellular process=>btbd2_human ame: full=btb poz domain-containing protein 2;GO:0043229=>intracellular organelle=>btbd2_human ame: full=btb poz domain-containing protein 2);	PF00651=>BTB/POZ domain;PF07707=>BTB And C-terminal Kelch;	IPR011333 (BTB/POZ fold; IPR013089 (Kelch-related)
RirG148160	6		PF00651=>BTB/POZ domain;PF07534=>TLD;PF07707=>BTB And C-terminal Kelch;	IPR006571 (TLDc; IPR011333 (BTB/POZ fold; IPR013089 (Kelch-related)
RirG122460	6	GO:0005488=>binding=>btbd9_human ame: full=btb poz domain-containing protein 9);	PF00651=>BTB/POZ domain;PF07534=>TLD;PF07707=>BTB And C-terminal Kelch;	IPR011333 (BTB/POZ fold; IPR013089 (Kelch-related)
RirG058460	6		PF00651=>BTB/POZ domain;PF07534=>TLD;PF07707=>BTB And C-terminal Kelch;	IPR006571 (TLDc; IPR011333 (BTB/POZ fold; IPR013089 (Kelch-related)
RirG060780	6		PF00651=>BTB/POZ domain;PF07534=>TLD;	IPR011333 (BTB/POZ fold; IPR013089 (Kelch-related)
RirG037330	6	GO:0009987=>cellular process=>kbtba_rat ame: full=kelch repeat and btb domain-containing protein 10 ame: full=kel-like protein 23 ame: full=kelch-related protein 1 ame: full=sarcosin;GO:0044424=>intracellular part=>kbtba_rat ame: full=kelch repeat and btb domain-containing protein 10 ame: full=kel-like protein 23 ame: full=kelch-related protein 1 ame: full=sarcosin);	PF00651=>BTB/POZ domain;PF07534=>TLD;	IPR006571 (TLDc; IPR011333 (BTB/POZ fold; IPR013089 (Kelch-related)
RirG176080	6		PF00651=>BTB/POZ domain;PF07534=>TLD;PF07707=>BTB And C-terminal Kelch;	IPR011333 (BTB/POZ fold; IPR013089 (Kelch-related)
RirG037270	6		PF00651=>BTB/POZ domain;PF07534=>TLD;	IPR011333 (BTB/POZ fold; IPR013089 (Kelch-related)
RirG114740	6	GO:0009987=>cellular process=>btbd2_human ame: full=btb poz domain-containing protein 2;GO:0043229=>intracellular organelle=>btbd2_human ame: full=btb poz domain-containing protein 2);	PF00651=>BTB/POZ domain;PF07534=>TLD;PF07707=>BTB And C-terminal Kelch;	IPR006571 (TLDc; IPR011333 (BTB/POZ fold; IPR013089 (Kelch-related)
RirG145930	6		PF00651=>BTB/POZ domain;PF07534=>TLD;	IPR011333 (BTB/POZ fold; IPR013089 (Kelch-related)
RirG037260	6		PF00651=>BTB/POZ domain;PF07534=>TLD;	IPR011333 (BTB/POZ fold; IPR013089 (Kelch-related)
RirG162730	6		PF00651=>BTB/POZ domain;PF07534=>TLD;PF07707=>BTB And C-terminal Kelch;	IPR011333 (BTB/POZ fold; IPR013089 (Kelch-related)
RirG140590	6		PF00651=>BTB/POZ domain;PF07534=>TLD;	IPR011333 (BTB/POZ fold; IPR013089 (Kelch-related)
RirG135710	6		PF00651=>BTB/POZ domain;PF00652=>Ricin-type beta-trefoil lectin domain;PF07534=>TLD;PF07707=>BTB And C-terminal Kelch;	IPR000772 (Ricin B lectin; IPR011333 (BTB/POZ fold; IPR013089 (Kelch-related)
RirG105040	6	GO:0005488=>binding=>btbd9_bovin ame: full=btb poz domain-containing protein 9;GO:0009987=>cellular process=>btbd9_bovin ame: full=btb poz domain-containing protein 9;GO:0043232=>intracellular non-membrane-bounded organelle=>btbd9_bovin ame: full=btb poz domain-containing protein 9);	PF00651=>BTB/POZ domain;PF07534=>TLD;PF07707=>BTB And C-terminal Kelch;	IPR006571 (TLDc; IPR011333 (BTB/POZ fold; IPR013089 (Kelch-related)
RirG033930	6	GO:0005488=>binding=>btbd2_human ame: full=btb poz domain-containing protein 2);	PF00651=>BTB/POZ domain;PF07707=>BTB And C-terminal Kelch;	IPR011333 (BTB/POZ fold; IPR013089 (Kelch-related)
RirG096010	6	GO:0005488=>binding=>kbtba_human ame: full=kelch repeat and btb domain-containing protein 10 ame: full=kel-like protein 23 ame: full=kelch-related protein 1 ame: full=sarcosin;GO:0009987=>cellular process=>kbtba_human ame: full=kelch repeat and btb domain-containing protein 10 ame: full=kel-like protein 23 ame: full=kelch-related protein 1 ame: full=sarcosin;GO:0032502=>developmental process=>kbt…	PF00651=>BTB/POZ domain;PF07534=>TLD;PF07707=>BTB And C-terminal Kelch;	IPR011333 (BTB/POZ fold; IPR013089 (Kelch-related)
RirG096020	6		PF00651=>BTB/POZ domain;PF00652=>Ricin-type beta-trefoil lectin domain;PF07534=>TLD;PF07707=>BTB And C-terminal Kelch;	IPR000772 (Ricin B lectin; IPR006571 (TLDc; IPR011333 (BTB/POZ fold; IPR013089 (Kelch-related)
RirG114180	6		PF00651=>BTB/POZ domain;PF07534=>TLD;PF07707=>BTB And C-terminal Kelch;	IPR011333 (BTB/POZ fold; IPR013089 (Kelch-related)
RirG118720	6		PF00651=>BTB/POZ domain;PF07534=>TLD;PF07707=>BTB And C-terminal Kelch;	IPR011333 (BTB/POZ fold; IPR013089 (Kelch-related)
RirG073050	6		PF00651=>BTB/POZ domain;PF07534=>TLD;PF07707=>BTB And C-terminal Kelch;	IPR006571 (TLDc; IPR008997 (Ricin B-related lectin; IPR011333 (BTB/POZ fold; IPR013089 (Kelch-related)
RirG046050	6		PF00651=>BTB/POZ domain;PF07534=>TLD;	IPR011333 (BTB/POZ fold; IPR013089 (Kelch-related)
RirG141380	6	GO:0009987=>cellular process=>kbtba_rat ame: full=kelch repeat and btb domain-containing protein 10 ame: full=kel-like protein 23 ame: full=kelch-related protein 1 ame: full=sarcosin;GO:0044424=>intracellular part=>kbtba_rat ame: full=kelch repeat and btb domain-containing protein 10 ame: full=kel-like protein 23 ame: full=kelch-related protein 1 ame: full=sarcosin);	PF00651=>BTB/POZ domain;PF07534=>TLD;	IPR011333 (BTB/POZ fold; IPR013089 (Kelch-related)
RirG079350	6		PF00651=>BTB/POZ domain;PF07534=>TLD;	IPR011333 (BTB/POZ fold; IPR013089 (Kelch-related)
RirG171000	6	GO:0005488=>binding=>kbtba_rat ame: full=kelch repeat and btb domain-containing protein 10 ame: full=kel-like protein 23 ame: full=kelch-related protein 1 ame: full=sarcosin;GO:0009987=>cellular process=>kbtba_rat ame: full=kelch repeat and btb domain-containing protein 10 ame: full=kel-like protein 23 ame: full=kelch-related protein 1 ame: full=sarcosin;GO:0044424=>intracellular part=>kbtba_rat …	PF00651=>BTB/POZ domain;PF07707=>BTB And C-terminal Kelch;	IPR011333 (BTB/POZ fold; IPR013089 (Kelch-related)
RirG161740	6		PF00651=>BTB/POZ domain;PF07534=>TLD;	IPR011333 (BTB/POZ fold; IPR013089 (Kelch-related)
RirG061100	6	GO:0009987=>cellular process=>kbtba_rat ame: full=kelch repeat and btb domain-containing protein 10 ame: full=kel-like protein 23 ame: full=kelch-related protein 1 ame: full=sarcosin;GO:0044424=>intracellular part=>kbtba_rat ame: full=kelch repeat and btb domain-containing protein 10 ame: full=kel-like protein 23 ame: full=kelch-related protein 1 ame: full=sarcosin);	PF00651=>BTB/POZ domain;PF07534=>TLD;PF07707=>BTB And C-terminal Kelch;	IPR011333 (BTB/POZ fold; IPR013089 (Kelch-related)
RirG077400	6	GO:0032502=>developmental process=>btbd6_human ame: full=btb poz domain-containing protein 6 ame: full=lens btb domain protein);	PF00651=>BTB/POZ domain;PF07534=>TLD;	IPR011333 (BTB/POZ fold; IPR013089 (Kelch-related)
RirG178980	6		PF00651=>BTB/POZ domain;PF07534=>TLD;	IPR011333 (BTB/POZ fold; IPR013089 (Kelch-related)
RirG037290	6	GO:0044424=>intracellular part=>kbtba_rat ame: full=kelch repeat and btb domain-containing protein 10 ame: full=kel-like protein 23 ame: full=kelch-related protein 1 ame: full=sarcosin);	PF00651=>BTB/POZ domain;PF07534=>TLD;	IPR011333 (BTB/POZ fold; IPR013089 (Kelch-related)
RirG173950	6		PF00651=>BTB/POZ domain;PF07534=>TLD;PF07707=>BTB And C-terminal Kelch;	IPR011333 (BTB/POZ fold; IPR013089 (Kelch-related)
RirG118750	6		PF00651=>BTB/POZ domain;PF00652=>Ricin-type beta-trefoil lectin domain;PF07534=>TLD;PF07707=>BTB And C-terminal Kelch;	IPR000772 (Ricin B lectin; IPR011333 (BTB/POZ fold; IPR013089 (Kelch-related)
RirG072930	6		PF00651=>BTB/POZ domain;PF07534=>TLD;PF07707=>BTB And C-terminal Kelch;	IPR006571 (TLDc; IPR011333 (BTB/POZ fold; IPR013089 (Kelch-related)
RirG057410	6		PF00651=>BTB/POZ domain;PF07534=>TLD;PF07707=>BTB And C-terminal Kelch;	IPR011333 (BTB/POZ fold; IPR013089 (Kelch-related)
RirG054000	6		PF00651=>BTB/POZ domain;PF00652=>Ricin-type beta-trefoil lectin domain;PF07534=>TLD;PF07707=>BTB And C-terminal Kelch;	IPR000772 (Ricin B lectin; IPR011333 (BTB/POZ fold; IPR013089 (Kelch-related)
RirG170980	6		PF00651=>BTB/POZ domain;PF07534=>TLD;	IPR011333 (BTB/POZ fold; IPR013089 (Kelch-related)
RirG061090	6		PF00651=>BTB/POZ domain;PF07707=>BTB And C-terminal Kelch;	IPR011333 (BTB/POZ fold; IPR013089 (Kelch-related)
RirG140950	6		PF00651=>BTB/POZ domain;PF07534=>TLD;PF07707=>BTB And C-terminal Kelch;	IPR011333 (BTB/POZ fold; IPR013089 (Kelch-related)
RirG171010	6		PF00651=>BTB/POZ domain;PF07534=>TLD;PF07707=>BTB And C-terminal Kelch;	IPR011333 (BTB/POZ fold; IPR013089 (Kelch-related)
RirG061130	6	GO:0005515=>protein binding=>y2060_arath ame: full=btb poz domain-containing protein at2g30600;GO:0005634=>nucleus=>y2060_arath ame: full=btb poz domain-containing protein at2g30600;GO:0044238=>primary metabolic process=>y2060_arath ame: full=btb poz domain-containing protein at2g30600;GO:0044260=>cellular macromolecule metabolic process=>y2060_arath ame: full=btb poz domain-containing protein at…	PF00651=>BTB/POZ domain;PF07534=>TLD;	IPR011333 (BTB/POZ fold; IPR013089 (Kelch-related)
RirG135510	6	GO:0044424=>intracellular part=>kbtba_rat ame: full=kelch repeat and btb domain-containing protein 10 ame: full=kel-like protein 23 ame: full=kelch-related protein 1 ame: full=sarcosin);	PF00651=>BTB/POZ domain;PF07534=>TLD;	IPR011333 (BTB/POZ fold; IPR013089 (Kelch-related)
RirG170990	6		PF00651=>BTB/POZ domain;PF07534=>TLD;	IPR011333 (BTB/POZ fold; IPR013089 (Kelch-related)
RirG090470	6		PF00651=>BTB/POZ domain;PF07534=>TLD;PF07707=>BTB And C-terminal Kelch;	IPR011333 (BTB/POZ fold; IPR013089 (Kelch-related)
RirG165880	6	GO:0005488=>binding=>btbd9_rat ame: full=btb poz domain-containing protein 9;GO:0009987=>cellular process=>btbd9_rat ame: full=btb poz domain-containing protein 9;GO:0044424=>intracellular part=>btbd9_rat ame: full=btb poz domain-containing protein 9);	PF00651=>BTB/POZ domain;PF07707=>BTB And C-terminal Kelch;	IPR011333 (BTB/POZ fold; IPR013089 (Kelch-related)
RirG041770	6		PF00651=>BTB/POZ domain;PF07534=>TLD;PF07707=>BTB And C-terminal Kelch;	IPR011333 (BTB/POZ fold; IPR013089 (Kelch-related)
RirG170960	6	GO:0005488=>binding=>kbtb5_xentr ame: full=kelch repeat and btb domain-containing protein 5;GO:0009987=>cellular process=>kbtb5_xentr ame: full=kelch repeat and btb domain-containing protein 5;GO:0044424=>intracellular part=>kbtb5_xentr ame: full=kelch repeat and btb domain-containing protein 5);	PF00651=>BTB/POZ domain;PF07534=>TLD;	IPR011333 (BTB/POZ fold; IPR013089 (Kelch-related)
RirG105030	6		PF00651=>BTB/POZ domain;PF07534=>TLD;	IPR006571 (TLDc; IPR011333 (BTB/POZ fold; IPR013089 (Kelch-related)
RirG165870	6	GO:0005488=>binding=>kbtba_human ame: full=kelch repeat and btb domain-containing protein 10 ame: full=kel-like protein 23 ame: full=kelch-related protein 1 ame: full=sarcosin;GO:0009987=>cellular process=>kbtba_human ame: full=kelch repeat and btb domain-containing protein 10 ame: full=kel-like protein 23 ame: full=kelch-related protein 1 ame: full=sarcosin;GO:0044424=>intracellular part=>kbtba_…	PF00651=>BTB/POZ domain;PF07707=>BTB And C-terminal Kelch;	IPR011333 (BTB/POZ fold; IPR013089 (Kelch-related)
RirG061080	6	GO:0009987=>cellular process=>btbd9_rat ame: full=btb poz domain-containing protein 9;GO:0043229=>intracellular organelle=>btbd9_rat ame: full=btb poz domain-containing protein 9);	PF00651=>BTB/POZ domain;PF07707=>BTB And C-terminal Kelch;	IPR011333 (BTB/POZ fold; IPR013089 (Kelch-related)
RirG178960	6		PF00651=>BTB/POZ domain;PF07534=>TLD;	IPR006571 (TLDc; IPR011333 (BTB/POZ fold; IPR013089 (Kelch-related)
RirG152440	6		PF00651=>BTB/POZ domain;PF07534=>TLD;	IPR011333 (BTB/POZ fold; IPR013089 (Kelch-related)
RirG143110	6		PF00651=>BTB/POZ domain;PF07534=>TLD;PF07707=>BTB And C-terminal Kelch;	IPR011333 (BTB/POZ fold; IPR013089 (Kelch-related)
RirG120210	6		PF00651=>BTB/POZ domain;PF07534=>TLD;	IPR006571 (TLDc; IPR011333 (BTB/POZ fold; IPR013089 (Kelch-related)
RirG153690	6		PF00651=>BTB/POZ domain;PF07534=>TLD;	IPR011333 (BTB/POZ fold; IPR013089 (Kelch-related)
RirG135350	6		PF00651=>BTB/POZ domain;PF07534=>TLD;	IPR011333 (BTB/POZ fold; IPR013089 (Kelch-related)
RirG230010	6		PF00651=>BTB/POZ domain;PF07534=>TLD;PF07707=>BTB And C-terminal Kelch;	IPR011333 (BTB/POZ fold; IPR013089 (Kelch-related)
RirG052230	6		PF00651=>BTB/POZ domain;PF07534=>TLD;PF07707=>BTB And C-terminal Kelch;	IPR006571 (TLDc; IPR011333 (BTB/POZ fold; IPR013089 (Kelch-related)
RirG104550	6		PF00651=>BTB/POZ domain;PF07534=>TLD;PF07707=>BTB And C-terminal Kelch;	IPR011333 (BTB/POZ fold; IPR013089 (Kelch-related)
RirG104540	6	GO:0022414=>reproductive process=>btbd9_bovin ame: full=btb poz domain-containing protein 9;GO:0044707=>single-multicellular organism process=>btbd9_bovin ame: full=btb poz domain-containing protein 9;GO:0048856=>anatomical structure development=>btbd9_bovin ame: full=btb poz domain-containing protein 9);	PF00651=>BTB/POZ domain;PF07534=>TLD;PF07707=>BTB And C-terminal Kelch;	IPR011333 (BTB/POZ fold; IPR013089 (Kelch-related)
RirG164040	6		PF00651=>BTB/POZ domain;PF07534=>TLD;PF07707=>BTB And C-terminal Kelch;	IPR011333 (BTB/POZ fold; IPR013089 (Kelch-related)
RirG102640	6		PF00651=>BTB/POZ domain;PF07534=>TLD;PF07707=>BTB And C-terminal Kelch;	IPR011333 (BTB/POZ fold; IPR013089 (Kelch-related)
RirG118900	6	GO:0003006=>developmental process involved in reproduction=>btbd9_rat ame: full=btb poz domain-containing protein 9;GO:0009987=>cellular process=>btbd9_rat ame: full=btb poz domain-containing protein 9;GO:0044707=>single-multicellular organism process=>btbd9_rat ame: full=btb poz domain-containing protein 9;GO:0048856=>anatomical structure development=>btbd9_rat ame: full=btb poz domain-containin…	PF00651=>BTB/POZ domain;PF07534=>TLD;PF07707=>BTB And C-terminal Kelch;	IPR011333 (BTB/POZ fold; IPR013089 (Kelch-related)
RirG050520	6	GO:0022414=>reproductive process=>btbd9_rat ame: full=btb poz domain-containing protein 9;GO:0044707=>single-multicellular organism process=>btbd9_rat ame: full=btb poz domain-containing protein 9;GO:0048856=>anatomical structure development=>btbd9_rat ame: full=btb poz domain-containing protein 9);	PF00651=>BTB/POZ domain;PF07534=>TLD;PF07707=>BTB And C-terminal Kelch;	IPR011333 (BTB/POZ fold; IPR013089 (Kelch-related)
RirG066770	6		PF00651=>BTB/POZ domain;PF07534=>TLD;PF07707=>BTB And C-terminal Kelch;	IPR011333 (BTB/POZ fold; IPR013089 (Kelch-related)
RirG043430	6		PF00651=>BTB/POZ domain;PF07534=>TLD;PF07707=>BTB And C-terminal Kelch;	IPR011333 (BTB/POZ fold; IPR013089 (Kelch-related)
RirG133440	6		PF00651=>BTB/POZ domain;PF07534=>TLD;PF07707=>BTB And C-terminal Kelch;	IPR011333 (BTB/POZ fold; IPR013089 (Kelch-related)
RirG133520	6	GO:0009987=>cellular process=>ipp_human ame: full=actin-binding protein ipp ame: full=intracisternal a particle-promoted polypeptide short=ipp ame: full=kelch-like protein 27;GO:0022414=>reproductive process=>ipp_human ame: full=actin-binding protein ipp ame: full=intracisternal a particle-promoted polypeptide short=ipp ame: full=kelch-like protein 27;GO:0043232=>intracellular non-membrane-bounde…	PF00651=>BTB/POZ domain;PF07534=>TLD;PF07707=>BTB And C-terminal Kelch;	IPR006571 (TLDc; IPR011333 (BTB/POZ fold; IPR013089 (Kelch-related)
RirG154750	6		PF00651=>BTB/POZ domain;PF07534=>TLD;PF07707=>BTB And C-terminal Kelch;	IPR011333 (BTB/POZ fold; IPR013089 (Kelch-related)
RirG239100	6	GO:0003006=>developmental process involved in reproduction=>btbd9_bovin ame: full=btb poz domain-containing protein 9;GO:0009987=>cellular process=>btbd9_bovin ame: full=btb poz domain-containing protein 9;GO:0044707=>single-multicellular organism process=>btbd9_bovin ame: full=btb poz domain-containing protein 9;GO:0048856=>anatomical structure development=>btbd9_bovin ame: full=btb poz domain-c…	PF00651=>BTB/POZ domain;PF07707=>BTB And C-terminal Kelch;	IPR011333 (BTB/POZ fold; IPR013089 (Kelch-related)
RirG154740	6	GO:0003006=>developmental process involved in reproduction=>btbd9_bovin ame: full=btb poz domain-containing protein 9;GO:0009987=>cellular process=>btbd9_bovin ame: full=btb poz domain-containing protein 9;GO:0044707=>single-multicellular organism process=>btbd9_bovin ame: full=btb poz domain-containing protein 9;GO:0048856=>anatomical structure development=>btbd9_bovin ame: full=btb poz domain-c…	PF00651=>BTB/POZ domain;PF07534=>TLD;PF07707=>BTB And C-terminal Kelch;	IPR011333 (BTB/POZ fold; IPR013089 (Kelch-related)
RirG160190	6		PF00651=>BTB/POZ domain;PF07534=>TLD;PF07707=>BTB And C-terminal Kelch;	IPR011333 (BTB/POZ fold; IPR013089 (Kelch-related)
RirG113650	6	GO:0022414=>reproductive process=>btbd9_bovin ame: full=btb poz domain-containing protein 9;GO:0044707=>single-multicellular organism process=>btbd9_bovin ame: full=btb poz domain-containing protein 9;GO:0048856=>anatomical structure development=>btbd9_bovin ame: full=btb poz domain-containing protein 9);	PF00651=>BTB/POZ domain;PF07534=>TLD;PF07707=>BTB And C-terminal Kelch;	IPR011333 (BTB/POZ fold; IPR013089 (Kelch-related)
RirG154780	6		PF00651=>BTB/POZ domain;PF07534=>TLD;PF07707=>BTB And C-terminal Kelch;	IPR011333 (BTB/POZ fold; IPR013089 (Kelch-related)
RirG118270	6		PF00651=>BTB/POZ domain;PF07534=>TLD;	IPR011333 (BTB/POZ fold; IPR013089 (Kelch-related)
RirG215250	6	GO:0022414=>reproductive process=>btbd9_bovin ame: full=btb poz domain-containing protein 9;GO:0044707=>single-multicellular organism process=>btbd9_bovin ame: full=btb poz domain-containing protein 9;GO:0048856=>anatomical structure development=>btbd9_bovin ame: full=btb poz domain-containing protein 9);	PF00651=>BTB/POZ domain;PF07534=>TLD;PF07707=>BTB And C-terminal Kelch;	IPR011333 (BTB/POZ fold; IPR013089 (Kelch-related)
RirG118880	6	GO:0003006=>developmental process involved in reproduction=>klh10_rat ame: full=kelch-like protein 10;GO:0009987=>cellular process=>klh10_rat ame: full=kelch-like protein 10;GO:0044707=>single-multicellular organism process=>klh10_rat ame: full=kelch-like protein 10;GO:0048856=>anatomical structure development=>klh10_rat ame: full=kelch-like protein 10);	PF00651=>BTB/POZ domain;PF07534=>TLD;PF07707=>BTB And C-terminal Kelch;	IPR011333 (BTB/POZ fold; IPR013089 (Kelch-related)
RirG118890	6		PF00651=>BTB/POZ domain;PF07534=>TLD;PF07707=>BTB And C-terminal Kelch;	IPR011333 (BTB/POZ fold; IPR013089 (Kelch-related)
RirG134790	6		PF00651=>BTB/POZ domain;PF07707=>BTB And C-terminal Kelch;	IPR011333 (BTB/POZ fold; IPR013089 (Kelch-related)
RirG108260	6	GO:0003006=>developmental process involved in reproduction=>btbd9_rat ame: full=btb poz domain-containing protein 9;GO:0009987=>cellular process=>btbd9_rat ame: full=btb poz domain-containing protein 9;GO:0044707=>single-multicellular organism process=>btbd9_rat ame: full=btb poz domain-containing protein 9;GO:0048856=>anatomical structure development=>btbd9_rat ame: full=btb poz domain-containin…	PF00651=>BTB/POZ domain;PF07534=>TLD;PF07707=>BTB And C-terminal Kelch;	IPR011333 (BTB/POZ fold; IPR013089 (Kelch-related)
RirG087800	6		PF00651=>BTB/POZ domain;PF07534=>TLD;PF07707=>BTB And C-terminal Kelch;	IPR011333 (BTB/POZ fold; IPR013089 (Kelch-related)
RirG141920	6	GO:0005737=>cytoplasm=>btbd9_bovin ame: full=btb poz domain-containing protein 9;GO:0009987=>cellular process=>btbd9_bovin ame: full=btb poz domain-containing protein 9;GO:0022414=>reproductive process=>btbd9_bovin ame: full=btb poz domain-containing protein 9;GO:0043232=>intracellular non-membrane-bounded organelle=>btbd9_bovin ame: full=btb poz domain-containing protein 9;GO:0044707=>single-mul…	PF00651=>BTB/POZ domain;PF07534=>TLD;PF07707=>BTB And C-terminal Kelch;	IPR011333 (BTB/POZ fold; IPR013089 (Kelch-related)
RirG254480	6		PF00651=>BTB/POZ domain;PF07534=>TLD;PF07707=>BTB And C-terminal Kelch;	IPR011333 (BTB/POZ fold; IPR013089 (Kelch-related)
RirG258330	6		PF00651=>BTB/POZ domain;PF07534=>TLD;PF07707=>BTB And C-terminal Kelch;	IPR011333 (BTB/POZ fold; IPR013089 (Kelch-related)
RirG066750	6	GO:0003006=>developmental process involved in reproduction=>btbd9_rat ame: full=btb poz domain-containing protein 9;GO:0009987=>cellular process=>btbd9_rat ame: full=btb poz domain-containing protein 9;GO:0044707=>single-multicellular organism process=>btbd9_rat ame: full=btb poz domain-containing protein 9;GO:0048856=>anatomical structure development=>btbd9_rat ame: full=btb poz domain-containin…	PF00651=>BTB/POZ domain;PF07534=>TLD;PF07707=>BTB And C-terminal Kelch;	IPR011333 (BTB/POZ fold; IPR013089 (Kelch-related)
RirG250120	6		PF00651=>BTB/POZ domain;PF07534=>TLD;PF07707=>BTB And C-terminal Kelch;	IPR011333 (BTB/POZ fold; IPR013089 (Kelch-related)
RirG250030	6		PF00651=>BTB/POZ domain;PF07534=>TLD;PF07707=>BTB And C-terminal Kelch;	IPR011333 (BTB/POZ fold; IPR013089 (Kelch-related)
RirG213680	6		PF00651=>BTB/POZ domain;PF07534=>TLD;PF07707=>BTB And C-terminal Kelch;	IPR011333 (BTB/POZ fold; IPR013089 (Kelch-related)
RirG237430	6		PF00651=>BTB/POZ domain;PF07534=>TLD;PF07707=>BTB And C-terminal Kelch;	IPR011333 (BTB/POZ fold; IPR013089 (Kelch-related)
RirG032090	6		PF00651=>BTB/POZ domain;PF07707=>BTB And C-terminal Kelch;	IPR011333 (BTB/POZ fold; IPR013089 (Kelch-related)
RirG150620	6		PF00651=>BTB/POZ domain;PF07534=>TLD;PF07707=>BTB And C-terminal Kelch;	IPR011333 (BTB/POZ fold; IPR013089 (Kelch-related)
RirG180590	6	GO:0003006=>developmental process involved in reproduction=>btbd9_bovin ame: full=btb poz domain-containing protein 9;GO:0009987=>cellular process=>btbd9_bovin ame: full=btb poz domain-containing protein 9;GO:0044707=>single-multicellular organism process=>btbd9_bovin ame: full=btb poz domain-containing protein 9;GO:0048856=>anatomical structure development=>btbd9_bovin ame: full=btb poz domain-c…	PF00651=>BTB/POZ domain;PF07534=>TLD;PF07707=>BTB And C-terminal Kelch;	IPR006571 (TLDc; IPR011333 (BTB/POZ fold; IPR013089 (Kelch-related)
RirG104530	6		PF00651=>BTB/POZ domain;PF07534=>TLD;PF07707=>BTB And C-terminal Kelch;	IPR011333 (BTB/POZ fold; IPR013089 (Kelch-related)
RirG247530	6	GO:0009987=>cellular process=>btbd9_rat ame: full=btb poz domain-containing protein 9;GO:0044424=>intracellular part=>btbd9_rat ame: full=btb poz domain-containing protein 9);	PF00651=>BTB/POZ domain;PF07534=>TLD;PF07707=>BTB And C-terminal Kelch;	IPR011333 (BTB/POZ fold; IPR013089 (Kelch-related)
RirG160200	6	GO:0003006=>developmental process involved in reproduction=>btbd9_bovin ame: full=btb poz domain-containing protein 9;GO:0009987=>cellular process=>btbd9_bovin ame: full=btb poz domain-containing protein 9;GO:0044707=>single-multicellular organism process=>btbd9_bovin ame: full=btb poz domain-containing protein 9;GO:0048856=>anatomical structure development=>btbd9_bovin ame: full=btb poz domain-c…	PF00651=>BTB/POZ domain;PF07534=>TLD;PF07707=>BTB And C-terminal Kelch;	IPR011333 (BTB/POZ fold; IPR013089 (Kelch-related)
RirG043930	6		PF00651=>BTB/POZ domain;PF07534=>TLD;PF07707=>BTB And C-terminal Kelch;	IPR011333 (BTB/POZ fold; IPR013089 (Kelch-related)
RirG140540	6	GO:0044424=>intracellular part=>btbd9_bovin ame: full=btb poz domain-containing protein 9);	PF00651=>BTB/POZ domain;PF07534=>TLD;PF07707=>BTB And C-terminal Kelch;	IPR011333 (BTB/POZ fold; IPR013089 (Kelch-related)
RirG073350	6		PF00651=>BTB/POZ domain;PF07534=>TLD;PF07707=>BTB And C-terminal Kelch;	IPR011333 (BTB/POZ fold; IPR013089 (Kelch-related)
RirG260200	6	GO:0022414=>reproductive process=>btbd9_bovin ame: full=btb poz domain-containing protein 9;GO:0044707=>single-multicellular organism process=>btbd9_bovin ame: full=btb poz domain-containing protein 9;GO:0048856=>anatomical structure development=>btbd9_bovin ame: full=btb poz domain-containing protein 9);	PF00651=>BTB/POZ domain;PF07534=>TLD;PF07707=>BTB And C-terminal Kelch;	IPR011333 (BTB/POZ fold; IPR013089 (Kelch-related)
RirG247500	6	GO:0003006=>developmental process involved in reproduction=>kbtba_rat ame: full=kelch repeat and btb domain-containing protein 10 ame: full=kel-like protein 23 ame: full=kelch-related protein 1 ame: full=sarcosin;GO:0009987=>cellular process=>kbtba_rat ame: full=kelch repeat and btb domain-containing protein 10 ame: full=kel-like protein 23 ame: full=kelch-related protein 1 ame: full=sarcosin;GO:…	PF00651=>BTB/POZ domain;PF07534=>TLD;PF07707=>BTB And C-terminal Kelch;	IPR011333 (BTB/POZ fold; IPR013089 (Kelch-related)
RirG160900	6		PF00651=>BTB/POZ domain;PF07534=>TLD;PF07707=>BTB And C-terminal Kelch;	IPR011333 (BTB/POZ fold; IPR013089 (Kelch-related)
RirG154790	6		PF00651=>BTB/POZ domain;PF07534=>TLD;PF07707=>BTB And C-terminal Kelch;	IPR011333 (BTB/POZ fold; IPR013089 (Kelch-related)
RirG237420	6		PF00651=>BTB/POZ domain;PF07534=>TLD;PF07707=>BTB And C-terminal Kelch;	IPR011333 (BTB/POZ fold; IPR013089 (Kelch-related)
RirG170070	6		PF00651=>BTB/POZ domain;PF07534=>TLD;PF07707=>BTB And C-terminal Kelch;	IPR011333 (BTB/POZ fold; IPR013089 (Kelch-related)
RirG046850	6	GO:0009987=>cellular process=>btbd9_rat ame: full=btb poz domain-containing protein 9;GO:0022414=>reproductive process=>btbd9_rat ame: full=btb poz domain-containing protein 9;GO:0044707=>single-multicellular organism process=>btbd9_rat ame: full=btb poz domain-containing protein 9;GO:0048856=>anatomical structure development=>btbd9_rat ame: full=btb poz domain-containing protein 9);	PF00651=>BTB/POZ domain;PF07534=>TLD;	IPR006571 (TLDc; IPR011333 (BTB/POZ fold; IPR013089 (Kelch-related)
RirG084780	6		PF00651=>BTB/POZ domain;PF07534=>TLD;PF07707=>BTB And C-terminal Kelch;	IPR011333 (BTB/POZ fold; IPR013089 (Kelch-related)
RirG160800	6		PF00651=>BTB/POZ domain;PF07534=>TLD;PF07707=>BTB And C-terminal Kelch;	IPR011333 (BTB/POZ fold; IPR013089 (Kelch-related)
RirG057990	6		PF00651=>BTB/POZ domain;PF07534=>TLD;PF07707=>BTB And C-terminal Kelch;	IPR006571 (TLDc; IPR011333 (BTB/POZ fold; IPR013089 (Kelch-related)
RirG191670	6		PF00651=>BTB/POZ domain;PF07534=>TLD;PF07707=>BTB And C-terminal Kelch;	IPR011333 (BTB/POZ fold; IPR013089 (Kelch-related)
RirG108270	6	GO:0003006=>developmental process involved in reproduction=>klh10_rat ame: full=kelch-like protein 10;GO:0009987=>cellular process=>klh10_rat ame: full=kelch-like protein 10;GO:0044707=>single-multicellular organism process=>klh10_rat ame: full=kelch-like protein 10;GO:0048856=>anatomical structure development=>klh10_rat ame: full=kelch-like protein 10);	PF00651=>BTB/POZ domain;PF07534=>TLD;PF07707=>BTB And C-terminal Kelch;	IPR011333 (BTB/POZ fold; IPR013089 (Kelch-related)
RirG133510	6	GO:0003006=>developmental process involved in reproduction=>kbtba_rat ame: full=kelch repeat and btb domain-containing protein 10 ame: full=kel-like protein 23 ame: full=kelch-related protein 1 ame: full=sarcosin;GO:0009987=>cellular process=>kbtba_rat ame: full=kelch repeat and btb domain-containing protein 10 ame: full=kel-like protein 23 ame: full=kelch-related protein 1 ame: full=sarcosin;GO:…	PF00651=>BTB/POZ domain;PF07534=>TLD;PF07707=>BTB And C-terminal Kelch;	IPR011333 (BTB/POZ fold; IPR013089 (Kelch-related)
RirG133460	6	GO:0009653=>anatomical structure morphogenesis=>klh10_rat ame: full=kelch-like protein 10;GO:0019953=>sexual reproduction=>klh10_rat ame: full=kelch-like protein 10;GO:0044424=>intracellular part=>klh10_rat ame: full=kelch-like protein 10;GO:0046546=>development of primary male sexual characteristics=>klh10_rat ame: full=kelch-like protein 10;GO:0048513=>organ development=>klh10_rat ame: full=kel…	PF00651=>BTB/POZ domain;PF07534=>TLD;PF07707=>BTB And C-terminal Kelch;	IPR011333 (BTB/POZ fold; IPR013089 (Kelch-related)
RirG053100	6		PF00651=>BTB/POZ domain;PF07707=>BTB And C-terminal Kelch;	IPR011333 (BTB/POZ fold; IPR013089 (Kelch-related)
RirG244760	6		PF00651=>BTB/POZ domain;PF07534=>TLD;PF07707=>BTB And C-terminal Kelch;	IPR011333 (BTB/POZ fold; IPR013089 (Kelch-related)
RirG104460	6	GO:0022414=>reproductive process=>btbd9_bovin ame: full=btb poz domain-containing protein 9;GO:0044707=>single-multicellular organism process=>btbd9_bovin ame: full=btb poz domain-containing protein 9;GO:0048856=>anatomical structure development=>btbd9_bovin ame: full=btb poz domain-containing protein 9);	PF00651=>BTB/POZ domain;PF07534=>TLD;PF07707=>BTB And C-terminal Kelch;	IPR011333 (BTB/POZ fold; IPR013089 (Kelch-related)
RirG168210	6		PF00651=>BTB/POZ domain;PF07534=>TLD;PF07707=>BTB And C-terminal Kelch;	IPR011333 (BTB/POZ fold; IPR013089 (Kelch-related)
RirG141520	6		PF00651=>BTB/POZ domain;PF07707=>BTB And C-terminal Kelch;	IPR011333 (BTB/POZ fold; IPR013089 (Kelch-related)
RirG108250	6	GO:0003006=>developmental process involved in reproduction=>klh10_rat ame: full=kelch-like protein 10;GO:0005622=>intracellular=>klh10_rat ame: full=kelch-like protein 10;GO:0009987=>cellular process=>klh10_rat ame: full=kelch-like protein 10;GO:0044707=>single-multicellular organism process=>klh10_rat ame: full=kelch-like protein 10;GO:0048856=>anatomical structure development=>klh10_rat ame: fu…	PF00651=>BTB/POZ domain;PF07534=>TLD;PF07707=>BTB And C-terminal Kelch;	IPR011333 (BTB/POZ fold; IPR013089 (Kelch-related)
RirG009910	6		PF00651=>BTB/POZ domain;PF07534=>TLD;PF07707=>BTB And C-terminal Kelch;	IPR011333 (BTB/POZ fold; IPR013089 (Kelch-related)
RirG133490	6	GO:0009653=>anatomical structure morphogenesis=>btbd9_bovin ame: full=btb poz domain-containing protein 9;GO:0009987=>cellular process=>btbd9_bovin ame: full=btb poz domain-containing protein 9;GO:0048513=>organ development=>btbd9_bovin ame: full=btb poz domain-containing protein 9;GO:0048608=>reproductive structure development=>btbd9_bovin ame: full=btb poz domain-containing protein 9);	PF00651=>BTB/POZ domain;PF07534=>TLD;PF07707=>BTB And C-terminal Kelch;	IPR011333 (BTB/POZ fold; IPR013089 (Kelch-related)
RirG066760	6		PF00651=>BTB/POZ domain;PF07534=>TLD;PF07707=>BTB And C-terminal Kelch;	IPR011333 (BTB/POZ fold; IPR013089 (Kelch-related)
RirG066070	6	GO:0044424=>intracellular part=>ipp_human ame: full=actin-binding protein ipp ame: full=intracisternal a particle-promoted polypeptide short=ipp ame: full=kelch-like protein 27);	PF00651=>BTB/POZ domain;PF07534=>TLD;PF07707=>BTB And C-terminal Kelch;	IPR011333 (BTB/POZ fold; IPR013089 (Kelch-related)
RirG133450	6	GO:0003006=>developmental process involved in reproduction=>klh10_rat ame: full=kelch-like protein 10;GO:0044707=>single-multicellular organism process=>klh10_rat ame: full=kelch-like protein 10;GO:0048856=>anatomical structure development=>klh10_rat ame: full=kelch-like protein 10);	PF00651=>BTB/POZ domain;PF07534=>TLD;PF07707=>BTB And C-terminal Kelch;	IPR006571 (TLDc; IPR011333 (BTB/POZ fold; IPR013089 (Kelch-related)
RirG133540	6	GO:0003006=>developmental process involved in reproduction=>klh10_rat ame: full=kelch-like protein 10;GO:0009987=>cellular process=>klh10_rat ame: full=kelch-like protein 10;GO:0044424=>intracellular part=>klh10_rat ame: full=kelch-like protein 10;GO:0044707=>single-multicellular organism process=>klh10_rat ame: full=kelch-like protein 10;GO:0048856=>anatomical structure development=>klh10_rat am…	PF00651=>BTB/POZ domain;PF07534=>TLD;PF07707=>BTB And C-terminal Kelch;	IPR011333 (BTB/POZ fold; IPR013089 (Kelch-related)
RirG165100	6	GO:0022414=>reproductive process=>btbd9_bovin ame: full=btb poz domain-containing protein 9;GO:0044707=>single-multicellular organism process=>btbd9_bovin ame: full=btb poz domain-containing protein 9;GO:0048856=>anatomical structure development=>btbd9_bovin ame: full=btb poz domain-containing protein 9);	PF00651=>BTB/POZ domain;PF07534=>TLD;PF07707=>BTB And C-terminal Kelch;	IPR011333 (BTB/POZ fold; IPR013089 (Kelch-related)
RirG049840	6		PF00651=>BTB/POZ domain;PF07534=>TLD;PF07707=>BTB And C-terminal Kelch;	IPR011333 (BTB/POZ fold; IPR013089 (Kelch-related)
RirG250050	6	GO:0003006=>developmental process involved in reproduction=>btbd9_bovin ame: full=btb poz domain-containing protein 9;GO:0009987=>cellular process=>btbd9_bovin ame: full=btb poz domain-containing protein 9;GO:0044707=>single-multicellular organism process=>btbd9_bovin ame: full=btb poz domain-containing protein 9;GO:0048856=>anatomical structure development=>btbd9_bovin ame: full=btb poz domain-c…	PF00651=>BTB/POZ domain;PF07534=>TLD;PF07707=>BTB And C-terminal Kelch;	IPR011333 (BTB/POZ fold; IPR013089 (Kelch-related)
RirG160860	6		PF00651=>BTB/POZ domain;PF07707=>BTB And C-terminal Kelch;	IPR011333 (BTB/POZ fold; IPR013089 (Kelch-related)
RirG082220	6		PF00651=>BTB/POZ domain;PF07534=>TLD;PF07707=>BTB And C-terminal Kelch;	IPR011333 (BTB/POZ fold; IPR013089 (Kelch-related)
RirG160840	6		PF00651=>BTB/POZ domain;PF07534=>TLD;PF07707=>BTB And C-terminal Kelch;	IPR011333 (BTB/POZ fold; IPR013089 (Kelch-related)
RirG157150	6		PF00651=>BTB/POZ domain;PF07534=>TLD;PF07707=>BTB And C-terminal Kelch;	IPR011333 (BTB/POZ fold; IPR013089 (Kelch-related)
RirG046900	6		PF00651=>BTB/POZ domain;PF07534=>TLD;PF07707=>BTB And C-terminal Kelch;	IPR006571 (TLDc; IPR011333 (BTB/POZ fold; IPR013089 (Kelch-related)
RirG165780	6	GO:0009987=>cellular process=>btbd9_rat ame: full=btb poz domain-containing protein 9;GO:0044424=>intracellular part=>btbd9_rat ame: full=btb poz domain-containing protein 9);	PF00651=>BTB/POZ domain;PF07534=>TLD;PF07707=>BTB And C-terminal Kelch;	IPR011333 (BTB/POZ fold; IPR013089 (Kelch-related)
RirG082210	6	GO:0022414=>reproductive process=>btbd9_rat ame: full=btb poz domain-containing protein 9;GO:0044707=>single-multicellular organism process=>btbd9_rat ame: full=btb poz domain-containing protein 9;GO:0048856=>anatomical structure development=>btbd9_rat ame: full=btb poz domain-containing protein 9);	PF00651=>BTB/POZ domain;PF07534=>TLD;PF07707=>BTB And C-terminal Kelch;	IPR011333 (BTB/POZ fold; IPR013089 (Kelch-related)
RirG262530	6		PF00651=>BTB/POZ domain;PF07534=>TLD;PF07707=>BTB And C-terminal Kelch;	IPR011333 (BTB/POZ fold; IPR013089 (Kelch-related)
RirG160850	6	GO:0003006=>developmental process involved in reproduction=>btbd9_bovin ame: full=btb poz domain-containing protein 9;GO:0009987=>cellular process=>btbd9_bovin ame: full=btb poz domain-containing protein 9;GO:0044707=>single-multicellular organism process=>btbd9_bovin ame: full=btb poz domain-containing protein 9;GO:0048856=>anatomical structure development=>btbd9_bovin ame: full=btb poz domain-c…	PF00651=>BTB/POZ domain;PF07534=>TLD;PF07707=>BTB And C-terminal Kelch;	IPR011333 (BTB/POZ fold; IPR013089 (Kelch-related)
RirG260220	6	GO:0009987=>cellular process=>btbd9_rat ame: full=btb poz domain-containing protein 9;GO:0044424=>intracellular part=>btbd9_rat ame: full=btb poz domain-containing protein 9);	PF00651=>BTB/POZ domain;PF07534=>TLD;PF07707=>BTB And C-terminal Kelch;	IPR011333 (BTB/POZ fold; IPR013089 (Kelch-related)
RirG160820	6		PF00651=>BTB/POZ domain;PF07534=>TLD;PF07707=>BTB And C-terminal Kelch;	IPR011333 (BTB/POZ fold; IPR013089 (Kelch-related)
RirG180600	6		PF00651=>BTB/POZ domain;PF07534=>TLD;PF07707=>BTB And C-terminal Kelch;	IPR006571 (TLDc; IPR011333 (BTB/POZ fold; IPR013089 (Kelch-related)
RirG029080	6	GO:0044424=>intracellular part=>kbtba_human ame: full=kelch repeat and btb domain-containing protein 10 ame: full=kel-like protein 23 ame: full=kelch-related protein 1 ame: full=sarcosin);	PF00651=>BTB/POZ domain;PF07534=>TLD;PF07707=>BTB And C-terminal Kelch;	IPR011333 (BTB/POZ fold; IPR013089 (Kelch-related)
RirG206630	6	GO:0003006=>developmental process involved in reproduction=>btbd9_bovin ame: full=btb poz domain-containing protein 9;GO:0009987=>cellular process=>btbd9_bovin ame: full=btb poz domain-containing protein 9;GO:0044707=>single-multicellular organism process=>btbd9_bovin ame: full=btb poz domain-containing protein 9;GO:0048856=>anatomical structure development=>btbd9_bovin ame: full=btb poz domain-c…	PF00651=>BTB/POZ domain;PF07534=>TLD;PF07707=>BTB And C-terminal Kelch;	IPR011333 (BTB/POZ fold; IPR013089 (Kelch-related)
RirG165090	6		PF00651=>BTB/POZ domain;PF07707=>BTB And C-terminal Kelch;	IPR011333 (BTB/POZ fold; IPR013089 (Kelch-related)
RirG029090	6		PF00651=>BTB/POZ domain;PF07534=>TLD;PF07707=>BTB And C-terminal Kelch;	IPR011333 (BTB/POZ fold; IPR013089 (Kelch-related)
RirG160890	6		PF00651=>BTB/POZ domain;PF07534=>TLD;PF07707=>BTB And C-terminal Kelch;	IPR011333 (BTB/POZ fold; IPR013089 (Kelch-related)
RirG104470	6		PF00651=>BTB/POZ domain;PF07534=>TLD;PF07707=>BTB And C-terminal Kelch;	IPR011333 (BTB/POZ fold; IPR013089 (Kelch-related)
RirG141530	6	GO:0009987=>cellular process=>btbd9_bovin ame: full=btb poz domain-containing protein 9;GO:0044424=>intracellular part=>btbd9_bovin ame: full=btb poz domain-containing protein 9);	PF00651=>BTB/POZ domain;PF07534=>TLD;PF07707=>BTB And C-terminal Kelch;	IPR011333 (BTB/POZ fold; IPR013089 (Kelch-related)
RirG203270	6	GO:0003006=>developmental process involved in reproduction=>btbd9_bovin ame: full=btb poz domain-containing protein 9;GO:0009987=>cellular process=>btbd9_bovin ame: full=btb poz domain-containing protein 9;GO:0043229=>intracellular organelle=>btbd9_bovin ame: full=btb poz domain-containing protein 9;GO:0044707=>single-multicellular organism process=>btbd9_bovin ame: full=btb poz domain-containing…	PF00651=>BTB/POZ domain;PF07534=>TLD;	IPR006571 (TLDc; IPR011333 (BTB/POZ fold; IPR013089 (Kelch-related)
RirG191010	6	GO:0044424=>intracellular part=>kbtba_rat ame: full=kelch repeat and btb domain-containing protein 10 ame: full=kel-like protein 23 ame: full=kelch-related protein 1 ame: full=sarcosin);	PF00651=>BTB/POZ domain;PF07534=>TLD;PF07707=>BTB And C-terminal Kelch;	IPR011333 (BTB/POZ fold; IPR013089 (Kelch-related)
RirG154510	6	GO:0009987=>cellular process=>kbtba_human ame: full=kelch repeat and btb domain-containing protein 10 ame: full=kel-like protein 23 ame: full=kelch-related protein 1 ame: full=sarcosin;GO:0043229=>intracellular organelle=>kbtba_human ame: full=kelch repeat and btb domain-containing protein 10 ame: full=kel-like protein 23 ame: full=kelch-related protein 1 ame: full=sarcosin);	PF00651=>BTB/POZ domain;PF07534=>TLD;PF07707=>BTB And C-terminal Kelch;	IPR011333 (BTB/POZ fold; IPR013089 (Kelch-related)
RirG117170	6	GO:0022414=>reproductive process=>btbd9_bovin ame: full=btb poz domain-containing protein 9;GO:0044707=>single-multicellular organism process=>btbd9_bovin ame: full=btb poz domain-containing protein 9;GO:0048856=>anatomical structure development=>btbd9_bovin ame: full=btb poz domain-containing protein 9);	PF00651=>BTB/POZ domain;PF07534=>TLD;PF07707=>BTB And C-terminal Kelch;	IPR011333 (BTB/POZ fold; IPR013089 (Kelch-related)
RirG133530	6	GO:0005488=>binding=>btbd9_bovin ame: full=btb poz domain-containing protein 9;GO:0009653=>anatomical structure morphogenesis=>btbd9_bovin ame: full=btb poz domain-containing protein 9;GO:0009987=>cellular process=>btbd9_bovin ame: full=btb poz domain-containing protein 9;GO:0044424=>intracellular part=>btbd9_bovin ame: full=btb poz domain-containing protein 9;GO:0048513=>organ development=>btbd9…	PF00651=>BTB/POZ domain;PF07534=>TLD;PF07707=>BTB And C-terminal Kelch;	IPR011333 (BTB/POZ fold; IPR013089 (Kelch-related)
RirG029110	6		PF00651=>BTB/POZ domain;PF07534=>TLD;PF07707=>BTB And C-terminal Kelch;	IPR011333 (BTB/POZ fold; IPR013089 (Kelch-related)
RirG020600	6		PF00651=>BTB/POZ domain;PF07707=>BTB And C-terminal Kelch;	IPR011333 (BTB/POZ fold; IPR013089 (Kelch-related)
RirG206010	6	GO:0009987=>cellular process=>kbtba_rat ame: full=kelch repeat and btb domain-containing protein 10 ame: full=kel-like protein 23 ame: full=kelch-related protein 1 ame: full=sarcosin;GO:0022414=>reproductive process=>kbtba_rat ame: full=kelch repeat and btb domain-containing protein 10 ame: full=kel-like protein 23 ame: full=kelch-related protein 1 ame: full=sarcosin;GO:0044424=>intracellular par…	PF00651=>BTB/POZ domain;PF07534=>TLD;PF07707=>BTB And C-terminal Kelch;	IPR011333 (BTB/POZ fold; IPR013089 (Kelch-related)
RirG160790	6		PF00651=>BTB/POZ domain;PF07534=>TLD;PF07707=>BTB And C-terminal Kelch;	IPR011333 (BTB/POZ fold; IPR013089 (Kelch-related)
RirG165740	6	GO:0003006=>developmental process involved in reproduction=>klh10_human ame: full=kelch-like protein 10;GO:0044707=>single-multicellular organism process=>klh10_human ame: full=kelch-like protein 10;GO:0048856=>anatomical structure development=>klh10_human ame: full=kelch-like protein 10);	PF00651=>BTB/POZ domain;PF07534=>TLD;PF07707=>BTB And C-terminal Kelch;	IPR011333 (BTB/POZ fold; IPR013089 (Kelch-related)
RirG160870	6	GO:0009653=>anatomical structure morphogenesis=>klh10_human ame: full=kelch-like protein 10;GO:0019953=>sexual reproduction=>klh10_human ame: full=kelch-like protein 10;GO:0046546=>development of primary male sexual characteristics=>klh10_human ame: full=kelch-like protein 10;GO:0048513=>organ development=>klh10_human ame: full=kelch-like protein 10;GO:0048608=>reproductive structure development=…	PF00651=>BTB/POZ domain;PF07534=>TLD;PF07707=>BTB And C-terminal Kelch;	IPR011333 (BTB/POZ fold; IPR013089 (Kelch-related)
RirG104440	6		PF00651=>BTB/POZ domain;PF07534=>TLD;PF07707=>BTB And C-terminal Kelch;	IPR011333 (BTB/POZ fold; IPR013089 (Kelch-related)
RirG046870	6		PF00651=>BTB/POZ domain;PF07707=>BTB And C-terminal Kelch;	IPR011333 (BTB/POZ fold; IPR013089 (Kelch-related)
RirG175070	6		PF00651=>BTB/POZ domain;PF07534=>TLD;PF07707=>BTB And C-terminal Kelch;	IPR011333 (BTB/POZ fold; IPR013089 (Kelch-related)
RirG115650	6		PF00651=>BTB/POZ domain;PF07534=>TLD;PF07707=>BTB And C-terminal Kelch;	IPR006571 (TLDc; IPR011333 (BTB/POZ fold; IPR013089 (Kelch-related)
RirG140290	6	GO:0022414=>reproductive process=>btbd9_bovin ame: full=btb poz domain-containing protein 9;GO:0044707=>single-multicellular organism process=>btbd9_bovin ame: full=btb poz domain-containing protein 9;GO:0048856=>anatomical structure development=>btbd9_bovin ame: full=btb poz domain-containing protein 9);	PF00651=>BTB/POZ domain;PF07534=>TLD;PF07707=>BTB And C-terminal Kelch;	IPR011333 (BTB/POZ fold; IPR013089 (Kelch-related)
RirG180570	6		PF00651=>BTB/POZ domain;PF07534=>TLD;PF07707=>BTB And C-terminal Kelch;	IPR011333 (BTB/POZ fold; IPR013089 (Kelch-related)
RirG160830	6		PF00651=>BTB/POZ domain;PF07534=>TLD;PF07707=>BTB And C-terminal Kelch;	IPR011333 (BTB/POZ fold; IPR013089 (Kelch-related)
RirG098470	6		PF00651=>BTB/POZ domain;PF07534=>TLD;PF07707=>BTB And C-terminal Kelch;	IPR011333 (BTB/POZ fold; IPR013089 (Kelch-related)
RirG046890	6		PF00651=>BTB/POZ domain;PF07534=>TLD;	IPR011333 (BTB/POZ fold; IPR013089 (Kelch-related)
RirG260230	6	GO:0003006=>developmental process involved in reproduction=>btbd9_rat ame: full=btb poz domain-containing protein 9;GO:0009987=>cellular process=>btbd9_rat ame: full=btb poz domain-containing protein 9;GO:0044707=>single-multicellular organism process=>btbd9_rat ame: full=btb poz domain-containing protein 9;GO:0048856=>anatomical structure development=>btbd9_rat ame: full=btb poz domain-containin…	PF00651=>BTB/POZ domain;PF07534=>TLD;PF07707=>BTB And C-terminal Kelch;	IPR011333 (BTB/POZ fold; IPR013089 (Kelch-related)
RirG175080	6	GO:0003006=>developmental process involved in reproduction=>klh10_rat ame: full=kelch-like protein 10;GO:0009987=>cellular process=>klh10_rat ame: full=kelch-like protein 10;GO:0044707=>single-multicellular organism process=>klh10_rat ame: full=kelch-like protein 10;GO:0048856=>anatomical structure development=>klh10_rat ame: full=kelch-like protein 10);	PF00651=>BTB/POZ domain;PF07534=>TLD;PF07707=>BTB And C-terminal Kelch;	IPR011333 (BTB/POZ fold; IPR013089 (Kelch-related)
RirG154530	6		PF00651=>BTB/POZ domain;PF07534=>TLD;PF07707=>BTB And C-terminal Kelch;	IPR011333 (BTB/POZ fold; IPR013089 (Kelch-related)
RirG136500	6		PF00651=>BTB/POZ domain;PF07534=>TLD;PF07707=>BTB And C-terminal Kelch;	IPR011333 (BTB/POZ fold; IPR013089 (Kelch-related)
RirG113660	6		PF00651=>BTB/POZ domain;PF07534=>TLD;PF07707=>BTB And C-terminal Kelch;	IPR011333 (BTB/POZ fold; IPR013089 (Kelch-related)
RirG146230	6	GO:0003006=>developmental process involved in reproduction=>klh10_rat ame: full=kelch-like protein 10;GO:0005488=>binding=>klh10_rat ame: full=kelch-like protein 10;GO:0009987=>cellular process=>klh10_rat ame: full=kelch-like protein 10;GO:0016043=>cellular component organization=>klh10_rat ame: full=kelch-like protein 10;GO:0043229=>intracellular organelle=>klh10_rat ame: full=kelch-like protein…	PF00651=>BTB/POZ domain;PF07534=>TLD;PF07707=>BTB And C-terminal Kelch;	IPR011333 (BTB/POZ fold; IPR013089 (Kelch-related)
RirG168440	6		PF00651=>BTB/POZ domain;	IPR011333 (BTB/POZ fold; IPR013089 (Kelch-related)
RirG017850	6		PF00651=>BTB/POZ domain;PF07534=>TLD;PF07707=>BTB And C-terminal Kelch;	IPR011333 (BTB/POZ fold; IPR013089 (Kelch-related)
RirG021420	6	GO:0003006=>developmental process involved in reproduction=>klh10_rat ame: full=kelch-like protein 10;GO:0005488=>binding=>klh10_rat ame: full=kelch-like protein 10;GO:0009987=>cellular process=>klh10_rat ame: full=kelch-like protein 10;GO:0044424=>intracellular part=>klh10_rat ame: full=kelch-like protein 10;GO:0044707=>single-multicellular organism process=>klh10_rat ame: full=kelch-like protei…	PF00651=>BTB/POZ domain;PF07534=>TLD;PF07707=>BTB And C-terminal Kelch;	IPR011333 (BTB/POZ fold; IPR013089 (Kelch-related)
RirG154800	6		PF00651=>BTB/POZ domain;PF07534=>TLD;PF07707=>BTB And C-terminal Kelch;	IPR011333 (BTB/POZ fold; IPR013089 (Kelch-related)
RirG191620	6	GO:0009987=>cellular process=>kbtba_human ame: full=kelch repeat and btb domain-containing protein 10 ame: full=kel-like protein 23 ame: full=kelch-related protein 1 ame: full=sarcosin;GO:0044424=>intracellular part=>kbtba_human ame: full=kelch repeat and btb domain-containing protein 10 ame: full=kel-like protein 23 ame: full=kelch-related protein 1 ame: full=sarcosin);	PF00651=>BTB/POZ domain;PF07534=>TLD;PF07707=>BTB And C-terminal Kelch;	IPR011333 (BTB/POZ fold; IPR013089 (Kelch-related)
RirG088350	6		PF00651=>BTB/POZ domain;PF07707=>BTB And C-terminal Kelch;	IPR011333 (BTB/POZ fold; IPR013089 (Kelch-related)
RirG116190	6	GO:0005737=>cytoplasm=>btbd9_human ame: full=btb poz domain-containing protein 9;GO:0009653=>anatomical structure morphogenesis=>btbd9_human ame: full=btb poz domain-containing protein 9;GO:0019953=>sexual reproduction=>btbd9_human ame: full=btb poz domain-containing protein 9;GO:0042995=>cell projection=>btbd9_human ame: full=btb poz domain-containing protein 9;GO:0043232=>intracellular non-memb…	PF00651=>BTB/POZ domain;PF07534=>TLD;PF07707=>BTB And C-terminal Kelch;	IPR011333 (BTB/POZ fold; IPR013089 (Kelch-related)
RirG017080	6		PF00651=>BTB/POZ domain;PF07534=>TLD;PF07707=>BTB And C-terminal Kelch;	IPR011333 (BTB/POZ fold; IPR013089 (Kelch-related)
RirG185720	6	GO:0003006=>developmental process involved in reproduction=>kbtba_rat ame: full=kelch repeat and btb domain-containing protein 10 ame: full=kel-like protein 23 ame: full=kelch-related protein 1 ame: full=sarcosin;GO:0009987=>cellular process=>kbtba_rat ame: full=kelch repeat and btb domain-containing protein 10 ame: full=kel-like protein 23 ame: full=kelch-related protein 1 ame: full=sarcosin;GO:…	PF00651=>BTB/POZ domain;PF07534=>TLD;PF07707=>BTB And C-terminal Kelch;	IPR011333 (BTB/POZ fold; IPR013089 (Kelch-related)
RirG046880	6	GO:0003006=>developmental process involved in reproduction=>btbd9_bovin ame: full=btb poz domain-containing protein 9;GO:0009987=>cellular process=>btbd9_bovin ame: full=btb poz domain-containing protein 9;GO:0044424=>intracellular part=>btbd9_bovin ame: full=btb poz domain-containing protein 9;GO:0044707=>single-multicellular organism process=>btbd9_bovin ame: full=btb poz domain-containing prot…	PF00651=>BTB/POZ domain;PF07707=>BTB And C-terminal Kelch;	IPR011333 (BTB/POZ fold; IPR013089 (Kelch-related)
RirG213670	6	GO:0022414=>reproductive process=>ipp_human ame: full=actin-binding protein ipp ame: full=intracisternal a particle-promoted polypeptide short=ipp ame: full=kelch-like protein 27;GO:0044707=>single-multicellular organism process=>ipp_human ame: full=actin-binding protein ipp ame: full=intracisternal a particle-promoted polypeptide short=ipp ame: full=kelch-like protein 27;GO:0048856=>anatomical s…	PF00651=>BTB/POZ domain;PF07534=>TLD;PF07707=>BTB And C-terminal Kelch;	IPR011333 (BTB/POZ fold; IPR013089 (Kelch-related)
RirG175030	6	GO:0009987=>cellular process=>kbtba_rat ame: full=kelch repeat and btb domain-containing protein 10 ame: full=kel-like protein 23 ame: full=kelch-related protein 1 ame: full=sarcosin;GO:0044424=>intracellular part=>kbtba_rat ame: full=kelch repeat and btb domain-containing protein 10 ame: full=kel-like protein 23 ame: full=kelch-related protein 1 ame: full=sarcosin);	PF00651=>BTB/POZ domain;PF07534=>TLD;PF07707=>BTB And C-terminal Kelch;	IPR011333 (BTB/POZ fold; IPR013089 (Kelch-related)
RirG175060	6		PF00651=>BTB/POZ domain;PF07534=>TLD;PF07707=>BTB And C-terminal Kelch;	IPR011333 (BTB/POZ fold; IPR013089 (Kelch-related)
RirG053110	6	GO:0009987=>cellular process=>kbtba_rat ame: full=kelch repeat and btb domain-containing protein 10 ame: full=kel-like protein 23 ame: full=kelch-related protein 1 ame: full=sarcosin;GO:0022414=>reproductive process=>kbtba_rat ame: full=kelch repeat and btb domain-containing protein 10 ame: full=kel-like protein 23 ame: full=kelch-related protein 1 ame: full=sarcosin;GO:0043229=>intracellular org…	PF00651=>BTB/POZ domain;PF07707=>BTB And C-terminal Kelch;	IPR011333 (BTB/POZ fold; IPR013089 (Kelch-related)
RirG139520	6		PF00651=>BTB/POZ domain;PF07534=>TLD;PF07707=>BTB And C-terminal Kelch;	IPR011333 (BTB/POZ fold; IPR013089 (Kelch-related)
RirG017860	6		PF00651=>BTB/POZ domain;PF07534=>TLD;PF07707=>BTB And C-terminal Kelch;	IPR011333 (BTB/POZ fold; IPR013089 (Kelch-related)
RirG175050	6	GO:0009987=>cellular process=>kbtba_rat ame: full=kelch repeat and btb domain-containing protein 10 ame: full=kel-like protein 23 ame: full=kelch-related protein 1 ame: full=sarcosin;GO:0044424=>intracellular part=>kbtba_rat ame: full=kelch repeat and btb domain-containing protein 10 ame: full=kel-like protein 23 ame: full=kelch-related protein 1 ame: full=sarcosin);	PF00651=>BTB/POZ domain;PF07534=>TLD;PF07707=>BTB And C-terminal Kelch;	IPR011333 (BTB/POZ fold; IPR013089 (Kelch-related)
RirG156790	6	GO:0044424=>intracellular part=>kbtba_human ame: full=kelch repeat and btb domain-containing protein 10 ame: full=kel-like protein 23 ame: full=kelch-related protein 1 ame: full=sarcosin);	PF00651=>BTB/POZ domain;PF07534=>TLD;PF07707=>BTB And C-terminal Kelch;	IPR011333 (BTB/POZ fold; IPR013089 (Kelch-related)
RirG072880	6	GO:0009987=>cellular process=>btbd9_bovin ame: full=btb poz domain-containing protein 9;GO:0043232=>intracellular non-membrane-bounded organelle=>btbd9_bovin ame: full=btb poz domain-containing protein 9);	PF00651=>BTB/POZ domain;PF07534=>TLD;PF07707=>BTB And C-terminal Kelch;	IPR011333 (BTB/POZ fold; IPR013089 (Kelch-related)
RirG240220	6		PF00651=>BTB/POZ domain;PF07534=>TLD;PF07707=>BTB And C-terminal Kelch;	IPR011333 (BTB/POZ fold; IPR013089 (Kelch-related)
RirG175040	6		PF00651=>BTB/POZ domain;PF07534=>TLD;PF07707=>BTB And C-terminal Kelch;	IPR011333 (BTB/POZ fold; IPR013089 (Kelch-related)
RirG141030	6		PF00651=>BTB/POZ domain;PF07707=>BTB And C-terminal Kelch;	IPR011333 (BTB/POZ fold; IPR013089 (Kelch-related)
RirG136460	6		PF00651=>BTB/POZ domain;PF07534=>TLD;PF07707=>BTB And C-terminal Kelch;	IPR011333 (BTB/POZ fold; IPR013089 (Kelch-related)
RirG215220	6	GO:0022414=>reproductive process=>btbd9_rat ame: full=btb poz domain-containing protein 9;GO:0044707=>single-multicellular organism process=>btbd9_rat ame: full=btb poz domain-containing protein 9;GO:0048856=>anatomical structure development=>btbd9_rat ame: full=btb poz domain-containing protein 9);	PF00651=>BTB/POZ domain;PF07534=>TLD;PF07707=>BTB And C-terminal Kelch;	IPR011333 (BTB/POZ fold; IPR013089 (Kelch-related)
RirG072890	6		PF00651=>BTB/POZ domain;PF07534=>TLD;PF07707=>BTB And C-terminal Kelch;	IPR011333 (BTB/POZ fold; IPR013089 (Kelch-related)
RirG213630	6	GO:0022414=>reproductive process=>ipp_human ame: full=actin-binding protein ipp ame: full=intracisternal a particle-promoted polypeptide short=ipp ame: full=kelch-like protein 27;GO:0044707=>single-multicellular organism process=>ipp_human ame: full=actin-binding protein ipp ame: full=intracisternal a particle-promoted polypeptide short=ipp ame: full=kelch-like protein 27;GO:0048856=>anatomical s…	PF00651=>BTB/POZ domain;PF07534=>TLD;	IPR011333 (BTB/POZ fold; IPR013089 (Kelch-related)
RirG165790	6	GO:0003006=>developmental process involved in reproduction=>btbd9_bovin ame: full=btb poz domain-containing protein 9;GO:0009987=>cellular process=>btbd9_bovin ame: full=btb poz domain-containing protein 9;GO:0044424=>intracellular part=>btbd9_bovin ame: full=btb poz domain-containing protein 9;GO:0044707=>single-multicellular organism process=>btbd9_bovin ame: full=btb poz domain-containing prot…	PF00651=>BTB/POZ domain;PF07707=>BTB And C-terminal Kelch;	IPR011333 (BTB/POZ fold; IPR013089 (Kelch-related)
RirG182230	6		PF00651=>BTB/POZ domain;PF07534=>TLD;PF07707=>BTB And C-terminal Kelch;	IPR011333 (BTB/POZ fold; IPR013089 (Kelch-related)
RirG247580	6	GO:0009987=>cellular process=>kbtba_rat ame: full=kelch repeat and btb domain-containing protein 10 ame: full=kel-like protein 23 ame: full=kelch-related protein 1 ame: full=sarcosin;GO:0044424=>intracellular part=>kbtba_rat ame: full=kelch repeat and btb domain-containing protein 10 ame: full=kel-like protein 23 ame: full=kelch-related protein 1 ame: full=sarcosin);	PF00651=>BTB/POZ domain;PF07534=>TLD;PF07707=>BTB And C-terminal Kelch;	IPR011333 (BTB/POZ fold; IPR013089 (Kelch-related)
RirG046860	6	GO:0003006=>developmental process involved in reproduction=>btbd9_rat ame: full=btb poz domain-containing protein 9;GO:0005488=>binding=>btbd9_rat ame: full=btb poz domain-containing protein 9;GO:0009987=>cellular process=>btbd9_rat ame: full=btb poz domain-containing protein 9;GO:0043229=>intracellular organelle=>btbd9_rat ame: full=btb poz domain-containing protein 9;GO:0044707=>single-multicel…	PF00651=>BTB/POZ domain;PF07707=>BTB And C-terminal Kelch;	IPR011333 (BTB/POZ fold; IPR013089 (Kelch-related)
RirG213690	6		PF00651=>BTB/POZ domain;PF07534=>TLD;PF07707=>BTB And C-terminal Kelch;	IPR011333 (BTB/POZ fold; IPR013089 (Kelch-related)
RirG073380	6	GO:0009987=>cellular process=>btbd9_human ame: full=btb poz domain-containing protein 9;GO:0044424=>intracellular part=>btbd9_human ame: full=btb poz domain-containing protein 9);	PF00651=>BTB/POZ domain;PF07534=>TLD;PF07707=>BTB And C-terminal Kelch;	IPR011333 (BTB/POZ fold; IPR013089 (Kelch-related)
RirG260210	6		PF00651=>BTB/POZ domain;PF07534=>TLD;PF07707=>BTB And C-terminal Kelch;	IPR011333 (BTB/POZ fold; IPR013089 (Kelch-related)
RirG160210	6		PF07534=>TLD;PF07707=>BTB And C-terminal Kelch;	IPR011333 (BTB/POZ fold; IPR013089 (Kelch-related)
RirG114210	6		PF00651=>BTB/POZ domain;PF07534=>TLD;PF07707=>BTB And C-terminal Kelch;	IPR011333 (BTB/POZ fold; IPR013089 (Kelch-related)
RirG150550	6	GO:0001726=>ruffle=>rab5c_bovin ame: full=ras-related protein rab-5c;GO:0003677=>DNA binding=>rab5c_bovin ame: full=ras-related protein rab-5c;GO:0003924=>GTPase activity=>rab5c_bovin ame: full=ras-related protein rab-5c;GO:0005525=>GTP binding=>rab5c_bovin ame: full=ras-related protein rab-5c;GO:0005769=>early endosome=>rab5c_bovin ame: full=ras-related protein rab-5c;GO:0005774=>vacuolar membra…	PF00071=>Ras family;PF00651=>BTB/POZ domain;	IPR005225 (Small GTP-binding protein; IPR011333 (BTB/POZ fold)
RirG203220	6		PF00651=>BTB/POZ domain;PF07534=>TLD;PF07707=>BTB And C-terminal Kelch;	IPR011333 (BTB/POZ fold; IPR013089 (Kelch-related)
RirG203230	6		PF00651=>BTB/POZ domain;PF07534=>TLD;PF07707=>BTB And C-terminal Kelch;	IPR011333 (BTB/POZ fold; IPR013089 (Kelch-related)
RirG015860	6		PF07534=>TLD;PF07707=>BTB And C-terminal Kelch;	IPR013089 (Kelch-related)
RirG203240	6		PF00651=>BTB/POZ domain;PF07534=>TLD;PF07707=>BTB And C-terminal Kelch;	IPR011333 (BTB/POZ fold; IPR013089 (Kelch-related)
RirG203280	6		PF00651=>BTB/POZ domain;PF07707=>BTB And C-terminal Kelch;	IPR011333 (BTB/POZ fold; IPR013089 (Kelch-related)
RirG172020	6		PF00651=>BTB/POZ domain;PF07707=>BTB And C-terminal Kelch;	IPR011333 (BTB/POZ fold; IPR013089 (Kelch-related)
RirG199800	6		PF07534=>TLD;	IPR013089 (Kelch-related)
RirG152690	6		PF00651=>BTB/POZ domain;PF07707=>BTB And C-terminal Kelch;	IPR011333 (BTB/POZ fold; IPR013089 (Kelch-related)
RirG171020	6		PF00651=>BTB/POZ domain;PF07534=>TLD;PF07707=>BTB And C-terminal Kelch;	IPR011333 (BTB/POZ fold; IPR013089 (Kelch-related)
RirG265750	6		PF07534=>TLD;PF07707=>BTB And C-terminal Kelch;	IPR011705 (BTB/Kelch-associated)
RirG160910	6		PF07534=>TLD;PF07707=>BTB And C-terminal Kelch;	IPR013089 (Kelch-related)
RirG046350	6		PF07534=>TLD;PF07707=>BTB And C-terminal Kelch;	IPR011705 (BTB/Kelch-associated)
RirG096740	6		PF00651=>BTB/POZ domain;PF07534=>TLD;	IPR011333 (BTB/POZ fold; IPR013089 (Kelch-related)
RirG141940	6		PF00651=>BTB/POZ domain;PF07534=>TLD;	IPR011333 (BTB/POZ fold; IPR013089 (Kelch-related)
RirG141510	6		PF00651=>BTB/POZ domain;PF07707=>BTB And C-terminal Kelch;	IPR011333 (BTB/POZ fold; IPR013089 (Kelch-related)
RirG001170	6		PF00651=>BTB/POZ domain;PF07534=>TLD;PF07707=>BTB And C-terminal Kelch;	IPR011333 (BTB/POZ fold; IPR013089 (Kelch-related)
RirG014420	6		PF00651=>BTB/POZ domain;PF07534=>TLD;PF07707=>BTB And C-terminal Kelch;	IPR011333 (BTB/POZ fold; IPR013089 (Kelch-related)
RirG013420	6		PF00651=>BTB/POZ domain;PF07534=>TLD;	IPR006571 (TLDc; IPR011333 (BTB/POZ fold; IPR013089 (Kelch-related)
RirG004290	6		PF00651=>BTB/POZ domain;PF07534=>TLD;	IPR011333 (BTB/POZ fold; IPR013089 (Kelch-related)
RirG004810	6		PF00651=>BTB/POZ domain;PF07534=>TLD;PF07707=>BTB And C-terminal Kelch;	IPR011333 (BTB/POZ fold; IPR013089 (Kelch-related)
RirG016810	6	GO:0005488=>binding=>btbd9_rat ame: full=btb poz domain-containing protein 9;GO:0009987=>cellular process=>btbd9_rat ame: full=btb poz domain-containing protein 9;GO:0044424=>intracellular part=>btbd9_rat ame: full=btb poz domain-containing protein 9);	PF00651=>BTB/POZ domain;PF07534=>TLD;PF07707=>BTB And C-terminal Kelch;	IPR006571 (TLDc; IPR011333 (BTB/POZ fold; IPR013089 (Kelch-related)
RirG004820	6		PF00651=>BTB/POZ domain;PF07534=>TLD;PF07707=>BTB And C-terminal Kelch;	IPR011333 (BTB/POZ fold; IPR013089 (Kelch-related)
RirG016840	6	GO:0005488=>binding=>kbtba_human ame: full=kelch repeat and btb domain-containing protein 10 ame: full=kel-like protein 23 ame: full=kelch-related protein 1 ame: full=sarcosin;GO:0009987=>cellular process=>kbtba_human ame: full=kelch repeat and btb domain-containing protein 10 ame: full=kel-like protein 23 ame: full=kelch-related protein 1 ame: full=sarcosin;GO:0044424=>intracellular part=>kbtba_…	PF00651=>BTB/POZ domain;PF07534=>TLD;PF07707=>BTB And C-terminal Kelch;	IPR011333 (BTB/POZ fold; IPR013089 (Kelch-related)
RirG021360	6	GO:0009987=>cellular process=>btbd9_rat ame: full=btb poz domain-containing protein 9;GO:0044424=>intracellular part=>btbd9_rat ame: full=btb poz domain-containing protein 9);	PF00651=>BTB/POZ domain;PF07534=>TLD;PF07707=>BTB And C-terminal Kelch;	IPR011333 (BTB/POZ fold; IPR013089 (Kelch-related)
RirG017730	6		PF00651=>BTB/POZ domain;PF07534=>TLD;PF07707=>BTB And C-terminal Kelch;	IPR011333 (BTB/POZ fold; IPR013089 (Kelch-related)
RirG025290	6		PF00651=>BTB/POZ domain;PF07534=>TLD;PF07707=>BTB And C-terminal Kelch;	IPR011333 (BTB/POZ fold; IPR013089 (Kelch-related)
RirG004830	6	GO:0005488=>binding=>kbtb5_xentr ame: full=kelch repeat and btb domain-containing protein 5;GO:0009987=>cellular process=>kbtb5_xentr ame: full=kelch repeat and btb domain-containing protein 5;GO:0044424=>intracellular part=>kbtb5_xentr ame: full=kelch repeat and btb domain-containing protein 5);	PF00651=>BTB/POZ domain;PF07707=>BTB And C-terminal Kelch;	IPR011333 (BTB/POZ fold; IPR013089 (Kelch-related)
RirG017250	6	GO:0005515=>protein binding=>btbd9_human ame: full=btb poz domain-containing protein 9;GO:0005634=>nucleus=>btbd9_human ame: full=btb poz domain-containing protein 9;GO:0043232=>intracellular non-membrane-bounded organelle=>btbd9_human ame: full=btb poz domain-containing protein 9;GO:0044238=>primary metabolic process=>btbd9_human ame: full=btb poz domain-containing protein 9;GO:0044260=>cellular…	PF00651=>BTB/POZ domain;PF07534=>TLD;PF07707=>BTB And C-terminal Kelch;	IPR011333 (BTB/POZ fold; IPR013089 (Kelch-related)
RirG027260	6	GO:0005488=>binding=>btbd9_human ame: full=btb poz domain-containing protein 9;GO:0009987=>cellular process=>btbd9_human ame: full=btb poz domain-containing protein 9);	PF00651=>BTB/POZ domain;PF07534=>TLD;PF07707=>BTB And C-terminal Kelch;	IPR006571 (TLDc; IPR011333 (BTB/POZ fold; IPR013089 (Kelch-related)
RirG160930	6		PF07534=>TLD;PF07707=>BTB And C-terminal Kelch;	IPR011705 (BTB/Kelch-associated)
RirG020610	6		PF07534=>TLD;PF07707=>BTB And C-terminal Kelch;	IPR011705 (BTB/Kelch-associated)
RirG049680	6		PF07534=>TLD;PF07707=>BTB And C-terminal Kelch;	IPR011705 (BTB/Kelch-associated)
RirG026350	6		PF07534=>TLD;PF07707=>BTB And C-terminal Kelch;	IPR011705 (BTB/Kelch-associated)
RirG029070	6		PF07534=>TLD;PF07707=>BTB And C-terminal Kelch;	IPR013089 (Kelch-related)
RirG154760	6		PF07534=>TLD;PF07707=>BTB And C-terminal Kelch;	IPR011705 (BTB/Kelch-associated)
RirG037280	6		PF00651=>BTB/POZ domain;PF07534=>TLD;	IPR011333 (BTB/POZ fold; IPR013089 (Kelch-related)
RirG192420	6		PF00651=>BTB/POZ domain;PF07534=>TLD;	IPR011333 (BTB/POZ fold; IPR013089 (Kelch-related)
RirG008980	6	GO:0044424=>intracellular part=>kbtba_human ame: full=kelch repeat and btb domain-containing protein 10 ame: full=kel-like protein 23 ame: full=kelch-related protein 1 ame: full=sarcosin);	PF00651=>BTB/POZ domain;PF07534=>TLD;PF07707=>BTB And C-terminal Kelch;	IPR011333 (BTB/POZ fold; IPR013089 (Kelch-related)
RirG112760	7	GO:0001816=>cytokine production=>y9863_dicdi ame: full=probable serine threonine-protein kinase ddb_g0281745;GO:0003006=>developmental process involved in reproduction=>y9863_dicdi ame: full=probable serine threonine-protein kinase ddb_g0281745;GO:0004714=>transmembrane receptor protein tyrosine kinase activity=>y9863_dicdi ame: full=probable serine threonine-protein kinase ddb_g0281745;GO:000552…	PF07714=>Protein tyrosine kinase;PF08238=>Sel1 repeat;	IPR011009 (Protein kinase-like domain; IPR011990 (Tetratricopeptide-like helical)
RirG213750	7	GO:0001819=>positive regulation of cytokine production=>y9957_dicdi ame: full=probable serine threonine-protein kinase ddb_g0276181;GO:0002224=>toll-like receptor signaling pathway=>y9957_dicdi ame: full=probable serine threonine-protein kinase ddb_g0276181;GO:0004672=>protein kinase activity=>y9957_dicdi ame: full=probable serine threonine-protein kinase ddb_g0276181;GO:0005515=>protein binding=…	PF00069=>Protein kinase domain;	IPR011009 (Protein kinase-like domain)
RirG239160	7	GO:0004674=>protein serine/threonine kinase activity=>yr826_mimiv ame: full= serine threonine-protein kinase receptor r826 flags: precursor;GO:0005622=>intracellular=>yr826_mimiv ame: full= serine threonine-protein kinase receptor r826 flags: precursor;GO:0007050=>cell cycle arrest=>yr826_mimiv ame: full= serine threonine-protein kinase receptor r826 flags: precursor;GO:0007254=>JNK cascade=>yr82…	PF00069=>Protein kinase domain;	IPR011009 (Protein kinase-like domain)
RirG214610	7	GO:0004674=>protein serine/threonine kinase activity=>yr826_mimiv ame: full= serine threonine-protein kinase receptor r826 flags: precursor;GO:0012501=>programmed cell death=>yr826_mimiv ame: full= serine threonine-protein kinase receptor r826 flags: precursor;GO:0019899=>enzyme binding=>yr826_mimiv ame: full= serine threonine-protein kinase receptor r826 flags: precursor;GO:0032147=>activation o…	PF00069=>Protein kinase domain;	IPR011009 (Protein kinase-like domain)
RirG125150	7		PF00069=>Protein kinase domain;	IPR011009 (Protein kinase-like domain)
RirG171490	7	GO:0004674=>protein serine/threonine kinase activity=>gdt4_dicdi ame: full=probable serine threonine-protein kinase gdt4 ame: full=growth-differentiation transition protein 4 flags: precursor;GO:0005622=>intracellular=>gdt4_dicdi ame: full=probable serine threonine-protein kinase gdt4 ame: full=growth-differentiation transition protein 4 flags: precursor;GO:0006139=>nucleobase-containing compound…	PF00069=>Protein kinase domain;	IPR011009 (Protein kinase-like domain)
RirG149890	7	GO:0001819=>positive regulation of cytokine production=>yr831_mimiv ame: full= serine threonine-protein kinase receptor r831 flags: precursor;GO:0002224=>toll-like receptor signaling pathway=>yr831_mimiv ame: full= serine threonine-protein kinase receptor r831 flags: precursor;GO:0004672=>protein kinase activity=>yr831_mimiv ame: full= serine threonine-protein kinase receptor r831 flags: precurso…	PF00069=>Protein kinase domain;	IPR011009 (Protein kinase-like domain)
RirG210550	7	GO:0002224=>toll-like receptor signaling pathway=>pyk3_dicdi ame: full=dual specificity protein kinase pyk3 ame: full=tyrosine-protein kinase 3;GO:0004672=>protein kinase activity=>pyk3_dicdi ame: full=dual specificity protein kinase pyk3 ame: full=tyrosine-protein kinase 3;GO:0005488=>binding=>pyk3_dicdi ame: full=dual specificity protein kinase pyk3 ame: full=tyrosine-protein kinase 3;GO:000573…	PF07714=>Protein tyrosine kinase;	IPR011009 (Protein kinase-like domain)
RirG157370	7	GO:0000165=>MAPK cascade=>phg2_dicdi ame: full=serine threonine-protein kinase phg2;GO:0004674=>protein serine/threonine kinase activity=>phg2_dicdi ame: full=serine threonine-protein kinase phg2;GO:0006468=>protein phosphorylation=>phg2_dicdi ame: full=serine threonine-protein kinase phg2;GO:0006915=>apoptotic process=>phg2_dicdi ame: full=serine threonine-protein kinase phg2;GO:0019899=>enzyme …	PF07714=>Protein tyrosine kinase;	IPR011009 (Protein kinase-like domain)
RirG191630	7	GO:0002224=>toll-like receptor signaling pathway=>yr831_mimiv ame: full= serine threonine-protein kinase receptor r831 flags: precursor;GO:0004674=>protein serine/threonine kinase activity=>yr831_mimiv ame: full= serine threonine-protein kinase receptor r831 flags: precursor;GO:0006355=>regulation of transcription, DNA-dependent=>yr831_mimiv ame: full= serine threonine-protein kinase receptor r83…	PF07714=>Protein tyrosine kinase;	IPR011009 (Protein kinase-like domain)
RirG202740	7	GO:0002224=>toll-like receptor signaling pathway=>phg2_dicdi ame: full=serine threonine-protein kinase phg2;GO:0004672=>protein kinase activity=>phg2_dicdi ame: full=serine threonine-protein kinase phg2;GO:0005488=>binding=>phg2_dicdi ame: full=serine threonine-protein kinase phg2;GO:0005737=>cytoplasm=>phg2_dicdi ame: full=serine threonine-protein kinase phg2;GO:0007049=>cell cycle=>phg2_dicdi a…	PF07714=>Protein tyrosine kinase;	IPR011009 (Protein kinase-like domain)
RirG208490	7		PF00069=>Protein kinase domain;	IPR011009 (Protein kinase-like domain)
RirG239180	7	GO:0001819=>positive regulation of cytokine production=>phg2_dicdi ame: full=serine threonine-protein kinase phg2;GO:0002224=>toll-like receptor signaling pathway=>phg2_dicdi ame: full=serine threonine-protein kinase phg2;GO:0005515=>protein binding=>phg2_dicdi ame: full=serine threonine-protein kinase phg2;GO:0006139=>nucleobase-containing compound metabolic process=>phg2_dicdi ame: full=serine …	PF07714=>Protein tyrosine kinase;	IPR011009 (Protein kinase-like domain)
RirG196840	7	GO:0001819=>positive regulation of cytokine production=>y9963_dicdi ame: full=probable serine threonine-protein kinase ddb_g0272254;GO:0002224=>toll-like receptor signaling pathway=>y9963_dicdi ame: full=probable serine threonine-protein kinase ddb_g0272254;GO:0004672=>protein kinase activity=>y9963_dicdi ame: full=probable serine threonine-protein kinase ddb_g0272254;GO:0005886=>plasma membrane=…	PF00069=>Protein kinase domain;	IPR011009 (Protein kinase-like domain)
RirG199480	7	GO:0002224=>toll-like receptor signaling pathway=>roco4_dicdi ame: full=probable serine threonine-protein kinase roco4 ame: full=ras of complex proteins and c-terminal of roc 4;GO:0004672=>protein kinase activity=>roco4_dicdi ame: full=probable serine threonine-protein kinase roco4 ame: full=ras of complex proteins and c-terminal of roc 4;GO:0005488=>binding=>roco4_dicdi ame: full=probable serine…	PF07714=>Protein tyrosine kinase;	IPR011009 (Protein kinase-like domain)
RirG268110	7	GO:0002224=>toll-like receptor signaling pathway=>yr818_mimiv ame: full= serine threonine-protein kinase receptor r818 flags: precursor;GO:0004674=>protein serine/threonine kinase activity=>yr818_mimiv ame: full= serine threonine-protein kinase receptor r818 flags: precursor;GO:0005488=>binding=>yr818_mimiv ame: full= serine threonine-protein kinase receptor r818 flags: precursor;GO:0006139=>nucl…	PF00069=>Protein kinase domain;	IPR011009 (Protein kinase-like domain)
RirG205760	7	GO:0004674=>protein serine/threonine kinase activity=>y9963_dicdi ame: full=probable serine threonine-protein kinase ddb_g0272254;GO:0005488=>binding=>y9963_dicdi ame: full=probable serine threonine-protein kinase ddb_g0272254;GO:0005737=>cytoplasm=>y9963_dicdi ame: full=probable serine threonine-protein kinase ddb_g0272254;GO:0009966=>regulation of signal transduction=>y9963_dicdi ame: full=prob…	PF00069=>Protein kinase domain;	IPR011009 (Protein kinase-like domain)
RirG250100	7	GO:0005515=>protein binding=>pats1_dicdi ame: full=probable serine threonine-protein kinase pats1 ame: full=protein associated with the transduction of signal 1;GO:0010646=>regulation of cell communication=>pats1_dicdi ame: full=probable serine threonine-protein kinase pats1 ame: full=protein associated with the transduction of signal 1;GO:0010942=>positive regulation of cell death=>pats1_dicdi a…	PF07714=>Protein tyrosine kinase;	IPR011009 (Protein kinase-like domain)
RirG197970	7			IPR011009 (Protein kinase-like domain)
RirG217310	7	GO:0004672=>protein kinase activity=>y9963_dicdi ame: full=probable serine threonine-protein kinase ddb_g0272254;GO:0005515=>protein binding=>y9963_dicdi ame: full=probable serine threonine-protein kinase ddb_g0272254;GO:0006351=>transcription, DNA-dependent=>y9963_dicdi ame: full=probable serine threonine-protein kinase ddb_g0272254;GO:0007254=>JNK cascade=>y9963_dicdi ame: full=probable serine …	PF07714=>Protein tyrosine kinase;	IPR011009 (Protein kinase-like domain)
RirG205670	7			IPR011009 (Protein kinase-like domain)
RirG169100	7			IPR011009 (Protein kinase-like domain)
RirG178590	7	GO:0004672=>protein kinase activity=>y9851_dicdi ame: full=probable serine threonine-protein kinase ddb_g0275165;GO:0005488=>binding=>y9851_dicdi ame: full=probable serine threonine-protein kinase ddb_g0275165;GO:0005856=>cytoskeleton=>y9851_dicdi ame: full=probable serine threonine-protein kinase ddb_g0275165;GO:0006468=>protein phosphorylation=>y9851_dicdi ame: full=probable serine threonine-pr…	PF07714=>Protein tyrosine kinase;	IPR011009 (Protein kinase-like domain)
RirG240230	7	GO:0000166=>nucleotide binding=>phg2_dicdi ame: full=serine threonine-protein kinase phg2;GO:0001819=>positive regulation of cytokine production=>phg2_dicdi ame: full=serine threonine-protein kinase phg2;GO:0002224=>toll-like receptor signaling pathway=>phg2_dicdi ame: full=serine threonine-protein kinase phg2;GO:0004714=>transmembrane receptor protein tyrosine kinase activity=>phg2_dicdi ame: fu…	PF07714=>Protein tyrosine kinase;	IPR011009 (Protein kinase-like domain)
RirG147480	7	GO:0004674=>protein serine/threonine kinase activity=>y9963_dicdi ame: full=probable serine threonine-protein kinase ddb_g0272254;GO:0007254=>JNK cascade=>y9963_dicdi ame: full=probable serine threonine-protein kinase ddb_g0272254;GO:0019899=>enzyme binding=>y9963_dicdi ame: full=probable serine threonine-protein kinase ddb_g0272254;GO:0032147=>activation of protein kinase activity=>y9963_dicdi a…	PF07714=>Protein tyrosine kinase;	IPR011009 (Protein kinase-like domain)
RirG087300	7	GO:0001816=>cytokine production=>y9863_dicdi ame: full=probable serine threonine-protein kinase ddb_g0281745;GO:0002376=>immune system process=>y9863_dicdi ame: full=probable serine threonine-protein kinase ddb_g0281745;GO:0004713=>protein tyrosine kinase activity=>y9863_dicdi ame: full=probable serine threonine-protein kinase ddb_g0281745;GO:0005488=>binding=>y9863_dicdi ame: full=probable serin…	PF07714=>Protein tyrosine kinase;PF08238=>Sel1 repeat;	IPR011009 (Protein kinase-like domain; IPR011990 (Tetratricopeptide-like helical)
RirG051590	7	GO:0005622=>intracellular=>y9963_dicdi ame: full=probable serine threonine-protein kinase ddb_g0272254;GO:0016020=>membrane=>y9963_dicdi ame: full=probable serine threonine-protein kinase ddb_g0272254;GO:0016772=>transferase activity, transferring phosphorus-containing groups=>y9963_dicdi ame: full=probable serine threonine-protein kinase ddb_g0272254;GO:0044237=>cellular metabolic process=>y9963…	PF00069=>Protein kinase domain;	IPR011009 (Protein kinase-like domain)
RirG175870	7	GO:0002376=>immune system process=>y9963_dicdi ame: full=probable serine threonine-protein kinase ddb_g0272254;GO:0004672=>protein kinase activity=>y9963_dicdi ame: full=probable serine threonine-protein kinase ddb_g0272254;GO:0005488=>binding=>y9963_dicdi ame: full=probable serine threonine-protein kinase ddb_g0272254;GO:0007165=>signal transduction=>y9963_dicdi ame: full=probable serine threoni…	PF07714=>Protein tyrosine kinase;	IPR011009 (Protein kinase-like domain)
RirG190040	7	GO:0003824=>catalytic activity=>y9963_dicdi ame: full=probable serine threonine-protein kinase ddb_g0272254);	PF00069=>Protein kinase domain;	IPR011009 (Protein kinase-like domain)
RirG254490	7	GO:0001819=>positive regulation of cytokine production=>phg2_dicdi ame: full=serine threonine-protein kinase phg2;GO:0002224=>toll-like receptor signaling pathway=>phg2_dicdi ame: full=serine threonine-protein kinase phg2;GO:0003006=>developmental process involved in reproduction=>phg2_dicdi ame: full=serine threonine-protein kinase phg2;GO:0004714=>transmembrane receptor protein tyrosine kinase …	PF07714=>Protein tyrosine kinase;	IPR011009 (Protein kinase-like domain)
RirG272950	7	GO:0001819=>positive regulation of cytokine production=>kinx_dicdi ame: full=probable serine threonine-protein kinase kinx;GO:0002224=>toll-like receptor signaling pathway=>kinx_dicdi ame: full=probable serine threonine-protein kinase kinx;GO:0004713=>protein tyrosine kinase activity=>kinx_dicdi ame: full=probable serine threonine-protein kinase kinx;GO:0005515=>protein binding=>kinx_dicdi ame: f…	PF07714=>Protein tyrosine kinase;	IPR011009 (Protein kinase-like domain)
RirG204470	7	GO:0004674=>protein serine/threonine kinase activity=>y9963_dicdi ame: full=probable serine threonine-protein kinase ddb_g0272254;GO:0005622=>intracellular=>y9963_dicdi ame: full=probable serine threonine-protein kinase ddb_g0272254;GO:0007049=>cell cycle=>y9963_dicdi ame: full=probable serine threonine-protein kinase ddb_g0272254;GO:0007254=>JNK cascade=>y9963_dicdi ame: full=probable serine thr…	PF07714=>Protein tyrosine kinase;	IPR011009 (Protein kinase-like domain)
RirG085280	7	GO:0001819=>positive regulation of cytokine production=>y9963_dicdi ame: full=probable serine threonine-protein kinase ddb_g0272254;GO:0002224=>toll-like receptor signaling pathway=>y9963_dicdi ame: full=probable serine threonine-protein kinase ddb_g0272254;GO:0004672=>protein kinase activity=>y9963_dicdi ame: full=probable serine threonine-protein kinase ddb_g0272254;GO:0005515=>protein binding=…	PF07714=>Protein tyrosine kinase;	IPR011009 (Protein kinase-like domain)
RirG086430	7	GO:0004674=>protein serine/threonine kinase activity=>phg2_dicdi ame: full=serine threonine-protein kinase phg2;GO:0005488=>binding=>phg2_dicdi ame: full=serine threonine-protein kinase phg2;GO:0005622=>intracellular=>phg2_dicdi ame: full=serine threonine-protein kinase phg2;GO:0006952=>defense response=>phg2_dicdi ame: full=serine threonine-protein kinase phg2;GO:0006955=>immune response=>phg2_d…	PF07714=>Protein tyrosine kinase;	IPR011009 (Protein kinase-like domain)
RirG201580	7	GO:0016301=>kinase activity=>y9963_dicdi ame: full=probable serine threonine-protein kinase ddb_g0272254;GO:0044237=>cellular metabolic process=>y9963_dicdi ame: full=probable serine threonine-protein kinase ddb_g0272254;GO:0044699=>single-organism process=>y9963_dicdi ame: full=probable serine threonine-protein kinase ddb_g0272254;GO:0050794=>regulation of cellular process=>y9963_dicdi ame: full…	PF07714=>Protein tyrosine kinase;	IPR011009 (Protein kinase-like domain)
RirG239200	7	GO:0005488=>binding=>y9963_dicdi ame: full=probable serine threonine-protein kinase ddb_g0272254;GO:0005622=>intracellular=>y9963_dicdi ame: full=probable serine threonine-protein kinase ddb_g0272254;GO:0008152=>metabolic process=>y9963_dicdi ame: full=probable serine threonine-protein kinase ddb_g0272254;GO:0016772=>transferase activity, transferring phosphorus-containing groups=>y9963_dicdi ame…	PF07714=>Protein tyrosine kinase;	IPR011009 (Protein kinase-like domain)
RirG111380	7	GO:0001819=>positive regulation of cytokine production=>y9963_dicdi ame: full=probable serine threonine-protein kinase ddb_g0272254;GO:0002224=>toll-like receptor signaling pathway=>y9963_dicdi ame: full=probable serine threonine-protein kinase ddb_g0272254;GO:0004672=>protein kinase activity=>y9963_dicdi ame: full=probable serine threonine-protein kinase ddb_g0272254;GO:0005515=>protein binding=…	PF07714=>Protein tyrosine kinase;	IPR011009 (Protein kinase-like domain)
RirG104150	7	GO:0002224=>toll-like receptor signaling pathway=>y9963_dicdi ame: full=probable serine threonine-protein kinase ddb_g0272254;GO:0004672=>protein kinase activity=>y9963_dicdi ame: full=probable serine threonine-protein kinase ddb_g0272254;GO:0005488=>binding=>y9963_dicdi ame: full=probable serine threonine-protein kinase ddb_g0272254;GO:0006139=>nucleobase-containing compound metabolic process=>y…	PF07714=>Protein tyrosine kinase;	IPR011009 (Protein kinase-like domain)
RirG146160	7	GO:0000165=>MAPK cascade=>y9865_dicdi ame: full=probable serine threonine-protein kinase ddb_g0280461;GO:0004672=>protein kinase activity=>y9865_dicdi ame: full=probable serine threonine-protein kinase ddb_g0280461;GO:0004871=>signal transducer activity=>y9865_dicdi ame: full=probable serine threonine-protein kinase ddb_g0280461;GO:0005515=>protein binding=>y9865_dicdi ame: full=probable serine t…	PF07714=>Protein tyrosine kinase;	IPR009030 (Growth factor, receptor; IPR011009 (Protein kinase-like domain)
RirG272960	7	GO:0002224=>toll-like receptor signaling pathway=>yr831_mimiv ame: full= serine threonine-protein kinase receptor r831 flags: precursor;GO:0004672=>protein kinase activity=>yr831_mimiv ame: full= serine threonine-protein kinase receptor r831 flags: precursor;GO:0005488=>binding=>yr831_mimiv ame: full= serine threonine-protein kinase receptor r831 flags: precursor;GO:0005976=>polysaccharide metabo…	PF07714=>Protein tyrosine kinase;	IPR011009 (Protein kinase-like domain)
RirG065730	7	GO:0004672=>protein kinase activity=>yr831_mimiv ame: full= serine threonine-protein kinase receptor r831 flags: precursor;GO:0005488=>binding=>yr831_mimiv ame: full= serine threonine-protein kinase receptor r831 flags: precursor;GO:0005622=>intracellular=>yr831_mimiv ame: full= serine threonine-protein kinase receptor r831 flags: precursor;GO:0006468=>protein phosphorylation=>yr831_mimiv ame: fu…	PF07714=>Protein tyrosine kinase;	IPR011009 (Protein kinase-like domain)
RirG222620	7	GO:0005515=>protein binding=>pats1_dicdi ame: full=probable serine threonine-protein kinase pats1 ame: full=protein associated with the transduction of signal 1;GO:0010646=>regulation of cell communication=>pats1_dicdi ame: full=probable serine threonine-protein kinase pats1 ame: full=protein associated with the transduction of signal 1;GO:0010942=>positive regulation of cell death=>pats1_dicdi a…	PF07714=>Protein tyrosine kinase;	IPR011009 (Protein kinase-like domain)
RirG214630	7	GO:0002224=>toll-like receptor signaling pathway=>pats1_dicdi ame: full=probable serine threonine-protein kinase pats1 ame: full=protein associated with the transduction of signal 1;GO:0004672=>protein kinase activity=>pats1_dicdi ame: full=probable serine threonine-protein kinase pats1 ame: full=protein associated with the transduction of signal 1;GO:0005488=>binding=>pats1_dicdi ame: full=proba…	PF07714=>Protein tyrosine kinase;	IPR011009 (Protein kinase-like domain)
RirG108220	7	GO:0003824=>catalytic activity=>kinx_dicdi ame: full=probable serine threonine-protein kinase kinx);	PF00069=>Protein kinase domain;	IPR011009 (Protein kinase-like domain)
RirG088280	7	GO:0001819=>positive regulation of cytokine production=>phg2_dicdi ame: full=serine threonine-protein kinase phg2;GO:0002224=>toll-like receptor signaling pathway=>phg2_dicdi ame: full=serine threonine-protein kinase phg2;GO:0002366=>leukocyte activation involved in immune response=>phg2_dicdi ame: full=serine threonine-protein kinase phg2;GO:0002694=>regulation of leukocyte activation=>phg2_dicd…	PF00069=>Protein kinase domain;	IPR011009 (Protein kinase-like domain)
RirG142290	7	GO:0005488=>binding=>y9963_dicdi ame: full=probable serine threonine-protein kinase ddb_g0272254;GO:0016772=>transferase activity, transferring phosphorus-containing groups=>y9963_dicdi ame: full=probable serine threonine-protein kinase ddb_g0272254;GO:0044237=>cellular metabolic process=>y9963_dicdi ame: full=probable serine threonine-protein kinase ddb_g0272254;GO:0050794=>regulation of cellula…	PF07714=>Protein tyrosine kinase;PF08740=>BCS1 N terminal;	IPR011009 (Protein kinase-like domain; IPR014851 (BCS1, N-terminal)
RirG102660	7	GO:0002224=>toll-like receptor signaling pathway=>y9963_dicdi ame: full=probable serine threonine-protein kinase ddb_g0272254;GO:0004674=>protein serine/threonine kinase activity=>y9963_dicdi ame: full=probable serine threonine-protein kinase ddb_g0272254;GO:0005737=>cytoplasm=>y9963_dicdi ame: full=probable serine threonine-protein kinase ddb_g0272254;GO:0007254=>JNK cascade=>y9963_dicdi ame: fu…	PF07714=>Protein tyrosine kinase;	IPR011009 (Protein kinase-like domain)
RirG061690	7	GO:0001819=>positive regulation of cytokine production=>y9963_dicdi ame: full=probable serine threonine-protein kinase ddb_g0272254;GO:0002009=>morphogenesis of an epithelium=>y9963_dicdi ame: full=probable serine threonine-protein kinase ddb_g0272254;GO:0002224=>toll-like receptor signaling pathway=>y9963_dicdi ame: full=probable serine threonine-protein kinase ddb_g0272254;GO:0004674=>protein s…	PF00069=>Protein kinase domain;	IPR011009 (Protein kinase-like domain)
RirG171600	7	GO:0002224=>toll-like receptor signaling pathway=>y9963_dicdi ame: full=probable serine threonine-protein kinase ddb_g0272254;GO:0004713=>protein tyrosine kinase activity=>y9963_dicdi ame: full=probable serine threonine-protein kinase ddb_g0272254;GO:0004871=>signal transducer activity=>y9963_dicdi ame: full=probable serine threonine-protein kinase ddb_g0272254;GO:0005515=>protein binding=>y9963_…	PF07714=>Protein tyrosine kinase;	IPR011009 (Protein kinase-like domain)
RirG144470	7	GO:0002224=>toll-like receptor signaling pathway=>y9963_dicdi ame: full=probable serine threonine-protein kinase ddb_g0272254;GO:0004672=>protein kinase activity=>y9963_dicdi ame: full=probable serine threonine-protein kinase ddb_g0272254;GO:0005488=>binding=>y9963_dicdi ame: full=probable serine threonine-protein kinase ddb_g0272254;GO:0006139=>nucleobase-containing compound metabolic process=>y…	PF07714=>Protein tyrosine kinase;	IPR011009 (Protein kinase-like domain)
RirG077820	7	GO:0001819=>positive regulation of cytokine production=>y9963_dicdi ame: full=probable serine threonine-protein kinase ddb_g0272254;GO:0002224=>toll-like receptor signaling pathway=>y9963_dicdi ame: full=probable serine threonine-protein kinase ddb_g0272254;GO:0004674=>protein serine/threonine kinase activity=>y9963_dicdi ame: full=probable serine threonine-protein kinase ddb_g0272254;GO:0006355=…	PF07714=>Protein tyrosine kinase;	IPR011009 (Protein kinase-like domain)
RirG137180	7	GO:0001819=>positive regulation of cytokine production=>y9963_dicdi ame: full=probable serine threonine-protein kinase ddb_g0272254;GO:0002224=>toll-like receptor signaling pathway=>y9963_dicdi ame: full=probable serine threonine-protein kinase ddb_g0272254;GO:0004672=>protein kinase activity=>y9963_dicdi ame: full=probable serine threonine-protein kinase ddb_g0272254;GO:0005515=>protein binding=…	PF00069=>Protein kinase domain;	IPR011009 (Protein kinase-like domain)
RirG089620	7	GO:0002224=>toll-like receptor signaling pathway=>gbpc_dicdi ame: full=cyclic gmp-binding protein c ame: full=ras guanine nucleotide exchange factor t ame: full= domain-containing protein t;GO:0005488=>binding=>gbpc_dicdi ame: full=cyclic gmp-binding protein c ame: full=ras guanine nucleotide exchange factor t ame: full= domain-containing protein t;GO:0016772=>transferase activity, transferring p…	PF07714=>Protein tyrosine kinase;	IPR011009 (Protein kinase-like domain)
RirG166210	7	GO:0009987=>cellular process=>y9963_dicdi ame: full=probable serine threonine-protein kinase ddb_g0272254;GO:0016020=>membrane=>y9963_dicdi ame: full=probable serine threonine-protein kinase ddb_g0272254;GO:0016301=>kinase activity=>y9963_dicdi ame: full=probable serine threonine-protein kinase ddb_g0272254;GO:0044464=>cell part=>y9963_dicdi ame: full=probable serine threonine-protein kinase ddb_…	PF07714=>Protein tyrosine kinase;	IPR011009 (Protein kinase-like domain)
RirG158990	7	GO:0001819=>positive regulation of cytokine production=>y9963_dicdi ame: full=probable serine threonine-protein kinase ddb_g0272254;GO:0002224=>toll-like receptor signaling pathway=>y9963_dicdi ame: full=probable serine threonine-protein kinase ddb_g0272254;GO:0004674=>protein serine/threonine kinase activity=>y9963_dicdi ame: full=probable serine threonine-protein kinase ddb_g0272254;GO:0006355=…	PF07714=>Protein tyrosine kinase;	IPR011009 (Protein kinase-like domain)
RirG214160	7	GO:0004672=>protein kinase activity=>pats1_dicdi ame: full=probable serine threonine-protein kinase pats1 ame: full=protein associated with the transduction of signal 1;GO:0005488=>binding=>pats1_dicdi ame: full=probable serine threonine-protein kinase pats1 ame: full=protein associated with the transduction of signal 1;GO:0045860=>positive regulation of protein kinase activity=>pats1_dicdi ame: …	PF07714=>Protein tyrosine kinase;	IPR011009 (Protein kinase-like domain)
RirG097500	7	GO:0000165=>MAPK cascade=>y1199_dicdi ame: full=probable serine threonine-protein kinase ddb_g0282895;GO:0002009=>morphogenesis of an epithelium=>y1199_dicdi ame: full=probable serine threonine-protein kinase ddb_g0282895;GO:0004674=>protein serine/threonine kinase activity=>y1199_dicdi ame: full=probable serine threonine-protein kinase ddb_g0282895;GO:0006915=>apoptotic process=>y1199_dicdi ame:…	PF00069=>Protein kinase domain;	IPR011009 (Protein kinase-like domain)
RirG267470	7	GO:0002224=>toll-like receptor signaling pathway=>gdt4_dicdi ame: full=probable serine threonine-protein kinase gdt4 ame: full=growth-differentiation transition protein 4 flags: precursor;GO:0004672=>protein kinase activity=>gdt4_dicdi ame: full=probable serine threonine-protein kinase gdt4 ame: full=growth-differentiation transition protein 4 flags: precursor;GO:0005488=>binding=>gdt4_dicdi ame:…	PF07714=>Protein tyrosine kinase;	IPR011009 (Protein kinase-like domain)
RirG054140	7	GO:0002009=>morphogenesis of an epithelium=>y9963_dicdi ame: full=probable serine threonine-protein kinase ddb_g0272254;GO:0002224=>toll-like receptor signaling pathway=>y9963_dicdi ame: full=probable serine threonine-protein kinase ddb_g0272254;GO:0002252=>immune effector process=>y9963_dicdi ame: full=probable serine threonine-protein kinase ddb_g0272254;GO:0004674=>protein serine/threonine kin…	PF00069=>Protein kinase domain;	IPR011009 (Protein kinase-like domain)
RirG181680	7	GO:0000165=>MAPK cascade=>y9963_dicdi ame: full=probable serine threonine-protein kinase ddb_g0272254;GO:0004674=>protein serine/threonine kinase activity=>y9963_dicdi ame: full=probable serine threonine-protein kinase ddb_g0272254;GO:0006468=>protein phosphorylation=>y9963_dicdi ame: full=probable serine threonine-protein kinase ddb_g0272254;GO:0019899=>enzyme binding=>y9963_dicdi ame: full=prob…	PF07714=>Protein tyrosine kinase;	IPR011009 (Protein kinase-like domain)
RirG159060	7	GO:0001819=>positive regulation of cytokine production=>phg2_dicdi ame: full=serine threonine-protein kinase phg2;GO:0002224=>toll-like receptor signaling pathway=>phg2_dicdi ame: full=serine threonine-protein kinase phg2;GO:0004674=>protein serine/threonine kinase activity=>phg2_dicdi ame: full=serine threonine-protein kinase phg2;GO:0005515=>protein binding=>phg2_dicdi ame: full=serine threonin…	PF07714=>Protein tyrosine kinase;	IPR011009 (Protein kinase-like domain)
RirG119060	7	GO:0001819=>positive regulation of cytokine production=>phg2_dicdi ame: full=serine threonine-protein kinase phg2;GO:0002224=>toll-like receptor signaling pathway=>phg2_dicdi ame: full=serine threonine-protein kinase phg2;GO:0004672=>protein kinase activity=>phg2_dicdi ame: full=serine threonine-protein kinase phg2;GO:0005515=>protein binding=>phg2_dicdi ame: full=serine threonine-protein kinase …	PF07714=>Protein tyrosine kinase;	IPR011009 (Protein kinase-like domain)
RirG078970	7	GO:0002224=>toll-like receptor signaling pathway=>y9963_dicdi ame: full=probable serine threonine-protein kinase ddb_g0272254;GO:0004672=>protein kinase activity=>y9963_dicdi ame: full=probable serine threonine-protein kinase ddb_g0272254;GO:0005488=>binding=>y9963_dicdi ame: full=probable serine threonine-protein kinase ddb_g0272254;GO:0006139=>nucleobase-containing compound metabolic process=>y…	PF07714=>Protein tyrosine kinase;	IPR011009 (Protein kinase-like domain)
RirG169090	7	GO:0001819=>positive regulation of cytokine production=>y9963_dicdi ame: full=probable serine threonine-protein kinase ddb_g0272254;GO:0002224=>toll-like receptor signaling pathway=>y9963_dicdi ame: full=probable serine threonine-protein kinase ddb_g0272254;GO:0004672=>protein kinase activity=>y9963_dicdi ame: full=probable serine threonine-protein kinase ddb_g0272254;GO:0005515=>protein binding=…	PF07714=>Protein tyrosine kinase;	IPR011009 (Protein kinase-like domain)
RirG071450	7	GO:0002224=>toll-like receptor signaling pathway=>y9957_dicdi ame: full=probable serine threonine-protein kinase ddb_g0276181;GO:0004672=>protein kinase activity=>y9957_dicdi ame: full=probable serine threonine-protein kinase ddb_g0276181;GO:0005488=>binding=>y9957_dicdi ame: full=probable serine threonine-protein kinase ddb_g0276181;GO:0005737=>cytoplasm=>y9957_dicdi ame: full=probable serine th…	PF00069=>Protein kinase domain;	IPR011009 (Protein kinase-like domain)
RirG140030	7	GO:0003824=>catalytic activity=>y9963_dicdi ame: full=probable serine threonine-protein kinase ddb_g0272254);	PF07714=>Protein tyrosine kinase;	IPR011009 (Protein kinase-like domain)
RirG111390	7	GO:0001819=>positive regulation of cytokine production=>phg2_dicdi ame: full=serine threonine-protein kinase phg2;GO:0002224=>toll-like receptor signaling pathway=>phg2_dicdi ame: full=serine threonine-protein kinase phg2;GO:0005515=>protein binding=>phg2_dicdi ame: full=serine threonine-protein kinase phg2;GO:0006139=>nucleobase-containing compound metabolic process=>phg2_dicdi ame: full=serine …	PF07714=>Protein tyrosine kinase;	IPR011009 (Protein kinase-like domain)
RirG205660	7	GO:0004713=>protein tyrosine kinase activity=>y9963_dicdi ame: full=probable serine threonine-protein kinase ddb_g0272254;GO:0004871=>signal transducer activity=>y9963_dicdi ame: full=probable serine threonine-protein kinase ddb_g0272254;GO:0005515=>protein binding=>y9963_dicdi ame: full=probable serine threonine-protein kinase ddb_g0272254;GO:0006139=>nucleobase-containing compound metabolic pro…	PF07714=>Protein tyrosine kinase;	IPR011009 (Protein kinase-like domain)
RirG097390	7	GO:0002224=>toll-like receptor signaling pathway=>y9963_dicdi ame: full=probable serine threonine-protein kinase ddb_g0272254;GO:0004672=>protein kinase activity=>y9963_dicdi ame: full=probable serine threonine-protein kinase ddb_g0272254;GO:0005488=>binding=>y9963_dicdi ame: full=probable serine threonine-protein kinase ddb_g0272254;GO:0006139=>nucleobase-containing compound metabolic process=>y…	PF07714=>Protein tyrosine kinase;	IPR011009 (Protein kinase-like domain)
RirG240000	7	GO:0002224=>toll-like receptor signaling pathway=>y9963_dicdi ame: full=probable serine threonine-protein kinase ddb_g0272254;GO:0004672=>protein kinase activity=>y9963_dicdi ame: full=probable serine threonine-protein kinase ddb_g0272254;GO:0005488=>binding=>y9963_dicdi ame: full=probable serine threonine-protein kinase ddb_g0272254;GO:0006139=>nucleobase-containing compound metabolic process=>y…	PF07714=>Protein tyrosine kinase;	IPR011009 (Protein kinase-like domain)
RirG264060	7	GO:0001819=>positive regulation of cytokine production=>limk_dicdi ame: full=probable lim domain-containing serine threonine-protein kinase ddb_g0287001;GO:0002224=>toll-like receptor signaling pathway=>limk_dicdi ame: full=probable lim domain-containing serine threonine-protein kinase ddb_g0287001;GO:0004674=>protein serine/threonine kinase activity=>limk_dicdi ame: full=probable lim domain-cont…	PF00069=>Protein kinase domain;PF07714=>Protein tyrosine kinase;	IPR011009 (Protein kinase-like domain)
RirG201880	7	GO:0001819=>positive regulation of cytokine production=>phg2_dicdi ame: full=serine threonine-protein kinase phg2;GO:0002224=>toll-like receptor signaling pathway=>phg2_dicdi ame: full=serine threonine-protein kinase phg2;GO:0004674=>protein serine/threonine kinase activity=>phg2_dicdi ame: full=serine threonine-protein kinase phg2;GO:0006355=>regulation of transcription, DNA-dependent=>phg2_dicd…	PF00069=>Protein kinase domain;	IPR011009 (Protein kinase-like domain)
RirG145370	7	GO:0002224=>toll-like receptor signaling pathway=>y9963_dicdi ame: full=probable serine threonine-protein kinase ddb_g0272254;GO:0004672=>protein kinase activity=>y9963_dicdi ame: full=probable serine threonine-protein kinase ddb_g0272254;GO:0005488=>binding=>y9963_dicdi ame: full=probable serine threonine-protein kinase ddb_g0272254;GO:0006139=>nucleobase-containing compound metabolic process=>y…	PF07714=>Protein tyrosine kinase;	IPR011009 (Protein kinase-like domain)
RirG239080	7	GO:0001819=>positive regulation of cytokine production=>phg2_dicdi ame: full=serine threonine-protein kinase phg2;GO:0002224=>toll-like receptor signaling pathway=>phg2_dicdi ame: full=serine threonine-protein kinase phg2;GO:0002366=>leukocyte activation involved in immune response=>phg2_dicdi ame: full=serine threonine-protein kinase phg2;GO:0002694=>regulation of leukocyte activation=>phg2_dicd…	PF00069=>Protein kinase domain;	IPR011009 (Protein kinase-like domain)
RirG190710	7	GO:0002224=>toll-like receptor signaling pathway=>y9963_dicdi ame: full=probable serine threonine-protein kinase ddb_g0272254;GO:0004672=>protein kinase activity=>y9963_dicdi ame: full=probable serine threonine-protein kinase ddb_g0272254;GO:0005488=>binding=>y9963_dicdi ame: full=probable serine threonine-protein kinase ddb_g0272254;GO:0006139=>nucleobase-containing compound metabolic process=>y…	PF07714=>Protein tyrosine kinase;	IPR011009 (Protein kinase-like domain)
RirG065890	7	GO:0000166=>nucleotide binding=>y9963_dicdi ame: full=probable serine threonine-protein kinase ddb_g0272254;GO:0001819=>positive regulation of cytokine production=>y9963_dicdi ame: full=probable serine threonine-protein kinase ddb_g0272254;GO:0002224=>toll-like receptor signaling pathway=>y9963_dicdi ame: full=probable serine threonine-protein kinase ddb_g0272254;GO:0004672=>protein kinase activi…	PF07714=>Protein tyrosine kinase;	IPR011009 (Protein kinase-like domain)
RirG118910	7	GO:0002224=>toll-like receptor signaling pathway=>phg2_dicdi ame: full=serine threonine-protein kinase phg2;GO:0004672=>protein kinase activity=>phg2_dicdi ame: full=serine threonine-protein kinase phg2;GO:0005488=>binding=>phg2_dicdi ame: full=serine threonine-protein kinase phg2;GO:0005737=>cytoplasm=>phg2_dicdi ame: full=serine threonine-protein kinase phg2;GO:0009966=>regulation of signal tra…	PF00069=>Protein kinase domain;	IPR011009 (Protein kinase-like domain)
RirG267460	7	GO:0001819=>positive regulation of cytokine production=>y9963_dicdi ame: full=probable serine threonine-protein kinase ddb_g0272254;GO:0002224=>toll-like receptor signaling pathway=>y9963_dicdi ame: full=probable serine threonine-protein kinase ddb_g0272254;GO:0004672=>protein kinase activity=>y9963_dicdi ame: full=probable serine threonine-protein kinase ddb_g0272254;GO:0005515=>protein binding=…	PF07714=>Protein tyrosine kinase;	IPR011009 (Protein kinase-like domain)
RirG172180	7	GO:0001819=>positive regulation of cytokine production=>y9963_dicdi ame: full=probable serine threonine-protein kinase ddb_g0272254;GO:0002224=>toll-like receptor signaling pathway=>y9963_dicdi ame: full=probable serine threonine-protein kinase ddb_g0272254;GO:0004672=>protein kinase activity=>y9963_dicdi ame: full=probable serine threonine-protein kinase ddb_g0272254;GO:0005515=>protein binding=…	PF00069=>Protein kinase domain;	IPR011009 (Protein kinase-like domain)
RirG053220	7	GO:0005515=>protein binding=>y9963_dicdi ame: full=probable serine threonine-protein kinase ddb_g0272254;GO:0007166=>cell surface receptor signaling pathway=>y9963_dicdi ame: full=probable serine threonine-protein kinase ddb_g0272254;GO:0009966=>regulation of signal transduction=>y9963_dicdi ame: full=probable serine threonine-protein kinase ddb_g0272254;GO:0010646=>regulation of cell communicati…	PF07714=>Protein tyrosine kinase;	IPR011009 (Protein kinase-like domain)
RirG209190	7	GO:0001819=>positive regulation of cytokine production=>y9963_dicdi ame: full=probable serine threonine-protein kinase ddb_g0272254;GO:0002224=>toll-like receptor signaling pathway=>y9963_dicdi ame: full=probable serine threonine-protein kinase ddb_g0272254;GO:0005515=>protein binding=>y9963_dicdi ame: full=probable serine threonine-protein kinase ddb_g0272254;GO:0006139=>nucleobase-containing co…	PF07714=>Protein tyrosine kinase;	IPR011009 (Protein kinase-like domain)
RirG241600	7	GO:0002684=>positive regulation of immune system process=>yr831_mimiv ame: full= serine threonine-protein kinase receptor r831 flags: precursor;GO:0004674=>protein serine/threonine kinase activity=>yr831_mimiv ame: full= serine threonine-protein kinase receptor r831 flags: precursor;GO:0005856=>cytoskeleton=>yr831_mimiv ame: full= serine threonine-protein kinase receptor r831 flags: precursor;GO:…	PF07714=>Protein tyrosine kinase;	IPR011009 (Protein kinase-like domain)
RirG163550	7	GO:0000165=>MAPK cascade=>phg2_dicdi ame: full=serine threonine-protein kinase phg2;GO:0004674=>protein serine/threonine kinase activity=>phg2_dicdi ame: full=serine threonine-protein kinase phg2;GO:0006468=>protein phosphorylation=>phg2_dicdi ame: full=serine threonine-protein kinase phg2;GO:0016020=>membrane=>phg2_dicdi ame: full=serine threonine-protein kinase phg2;GO:0019899=>enzyme binding=>…	PF07714=>Protein tyrosine kinase;	IPR011009 (Protein kinase-like domain)
RirG264140	7	GO:0016740=>transferase activity=>yr831_mimiv ame: full= serine threonine-protein kinase receptor r831 flags: precursor);	PF00069=>Protein kinase domain;	IPR011009 (Protein kinase-like domain)
RirG097750	7	GO:0001819=>positive regulation of cytokine production=>y9963_dicdi ame: full=probable serine threonine-protein kinase ddb_g0272254;GO:0002224=>toll-like receptor signaling pathway=>y9963_dicdi ame: full=probable serine threonine-protein kinase ddb_g0272254;GO:0004674=>protein serine/threonine kinase activity=>y9963_dicdi ame: full=probable serine threonine-protein kinase ddb_g0272254;GO:0006139=…	PF00069=>Protein kinase domain;	IPR011009 (Protein kinase-like domain)
RirG136230	7	GO:0004713=>protein tyrosine kinase activity=>y9963_dicdi ame: full=probable serine threonine-protein kinase ddb_g0272254;GO:0004871=>signal transducer activity=>y9963_dicdi ame: full=probable serine threonine-protein kinase ddb_g0272254;GO:0005515=>protein binding=>y9963_dicdi ame: full=probable serine threonine-protein kinase ddb_g0272254;GO:0006139=>nucleobase-containing compound metabolic pro…	PF07714=>Protein tyrosine kinase;	IPR011009 (Protein kinase-like domain)
RirG109470	7	GO:0002224=>toll-like receptor signaling pathway=>gdt4_dicdi ame: full=probable serine threonine-protein kinase gdt4 ame: full=growth-differentiation transition protein 4 flags: precursor;GO:0004672=>protein kinase activity=>gdt4_dicdi ame: full=probable serine threonine-protein kinase gdt4 ame: full=growth-differentiation transition protein 4 flags: precursor;GO:0005488=>binding=>gdt4_dicdi ame:…	PF00069=>Protein kinase domain;	IPR011009 (Protein kinase-like domain)
RirG225710	7	GO:0004672=>protein kinase activity=>y9963_dicdi ame: full=probable serine threonine-protein kinase ddb_g0272254;GO:0005488=>binding=>y9963_dicdi ame: full=probable serine threonine-protein kinase ddb_g0272254;GO:0005622=>intracellular=>y9963_dicdi ame: full=probable serine threonine-protein kinase ddb_g0272254;GO:0006468=>protein phosphorylation=>y9963_dicdi ame: full=probable serine threonine-p…	PF07714=>Protein tyrosine kinase;	IPR011009 (Protein kinase-like domain)
RirG145350	7	GO:0002224=>toll-like receptor signaling pathway=>y9963_dicdi ame: full=probable serine threonine-protein kinase ddb_g0272254;GO:0004672=>protein kinase activity=>y9963_dicdi ame: full=probable serine threonine-protein kinase ddb_g0272254;GO:0005488=>binding=>y9963_dicdi ame: full=probable serine threonine-protein kinase ddb_g0272254;GO:0006139=>nucleobase-containing compound metabolic process=>y…	PF07714=>Protein tyrosine kinase;	IPR011009 (Protein kinase-like domain)
RirG149870	7	GO:0004674=>protein serine/threonine kinase activity=>y9963_dicdi ame: full=probable serine threonine-protein kinase ddb_g0272254;GO:0005622=>intracellular=>y9963_dicdi ame: full=probable serine threonine-protein kinase ddb_g0272254;GO:0007049=>cell cycle=>y9963_dicdi ame: full=probable serine threonine-protein kinase ddb_g0272254;GO:0007254=>JNK cascade=>y9963_dicdi ame: full=probable serine thr…	PF07714=>Protein tyrosine kinase;	IPR011009 (Protein kinase-like domain)
RirG167300	7	GO:0001819=>positive regulation of cytokine production=>y9851_dicdi ame: full=probable serine threonine-protein kinase ddb_g0275165;GO:0002224=>toll-like receptor signaling pathway=>y9851_dicdi ame: full=probable serine threonine-protein kinase ddb_g0275165;GO:0004672=>protein kinase activity=>y9851_dicdi ame: full=probable serine threonine-protein kinase ddb_g0275165;GO:0005515=>protein binding=…	PF07714=>Protein tyrosine kinase;	IPR011009 (Protein kinase-like domain)
RirG160070	7	GO:0000166=>nucleotide binding=>y9963_dicdi ame: full=probable serine threonine-protein kinase ddb_g0272254;GO:0004713=>protein tyrosine kinase activity=>y9963_dicdi ame: full=probable serine threonine-protein kinase ddb_g0272254;GO:0004871=>signal transducer activity=>y9963_dicdi ame: full=probable serine threonine-protein kinase ddb_g0272254;GO:0005975=>carbohydrate metabolic process=>y9963_dic…	PF07714=>Protein tyrosine kinase;	IPR011009 (Protein kinase-like domain)
RirG239250	7	GO:0002224=>toll-like receptor signaling pathway=>ytyk2_dicdi ame: full=probable tyrosine-protein kinase ddb_g0283397;GO:0004672=>protein kinase activity=>ytyk2_dicdi ame: full=probable tyrosine-protein kinase ddb_g0283397;GO:0005488=>binding=>ytyk2_dicdi ame: full=probable tyrosine-protein kinase ddb_g0283397;GO:0005737=>cytoplasm=>ytyk2_dicdi ame: full=probable tyrosine-protein kinase ddb_g0283…	PF07714=>Protein tyrosine kinase;	IPR011009 (Protein kinase-like domain)
RirG162980	7	GO:0001819=>positive regulation of cytokine production=>y9963_dicdi ame: full=probable serine threonine-protein kinase ddb_g0272254;GO:0002009=>morphogenesis of an epithelium=>y9963_dicdi ame: full=probable serine threonine-protein kinase ddb_g0272254;GO:0002224=>toll-like receptor signaling pathway=>y9963_dicdi ame: full=probable serine threonine-protein kinase ddb_g0272254;GO:0002252=>immune ef…	PF00069=>Protein kinase domain;	IPR011009 (Protein kinase-like domain)
RirG237120	7	GO:0012501=>programmed cell death=>phg2_dicdi ame: full=serine threonine-protein kinase phg2;GO:0016020=>membrane=>phg2_dicdi ame: full=serine threonine-protein kinase phg2;GO:0016301=>kinase activity=>phg2_dicdi ame: full=serine threonine-protein kinase phg2;GO:0016310=>phosphorylation=>phg2_dicdi ame: full=serine threonine-protein kinase phg2;GO:0035556=>intracellular signal transduction=>phg2_…	PF00069=>Protein kinase domain;	IPR011009 (Protein kinase-like domain)
RirG145830	7	GO:0001819=>positive regulation of cytokine production=>yr826_mimiv ame: full= serine threonine-protein kinase receptor r826 flags: precursor;GO:0002224=>toll-like receptor signaling pathway=>yr826_mimiv ame: full= serine threonine-protein kinase receptor r826 flags: precursor;GO:0004672=>protein kinase activity=>yr826_mimiv ame: full= serine threonine-protein kinase receptor r826 flags: precurso…	PF00069=>Protein kinase domain;	IPR011009 (Protein kinase-like domain)
RirG160010	7	GO:0001819=>positive regulation of cytokine production=>y9963_dicdi ame: full=probable serine threonine-protein kinase ddb_g0272254;GO:0002224=>toll-like receptor signaling pathway=>y9963_dicdi ame: full=probable serine threonine-protein kinase ddb_g0272254;GO:0004672=>protein kinase activity=>y9963_dicdi ame: full=probable serine threonine-protein kinase ddb_g0272254;GO:0005515=>protein binding=…	PF07714=>Protein tyrosine kinase;	IPR011009 (Protein kinase-like domain)
RirG222170	7	GO:0002224=>toll-like receptor signaling pathway=>yr831_mimiv ame: full= serine threonine-protein kinase receptor r831 flags: precursor;GO:0004672=>protein kinase activity=>yr831_mimiv ame: full= serine threonine-protein kinase receptor r831 flags: precursor;GO:0005488=>binding=>yr831_mimiv ame: full= serine threonine-protein kinase receptor r831 flags: precursor;GO:0006139=>nucleobase-containing…	PF07714=>Protein tyrosine kinase;	IPR011009 (Protein kinase-like domain)
RirG162060	7	GO:0002224=>toll-like receptor signaling pathway=>yr831_mimiv ame: full= serine threonine-protein kinase receptor r831 flags: precursor;GO:0004672=>protein kinase activity=>yr831_mimiv ame: full= serine threonine-protein kinase receptor r831 flags: precursor;GO:0005488=>binding=>yr831_mimiv ame: full= serine threonine-protein kinase receptor r831 flags: precursor;GO:0006139=>nucleobase-containing…	PF07714=>Protein tyrosine kinase;	IPR011009 (Protein kinase-like domain)
RirG263800	7	GO:0002224=>toll-like receptor signaling pathway=>y9963_dicdi ame: full=probable serine threonine-protein kinase ddb_g0272254;GO:0004674=>protein serine/threonine kinase activity=>y9963_dicdi ame: full=probable serine threonine-protein kinase ddb_g0272254;GO:0005737=>cytoplasm=>y9963_dicdi ame: full=probable serine threonine-protein kinase ddb_g0272254;GO:0012501=>programmed cell death=>y9963_dic…	PF07714=>Protein tyrosine kinase;	IPR011009 (Protein kinase-like domain)
RirG214150	7	GO:0004672=>protein kinase activity=>pyk3_dicdi ame: full=dual specificity protein kinase pyk3 ame: full=tyrosine-protein kinase 3;GO:0005488=>binding=>pyk3_dicdi ame: full=dual specificity protein kinase pyk3 ame: full=tyrosine-protein kinase 3;GO:0009966=>regulation of signal transduction=>pyk3_dicdi ame: full=dual specificity protein kinase pyk3 ame: full=tyrosine-protein kinase 3;GO:0044464=>…	PF07714=>Protein tyrosine kinase;	IPR011009 (Protein kinase-like domain)
RirG142300	7	GO:0002224=>toll-like receptor signaling pathway=>yr831_mimiv ame: full= serine threonine-protein kinase receptor r831 flags: precursor;GO:0004672=>protein kinase activity=>yr831_mimiv ame: full= serine threonine-protein kinase receptor r831 flags: precursor;GO:0005488=>binding=>yr831_mimiv ame: full= serine threonine-protein kinase receptor r831 flags: precursor;GO:0006139=>nucleobase-containing…	PF07714=>Protein tyrosine kinase;	IPR011009 (Protein kinase-like domain)
RirG163300	7	GO:0001819=>positive regulation of cytokine production=>pats1_dicdi ame: full=probable serine threonine-protein kinase pats1 ame: full=protein associated with the transduction of signal 1;GO:0002224=>toll-like receptor signaling pathway=>pats1_dicdi ame: full=probable serine threonine-protein kinase pats1 ame: full=protein associated with the transduction of signal 1;GO:0004672=>protein kinase ac…	PF07714=>Protein tyrosine kinase;	IPR011009 (Protein kinase-like domain)
RirG262340	7	GO:0004674=>protein serine/threonine kinase activity=>phg2_dicdi ame: full=serine threonine-protein kinase phg2;GO:0007254=>JNK cascade=>phg2_dicdi ame: full=serine threonine-protein kinase phg2;GO:0009058=>biosynthetic process=>phg2_dicdi ame: full=serine threonine-protein kinase phg2;GO:0016043=>cellular component organization=>phg2_dicdi ame: full=serine threonine-protein kinase phg2;GO:001604…	PF07714=>Protein tyrosine kinase;	IPR011009 (Protein kinase-like domain)
RirG216360	7	GO:0002009=>morphogenesis of an epithelium=>y9963_dicdi ame: full=probable serine threonine-protein kinase ddb_g0272254;GO:0002224=>toll-like receptor signaling pathway=>y9963_dicdi ame: full=probable serine threonine-protein kinase ddb_g0272254;GO:0002252=>immune effector process=>y9963_dicdi ame: full=probable serine threonine-protein kinase ddb_g0272254;GO:0004674=>protein serine/threonine kin…	PF00069=>Protein kinase domain;	IPR011009 (Protein kinase-like domain)
RirG192160	7	GO:0002009=>morphogenesis of an epithelium=>yr831_mimiv ame: full= serine threonine-protein kinase receptor r831 flags: precursor;GO:0002224=>toll-like receptor signaling pathway=>yr831_mimiv ame: full= serine threonine-protein kinase receptor r831 flags: precursor;GO:0002252=>immune effector process=>yr831_mimiv ame: full= serine threonine-protein kinase receptor r831 flags: precursor;GO:0004674…	PF07714=>Protein tyrosine kinase;	IPR011009 (Protein kinase-like domain)
RirG171540	7	GO:0005488=>binding=>y9963_dicdi ame: full=probable serine threonine-protein kinase ddb_g0272254;GO:0005622=>intracellular=>y9963_dicdi ame: full=probable serine threonine-protein kinase ddb_g0272254;GO:0007165=>signal transduction=>y9963_dicdi ame: full=probable serine threonine-protein kinase ddb_g0272254;GO:0016772=>transferase activity, transferring phosphorus-containing groups=>y9963_dicdi a…	PF00069=>Protein kinase domain;	IPR011009 (Protein kinase-like domain)
RirG078960	7	GO:0002009=>morphogenesis of an epithelium=>y9963_dicdi ame: full=probable serine threonine-protein kinase ddb_g0272254;GO:0002224=>toll-like receptor signaling pathway=>y9963_dicdi ame: full=probable serine threonine-protein kinase ddb_g0272254;GO:0002252=>immune effector process=>y9963_dicdi ame: full=probable serine threonine-protein kinase ddb_g0272254;GO:0004674=>protein serine/threonine kin…	PF07714=>Protein tyrosine kinase;	IPR011009 (Protein kinase-like domain)
RirG111060	7	GO:0005488=>binding=>y9963_dicdi ame: full=probable serine threonine-protein kinase ddb_g0272254;GO:0016740=>transferase activity=>y9963_dicdi ame: full=probable serine threonine-protein kinase ddb_g0272254;GO:0044424=>intracellular part=>y9963_dicdi ame: full=probable serine threonine-protein kinase ddb_g0272254);	PF07714=>Protein tyrosine kinase;	IPR011009 (Protein kinase-like domain)
RirG272650	7	GO:0001816=>cytokine production=>phg2_dicdi ame: full=serine threonine-protein kinase phg2;GO:0002224=>toll-like receptor signaling pathway=>phg2_dicdi ame: full=serine threonine-protein kinase phg2;GO:0004672=>protein kinase activity=>phg2_dicdi ame: full=serine threonine-protein kinase phg2;GO:0005515=>protein binding=>phg2_dicdi ame: full=serine threonine-protein kinase phg2;GO:0005737=>cytopl…	PF00069=>Protein kinase domain;	IPR011009 (Protein kinase-like domain)
RirG123260	7	GO:0001819=>positive regulation of cytokine production=>y9963_dicdi ame: full=probable serine threonine-protein kinase ddb_g0272254;GO:0002009=>morphogenesis of an epithelium=>y9963_dicdi ame: full=probable serine threonine-protein kinase ddb_g0272254;GO:0002224=>toll-like receptor signaling pathway=>y9963_dicdi ame: full=probable serine threonine-protein kinase ddb_g0272254;GO:0002252=>immune ef…	PF07714=>Protein tyrosine kinase;	IPR011009 (Protein kinase-like domain)
RirG103820	7	GO:0004672=>protein kinase activity=>yr831_mimiv ame: full= serine threonine-protein kinase receptor r831 flags: precursor;GO:0005488=>binding=>yr831_mimiv ame: full= serine threonine-protein kinase receptor r831 flags: precursor;GO:0006139=>nucleobase-containing compound metabolic process=>yr831_mimiv ame: full= serine threonine-protein kinase receptor r831 flags: precursor;GO:0006952=>defense r…	PF00069=>Protein kinase domain;	IPR011009 (Protein kinase-like domain)
RirG216350	7	GO:0002224=>toll-like receptor signaling pathway=>y9963_dicdi ame: full=probable serine threonine-protein kinase ddb_g0272254;GO:0004672=>protein kinase activity=>y9963_dicdi ame: full=probable serine threonine-protein kinase ddb_g0272254;GO:0005488=>binding=>y9963_dicdi ame: full=probable serine threonine-protein kinase ddb_g0272254;GO:0006139=>nucleobase-containing compound metabolic process=>y…	PF07714=>Protein tyrosine kinase;	IPR011009 (Protein kinase-like domain)
RirG222200	7	GO:0002224=>toll-like receptor signaling pathway=>roco8_dicdi ame: full=probable serine threonine-protein kinase roco8 ame: full=ras of complex proteins and c-terminal of roc 8;GO:0004672=>protein kinase activity=>roco8_dicdi ame: full=probable serine threonine-protein kinase roco8 ame: full=ras of complex proteins and c-terminal of roc 8;GO:0005488=>binding=>roco8_dicdi ame: full=probable serine…	PF07714=>Protein tyrosine kinase;	IPR011009 (Protein kinase-like domain; IPR016184 (Capsid/spike protein, ssDNA virus)
RirG068180	7	GO:0002009=>morphogenesis of an epithelium=>phg2_dicdi ame: full=serine threonine-protein kinase phg2;GO:0002224=>toll-like receptor signaling pathway=>phg2_dicdi ame: full=serine threonine-protein kinase phg2;GO:0002252=>immune effector process=>phg2_dicdi ame: full=serine threonine-protein kinase phg2;GO:0004674=>protein serine/threonine kinase activity=>phg2_dicdi ame: full=serine threonine-pr…	PF00069=>Protein kinase domain;	IPR011009 (Protein kinase-like domain)
RirG272060	7	GO:0001819=>positive regulation of cytokine production=>phg2_dicdi ame: full=serine threonine-protein kinase phg2;GO:0002224=>toll-like receptor signaling pathway=>phg2_dicdi ame: full=serine threonine-protein kinase phg2;GO:0004672=>protein kinase activity=>phg2_dicdi ame: full=serine threonine-protein kinase phg2;GO:0005515=>protein binding=>phg2_dicdi ame: full=serine threonine-protein kinase …	PF07714=>Protein tyrosine kinase;	IPR011009 (Protein kinase-like domain)
RirG180170	7	GO:0000186=>activation of MAPKK activity=>gdt4_dicdi ame: full=probable serine threonine-protein kinase gdt4 ame: full=growth-differentiation transition protein 4 flags: precursor;GO:0001819=>positive regulation of cytokine production=>gdt4_dicdi ame: full=probable serine threonine-protein kinase gdt4 ame: full=growth-differentiation transition protein 4 flags: precursor;GO:0002009=>morphogenesis…	PF00069=>Protein kinase domain;	IPR011009 (Protein kinase-like domain)
RirG214170	7	GO:0001816=>cytokine production=>qkga_dicdi ame: full=probable serine threonine-protein kinase qkga ame: full=quick growth protein qkga ame: full=ras of complex proteins and c-terminal of roc 2;GO:0002376=>immune system process=>qkga_dicdi ame: full=probable serine threonine-protein kinase qkga ame: full=quick growth protein qkga ame: full=ras of complex proteins and c-terminal of roc 2;GO:000467…	PF00069=>Protein kinase domain;PF07714=>Protein tyrosine kinase;	IPR011009 (Protein kinase-like domain)
RirG184920	7	GO:0000775=>chromosome, centromeric region=>y9844_dicdi ame: full=probable serine threonine-protein kinase ddb_g0282963;GO:0004672=>protein kinase activity=>y9844_dicdi ame: full=probable serine threonine-protein kinase ddb_g0282963;GO:0005515=>protein binding=>y9844_dicdi ame: full=probable serine threonine-protein kinase ddb_g0282963;GO:0007254=>JNK cascade=>y9844_dicdi ame: full=probable serin…	PF00069=>Protein kinase domain;	IPR011009 (Protein kinase-like domain)
RirG115680	7	GO:0002224=>toll-like receptor signaling pathway=>roco7_dicdi ame: full=probable serine threonine-protein kinase roco7 ame: full=ras of complex proteins and c-terminal of roc 7;GO:0004713=>protein tyrosine kinase activity=>roco7_dicdi ame: full=probable serine threonine-protein kinase roco7 ame: full=ras of complex proteins and c-terminal of roc 7;GO:0004871=>signal transducer activity=>roco7_dic…	PF07714=>Protein tyrosine kinase;	IPR011009 (Protein kinase-like domain)
RirG065750	7	GO:0002224=>toll-like receptor signaling pathway=>y9963_dicdi ame: full=probable serine threonine-protein kinase ddb_g0272254;GO:0004672=>protein kinase activity=>y9963_dicdi ame: full=probable serine threonine-protein kinase ddb_g0272254;GO:0005488=>binding=>y9963_dicdi ame: full=probable serine threonine-protein kinase ddb_g0272254;GO:0006139=>nucleobase-containing compound metabolic process=>y…	PF07714=>Protein tyrosine kinase;	IPR011009 (Protein kinase-like domain)
RirG211420	7	GO:0005737=>cytoplasm=>y9963_dicdi ame: full=probable serine threonine-protein kinase ddb_g0272254;GO:0016772=>transferase activity, transferring phosphorus-containing groups=>y9963_dicdi ame: full=probable serine threonine-protein kinase ddb_g0272254;GO:0043229=>intracellular organelle=>y9963_dicdi ame: full=probable serine threonine-protein kinase ddb_g0272254;GO:0051298=>centrosome duplication…	PF07714=>Protein tyrosine kinase;	IPR011009 (Protein kinase-like domain)
RirG209530	7	GO:0002224=>toll-like receptor signaling pathway=>phg2_dicdi ame: full=serine threonine-protein kinase phg2;GO:0004674=>protein serine/threonine kinase activity=>phg2_dicdi ame: full=serine threonine-protein kinase phg2;GO:0006139=>nucleobase-containing compound metabolic process=>phg2_dicdi ame: full=serine threonine-protein kinase phg2;GO:0007166=>cell surface receptor signaling pathway=>phg2_d…	PF07714=>Protein tyrosine kinase;	IPR011009 (Protein kinase-like domain)
RirG085160	7	GO:0001819=>positive regulation of cytokine production=>yr831_mimiv ame: full= serine threonine-protein kinase receptor r831 flags: precursor;GO:0002224=>toll-like receptor signaling pathway=>yr831_mimiv ame: full= serine threonine-protein kinase receptor r831 flags: precursor;GO:0004672=>protein kinase activity=>yr831_mimiv ame: full= serine threonine-protein kinase receptor r831 flags: precurso…	PF07714=>Protein tyrosine kinase;	IPR011009 (Protein kinase-like domain)
RirG144710	7	GO:0001816=>cytokine production=>y9963_dicdi ame: full=probable serine threonine-protein kinase ddb_g0272254;GO:0004674=>protein serine/threonine kinase activity=>y9963_dicdi ame: full=probable serine threonine-protein kinase ddb_g0272254;GO:0006139=>nucleobase-containing compound metabolic process=>y9963_dicdi ame: full=probable serine threonine-protein kinase ddb_g0272254;GO:0006955=>immune res…	PF07714=>Protein tyrosine kinase;	IPR011009 (Protein kinase-like domain)
RirG152840	7	GO:0002224=>toll-like receptor signaling pathway=>y9963_dicdi ame: full=probable serine threonine-protein kinase ddb_g0272254;GO:0004672=>protein kinase activity=>y9963_dicdi ame: full=probable serine threonine-protein kinase ddb_g0272254;GO:0005488=>binding=>y9963_dicdi ame: full=probable serine threonine-protein kinase ddb_g0272254;GO:0006139=>nucleobase-containing compound metabolic process=>y…	PF07714=>Protein tyrosine kinase;	IPR011009 (Protein kinase-like domain)
RirG226220	7	GO:0001819=>positive regulation of cytokine production=>yr831_mimiv ame: full= serine threonine-protein kinase receptor r831 flags: precursor;GO:0002224=>toll-like receptor signaling pathway=>yr831_mimiv ame: full= serine threonine-protein kinase receptor r831 flags: precursor;GO:0004672=>protein kinase activity=>yr831_mimiv ame: full= serine threonine-protein kinase receptor r831 flags: precurso…	PF07714=>Protein tyrosine kinase;	IPR011009 (Protein kinase-like domain)
RirG239070	7	GO:0001819=>positive regulation of cytokine production=>yr831_mimiv ame: full= serine threonine-protein kinase receptor r831 flags: precursor;GO:0002224=>toll-like receptor signaling pathway=>yr831_mimiv ame: full= serine threonine-protein kinase receptor r831 flags: precursor;GO:0004672=>protein kinase activity=>yr831_mimiv ame: full= serine threonine-protein kinase receptor r831 flags: precurso…	PF00069=>Protein kinase domain;	IPR011009 (Protein kinase-like domain)
RirG087250	7	GO:0000165=>MAPK cascade=>yr831_mimiv ame: full= serine threonine-protein kinase receptor r831 flags: precursor;GO:0004672=>protein kinase activity=>yr831_mimiv ame: full= serine threonine-protein kinase receptor r831 flags: precursor;GO:0005488=>binding=>yr831_mimiv ame: full= serine threonine-protein kinase receptor r831 flags: precursor;GO:0010627=>regulation of intracellular protein kinase ca…	PF00069=>Protein kinase domain;	IPR011009 (Protein kinase-like domain)
RirG111240	7	GO:0001819=>positive regulation of cytokine production=>ripk1_mouse ame: full=receptor-interacting serine threonine-protein kinase 1 ame: full=cell death protein rip ame: full=receptor-interacting protein 1 short=rip-1 ame: full=serine threonine-protein kinase rip;GO:0002224=>toll-like receptor signaling pathway=>ripk1_mouse ame: full=receptor-interacting serine threonine-protein kinase 1 ame: fu…	PF00069=>Protein kinase domain;	IPR011009 (Protein kinase-like domain)
RirG205680	7	GO:0001819=>positive regulation of cytokine production=>y1199_dicdi ame: full=probable serine threonine-protein kinase ddb_g0282895;GO:0002224=>toll-like receptor signaling pathway=>y1199_dicdi ame: full=probable serine threonine-protein kinase ddb_g0282895;GO:0004672=>protein kinase activity=>y1199_dicdi ame: full=probable serine threonine-protein kinase ddb_g0282895;GO:0005515=>protein binding=…	PF00069=>Protein kinase domain;	IPR011009 (Protein kinase-like domain)
RirG264120	7	GO:0016740=>transferase activity=>phg2_dicdi ame: full=serine threonine-protein kinase phg2);	PF07714=>Protein tyrosine kinase;	IPR011009 (Protein kinase-like domain)
RirG052560	7	GO:0002009=>morphogenesis of an epithelium=>y9963_dicdi ame: full=probable serine threonine-protein kinase ddb_g0272254;GO:0002224=>toll-like receptor signaling pathway=>y9963_dicdi ame: full=probable serine threonine-protein kinase ddb_g0272254;GO:0002252=>immune effector process=>y9963_dicdi ame: full=probable serine threonine-protein kinase ddb_g0272254;GO:0004674=>protein serine/threonine kin…	PF07714=>Protein tyrosine kinase;	IPR011009 (Protein kinase-like domain)
RirG158960	7	GO:0002224=>toll-like receptor signaling pathway=>y9963_dicdi ame: full=probable serine threonine-protein kinase ddb_g0272254;GO:0004672=>protein kinase activity=>y9963_dicdi ame: full=probable serine threonine-protein kinase ddb_g0272254;GO:0005488=>binding=>y9963_dicdi ame: full=probable serine threonine-protein kinase ddb_g0272254;GO:0005737=>cytoplasm=>y9963_dicdi ame: full=probable serine th…	PF07714=>Protein tyrosine kinase;	IPR011009 (Protein kinase-like domain)
RirG235220	7	GO:0001819=>positive regulation of cytokine production=>y9844_dicdi ame: full=probable serine threonine-protein kinase ddb_g0282963;GO:0002224=>toll-like receptor signaling pathway=>y9844_dicdi ame: full=probable serine threonine-protein kinase ddb_g0282963;GO:0004674=>protein serine/threonine kinase activity=>y9844_dicdi ame: full=probable serine threonine-protein kinase ddb_g0282963;GO:0005515=…	PF00069=>Protein kinase domain;	IPR011009 (Protein kinase-like domain)
RirG111360	7	GO:0001819=>positive regulation of cytokine production=>yr826_mimiv ame: full= serine threonine-protein kinase receptor r826 flags: precursor;GO:0002224=>toll-like receptor signaling pathway=>yr826_mimiv ame: full= serine threonine-protein kinase receptor r826 flags: precursor;GO:0004672=>protein kinase activity=>yr826_mimiv ame: full= serine threonine-protein kinase receptor r826 flags: precurso…	PF00069=>Protein kinase domain;	IPR011009 (Protein kinase-like domain)
RirG197980	7	GO:0000165=>MAPK cascade=>gdt4_dicdi ame: full=probable serine threonine-protein kinase gdt4 ame: full=growth-differentiation transition protein 4 flags: precursor;GO:0004674=>protein serine/threonine kinase activity=>gdt4_dicdi ame: full=probable serine threonine-protein kinase gdt4 ame: full=growth-differentiation transition protein 4 flags: precursor;GO:0006468=>protein phosphorylation=>gdt4_d…	PF00069=>Protein kinase domain;	IPR011009 (Protein kinase-like domain)
RirG086670	7	GO:0002224=>toll-like receptor signaling pathway=>yr818_mimiv ame: full= serine threonine-protein kinase receptor r818 flags: precursor;GO:0004672=>protein kinase activity=>yr818_mimiv ame: full= serine threonine-protein kinase receptor r818 flags: precursor;GO:0005488=>binding=>yr818_mimiv ame: full= serine threonine-protein kinase receptor r818 flags: precursor;GO:0006139=>nucleobase-containing…	PF00069=>Protein kinase domain;	IPR011009 (Protein kinase-like domain)
RirG232250	7	GO:0002224=>toll-like receptor signaling pathway=>roco5_dicdi ame: full=probable serine threonine-protein kinase roco5 ame: full=ras of complex proteins and c-terminal of roc 5;GO:0004672=>protein kinase activity=>roco5_dicdi ame: full=probable serine threonine-protein kinase roco5 ame: full=ras of complex proteins and c-terminal of roc 5;GO:0005488=>binding=>roco5_dicdi ame: full=probable serine…	PF07714=>Protein tyrosine kinase;	IPR011009 (Protein kinase-like domain)
RirG260890	7	GO:0001819=>positive regulation of cytokine production=>roco5_dicdi ame: full=probable serine threonine-protein kinase roco5 ame: full=ras of complex proteins and c-terminal of roc 5;GO:0002224=>toll-like receptor signaling pathway=>roco5_dicdi ame: full=probable serine threonine-protein kinase roco5 ame: full=ras of complex proteins and c-terminal of roc 5;GO:0004674=>protein serine/threonine ki…	PF00069=>Protein kinase domain;	IPR011009 (Protein kinase-like domain)
RirG085310	7	GO:0001819=>positive regulation of cytokine production=>spla_dicdi ame: full=dual specificity protein kinase spla ame: full=non-receptor tyrosine kinase spore lysis a ame: full=tyrosine-protein kinase 1;GO:0002224=>toll-like receptor signaling pathway=>spla_dicdi ame: full=dual specificity protein kinase spla ame: full=non-receptor tyrosine kinase spore lysis a ame: full=tyrosine-protein kinase 1…	PF07714=>Protein tyrosine kinase;	IPR011009 (Protein kinase-like domain)
RirG055180	7	GO:0001819=>positive regulation of cytokine production=>y9957_dicdi ame: full=probable serine threonine-protein kinase ddb_g0276181;GO:0002224=>toll-like receptor signaling pathway=>y9957_dicdi ame: full=probable serine threonine-protein kinase ddb_g0276181;GO:0004674=>protein serine/threonine kinase activity=>y9957_dicdi ame: full=probable serine threonine-protein kinase ddb_g0276181;GO:0004871=…	PF07714=>Protein tyrosine kinase;	IPR011009 (Protein kinase-like domain)
RirG228020	7	GO:0004672=>protein kinase activity=>drkd_dicdi ame: full=probable serine threonine-protein kinase drkd ame: full=receptor-like kinase d;GO:0016310=>phosphorylation=>drkd_dicdi ame: full=probable serine threonine-protein kinase drkd ame: full=receptor-like kinase d;GO:0044238=>primary metabolic process=>drkd_dicdi ame: full=probable serine threonine-protein kinase drkd ame: full=receptor-like kin…	PF00069=>Protein kinase domain;	IPR011009 (Protein kinase-like domain)
RirG116800	7	GO:0001819=>positive regulation of cytokine production=>roco8_dicdi ame: full=probable serine threonine-protein kinase roco8 ame: full=ras of complex proteins and c-terminal of roc 8;GO:0002224=>toll-like receptor signaling pathway=>roco8_dicdi ame: full=probable serine threonine-protein kinase roco8 ame: full=ras of complex proteins and c-terminal of roc 8;GO:0004674=>protein serine/threonine ki…	PF00069=>Protein kinase domain;	IPR011009 (Protein kinase-like domain)
RirG162020	7	GO:0001819=>positive regulation of cytokine production=>roco8_dicdi ame: full=probable serine threonine-protein kinase roco8 ame: full=ras of complex proteins and c-terminal of roc 8;GO:0002224=>toll-like receptor signaling pathway=>roco8_dicdi ame: full=probable serine threonine-protein kinase roco8 ame: full=ras of complex proteins and c-terminal of roc 8;GO:0004674=>protein serine/threonine ki…	PF07714=>Protein tyrosine kinase;	IPR011009 (Protein kinase-like domain)
RirG134870	7	GO:0001819=>positive regulation of cytokine production=>gdt4_dicdi ame: full=probable serine threonine-protein kinase gdt4 ame: full=growth-differentiation transition protein 4 flags: precursor;GO:0002224=>toll-like receptor signaling pathway=>gdt4_dicdi ame: full=probable serine threonine-protein kinase gdt4 ame: full=growth-differentiation transition protein 4 flags: precursor;GO:0004706=>JUN k…	PF07714=>Protein tyrosine kinase;	IPR011009 (Protein kinase-like domain)
RirG242590	7	GO:0002376=>immune system process=>y1571_arath ame: full=probable leucine-rich repeat receptor-like protein kinase at1g35710 flags: precursor;GO:0004672=>protein kinase activity=>y1571_arath ame: full=probable leucine-rich repeat receptor-like protein kinase at1g35710 flags: precursor;GO:0005488=>binding=>y1571_arath ame: full=probable leucine-rich repeat receptor-like protein kinase at1g35710 fl…	PF00069=>Protein kinase domain;	IPR011009 (Protein kinase-like domain)
RirG064010	7	GO:0001819=>positive regulation of cytokine production=>phg2_dicdi ame: full=serine threonine-protein kinase phg2;GO:0002224=>toll-like receptor signaling pathway=>phg2_dicdi ame: full=serine threonine-protein kinase phg2;GO:0004672=>protein kinase activity=>phg2_dicdi ame: full=serine threonine-protein kinase phg2;GO:0005515=>protein binding=>phg2_dicdi ame: full=serine threonine-protein kinase …	PF00069=>Protein kinase domain;	IPR011009 (Protein kinase-like domain)
RirG110270	7		PF07714=>Protein tyrosine kinase;	IPR011009 (Protein kinase-like domain)
RirG110280	7	GO:0016301=>kinase activity=>y9957_dicdi ame: full=probable serine threonine-protein kinase ddb_g0276181);	PF07714=>Protein tyrosine kinase;	IPR011009 (Protein kinase-like domain)
RirG148750	7	GO:0000186=>activation of MAPKK activity=>yr831_mimiv ame: full= serine threonine-protein kinase receptor r831 flags: precursor;GO:0000187=>activation of MAPK activity=>yr831_mimiv ame: full= serine threonine-protein kinase receptor r831 flags: precursor;GO:0002224=>toll-like receptor signaling pathway=>yr831_mimiv ame: full= serine threonine-protein kinase receptor r831 flags: precursor;GO:00027…	PF00069=>Protein kinase domain;	IPR011009 (Protein kinase-like domain)
RirG075020	7	GO:0001819=>positive regulation of cytokine production=>y9957_dicdi ame: full=probable serine threonine-protein kinase ddb_g0276181;GO:0002009=>morphogenesis of an epithelium=>y9957_dicdi ame: full=probable serine threonine-protein kinase ddb_g0276181;GO:0002224=>toll-like receptor signaling pathway=>y9957_dicdi ame: full=probable serine threonine-protein kinase ddb_g0276181;GO:0002252=>immune ef…	PF07714=>Protein tyrosine kinase;	IPR011009 (Protein kinase-like domain)
RirG162370	7	GO:0009987=>cellular process=>phg2_dicdi ame: full=serine threonine-protein kinase phg2;GO:0016020=>membrane=>phg2_dicdi ame: full=serine threonine-protein kinase phg2;GO:0016301=>kinase activity=>phg2_dicdi ame: full=serine threonine-protein kinase phg2;GO:0044464=>cell part=>phg2_dicdi ame: full=serine threonine-protein kinase phg2;GO:0050896=>response to stimulus=>phg2_dicdi ame: full=serine t…	PF07714=>Protein tyrosine kinase;	IPR011009 (Protein kinase-like domain; IPR011042 (Six-bladed beta-propeller, TolB-like)
RirG157550	7	GO:0002224=>toll-like receptor signaling pathway=>y9844_dicdi ame: full=probable serine threonine-protein kinase ddb_g0282963;GO:0004672=>protein kinase activity=>y9844_dicdi ame: full=probable serine threonine-protein kinase ddb_g0282963;GO:0005488=>binding=>y9844_dicdi ame: full=probable serine threonine-protein kinase ddb_g0282963;GO:0006139=>nucleobase-containing compound metabolic process=>y…	PF07714=>Protein tyrosine kinase;	IPR011009 (Protein kinase-like domain)
RirG241510	7	GO:0002224=>toll-like receptor signaling pathway=>y9844_dicdi ame: full=probable serine threonine-protein kinase ddb_g0282963;GO:0004672=>protein kinase activity=>y9844_dicdi ame: full=probable serine threonine-protein kinase ddb_g0282963;GO:0005488=>binding=>y9844_dicdi ame: full=probable serine threonine-protein kinase ddb_g0282963;GO:0006139=>nucleobase-containing compound metabolic process=>y…	PF07714=>Protein tyrosine kinase;	IPR011009 (Protein kinase-like domain)
RirG248650	7	GO:0005488=>binding=>phg2_dicdi ame: full=serine threonine-protein kinase phg2;GO:0007165=>signal transduction=>phg2_dicdi ame: full=serine threonine-protein kinase phg2;GO:0016301=>kinase activity=>phg2_dicdi ame: full=serine threonine-protein kinase phg2);	PF07714=>Protein tyrosine kinase;	IPR011009 (Protein kinase-like domain)
RirG118430	7	GO:0009987=>cellular process=>y9844_dicdi ame: full=probable serine threonine-protein kinase ddb_g0282963;GO:0016301=>kinase activity=>y9844_dicdi ame: full=probable serine threonine-protein kinase ddb_g0282963);	PF07714=>Protein tyrosine kinase;	IPR011009 (Protein kinase-like domain)
RirG110400	7	GO:0001819=>positive regulation of cytokine production=>yr831_mimiv ame: full= serine threonine-protein kinase receptor r831 flags: precursor;GO:0002224=>toll-like receptor signaling pathway=>yr831_mimiv ame: full= serine threonine-protein kinase receptor r831 flags: precursor;GO:0004674=>protein serine/threonine kinase activity=>yr831_mimiv ame: full= serine threonine-protein kinase receptor r83…	PF00069=>Protein kinase domain;PF07714=>Protein tyrosine kinase;	IPR011009 (Protein kinase-like domain)
RirG144460	7	GO:0002224=>toll-like receptor signaling pathway=>y9844_dicdi ame: full=probable serine threonine-protein kinase ddb_g0282963;GO:0004672=>protein kinase activity=>y9844_dicdi ame: full=probable serine threonine-protein kinase ddb_g0282963;GO:0005488=>binding=>y9844_dicdi ame: full=probable serine threonine-protein kinase ddb_g0282963;GO:0007166=>cell surface receptor signaling pathway=>y9844_dicd…	PF07714=>Protein tyrosine kinase;	IPR011009 (Protein kinase-like domain)
RirG135010	7	GO:0004672=>protein kinase activity=>y9844_dicdi ame: full=probable serine threonine-protein kinase ddb_g0282963;GO:0005515=>protein binding=>y9844_dicdi ame: full=probable serine threonine-protein kinase ddb_g0282963;GO:0005737=>cytoplasm=>y9844_dicdi ame: full=probable serine threonine-protein kinase ddb_g0282963;GO:0009987=>cellular process=>y9844_dicdi ame: full=probable serine threonine-prot…	PF00069=>Protein kinase domain;	IPR011009 (Protein kinase-like domain)
RirG262030	7	GO:0004672=>protein kinase activity=>y9844_dicdi ame: full=probable serine threonine-protein kinase ddb_g0282963;GO:0006468=>protein phosphorylation=>y9844_dicdi ame: full=probable serine threonine-protein kinase ddb_g0282963;GO:0009875=>pollen-pistil interaction=>y9844_dicdi ame: full=probable serine threonine-protein kinase ddb_g0282963;GO:0044464=>cell part=>y9844_dicdi ame: full=probable seri…	PF07714=>Protein tyrosine kinase;	IPR011009 (Protein kinase-like domain)
RirG262040	7	GO:0004672=>protein kinase activity=>y9851_dicdi ame: full=probable serine threonine-protein kinase ddb_g0275165;GO:0005488=>binding=>y9851_dicdi ame: full=probable serine threonine-protein kinase ddb_g0275165;GO:0006468=>protein phosphorylation=>y9851_dicdi ame: full=probable serine threonine-protein kinase ddb_g0275165;GO:0007050=>cell cycle arrest=>y9851_dicdi ame: full=probable serine threoni…	PF07714=>Protein tyrosine kinase;	IPR011009 (Protein kinase-like domain)
RirG095610	7	GO:0000165=>MAPK cascade=>y9844_dicdi ame: full=probable serine threonine-protein kinase ddb_g0282963;GO:0004672=>protein kinase activity=>y9844_dicdi ame: full=probable serine threonine-protein kinase ddb_g0282963;GO:0005488=>binding=>y9844_dicdi ame: full=probable serine threonine-protein kinase ddb_g0282963;GO:0006950=>response to stress=>y9844_dicdi ame: full=probable serine threonine-protein…	PF07714=>Protein tyrosine kinase;	IPR011009 (Protein kinase-like domain)
RirG235630	7	GO:0004672=>protein kinase activity=>yr831_mimiv ame: full= serine threonine-protein kinase receptor r831 flags: precursor;GO:0005488=>binding=>yr831_mimiv ame: full= serine threonine-protein kinase receptor r831 flags: precursor;GO:0007154=>cell communication=>yr831_mimiv ame: full= serine threonine-protein kinase receptor r831 flags: precursor;GO:0016020=>membrane=>yr831_mimiv ame: full= serine…	PF07714=>Protein tyrosine kinase;	IPR011009 (Protein kinase-like domain)
RirG077860	7	GO:0002224=>toll-like receptor signaling pathway=>y9844_dicdi ame: full=probable serine threonine-protein kinase ddb_g0282963;GO:0004672=>protein kinase activity=>y9844_dicdi ame: full=probable serine threonine-protein kinase ddb_g0282963;GO:0005488=>binding=>y9844_dicdi ame: full=probable serine threonine-protein kinase ddb_g0282963;GO:0005737=>cytoplasm=>y9844_dicdi ame: full=probable serine th…	PF07714=>Protein tyrosine kinase;	IPR011009 (Protein kinase-like domain)
RirG065680	7	GO:0001819=>positive regulation of cytokine production=>y9844_dicdi ame: full=probable serine threonine-protein kinase ddb_g0282963;GO:0002221=>pattern recognition receptor signaling pathway=>y9844_dicdi ame: full=probable serine threonine-protein kinase ddb_g0282963;GO:0002250=>adaptive immune response=>y9844_dicdi ame: full=probable serine threonine-protein kinase ddb_g0282963;GO:0004672=>prote…	PF07714=>Protein tyrosine kinase;	IPR011009 (Protein kinase-like domain)
RirG117010	7	GO:0004674=>protein serine/threonine kinase activity=>y1199_dicdi ame: full=probable serine threonine-protein kinase ddb_g0282895;GO:0005515=>protein binding=>y1199_dicdi ame: full=probable serine threonine-protein kinase ddb_g0282895;GO:0005737=>cytoplasm=>y1199_dicdi ame: full=probable serine threonine-protein kinase ddb_g0282895;GO:0006351=>transcription, DNA-dependent=>y1199_dicdi ame: full=p…	PF00069=>Protein kinase domain;	IPR011009 (Protein kinase-like domain)
RirG140160	7	GO:0006950=>response to stress=>spk1_dugti ame: full=tyrosine-protein kinase spk-1;GO:0007154=>cell communication=>spk1_dugti ame: full=tyrosine-protein kinase spk-1;GO:0016020=>membrane=>spk1_dugti ame: full=tyrosine-protein kinase spk-1;GO:0016301=>kinase activity=>spk1_dugti ame: full=tyrosine-protein kinase spk-1;GO:0044464=>cell part=>spk1_dugti ame: full=tyrosine-protein kinase spk-1;GO:005…	PF07714=>Protein tyrosine kinase;	IPR011009 (Protein kinase-like domain)
RirG185830	7	GO:0001775=>cell activation=>phg2_dicdi ame: full=serine threonine-protein kinase phg2;GO:0002684=>positive regulation of immune system process=>phg2_dicdi ame: full=serine threonine-protein kinase phg2;GO:0005488=>binding=>phg2_dicdi ame: full=serine threonine-protein kinase phg2;GO:0006139=>nucleobase-containing compound metabolic process=>phg2_dicdi ame: full=serine threonine-protein kinase ph…	PF07714=>Protein tyrosine kinase;	IPR011009 (Protein kinase-like domain)
RirG181710	7	GO:0001775=>cell activation=>phg2_dicdi ame: full=serine threonine-protein kinase phg2;GO:0002684=>positive regulation of immune system process=>phg2_dicdi ame: full=serine threonine-protein kinase phg2;GO:0005515=>protein binding=>phg2_dicdi ame: full=serine threonine-protein kinase phg2;GO:0006139=>nucleobase-containing compound metabolic process=>phg2_dicdi ame: full=serine threonine-protein k…	PF07714=>Protein tyrosine kinase;	IPR011009 (Protein kinase-like domain)
RirG070910	7	GO:0004672=>protein kinase activity=>y9844_dicdi ame: full=probable serine threonine-protein kinase ddb_g0282963;GO:0005488=>binding=>y9844_dicdi ame: full=probable serine threonine-protein kinase ddb_g0282963;GO:0006468=>protein phosphorylation=>y9844_dicdi ame: full=probable serine threonine-protein kinase ddb_g0282963;GO:0006950=>response to stress=>y9844_dicdi ame: full=probable serine threon…	PF07714=>Protein tyrosine kinase;	IPR011009 (Protein kinase-like domain)
RirG123570	7	GO:0004672=>protein kinase activity=>y9844_dicdi ame: full=probable serine threonine-protein kinase ddb_g0282963;GO:0005488=>binding=>y9844_dicdi ame: full=probable serine threonine-protein kinase ddb_g0282963;GO:0006468=>protein phosphorylation=>y9844_dicdi ame: full=probable serine threonine-protein kinase ddb_g0282963;GO:0006950=>response to stress=>y9844_dicdi ame: full=probable serine threon…	PF07714=>Protein tyrosine kinase;	IPR011009 (Protein kinase-like domain)
RirG218630	7	GO:0004672=>protein kinase activity=>y9844_dicdi ame: full=probable serine threonine-protein kinase ddb_g0282963;GO:0005488=>binding=>y9844_dicdi ame: full=probable serine threonine-protein kinase ddb_g0282963;GO:0006468=>protein phosphorylation=>y9844_dicdi ame: full=probable serine threonine-protein kinase ddb_g0282963;GO:0006950=>response to stress=>y9844_dicdi ame: full=probable serine threon…	PF07714=>Protein tyrosine kinase;	IPR011009 (Protein kinase-like domain)
RirG095130	7	GO:0016301=>kinase activity=>spk1_dugti ame: full=tyrosine-protein kinase spk-1);	PF07714=>Protein tyrosine kinase;	IPR011009 (Protein kinase-like domain)
RirG202470	7	GO:0002224=>toll-like receptor signaling pathway=>ytyk2_dicdi ame: full=probable tyrosine-protein kinase ddb_g0283397;GO:0004672=>protein kinase activity=>ytyk2_dicdi ame: full=probable tyrosine-protein kinase ddb_g0283397;GO:0005488=>binding=>ytyk2_dicdi ame: full=probable tyrosine-protein kinase ddb_g0283397;GO:0006139=>nucleobase-containing compound metabolic process=>ytyk2_dicdi ame: full=pro…	PF07714=>Protein tyrosine kinase;	IPR011009 (Protein kinase-like domain)
RirG173910	7	GO:0009987=>cellular process=>yr831_mimiv ame: full= serine threonine-protein kinase receptor r831 flags: precursor;GO:0016301=>kinase activity=>yr831_mimiv ame: full= serine threonine-protein kinase receptor r831 flags: precursor);	PF07714=>Protein tyrosine kinase;	IPR011009 (Protein kinase-like domain)
RirG150290	7	GO:0001819=>positive regulation of cytokine production=>phg2_dicdi ame: full=serine threonine-protein kinase phg2;GO:0002221=>pattern recognition receptor signaling pathway=>phg2_dicdi ame: full=serine threonine-protein kinase phg2;GO:0002822=>regulation of adaptive immune response based on somatic recombination of immune receptors built from immunoglobulin superfamily domains=>phg2_dicdi ame: fu…	PF07714=>Protein tyrosine kinase;	IPR011009 (Protein kinase-like domain; IPR011042 (Six-bladed beta-propeller, TolB-like)
RirG231800	7	GO:0000165=>MAPK cascade=>y9844_dicdi ame: full=probable serine threonine-protein kinase ddb_g0282963;GO:0004674=>protein serine/threonine kinase activity=>y9844_dicdi ame: full=probable serine threonine-protein kinase ddb_g0282963;GO:0006468=>protein phosphorylation=>y9844_dicdi ame: full=probable serine threonine-protein kinase ddb_g0282963;GO:0006810=>transport=>y9844_dicdi ame: full=probable …	PF07714=>Protein tyrosine kinase;	IPR011009 (Protein kinase-like domain)
RirG262010	7	GO:0004672=>protein kinase activity=>spk1_dugti ame: full=tyrosine-protein kinase spk-1;GO:0005515=>protein binding=>spk1_dugti ame: full=tyrosine-protein kinase spk-1;GO:0005622=>intracellular=>spk1_dugti ame: full=tyrosine-protein kinase spk-1;GO:0005886=>plasma membrane=>spk1_dugti ame: full=tyrosine-protein kinase spk-1;GO:0006464=>cellular protein modification process=>spk1_dugti ame: full=t…	PF07714=>Protein tyrosine kinase;	IPR011009 (Protein kinase-like domain)
RirG267240	7	GO:0005003=>ephrin receptor activity=>y9844_dicdi ame: full=probable serine threonine-protein kinase ddb_g0282963;GO:0005488=>binding=>y9844_dicdi ame: full=probable serine threonine-protein kinase ddb_g0282963;GO:0005769=>early endosome=>y9844_dicdi ame: full=probable serine threonine-protein kinase ddb_g0282963;GO:0005886=>plasma membrane=>y9844_dicdi ame: full=probable serine threonine-protein…	PF07714=>Protein tyrosine kinase;	IPR011009 (Protein kinase-like domain)
RirG140450	7			IPR011009 (Protein kinase-like domain)
RirG201640	7	GO:0000165=>MAPK cascade=>phg2_dicdi ame: full=serine threonine-protein kinase phg2;GO:0001819=>positive regulation of cytokine production=>phg2_dicdi ame: full=serine threonine-protein kinase phg2;GO:0002224=>toll-like receptor signaling pathway=>phg2_dicdi ame: full=serine threonine-protein kinase phg2;GO:0004674=>protein serine/threonine kinase activity=>phg2_dicdi ame: full=serine threonine-p…	PF00069=>Protein kinase domain;	IPR011009 (Protein kinase-like domain)
RirG197740	7	GO:0001817=>regulation of cytokine production=>phg2_dicdi ame: full=serine threonine-protein kinase phg2;GO:0004672=>protein kinase activity=>phg2_dicdi ame: full=serine threonine-protein kinase phg2;GO:0005488=>binding=>phg2_dicdi ame: full=serine threonine-protein kinase phg2;GO:0005886=>plasma membrane=>phg2_dicdi ame: full=serine threonine-protein kinase phg2;GO:0007165=>signal transduction=>…	PF07714=>Protein tyrosine kinase;	IPR011009 (Protein kinase-like domain)
RirG150820	7			IPR011009 (Protein kinase-like domain)
RirG078880	7	GO:0004674=>protein serine/threonine kinase activity=>y9844_dicdi ame: full=probable serine threonine-protein kinase ddb_g0282963;GO:0005488=>binding=>y9844_dicdi ame: full=probable serine threonine-protein kinase ddb_g0282963;GO:0006468=>protein phosphorylation=>y9844_dicdi ame: full=probable serine threonine-protein kinase ddb_g0282963;GO:0007165=>signal transduction=>y9844_dicdi ame: full=prob…	PF07714=>Protein tyrosine kinase;	IPR011009 (Protein kinase-like domain)
RirG231850	7	GO:0004672=>protein kinase activity=>phg2_dicdi ame: full=serine threonine-protein kinase phg2;GO:0005488=>binding=>phg2_dicdi ame: full=serine threonine-protein kinase phg2;GO:0007275=>multicellular organismal development=>phg2_dicdi ame: full=serine threonine-protein kinase phg2;GO:0016310=>phosphorylation=>phg2_dicdi ame: full=serine threonine-protein kinase phg2;GO:0044238=>primary metabolic …	PF07714=>Protein tyrosine kinase;	IPR011009 (Protein kinase-like domain)
RirG110720	7			IPR011009 (Protein kinase-like domain)
RirG206520	7	GO:0004672=>protein kinase activity=>ytyk2_dicdi ame: full=probable tyrosine-protein kinase ddb_g0283397;GO:0005515=>protein binding=>ytyk2_dicdi ame: full=probable tyrosine-protein kinase ddb_g0283397;GO:0006468=>protein phosphorylation=>ytyk2_dicdi ame: full=probable tyrosine-protein kinase ddb_g0283397;GO:0016020=>membrane=>ytyk2_dicdi ame: full=probable tyrosine-protein kinase ddb_g0283397;GO…	PF07714=>Protein tyrosine kinase;	IPR011009 (Protein kinase-like domain)
RirG205820	7	GO:0016772=>transferase activity, transferring phosphorus-containing groups=>y9844_dicdi ame: full=probable serine threonine-protein kinase ddb_g0282963);	PF07714=>Protein tyrosine kinase;	IPR011009 (Protein kinase-like domain)
RirG247470	7	GO:0002224=>toll-like receptor signaling pathway=>spk1_dugti ame: full=tyrosine-protein kinase spk-1;GO:0004672=>protein kinase activity=>spk1_dugti ame: full=tyrosine-protein kinase spk-1;GO:0005488=>binding=>spk1_dugti ame: full=tyrosine-protein kinase spk-1;GO:0006139=>nucleobase-containing compound metabolic process=>spk1_dugti ame: full=tyrosine-protein kinase spk-1;GO:0007166=>cell surface …	PF07714=>Protein tyrosine kinase;	IPR011009 (Protein kinase-like domain)
RirG267230	7	GO:0001816=>cytokine production=>y1199_dicdi ame: full=probable serine threonine-protein kinase ddb_g0282895;GO:0002224=>toll-like receptor signaling pathway=>y1199_dicdi ame: full=probable serine threonine-protein kinase ddb_g0282895;GO:0004672=>protein kinase activity=>y1199_dicdi ame: full=probable serine threonine-protein kinase ddb_g0282895;GO:0005488=>binding=>y1199_dicdi ame: full=probable…	PF07714=>Protein tyrosine kinase;	IPR011009 (Protein kinase-like domain)
RirG108390	7	GO:0002224=>toll-like receptor signaling pathway=>y9844_dicdi ame: full=probable serine threonine-protein kinase ddb_g0282963;GO:0003008=>system process=>y9844_dicdi ame: full=probable serine threonine-protein kinase ddb_g0282963;GO:0004672=>protein kinase activity=>y9844_dicdi ame: full=probable serine threonine-protein kinase ddb_g0282963;GO:0005488=>binding=>y9844_dicdi ame: full=probable seri…	PF00069=>Protein kinase domain;	IPR011009 (Protein kinase-like domain)
RirG148760	7			IPR011009 (Protein kinase-like domain)
RirG267210	7	GO:0002224=>toll-like receptor signaling pathway=>phg2_dicdi ame: full=serine threonine-protein kinase phg2;GO:0004672=>protein kinase activity=>phg2_dicdi ame: full=serine threonine-protein kinase phg2;GO:0005488=>binding=>phg2_dicdi ame: full=serine threonine-protein kinase phg2;GO:0005737=>cytoplasm=>phg2_dicdi ame: full=serine threonine-protein kinase phg2;GO:0009966=>regulation of signal tra…	PF07714=>Protein tyrosine kinase;	IPR011009 (Protein kinase-like domain)
RirG070950	7	GO:0002224=>toll-like receptor signaling pathway=>y9844_dicdi ame: full=probable serine threonine-protein kinase ddb_g0282963;GO:0004672=>protein kinase activity=>y9844_dicdi ame: full=probable serine threonine-protein kinase ddb_g0282963;GO:0005488=>binding=>y9844_dicdi ame: full=probable serine threonine-protein kinase ddb_g0282963;GO:0006139=>nucleobase-containing compound metabolic process=>y…	PF07714=>Protein tyrosine kinase;	IPR011009 (Protein kinase-like domain)
RirG218980	7	GO:0004713=>protein tyrosine kinase activity=>rcka_dicdi ame: full=rgs domain-containing serine threonine-protein kinase a ame: full=rgs domain-containing serine threonine-protein kinase 1;GO:0006950=>response to stress=>rcka_dicdi ame: full=rgs domain-containing serine threonine-protein kinase a ame: full=rgs domain-containing serine threonine-protein kinase 1;GO:0007165=>signal transduction=>rc…	PF07714=>Protein tyrosine kinase;	IPR011009 (Protein kinase-like domain)
RirG243460	7			IPR011009 (Protein kinase-like domain)
RirG126020	7	GO:0004672=>protein kinase activity=>y9844_dicdi ame: full=probable serine threonine-protein kinase ddb_g0282963;GO:0005488=>binding=>y9844_dicdi ame: full=probable serine threonine-protein kinase ddb_g0282963;GO:0007165=>signal transduction=>y9844_dicdi ame: full=probable serine threonine-protein kinase ddb_g0282963;GO:0016020=>membrane=>y9844_dicdi ame: full=probable serine threonine-protein ki…	PF07714=>Protein tyrosine kinase;	IPR011009 (Protein kinase-like domain)
RirG231820	7	GO:0004672=>protein kinase activity=>y9844_dicdi ame: full=probable serine threonine-protein kinase ddb_g0282963;GO:0005515=>protein binding=>y9844_dicdi ame: full=probable serine threonine-protein kinase ddb_g0282963;GO:0005737=>cytoplasm=>y9844_dicdi ame: full=probable serine threonine-protein kinase ddb_g0282963;GO:0010942=>positive regulation of cell death=>y9844_dicdi ame: full=probable seri…	PF07714=>Protein tyrosine kinase;	IPR011009 (Protein kinase-like domain)
RirG187020	7			IPR011009 (Protein kinase-like domain)
RirG095140	7			IPR011009 (Protein kinase-like domain)
RirG216970	7	GO:0004672=>protein kinase activity=>roco5_dicdi ame: full=probable serine threonine-protein kinase roco5 ame: full=ras of complex proteins and c-terminal of roc 5;GO:0005488=>binding=>roco5_dicdi ame: full=probable serine threonine-protein kinase roco5 ame: full=ras of complex proteins and c-terminal of roc 5;GO:0006468=>protein phosphorylation=>roco5_dicdi ame: full=probable serine threonine-pr…	PF07714=>Protein tyrosine kinase;	IPR011009 (Protein kinase-like domain)
RirG134160	7	GO:0016772=>transferase activity, transferring phosphorus-containing groups=>phg2_dicdi ame: full=serine threonine-protein kinase phg2);	PF07714=>Protein tyrosine kinase;	IPR011009 (Protein kinase-like domain)
RirG150530	7			IPR011009 (Protein kinase-like domain)
RirG241440	7	GO:0005003=>ephrin receptor activity=>y9844_dicdi ame: full=probable serine threonine-protein kinase ddb_g0282963;GO:0005515=>protein binding=>y9844_dicdi ame: full=probable serine threonine-protein kinase ddb_g0282963;GO:0005768=>endosome=>y9844_dicdi ame: full=probable serine threonine-protein kinase ddb_g0282963;GO:0006139=>nucleobase-containing compound metabolic process=>y9844_dicdi ame: ful…	PF07714=>Protein tyrosine kinase;	IPR011009 (Protein kinase-like domain)
RirG072590	7	GO:0004672=>protein kinase activity=>ypk2_yeast ame: full=serine threonine-protein kinase ypk2 ykr2;GO:0005488=>binding=>ypk2_yeast ame: full=serine threonine-protein kinase ypk2 ykr2;GO:0008152=>metabolic process=>ypk2_yeast ame: full=serine threonine-protein kinase ypk2 ykr2;GO:0009987=>cellular process=>ypk2_yeast ame: full=serine threonine-protein kinase ypk2 ykr2;GO:0050896=>response to stim…	PF07714=>Protein tyrosine kinase;	IPR011009 (Protein kinase-like domain)
RirG107900	7	GO:0009987=>cellular process=>yr831_mimiv ame: full= serine threonine-protein kinase receptor r831 flags: precursor;GO:0016301=>kinase activity=>yr831_mimiv ame: full= serine threonine-protein kinase receptor r831 flags: precursor);	PF07714=>Protein tyrosine kinase;	IPR011009 (Protein kinase-like domain)
RirG231840	7	GO:0005003=>ephrin receptor activity=>spk1_dugti ame: full=tyrosine-protein kinase spk-1;GO:0005488=>binding=>spk1_dugti ame: full=tyrosine-protein kinase spk-1;GO:0005768=>endosome=>spk1_dugti ame: full=tyrosine-protein kinase spk-1;GO:0005886=>plasma membrane=>spk1_dugti ame: full=tyrosine-protein kinase spk-1;GO:0006468=>protein phosphorylation=>spk1_dugti ame: full=tyrosine-protein kinase spk…	PF07714=>Protein tyrosine kinase;	IPR011009 (Protein kinase-like domain)
RirG095770	7	GO:0000165=>MAPK cascade=>ytyk2_dicdi ame: full=probable tyrosine-protein kinase ddb_g0283397;GO:0004672=>protein kinase activity=>ytyk2_dicdi ame: full=probable tyrosine-protein kinase ddb_g0283397;GO:0005488=>binding=>ytyk2_dicdi ame: full=probable tyrosine-protein kinase ddb_g0283397;GO:0006950=>response to stress=>ytyk2_dicdi ame: full=probable tyrosine-protein kinase ddb_g0283397;GO:0007249=…	PF07714=>Protein tyrosine kinase;	IPR011009 (Protein kinase-like domain)
RirG160450	7	GO:0001775=>cell activation=>y9844_dicdi ame: full=probable serine threonine-protein kinase ddb_g0282963;GO:0002684=>positive regulation of immune system process=>y9844_dicdi ame: full=probable serine threonine-protein kinase ddb_g0282963;GO:0004674=>protein serine/threonine kinase activity=>y9844_dicdi ame: full=probable serine threonine-protein kinase ddb_g0282963;GO:0005515=>protein binding=>y…	PF00069=>Protein kinase domain;	IPR011009 (Protein kinase-like domain)
RirG237470	7			IPR011009 (Protein kinase-like domain)
RirG269930	7	GO:0002224=>toll-like receptor signaling pathway=>y9844_dicdi ame: full=probable serine threonine-protein kinase ddb_g0282963;GO:0005003=>ephrin receptor activity=>y9844_dicdi ame: full=probable serine threonine-protein kinase ddb_g0282963;GO:0005515=>protein binding=>y9844_dicdi ame: full=probable serine threonine-protein kinase ddb_g0282963;GO:0005886=>plasma membrane=>y9844_dicdi ame: full=pro…	PF07714=>Protein tyrosine kinase;	IPR011009 (Protein kinase-like domain)
RirG194910	7	GO:0000075=>cell cycle checkpoint=>y9844_dicdi ame: full=probable serine threonine-protein kinase ddb_g0282963;GO:0000166=>nucleotide binding=>y9844_dicdi ame: full=probable serine threonine-protein kinase ddb_g0282963;GO:0000187=>activation of MAPK activity=>y9844_dicdi ame: full=probable serine threonine-protein kinase ddb_g0282963;GO:0001819=>positive regulation of cytokine production=>y9844_d…	PF07714=>Protein tyrosine kinase;	IPR011009 (Protein kinase-like domain)
RirG256960	7	GO:0009987=>cellular process=>yr826_mimiv ame: full= serine threonine-protein kinase receptor r826 flags: precursor;GO:0016301=>kinase activity=>yr826_mimiv ame: full= serine threonine-protein kinase receptor r826 flags: precursor);	PF07714=>Protein tyrosine kinase;	IPR011009 (Protein kinase-like domain)
RirG195640	7	GO:0002224=>toll-like receptor signaling pathway=>y1199_dicdi ame: full=probable serine threonine-protein kinase ddb_g0282895;GO:0004672=>protein kinase activity=>y1199_dicdi ame: full=probable serine threonine-protein kinase ddb_g0282895;GO:0005488=>binding=>y1199_dicdi ame: full=probable serine threonine-protein kinase ddb_g0282895;GO:0007166=>cell surface receptor signaling pathway=>y1199_dicd…	PF07714=>Protein tyrosine kinase;	IPR011009 (Protein kinase-like domain)
RirG187010	7	GO:0004672=>protein kinase activity=>spka_dicdi ame: full=stress-activated protein kinase alpha short=sapk-alpha;GO:0005488=>binding=>spka_dicdi ame: full=stress-activated protein kinase alpha short=sapk-alpha;GO:0007275=>multicellular organismal development=>spka_dicdi ame: full=stress-activated protein kinase alpha short=sapk-alpha;GO:0016310=>phosphorylation=>spka_dicdi ame: full=stress-activa…	PF00069=>Protein kinase domain;	IPR011009 (Protein kinase-like domain)
RirG126000	7	GO:0002224=>toll-like receptor signaling pathway=>y1199_dicdi ame: full=probable serine threonine-protein kinase ddb_g0282895;GO:0004672=>protein kinase activity=>y1199_dicdi ame: full=probable serine threonine-protein kinase ddb_g0282895;GO:0005488=>binding=>y1199_dicdi ame: full=probable serine threonine-protein kinase ddb_g0282895;GO:0006139=>nucleobase-containing compound metabolic process=>y…	PF07714=>Protein tyrosine kinase;	IPR011009 (Protein kinase-like domain)
RirG143590	7	GO:0001819=>positive regulation of cytokine production=>y1199_dicdi ame: full=probable serine threonine-protein kinase ddb_g0282895;GO:0004674=>protein serine/threonine kinase activity=>y1199_dicdi ame: full=probable serine threonine-protein kinase ddb_g0282895;GO:0005488=>binding=>y1199_dicdi ame: full=probable serine threonine-protein kinase ddb_g0282895;GO:0005737=>cytoplasm=>y1199_dicdi ame: …	PF00069=>Protein kinase domain;	IPR011009 (Protein kinase-like domain)
RirG152200	7			IPR011009 (Protein kinase-like domain)
RirG147060	7			IPR011009 (Protein kinase-like domain)
RirG117600	7		PF07714=>Protein tyrosine kinase;	IPR011009 (Protein kinase-like domain)
RirG158970	7	GO:0004674=>protein serine/threonine kinase activity=>pyk3_dicdi ame: full=dual specificity protein kinase pyk3 ame: full=tyrosine-protein kinase 3;GO:0005515=>protein binding=>pyk3_dicdi ame: full=dual specificity protein kinase pyk3 ame: full=tyrosine-protein kinase 3;GO:0006468=>protein phosphorylation=>pyk3_dicdi ame: full=dual specificity protein kinase pyk3 ame: full=tyrosine-protein kinase…	PF07714=>Protein tyrosine kinase;	IPR011009 (Protein kinase-like domain)
RirG146170	7			IPR011009 (Protein kinase-like domain)
RirG111250	7			IPR011009 (Protein kinase-like domain)
RirG123530	7			IPR011009 (Protein kinase-like domain)
RirG218590	7			IPR011009 (Protein kinase-like domain)
RirG236910	7			IPR011009 (Protein kinase-like domain)
RirG068190	7			IPR011009 (Protein kinase-like domain)
RirG048770	7	GO:0006950=>response to stress=>phg2_dicdi ame: full=serine threonine-protein kinase phg2;GO:0007154=>cell communication=>phg2_dicdi ame: full=serine threonine-protein kinase phg2;GO:0016020=>membrane=>phg2_dicdi ame: full=serine threonine-protein kinase phg2;GO:0016301=>kinase activity=>phg2_dicdi ame: full=serine threonine-protein kinase phg2;GO:0051704=>multi-organism process=>phg2_dicdi ame: …	PF07714=>Protein tyrosine kinase;	IPR011009 (Protein kinase-like domain)
RirG049480	7	GO:0005003=>ephrin receptor activity=>y9844_dicdi ame: full=probable serine threonine-protein kinase ddb_g0282963;GO:0005515=>protein binding=>y9844_dicdi ame: full=probable serine threonine-protein kinase ddb_g0282963;GO:0005769=>early endosome=>y9844_dicdi ame: full=probable serine threonine-protein kinase ddb_g0282963;GO:0006468=>protein phosphorylation=>y9844_dicdi ame: full=probable serine t…	PF07714=>Protein tyrosine kinase;	IPR011009 (Protein kinase-like domain)
RirG098930	7	GO:0005003=>ephrin receptor activity=>y9963_dicdi ame: full=probable serine threonine-protein kinase ddb_g0272254;GO:0005515=>protein binding=>y9963_dicdi ame: full=probable serine threonine-protein kinase ddb_g0272254;GO:0009966=>regulation of signal transduction=>y9963_dicdi ame: full=probable serine threonine-protein kinase ddb_g0272254;GO:0010646=>regulation of cell communication=>y9963_dicdi…	PF07714=>Protein tyrosine kinase;	IPR011009 (Protein kinase-like domain)
RirG096500	7			IPR011009 (Protein kinase-like domain)
RirG173940	7	GO:0000075=>cell cycle checkpoint=>y9844_dicdi ame: full=probable serine threonine-protein kinase ddb_g0282963;GO:0000165=>MAPK cascade=>y9844_dicdi ame: full=probable serine threonine-protein kinase ddb_g0282963;GO:0000166=>nucleotide binding=>y9844_dicdi ame: full=probable serine threonine-protein kinase ddb_g0282963;GO:0001819=>positive regulation of cytokine production=>y9844_dicdi ame: full=…	PF00069=>Protein kinase domain;	IPR011009 (Protein kinase-like domain)
RirG095150	7	GO:0001819=>positive regulation of cytokine production=>y9844_dicdi ame: full=probable serine threonine-protein kinase ddb_g0282963;GO:0002224=>toll-like receptor signaling pathway=>y9844_dicdi ame: full=probable serine threonine-protein kinase ddb_g0282963;GO:0004674=>protein serine/threonine kinase activity=>y9844_dicdi ame: full=probable serine threonine-protein kinase ddb_g0282963;GO:0005488=…	PF07714=>Protein tyrosine kinase;	IPR011009 (Protein kinase-like domain)
RirG121150	7	GO:0000166=>nucleotide binding=>m3k7_rat ame: full=mitogen-activated protein kinase kinase kinase 7;GO:0001819=>positive regulation of cytokine production=>m3k7_rat ame: full=mitogen-activated protein kinase kinase kinase 7;GO:0002224=>toll-like receptor signaling pathway=>m3k7_rat ame: full=mitogen-activated protein kinase kinase kinase 7;GO:0004674=>protein serine/threonine kinase activity=>m3k…	PF07714=>Protein tyrosine kinase;	IPR011009 (Protein kinase-like domain)
RirG150810	7	GO:0004672=>protein kinase activity=>yr831_mimiv ame: full= serine threonine-protein kinase receptor r831 flags: precursor;GO:0005634=>nucleus=>yr831_mimiv ame: full= serine threonine-protein kinase receptor r831 flags: precursor;GO:0005737=>cytoplasm=>yr831_mimiv ame: full= serine threonine-protein kinase receptor r831 flags: precursor;GO:0016310=>phosphorylation=>yr831_mimiv ame: full= serine t…	PF00069=>Protein kinase domain;	IPR011009 (Protein kinase-like domain)
RirG129390	7	GO:0000165=>MAPK cascade=>y9957_dicdi ame: full=probable serine threonine-protein kinase ddb_g0276181;GO:0000186=>activation of MAPKK activity=>y9957_dicdi ame: full=probable serine threonine-protein kinase ddb_g0276181;GO:0001819=>positive regulation of cytokine production=>y9957_dicdi ame: full=probable serine threonine-protein kinase ddb_g0276181;GO:0002224=>toll-like receptor signaling pathwa…	PF00069=>Protein kinase domain;	IPR011009 (Protein kinase-like domain)
RirG122410	7	GO:0001819=>positive regulation of cytokine production=>y9956_dicdi ame: full=probable serine threonine-protein kinase ddb_g0268876;GO:0002224=>toll-like receptor signaling pathway=>y9956_dicdi ame: full=probable serine threonine-protein kinase ddb_g0268876;GO:0004674=>protein serine/threonine kinase activity=>y9956_dicdi ame: full=probable serine threonine-protein kinase ddb_g0268876;GO:0005829=…	PF07714=>Protein tyrosine kinase;	IPR011009 (Protein kinase-like domain)
RirG264070	7	GO:0000165=>MAPK cascade=>y9957_dicdi ame: full=probable serine threonine-protein kinase ddb_g0276181;GO:0000186=>activation of MAPKK activity=>y9957_dicdi ame: full=probable serine threonine-protein kinase ddb_g0276181;GO:0001819=>positive regulation of cytokine production=>y9957_dicdi ame: full=probable serine threonine-protein kinase ddb_g0276181;GO:0002224=>toll-like receptor signaling pathwa…	PF00069=>Protein kinase domain;	IPR011009 (Protein kinase-like domain)
RirG161930	7	GO:0000165=>MAPK cascade=>y9871_dicdi ame: full=probable serine threonine-protein kinase ddb_g0271682;GO:0000186=>activation of MAPKK activity=>y9871_dicdi ame: full=probable serine threonine-protein kinase ddb_g0271682;GO:0004709=>MAP kinase kinase kinase activity=>y9871_dicdi ame: full=probable serine threonine-protein kinase ddb_g0271682;GO:0007147=>female meiosis II=>y9871_dicdi ame: full=pro…	PF00069=>Protein kinase domain;	IPR011009 (Protein kinase-like domain; IPR015783 (Serine/threonine protein kinase-like, ATMRK)
RirG043940	7	GO:0004672=>protein kinase activity=>y9844_dicdi ame: full=probable serine threonine-protein kinase ddb_g0282963;GO:0005488=>binding=>y9844_dicdi ame: full=probable serine threonine-protein kinase ddb_g0282963;GO:0005622=>intracellular=>y9844_dicdi ame: full=probable serine threonine-protein kinase ddb_g0282963;GO:0006468=>protein phosphorylation=>y9844_dicdi ame: full=probable serine threonine-p…	PF07714=>Protein tyrosine kinase;	IPR011009 (Protein kinase-like domain)
RirG045630	7	GO:0002224=>toll-like receptor signaling pathway=>m3k7_rat ame: full=mitogen-activated protein kinase kinase kinase 7;GO:0004672=>protein kinase activity=>m3k7_rat ame: full=mitogen-activated protein kinase kinase kinase 7;GO:0005515=>protein binding=>m3k7_rat ame: full=mitogen-activated protein kinase kinase kinase 7;GO:0005737=>cytoplasm=>m3k7_rat ame: full=mitogen-activated protein kinase kina…	PF00069=>Protein kinase domain;	IPR011009 (Protein kinase-like domain)
RirG046840	7	GO:0002224=>toll-like receptor signaling pathway=>y9956_dicdi ame: full=probable serine threonine-protein kinase ddb_g0268876;GO:0004672=>protein kinase activity=>y9956_dicdi ame: full=probable serine threonine-protein kinase ddb_g0268876;GO:0005488=>binding=>y9956_dicdi ame: full=probable serine threonine-protein kinase ddb_g0268876;GO:0005737=>cytoplasm=>y9956_dicdi ame: full=probable serine th…	PF07714=>Protein tyrosine kinase;	IPR011009 (Protein kinase-like domain)
RirG044640	7	GO:0002224=>toll-like receptor signaling pathway=>y9963_dicdi ame: full=probable serine threonine-protein kinase ddb_g0272254;GO:0004672=>protein kinase activity=>y9963_dicdi ame: full=probable serine threonine-protein kinase ddb_g0272254;GO:0005515=>protein binding=>y9963_dicdi ame: full=probable serine threonine-protein kinase ddb_g0272254;GO:0005737=>cytoplasm=>y9963_dicdi ame: full=probable s…	PF00069=>Protein kinase domain;	IPR011009 (Protein kinase-like domain)
RirG051580	7	GO:0004674=>protein serine/threonine kinase activity=>y9963_dicdi ame: full=probable serine threonine-protein kinase ddb_g0272254;GO:0005515=>protein binding=>y9963_dicdi ame: full=probable serine threonine-protein kinase ddb_g0272254;GO:0006952=>defense response=>y9963_dicdi ame: full=probable serine threonine-protein kinase ddb_g0272254;GO:0006955=>immune response=>y9963_dicdi ame: full=probabl…	PF07714=>Protein tyrosine kinase;	IPR011009 (Protein kinase-like domain)
RirG046650	7	GO:0004674=>protein serine/threonine kinase activity=>y9844_dicdi ame: full=probable serine threonine-protein kinase ddb_g0282963;GO:0004714=>transmembrane receptor protein tyrosine kinase activity=>y9844_dicdi ame: full=probable serine threonine-protein kinase ddb_g0282963;GO:0005886=>plasma membrane=>y9844_dicdi ame: full=probable serine threonine-protein kinase ddb_g0282963;GO:0007049=>cell cy…	PF07714=>Protein tyrosine kinase;	IPR011009 (Protein kinase-like domain)
RirG047930	7	GO:0002009=>morphogenesis of an epithelium=>yr831_mimiv ame: full= serine threonine-protein kinase receptor r831 flags: precursor;GO:0002224=>toll-like receptor signaling pathway=>yr831_mimiv ame: full= serine threonine-protein kinase receptor r831 flags: precursor;GO:0002252=>immune effector process=>yr831_mimiv ame: full= serine threonine-protein kinase receptor r831 flags: precursor;GO:0004674…	PF07714=>Protein tyrosine kinase;	IPR011009 (Protein kinase-like domain)
RirG048930	7	GO:0002224=>toll-like receptor signaling pathway=>drkd_dicdi ame: full=probable serine threonine-protein kinase drkd ame: full=receptor-like kinase d;GO:0004674=>protein serine/threonine kinase activity=>drkd_dicdi ame: full=probable serine threonine-protein kinase drkd ame: full=receptor-like kinase d;GO:0005515=>protein binding=>drkd_dicdi ame: full=probable serine threonine-protein kinase drkd…	PF07714=>Protein tyrosine kinase;	IPR011009 (Protein kinase-like domain)
RirG078860	7		PF07714=>Protein tyrosine kinase;	IPR011009 (Protein kinase-like domain)
RirG029750	7	GO:0002224=>toll-like receptor signaling pathway=>y9963_dicdi ame: full=probable serine threonine-protein kinase ddb_g0272254;GO:0004672=>protein kinase activity=>y9963_dicdi ame: full=probable serine threonine-protein kinase ddb_g0272254;GO:0005488=>binding=>y9963_dicdi ame: full=probable serine threonine-protein kinase ddb_g0272254;GO:0006139=>nucleobase-containing compound metabolic process=>y…	PF07714=>Protein tyrosine kinase;	IPR011009 (Protein kinase-like domain)
RirG003390	7	GO:0002224=>toll-like receptor signaling pathway=>y1136_arath ame: full=g-type lectin s-receptor-like serine threonine-protein kinase at1g61360 flags: precursor;GO:0004672=>protein kinase activity=>y1136_arath ame: full=g-type lectin s-receptor-like serine threonine-protein kinase at1g61360 flags: precursor;GO:0005515=>protein binding=>y1136_arath ame: full=g-type lectin s-receptor-like serine th…	PF07714=>Protein tyrosine kinase;	IPR011009 (Protein kinase-like domain)
RirG016270	7	GO:0002224=>toll-like receptor signaling pathway=>y9844_dicdi ame: full=probable serine threonine-protein kinase ddb_g0282963;GO:0004672=>protein kinase activity=>y9844_dicdi ame: full=probable serine threonine-protein kinase ddb_g0282963;GO:0005488=>binding=>y9844_dicdi ame: full=probable serine threonine-protein kinase ddb_g0282963;GO:0009966=>regulation of signal transduction=>y9844_dicdi ame:…	PF07714=>Protein tyrosine kinase;	IPR011009 (Protein kinase-like domain)
RirG006310	7	GO:0001819=>positive regulation of cytokine production=>pats1_dicdi ame: full=probable serine threonine-protein kinase pats1 ame: full=protein associated with the transduction of signal 1;GO:0002224=>toll-like receptor signaling pathway=>pats1_dicdi ame: full=probable serine threonine-protein kinase pats1 ame: full=protein associated with the transduction of signal 1;GO:0004672=>protein kinase ac…	PF07714=>Protein tyrosine kinase;	IPR011009 (Protein kinase-like domain)
RirG025450	7	GO:0002224=>toll-like receptor signaling pathway=>roco4_dicdi ame: full=probable serine threonine-protein kinase roco4 ame: full=ras of complex proteins and c-terminal of roc 4;GO:0004672=>protein kinase activity=>roco4_dicdi ame: full=probable serine threonine-protein kinase roco4 ame: full=ras of complex proteins and c-terminal of roc 4;GO:0005488=>binding=>roco4_dicdi ame: full=probable serine…	PF07714=>Protein tyrosine kinase;	IPR011009 (Protein kinase-like domain)
RirG025460	7	GO:0001819=>positive regulation of cytokine production=>yr831_mimiv ame: full= serine threonine-protein kinase receptor r831 flags: precursor;GO:0002224=>toll-like receptor signaling pathway=>yr831_mimiv ame: full= serine threonine-protein kinase receptor r831 flags: precursor;GO:0004672=>protein kinase activity=>yr831_mimiv ame: full= serine threonine-protein kinase receptor r831 flags: precurso…	PF07714=>Protein tyrosine kinase;	IPR011009 (Protein kinase-like domain)
RirG025440	7	GO:0001819=>positive regulation of cytokine production=>phg2_dicdi ame: full=serine threonine-protein kinase phg2;GO:0002224=>toll-like receptor signaling pathway=>phg2_dicdi ame: full=serine threonine-protein kinase phg2;GO:0004713=>protein tyrosine kinase activity=>phg2_dicdi ame: full=serine threonine-protein kinase phg2;GO:0004888=>transmembrane signaling receptor activity=>phg2_dicdi ame: fu…	PF07714=>Protein tyrosine kinase;	IPR011009 (Protein kinase-like domain)
RirG035090	7	GO:0001819=>positive regulation of cytokine production=>gbpc_dicdi ame: full=cyclic gmp-binding protein c ame: full=ras guanine nucleotide exchange factor t ame: full= domain-containing protein t;GO:0002224=>toll-like receptor signaling pathway=>gbpc_dicdi ame: full=cyclic gmp-binding protein c ame: full=ras guanine nucleotide exchange factor t ame: full= domain-containing protein t;GO:0004674=>p…	PF07714=>Protein tyrosine kinase;	IPR011009 (Protein kinase-like domain)
RirG029680	7	GO:0001819=>positive regulation of cytokine production=>y9963_dicdi ame: full=probable serine threonine-protein kinase ddb_g0272254;GO:0002009=>morphogenesis of an epithelium=>y9963_dicdi ame: full=probable serine threonine-protein kinase ddb_g0272254;GO:0002224=>toll-like receptor signaling pathway=>y9963_dicdi ame: full=probable serine threonine-protein kinase ddb_g0272254;GO:0002252=>immune ef…	PF00069=>Protein kinase domain;	IPR011009 (Protein kinase-like domain)
RirG016680	7	GO:0002224=>toll-like receptor signaling pathway=>gdt4_dicdi ame: full=probable serine threonine-protein kinase gdt4 ame: full=growth-differentiation transition protein 4 flags: precursor;GO:0004674=>protein serine/threonine kinase activity=>gdt4_dicdi ame: full=probable serine threonine-protein kinase gdt4 ame: full=growth-differentiation transition protein 4 flags: precursor;GO:0007254=>JNK cas…	PF07714=>Protein tyrosine kinase;	IPR011009 (Protein kinase-like domain)
RirG032400	7	GO:0002224=>toll-like receptor signaling pathway=>y9963_dicdi ame: full=probable serine threonine-protein kinase ddb_g0272254;GO:0004672=>protein kinase activity=>y9963_dicdi ame: full=probable serine threonine-protein kinase ddb_g0272254;GO:0005488=>binding=>y9963_dicdi ame: full=probable serine threonine-protein kinase ddb_g0272254;GO:0005737=>cytoplasm=>y9963_dicdi ame: full=probable serine th…	PF07714=>Protein tyrosine kinase;	IPR009030 (Growth factor, receptor; IPR011009 (Protein kinase-like domain)
RirG079610	7	GO:0001660=>fever generation=>y1199_dicdi ame: full=probable serine threonine-protein kinase ddb_g0282895;GO:0005004=>GPI-linked ephrin receptor activity=>y1199_dicdi ame: full=probable serine threonine-protein kinase ddb_g0282895;GO:0005769=>early endosome=>y1199_dicdi ame: full=probable serine threonine-protein kinase ddb_g0282895;GO:0005791=>rough endoplasmic reticulum=>y1199_dicdi ame: full=p…	PF00069=>Protein kinase domain;	IPR011009 (Protein kinase-like domain)
RirG028690	7	GO:0001819=>positive regulation of cytokine production=>ripk1_human ame: full=receptor-interacting serine threonine-protein kinase 1 ame: full=cell death protein rip ame: full=receptor-interacting protein 1 short=rip-1 ame: full=serine threonine-protein kinase rip;GO:0002224=>toll-like receptor signaling pathway=>ripk1_human ame: full=receptor-interacting serine threonine-protein kinase 1 ame: fu…	PF07714=>Protein tyrosine kinase;	IPR011009 (Protein kinase-like domain)
RirG025760	7	GO:0005515=>protein binding=>yr831_mimiv ame: full= serine threonine-protein kinase receptor r831 flags: precursor;GO:0005737=>cytoplasm=>yr831_mimiv ame: full= serine threonine-protein kinase receptor r831 flags: precursor;GO:0007166=>cell surface receptor signaling pathway=>yr831_mimiv ame: full= serine threonine-protein kinase receptor r831 flags: precursor;GO:0009966=>regulation of signal tra…	PF00069=>Protein kinase domain;	IPR011009 (Protein kinase-like domain)
RirG022110	7	GO:0002224=>toll-like receptor signaling pathway=>yr831_mimiv ame: full= serine threonine-protein kinase receptor r831 flags: precursor;GO:0004672=>protein kinase activity=>yr831_mimiv ame: full= serine threonine-protein kinase receptor r831 flags: precursor;GO:0005488=>binding=>yr831_mimiv ame: full= serine threonine-protein kinase receptor r831 flags: precursor;GO:0005737=>cytoplasm=>yr831_mimi…	PF07714=>Protein tyrosine kinase;	IPR011009 (Protein kinase-like domain)
RirG020460	7	GO:0004672=>protein kinase activity=>y9963_dicdi ame: full=probable serine threonine-protein kinase ddb_g0272254;GO:0016020=>membrane=>y9963_dicdi ame: full=probable serine threonine-protein kinase ddb_g0272254;GO:0016310=>phosphorylation=>y9963_dicdi ame: full=probable serine threonine-protein kinase ddb_g0272254;GO:0044238=>primary metabolic process=>y9963_dicdi ame: full=probable serine threon…	PF00069=>Protein kinase domain;	IPR011009 (Protein kinase-like domain)
RirG107820	7	GO:0004672=>protein kinase activity=>ytyk2_dicdi ame: full=probable tyrosine-protein kinase ddb_g0283397;GO:0005515=>protein binding=>ytyk2_dicdi ame: full=probable tyrosine-protein kinase ddb_g0283397;GO:0006970=>response to osmotic stress=>ytyk2_dicdi ame: full=probable tyrosine-protein kinase ddb_g0283397;GO:0016310=>phosphorylation=>ytyk2_dicdi ame: full=probable tyrosine-protein kinase ddb_g…	PF00069=>Protein kinase domain;	IPR011009 (Protein kinase-like domain)
RirG049260	7	GO:0005488=>binding=>y9871_dicdi ame: full=probable serine threonine-protein kinase ddb_g0271682;GO:0006950=>response to stress=>y9871_dicdi ame: full=probable serine threonine-protein kinase ddb_g0271682;GO:0016020=>membrane=>y9871_dicdi ame: full=probable serine threonine-protein kinase ddb_g0271682;GO:0016772=>transferase activity, transferring phosphorus-containing groups=>y9871_dicdi ame: fu…	PF07714=>Protein tyrosine kinase;	IPR020685 (Tyrosine-protein kinase)
RirG007600	7	GO:0001819=>positive regulation of cytokine production=>y9963_dicdi ame: full=probable serine threonine-protein kinase ddb_g0272254;GO:0002224=>toll-like receptor signaling pathway=>y9963_dicdi ame: full=probable serine threonine-protein kinase ddb_g0272254;GO:0004674=>protein serine/threonine kinase activity=>y9963_dicdi ame: full=probable serine threonine-protein kinase ddb_g0272254;GO:0006355=…	PF07714=>Protein tyrosine kinase;	IPR011009 (Protein kinase-like domain)
RirG041470	7			IPR011009 (Protein kinase-like domain)
RirG022090	7			IPR011009 (Protein kinase-like domain)
RirG028720	7	GO:0002376=>immune system process=>yr831_mimiv ame: full= serine threonine-protein kinase receptor r831 flags: precursor;GO:0004674=>protein serine/threonine kinase activity=>yr831_mimiv ame: full= serine threonine-protein kinase receptor r831 flags: precursor;GO:0004713=>protein tyrosine kinase activity=>yr831_mimiv ame: full= serine threonine-protein kinase receptor r831 flags: precursor;GO:000…	PF07714=>Protein tyrosine kinase;	IPR011009 (Protein kinase-like domain)
RirG016790	7	GO:0004674=>protein serine/threonine kinase activity=>y9963_dicdi ame: full=probable serine threonine-protein kinase ddb_g0272254;GO:0005622=>intracellular=>y9963_dicdi ame: full=probable serine threonine-protein kinase ddb_g0272254;GO:0019899=>enzyme binding=>y9963_dicdi ame: full=probable serine threonine-protein kinase ddb_g0272254;GO:0032147=>activation of protein kinase activity=>y9963_dicdi…	PF07714=>Protein tyrosine kinase;	IPR011009 (Protein kinase-like domain)
RirG072750	7	GO:0002224=>toll-like receptor signaling pathway=>ripk1_mouse ame: full=receptor-interacting serine threonine-protein kinase 1 ame: full=cell death protein rip ame: full=receptor-interacting protein 1 short=rip-1 ame: full=serine threonine-protein kinase rip;GO:0004674=>protein serine/threonine kinase activity=>ripk1_mouse ame: full=receptor-interacting serine threonine-protein kinase 1 ame: full…	PF00069=>Protein kinase domain;	IPR011009 (Protein kinase-like domain)
RirG068800	7	GO:0000166=>nucleotide binding=>drkb_dicdi ame: full=probable serine threonine-protein kinase drkb ame: full=receptor-like kinase 2 ame: full=receptor-like kinase b ame: full=vesicle-associated receptor tyrosine kinase-like protein 2 flags: precursor;GO:0001819=>positive regulation of cytokine production=>drkb_dicdi ame: full=probable serine threonine-protein kinase drkb ame: full=receptor-like k…	PF07714=>Protein tyrosine kinase;	IPR011009 (Protein kinase-like domain)
RirG096490	7	GO:0000165=>MAPK cascade=>yr831_mimiv ame: full= serine threonine-protein kinase receptor r831 flags: precursor;GO:0000186=>activation of MAPKK activity=>yr831_mimiv ame: full= serine threonine-protein kinase receptor r831 flags: precursor;GO:0004709=>MAP kinase kinase kinase activity=>yr831_mimiv ame: full= serine threonine-protein kinase receptor r831 flags: precursor;GO:0005515=>protein bindin…	PF00069=>Protein kinase domain;	IPR011009 (Protein kinase-like domain)
RirG208480	7	GO:0001819=>positive regulation of cytokine production=>yr818_mimiv ame: full= serine threonine-protein kinase receptor r818 flags: precursor;GO:0002224=>toll-like receptor signaling pathway=>yr818_mimiv ame: full= serine threonine-protein kinase receptor r818 flags: precursor;GO:0004674=>protein serine/threonine kinase activity=>yr818_mimiv ame: full= serine threonine-protein kinase receptor r81…	PF00069=>Protein kinase domain;	IPR011009 (Protein kinase-like domain; IPR015783 (Serine/threonine protein kinase-like, ATMRK)
RirG018180	7	GO:0000186=>activation of MAPKK activity=>y9963_dicdi ame: full=probable serine threonine-protein kinase ddb_g0272254;GO:0001819=>positive regulation of cytokine production=>y9963_dicdi ame: full=probable serine threonine-protein kinase ddb_g0272254;GO:0002224=>toll-like receptor signaling pathway=>y9963_dicdi ame: full=probable serine threonine-protein kinase ddb_g0272254;GO:0004709=>MAP kinase …	PF07714=>Protein tyrosine kinase;	IPR011009 (Protein kinase-like domain)
RirG124370	7	GO:0002688=>regulation of leukocyte chemotaxis=>nek8_danre ame: full=serine threonine-protein kinase nek8 ame: full=never in mitosis a-related kinase 8 short= -related protein kinase 8;GO:0004674=>protein serine/threonine kinase activity=>nek8_danre ame: full=serine threonine-protein kinase nek8 ame: full=never in mitosis a-related kinase 8 short= -related protein kinase 8;GO:0004713=>protein tyr…	PF00069=>Protein kinase domain;	IPR011009 (Protein kinase-like domain)
RirG048430	7	GO:0000166=>nucleotide binding=>mos_astpe ame: full=serine threonine-protein kinase mos ame: full=oocyte maturation factor mos;GO:0000186=>activation of MAPKK activity=>mos_astpe ame: full=serine threonine-protein kinase mos ame: full=oocyte maturation factor mos;GO:0001819=>positive regulation of cytokine production=>mos_astpe ame: full=serine threonine-protein kinase mos ame: full=oocyte matura…	PF00069=>Protein kinase domain;	IPR011009 (Protein kinase-like domain)
RirG073260	7	GO:0000186=>activation of MAPKK activity=>yr818_mimiv ame: full= serine threonine-protein kinase receptor r818 flags: precursor;GO:0000187=>activation of MAPK activity=>yr818_mimiv ame: full= serine threonine-protein kinase receptor r818 flags: precursor;GO:0002726=>positive regulation of T cell cytokine production=>yr818_mimiv ame: full= serine threonine-protein kinase receptor r818 flags: precu…	PF00069=>Protein kinase domain;	IPR011009 (Protein kinase-like domain)
RirG209070	7	GO:0000165=>MAPK cascade=>gdt2_dicdi ame: full=probable serine threonine-protein kinase gdt2 ame: full=growth-differentiation transition protein 2 flags: precursor;GO:0001819=>positive regulation of cytokine production=>gdt2_dicdi ame: full=probable serine threonine-protein kinase gdt2 ame: full=growth-differentiation transition protein 2 flags: precursor;GO:0002224=>toll-like receptor signaling …	PF07714=>Protein tyrosine kinase;	IPR011009 (Protein kinase-like domain)
RirG006280	7	GO:0001819=>positive regulation of cytokine production=>limk_dicdi ame: full=probable lim domain-containing serine threonine-protein kinase ddb_g0287001;GO:0002224=>toll-like receptor signaling pathway=>limk_dicdi ame: full=probable lim domain-containing serine threonine-protein kinase ddb_g0287001;GO:0004672=>protein kinase activity=>limk_dicdi ame: full=probable lim domain-containing serine thr…	PF00069=>Protein kinase domain;	IPR011009 (Protein kinase-like domain)
RirG006320	7	GO:0000166=>nucleotide binding=>pyk3_dicdi ame: full=dual specificity protein kinase pyk3 ame: full=tyrosine-protein kinase 3;GO:0001819=>positive regulation of cytokine production=>pyk3_dicdi ame: full=dual specificity protein kinase pyk3 ame: full=tyrosine-protein kinase 3;GO:0002224=>toll-like receptor signaling pathway=>pyk3_dicdi ame: full=dual specificity protein kinase pyk3 ame: full=tyros…	PF00069=>Protein kinase domain;PF07714=>Protein tyrosine kinase;	IPR011009 (Protein kinase-like domain)
RirG128040	7	GO:0005003=>ephrin receptor activity=>yr818_mimiv ame: full= serine threonine-protein kinase receptor r818 flags: precursor;GO:0005515=>protein binding=>yr818_mimiv ame: full= serine threonine-protein kinase receptor r818 flags: precursor;GO:0005622=>intracellular=>yr818_mimiv ame: full= serine threonine-protein kinase receptor r818 flags: precursor;GO:0005886=>plasma membrane=>yr818_mimiv ame: f…	PF00069=>Protein kinase domain;	IPR011009 (Protein kinase-like domain)
RirG004440	7	GO:0000165=>MAPK cascade=>pats1_dicdi ame: full=probable serine threonine-protein kinase pats1 ame: full=protein associated with the transduction of signal 1;GO:0004672=>protein kinase activity=>pats1_dicdi ame: full=probable serine threonine-protein kinase pats1 ame: full=protein associated with the transduction of signal 1;GO:0005488=>binding=>pats1_dicdi ame: full=probable serine threonine-pro…	PF00069=>Protein kinase domain;	IPR011009 (Protein kinase-like domain)
RirG005630	7	GO:0001819=>positive regulation of cytokine production=>yr831_mimiv ame: full= serine threonine-protein kinase receptor r831 flags: precursor;GO:0002224=>toll-like receptor signaling pathway=>yr831_mimiv ame: full= serine threonine-protein kinase receptor r831 flags: precursor;GO:0004672=>protein kinase activity=>yr831_mimiv ame: full= serine threonine-protein kinase receptor r831 flags: precurso…	PF00069=>Protein kinase domain;	IPR011009 (Protein kinase-like domain)
RirG074080	8		PF02892=>BED zinc finger;PF08238=>Sel1 repeat;	IPR003656 (Zinc finger, BED-type predicted; IPR011990 (Tetratricopeptide-like helical)
RirG252450	8		PF02892=>BED zinc finger;PF08238=>Sel1 repeat;	IPR003656 (Zinc finger, BED-type predicted; IPR011990 (Tetratricopeptide-like helical)
RirG136320	8	GO:0009987=>cellular process=>ybeq_ecoli ame: full=uncharacterized protein;GO:0043231=>intracellular membrane-bounded organelle=>ybeq_ecoli ame: full=uncharacterized protein;GO:0044444=>cytoplasmic part=>ybeq_ecoli ame: full=uncharacterized protein);	PF02892=>BED zinc finger;PF08238=>Sel1 repeat;	IPR003656 (Zinc finger, BED-type predicted; IPR011990 (Tetratricopeptide-like helical)
RirG193420	8	GO:0009987=>cellular process=>ybeq_ecoli ame: full=uncharacterized protein;GO:0050896=>response to stimulus=>ybeq_ecoli ame: full=uncharacterized protein);	PF02892=>BED zinc finger;PF08238=>Sel1 repeat;	IPR003656 (Zinc finger, BED-type predicted; IPR011990 (Tetratricopeptide-like helical)
RirG180140	8		PF02892=>BED zinc finger;PF08238=>Sel1 repeat;	IPR003656 (Zinc finger, BED-type predicted; IPR011990 (Tetratricopeptide-like helical)
RirG202370	8	GO:0043231=>intracellular membrane-bounded organelle=>ybeq_ecoli ame: full=uncharacterized protein;GO:0044444=>cytoplasmic part=>ybeq_ecoli ame: full=uncharacterized protein);	PF02892=>BED zinc finger;PF08238=>Sel1 repeat;	IPR003656 (Zinc finger, BED-type predicted; IPR011990 (Tetratricopeptide-like helical)
RirG144720	8		PF02892=>BED zinc finger;PF08238=>Sel1 repeat;	IPR003656 (Zinc finger, BED-type predicted; IPR011990 (Tetratricopeptide-like helical)
RirG105830	8		PF02892=>BED zinc finger;PF08238=>Sel1 repeat;	IPR003656 (Zinc finger, BED-type predicted; IPR011990 (Tetratricopeptide-like helical)
RirG252380	8		PF08238=>Sel1 repeat;	IPR003656 (Zinc finger, BED-type predicted; IPR011990 (Tetratricopeptide-like helical)
RirG259050	8		PF02892=>BED zinc finger;PF08238=>Sel1 repeat;	IPR003656 (Zinc finger, BED-type predicted; IPR011990 (Tetratricopeptide-like helical)
RirG201890	8	GO:0009987=>cellular process=>ybeq_ecoli ame: full=uncharacterized protein);	PF00069=>Protein kinase domain;PF08238=>Sel1 repeat;	IPR011009 (Protein kinase-like domain; IPR011990 (Tetratricopeptide-like helical)
RirG138340	8		PF08238=>Sel1 repeat;	IPR011990 (Tetratricopeptide-like helical)
RirG114630	8		PF08238=>Sel1 repeat;	IPR011990 (Tetratricopeptide-like helical)
RirG114650	8		PF08238=>Sel1 repeat;	IPR011990 (Tetratricopeptide-like helical)
RirG175980	8	GO:0004672=>protein kinase activity=>ybeq_ecoli ame: full=uncharacterized protein;GO:0005515=>protein binding=>ybeq_ecoli ame: full=uncharacterized protein;GO:0006468=>protein phosphorylation=>ybeq_ecoli ame: full=uncharacterized protein;GO:0007165=>signal transduction=>ybeq_ecoli ame: full=uncharacterized protein;GO:0016020=>membrane=>ybeq_ecoli ame: full=uncharacterized protein;GO:0044444=>cyto…	PF07714=>Protein tyrosine kinase;PF08238=>Sel1 repeat;	IPR011009 (Protein kinase-like domain; IPR011990 (Tetratricopeptide-like helical)
RirG201800	8	GO:0009987=>cellular process=>ybeq_ecoli ame: full=uncharacterized protein;GO:0050896=>response to stimulus=>ybeq_ecoli ame: full=uncharacterized protein);	PF00069=>Protein kinase domain;PF08238=>Sel1 repeat;	IPR011009 (Protein kinase-like domain; IPR011990 (Tetratricopeptide-like helical)
RirG185270	8		PF08238=>Sel1 repeat;	IPR011990 (Tetratricopeptide-like helical)
RirG138540	8	GO:0009987=>cellular process=>se1l1_human ame: full=protein sel-1 homolog 1 ame: full=suppressor of lin-12-like protein 1 short=sel-1l flags: precursor;GO:0043231=>intracellular membrane-bounded organelle=>se1l1_human ame: full=protein sel-1 homolog 1 ame: full=suppressor of lin-12-like protein 1 short=sel-1l flags: precursor;GO:0044444=>cytoplasmic part=>se1l1_human ame: full=protein sel-1 homol…	PF08238=>Sel1 repeat;	IPR011990 (Tetratricopeptide-like helical)
RirG239550	8	GO:0009987=>cellular process=>ybeq_ecoli ame: full=uncharacterized protein;GO:0050896=>response to stimulus=>ybeq_ecoli ame: full=uncharacterized protein);	PF08238=>Sel1 repeat;	IPR011990 (Tetratricopeptide-like helical)
RirG109670	8	GO:0000165=>MAPK cascade=>ybeq_ecoli ame: full=uncharacterized protein;GO:0004672=>protein kinase activity=>ybeq_ecoli ame: full=uncharacterized protein;GO:0005515=>protein binding=>ybeq_ecoli ame: full=uncharacterized protein;GO:0005737=>cytoplasm=>ybeq_ecoli ame: full=uncharacterized protein;GO:0009967=>positive regulation of signal transduction=>ybeq_ecoli ame: full=uncharacterized protein;GO:…	PF07714=>Protein tyrosine kinase;PF08238=>Sel1 repeat;	IPR011009 (Protein kinase-like domain; IPR011990 (Tetratricopeptide-like helical)
RirG119030	8	GO:0005515=>protein binding=>ybeq_ecoli ame: full=uncharacterized protein;GO:0005622=>intracellular=>ybeq_ecoli ame: full=uncharacterized protein;GO:0010646=>regulation of cell communication=>ybeq_ecoli ame: full=uncharacterized protein;GO:0010942=>positive regulation of cell death=>ybeq_ecoli ame: full=uncharacterized protein;GO:0016020=>membrane=>ybeq_ecoli ame: full=uncharacterized protein;GO:…	PF07714=>Protein tyrosine kinase;PF08238=>Sel1 repeat;	IPR011009 (Protein kinase-like domain; IPR011990 (Tetratricopeptide-like helical)
RirG254040	8	GO:0004674=>protein serine/threonine kinase activity=>ybeq_ecoli ame: full=uncharacterized protein;GO:0006468=>protein phosphorylation=>ybeq_ecoli ame: full=uncharacterized protein;GO:0050794=>regulation of cellular process=>ybeq_ecoli ame: full=uncharacterized protein;GO:0051716=>cellular response to stimulus=>ybeq_ecoli ame: full=uncharacterized protein);	PF07714=>Protein tyrosine kinase;PF08238=>Sel1 repeat;	IPR011009 (Protein kinase-like domain; IPR011990 (Tetratricopeptide-like helical)
RirG161350	8	GO:0005515=>protein binding=>ybeq_ecoli ame: full=uncharacterized protein;GO:0005737=>cytoplasm=>ybeq_ecoli ame: full=uncharacterized protein;GO:0010942=>positive regulation of cell death=>ybeq_ecoli ame: full=uncharacterized protein;GO:0016310=>phosphorylation=>ybeq_ecoli ame: full=uncharacterized protein;GO:0016772=>transferase activity, transferring phosphorus-containing groups=>ybeq_ecoli ame…	PF07714=>Protein tyrosine kinase;PF08238=>Sel1 repeat;	IPR011009 (Protein kinase-like domain; IPR011990 (Tetratricopeptide-like helical)
RirG224530	8	GO:0005515=>protein binding=>ybeq_ecoli ame: full=uncharacterized protein;GO:0005737=>cytoplasm=>ybeq_ecoli ame: full=uncharacterized protein;GO:0010942=>positive regulation of cell death=>ybeq_ecoli ame: full=uncharacterized protein;GO:0016310=>phosphorylation=>ybeq_ecoli ame: full=uncharacterized protein;GO:0016772=>transferase activity, transferring phosphorus-containing groups=>ybeq_ecoli ame…	PF07714=>Protein tyrosine kinase;PF08238=>Sel1 repeat;	IPR011009 (Protein kinase-like domain; IPR011990 (Tetratricopeptide-like helical)
RirG265060	8	GO:0004674=>protein serine/threonine kinase activity=>ybeq_ecoli ame: full=uncharacterized protein;GO:0005488=>binding=>ybeq_ecoli ame: full=uncharacterized protein;GO:0005622=>intracellular=>ybeq_ecoli ame: full=uncharacterized protein;GO:0006468=>protein phosphorylation=>ybeq_ecoli ame: full=uncharacterized protein;GO:0007165=>signal transduction=>ybeq_ecoli ame: full=uncharacterized protein;GO…	PF07714=>Protein tyrosine kinase;PF08238=>Sel1 repeat;	IPR011009 (Protein kinase-like domain; IPR011990 (Tetratricopeptide-like helical)
RirG117830	8	GO:0001819=>positive regulation of cytokine production=>ybeq_ecoli ame: full=uncharacterized protein;GO:0002224=>toll-like receptor signaling pathway=>ybeq_ecoli ame: full=uncharacterized protein;GO:0004674=>protein serine/threonine kinase activity=>ybeq_ecoli ame: full=uncharacterized protein;GO:0005886=>plasma membrane=>ybeq_ecoli ame: full=uncharacterized protein;GO:0006355=>regulation of tran…	PF07714=>Protein tyrosine kinase;PF08238=>Sel1 repeat;	IPR011009 (Protein kinase-like domain; IPR011990 (Tetratricopeptide-like helical)
RirG233390	8	GO:0009987=>cellular process=>ybeq_ecoli ame: full=uncharacterized protein;GO:0050896=>response to stimulus=>ybeq_ecoli ame: full=uncharacterized protein);	PF07714=>Protein tyrosine kinase;PF08238=>Sel1 repeat;	IPR011009 (Protein kinase-like domain; IPR011990 (Tetratricopeptide-like helical)
RirG259330	8		PF07714=>Protein tyrosine kinase;PF08238=>Sel1 repeat;	IPR011009 (Protein kinase-like domain; IPR011990 (Tetratricopeptide-like helical)
RirG184060	8	GO:0009987=>cellular process=>ybeq_ecoli ame: full=uncharacterized protein;GO:0050896=>response to stimulus=>ybeq_ecoli ame: full=uncharacterized protein);	PF00069=>Protein kinase domain;PF08238=>Sel1 repeat;	IPR011009 (Protein kinase-like domain; IPR011990 (Tetratricopeptide-like helical)
RirG208380	8	GO:0009987=>cellular process=>ybeq_ecoli ame: full=uncharacterized protein;GO:0050896=>response to stimulus=>ybeq_ecoli ame: full=uncharacterized protein);	PF07714=>Protein tyrosine kinase;PF08238=>Sel1 repeat;	IPR011009 (Protein kinase-like domain; IPR011990 (Tetratricopeptide-like helical)
RirG179440	8	GO:0005515=>protein binding=>ybeq_ecoli ame: full=uncharacterized protein;GO:0005737=>cytoplasm=>ybeq_ecoli ame: full=uncharacterized protein;GO:0010942=>positive regulation of cell death=>ybeq_ecoli ame: full=uncharacterized protein;GO:0016310=>phosphorylation=>ybeq_ecoli ame: full=uncharacterized protein;GO:0016772=>transferase activity, transferring phosphorus-containing groups=>ybeq_ecoli ame…	PF07714=>Protein tyrosine kinase;PF08238=>Sel1 repeat;	IPR011009 (Protein kinase-like domain; IPR011990 (Tetratricopeptide-like helical)
RirG220390	8		PF07714=>Protein tyrosine kinase;PF08238=>Sel1 repeat;	IPR011009 (Protein kinase-like domain; IPR011990 (Tetratricopeptide-like helical)
RirG223580	8	GO:0009987=>cellular process=>ybeq_ecoli ame: full=uncharacterized protein;GO:0050896=>response to stimulus=>ybeq_ecoli ame: full=uncharacterized protein);	PF00069=>Protein kinase domain;PF08238=>Sel1 repeat;	IPR011009 (Protein kinase-like domain; IPR011990 (Tetratricopeptide-like helical)
RirG167690	8	GO:0004672=>protein kinase activity=>ybeq_ecoli ame: full=uncharacterized protein;GO:0005515=>protein binding=>ybeq_ecoli ame: full=uncharacterized protein;GO:0005737=>cytoplasm=>ybeq_ecoli ame: full=uncharacterized protein;GO:0006351=>transcription, DNA-dependent=>ybeq_ecoli ame: full=uncharacterized protein;GO:0006468=>protein phosphorylation=>ybeq_ecoli ame: full=uncharacterized protein;GO:001…	PF07714=>Protein tyrosine kinase;PF08238=>Sel1 repeat;	IPR011009 (Protein kinase-like domain; IPR011990 (Tetratricopeptide-like helical)
RirG160000	8	GO:0009987=>cellular process=>ybeq_ecoli ame: full=uncharacterized protein;GO:0050896=>response to stimulus=>ybeq_ecoli ame: full=uncharacterized protein);	PF07714=>Protein tyrosine kinase;PF08238=>Sel1 repeat;	IPR011009 (Protein kinase-like domain; IPR011990 (Tetratricopeptide-like helical)
RirG242350	8	GO:0009987=>cellular process=>ybeq_ecoli ame: full=uncharacterized protein;GO:0050896=>response to stimulus=>ybeq_ecoli ame: full=uncharacterized protein);	PF00069=>Protein kinase domain;PF08238=>Sel1 repeat;	IPR011009 (Protein kinase-like domain; IPR011990 (Tetratricopeptide-like helical)
RirG229290	8	GO:0009987=>cellular process=>ybeq_ecoli ame: full=uncharacterized protein;GO:0050896=>response to stimulus=>ybeq_ecoli ame: full=uncharacterized protein);	PF00069=>Protein kinase domain;PF08238=>Sel1 repeat;	IPR011009 (Protein kinase-like domain; IPR011990 (Tetratricopeptide-like helical)
RirG183410	8	GO:0004674=>protein serine/threonine kinase activity=>ybeq_ecoli ame: full=uncharacterized protein;GO:0005515=>protein binding=>ybeq_ecoli ame: full=uncharacterized protein;GO:0006355=>regulation of transcription, DNA-dependent=>ybeq_ecoli ame: full=uncharacterized protein;GO:0007254=>JNK cascade=>ybeq_ecoli ame: full=uncharacterized protein;GO:0010646=>regulation of cell communication=>ybeq_ecol…	PF07714=>Protein tyrosine kinase;PF08238=>Sel1 repeat;	IPR011009 (Protein kinase-like domain; IPR011990 (Tetratricopeptide-like helical)
RirG234970	8	GO:0009987=>cellular process=>ybeq_ecoli ame: full=uncharacterized protein;GO:0016740=>transferase activity=>ybeq_ecoli ame: full=uncharacterized protein);	PF07714=>Protein tyrosine kinase;PF08238=>Sel1 repeat;	IPR011009 (Protein kinase-like domain; IPR011990 (Tetratricopeptide-like helical)
RirG145590	8	GO:0009987=>cellular process=>ybeq_ecoli ame: full=uncharacterized protein;GO:0050896=>response to stimulus=>ybeq_ecoli ame: full=uncharacterized protein);	PF00069=>Protein kinase domain;PF08238=>Sel1 repeat;	IPR011009 (Protein kinase-like domain; IPR011990 (Tetratricopeptide-like helical)
RirG216510	8		PF07714=>Protein tyrosine kinase;PF08238=>Sel1 repeat;	IPR011009 (Protein kinase-like domain; IPR011990 (Tetratricopeptide-like helical)
RirG180930	8	GO:0000165=>MAPK cascade=>ybeq_ecoli ame: full=uncharacterized protein;GO:0004672=>protein kinase activity=>ybeq_ecoli ame: full=uncharacterized protein;GO:0005488=>binding=>ybeq_ecoli ame: full=uncharacterized protein;GO:0010627=>regulation of intracellular protein kinase cascade=>ybeq_ecoli ame: full=uncharacterized protein;GO:0032147=>activation of protein kinase activity=>ybeq_ecoli ame: full…	PF07714=>Protein tyrosine kinase;PF08238=>Sel1 repeat;	IPR011009 (Protein kinase-like domain; IPR011990 (Tetratricopeptide-like helical)
RirG128710	8	GO:0009987=>cellular process=>ybeq_ecoli ame: full=uncharacterized protein;GO:0050896=>response to stimulus=>ybeq_ecoli ame: full=uncharacterized protein);	PF00069=>Protein kinase domain;PF08238=>Sel1 repeat;	IPR011009 (Protein kinase-like domain; IPR011990 (Tetratricopeptide-like helical)
RirG202590	8		PF00069=>Protein kinase domain;PF08238=>Sel1 repeat;	IPR011009 (Protein kinase-like domain; IPR011990 (Tetratricopeptide-like helical)
RirG115310	8		PF07714=>Protein tyrosine kinase;PF08238=>Sel1 repeat;	IPR011009 (Protein kinase-like domain; IPR011990 (Tetratricopeptide-like helical)
RirG129660	8		PF00069=>Protein kinase domain;PF08238=>Sel1 repeat;	IPR011009 (Protein kinase-like domain; IPR011990 (Tetratricopeptide-like helical)
RirG229460	8		PF07714=>Protein tyrosine kinase;PF08238=>Sel1 repeat;	IPR011009 (Protein kinase-like domain; IPR011990 (Tetratricopeptide-like helical)
RirG254630	8	GO:0009987=>cellular process=>ybeq_ecoli ame: full=uncharacterized protein;GO:0050896=>response to stimulus=>ybeq_ecoli ame: full=uncharacterized protein);	PF07714=>Protein tyrosine kinase;PF08238=>Sel1 repeat;	IPR011009 (Protein kinase-like domain; IPR011990 (Tetratricopeptide-like helical)
RirG235400	8	GO:0009987=>cellular process=>ybeq_ecoli ame: full=uncharacterized protein;GO:0050896=>response to stimulus=>ybeq_ecoli ame: full=uncharacterized protein);	PF00069=>Protein kinase domain;PF08238=>Sel1 repeat;	IPR011009 (Protein kinase-like domain; IPR011990 (Tetratricopeptide-like helical)
RirG151500	8	GO:0009987=>cellular process=>ybeq_ecoli ame: full=uncharacterized protein;GO:0050896=>response to stimulus=>ybeq_ecoli ame: full=uncharacterized protein);	PF07714=>Protein tyrosine kinase;PF08238=>Sel1 repeat;	IPR011009 (Protein kinase-like domain; IPR011990 (Tetratricopeptide-like helical)
RirG241410	8		PF07714=>Protein tyrosine kinase;PF08238=>Sel1 repeat;	IPR011009 (Protein kinase-like domain; IPR011990 (Tetratricopeptide-like helical)
RirG236540	8	GO:0001819=>positive regulation of cytokine production=>ybeq_ecoli ame: full=uncharacterized protein;GO:0002224=>toll-like receptor signaling pathway=>ybeq_ecoli ame: full=uncharacterized protein;GO:0005515=>protein binding=>ybeq_ecoli ame: full=uncharacterized protein;GO:0006139=>nucleobase-containing compound metabolic process=>ybeq_ecoli ame: full=uncharacterized protein;GO:0006468=>protein ph…	PF07714=>Protein tyrosine kinase;PF08238=>Sel1 repeat;	IPR011009 (Protein kinase-like domain; IPR011990 (Tetratricopeptide-like helical)
RirG236800	8	GO:0009987=>cellular process=>ybeq_ecoli ame: full=uncharacterized protein;GO:0050896=>response to stimulus=>ybeq_ecoli ame: full=uncharacterized protein);	PF00069=>Protein kinase domain;PF08238=>Sel1 repeat;	IPR011009 (Protein kinase-like domain; IPR011990 (Tetratricopeptide-like helical)
RirG230430	8		PF07714=>Protein tyrosine kinase;PF08238=>Sel1 repeat;	IPR011009 (Protein kinase-like domain; IPR011990 (Tetratricopeptide-like helical)
RirG223330	8		PF08238=>Sel1 repeat;	IPR011990 (Tetratricopeptide-like helical)
RirG234840	8	GO:0004674=>protein serine/threonine kinase activity=>ybeq_ecoli ame: full=uncharacterized protein;GO:0005829=>cytosol=>ybeq_ecoli ame: full=uncharacterized protein;GO:0005886=>plasma membrane=>ybeq_ecoli ame: full=uncharacterized protein;GO:0007243=>intracellular protein kinase cascade=>ybeq_ecoli ame: full=uncharacterized protein;GO:0016572=>histone phosphorylation=>ybeq_ecoli ame: full=unchara…	PF00069=>Protein kinase domain;PF08238=>Sel1 repeat;	IPR011009 (Protein kinase-like domain; IPR011990 (Tetratricopeptide-like helical)
RirG149910	8		PF00069=>Protein kinase domain;PF08238=>Sel1 repeat;	IPR011009 (Protein kinase-like domain; IPR011990 (Tetratricopeptide-like helical)
RirG259010	8	GO:0009987=>cellular process=>ybeq_ecoli ame: full=uncharacterized protein;GO:0050896=>response to stimulus=>ybeq_ecoli ame: full=uncharacterized protein);	PF07714=>Protein tyrosine kinase;PF08238=>Sel1 repeat;	IPR011009 (Protein kinase-like domain; IPR011990 (Tetratricopeptide-like helical)
RirG241010	8		PF08238=>Sel1 repeat;	IPR011990 (Tetratricopeptide-like helical)
RirG235120	8	GO:0009987=>cellular process=>ybeq_ecoli ame: full=uncharacterized protein;GO:0050896=>response to stimulus=>ybeq_ecoli ame: full=uncharacterized protein);	PF08238=>Sel1 repeat;	IPR011990 (Tetratricopeptide-like helical)
RirG115450	8	GO:0009987=>cellular process=>ybeq_ecoli ame: full=uncharacterized protein;GO:0050896=>response to stimulus=>ybeq_ecoli ame: full=uncharacterized protein);	PF07714=>Protein tyrosine kinase;PF08238=>Sel1 repeat;	IPR011009 (Protein kinase-like domain; IPR011990 (Tetratricopeptide-like helical)
RirG235130	8	GO:0009987=>cellular process=>ybeq_ecoli ame: full=uncharacterized protein;GO:0042221=>response to chemical stimulus=>ybeq_ecoli ame: full=uncharacterized protein);	PF08238=>Sel1 repeat;	IPR011990 (Tetratricopeptide-like helical)
RirG201150	8		PF00069=>Protein kinase domain;PF08238=>Sel1 repeat;	IPR011009 (Protein kinase-like domain; IPR011990 (Tetratricopeptide-like helical)
RirG255380	8	GO:0009987=>cellular process=>ybeq_ecoli ame: full=uncharacterized protein;GO:0050896=>response to stimulus=>ybeq_ecoli ame: full=uncharacterized protein);	PF07714=>Protein tyrosine kinase;PF08238=>Sel1 repeat;	IPR011009 (Protein kinase-like domain; IPR011990 (Tetratricopeptide-like helical)
RirG265560	8	GO:0009987=>cellular process=>ybeq_ecoli ame: full=uncharacterized protein;GO:0050896=>response to stimulus=>ybeq_ecoli ame: full=uncharacterized protein);	PF07714=>Protein tyrosine kinase;PF08238=>Sel1 repeat;	IPR011009 (Protein kinase-like domain; IPR011990 (Tetratricopeptide-like helical)
RirG239660	8	GO:0009987=>cellular process=>ybeq_ecoli ame: full=uncharacterized protein;GO:0050896=>response to stimulus=>ybeq_ecoli ame: full=uncharacterized protein);	PF00069=>Protein kinase domain;PF08238=>Sel1 repeat;	IPR011009 (Protein kinase-like domain; IPR011990 (Tetratricopeptide-like helical)
RirG195930	8	GO:0009987=>cellular process=>ybeq_ecoli ame: full=uncharacterized protein;GO:0050896=>response to stimulus=>ybeq_ecoli ame: full=uncharacterized protein);	PF07714=>Protein tyrosine kinase;PF08238=>Sel1 repeat;	IPR011009 (Protein kinase-like domain; IPR011990 (Tetratricopeptide-like helical)
RirG254600	8	GO:0009987=>cellular process=>ybeq_ecoli ame: full=uncharacterized protein;GO:0050896=>response to stimulus=>ybeq_ecoli ame: full=uncharacterized protein);	PF07714=>Protein tyrosine kinase;PF08238=>Sel1 repeat;	IPR011009 (Protein kinase-like domain; IPR011990 (Tetratricopeptide-like helical)
RirG181260	8		PF08238=>Sel1 repeat;	IPR011990 (Tetratricopeptide-like helical)
RirG171370	8	GO:0009987=>cellular process=>ybeq_ecoli ame: full=uncharacterized protein;GO:0050896=>response to stimulus=>ybeq_ecoli ame: full=uncharacterized protein);	PF00069=>Protein kinase domain;PF08238=>Sel1 repeat;	IPR011009 (Protein kinase-like domain; IPR011990 (Tetratricopeptide-like helical)
RirG196000	8		PF08238=>Sel1 repeat;	IPR011990 (Tetratricopeptide-like helical)
RirG111500	8		PF08238=>Sel1 repeat;	IPR011990 (Tetratricopeptide-like helical)
RirG229280	8	GO:0009987=>cellular process=>ybeq_ecoli ame: full=uncharacterized protein;GO:0050896=>response to stimulus=>ybeq_ecoli ame: full=uncharacterized protein);	PF08238=>Sel1 repeat;	IPR011990 (Tetratricopeptide-like helical)
RirG202620	8		PF08238=>Sel1 repeat;	IPR011990 (Tetratricopeptide-like helical)
RirG190660	8		PF07714=>Protein tyrosine kinase;PF08238=>Sel1 repeat;	IPR011009 (Protein kinase-like domain; IPR011990 (Tetratricopeptide-like helical)
RirG121430	8	GO:0009987=>cellular process=>ybeq_ecoli ame: full=uncharacterized protein;GO:0050896=>response to stimulus=>ybeq_ecoli ame: full=uncharacterized protein);	PF00069=>Protein kinase domain;PF08238=>Sel1 repeat;	IPR011009 (Protein kinase-like domain; IPR011990 (Tetratricopeptide-like helical)
RirG198530	8		PF08238=>Sel1 repeat;	IPR011990 (Tetratricopeptide-like helical)
RirG229450	8		PF08238=>Sel1 repeat;	IPR011990 (Tetratricopeptide-like helical)
RirG204310	8	GO:0002224=>toll-like receptor signaling pathway=>ybeq_ecoli ame: full=uncharacterized protein;GO:0004674=>protein serine/threonine kinase activity=>ybeq_ecoli ame: full=uncharacterized protein;GO:0005515=>protein binding=>ybeq_ecoli ame: full=uncharacterized protein;GO:0006355=>regulation of transcription, DNA-dependent=>ybeq_ecoli ame: full=uncharacterized protein;GO:0007050=>cell cycle arrest=…	PF07714=>Protein tyrosine kinase;PF08238=>Sel1 repeat;	IPR011009 (Protein kinase-like domain; IPR011990 (Tetratricopeptide-like helical)
RirG236810	8		PF08238=>Sel1 repeat;	IPR011990 (Tetratricopeptide-like helical)
RirG194160	8		PF07714=>Protein tyrosine kinase;PF08238=>Sel1 repeat;	IPR011009 (Protein kinase-like domain; IPR011990 (Tetratricopeptide-like helical)
RirG120500	8	GO:0004674=>protein serine/threonine kinase activity=>y9955_dicdi ame: full=probable serine threonine-protein kinase ddb_g0267514;GO:0004713=>protein tyrosine kinase activity=>y9955_dicdi ame: full=probable serine threonine-protein kinase ddb_g0267514;GO:0004871=>signal transducer activity=>y9955_dicdi ame: full=probable serine threonine-protein kinase ddb_g0267514;GO:0006355=>regulation of trans…	PF07714=>Protein tyrosine kinase;PF08238=>Sel1 repeat;	IPR011009 (Protein kinase-like domain; IPR011990 (Tetratricopeptide-like helical)
RirG216310	8	GO:0009987=>cellular process=>ybeq_ecoli ame: full=uncharacterized protein;GO:0050896=>response to stimulus=>ybeq_ecoli ame: full=uncharacterized protein);	PF07714=>Protein tyrosine kinase;PF08238=>Sel1 repeat;	IPR011009 (Protein kinase-like domain; IPR011990 (Tetratricopeptide-like helical)
RirG269980	8		PF08238=>Sel1 repeat;	IPR011990 (Tetratricopeptide-like helical)
RirG188760	8		PF08238=>Sel1 repeat;	IPR011990 (Tetratricopeptide-like helical)
RirG121680	8	GO:0009987=>cellular process=>ybeq_ecoli ame: full=uncharacterized protein;GO:0050896=>response to stimulus=>ybeq_ecoli ame: full=uncharacterized protein);	PF08238=>Sel1 repeat;	IPR011990 (Tetratricopeptide-like helical)
RirG235390	8	GO:0009987=>cellular process=>ybeq_ecoli ame: full=uncharacterized protein;GO:0050896=>response to stimulus=>ybeq_ecoli ame: full=uncharacterized protein);	PF08238=>Sel1 repeat;	IPR011990 (Tetratricopeptide-like helical)
RirG241160	8	GO:0009987=>cellular process=>ybeq_ecoli ame: full=uncharacterized protein;GO:0050896=>response to stimulus=>ybeq_ecoli ame: full=uncharacterized protein);	PF00622=>SPRY domain;PF07714=>Protein tyrosine kinase;PF08238=>Sel1 repeat;	IPR001870 (B302/SPRY domain; IPR008985 (Concanavalin A-like lectin/glucanase; IPR011009 (Protein kinase-like domain; IPR011990 (Tetratricopeptide-like helical)
RirG144370	8	GO:0003824=>catalytic activity=>ybeq_ecoli ame: full=uncharacterized protein;GO:0009987=>cellular process=>ybeq_ecoli ame: full=uncharacterized protein);	PF00069=>Protein kinase domain;PF08238=>Sel1 repeat;	IPR011009 (Protein kinase-like domain; IPR011990 (Tetratricopeptide-like helical)
RirG273710	8	GO:0001819=>positive regulation of cytokine production=>ybeq_ecoli ame: full=uncharacterized protein;GO:0002224=>toll-like receptor signaling pathway=>ybeq_ecoli ame: full=uncharacterized protein;GO:0005515=>protein binding=>ybeq_ecoli ame: full=uncharacterized protein;GO:0006139=>nucleobase-containing compound metabolic process=>ybeq_ecoli ame: full=uncharacterized protein;GO:0006468=>protein ph…	PF07714=>Protein tyrosine kinase;PF08238=>Sel1 repeat;	IPR011009 (Protein kinase-like domain; IPR011990 (Tetratricopeptide-like helical)
RirG121670	8	GO:0009987=>cellular process=>ybeq_ecoli ame: full=uncharacterized protein;GO:0050896=>response to stimulus=>ybeq_ecoli ame: full=uncharacterized protein);	PF08238=>Sel1 repeat;	IPR011009 (Protein kinase-like domain; IPR011990 (Tetratricopeptide-like helical)
RirG120100	8	GO:0005737=>cytoplasm=>ybeq_ecoli ame: full=uncharacterized protein;GO:0009987=>cellular process=>ybeq_ecoli ame: full=uncharacterized protein);	PF08238=>Sel1 repeat;	IPR011990 (Tetratricopeptide-like helical)
RirG227300	8	GO:0006915=>apoptotic process=>ybeq_ecoli ame: full=uncharacterized protein;GO:0043231=>intracellular membrane-bounded organelle=>ybeq_ecoli ame: full=uncharacterized protein;GO:0044444=>cytoplasmic part=>ybeq_ecoli ame: full=uncharacterized protein;GO:0050789=>regulation of biological process=>ybeq_ecoli ame: full=uncharacterized protein);	PF08238=>Sel1 repeat;	IPR011990 (Tetratricopeptide-like helical)
RirG248540	8	GO:0004672=>protein kinase activity=>ybeq_ecoli ame: full=uncharacterized protein;GO:0005622=>intracellular=>ybeq_ecoli ame: full=uncharacterized protein;GO:0016020=>membrane=>ybeq_ecoli ame: full=uncharacterized protein;GO:0042221=>response to chemical stimulus=>ybeq_ecoli ame: full=uncharacterized protein;GO:0042803=>protein homodimerization activity=>ybeq_ecoli ame: full=uncharacterized protei…	PF07714=>Protein tyrosine kinase;PF08238=>Sel1 repeat;	IPR011009 (Protein kinase-like domain; IPR011990 (Tetratricopeptide-like helical)
RirG202580	8		PF08238=>Sel1 repeat;	IPR011990 (Tetratricopeptide-like helical)
RirG188770	8	GO:0009987=>cellular process=>ybeq_ecoli ame: full=uncharacterized protein;GO:0050896=>response to stimulus=>ybeq_ecoli ame: full=uncharacterized protein);	PF07714=>Protein tyrosine kinase;PF08238=>Sel1 repeat;	IPR011009 (Protein kinase-like domain; IPR011990 (Tetratricopeptide-like helical)
RirG254020	8		PF08238=>Sel1 repeat;	IPR011990 (Tetratricopeptide-like helical)
RirG221820	8	GO:0009987=>cellular process=>ybeq_ecoli ame: full=uncharacterized protein;GO:0050896=>response to stimulus=>ybeq_ecoli ame: full=uncharacterized protein);	PF08238=>Sel1 repeat;	IPR011990 (Tetratricopeptide-like helical)
RirG184880	8		PF00069=>Protein kinase domain;PF08238=>Sel1 repeat;	IPR011009 (Protein kinase-like domain; IPR011990 (Tetratricopeptide-like helical)
RirG169660	8		PF08238=>Sel1 repeat;	IPR011990 (Tetratricopeptide-like helical)
RirG173190	8		PF07714=>Protein tyrosine kinase;PF08238=>Sel1 repeat;	IPR011009 (Protein kinase-like domain; IPR011990 (Tetratricopeptide-like helical)
RirG115630	8	GO:0001819=>positive regulation of cytokine production=>ybeq_ecoli ame: full=uncharacterized protein;GO:0002224=>toll-like receptor signaling pathway=>ybeq_ecoli ame: full=uncharacterized protein;GO:0005515=>protein binding=>ybeq_ecoli ame: full=uncharacterized protein;GO:0006139=>nucleobase-containing compound metabolic process=>ybeq_ecoli ame: full=uncharacterized protein;GO:0006468=>protein ph…	PF07714=>Protein tyrosine kinase;PF08238=>Sel1 repeat;	IPR011009 (Protein kinase-like domain; IPR011990 (Tetratricopeptide-like helical)
RirG141860	8	GO:0009987=>cellular process=>ybeq_ecoli ame: full=uncharacterized protein;GO:0050896=>response to stimulus=>ybeq_ecoli ame: full=uncharacterized protein);	PF08238=>Sel1 repeat;	IPR011990 (Tetratricopeptide-like helical)
RirG128390	8	GO:0009987=>cellular process=>ybeq_ecoli ame: full=uncharacterized protein;GO:0050896=>response to stimulus=>ybeq_ecoli ame: full=uncharacterized protein);	PF00069=>Protein kinase domain;PF08238=>Sel1 repeat;	IPR011009 (Protein kinase-like domain; IPR011990 (Tetratricopeptide-like helical)
RirG185340	8		PF08238=>Sel1 repeat;	IPR011990 (Tetratricopeptide-like helical)
RirG145990	8		PF07714=>Protein tyrosine kinase;PF08238=>Sel1 repeat;	IPR011009 (Protein kinase-like domain; IPR011990 (Tetratricopeptide-like helical)
RirG204880	8		PF07714=>Protein tyrosine kinase;PF08238=>Sel1 repeat;	IPR011009 (Protein kinase-like domain; IPR011990 (Tetratricopeptide-like helical)
RirG168060	8	GO:0006915=>apoptotic process=>ybeq_ecoli ame: full=uncharacterized protein;GO:0043231=>intracellular membrane-bounded organelle=>ybeq_ecoli ame: full=uncharacterized protein;GO:0044444=>cytoplasmic part=>ybeq_ecoli ame: full=uncharacterized protein;GO:0050789=>regulation of biological process=>ybeq_ecoli ame: full=uncharacterized protein;GO:0050896=>response to stimulus=>ybeq_ecoli ame: full=unc…	PF08238=>Sel1 repeat;	IPR011990 (Tetratricopeptide-like helical)
RirG236530	8	GO:0009987=>cellular process=>ybeq_ecoli ame: full=uncharacterized protein;GO:0042221=>response to chemical stimulus=>ybeq_ecoli ame: full=uncharacterized protein);	PF08238=>Sel1 repeat;	IPR011990 (Tetratricopeptide-like helical)
RirG268500	8	GO:0000165=>MAPK cascade=>se1l1_human ame: full=protein sel-1 homolog 1 ame: full=suppressor of lin-12-like protein 1 short=sel-1l flags: precursor;GO:0004672=>protein kinase activity=>se1l1_human ame: full=protein sel-1 homolog 1 ame: full=suppressor of lin-12-like protein 1 short=sel-1l flags: precursor;GO:0005488=>binding=>se1l1_human ame: full=protein sel-1 homolog 1 ame: full=suppressor of l…	PF07714=>Protein tyrosine kinase;PF08238=>Sel1 repeat;	IPR011009 (Protein kinase-like domain; IPR011990 (Tetratricopeptide-like helical)
RirG248370	8	GO:0003824=>catalytic activity=>ybeq_ecoli ame: full=uncharacterized protein;GO:0009987=>cellular process=>ybeq_ecoli ame: full=uncharacterized protein);	PF07714=>Protein tyrosine kinase;PF08238=>Sel1 repeat;	IPR011009 (Protein kinase-like domain; IPR011990 (Tetratricopeptide-like helical)
RirG121890	8	GO:0005488=>binding=>se1l2_mouse ame: full=protein sel-1 homolog 2 ame: full=suppressor of lin-12-like protein 2 short=sel-1l2 flags: precursor;GO:0009987=>cellular process=>se1l2_mouse ame: full=protein sel-1 homolog 2 ame: full=suppressor of lin-12-like protein 2 short=sel-1l2 flags: precursor;GO:0016740=>transferase activity=>se1l2_mouse ame: full=protein sel-1 homolog 2 ame: full=suppressor o…	PF07714=>Protein tyrosine kinase;PF08238=>Sel1 repeat;	IPR011009 (Protein kinase-like domain; IPR011990 (Tetratricopeptide-like helical)
RirG113990	8	GO:0000166=>nucleotide binding=>ybeq_ecoli ame: full=uncharacterized protein;GO:0002009=>morphogenesis of an epithelium=>ybeq_ecoli ame: full=uncharacterized protein;GO:0002252=>immune effector process=>ybeq_ecoli ame: full=uncharacterized protein;GO:0004709=>MAP kinase kinase kinase activity=>ybeq_ecoli ame: full=uncharacterized protein;GO:0005737=>cytoplasm=>ybeq_ecoli ame: full=uncharacterized…	PF00069=>Protein kinase domain;PF08238=>Sel1 repeat;	IPR011009 (Protein kinase-like domain; IPR011990 (Tetratricopeptide-like helical)
RirG270420	8		PF08238=>Sel1 repeat;	IPR011990 (Tetratricopeptide-like helical)
RirG221280	8		PF08238=>Sel1 repeat;	IPR011990 (Tetratricopeptide-like helical)
RirG259110	8		PF07714=>Protein tyrosine kinase;PF08238=>Sel1 repeat;	IPR011009 (Protein kinase-like domain; IPR011990 (Tetratricopeptide-like helical)
RirG239900	8	GO:0009987=>cellular process=>ybeq_ecoli ame: full=uncharacterized protein;GO:0050896=>response to stimulus=>ybeq_ecoli ame: full=uncharacterized protein);	PF07714=>Protein tyrosine kinase;PF08238=>Sel1 repeat;	IPR011009 (Protein kinase-like domain; IPR011990 (Tetratricopeptide-like helical)
RirG216840	8	GO:0000165=>MAPK cascade=>ybeq_ecoli ame: full=uncharacterized protein;GO:0004672=>protein kinase activity=>ybeq_ecoli ame: full=uncharacterized protein;GO:0005488=>binding=>ybeq_ecoli ame: full=uncharacterized protein;GO:0010627=>regulation of intracellular protein kinase cascade=>ybeq_ecoli ame: full=uncharacterized protein;GO:0032147=>activation of protein kinase activity=>ybeq_ecoli ame: full…	PF07714=>Protein tyrosine kinase;PF08238=>Sel1 repeat;	IPR011009 (Protein kinase-like domain; IPR011990 (Tetratricopeptide-like helical)
RirG179050	8		PF08238=>Sel1 repeat;	IPR011990 (Tetratricopeptide-like helical)
RirG200090	8	GO:0004714=>transmembrane receptor protein tyrosine kinase activity=>se1l2_human ame: full=protein sel-1 homolog 2 ame: full=suppressor of lin-12-like protein 2 short=sel-1l2 flags: precursor;GO:0005488=>binding=>se1l2_human ame: full=protein sel-1 homolog 2 ame: full=suppressor of lin-12-like protein 2 short=sel-1l2 flags: precursor;GO:0005737=>cytoplasm=>se1l2_human ame: full=protein sel-1 homo…	PF07714=>Protein tyrosine kinase;PF08238=>Sel1 repeat;	IPR011009 (Protein kinase-like domain; IPR011990 (Tetratricopeptide-like helical)
RirG208410	8	GO:0000165=>MAPK cascade=>se1l2_mouse ame: full=protein sel-1 homolog 2 ame: full=suppressor of lin-12-like protein 2 short=sel-1l2 flags: precursor;GO:0004674=>protein serine/threonine kinase activity=>se1l2_mouse ame: full=protein sel-1 homolog 2 ame: full=suppressor of lin-12-like protein 2 short=sel-1l2 flags: precursor;GO:0006468=>protein phosphorylation=>se1l2_mouse ame: full=protein sel-1 …	PF07714=>Protein tyrosine kinase;PF08238=>Sel1 repeat;	IPR011009 (Protein kinase-like domain; IPR011990 (Tetratricopeptide-like helical)
RirG249850	8	GO:0005488=>binding=>ybeq_ecoli ame: full=uncharacterized protein;GO:0009987=>cellular process=>ybeq_ecoli ame: full=uncharacterized protein;GO:0016740=>transferase activity=>ybeq_ecoli ame: full=uncharacterized protein;GO:0050896=>response to stimulus=>ybeq_ecoli ame: full=uncharacterized protein);	PF00069=>Protein kinase domain;PF08238=>Sel1 repeat;	IPR011009 (Protein kinase-like domain; IPR011990 (Tetratricopeptide-like helical)
RirG110750	8		PF08238=>Sel1 repeat;	IPR011990 (Tetratricopeptide-like helical)
RirG152470	8		PF08238=>Sel1 repeat;	IPR011990 (Tetratricopeptide-like helical)
RirG201780	8		PF08238=>Sel1 repeat;	IPR011990 (Tetratricopeptide-like helical)
RirG171990	8	GO:0009987=>cellular process=>ybeq_ecoli ame: full=uncharacterized protein;GO:0050896=>response to stimulus=>ybeq_ecoli ame: full=uncharacterized protein);	PF08238=>Sel1 repeat;	IPR011990 (Tetratricopeptide-like helical)
RirG144360	8	GO:0009987=>cellular process=>ybeq_ecoli ame: full=uncharacterized protein;GO:0050896=>response to stimulus=>ybeq_ecoli ame: full=uncharacterized protein);	PF00069=>Protein kinase domain;PF08238=>Sel1 repeat;	IPR011009 (Protein kinase-like domain; IPR011990 (Tetratricopeptide-like helical)
RirG273720	8		PF08238=>Sel1 repeat;	IPR011990 (Tetratricopeptide-like helical)
RirG254180	8		PF07714=>Protein tyrosine kinase;PF08238=>Sel1 repeat;	IPR011009 (Protein kinase-like domain; IPR011990 (Tetratricopeptide-like helical)
RirG255070	8		PF08238=>Sel1 repeat;	IPR011990 (Tetratricopeptide-like helical)
RirG209910	8	GO:0009987=>cellular process=>ybeq_ecoli ame: full=uncharacterized protein;GO:0050896=>response to stimulus=>ybeq_ecoli ame: full=uncharacterized protein);	PF08238=>Sel1 repeat;	IPR011990 (Tetratricopeptide-like helical)
RirG161020	8	GO:0009987=>cellular process=>ybeq_ecoli ame: full=uncharacterized protein;GO:0016740=>transferase activity=>ybeq_ecoli ame: full=uncharacterized protein);	PF00069=>Protein kinase domain;PF08238=>Sel1 repeat;	IPR011009 (Protein kinase-like domain; IPR011990 (Tetratricopeptide-like helical)
RirG144960	8	GO:0009987=>cellular process=>ybeq_ecoli ame: full=uncharacterized protein;GO:0050896=>response to stimulus=>ybeq_ecoli ame: full=uncharacterized protein);	PF08238=>Sel1 repeat;	IPR011990 (Tetratricopeptide-like helical)
RirG172740	8	GO:0009987=>cellular process=>ybeq_ecoli ame: full=uncharacterized protein;GO:0050896=>response to stimulus=>ybeq_ecoli ame: full=uncharacterized protein);	PF08238=>Sel1 repeat;	IPR011990 (Tetratricopeptide-like helical)
RirG188560	8	GO:0009987=>cellular process=>ybeq_ecoli ame: full=uncharacterized protein;GO:0050896=>response to stimulus=>ybeq_ecoli ame: full=uncharacterized protein);	PF08238=>Sel1 repeat;	IPR011990 (Tetratricopeptide-like helical)
RirG254110	8		PF08238=>Sel1 repeat;	IPR011990 (Tetratricopeptide-like helical)
RirG151520	8		PF08238=>Sel1 repeat;	IPR011990 (Tetratricopeptide-like helical)
RirG193820	8		PF08238=>Sel1 repeat;	IPR011990 (Tetratricopeptide-like helical)
RirG252150	8	GO:0005739=>mitochondrion=>ybeq_ecoli ame: full=uncharacterized protein;GO:0009987=>cellular process=>ybeq_ecoli ame: full=uncharacterized protein);	PF08238=>Sel1 repeat;	IPR011990 (Tetratricopeptide-like helical)
RirG172090	8		PF08238=>Sel1 repeat;	IPR011990 (Tetratricopeptide-like helical)
RirG265100	8		PF08238=>Sel1 repeat;	IPR011990 (Tetratricopeptide-like helical)
RirG250340	8	GO:0005515=>protein binding=>ybeq_ecoli ame: full=uncharacterized protein;GO:0005739=>mitochondrion=>ybeq_ecoli ame: full=uncharacterized protein;GO:0043281=>regulation of cysteine-type endopeptidase activity involved in apoptotic process=>ybeq_ecoli ame: full=uncharacterized protein);	PF08238=>Sel1 repeat;	IPR011990 (Tetratricopeptide-like helical)
RirG171930	8	GO:0009987=>cellular process=>se1l1_human ame: full=protein sel-1 homolog 1 ame: full=suppressor of lin-12-like protein 1 short=sel-1l flags: precursor;GO:0043231=>intracellular membrane-bounded organelle=>se1l1_human ame: full=protein sel-1 homolog 1 ame: full=suppressor of lin-12-like protein 1 short=sel-1l flags: precursor;GO:0044444=>cytoplasmic part=>se1l1_human ame: full=protein sel-1 homol…	PF08238=>Sel1 repeat;	IPR011990 (Tetratricopeptide-like helical)
RirG227340	8	GO:0009987=>cellular process=>ybeq_ecoli ame: full=uncharacterized protein;GO:0043231=>intracellular membrane-bounded organelle=>ybeq_ecoli ame: full=uncharacterized protein;GO:0044444=>cytoplasmic part=>ybeq_ecoli ame: full=uncharacterized protein);	PF08238=>Sel1 repeat;	IPR011990 (Tetratricopeptide-like helical)
RirG189460	8		PF08238=>Sel1 repeat;	IPR011990 (Tetratricopeptide-like helical)
RirG223560	8	GO:0005737=>cytoplasm=>ybeq_ecoli ame: full=uncharacterized protein;GO:0008152=>metabolic process=>ybeq_ecoli ame: full=uncharacterized protein;GO:0009987=>cellular process=>ybeq_ecoli ame: full=uncharacterized protein;GO:0016740=>transferase activity=>ybeq_ecoli ame: full=uncharacterized protein;GO:0050896=>response to stimulus=>ybeq_ecoli ame: full=uncharacterized protein);	PF07714=>Protein tyrosine kinase;PF08238=>Sel1 repeat;	IPR011009 (Protein kinase-like domain; IPR011990 (Tetratricopeptide-like helical)
RirG254030	8		PF08238=>Sel1 repeat;	IPR011990 (Tetratricopeptide-like helical)
RirG236500	8	GO:0001819=>positive regulation of cytokine production=>se1l1_rat ame: full=protein sel-1 homolog 1 ame: full=suppressor of lin-12-like protein 1 short=sel-1l flags: precursor;GO:0002224=>toll-like receptor signaling pathway=>se1l1_rat ame: full=protein sel-1 homolog 1 ame: full=suppressor of lin-12-like protein 1 short=sel-1l flags: precursor;GO:0004672=>protein kinase activity=>se1l1_rat ame: f…	PF07714=>Protein tyrosine kinase;PF08238=>Sel1 repeat;	IPR011009 (Protein kinase-like domain; IPR011990 (Tetratricopeptide-like helical)
RirG265110	8	GO:0005515=>protein binding=>ybeq_ecoli ame: full=uncharacterized protein;GO:0005739=>mitochondrion=>ybeq_ecoli ame: full=uncharacterized protein;GO:0043281=>regulation of cysteine-type endopeptidase activity involved in apoptotic process=>ybeq_ecoli ame: full=uncharacterized protein);	PF08238=>Sel1 repeat;	IPR011990 (Tetratricopeptide-like helical)
RirG112330	8	GO:0009987=>cellular process=>se1l1_human ame: full=protein sel-1 homolog 1 ame: full=suppressor of lin-12-like protein 1 short=sel-1l flags: precursor;GO:0050896=>response to stimulus=>se1l1_human ame: full=protein sel-1 homolog 1 ame: full=suppressor of lin-12-like protein 1 short=sel-1l flags: precursor);	PF08238=>Sel1 repeat;	IPR011990 (Tetratricopeptide-like helical)
RirG141190	8		PF08238=>Sel1 repeat;	IPR011990 (Tetratricopeptide-like helical)
RirG256210	8	GO:0005515=>protein binding=>ybeq_ecoli ame: full=uncharacterized protein;GO:0006810=>transport=>ybeq_ecoli ame: full=uncharacterized protein;GO:0010033=>response to organic substance=>ybeq_ecoli ame: full=uncharacterized protein;GO:0010646=>regulation of cell communication=>ybeq_ecoli ame: full=uncharacterized protein;GO:0010942=>positive regulation of cell death=>ybeq_ecoli ame: full=uncharacte…	PF07714=>Protein tyrosine kinase;PF08238=>Sel1 repeat;	IPR011009 (Protein kinase-like domain; IPR011990 (Tetratricopeptide-like helical)
RirG112300	8		PF08238=>Sel1 repeat;	IPR011990 (Tetratricopeptide-like helical)
RirG199410	8	GO:0009987=>cellular process=>hcpe_helpy ame: full= beta-lactamase hcpe ame: full=cysteine-rich protein e flags: precursor);	PF08238=>Sel1 repeat;	IPR011990 (Tetratricopeptide-like helical)
RirG191070	8	GO:0009987=>cellular process=>se1l1_mouse ame: full=protein sel-1 homolog 1 ame: full=suppressor of lin-12-like protein 1 short=sel-1l flags: precursor;GO:0050896=>response to stimulus=>se1l1_mouse ame: full=protein sel-1 homolog 1 ame: full=suppressor of lin-12-like protein 1 short=sel-1l flags: precursor);	PF08238=>Sel1 repeat;	IPR011990 (Tetratricopeptide-like helical)
RirG193830	8		PF08238=>Sel1 repeat;	IPR011990 (Tetratricopeptide-like helical)
RirG176590	8	GO:0002376=>immune system process=>se1l1_human ame: full=protein sel-1 homolog 1 ame: full=suppressor of lin-12-like protein 1 short=sel-1l flags: precursor;GO:0004714=>transmembrane receptor protein tyrosine kinase activity=>se1l1_human ame: full=protein sel-1 homolog 1 ame: full=suppressor of lin-12-like protein 1 short=sel-1l flags: precursor;GO:0005488=>binding=>se1l1_human ame: full=protein …	PF07714=>Protein tyrosine kinase;PF08238=>Sel1 repeat;	IPR011009 (Protein kinase-like domain; IPR011990 (Tetratricopeptide-like helical)
RirG197100	8		PF08238=>Sel1 repeat;	IPR011990 (Tetratricopeptide-like helical)
RirG178230	8	GO:0009987=>cellular process=>ybeq_ecoli ame: full=uncharacterized protein;GO:0050896=>response to stimulus=>ybeq_ecoli ame: full=uncharacterized protein);	PF08238=>Sel1 repeat;	IPR011990 (Tetratricopeptide-like helical)
RirG157940	8	GO:0009987=>cellular process=>ybeq_ecoli ame: full=uncharacterized protein;GO:0050896=>response to stimulus=>ybeq_ecoli ame: full=uncharacterized protein);	PF00069=>Protein kinase domain;PF08238=>Sel1 repeat;	IPR011009 (Protein kinase-like domain; IPR011990 (Tetratricopeptide-like helical)
RirG248510	8	GO:0009987=>cellular process=>ybeq_ecoli ame: full=uncharacterized protein;GO:0043231=>intracellular membrane-bounded organelle=>ybeq_ecoli ame: full=uncharacterized protein;GO:0044444=>cytoplasmic part=>ybeq_ecoli ame: full=uncharacterized protein);	PF08238=>Sel1 repeat;	IPR011990 (Tetratricopeptide-like helical)
RirG155570	8	GO:0006915=>apoptotic process=>se1l1_human ame: full=protein sel-1 homolog 1 ame: full=suppressor of lin-12-like protein 1 short=sel-1l flags: precursor;GO:0043231=>intracellular membrane-bounded organelle=>se1l1_human ame: full=protein sel-1 homolog 1 ame: full=suppressor of lin-12-like protein 1 short=sel-1l flags: precursor;GO:0044444=>cytoplasmic part=>se1l1_human ame: full=protein sel-1 homo…	PF08238=>Sel1 repeat;	IPR011990 (Tetratricopeptide-like helical)
RirG117510	8	GO:0009987=>cellular process=>ybeq_ecoli ame: full=uncharacterized protein);	PF08238=>Sel1 repeat;	IPR011990 (Tetratricopeptide-like helical)
RirG189630	8	GO:0009987=>cellular process=>se1l1_human ame: full=protein sel-1 homolog 1 ame: full=suppressor of lin-12-like protein 1 short=sel-1l flags: precursor;GO:0050896=>response to stimulus=>se1l1_human ame: full=protein sel-1 homolog 1 ame: full=suppressor of lin-12-like protein 1 short=sel-1l flags: precursor);	PF08238=>Sel1 repeat;	IPR011990 (Tetratricopeptide-like helical)
RirG269970	8	GO:0004713=>protein tyrosine kinase activity=>ybeq_ecoli ame: full=uncharacterized protein;GO:0005515=>protein binding=>ybeq_ecoli ame: full=uncharacterized protein;GO:0006468=>protein phosphorylation=>ybeq_ecoli ame: full=uncharacterized protein;GO:0007166=>cell surface receptor signaling pathway=>ybeq_ecoli ame: full=uncharacterized protein;GO:0009966=>regulation of signal transduction=>ybeq_ec…	PF07714=>Protein tyrosine kinase;PF08238=>Sel1 repeat;	IPR011009 (Protein kinase-like domain; IPR011990 (Tetratricopeptide-like helical)
RirG165290	8	GO:0009987=>cellular process=>se1l1_mesau ame: full=protein sel-1 homolog 1 ame: full=suppressor of lin-12-like protein 1 short=sel-1l flags: precursor;GO:0043231=>intracellular membrane-bounded organelle=>se1l1_mesau ame: full=protein sel-1 homolog 1 ame: full=suppressor of lin-12-like protein 1 short=sel-1l flags: precursor;GO:0044444=>cytoplasmic part=>se1l1_mesau ame: full=protein sel-1 homol…	PF08238=>Sel1 repeat;	IPR011990 (Tetratricopeptide-like helical)
RirG115640	8	GO:0009987=>cellular process=>ybeq_ecoli ame: full=uncharacterized protein;GO:0050896=>response to stimulus=>ybeq_ecoli ame: full=uncharacterized protein);	PF08238=>Sel1 repeat;	IPR011990 (Tetratricopeptide-like helical)
RirG248480	8	GO:0004674=>protein serine/threonine kinase activity=>se1l1_human ame: full=protein sel-1 homolog 1 ame: full=suppressor of lin-12-like protein 1 short=sel-1l flags: precursor;GO:0005515=>protein binding=>se1l1_human ame: full=protein sel-1 homolog 1 ame: full=suppressor of lin-12-like protein 1 short=sel-1l flags: precursor;GO:0005938=>cell cortex=>se1l1_human ame: full=protein sel-1 homolog 1 a…	PF07714=>Protein tyrosine kinase;PF08238=>Sel1 repeat;	IPR011009 (Protein kinase-like domain; IPR011990 (Tetratricopeptide-like helical)
RirG016400	8		PF08238=>Sel1 repeat;	IPR011990 (Tetratricopeptide-like helical)
RirG081610	8		PF08238=>Sel1 repeat;	IPR011990 (Tetratricopeptide-like helical)
RirG173310	8		PF08238=>Sel1 repeat;	IPR011990 (Tetratricopeptide-like helical)
RirG205500	8		PF08238=>Sel1 repeat;	IPR011990 (Tetratricopeptide-like helical)
RirG205510	8	GO:0009987=>cellular process=>ybeq_ecoli ame: full=uncharacterized protein;GO:0050896=>response to stimulus=>ybeq_ecoli ame: full=uncharacterized protein);	PF08238=>Sel1 repeat;	IPR011990 (Tetratricopeptide-like helical)
RirG081620	8		PF08238=>Sel1 repeat;	IPR011990 (Tetratricopeptide-like helical)
RirG081630	8		PF08238=>Sel1 repeat;	IPR011990 (Tetratricopeptide-like helical)
RirG205530	8		PF08238=>Sel1 repeat;	IPR011990 (Tetratricopeptide-like helical)
RirG063760	8		PF08238=>Sel1 repeat;	IPR011990 (Tetratricopeptide-like helical)
RirG016410	8	GO:0006915=>apoptotic process=>ybeq_ecoli ame: full=uncharacterized protein;GO:0043231=>intracellular membrane-bounded organelle=>ybeq_ecoli ame: full=uncharacterized protein;GO:0044444=>cytoplasmic part=>ybeq_ecoli ame: full=uncharacterized protein;GO:0050789=>regulation of biological process=>ybeq_ecoli ame: full=uncharacterized protein);	PF08238=>Sel1 repeat;	IPR011990 (Tetratricopeptide-like helical)
RirG151540	8		PF08238=>Sel1 repeat;	IPR011990 (Tetratricopeptide-like helical)
RirG230460	8	GO:0009987=>cellular process=>ybeq_ecoli ame: full=uncharacterized protein;GO:0050896=>response to stimulus=>ybeq_ecoli ame: full=uncharacterized protein);	PF08238=>Sel1 repeat;	IPR011990 (Tetratricopeptide-like helical)
RirG201460	8	GO:0009987=>cellular process=>ybeq_ecoli ame: full=uncharacterized protein;GO:0050896=>response to stimulus=>ybeq_ecoli ame: full=uncharacterized protein);	PF08238=>Sel1 repeat;	IPR011990 (Tetratricopeptide-like helical)
RirG143170	8	GO:0009987=>cellular process=>ybeq_ecoli ame: full=uncharacterized protein;GO:0050896=>response to stimulus=>ybeq_ecoli ame: full=uncharacterized protein);	PF08238=>Sel1 repeat;	IPR011990 (Tetratricopeptide-like helical)
RirG201470	8		PF08238=>Sel1 repeat;	IPR011990 (Tetratricopeptide-like helical)
RirG198600	8		PF08238=>Sel1 repeat;	IPR011990 (Tetratricopeptide-like helical)
RirG124430	8	GO:0009987=>cellular process=>ybeq_ecoli ame: full=uncharacterized protein;GO:0050896=>response to stimulus=>ybeq_ecoli ame: full=uncharacterized protein);	PF08238=>Sel1 repeat;	IPR011990 (Tetratricopeptide-like helical)
RirG189670	8	GO:0009987=>cellular process=>ybeq_ecoli ame: full=uncharacterized protein;GO:0050896=>response to stimulus=>ybeq_ecoli ame: full=uncharacterized protein);	PF08238=>Sel1 repeat;	IPR011990 (Tetratricopeptide-like helical)
RirG098660	8	GO:0009987=>cellular process=>ybeq_ecoli ame: full=uncharacterized protein;GO:0043231=>intracellular membrane-bounded organelle=>ybeq_ecoli ame: full=uncharacterized protein;GO:0044444=>cytoplasmic part=>ybeq_ecoli ame: full=uncharacterized protein;GO:0050896=>response to stimulus=>ybeq_ecoli ame: full=uncharacterized protein);	PF08238=>Sel1 repeat;	IPR011990 (Tetratricopeptide-like helical)
RirG085140	8	GO:0009987=>cellular process=>ybeq_ecoli ame: full=uncharacterized protein;GO:0043231=>intracellular membrane-bounded organelle=>ybeq_ecoli ame: full=uncharacterized protein;GO:0044444=>cytoplasmic part=>ybeq_ecoli ame: full=uncharacterized protein;GO:0050896=>response to stimulus=>ybeq_ecoli ame: full=uncharacterized protein);	PF08238=>Sel1 repeat;	IPR011990 (Tetratricopeptide-like helical)
RirG196650	8	GO:0009987=>cellular process=>ybeq_ecoli ame: full=uncharacterized protein;GO:0043231=>intracellular membrane-bounded organelle=>ybeq_ecoli ame: full=uncharacterized protein;GO:0044444=>cytoplasmic part=>ybeq_ecoli ame: full=uncharacterized protein;GO:0050896=>response to stimulus=>ybeq_ecoli ame: full=uncharacterized protein);	PF08238=>Sel1 repeat;	IPR011990 (Tetratricopeptide-like helical)
RirG071720	8	GO:0006915=>apoptotic process=>ybeq_ecoli ame: full=uncharacterized protein;GO:0043231=>intracellular membrane-bounded organelle=>ybeq_ecoli ame: full=uncharacterized protein;GO:0044444=>cytoplasmic part=>ybeq_ecoli ame: full=uncharacterized protein;GO:0050789=>regulation of biological process=>ybeq_ecoli ame: full=uncharacterized protein;GO:0050896=>response to stimulus=>ybeq_ecoli ame: full=unc…	PF08238=>Sel1 repeat;	IPR011990 (Tetratricopeptide-like helical)
RirG254060	8		PF08238=>Sel1 repeat;	IPR011990 (Tetratricopeptide-like helical)
RirG264810	8		PF08238=>Sel1 repeat;	IPR011990 (Tetratricopeptide-like helical)
RirG198810	8	GO:0005739=>mitochondrion=>ybeq_ecoli ame: full=uncharacterized protein;GO:0006915=>apoptotic process=>ybeq_ecoli ame: full=uncharacterized protein;GO:0050789=>regulation of biological process=>ybeq_ecoli ame: full=uncharacterized protein);	PF08238=>Sel1 repeat;	IPR011990 (Tetratricopeptide-like helical)
RirG121910	8	GO:0005515=>protein binding=>ybeq_ecoli ame: full=uncharacterized protein;GO:0005739=>mitochondrion=>ybeq_ecoli ame: full=uncharacterized protein;GO:0043281=>regulation of cysteine-type endopeptidase activity involved in apoptotic process=>ybeq_ecoli ame: full=uncharacterized protein;GO:0050896=>response to stimulus=>ybeq_ecoli ame: full=uncharacterized protein);	PF08238=>Sel1 repeat;	IPR011990 (Tetratricopeptide-like helical)
RirG238990	8		PF08238=>Sel1 repeat;	IPR011990 (Tetratricopeptide-like helical)
RirG193840	8	GO:0002224=>toll-like receptor signaling pathway=>se1l2_human ame: full=protein sel-1 homolog 2 ame: full=suppressor of lin-12-like protein 2 short=sel-1l2 flags: precursor;GO:0004672=>protein kinase activity=>se1l2_human ame: full=protein sel-1 homolog 2 ame: full=suppressor of lin-12-like protein 2 short=sel-1l2 flags: precursor;GO:0004871=>signal transducer activity=>se1l2_human ame: full=prot…	PF07714=>Protein tyrosine kinase;PF08238=>Sel1 repeat;	IPR011009 (Protein kinase-like domain; IPR011990 (Tetratricopeptide-like helical)
RirG178220	8	GO:0009987=>cellular process=>ybeq_ecoli ame: full=uncharacterized protein;GO:0050896=>response to stimulus=>ybeq_ecoli ame: full=uncharacterized protein);	PF08238=>Sel1 repeat;	IPR011990 (Tetratricopeptide-like helical)
RirG168190	8		PF07714=>Protein tyrosine kinase;PF08238=>Sel1 repeat;	IPR011009 (Protein kinase-like domain; IPR011990 (Tetratricopeptide-like helical)
RirG145700	8	GO:0009987=>cellular process=>ybeq_ecoli ame: full=uncharacterized protein;GO:0050896=>response to stimulus=>ybeq_ecoli ame: full=uncharacterized protein);	PF07714=>Protein tyrosine kinase;PF08238=>Sel1 repeat;	IPR011009 (Protein kinase-like domain; IPR011990 (Tetratricopeptide-like helical)
RirG064370	8	GO:0009987=>cellular process=>ybeq_ecoli ame: full=uncharacterized protein);	PF08238=>Sel1 repeat;	IPR011990 (Tetratricopeptide-like helical)
RirG064430	8	GO:0009987=>cellular process=>ybeq_ecoli ame: full=uncharacterized protein);	PF08238=>Sel1 repeat;	IPR011990 (Tetratricopeptide-like helical)
RirG079830	8		PF08238=>Sel1 repeat;	IPR011990 (Tetratricopeptide-like helical)
RirG084390	8		PF08238=>Sel1 repeat;	IPR011990 (Tetratricopeptide-like helical)
RirG160680	8	GO:0005739=>mitochondrion=>se1l1_human ame: full=protein sel-1 homolog 1 ame: full=suppressor of lin-12-like protein 1 short=sel-1l flags: precursor;GO:0009987=>cellular process=>se1l1_human ame: full=protein sel-1 homolog 1 ame: full=suppressor of lin-12-like protein 1 short=sel-1l flags: precursor);	PF08238=>Sel1 repeat;	IPR011990 (Tetratricopeptide-like helical)
RirG099790	8	GO:0009987=>cellular process=>ybeq_ecoli ame: full=uncharacterized protein;GO:0042221=>response to chemical stimulus=>ybeq_ecoli ame: full=uncharacterized protein);	PF08238=>Sel1 repeat;	IPR011009 (Protein kinase-like domain; IPR011990 (Tetratricopeptide-like helical)
RirG109100	8	GO:0009987=>cellular process=>ybeq_ecoli ame: full=uncharacterized protein;GO:0042221=>response to chemical stimulus=>ybeq_ecoli ame: full=uncharacterized protein);	PF08238=>Sel1 repeat;	IPR011990 (Tetratricopeptide-like helical)
RirG100090	8	GO:0009987=>cellular process=>ybeq_ecoli ame: full=uncharacterized protein;GO:0050896=>response to stimulus=>ybeq_ecoli ame: full=uncharacterized protein);	PF00069=>Protein kinase domain;PF08238=>Sel1 repeat;	IPR011009 (Protein kinase-like domain; IPR011990 (Tetratricopeptide-like helical)
RirG107610	8		PF00069=>Protein kinase domain;PF08238=>Sel1 repeat;	IPR011009 (Protein kinase-like domain; IPR011990 (Tetratricopeptide-like helical)
RirG103390	8	GO:0009987=>cellular process=>ybeq_ecoli ame: full=uncharacterized protein;GO:0042221=>response to chemical stimulus=>ybeq_ecoli ame: full=uncharacterized protein);	PF07714=>Protein tyrosine kinase;PF08238=>Sel1 repeat;	IPR011009 (Protein kinase-like domain; IPR011990 (Tetratricopeptide-like helical)
RirG109570	8	GO:0000166=>nucleotide binding=>se1l1_rat ame: full=protein sel-1 homolog 1 ame: full=suppressor of lin-12-like protein 1 short=sel-1l flags: precursor;GO:0000186=>activation of MAPKK activity=>se1l1_rat ame: full=protein sel-1 homolog 1 ame: full=suppressor of lin-12-like protein 1 short=sel-1l flags: precursor;GO:0001819=>positive regulation of cytokine production=>se1l1_rat ame: full=protein s…	PF07714=>Protein tyrosine kinase;PF08238=>Sel1 repeat;	IPR011009 (Protein kinase-like domain; IPR011990 (Tetratricopeptide-like helical)
RirG105310	8	GO:0004672=>protein kinase activity=>ybeq_ecoli ame: full=uncharacterized protein;GO:0005488=>binding=>ybeq_ecoli ame: full=uncharacterized protein;GO:0005783=>endoplasmic reticulum=>ybeq_ecoli ame: full=uncharacterized protein;GO:0006468=>protein phosphorylation=>ybeq_ecoli ame: full=uncharacterized protein;GO:0007165=>signal transduction=>ybeq_ecoli ame: full=uncharacterized protein;GO:0009723=…	PF00069=>Protein kinase domain;PF08238=>Sel1 repeat;	IPR011009 (Protein kinase-like domain; IPR011990 (Tetratricopeptide-like helical)
RirG150330	8	GO:0004672=>protein kinase activity=>se1l2_human ame: full=protein sel-1 homolog 2 ame: full=suppressor of lin-12-like protein 2 short=sel-1l2 flags: precursor;GO:0005488=>binding=>se1l2_human ame: full=protein sel-1 homolog 2 ame: full=suppressor of lin-12-like protein 2 short=sel-1l2 flags: precursor;GO:0005783=>endoplasmic reticulum=>se1l2_human ame: full=protein sel-1 homolog 2 ame: full=supp…	PF07714=>Protein tyrosine kinase;PF08238=>Sel1 repeat;	IPR011009 (Protein kinase-like domain; IPR011990 (Tetratricopeptide-like helical)
RirG218550	8	GO:0001819=>positive regulation of cytokine production=>ybeq_ecoli ame: full=uncharacterized protein;GO:0002224=>toll-like receptor signaling pathway=>ybeq_ecoli ame: full=uncharacterized protein;GO:0004672=>protein kinase activity=>ybeq_ecoli ame: full=uncharacterized protein;GO:0005515=>protein binding=>ybeq_ecoli ame: full=uncharacterized protein;GO:0006139=>nucleobase-containing compound meta…	PF07714=>Protein tyrosine kinase;PF08238=>Sel1 repeat;	IPR011009 (Protein kinase-like domain; IPR011990 (Tetratricopeptide-like helical)
RirG108230	8	GO:0005515=>protein binding=>ybeq_ecoli ame: full=uncharacterized protein;GO:0007166=>cell surface receptor signaling pathway=>ybeq_ecoli ame: full=uncharacterized protein;GO:0009966=>regulation of signal transduction=>ybeq_ecoli ame: full=uncharacterized protein;GO:0010033=>response to organic substance=>ybeq_ecoli ame: full=uncharacterized protein;GO:0010646=>regulation of cell communication=>y…	PF00069=>Protein kinase domain;PF08238=>Sel1 repeat;	IPR011009 (Protein kinase-like domain; IPR011990 (Tetratricopeptide-like helical)
RirG103630	8	GO:0001819=>positive regulation of cytokine production=>ybeq_ecoli ame: full=uncharacterized protein;GO:0002224=>toll-like receptor signaling pathway=>ybeq_ecoli ame: full=uncharacterized protein;GO:0004674=>protein serine/threonine kinase activity=>ybeq_ecoli ame: full=uncharacterized protein;GO:0004871=>signal transducer activity=>ybeq_ecoli ame: full=uncharacterized protein;GO:0005515=>protein…	PF07714=>Protein tyrosine kinase;PF08238=>Sel1 repeat;	IPR011009 (Protein kinase-like domain; IPR011990 (Tetratricopeptide-like helical)
RirG126010	8	GO:0002009=>morphogenesis of an epithelium=>se1l2_mouse ame: full=protein sel-1 homolog 2 ame: full=suppressor of lin-12-like protein 2 short=sel-1l2 flags: precursor;GO:0002252=>immune effector process=>se1l2_mouse ame: full=protein sel-1 homolog 2 ame: full=suppressor of lin-12-like protein 2 short=sel-1l2 flags: precursor;GO:0004709=>MAP kinase kinase kinase activity=>se1l2_mouse ame: full=pro…	PF07714=>Protein tyrosine kinase;PF08238=>Sel1 repeat;	IPR011009 (Protein kinase-like domain; IPR011990 (Tetratricopeptide-like helical)
RirG176710	8	GO:0002440=>production of molecular mediator of immune response=>ybeq_ecoli ame: full=uncharacterized protein;GO:0002521=>leukocyte differentiation=>ybeq_ecoli ame: full=uncharacterized protein;GO:0003006=>developmental process involved in reproduction=>ybeq_ecoli ame: full=uncharacterized protein;GO:0004706=>JUN kinase kinase kinase activity=>ybeq_ecoli ame: full=uncharacterized protein;GO:00047…	PF00069=>Protein kinase domain;PF07714=>Protein tyrosine kinase;PF08238=>Sel1 repeat;	IPR011009 (Protein kinase-like domain; IPR011990 (Tetratricopeptide-like helical)
RirG105730	8	GO:0001819=>positive regulation of cytokine production=>ripk1_human ame: full=receptor-interacting serine threonine-protein kinase 1 ame: full=cell death protein rip ame: full=receptor-interacting protein 1 short=rip-1 ame: full=serine threonine-protein kinase rip;GO:0002224=>toll-like receptor signaling pathway=>ripk1_human ame: full=receptor-interacting serine threonine-protein kinase 1 ame: fu…	PF07714=>Protein tyrosine kinase;PF08238=>Sel1 repeat;	IPR011009 (Protein kinase-like domain; IPR011990 (Tetratricopeptide-like helical)
RirG100680	8	GO:0009987=>cellular process=>ybeq_ecoli ame: full=uncharacterized protein;GO:0042221=>response to chemical stimulus=>ybeq_ecoli ame: full=uncharacterized protein);	PF08238=>Sel1 repeat;	IPR011990 (Tetratricopeptide-like helical)
RirG109090	8	GO:0001819=>positive regulation of cytokine production=>ripk1_human ame: full=receptor-interacting serine threonine-protein kinase 1 ame: full=cell death protein rip ame: full=receptor-interacting protein 1 short=rip-1 ame: full=serine threonine-protein kinase rip;GO:0002009=>morphogenesis of an epithelium=>ripk1_human ame: full=receptor-interacting serine threonine-protein kinase 1 ame: full=cel…	PF00069=>Protein kinase domain;PF08238=>Sel1 repeat;	IPR011009 (Protein kinase-like domain; IPR011990 (Tetratricopeptide-like helical)
RirG140890	8	GO:0000003=>reproduction=>se1l2_mouse ame: full=protein sel-1 homolog 2 ame: full=suppressor of lin-12-like protein 2 short=sel-1l2 flags: precursor;GO:0002009=>morphogenesis of an epithelium=>se1l2_mouse ame: full=protein sel-1 homolog 2 ame: full=suppressor of lin-12-like protein 2 short=sel-1l2 flags: precursor;GO:0002224=>toll-like receptor signaling pathway=>se1l2_mouse ame: full=protein sel…	PF07714=>Protein tyrosine kinase;PF08238=>Sel1 repeat;	IPR011009 (Protein kinase-like domain; IPR011990 (Tetratricopeptide-like helical)
RirG109610	8		PF07714=>Protein tyrosine kinase;PF08238=>Sel1 repeat;	IPR011009 (Protein kinase-like domain; IPR011990 (Tetratricopeptide-like helical)
RirG223340	8	GO:0001819=>positive regulation of cytokine production=>ybeq_ecoli ame: full=uncharacterized protein;GO:0002224=>toll-like receptor signaling pathway=>ybeq_ecoli ame: full=uncharacterized protein;GO:0004674=>protein serine/threonine kinase activity=>ybeq_ecoli ame: full=uncharacterized protein;GO:0005515=>protein binding=>ybeq_ecoli ame: full=uncharacterized protein;GO:0006139=>nucleobase-contain…	PF07714=>Protein tyrosine kinase;PF08238=>Sel1 repeat;	IPR011009 (Protein kinase-like domain; IPR011990 (Tetratricopeptide-like helical)
RirG103170	8		PF08238=>Sel1 repeat;	IPR011990 (Tetratricopeptide-like helical)
RirG115440	8	GO:0004674=>protein serine/threonine kinase activity=>ybeq_ecoli ame: full=uncharacterized protein;GO:0006952=>defense response=>ybeq_ecoli ame: full=uncharacterized protein;GO:0006955=>immune response=>ybeq_ecoli ame: full=uncharacterized protein;GO:0007254=>JNK cascade=>ybeq_ecoli ame: full=uncharacterized protein;GO:0009617=>response to bacterium=>ybeq_ecoli ame: full=uncharacterized protein;G…	PF07714=>Protein tyrosine kinase;PF08238=>Sel1 repeat;	IPR011009 (Protein kinase-like domain; IPR011990 (Tetratricopeptide-like helical)
RirG020860	8		PF08238=>Sel1 repeat;	IPR011990 (Tetratricopeptide-like helical)
RirG044620	8		PF08238=>Sel1 repeat;	IPR011990 (Tetratricopeptide-like helical)
RirG043050	8	GO:0009987=>cellular process=>se1l1_human ame: full=protein sel-1 homolog 1 ame: full=suppressor of lin-12-like protein 1 short=sel-1l flags: precursor;GO:0050896=>response to stimulus=>se1l1_human ame: full=protein sel-1 homolog 1 ame: full=suppressor of lin-12-like protein 1 short=sel-1l flags: precursor);	PF08238=>Sel1 repeat;	IPR011990 (Tetratricopeptide-like helical)
RirG021270	8	GO:0009987=>cellular process=>ybeq_ecoli ame: full=uncharacterized protein;GO:0050896=>response to stimulus=>ybeq_ecoli ame: full=uncharacterized protein);	PF08238=>Sel1 repeat;	IPR011990 (Tetratricopeptide-like helical)
RirG071680	8	GO:0009987=>cellular process=>ybeq_ecoli ame: full=uncharacterized protein;GO:0043231=>intracellular membrane-bounded organelle=>ybeq_ecoli ame: full=uncharacterized protein;GO:0044444=>cytoplasmic part=>ybeq_ecoli ame: full=uncharacterized protein);	PF08238=>Sel1 repeat;	IPR011990 (Tetratricopeptide-like helical)
RirG032290	8		PF08238=>Sel1 repeat;	IPR011009 (Protein kinase-like domain; IPR011990 (Tetratricopeptide-like helical)
RirG025500	8	GO:0004674=>protein serine/threonine kinase activity=>se1l1_rat ame: full=protein sel-1 homolog 1 ame: full=suppressor of lin-12-like protein 1 short=sel-1l flags: precursor;GO:0006952=>defense response=>se1l1_rat ame: full=protein sel-1 homolog 1 ame: full=suppressor of lin-12-like protein 1 short=sel-1l flags: precursor;GO:0006955=>immune response=>se1l1_rat ame: full=protein sel-1 homolog 1 am…	PF07714=>Protein tyrosine kinase;PF08238=>Sel1 repeat;	IPR011009 (Protein kinase-like domain; IPR011990 (Tetratricopeptide-like helical)
RirG070970	8		PF07714=>Protein tyrosine kinase;PF08238=>Sel1 repeat;	IPR011009 (Protein kinase-like domain; IPR011990 (Tetratricopeptide-like helical)
RirG030560	8	GO:0009987=>cellular process=>ybeq_ecoli ame: full=uncharacterized protein;GO:0050896=>response to stimulus=>ybeq_ecoli ame: full=uncharacterized protein);	PF07714=>Protein tyrosine kinase;PF08238=>Sel1 repeat;	IPR011009 (Protein kinase-like domain; IPR011990 (Tetratricopeptide-like helical)
RirG028220	8	GO:0009987=>cellular process=>ybeq_ecoli ame: full=uncharacterized protein;GO:0050896=>response to stimulus=>ybeq_ecoli ame: full=uncharacterized protein);	PF07714=>Protein tyrosine kinase;PF08238=>Sel1 repeat;	IPR011009 (Protein kinase-like domain; IPR011990 (Tetratricopeptide-like helical)
RirG051500	8	GO:0006810=>transport=>ybeq_ecoli ame: full=uncharacterized protein;GO:0006952=>defense response=>ybeq_ecoli ame: full=uncharacterized protein;GO:0007165=>signal transduction=>ybeq_ecoli ame: full=uncharacterized protein;GO:0009617=>response to bacterium=>ybeq_ecoli ame: full=uncharacterized protein;GO:0010033=>response to organic substance=>ybeq_ecoli ame: full=uncharacterized protein;GO:0016020…	PF07714=>Protein tyrosine kinase;PF08238=>Sel1 repeat;	IPR011009 (Protein kinase-like domain; IPR011990 (Tetratricopeptide-like helical)
RirG085450	8	GO:0009987=>cellular process=>ybeq_ecoli ame: full=uncharacterized protein;GO:0050896=>response to stimulus=>ybeq_ecoli ame: full=uncharacterized protein);	PF00069=>Protein kinase domain;PF08238=>Sel1 repeat;	IPR011009 (Protein kinase-like domain; IPR011990 (Tetratricopeptide-like helical)
RirG045280	8		PF07714=>Protein tyrosine kinase;PF08238=>Sel1 repeat;	IPR011009 (Protein kinase-like domain; IPR011990 (Tetratricopeptide-like helical)
RirG026920	8	GO:0009987=>cellular process=>ybeq_ecoli ame: full=uncharacterized protein;GO:0050896=>response to stimulus=>ybeq_ecoli ame: full=uncharacterized protein);	PF07714=>Protein tyrosine kinase;PF08238=>Sel1 repeat;	IPR011009 (Protein kinase-like domain; IPR011990 (Tetratricopeptide-like helical)
RirG060790	8		PF08238=>Sel1 repeat;	IPR011990 (Tetratricopeptide-like helical)
RirG051620	8		PF07714=>Protein tyrosine kinase;PF08238=>Sel1 repeat;	IPR011009 (Protein kinase-like domain; IPR011990 (Tetratricopeptide-like helical)
RirG082270	8	GO:0009987=>cellular process=>ybeq_ecoli ame: full=uncharacterized protein;GO:0050896=>response to stimulus=>ybeq_ecoli ame: full=uncharacterized protein);	PF08238=>Sel1 repeat;	IPR011009 (Protein kinase-like domain; IPR011990 (Tetratricopeptide-like helical)
RirG097540	8		PF07714=>Protein tyrosine kinase;PF08238=>Sel1 repeat;	IPR011009 (Protein kinase-like domain; IPR011990 (Tetratricopeptide-like helical)
RirG103650	8	GO:0002224=>toll-like receptor signaling pathway=>ybeq_ecoli ame: full=uncharacterized protein;GO:0004672=>protein kinase activity=>ybeq_ecoli ame: full=uncharacterized protein;GO:0005488=>binding=>ybeq_ecoli ame: full=uncharacterized protein;GO:0006139=>nucleobase-containing compound metabolic process=>ybeq_ecoli ame: full=uncharacterized protein;GO:0007015=>actin filament organization=>ybeq_eco…	PF07714=>Protein tyrosine kinase;PF08238=>Sel1 repeat;	IPR011009 (Protein kinase-like domain; IPR011990 (Tetratricopeptide-like helical)
RirG085710	8	GO:0009987=>cellular process=>ybeq_ecoli ame: full=uncharacterized protein;GO:0050896=>response to stimulus=>ybeq_ecoli ame: full=uncharacterized protein);	PF00069=>Protein kinase domain;PF08238=>Sel1 repeat;	IPR011009 (Protein kinase-like domain; IPR011990 (Tetratricopeptide-like helical)
RirG077790	8		PF00069=>Protein kinase domain;PF08238=>Sel1 repeat;	IPR011009 (Protein kinase-like domain; IPR011990 (Tetratricopeptide-like helical)
RirG029220	8	GO:0009987=>cellular process=>ybeq_ecoli ame: full=uncharacterized protein;GO:0050896=>response to stimulus=>ybeq_ecoli ame: full=uncharacterized protein);	PF08238=>Sel1 repeat;	IPR011990 (Tetratricopeptide-like helical)
RirG060760	8		PF08238=>Sel1 repeat;	IPR003656 (Zinc finger, BED-type predicted; IPR011990 (Tetratricopeptide-like helical)
RirG152350	8	GO:0005886=>plasma membrane=>ybeq_ecoli ame: full=uncharacterized protein;GO:0006810=>transport=>ybeq_ecoli ame: full=uncharacterized protein;GO:0006952=>defense response=>ybeq_ecoli ame: full=uncharacterized protein;GO:0007165=>signal transduction=>ybeq_ecoli ame: full=uncharacterized protein;GO:0009311=>oligosaccharide metabolic process=>ybeq_ecoli ame: full=uncharacterized protein;GO:0009725=>…	PF00069=>Protein kinase domain;PF08238=>Sel1 repeat;	IPR011009 (Protein kinase-like domain; IPR011990 (Tetratricopeptide-like helical)
RirG072910	8		PF07714=>Protein tyrosine kinase;PF08238=>Sel1 repeat;	IPR011009 (Protein kinase-like domain; IPR011990 (Tetratricopeptide-like helical)
RirG270880	8	GO:0002224=>toll-like receptor signaling pathway=>y9963_dicdi ame: full=probable serine threonine-protein kinase ddb_g0272254;GO:0004672=>protein kinase activity=>y9963_dicdi ame: full=probable serine threonine-protein kinase ddb_g0272254;GO:0005515=>protein binding=>y9963_dicdi ame: full=probable serine threonine-protein kinase ddb_g0272254;GO:0005737=>cytoplasm=>y9963_dicdi ame: full=probable s…	PF07714=>Protein tyrosine kinase;	IPR011009 (Protein kinase-like domain)
RirG254620	8	GO:0009987=>cellular process=>ybeq_ecoli ame: full=uncharacterized protein;GO:0050896=>response to stimulus=>ybeq_ecoli ame: full=uncharacterized protein);	PF08238=>Sel1 repeat;	IPR011990 (Tetratricopeptide-like helical)
RirG010430	8	GO:0005739=>mitochondrion=>ybeq_ecoli ame: full=uncharacterized protein;GO:0006915=>apoptotic process=>ybeq_ecoli ame: full=uncharacterized protein;GO:0008152=>metabolic process=>ybeq_ecoli ame: full=uncharacterized protein;GO:0042221=>response to chemical stimulus=>ybeq_ecoli ame: full=uncharacterized protein);	PF08238=>Sel1 repeat;	IPR011990 (Tetratricopeptide-like helical)
RirG029400	8	GO:0005515=>protein binding=>ybeq_ecoli ame: full=uncharacterized protein;GO:0009987=>cellular process=>ybeq_ecoli ame: full=uncharacterized protein;GO:0042221=>response to chemical stimulus=>ybeq_ecoli ame: full=uncharacterized protein);	PF08238=>Sel1 repeat;	IPR011990 (Tetratricopeptide-like helical)
RirG204990	8	GO:0009987=>cellular process=>ybeq_ecoli ame: full=uncharacterized protein;GO:0043231=>intracellular membrane-bounded organelle=>ybeq_ecoli ame: full=uncharacterized protein;GO:0044444=>cytoplasmic part=>ybeq_ecoli ame: full=uncharacterized protein;GO:0050896=>response to stimulus=>ybeq_ecoli ame: full=uncharacterized protein);	PF08238=>Sel1 repeat;	IPR011990 (Tetratricopeptide-like helical)
RirG058690	8	GO:0005515=>protein binding=>ybeq_ecoli ame: full=uncharacterized protein;GO:0009987=>cellular process=>ybeq_ecoli ame: full=uncharacterized protein;GO:0050896=>response to stimulus=>ybeq_ecoli ame: full=uncharacterized protein);	PF08238=>Sel1 repeat;	IPR011990 (Tetratricopeptide-like helical)
RirG235160	8	GO:0009987=>cellular process=>ybeq_ecoli ame: full=uncharacterized protein;GO:0043231=>intracellular membrane-bounded organelle=>ybeq_ecoli ame: full=uncharacterized protein;GO:0044444=>cytoplasmic part=>ybeq_ecoli ame: full=uncharacterized protein;GO:0050896=>response to stimulus=>ybeq_ecoli ame: full=uncharacterized protein);	PF08238=>Sel1 repeat;	IPR011990 (Tetratricopeptide-like helical)
RirG226110	8		PF08238=>Sel1 repeat;	IPR011990 (Tetratricopeptide-like helical)
RirG273690	8	GO:0009987=>cellular process=>ybeq_ecoli ame: full=uncharacterized protein;GO:0042221=>response to chemical stimulus=>ybeq_ecoli ame: full=uncharacterized protein);	PF08238=>Sel1 repeat;	IPR011990 (Tetratricopeptide-like helical)
RirG109660	8	GO:0009987=>cellular process=>ybeq_ecoli ame: full=uncharacterized protein;GO:0042221=>response to chemical stimulus=>ybeq_ecoli ame: full=uncharacterized protein);	PF08238=>Sel1 repeat;	IPR011990 (Tetratricopeptide-like helical)
RirG083480	8	GO:0009987=>cellular process=>ybeq_ecoli ame: full=uncharacterized protein;GO:0042221=>response to chemical stimulus=>ybeq_ecoli ame: full=uncharacterized protein);	PF08238=>Sel1 repeat;	IPR011990 (Tetratricopeptide-like helical)
RirG051470	8		PF08238=>Sel1 repeat;	IPR011009 (Protein kinase-like domain; IPR011990 (Tetratricopeptide-like helical)
RirG088340	8	GO:0009987=>cellular process=>ybeq_ecoli ame: full=uncharacterized protein;GO:0050896=>response to stimulus=>ybeq_ecoli ame: full=uncharacterized protein);	PF08238=>Sel1 repeat;	IPR011990 (Tetratricopeptide-like helical)
RirG086350	8	GO:0009987=>cellular process=>ybeq_ecoli ame: full=uncharacterized protein;GO:0042221=>response to chemical stimulus=>ybeq_ecoli ame: full=uncharacterized protein);	PF08238=>Sel1 repeat;	IPR011990 (Tetratricopeptide-like helical)
RirG099490	8		PF08238=>Sel1 repeat;	IPR003656 (Zinc finger, BED-type predicted; IPR011990 (Tetratricopeptide-like helical)
RirG056690	8		PF08238=>Sel1 repeat;	IPR011990 (Tetratricopeptide-like helical)
RirG058130	8		PF08238=>Sel1 repeat;	IPR011990 (Tetratricopeptide-like helical)
RirG060770	8		PF02892=>BED zinc finger;PF08238=>Sel1 repeat;	IPR003656 (Zinc finger, BED-type predicted; IPR011990 (Tetratricopeptide-like helical)
RirG073850	8		PF02892=>BED zinc finger;PF08238=>Sel1 repeat;	IPR003656 (Zinc finger, BED-type predicted; IPR011990 (Tetratricopeptide-like helical)
RirG000500	8	GO:0005515=>protein binding=>ybeq_ecoli ame: full=uncharacterized protein;GO:0005737=>cytoplasm=>ybeq_ecoli ame: full=uncharacterized protein;GO:0010942=>positive regulation of cell death=>ybeq_ecoli ame: full=uncharacterized protein;GO:0016310=>phosphorylation=>ybeq_ecoli ame: full=uncharacterized protein;GO:0016772=>transferase activity, transferring phosphorus-containing groups=>ybeq_ecoli ame…	PF07714=>Protein tyrosine kinase;PF08238=>Sel1 repeat;	IPR011009 (Protein kinase-like domain; IPR011990 (Tetratricopeptide-like helical)
RirG004320	8	GO:0009987=>cellular process=>ybeq_ecoli ame: full=uncharacterized protein;GO:0050896=>response to stimulus=>ybeq_ecoli ame: full=uncharacterized protein);	PF07714=>Protein tyrosine kinase;PF08238=>Sel1 repeat;	IPR011009 (Protein kinase-like domain; IPR011990 (Tetratricopeptide-like helical)
RirG030120	8	GO:0005488=>binding=>ybeq_ecoli ame: full=uncharacterized protein;GO:0009987=>cellular process=>ybeq_ecoli ame: full=uncharacterized protein;GO:0016740=>transferase activity=>ybeq_ecoli ame: full=uncharacterized protein);	PF07714=>Protein tyrosine kinase;PF08238=>Sel1 repeat;	IPR011009 (Protein kinase-like domain; IPR011990 (Tetratricopeptide-like helical)
RirG002070	8		PF00069=>Protein kinase domain;PF08238=>Sel1 repeat;	IPR011009 (Protein kinase-like domain; IPR011990 (Tetratricopeptide-like helical)
RirG014770	8	GO:0009987=>cellular process=>ybeq_ecoli ame: full=uncharacterized protein;GO:0050896=>response to stimulus=>ybeq_ecoli ame: full=uncharacterized protein);	PF08238=>Sel1 repeat;	IPR011990 (Tetratricopeptide-like helical)
RirG070560	8	GO:0001819=>positive regulation of cytokine production=>ybeq_ecoli ame: full=uncharacterized protein;GO:0002224=>toll-like receptor signaling pathway=>ybeq_ecoli ame: full=uncharacterized protein;GO:0004672=>protein kinase activity=>ybeq_ecoli ame: full=uncharacterized protein;GO:0005515=>protein binding=>ybeq_ecoli ame: full=uncharacterized protein;GO:0006355=>regulation of transcription, DNA-de…	PF00069=>Protein kinase domain;PF08238=>Sel1 repeat;	IPR011009 (Protein kinase-like domain; IPR011990 (Tetratricopeptide-like helical)
RirG003570	8	GO:0006915=>apoptotic process=>ybeq_ecoli ame: full=uncharacterized protein;GO:0043231=>intracellular membrane-bounded organelle=>ybeq_ecoli ame: full=uncharacterized protein;GO:0044444=>cytoplasmic part=>ybeq_ecoli ame: full=uncharacterized protein;GO:0050789=>regulation of biological process=>ybeq_ecoli ame: full=uncharacterized protein);	PF08238=>Sel1 repeat;	IPR011990 (Tetratricopeptide-like helical)
RirG083240	8	GO:0005515=>protein binding=>ybeq_ecoli ame: full=uncharacterized protein;GO:0007166=>cell surface receptor signaling pathway=>ybeq_ecoli ame: full=uncharacterized protein;GO:0010033=>response to organic substance=>ybeq_ecoli ame: full=uncharacterized protein;GO:0010646=>regulation of cell communication=>ybeq_ecoli ame: full=uncharacterized protein;GO:0016043=>cellular component organization=>ybe…	PF00069=>Protein kinase domain;PF08238=>Sel1 repeat;	IPR011009 (Protein kinase-like domain; IPR011990 (Tetratricopeptide-like helical)
RirG050870	8		PF07714=>Protein tyrosine kinase;PF08238=>Sel1 repeat;	IPR011009 (Protein kinase-like domain; IPR011990 (Tetratricopeptide-like helical)
RirG109640	8		PF07714=>Protein tyrosine kinase;PF08238=>Sel1 repeat;	IPR011009 (Protein kinase-like domain; IPR011990 (Tetratricopeptide-like helical)
RirG050940	8		PF07714=>Protein tyrosine kinase;PF08238=>Sel1 repeat;	IPR011009 (Protein kinase-like domain; IPR011990 (Tetratricopeptide-like helical)
RirG235180	8	GO:0001819=>positive regulation of cytokine production=>y9957_dicdi ame: full=probable serine threonine-protein kinase ddb_g0276181;GO:0002224=>toll-like receptor signaling pathway=>y9957_dicdi ame: full=probable serine threonine-protein kinase ddb_g0276181;GO:0005515=>protein binding=>y9957_dicdi ame: full=probable serine threonine-protein kinase ddb_g0276181;GO:0006139=>nucleobase-containing co…	PF07714=>Protein tyrosine kinase;PF08238=>Sel1 repeat;	IPR011009 (Protein kinase-like domain; IPR011990 (Tetratricopeptide-like helical)
RirG069970	8	GO:0006915=>apoptotic process=>ybeq_ecoli ame: full=uncharacterized protein;GO:0043231=>intracellular membrane-bounded organelle=>ybeq_ecoli ame: full=uncharacterized protein;GO:0044444=>cytoplasmic part=>ybeq_ecoli ame: full=uncharacterized protein;GO:0050789=>regulation of biological process=>ybeq_ecoli ame: full=uncharacterized protein;GO:0050896=>response to stimulus=>ybeq_ecoli ame: full=unc…	PF08238=>Sel1 repeat;	IPR011990 (Tetratricopeptide-like helical)
RirG239560	8	GO:0009987=>cellular process=>ybeq_ecoli ame: full=uncharacterized protein;GO:0050896=>response to stimulus=>ybeq_ecoli ame: full=uncharacterized protein);	PF08238=>Sel1 repeat;	IPR011990 (Tetratricopeptide-like helical)
RirG108510	8	GO:0009987=>cellular process=>ybeq_ecoli ame: full=uncharacterized protein;GO:0050896=>response to stimulus=>ybeq_ecoli ame: full=uncharacterized protein);	PF08238=>Sel1 repeat;	IPR011990 (Tetratricopeptide-like helical)
RirG237130	8	GO:0005737=>cytoplasm=>ybeq_ecoli ame: full=uncharacterized protein;GO:0009987=>cellular process=>ybeq_ecoli ame: full=uncharacterized protein;GO:0050896=>response to stimulus=>ybeq_ecoli ame: full=uncharacterized protein);	PF08238=>Sel1 repeat;	IPR011990 (Tetratricopeptide-like helical)
RirG235170	8	GO:0009987=>cellular process=>ybeq_ecoli ame: full=uncharacterized protein;GO:0050896=>response to stimulus=>ybeq_ecoli ame: full=uncharacterized protein);	PF08238=>Sel1 repeat;	IPR011990 (Tetratricopeptide-like helical)
RirG223530	8	GO:0001819=>positive regulation of cytokine production=>yr826_mimiv ame: full= serine threonine-protein kinase receptor r826 flags: precursor;GO:0002224=>toll-like receptor signaling pathway=>yr826_mimiv ame: full= serine threonine-protein kinase receptor r826 flags: precursor;GO:0004672=>protein kinase activity=>yr826_mimiv ame: full= serine threonine-protein kinase receptor r826 flags: precurso…	PF07714=>Protein tyrosine kinase;PF08238=>Sel1 repeat;	IPR011009 (Protein kinase-like domain; IPR011990 (Tetratricopeptide-like helical)
RirG235110	8	GO:0004672=>protein kinase activity=>p2c31_arath ame: full=protein kinase and pp2c-like domain-containing protein includes: ame: full=probable serine threonine protein kinase at2g40860 includes: ame: full=probable protein phosphatase 2c 31 short= 2c31;GO:0005515=>protein binding=>p2c31_arath ame: full=protein kinase and pp2c-like domain-containing protein includes: ame: full=probable serine threo…	PF00069=>Protein kinase domain;	IPR011009 (Protein kinase-like domain)
RirG109600	8	GO:0004672=>protein kinase activity=>ybeq_ecoli ame: full=uncharacterized protein;GO:0005488=>binding=>ybeq_ecoli ame: full=uncharacterized protein;GO:0005737=>cytoplasm=>ybeq_ecoli ame: full=uncharacterized protein;GO:0006468=>protein phosphorylation=>ybeq_ecoli ame: full=uncharacterized protein;GO:0007050=>cell cycle arrest=>ybeq_ecoli ame: full=uncharacterized protein;GO:0007165=>signal transd…	PF00069=>Protein kinase domain;PF08238=>Sel1 repeat;	IPR011009 (Protein kinase-like domain; IPR011990 (Tetratricopeptide-like helical)
RirG066210	8	GO:0002224=>toll-like receptor signaling pathway=>ybeq_ecoli ame: full=uncharacterized protein;GO:0004672=>protein kinase activity=>ybeq_ecoli ame: full=uncharacterized protein;GO:0005488=>binding=>ybeq_ecoli ame: full=uncharacterized protein;GO:0006139=>nucleobase-containing compound metabolic process=>ybeq_ecoli ame: full=uncharacterized protein;GO:0007166=>cell surface receptor signaling pathw…	PF07714=>Protein tyrosine kinase;PF08238=>Sel1 repeat;	IPR011009 (Protein kinase-like domain; IPR011990 (Tetratricopeptide-like helical)
RirG000890	8		PF08238=>Sel1 repeat;	IPR011990 (Tetratricopeptide-like helical)
RirG225610	8	GO:0009987=>cellular process=>ybeq_ecoli ame: full=uncharacterized protein;GO:0043231=>intracellular membrane-bounded organelle=>ybeq_ecoli ame: full=uncharacterized protein;GO:0044444=>cytoplasmic part=>ybeq_ecoli ame: full=uncharacterized protein;GO:0050896=>response to stimulus=>ybeq_ecoli ame: full=uncharacterized protein);	PF08238=>Sel1 repeat;	IPR011990 (Tetratricopeptide-like helical)
RirG239670	8	GO:0006915=>apoptotic process=>ybeq_ecoli ame: full=uncharacterized protein;GO:0043231=>intracellular membrane-bounded organelle=>ybeq_ecoli ame: full=uncharacterized protein;GO:0044444=>cytoplasmic part=>ybeq_ecoli ame: full=uncharacterized protein;GO:0050789=>regulation of biological process=>ybeq_ecoli ame: full=uncharacterized protein;GO:0050896=>response to stimulus=>ybeq_ecoli ame: full=unc…	PF08238=>Sel1 repeat;	IPR011990 (Tetratricopeptide-like helical)
RirG119890	8	GO:0006915=>apoptotic process=>ybeq_ecoli ame: full=uncharacterized protein;GO:0008152=>metabolic process=>ybeq_ecoli ame: full=uncharacterized protein;GO:0043231=>intracellular membrane-bounded organelle=>ybeq_ecoli ame: full=uncharacterized protein;GO:0044444=>cytoplasmic part=>ybeq_ecoli ame: full=uncharacterized protein;GO:0050789=>regulation of biological process=>ybeq_ecoli ame: full=unchar…	PF08238=>Sel1 repeat;	IPR011990 (Tetratricopeptide-like helical)
RirG183110	8	GO:0002224=>toll-like receptor signaling pathway=>ybeq_ecoli ame: full=uncharacterized protein;GO:0004674=>protein serine/threonine kinase activity=>ybeq_ecoli ame: full=uncharacterized protein;GO:0005488=>binding=>ybeq_ecoli ame: full=uncharacterized protein;GO:0007015=>actin filament organization=>ybeq_ecoli ame: full=uncharacterized protein;GO:0007166=>cell surface receptor signaling pathway=>…	PF07714=>Protein tyrosine kinase;PF08238=>Sel1 repeat;	IPR011009 (Protein kinase-like domain; IPR011990 (Tetratricopeptide-like helical)
RirG268140	8	GO:0009987=>cellular process=>ybeq_ecoli ame: full=uncharacterized protein;GO:0043231=>intracellular membrane-bounded organelle=>ybeq_ecoli ame: full=uncharacterized protein;GO:0044444=>cytoplasmic part=>ybeq_ecoli ame: full=uncharacterized protein);	PF07714=>Protein tyrosine kinase;PF08238=>Sel1 repeat;	IPR011009 (Protein kinase-like domain; IPR011990 (Tetratricopeptide-like helical)
RirG204980	8	GO:0001819=>positive regulation of cytokine production=>ripk1_mouse ame: full=receptor-interacting serine threonine-protein kinase 1 ame: full=cell death protein rip ame: full=receptor-interacting protein 1 short=rip-1 ame: full=serine threonine-protein kinase rip;GO:0002224=>toll-like receptor signaling pathway=>ripk1_mouse ame: full=receptor-interacting serine threonine-protein kinase 1 ame: fu…	PF00069=>Protein kinase domain;	IPR011009 (Protein kinase-like domain)
RirG045260	8		PF08238=>Sel1 repeat;	IPR011990 (Tetratricopeptide-like helical)
RirG057970	8	GO:0009987=>cellular process=>ybeq_ecoli ame: full=uncharacterized protein;GO:0050896=>response to stimulus=>ybeq_ecoli ame: full=uncharacterized protein);	PF08238=>Sel1 repeat;	IPR011990 (Tetratricopeptide-like helical)
RirG086360	8	GO:0009987=>cellular process=>ybeq_ecoli ame: full=uncharacterized protein;GO:0050896=>response to stimulus=>ybeq_ecoli ame: full=uncharacterized protein);	PF00069=>Protein kinase domain;PF08238=>Sel1 repeat;	IPR011009 (Protein kinase-like domain; IPR011990 (Tetratricopeptide-like helical)
RirG140630	8	GO:0004674=>protein serine/threonine kinase activity=>y9957_dicdi ame: full=probable serine threonine-protein kinase ddb_g0276181;GO:0005886=>plasma membrane=>y9957_dicdi ame: full=probable serine threonine-protein kinase ddb_g0276181;GO:0006468=>protein phosphorylation=>y9957_dicdi ame: full=probable serine threonine-protein kinase ddb_g0276181;GO:0010942=>positive regulation of cell death=>y995…	PF07714=>Protein tyrosine kinase;PF08238=>Sel1 repeat;	IPR011009 (Protein kinase-like domain; IPR011990 (Tetratricopeptide-like helical)
RirG075740	8	GO:0001819=>positive regulation of cytokine production=>ybeq_ecoli ame: full=uncharacterized protein;GO:0002009=>morphogenesis of an epithelium=>ybeq_ecoli ame: full=uncharacterized protein;GO:0004672=>protein kinase activity=>ybeq_ecoli ame: full=uncharacterized protein;GO:0005515=>protein binding=>ybeq_ecoli ame: full=uncharacterized protein;GO:0006351=>transcription, DNA-dependent=>ybeq_ecoli …	PF07714=>Protein tyrosine kinase;PF08238=>Sel1 repeat;	IPR011009 (Protein kinase-like domain; IPR011990 (Tetratricopeptide-like helical)
RirG028800	8	GO:0002009=>morphogenesis of an epithelium=>ripk1_mouse ame: full=receptor-interacting serine threonine-protein kinase 1 ame: full=cell death protein rip ame: full=receptor-interacting protein 1 short=rip-1 ame: full=serine threonine-protein kinase rip;GO:0004674=>protein serine/threonine kinase activity=>ripk1_mouse ame: full=receptor-interacting serine threonine-protein kinase 1 ame: full=cell …	PF07714=>Protein tyrosine kinase;	IPR011009 (Protein kinase-like domain)
RirG065150	8	GO:0001817=>regulation of cytokine production=>yr831_mimiv ame: full= serine threonine-protein kinase receptor r831 flags: precursor;GO:0002366=>leukocyte activation involved in immune response=>yr831_mimiv ame: full= serine threonine-protein kinase receptor r831 flags: precursor;GO:0002694=>regulation of leukocyte activation=>yr831_mimiv ame: full= serine threonine-protein kinase receptor r831 f…	PF07714=>Protein tyrosine kinase;	IPR011009 (Protein kinase-like domain)
RirG033500	8	GO:0000186=>activation of MAPKK activity=>shkd_dicdi ame: full=dual specificity protein kinase shkd ame: full=sh2 domain-containing protein 4 ame: full=sh2 domain-containing protein d;GO:0001819=>positive regulation of cytokine production=>shkd_dicdi ame: full=dual specificity protein kinase shkd ame: full=sh2 domain-containing protein 4 ame: full=sh2 domain-containing protein d;GO:0002009=>morph…	PF00069=>Protein kinase domain;	IPR011009 (Protein kinase-like domain)
RirG139450	8	GO:0001819=>positive regulation of cytokine production=>yr831_mimiv ame: full= serine threonine-protein kinase receptor r831 flags: precursor;GO:0002224=>toll-like receptor signaling pathway=>yr831_mimiv ame: full= serine threonine-protein kinase receptor r831 flags: precursor;GO:0004674=>protein serine/threonine kinase activity=>yr831_mimiv ame: full= serine threonine-protein kinase receptor r83…	PF00069=>Protein kinase domain;	IPR011009 (Protein kinase-like domain)
RirG141850	8	GO:0000165=>MAPK cascade=>shkd_dicdi ame: full=dual specificity protein kinase shkd ame: full=sh2 domain-containing protein 4 ame: full=sh2 domain-containing protein d;GO:0004674=>protein serine/threonine kinase activity=>shkd_dicdi ame: full=dual specificity protein kinase shkd ame: full=sh2 domain-containing protein 4 ame: full=sh2 domain-containing protein d;GO:0005515=>protein binding=>shkd_d…	PF00069=>Protein kinase domain;	IPR011009 (Protein kinase-like domain)
RirG026970	8	GO:0009987=>cellular process=>ybeq_ecoli ame: full=uncharacterized protein;GO:0050896=>response to stimulus=>ybeq_ecoli ame: full=uncharacterized protein);	PF08238=>Sel1 repeat;	IPR011990 (Tetratricopeptide-like helical)
RirG035760	8	GO:0005739=>mitochondrion=>se1l1_mouse ame: full=protein sel-1 homolog 1 ame: full=suppressor of lin-12-like protein 1 short=sel-1l flags: precursor;GO:0009987=>cellular process=>se1l1_mouse ame: full=protein sel-1 homolog 1 ame: full=suppressor of lin-12-like protein 1 short=sel-1l flags: precursor);	PF08238=>Sel1 repeat;	IPR003656 (Zinc finger, BED-type predicted; IPR011990 (Tetratricopeptide-like helical)
RirG049040	8	GO:0043231=>intracellular membrane-bounded organelle=>ybeq_ecoli ame: full=uncharacterized protein;GO:0044444=>cytoplasmic part=>ybeq_ecoli ame: full=uncharacterized protein);	PF08238=>Sel1 repeat;	IPR011990 (Tetratricopeptide-like helical)
RirG201490	8	GO:0006915=>apoptotic process=>ybeq_ecoli ame: full=uncharacterized protein);	PF08238=>Sel1 repeat;	IPR011990 (Tetratricopeptide-like helical)
RirG006740	8		PF08238=>Sel1 repeat;	IPR011990 (Tetratricopeptide-like helical)
RirG252500	8	GO:0000902=>cell morphogenesis=>y9963_dicdi ame: full=probable serine threonine-protein kinase ddb_g0272254;GO:0002224=>toll-like receptor signaling pathway=>y9963_dicdi ame: full=probable serine threonine-protein kinase ddb_g0272254;GO:0003008=>system process=>y9963_dicdi ame: full=probable serine threonine-protein kinase ddb_g0272254;GO:0004672=>protein kinase activity=>y9963_dicdi ame: full=pr…	PF07714=>Protein tyrosine kinase;	IPR011009 (Protein kinase-like domain)
RirG196010	8	GO:0001819=>positive regulation of cytokine production=>ht1_arath ame: full=serine threonine-protein kinase ht1 ame: full=high leaf temperature protein 1;GO:0002224=>toll-like receptor signaling pathway=>ht1_arath ame: full=serine threonine-protein kinase ht1 ame: full=high leaf temperature protein 1;GO:0002252=>immune effector process=>ht1_arath ame: full=serine threonine-protein kinase ht1 ame:…	PF07714=>Protein tyrosine kinase;	IPR011009 (Protein kinase-like domain)
RirG192520	8	GO:0000187=>activation of MAPK activity=>drkd_dicdi ame: full=probable serine threonine-protein kinase drkd ame: full=receptor-like kinase d;GO:0001819=>positive regulation of cytokine production=>drkd_dicdi ame: full=probable serine threonine-protein kinase drkd ame: full=receptor-like kinase d;GO:0002224=>toll-like receptor signaling pathway=>drkd_dicdi ame: full=probable serine threonine-prote…	PF00069=>Protein kinase domain;	IPR011009 (Protein kinase-like domain)
RirG150250	8	GO:0001819=>positive regulation of cytokine production=>shkd_dicdi ame: full=dual specificity protein kinase shkd ame: full=sh2 domain-containing protein 4 ame: full=sh2 domain-containing protein d;GO:0002224=>toll-like receptor signaling pathway=>shkd_dicdi ame: full=dual specificity protein kinase shkd ame: full=sh2 domain-containing protein 4 ame: full=sh2 domain-containing protein d;GO:000467…	PF00069=>Protein kinase domain;	IPR011009 (Protein kinase-like domain)
RirG140520	8	GO:0004672=>protein kinase activity=>yr831_mimiv ame: full= serine threonine-protein kinase receptor r831 flags: precursor;GO:0005488=>binding=>yr831_mimiv ame: full= serine threonine-protein kinase receptor r831 flags: precursor;GO:0005622=>intracellular=>yr831_mimiv ame: full= serine threonine-protein kinase receptor r831 flags: precursor;GO:0006468=>protein phosphorylation=>yr831_mimiv ame: fu…	PF00069=>Protein kinase domain;	IPR011009 (Protein kinase-like domain)
RirG137880	8	GO:0001819=>positive regulation of cytokine production=>y9963_dicdi ame: full=probable serine threonine-protein kinase ddb_g0272254;GO:0002224=>toll-like receptor signaling pathway=>y9963_dicdi ame: full=probable serine threonine-protein kinase ddb_g0272254;GO:0002825=>regulation of T-helper 1 type immune response=>y9963_dicdi ame: full=probable serine threonine-protein kinase ddb_g0272254;GO:000…	PF07714=>Protein tyrosine kinase;	IPR011009 (Protein kinase-like domain)
RirG206420	8	GO:0004674=>protein serine/threonine kinase activity=>y9844_dicdi ame: full=probable serine threonine-protein kinase ddb_g0282963;GO:0005488=>binding=>y9844_dicdi ame: full=probable serine threonine-protein kinase ddb_g0282963;GO:0006468=>protein phosphorylation=>y9844_dicdi ame: full=probable serine threonine-protein kinase ddb_g0282963;GO:0007165=>signal transduction=>y9844_dicdi ame: full=prob…	PF00069=>Protein kinase domain;	IPR011009 (Protein kinase-like domain)
RirG021330	8	GO:0009987=>cellular process=>ybeq_ecoli ame: full=uncharacterized protein;GO:0043231=>intracellular membrane-bounded organelle=>ybeq_ecoli ame: full=uncharacterized protein;GO:0044444=>cytoplasmic part=>ybeq_ecoli ame: full=uncharacterized protein);	PF08238=>Sel1 repeat;	IPR011990 (Tetratricopeptide-like helical)
RirG236950	8	GO:0002224=>toll-like receptor signaling pathway=>y9963_dicdi ame: full=probable serine threonine-protein kinase ddb_g0272254;GO:0004672=>protein kinase activity=>y9963_dicdi ame: full=probable serine threonine-protein kinase ddb_g0272254;GO:0005488=>binding=>y9963_dicdi ame: full=probable serine threonine-protein kinase ddb_g0272254;GO:0006139=>nucleobase-containing compound metabolic process=>y…	PF07714=>Protein tyrosine kinase;	IPR011009 (Protein kinase-like domain)
RirG121880	8	GO:0000165=>MAPK cascade=>y9955_dicdi ame: full=probable serine threonine-protein kinase ddb_g0267514;GO:0004672=>protein kinase activity=>y9955_dicdi ame: full=probable serine threonine-protein kinase ddb_g0267514;GO:0005488=>binding=>y9955_dicdi ame: full=probable serine threonine-protein kinase ddb_g0267514;GO:0009966=>regulation of signal transduction=>y9955_dicdi ame: full=probable serine th…	PF07714=>Protein tyrosine kinase;	IPR011009 (Protein kinase-like domain)
RirG236930	8	GO:0003824=>catalytic activity=>y9963_dicdi ame: full=probable serine threonine-protein kinase ddb_g0272254);	PF07714=>Protein tyrosine kinase;	IPR011009 (Protein kinase-like domain)
RirG082280	8	GO:0000166=>nucleotide binding=>y9957_dicdi ame: full=probable serine threonine-protein kinase ddb_g0276181;GO:0000186=>activation of MAPKK activity=>y9957_dicdi ame: full=probable serine threonine-protein kinase ddb_g0276181;GO:0000187=>activation of MAPK activity=>y9957_dicdi ame: full=probable serine threonine-protein kinase ddb_g0276181;GO:0001819=>positive regulation of cytokine production=>…	PF07714=>Protein tyrosine kinase;	IPR011009 (Protein kinase-like domain)
RirG099780	8	GO:0001819=>positive regulation of cytokine production=>shkd_dicdi ame: full=dual specificity protein kinase shkd ame: full=sh2 domain-containing protein 4 ame: full=sh2 domain-containing protein d;GO:0002009=>morphogenesis of an epithelium=>shkd_dicdi ame: full=dual specificity protein kinase shkd ame: full=sh2 domain-containing protein 4 ame: full=sh2 domain-containing protein d;GO:0002224=>tol…	PF00069=>Protein kinase domain;	IPR011009 (Protein kinase-like domain)
RirG139070	8	GO:0000186=>activation of MAPKK activity=>csf12_fugru ame: full=macrophage colony-stimulating factor 1 receptor 2 short=csf-1-r 2 flags: precursor;GO:0001819=>positive regulation of cytokine production=>csf12_fugru ame: full=macrophage colony-stimulating factor 1 receptor 2 short=csf-1-r 2 flags: precursor;GO:0002224=>toll-like receptor signaling pathway=>csf12_fugru ame: full=macrophage colony-s…	PF07714=>Protein tyrosine kinase;	IPR011009 (Protein kinase-like domain)
RirG141050	8	GO:0000166=>nucleotide binding=>y9957_dicdi ame: full=probable serine threonine-protein kinase ddb_g0276181;GO:0000186=>activation of MAPKK activity=>y9957_dicdi ame: full=probable serine threonine-protein kinase ddb_g0276181;GO:0000187=>activation of MAPK activity=>y9957_dicdi ame: full=probable serine threonine-protein kinase ddb_g0276181;GO:0001819=>positive regulation of cytokine production=>…	PF00069=>Protein kinase domain;	IPR011009 (Protein kinase-like domain)
RirG176600	8	GO:0000186=>activation of MAPKK activity=>y9957_dicdi ame: full=probable serine threonine-protein kinase ddb_g0276181;GO:0000187=>activation of MAPK activity=>y9957_dicdi ame: full=probable serine threonine-protein kinase ddb_g0276181;GO:0001525=>angiogenesis=>y9957_dicdi ame: full=probable serine threonine-protein kinase ddb_g0276181;GO:0001841=>neural tube formation=>y9957_dicdi ame: full=proba…	PF07714=>Protein tyrosine kinase;	IPR011009 (Protein kinase-like domain)
RirG239330	8	GO:0002009=>morphogenesis of an epithelium=>y9957_dicdi ame: full=probable serine threonine-protein kinase ddb_g0276181;GO:0002252=>immune effector process=>y9957_dicdi ame: full=probable serine threonine-protein kinase ddb_g0276181;GO:0002440=>production of molecular mediator of immune response=>y9957_dicdi ame: full=probable serine threonine-protein kinase ddb_g0276181;GO:0002521=>leukocyte dif…	PF07714=>Protein tyrosine kinase;	IPR020685 (Tyrosine-protein kinase)
RirG163190	8	GO:0004672=>protein kinase activity=>m3k7_drome ame: full=mitogen-activated protein kinase kinase kinase 7 ame: full=tgf-beta-activated kinase 1 ame: full=dtak1;GO:0006952=>defense response=>m3k7_drome ame: full=mitogen-activated protein kinase kinase kinase 7 ame: full=tgf-beta-activated kinase 1 ame: full=dtak1;GO:0006955=>immune response=>m3k7_drome ame: full=mitogen-activated protein kinase k…	PF07714=>Protein tyrosine kinase;	IPR011009 (Protein kinase-like domain)
RirG111990	8		PF07714=>Protein tyrosine kinase;	IPR011009 (Protein kinase-like domain)
RirG266330	8	GO:0003008=>system process=>yr818_mimiv ame: full= serine threonine-protein kinase receptor r818 flags: precursor;GO:0004672=>protein kinase activity=>yr818_mimiv ame: full= serine threonine-protein kinase receptor r818 flags: precursor;GO:0005515=>protein binding=>yr818_mimiv ame: full= serine threonine-protein kinase receptor r818 flags: precursor;GO:0005634=>nucleus=>yr818_mimiv ame: full= ser…	PF07714=>Protein tyrosine kinase;	IPR011009 (Protein kinase-like domain)
RirG126110	8	GO:0016740=>transferase activity=>ht1_arath ame: full=serine threonine-protein kinase ht1 ame: full=high leaf temperature protein 1);	PF07714=>Protein tyrosine kinase;	IPR011009 (Protein kinase-like domain)
RirG168330	8	GO:0001819=>positive regulation of cytokine production=>limkb_dicdi ame: full=probable lim domain-containing serine threonine-protein kinase ddb_g0286997;GO:0002224=>toll-like receptor signaling pathway=>limkb_dicdi ame: full=probable lim domain-containing serine threonine-protein kinase ddb_g0286997;GO:0004672=>protein kinase activity=>limkb_dicdi ame: full=probable lim domain-containing serine …	PF07714=>Protein tyrosine kinase;	IPR011009 (Protein kinase-like domain)
RirG110900	8	GO:0005488=>binding=>roco8_dicdi ame: full=probable serine threonine-protein kinase roco8 ame: full=ras of complex proteins and c-terminal of roc 8;GO:0016772=>transferase activity, transferring phosphorus-containing groups=>roco8_dicdi ame: full=probable serine threonine-protein kinase roco8 ame: full=ras of complex proteins and c-terminal of roc 8;GO:0044237=>cellular metabolic process=>roco8_d…	PF07714=>Protein tyrosine kinase;	IPR011009 (Protein kinase-like domain)
RirG237010	8	GO:0004672=>protein kinase activity=>y9963_dicdi ame: full=probable serine threonine-protein kinase ddb_g0272254;GO:0005488=>binding=>y9963_dicdi ame: full=probable serine threonine-protein kinase ddb_g0272254;GO:0005622=>intracellular=>y9963_dicdi ame: full=probable serine threonine-protein kinase ddb_g0272254;GO:0009743=>response to carbohydrate stimulus=>y9963_dicdi ame: full=probable serine t…	PF07714=>Protein tyrosine kinase;	IPR011009 (Protein kinase-like domain)
RirG216270	8	GO:0000166=>nucleotide binding=>y1199_dicdi ame: full=probable serine threonine-protein kinase ddb_g0282895;GO:0004674=>protein serine/threonine kinase activity=>y1199_dicdi ame: full=probable serine threonine-protein kinase ddb_g0282895;GO:0006979=>response to oxidative stress=>y1199_dicdi ame: full=probable serine threonine-protein kinase ddb_g0282895;GO:0007254=>JNK cascade=>y1199_dicdi ame: f…	PF07714=>Protein tyrosine kinase;	IPR011009 (Protein kinase-like domain)
RirG217390	8	GO:0004672=>protein kinase activity=>p2c31_arath ame: full=protein kinase and pp2c-like domain-containing protein includes: ame: full=probable serine threonine protein kinase at2g40860 includes: ame: full=probable protein phosphatase 2c 31 short= 2c31;GO:0005515=>protein binding=>p2c31_arath ame: full=protein kinase and pp2c-like domain-containing protein includes: ame: full=probable serine threo…	PF07714=>Protein tyrosine kinase;	IPR011009 (Protein kinase-like domain)
RirG217280	8	GO:0004672=>protein kinase activity=>p2c31_arath ame: full=protein kinase and pp2c-like domain-containing protein includes: ame: full=probable serine threonine protein kinase at2g40860 includes: ame: full=probable protein phosphatase 2c 31 short= 2c31;GO:0016310=>phosphorylation=>p2c31_arath ame: full=protein kinase and pp2c-like domain-containing protein includes: ame: full=probable serine threo…	PF00069=>Protein kinase domain;	IPR011009 (Protein kinase-like domain)
RirG239780	8	GO:0016740=>transferase activity=>yr826_mimiv ame: full= serine threonine-protein kinase receptor r826 flags: precursor);	PF07714=>Protein tyrosine kinase;	IPR011009 (Protein kinase-like domain)
RirG011680	8	GO:0000166=>nucleotide binding=>y9957_dicdi ame: full=probable serine threonine-protein kinase ddb_g0276181;GO:0001819=>positive regulation of cytokine production=>y9957_dicdi ame: full=probable serine threonine-protein kinase ddb_g0276181;GO:0002224=>toll-like receptor signaling pathway=>y9957_dicdi ame: full=probable serine threonine-protein kinase ddb_g0276181;GO:0004674=>protein serine/threon…	PF07714=>Protein tyrosine kinase;	IPR011009 (Protein kinase-like domain)
RirG019580	8	GO:0005515=>protein binding=>ripk1_mouse ame: full=receptor-interacting serine threonine-protein kinase 1 ame: full=cell death protein rip ame: full=receptor-interacting protein 1 short=rip-1 ame: full=serine threonine-protein kinase rip;GO:0005737=>cytoplasm=>ripk1_mouse ame: full=receptor-interacting serine threonine-protein kinase 1 ame: full=cell death protein rip ame: full=receptor-interacti…	PF07714=>Protein tyrosine kinase;PF08238=>Sel1 repeat;	IPR011009 (Protein kinase-like domain; IPR011990 (Tetratricopeptide-like helical)
RirG016660	8	GO:0016772=>transferase activity, transferring phosphorus-containing groups=>ybeq_ecoli ame: full=uncharacterized protein);	PF07714=>Protein tyrosine kinase;PF08238=>Sel1 repeat;	IPR011009 (Protein kinase-like domain; IPR011990 (Tetratricopeptide-like helical)
RirG054130	8	GO:0000186=>activation of MAPKK activity=>y9957_dicdi ame: full=probable serine threonine-protein kinase ddb_g0276181;GO:0002224=>toll-like receptor signaling pathway=>y9957_dicdi ame: full=probable serine threonine-protein kinase ddb_g0276181;GO:0002252=>immune effector process=>y9957_dicdi ame: full=probable serine threonine-protein kinase ddb_g0276181;GO:0004709=>MAP kinase kinase kinase activ…	PF07714=>Protein tyrosine kinase;	IPR011009 (Protein kinase-like domain)
RirG036420	8	GO:0002224=>toll-like receptor signaling pathway=>y9955_dicdi ame: full=probable serine threonine-protein kinase ddb_g0267514;GO:0004672=>protein kinase activity=>y9955_dicdi ame: full=probable serine threonine-protein kinase ddb_g0267514;GO:0005488=>binding=>y9955_dicdi ame: full=probable serine threonine-protein kinase ddb_g0267514;GO:0005622=>intracellular=>y9955_dicdi ame: full=probable serin…	PF00069=>Protein kinase domain;	IPR011009 (Protein kinase-like domain)
RirG051050	8	GO:0003008=>system process=>yr818_mimiv ame: full= serine threonine-protein kinase receptor r818 flags: precursor;GO:0004672=>protein kinase activity=>yr818_mimiv ame: full= serine threonine-protein kinase receptor r818 flags: precursor;GO:0005515=>protein binding=>yr818_mimiv ame: full= serine threonine-protein kinase receptor r818 flags: precursor;GO:0005634=>nucleus=>yr818_mimiv ame: full= ser…	PF07714=>Protein tyrosine kinase;	IPR011009 (Protein kinase-like domain)
RirG141750	8		PF07714=>Protein tyrosine kinase;	IPR001245 (Serine-threonine/tyrosine-protein kinase)
RirG024420	8	GO:0009987=>cellular process=>ybeq_ecoli ame: full=uncharacterized protein;GO:0043231=>intracellular membrane-bounded organelle=>ybeq_ecoli ame: full=uncharacterized protein;GO:0044444=>cytoplasmic part=>ybeq_ecoli ame: full=uncharacterized protein);	PF07714=>Protein tyrosine kinase;PF08238=>Sel1 repeat;	IPR011009 (Protein kinase-like domain; IPR011990 (Tetratricopeptide-like helical)
RirG007450	8	GO:0009987=>cellular process=>ybeq_ecoli ame: full=uncharacterized protein;GO:0042221=>response to chemical stimulus=>ybeq_ecoli ame: full=uncharacterized protein);	PF08238=>Sel1 repeat;	IPR011990 (Tetratricopeptide-like helical)
RirG068790	8	GO:0004672=>protein kinase activity=>m3k7_drome ame: full=mitogen-activated protein kinase kinase kinase 7 ame: full=tgf-beta-activated kinase 1 ame: full=dtak1;GO:0006952=>defense response=>m3k7_drome ame: full=mitogen-activated protein kinase kinase kinase 7 ame: full=tgf-beta-activated kinase 1 ame: full=dtak1;GO:0006955=>immune response=>m3k7_drome ame: full=mitogen-activated protein kinase k…	PF07714=>Protein tyrosine kinase;	IPR011009 (Protein kinase-like domain)
RirG071480	8		PF07714=>Protein tyrosine kinase;	IPR011009 (Protein kinase-like domain)
RirG009930	8	GO:0004674=>protein serine/threonine kinase activity=>ybeq_ecoli ame: full=uncharacterized protein;GO:0005488=>binding=>ybeq_ecoli ame: full=uncharacterized protein;GO:0006952=>defense response=>ybeq_ecoli ame: full=uncharacterized protein;GO:0006955=>immune response=>ybeq_ecoli ame: full=uncharacterized protein;GO:0007049=>cell cycle=>ybeq_ecoli ame: full=uncharacterized protein;GO:0007254=>JNK …	PF00069=>Protein kinase domain;PF08238=>Sel1 repeat;	IPR011009 (Protein kinase-like domain; IPR011990 (Tetratricopeptide-like helical)
RirG016260	8	GO:0004672=>protein kinase activity=>y9963_dicdi ame: full=probable serine threonine-protein kinase ddb_g0272254;GO:0009987=>cellular process=>y9963_dicdi ame: full=probable serine threonine-protein kinase ddb_g0272254);	PF07714=>Protein tyrosine kinase;	IPR011009 (Protein kinase-like domain)
RirG003790	8	GO:0000166=>nucleotide binding=>y9957_dicdi ame: full=probable serine threonine-protein kinase ddb_g0276181;GO:0000186=>activation of MAPKK activity=>y9957_dicdi ame: full=probable serine threonine-protein kinase ddb_g0276181;GO:0001819=>positive regulation of cytokine production=>y9957_dicdi ame: full=probable serine threonine-protein kinase ddb_g0276181;GO:0002224=>toll-like receptor signaling …	PF07714=>Protein tyrosine kinase;	IPR020685 (Tyrosine-protein kinase)
RirG010260	8		PF07714=>Protein tyrosine kinase;	IPR011009 (Protein kinase-like domain)
RirG095350	8	GO:0001819=>positive regulation of cytokine production=>yr818_mimiv ame: full= serine threonine-protein kinase receptor r818 flags: precursor;GO:0002224=>toll-like receptor signaling pathway=>yr818_mimiv ame: full= serine threonine-protein kinase receptor r818 flags: precursor;GO:0004672=>protein kinase activity=>yr818_mimiv ame: full= serine threonine-protein kinase receptor r818 flags: precurso…	PF07714=>Protein tyrosine kinase;	IPR011009 (Protein kinase-like domain)
RirG020030	9			IPR022364 (F-box domain, Skp2-like)
RirG236610	11	GO:0004672=>protein kinase activity=>roco4_dicdi ame: full=probable serine threonine-protein kinase roco4 ame: full=ras of complex proteins and c-terminal of roc 4;GO:0005515=>protein binding=>roco4_dicdi ame: full=probable serine threonine-protein kinase roco4 ame: full=ras of complex proteins and c-terminal of roc 4;GO:0005737=>cytoplasm=>roco4_dicdi ame: full=probable serine threonine-protein …	PF07714=>Protein tyrosine kinase;	IPR011009 (Protein kinase-like domain)
RirG115580	11	GO:0005488=>binding=>ybeq_ecoli ame: full=uncharacterized protein;GO:0016020=>membrane=>ybeq_ecoli ame: full=uncharacterized protein;GO:0016301=>kinase activity=>ybeq_ecoli ame: full=uncharacterized protein;GO:0044237=>cellular metabolic process=>ybeq_ecoli ame: full=uncharacterized protein;GO:0044464=>cell part=>ybeq_ecoli ame: full=uncharacterized protein;GO:0050896=>response to stimulus=>ybeq_…	PF07714=>Protein tyrosine kinase;PF08238=>Sel1 repeat;	IPR011009 (Protein kinase-like domain; IPR011990 (Tetratricopeptide-like helical)
RirG148230	11	GO:0016301=>kinase activity=>roco5_dicdi ame: full=probable serine threonine-protein kinase roco5 ame: full=ras of complex proteins and c-terminal of roc 5);	PF07714=>Protein tyrosine kinase;	IPR011009 (Protein kinase-like domain)
RirG175550	11	GO:0016301=>kinase activity=>roco8_dicdi ame: full=probable serine threonine-protein kinase roco8 ame: full=ras of complex proteins and c-terminal of roc 8);	PF00069=>Protein kinase domain;	IPR011009 (Protein kinase-like domain)
RirG175570	11	GO:0016301=>kinase activity=>zak1_dicdi ame: full=dual specificity protein kinase zaka ame: full=zaphod k kinase 1 short=zaphod kinase 1 ame: full=zaphod kinase a);	PF07714=>Protein tyrosine kinase;	IPR011009 (Protein kinase-like domain)
RirG158930	11	GO:0016301=>kinase activity=>zak1_dicdi ame: full=dual specificity protein kinase zaka ame: full=zaphod k kinase 1 short=zaphod kinase 1 ame: full=zaphod kinase a);	PF07714=>Protein tyrosine kinase;	IPR011009 (Protein kinase-like domain)
RirG259960	11	GO:0004672=>protein kinase activity=>zak1_dicdi ame: full=dual specificity protein kinase zaka ame: full=zaphod k kinase 1 short=zaphod kinase 1 ame: full=zaphod kinase a;GO:0005515=>protein binding=>zak1_dicdi ame: full=dual specificity protein kinase zaka ame: full=zaphod k kinase 1 short=zaphod kinase 1 ame: full=zaphod kinase a;GO:0005737=>cytoplasm=>zak1_dicdi ame: full=dual specificity prot…	PF07714=>Protein tyrosine kinase;	IPR011009 (Protein kinase-like domain)
RirG224450	11	GO:0001819=>positive regulation of cytokine production=>roco5_dicdi ame: full=probable serine threonine-protein kinase roco5 ame: full=ras of complex proteins and c-terminal of roc 5;GO:0002224=>toll-like receptor signaling pathway=>roco5_dicdi ame: full=probable serine threonine-protein kinase roco5 ame: full=ras of complex proteins and c-terminal of roc 5;GO:0004672=>protein kinase activity=>ro…	PF07714=>Protein tyrosine kinase;	IPR011009 (Protein kinase-like domain)
RirG244010	11	GO:0016301=>kinase activity=>zak1_dicdi ame: full=dual specificity protein kinase zaka ame: full=zaphod k kinase 1 short=zaphod kinase 1 ame: full=zaphod kinase a);	PF07714=>Protein tyrosine kinase;	IPR011009 (Protein kinase-like domain)
RirG220470	11	GO:0005515=>protein binding=>roco4_dicdi ame: full=probable serine threonine-protein kinase roco4 ame: full=ras of complex proteins and c-terminal of roc 4;GO:0005737=>cytoplasm=>roco4_dicdi ame: full=probable serine threonine-protein kinase roco4 ame: full=ras of complex proteins and c-terminal of roc 4;GO:0007166=>cell surface receptor signaling pathway=>roco4_dicdi ame: full=probable serine th…	PF00069=>Protein kinase domain;	IPR011009 (Protein kinase-like domain)
RirG220900	11	GO:0016301=>kinase activity=>zak1_dicdi ame: full=dual specificity protein kinase zaka ame: full=zaphod k kinase 1 short=zaphod kinase 1 ame: full=zaphod kinase a);	PF00069=>Protein kinase domain;	IPR011009 (Protein kinase-like domain)
RirG215630	11	GO:0004672=>protein kinase activity=>pats1_dicdi ame: full=probable serine threonine-protein kinase pats1 ame: full=protein associated with the transduction of signal 1;GO:0005515=>protein binding=>pats1_dicdi ame: full=probable serine threonine-protein kinase pats1 ame: full=protein associated with the transduction of signal 1;GO:0005737=>cytoplasm=>pats1_dicdi ame: full=probable serine threonin…	PF07714=>Protein tyrosine kinase;	IPR011009 (Protein kinase-like domain)
RirG259990	11	GO:0016301=>kinase activity=>roco5_dicdi ame: full=probable serine threonine-protein kinase roco5 ame: full=ras of complex proteins and c-terminal of roc 5);	PF07714=>Protein tyrosine kinase;	IPR011009 (Protein kinase-like domain)
RirG239530	11	GO:0016301=>kinase activity=>roco4_dicdi ame: full=probable serine threonine-protein kinase roco4 ame: full=ras of complex proteins and c-terminal of roc 4);	PF07714=>Protein tyrosine kinase;	IPR011009 (Protein kinase-like domain)
RirG159780	11	GO:0016301=>kinase activity=>zak1_dicdi ame: full=dual specificity protein kinase zaka ame: full=zaphod k kinase 1 short=zaphod kinase 1 ame: full=zaphod kinase a);	PF00069=>Protein kinase domain;	IPR011009 (Protein kinase-like domain)
RirG248630	11	GO:0016301=>kinase activity=>roco4_dicdi ame: full=probable serine threonine-protein kinase roco4 ame: full=ras of complex proteins and c-terminal of roc 4);	PF07714=>Protein tyrosine kinase;	IPR011009 (Protein kinase-like domain)
RirG163000	11	GO:0016301=>kinase activity=>y9963_dicdi ame: full=probable serine threonine-protein kinase ddb_g0272254);	PF07714=>Protein tyrosine kinase;	IPR011009 (Protein kinase-like domain)
RirG236630	11	GO:0002009=>morphogenesis of an epithelium=>zak1_dicdi ame: full=dual specificity protein kinase zaka ame: full=zaphod k kinase 1 short=zaphod kinase 1 ame: full=zaphod kinase a;GO:0002252=>immune effector process=>zak1_dicdi ame: full=dual specificity protein kinase zaka ame: full=zaphod k kinase 1 short=zaphod kinase 1 ame: full=zaphod kinase a;GO:0004709=>MAP kinase kinase kinase activity=>zak…	PF00069=>Protein kinase domain;	IPR011009 (Protein kinase-like domain)
RirG198220	11	GO:0016301=>kinase activity=>dusty_mouse ame: full=dual serine threonine and tyrosine protein kinase ame: full=dusty protein kinase short=dusty pk ame: full=receptor-interacting serine threonine-protein kinase 5);	PF07714=>Protein tyrosine kinase;	IPR011009 (Protein kinase-like domain)
RirG218770	11	GO:0001819=>positive regulation of cytokine production=>y9963_dicdi ame: full=probable serine threonine-protein kinase ddb_g0272254;GO:0002224=>toll-like receptor signaling pathway=>y9963_dicdi ame: full=probable serine threonine-protein kinase ddb_g0272254;GO:0004672=>protein kinase activity=>y9963_dicdi ame: full=probable serine threonine-protein kinase ddb_g0272254;GO:0005515=>protein binding=…	PF07714=>Protein tyrosine kinase;	IPR011009 (Protein kinase-like domain)
RirG215180	11	GO:0004672=>protein kinase activity=>roco7_dicdi ame: full=probable serine threonine-protein kinase roco7 ame: full=ras of complex proteins and c-terminal of roc 7;GO:0005488=>binding=>roco7_dicdi ame: full=probable serine threonine-protein kinase roco7 ame: full=ras of complex proteins and c-terminal of roc 7;GO:0009987=>cellular process=>roco7_dicdi ame: full=probable serine threonine-protein k…	PF07714=>Protein tyrosine kinase;	IPR011009 (Protein kinase-like domain)
RirG265810	11	GO:0005488=>binding=>roco5_dicdi ame: full=probable serine threonine-protein kinase roco5 ame: full=ras of complex proteins and c-terminal of roc 5;GO:0009987=>cellular process=>roco5_dicdi ame: full=probable serine threonine-protein kinase roco5 ame: full=ras of complex proteins and c-terminal of roc 5;GO:0016772=>transferase activity, transferring phosphorus-containing groups=>roco5_dicdi ame: …	PF07714=>Protein tyrosine kinase;	IPR011009 (Protein kinase-like domain)
RirG221270	11	GO:0016301=>kinase activity=>zak1_dicdi ame: full=dual specificity protein kinase zaka ame: full=zaphod k kinase 1 short=zaphod kinase 1 ame: full=zaphod kinase a);	PF07714=>Protein tyrosine kinase;	IPR011009 (Protein kinase-like domain)
RirG202640	11	GO:0004672=>protein kinase activity=>zak1_dicdi ame: full=dual specificity protein kinase zaka ame: full=zaphod k kinase 1 short=zaphod kinase 1 ame: full=zaphod kinase a;GO:0009987=>cellular process=>zak1_dicdi ame: full=dual specificity protein kinase zaka ame: full=zaphod k kinase 1 short=zaphod kinase 1 ame: full=zaphod kinase a);	PF07714=>Protein tyrosine kinase;	IPR011009 (Protein kinase-like domain)
RirG260030	11	GO:0016301=>kinase activity=>zak1_dicdi ame: full=dual specificity protein kinase zaka ame: full=zaphod k kinase 1 short=zaphod kinase 1 ame: full=zaphod kinase a);	PF07714=>Protein tyrosine kinase;	IPR011009 (Protein kinase-like domain)
RirG165150	11	GO:0004672=>protein kinase activity=>y9963_dicdi ame: full=probable serine threonine-protein kinase ddb_g0272254;GO:0044237=>cellular metabolic process=>y9963_dicdi ame: full=probable serine threonine-protein kinase ddb_g0272254;GO:0044238=>primary metabolic process=>y9963_dicdi ame: full=probable serine threonine-protein kinase ddb_g0272254;GO:0050794=>regulation of cellular process=>y9963_dicdi…	PF07714=>Protein tyrosine kinase;	IPR011009 (Protein kinase-like domain)
RirG183860	11	GO:0016301=>kinase activity=>phg2_dicdi ame: full=serine threonine-protein kinase phg2);	PF07714=>Protein tyrosine kinase;	IPR011009 (Protein kinase-like domain)
RirG244050	11	GO:0016301=>kinase activity=>y9963_dicdi ame: full=probable serine threonine-protein kinase ddb_g0272254);	PF07714=>Protein tyrosine kinase;	IPR011009 (Protein kinase-like domain)
RirG262510	11	GO:0004672=>protein kinase activity=>roco5_dicdi ame: full=probable serine threonine-protein kinase roco5 ame: full=ras of complex proteins and c-terminal of roc 5;GO:0044237=>cellular metabolic process=>roco5_dicdi ame: full=probable serine threonine-protein kinase roco5 ame: full=ras of complex proteins and c-terminal of roc 5;GO:0044238=>primary metabolic process=>roco5_dicdi ame: full=probabl…	PF07714=>Protein tyrosine kinase;	IPR011009 (Protein kinase-like domain)
RirG192830	11	GO:0000166=>nucleotide binding=>phg2_dicdi ame: full=serine threonine-protein kinase phg2;GO:0000186=>activation of MAPKK activity=>phg2_dicdi ame: full=serine threonine-protein kinase phg2;GO:0001819=>positive regulation of cytokine production=>phg2_dicdi ame: full=serine threonine-protein kinase phg2;GO:0002224=>toll-like receptor signaling pathway=>phg2_dicdi ame: full=serine threonine-protein…	PF07714=>Protein tyrosine kinase;	IPR011009 (Protein kinase-like domain)
RirG223140	11	GO:0001568=>blood vessel development=>y9963_dicdi ame: full=probable serine threonine-protein kinase ddb_g0272254;GO:0001934=>positive regulation of protein phosphorylation=>y9963_dicdi ame: full=probable serine threonine-protein kinase ddb_g0272254;GO:0003008=>system process=>y9963_dicdi ame: full=probable serine threonine-protein kinase ddb_g0272254;GO:0004713=>protein tyrosine kinase activity=…	PF07714=>Protein tyrosine kinase;	IPR011009 (Protein kinase-like domain)
RirG219090	11	GO:0001819=>positive regulation of cytokine production=>yr818_mimiv ame: full= serine threonine-protein kinase receptor r818 flags: precursor;GO:0002224=>toll-like receptor signaling pathway=>yr818_mimiv ame: full= serine threonine-protein kinase receptor r818 flags: precursor;GO:0004672=>protein kinase activity=>yr818_mimiv ame: full= serine threonine-protein kinase receptor r818 flags: precurso…	PF07714=>Protein tyrosine kinase;	IPR011009 (Protein kinase-like domain)
RirG183840	11	GO:0002009=>morphogenesis of an epithelium=>zak1_dicdi ame: full=dual specificity protein kinase zaka ame: full=zaphod k kinase 1 short=zaphod kinase 1 ame: full=zaphod kinase a;GO:0002252=>immune effector process=>zak1_dicdi ame: full=dual specificity protein kinase zaka ame: full=zaphod k kinase 1 short=zaphod kinase 1 ame: full=zaphod kinase a;GO:0004709=>MAP kinase kinase kinase activity=>zak…	PF07714=>Protein tyrosine kinase;	IPR011009 (Protein kinase-like domain)
RirG202660	11	GO:0016301=>kinase activity=>zak1_dicdi ame: full=dual specificity protein kinase zaka ame: full=zaphod k kinase 1 short=zaphod kinase 1 ame: full=zaphod kinase a);	PF07714=>Protein tyrosine kinase;	IPR011009 (Protein kinase-like domain)
RirG211270	11	GO:0016301=>kinase activity=>zak1_dicdi ame: full=dual specificity protein kinase zaka ame: full=zaphod k kinase 1 short=zaphod kinase 1 ame: full=zaphod kinase a);	PF00069=>Protein kinase domain;	IPR011009 (Protein kinase-like domain)
RirG158940	11	GO:0016301=>kinase activity=>zak1_dicdi ame: full=dual specificity protein kinase zaka ame: full=zaphod k kinase 1 short=zaphod kinase 1 ame: full=zaphod kinase a);	PF00069=>Protein kinase domain;	IPR011009 (Protein kinase-like domain)
RirG149120	11	GO:0004672=>protein kinase activity=>yr818_mimiv ame: full= serine threonine-protein kinase receptor r818 flags: precursor;GO:0005488=>binding=>yr818_mimiv ame: full= serine threonine-protein kinase receptor r818 flags: precursor;GO:0005622=>intracellular=>yr818_mimiv ame: full= serine threonine-protein kinase receptor r818 flags: precursor;GO:0006468=>protein phosphorylation=>yr818_mimiv ame: fu…	PF07714=>Protein tyrosine kinase;	IPR011009 (Protein kinase-like domain)
RirG248700	11	GO:0004672=>protein kinase activity=>roco7_dicdi ame: full=probable serine threonine-protein kinase roco7 ame: full=ras of complex proteins and c-terminal of roc 7);	PF07714=>Protein tyrosine kinase;	IPR011009 (Protein kinase-like domain)
RirG241800	11	GO:0016301=>kinase activity=>zak1_dicdi ame: full=dual specificity protein kinase zaka ame: full=zaphod k kinase 1 short=zaphod kinase 1 ame: full=zaphod kinase a);	PF07714=>Protein tyrosine kinase;	IPR011009 (Protein kinase-like domain)
RirG233810	11	GO:0016301=>kinase activity=>dusty_danre ame: full=dual serine threonine and tyrosine protein kinase ame: full=dusty protein kinase short=dusty pk ame: full=receptor-interacting serine threonine-protein kinase 5);	PF07714=>Protein tyrosine kinase;	IPR011009 (Protein kinase-like domain)
RirG204610	11	GO:0004672=>protein kinase activity=>y9963_dicdi ame: full=probable serine threonine-protein kinase ddb_g0272254;GO:0009987=>cellular process=>y9963_dicdi ame: full=probable serine threonine-protein kinase ddb_g0272254);	PF07714=>Protein tyrosine kinase;	IPR011009 (Protein kinase-like domain)
RirG181740	11	GO:0016301=>kinase activity=>roco4_dicdi ame: full=probable serine threonine-protein kinase roco4 ame: full=ras of complex proteins and c-terminal of roc 4);	PF07714=>Protein tyrosine kinase;	IPR011009 (Protein kinase-like domain)
RirG202650	11	GO:0016301=>kinase activity=>zak1_dicdi ame: full=dual specificity protein kinase zaka ame: full=zaphod k kinase 1 short=zaphod kinase 1 ame: full=zaphod kinase a);	PF07714=>Protein tyrosine kinase;	IPR011009 (Protein kinase-like domain)
RirG173080	11	GO:0016301=>kinase activity=>roco4_dicdi ame: full=probable serine threonine-protein kinase roco4 ame: full=ras of complex proteins and c-terminal of roc 4);	PF00069=>Protein kinase domain;	IPR011009 (Protein kinase-like domain)
RirG248690	11	GO:0016301=>kinase activity=>roco5_dicdi ame: full=probable serine threonine-protein kinase roco5 ame: full=ras of complex proteins and c-terminal of roc 5);	PF07714=>Protein tyrosine kinase;	IPR011009 (Protein kinase-like domain)
RirG227360	11	GO:0016301=>kinase activity=>phg2_dicdi ame: full=serine threonine-protein kinase phg2);	PF07714=>Protein tyrosine kinase;	IPR011009 (Protein kinase-like domain)
RirG170970	11	GO:0004674=>protein serine/threonine kinase activity=>roco4_dicdi ame: full=probable serine threonine-protein kinase roco4 ame: full=ras of complex proteins and c-terminal of roc 4;GO:0006952=>defense response=>roco4_dicdi ame: full=probable serine threonine-protein kinase roco4 ame: full=ras of complex proteins and c-terminal of roc 4;GO:0006955=>immune response=>roco4_dicdi ame: full=probable s…	PF00069=>Protein kinase domain;	IPR011009 (Protein kinase-like domain)
RirG262800	11	GO:0016301=>kinase activity=>zak1_dicdi ame: full=dual specificity protein kinase zaka ame: full=zaphod k kinase 1 short=zaphod kinase 1 ame: full=zaphod kinase a);	PF07714=>Protein tyrosine kinase;	IPR011009 (Protein kinase-like domain)
RirG237100	11	GO:0016301=>kinase activity=>roco7_dicdi ame: full=probable serine threonine-protein kinase roco7 ame: full=ras of complex proteins and c-terminal of roc 7);	PF07714=>Protein tyrosine kinase;	IPR011009 (Protein kinase-like domain)
RirG273480	11	GO:0016301=>kinase activity=>roco4_dicdi ame: full=probable serine threonine-protein kinase roco4 ame: full=ras of complex proteins and c-terminal of roc 4);	PF00069=>Protein kinase domain;	IPR011009 (Protein kinase-like domain)
RirG262930	11	GO:0002009=>morphogenesis of an epithelium=>roco4_dicdi ame: full=probable serine threonine-protein kinase roco4 ame: full=ras of complex proteins and c-terminal of roc 4;GO:0002252=>immune effector process=>roco4_dicdi ame: full=probable serine threonine-protein kinase roco4 ame: full=ras of complex proteins and c-terminal of roc 4;GO:0004709=>MAP kinase kinase kinase activity=>roco4_dicdi ame: …	PF07714=>Protein tyrosine kinase;	IPR011009 (Protein kinase-like domain)
RirG215300	11	GO:0016301=>kinase activity=>phg2_dicdi ame: full=serine threonine-protein kinase phg2);	PF00069=>Protein kinase domain;	IPR011009 (Protein kinase-like domain)
RirG162740	11	GO:0004672=>protein kinase activity=>zak1_dicdi ame: full=dual specificity protein kinase zaka ame: full=zaphod k kinase 1 short=zaphod kinase 1 ame: full=zaphod kinase a;GO:0005515=>protein binding=>zak1_dicdi ame: full=dual specificity protein kinase zaka ame: full=zaphod k kinase 1 short=zaphod kinase 1 ame: full=zaphod kinase a;GO:0005737=>cytoplasm=>zak1_dicdi ame: full=dual specificity prot…	PF07714=>Protein tyrosine kinase;	IPR011009 (Protein kinase-like domain)
RirG185740	11	GO:0016301=>kinase activity=>roco5_dicdi ame: full=probable serine threonine-protein kinase roco5 ame: full=ras of complex proteins and c-terminal of roc 5);	PF07714=>Protein tyrosine kinase;	IPR011009 (Protein kinase-like domain)
RirG248680	11	GO:0001819=>positive regulation of cytokine production=>y9963_dicdi ame: full=probable serine threonine-protein kinase ddb_g0272254;GO:0002224=>toll-like receptor signaling pathway=>y9963_dicdi ame: full=probable serine threonine-protein kinase ddb_g0272254;GO:0004672=>protein kinase activity=>y9963_dicdi ame: full=probable serine threonine-protein kinase ddb_g0272254;GO:0005515=>protein binding=…	PF00069=>Protein kinase domain;	IPR011009 (Protein kinase-like domain)
RirG264910	11	GO:0016301=>kinase activity=>yr818_mimiv ame: full= serine threonine-protein kinase receptor r818 flags: precursor);	PF07714=>Protein tyrosine kinase;	IPR011009 (Protein kinase-like domain)
RirG208470	11	GO:0002009=>morphogenesis of an epithelium=>zak1_dicdi ame: full=dual specificity protein kinase zaka ame: full=zaphod k kinase 1 short=zaphod kinase 1 ame: full=zaphod kinase a;GO:0002252=>immune effector process=>zak1_dicdi ame: full=dual specificity protein kinase zaka ame: full=zaphod k kinase 1 short=zaphod kinase 1 ame: full=zaphod kinase a;GO:0004709=>MAP kinase kinase kinase activity=>zak…	PF00069=>Protein kinase domain;	IPR011009 (Protein kinase-like domain)
RirG238090	11	GO:0000165=>MAPK cascade=>roco4_dicdi ame: full=probable serine threonine-protein kinase roco4 ame: full=ras of complex proteins and c-terminal of roc 4;GO:0001568=>blood vessel development=>roco4_dicdi ame: full=probable serine threonine-protein kinase roco4 ame: full=ras of complex proteins and c-terminal of roc 4;GO:0001934=>positive regulation of protein phosphorylation=>roco4_dicdi ame: full…	PF07714=>Protein tyrosine kinase;	IPR011009 (Protein kinase-like domain)
RirG248620	11	GO:0001817=>regulation of cytokine production=>zak1_dicdi ame: full=dual specificity protein kinase zaka ame: full=zaphod k kinase 1 short=zaphod kinase 1 ame: full=zaphod kinase a;GO:0002366=>leukocyte activation involved in immune response=>zak1_dicdi ame: full=dual specificity protein kinase zaka ame: full=zaphod k kinase 1 short=zaphod kinase 1 ame: full=zaphod kinase a;GO:0002694=>regulation…	PF07714=>Protein tyrosine kinase;	IPR011009 (Protein kinase-like domain)
RirG268600	11	GO:0000165=>MAPK cascade=>roco5_dicdi ame: full=probable serine threonine-protein kinase roco5 ame: full=ras of complex proteins and c-terminal of roc 5;GO:0000902=>cell morphogenesis=>roco5_dicdi ame: full=probable serine threonine-protein kinase roco5 ame: full=ras of complex proteins and c-terminal of roc 5;GO:0001568=>blood vessel development=>roco5_dicdi ame: full=probable serine threonine-p…	PF00069=>Protein kinase domain;PF07714=>Protein tyrosine kinase;	IPR011009 (Protein kinase-like domain)
RirG183870	11	GO:0002009=>morphogenesis of an epithelium=>roco4_dicdi ame: full=probable serine threonine-protein kinase roco4 ame: full=ras of complex proteins and c-terminal of roc 4;GO:0002252=>immune effector process=>roco4_dicdi ame: full=probable serine threonine-protein kinase roco4 ame: full=ras of complex proteins and c-terminal of roc 4;GO:0004709=>MAP kinase kinase kinase activity=>roco4_dicdi ame: …	PF00069=>Protein kinase domain;	IPR011009 (Protein kinase-like domain)
RirG202720	11	GO:0016301=>kinase activity=>pats1_dicdi ame: full=probable serine threonine-protein kinase pats1 ame: full=protein associated with the transduction of signal 1);	PF00069=>Protein kinase domain;	IPR011009 (Protein kinase-like domain)
RirG184260	11	GO:0004672=>protein kinase activity=>roco5_dicdi ame: full=probable serine threonine-protein kinase roco5 ame: full=ras of complex proteins and c-terminal of roc 5);	PF07714=>Protein tyrosine kinase;	IPR011009 (Protein kinase-like domain)
RirG273420	11	GO:0016301=>kinase activity=>zak1_dicdi ame: full=dual specificity protein kinase zaka ame: full=zaphod k kinase 1 short=zaphod kinase 1 ame: full=zaphod kinase a);	PF07714=>Protein tyrosine kinase;	IPR011009 (Protein kinase-like domain)
RirG151260	11	GO:0001816=>cytokine production=>y9844_dicdi ame: full=probable serine threonine-protein kinase ddb_g0282963;GO:0004672=>protein kinase activity=>y9844_dicdi ame: full=probable serine threonine-protein kinase ddb_g0282963;GO:0005622=>intracellular=>y9844_dicdi ame: full=probable serine threonine-protein kinase ddb_g0282963;GO:0006139=>nucleobase-containing compound metabolic process=>y9844_dicdi …	PF07714=>Protein tyrosine kinase;	IPR011009 (Protein kinase-like domain)
RirG248660	11	GO:0016301=>kinase activity=>roco5_dicdi ame: full=probable serine threonine-protein kinase roco5 ame: full=ras of complex proteins and c-terminal of roc 5);	PF07714=>Protein tyrosine kinase;	IPR011009 (Protein kinase-like domain)
RirG236680	11	GO:0016301=>kinase activity=>dusty_mouse ame: full=dual serine threonine and tyrosine protein kinase ame: full=dusty protein kinase short=dusty pk ame: full=receptor-interacting serine threonine-protein kinase 5);	PF07714=>Protein tyrosine kinase;	IPR011009 (Protein kinase-like domain)
RirG165810	11	GO:0001816=>cytokine production=>yr831_mimiv ame: full= serine threonine-protein kinase receptor r831 flags: precursor;GO:0004672=>protein kinase activity=>yr831_mimiv ame: full= serine threonine-protein kinase receptor r831 flags: precursor;GO:0005622=>intracellular=>yr831_mimiv ame: full= serine threonine-protein kinase receptor r831 flags: precursor;GO:0006139=>nucleobase-containing compound m…	PF07714=>Protein tyrosine kinase;	IPR011009 (Protein kinase-like domain)
RirG220160	11	GO:0016301=>kinase activity=>roco8_dicdi ame: full=probable serine threonine-protein kinase roco8 ame: full=ras of complex proteins and c-terminal of roc 8);	PF07714=>Protein tyrosine kinase;	IPR011009 (Protein kinase-like domain)
RirG206530	11	GO:0001934=>positive regulation of protein phosphorylation=>roco7_dicdi ame: full=probable serine threonine-protein kinase roco7 ame: full=ras of complex proteins and c-terminal of roc 7;GO:0004672=>protein kinase activity=>roco7_dicdi ame: full=probable serine threonine-protein kinase roco7 ame: full=ras of complex proteins and c-terminal of roc 7;GO:0005488=>binding=>roco7_dicdi ame: full=proba…	PF07714=>Protein tyrosine kinase;	IPR011009 (Protein kinase-like domain)
RirG177350	11	GO:0004672=>protein kinase activity=>dusty_mouse ame: full=dual serine threonine and tyrosine protein kinase ame: full=dusty protein kinase short=dusty pk ame: full=receptor-interacting serine threonine-protein kinase 5;GO:0009987=>cellular process=>dusty_mouse ame: full=dual serine threonine and tyrosine protein kinase ame: full=dusty protein kinase short=dusty pk ame: full=receptor-interacting …	PF07714=>Protein tyrosine kinase;	IPR011009 (Protein kinase-like domain)
RirG184270	11	GO:0000165=>MAPK cascade=>roco7_dicdi ame: full=probable serine threonine-protein kinase roco7 ame: full=ras of complex proteins and c-terminal of roc 7;GO:0004672=>protein kinase activity=>roco7_dicdi ame: full=probable serine threonine-protein kinase roco7 ame: full=ras of complex proteins and c-terminal of roc 7;GO:0005737=>cytoplasm=>roco7_dicdi ame: full=probable serine threonine-protein kin…	PF07714=>Protein tyrosine kinase;	IPR011009 (Protein kinase-like domain)
RirG194060	11	GO:0000186=>activation of MAPKK activity=>roco5_dicdi ame: full=probable serine threonine-protein kinase roco5 ame: full=ras of complex proteins and c-terminal of roc 5;GO:0001569=>patterning of blood vessels=>roco5_dicdi ame: full=probable serine threonine-protein kinase roco5 ame: full=ras of complex proteins and c-terminal of roc 5;GO:0001666=>response to hypoxia=>roco5_dicdi ame: full=probabl…	PF07714=>Protein tyrosine kinase;	IPR011009 (Protein kinase-like domain)
RirG265730	11	GO:0016301=>kinase activity=>zak1_dicdi ame: full=dual specificity protein kinase zaka ame: full=zaphod k kinase 1 short=zaphod kinase 1 ame: full=zaphod kinase a);	PF07714=>Protein tyrosine kinase;	IPR011009 (Protein kinase-like domain)
RirG178940	11	GO:0004672=>protein kinase activity=>dusty_pimpr ame: full=dual serine threonine and tyrosine protein kinase ame: full=dusty protein kinase short=dusty pk ame: full=receptor-interacting serine threonine-protein kinase 5;GO:0009987=>cellular process=>dusty_pimpr ame: full=dual serine threonine and tyrosine protein kinase ame: full=dusty protein kinase short=dusty pk ame: full=receptor-interacting …	PF07714=>Protein tyrosine kinase;	IPR011009 (Protein kinase-like domain)
RirG177400	11	GO:0004672=>protein kinase activity=>limk_dicdi ame: full=probable lim domain-containing serine threonine-protein kinase ddb_g0287001;GO:0005488=>binding=>limk_dicdi ame: full=probable lim domain-containing serine threonine-protein kinase ddb_g0287001;GO:0009987=>cellular process=>limk_dicdi ame: full=probable lim domain-containing serine threonine-protein kinase ddb_g0287001);	PF07714=>Protein tyrosine kinase;	IPR011009 (Protein kinase-like domain)
RirG177340	11	GO:0002009=>morphogenesis of an epithelium=>limk_dicdi ame: full=probable lim domain-containing serine threonine-protein kinase ddb_g0287001;GO:0002252=>immune effector process=>limk_dicdi ame: full=probable lim domain-containing serine threonine-protein kinase ddb_g0287001;GO:0004709=>MAP kinase kinase kinase activity=>limk_dicdi ame: full=probable lim domain-containing serine threonine-protein …	PF00069=>Protein kinase domain;	IPR011009 (Protein kinase-like domain)
RirG202730	11	GO:0002275=>myeloid cell activation involved in immune response=>zak1_dicdi ame: full=dual specificity protein kinase zaka ame: full=zaphod k kinase 1 short=zaphod kinase 1 ame: full=zaphod kinase a;GO:0002696=>positive regulation of leukocyte activation=>zak1_dicdi ame: full=dual specificity protein kinase zaka ame: full=zaphod k kinase 1 short=zaphod kinase 1 ame: full=zaphod kinase a;GO:000471…	PF07714=>Protein tyrosine kinase;	IPR011009 (Protein kinase-like domain)
RirG236690	11	GO:0016301=>kinase activity=>y9963_dicdi ame: full=probable serine threonine-protein kinase ddb_g0272254);	PF07714=>Protein tyrosine kinase;	IPR011009 (Protein kinase-like domain)
RirG244220	11	GO:0016301=>kinase activity=>zak1_dicdi ame: full=dual specificity protein kinase zaka ame: full=zaphod k kinase 1 short=zaphod kinase 1 ame: full=zaphod kinase a);	PF07714=>Protein tyrosine kinase;	IPR011009 (Protein kinase-like domain)
RirG196400	11	GO:0016301=>kinase activity=>dusty_mouse ame: full=dual serine threonine and tyrosine protein kinase ame: full=dusty protein kinase short=dusty pk ame: full=receptor-interacting serine threonine-protein kinase 5);	PF07714=>Protein tyrosine kinase;	IPR011009 (Protein kinase-like domain)
RirG234900	11	GO:0016301=>kinase activity=>roco4_dicdi ame: full=probable serine threonine-protein kinase roco4 ame: full=ras of complex proteins and c-terminal of roc 4);	PF00069=>Protein kinase domain;	IPR011009 (Protein kinase-like domain)
RirG216990	11	GO:0016301=>kinase activity=>y9963_dicdi ame: full=probable serine threonine-protein kinase ddb_g0272254);	PF00069=>Protein kinase domain;	IPR011009 (Protein kinase-like domain)
RirG221310	11	GO:0016301=>kinase activity=>roco4_dicdi ame: full=probable serine threonine-protein kinase roco4 ame: full=ras of complex proteins and c-terminal of roc 4);	PF07714=>Protein tyrosine kinase;	IPR011009 (Protein kinase-like domain)
RirG179360	11	GO:0016301=>kinase activity=>zak1_dicdi ame: full=dual specificity protein kinase zaka ame: full=zaphod k kinase 1 short=zaphod kinase 1 ame: full=zaphod kinase a);	PF00069=>Protein kinase domain;	IPR011009 (Protein kinase-like domain)
RirG194080	11	GO:0002224=>toll-like receptor signaling pathway=>roco5_dicdi ame: full=probable serine threonine-protein kinase roco5 ame: full=ras of complex proteins and c-terminal of roc 5;GO:0004672=>protein kinase activity=>roco5_dicdi ame: full=probable serine threonine-protein kinase roco5 ame: full=ras of complex proteins and c-terminal of roc 5;GO:0005488=>binding=>roco5_dicdi ame: full=probable serine…	PF07714=>Protein tyrosine kinase;	IPR011009 (Protein kinase-like domain)
RirG267700	11	GO:0016301=>kinase activity=>dusty_macmu ame: full=dual serine threonine and tyrosine protein kinase ame: full=dusty protein kinase short=dusty pk ame: full=receptor-interacting serine threonine-protein kinase 5);	PF07714=>Protein tyrosine kinase;	IPR011009 (Protein kinase-like domain)
RirG242830	11	GO:0001819=>positive regulation of cytokine production=>roco4_dicdi ame: full=probable serine threonine-protein kinase roco4 ame: full=ras of complex proteins and c-terminal of roc 4;GO:0002224=>toll-like receptor signaling pathway=>roco4_dicdi ame: full=probable serine threonine-protein kinase roco4 ame: full=ras of complex proteins and c-terminal of roc 4;GO:0004672=>protein kinase activity=>ro…	PF00069=>Protein kinase domain;	IPR011009 (Protein kinase-like domain)
RirG179210	11	GO:0004672=>protein kinase activity=>roco8_dicdi ame: full=probable serine threonine-protein kinase roco8 ame: full=ras of complex proteins and c-terminal of roc 8);	PF07714=>Protein tyrosine kinase;	IPR011009 (Protein kinase-like domain)
RirG165110	11	GO:0001819=>positive regulation of cytokine production=>zak1_dicdi ame: full=dual specificity protein kinase zaka ame: full=zaphod k kinase 1 short=zaphod kinase 1 ame: full=zaphod kinase a;GO:0002224=>toll-like receptor signaling pathway=>zak1_dicdi ame: full=dual specificity protein kinase zaka ame: full=zaphod k kinase 1 short=zaphod kinase 1 ame: full=zaphod kinase a;GO:0004672=>protein kinas…	PF07714=>Protein tyrosine kinase;	IPR011009 (Protein kinase-like domain)
RirG259800	11	GO:0004672=>protein kinase activity=>yr818_mimiv ame: full= serine threonine-protein kinase receptor r818 flags: precursor;GO:0004871=>signal transducer activity=>yr818_mimiv ame: full= serine threonine-protein kinase receptor r818 flags: precursor;GO:0005737=>cytoplasm=>yr818_mimiv ame: full= serine threonine-protein kinase receptor r818 flags: precursor;GO:0006468=>protein phosphorylation=>yr81…	PF07714=>Protein tyrosine kinase;	IPR011009 (Protein kinase-like domain)
RirG175100	11	GO:0016301=>kinase activity=>dusty_macmu ame: full=dual serine threonine and tyrosine protein kinase ame: full=dusty protein kinase short=dusty pk ame: full=receptor-interacting serine threonine-protein kinase 5);	PF07714=>Protein tyrosine kinase;	IPR011009 (Protein kinase-like domain)
RirG219540	11	GO:0004674=>protein serine/threonine kinase activity=>yr818_mimiv ame: full= serine threonine-protein kinase receptor r818 flags: precursor;GO:0006952=>defense response=>yr818_mimiv ame: full= serine threonine-protein kinase receptor r818 flags: precursor;GO:0006955=>immune response=>yr818_mimiv ame: full= serine threonine-protein kinase receptor r818 flags: precursor;GO:0007254=>JNK cascade=>yr8…	PF00069=>Protein kinase domain;	IPR011009 (Protein kinase-like domain)
RirG258960	11	GO:0002429=>immune response-activating cell surface receptor signaling pathway=>y9963_dicdi ame: full=probable serine threonine-protein kinase ddb_g0272254;GO:0004713=>protein tyrosine kinase activity=>y9963_dicdi ame: full=probable serine threonine-protein kinase ddb_g0272254;GO:0005515=>protein binding=>y9963_dicdi ame: full=probable serine threonine-protein kinase ddb_g0272254;GO:0006468=>prot…	PF00069=>Protein kinase domain;	IPR011009 (Protein kinase-like domain)
RirG148730	11	GO:0000166=>nucleotide binding=>y9844_dicdi ame: full=probable serine threonine-protein kinase ddb_g0282963;GO:0000186=>activation of MAPKK activity=>y9844_dicdi ame: full=probable serine threonine-protein kinase ddb_g0282963;GO:0001819=>positive regulation of cytokine production=>y9844_dicdi ame: full=probable serine threonine-protein kinase ddb_g0282963;GO:0002224=>toll-like receptor signaling …	PF07714=>Protein tyrosine kinase;	IPR011009 (Protein kinase-like domain)
RirG220510	11	GO:0000186=>activation of MAPKK activity=>roco7_dicdi ame: full=probable serine threonine-protein kinase roco7 ame: full=ras of complex proteins and c-terminal of roc 7;GO:0002009=>morphogenesis of an epithelium=>roco7_dicdi ame: full=probable serine threonine-protein kinase roco7 ame: full=ras of complex proteins and c-terminal of roc 7;GO:0002252=>immune effector process=>roco7_dicdi ame: full=…	PF07714=>Protein tyrosine kinase;	IPR011009 (Protein kinase-like domain)
RirG148740	11	GO:0016301=>kinase activity=>roco4_dicdi ame: full=probable serine threonine-protein kinase roco4 ame: full=ras of complex proteins and c-terminal of roc 4);	PF00069=>Protein kinase domain;	IPR011009 (Protein kinase-like domain)
RirG221290	11	GO:0004674=>protein serine/threonine kinase activity=>yr818_mimiv ame: full= serine threonine-protein kinase receptor r818 flags: precursor;GO:0006952=>defense response=>yr818_mimiv ame: full= serine threonine-protein kinase receptor r818 flags: precursor;GO:0006955=>immune response=>yr818_mimiv ame: full= serine threonine-protein kinase receptor r818 flags: precursor;GO:0007254=>JNK cascade=>yr8…	PF07714=>Protein tyrosine kinase;	IPR011009 (Protein kinase-like domain)
RirG159970	11	GO:0016301=>kinase activity=>yr826_mimiv ame: full= serine threonine-protein kinase receptor r826 flags: precursor);	PF00069=>Protein kinase domain;	IPR011009 (Protein kinase-like domain)
RirG215650	11	GO:0016301=>kinase activity=>dusty_mouse ame: full=dual serine threonine and tyrosine protein kinase ame: full=dusty protein kinase short=dusty pk ame: full=receptor-interacting serine threonine-protein kinase 5);	PF07714=>Protein tyrosine kinase;	IPR011009 (Protein kinase-like domain)
RirG188420	11	GO:0016301=>kinase activity=>zak1_dicdi ame: full=dual specificity protein kinase zaka ame: full=zaphod k kinase 1 short=zaphod kinase 1 ame: full=zaphod kinase a);	PF00069=>Protein kinase domain;	IPR011009 (Protein kinase-like domain)
RirG259870	11	GO:0004672=>protein kinase activity=>y1199_dicdi ame: full=probable serine threonine-protein kinase ddb_g0282895;GO:0009987=>cellular process=>y1199_dicdi ame: full=probable serine threonine-protein kinase ddb_g0282895;GO:0044464=>cell part=>y1199_dicdi ame: full=probable serine threonine-protein kinase ddb_g0282895);	PF00069=>Protein kinase domain;	IPR011009 (Protein kinase-like domain)
RirG223150	11	GO:0004672=>protein kinase activity=>y9963_dicdi ame: full=probable serine threonine-protein kinase ddb_g0272254;GO:0005488=>binding=>y9963_dicdi ame: full=probable serine threonine-protein kinase ddb_g0272254;GO:0016020=>membrane=>y9963_dicdi ame: full=probable serine threonine-protein kinase ddb_g0272254;GO:0032502=>developmental process=>y9963_dicdi ame: full=probable serine threonine-protein …	PF00069=>Protein kinase domain;	IPR011009 (Protein kinase-like domain)
RirG184530	11	GO:0004672=>protein kinase activity=>dusty_danre ame: full=dual serine threonine and tyrosine protein kinase ame: full=dusty protein kinase short=dusty pk ame: full=receptor-interacting serine threonine-protein kinase 5;GO:0005737=>cytoplasm=>dusty_danre ame: full=dual serine threonine and tyrosine protein kinase ame: full=dusty protein kinase short=dusty pk ame: full=receptor-interacting serine …	PF00069=>Protein kinase domain;	IPR011009 (Protein kinase-like domain)
RirG179200	11		PF00069=>Protein kinase domain;PF07714=>Protein tyrosine kinase;	IPR020685 (Tyrosine-protein kinase)
RirG179190	11	GO:0016301=>kinase activity=>dusty_rat ame: full=dual serine threonine and tyrosine protein kinase ame: full=dusty protein kinase short=dusty pk ame: full=receptor-interacting serine threonine-protein kinase 5);	PF07714=>Protein tyrosine kinase;	IPR011009 (Protein kinase-like domain)
RirG267260	11	GO:0004672=>protein kinase activity=>roco7_dicdi ame: full=probable serine threonine-protein kinase roco7 ame: full=ras of complex proteins and c-terminal of roc 7;GO:0006468=>protein phosphorylation=>roco7_dicdi ame: full=probable serine threonine-protein kinase roco7 ame: full=ras of complex proteins and c-terminal of roc 7;GO:0050794=>regulation of cellular process=>roco7_dicdi ame: full=proba…	PF07714=>Protein tyrosine kinase;	IPR011009 (Protein kinase-like domain)
RirG209250	11	GO:0016740=>transferase activity=>roco7_dicdi ame: full=probable serine threonine-protein kinase roco7 ame: full=ras of complex proteins and c-terminal of roc 7);	PF07714=>Protein tyrosine kinase;	IPR011009 (Protein kinase-like domain)
RirG150570	11	GO:0001819=>positive regulation of cytokine production=>roco4_dicdi ame: full=probable serine threonine-protein kinase roco4 ame: full=ras of complex proteins and c-terminal of roc 4;GO:0002224=>toll-like receptor signaling pathway=>roco4_dicdi ame: full=probable serine threonine-protein kinase roco4 ame: full=ras of complex proteins and c-terminal of roc 4;GO:0004672=>protein kinase activity=>ro…	PF07714=>Protein tyrosine kinase;	IPR011009 (Protein kinase-like domain)
RirG239300	11	GO:0016301=>kinase activity=>roco4_dicdi ame: full=probable serine threonine-protein kinase roco4 ame: full=ras of complex proteins and c-terminal of roc 4);	PF00069=>Protein kinase domain;	IPR011009 (Protein kinase-like domain)
RirG273640	11	GO:0016301=>kinase activity=>dusty_human ame: full=dual serine threonine and tyrosine protein kinase ame: full=dusty protein kinase short=dusty pk ame: full=rip-homologous kinase ame: full=receptor-interacting serine threonine-protein kinase 5 ame: full=sugen kinase 496 short= 496);	PF07714=>Protein tyrosine kinase;	IPR011009 (Protein kinase-like domain)
RirG273630	11	GO:0016301=>kinase activity=>dusty_pimpr ame: full=dual serine threonine and tyrosine protein kinase ame: full=dusty protein kinase short=dusty pk ame: full=receptor-interacting serine threonine-protein kinase 5);	PF00069=>Protein kinase domain;	IPR011009 (Protein kinase-like domain)
RirG272830	11	GO:0016301=>kinase activity=>roco7_dicdi ame: full=probable serine threonine-protein kinase roco7 ame: full=ras of complex proteins and c-terminal of roc 7);	PF07714=>Protein tyrosine kinase;	IPR011009 (Protein kinase-like domain)
RirG250460	11	GO:0016301=>kinase activity=>zak1_dicdi ame: full=dual specificity protein kinase zaka ame: full=zaphod k kinase 1 short=zaphod kinase 1 ame: full=zaphod kinase a);	PF00069=>Protein kinase domain;	IPR011009 (Protein kinase-like domain)
RirG241770	11	GO:0001775=>cell activation=>yr826_mimiv ame: full= serine threonine-protein kinase receptor r826 flags: precursor;GO:0004672=>protein kinase activity=>yr826_mimiv ame: full= serine threonine-protein kinase receptor r826 flags: precursor;GO:0005622=>intracellular=>yr826_mimiv ame: full= serine threonine-protein kinase receptor r826 flags: precursor;GO:0006950=>response to stress=>yr826_mimiv ame:…	PF07714=>Protein tyrosine kinase;	IPR011009 (Protein kinase-like domain)
RirG167510	11	GO:0016301=>kinase activity=>zak1_dicdi ame: full=dual specificity protein kinase zaka ame: full=zaphod k kinase 1 short=zaphod kinase 1 ame: full=zaphod kinase a);	PF07714=>Protein tyrosine kinase;	IPR011009 (Protein kinase-like domain)
RirG199500	11	GO:0016301=>kinase activity=>dusty_macmu ame: full=dual serine threonine and tyrosine protein kinase ame: full=dusty protein kinase short=dusty pk ame: full=receptor-interacting serine threonine-protein kinase 5);	PF07714=>Protein tyrosine kinase;	IPR011009 (Protein kinase-like domain)
RirG236590	11	GO:0016301=>kinase activity=>dusty_macmu ame: full=dual serine threonine and tyrosine protein kinase ame: full=dusty protein kinase short=dusty pk ame: full=receptor-interacting serine threonine-protein kinase 5);	PF07714=>Protein tyrosine kinase;	IPR011009 (Protein kinase-like domain)
RirG202750	11	GO:0004674=>protein serine/threonine kinase activity=>gdt4_dicdi ame: full=probable serine threonine-protein kinase gdt4 ame: full=growth-differentiation transition protein 4 flags: precursor;GO:0005886=>plasma membrane=>gdt4_dicdi ame: full=probable serine threonine-protein kinase gdt4 ame: full=growth-differentiation transition protein 4 flags: precursor;GO:0006468=>protein phosphorylation=>gdt…	PF00069=>Protein kinase domain;	IPR011009 (Protein kinase-like domain)
RirG272770	11	GO:0004674=>protein serine/threonine kinase activity=>zak1_dicdi ame: full=dual specificity protein kinase zaka ame: full=zaphod k kinase 1 short=zaphod kinase 1 ame: full=zaphod kinase a;GO:0006952=>defense response=>zak1_dicdi ame: full=dual specificity protein kinase zaka ame: full=zaphod k kinase 1 short=zaphod kinase 1 ame: full=zaphod kinase a;GO:0006955=>immune response=>zak1_dicdi ame: fu…	PF00069=>Protein kinase domain;	IPR011009 (Protein kinase-like domain)
RirG165800	11	GO:0016301=>kinase activity=>yr818_mimiv ame: full= serine threonine-protein kinase receptor r818 flags: precursor);	PF07714=>Protein tyrosine kinase;	IPR011009 (Protein kinase-like domain)
RirG247040	11	GO:0000165=>MAPK cascade=>dusty_macmu ame: full=dual serine threonine and tyrosine protein kinase ame: full=dusty protein kinase short=dusty pk ame: full=receptor-interacting serine threonine-protein kinase 5;GO:0004672=>protein kinase activity=>dusty_macmu ame: full=dual serine threonine and tyrosine protein kinase ame: full=dusty protein kinase short=dusty pk ame: full=receptor-interacting seri…	PF07714=>Protein tyrosine kinase;	IPR011009 (Protein kinase-like domain)
RirG250690	11	GO:0016772=>transferase activity, transferring phosphorus-containing groups=>dusty_mouse ame: full=dual serine threonine and tyrosine protein kinase ame: full=dusty protein kinase short=dusty pk ame: full=receptor-interacting serine threonine-protein kinase 5);	PF00069=>Protein kinase domain;PF07714=>Protein tyrosine kinase;	IPR020685 (Tyrosine-protein kinase)
RirG223470	11	GO:0016740=>transferase activity=>limk_dicdi ame: full=probable lim domain-containing serine threonine-protein kinase ddb_g0287001);	PF07714=>Protein tyrosine kinase;	IPR011009 (Protein kinase-like domain)
RirG214700	11	GO:0000902=>cell morphogenesis=>gdt2_dicdi ame: full=probable serine threonine-protein kinase gdt2 ame: full=growth-differentiation transition protein 2 flags: precursor;GO:0001819=>positive regulation of cytokine production=>gdt2_dicdi ame: full=probable serine threonine-protein kinase gdt2 ame: full=growth-differentiation transition protein 2 flags: precursor;GO:0002224=>toll-like receptor sign…	PF07714=>Protein tyrosine kinase;	IPR011009 (Protein kinase-like domain)
RirG173210	11	GO:0001819=>positive regulation of cytokine production=>pyk3_dicdi ame: full=dual specificity protein kinase pyk3 ame: full=tyrosine-protein kinase 3;GO:0002224=>toll-like receptor signaling pathway=>pyk3_dicdi ame: full=dual specificity protein kinase pyk3 ame: full=tyrosine-protein kinase 3;GO:0004672=>protein kinase activity=>pyk3_dicdi ame: full=dual specificity protein kinase pyk3 ame: full=…	PF07714=>Protein tyrosine kinase;	IPR011009 (Protein kinase-like domain)
RirG180270	11	GO:0002009=>morphogenesis of an epithelium=>zak1_dicdi ame: full=dual specificity protein kinase zaka ame: full=zaphod k kinase 1 short=zaphod kinase 1 ame: full=zaphod kinase a;GO:0002252=>immune effector process=>zak1_dicdi ame: full=dual specificity protein kinase zaka ame: full=zaphod k kinase 1 short=zaphod kinase 1 ame: full=zaphod kinase a;GO:0004709=>MAP kinase kinase kinase activity=>zak…	PF07714=>Protein tyrosine kinase;	IPR011009 (Protein kinase-like domain)
RirG122160	11	GO:0001819=>positive regulation of cytokine production=>yr818_mimiv ame: full= serine threonine-protein kinase receptor r818 flags: precursor;GO:0002224=>toll-like receptor signaling pathway=>yr818_mimiv ame: full= serine threonine-protein kinase receptor r818 flags: precursor;GO:0004672=>protein kinase activity=>yr818_mimiv ame: full= serine threonine-protein kinase receptor r818 flags: precurso…	PF07714=>Protein tyrosine kinase;	IPR011009 (Protein kinase-like domain)
RirG144410	11	GO:0001819=>positive regulation of cytokine production=>zak1_dicdi ame: full=dual specificity protein kinase zaka ame: full=zaphod k kinase 1 short=zaphod kinase 1 ame: full=zaphod kinase a;GO:0002224=>toll-like receptor signaling pathway=>zak1_dicdi ame: full=dual specificity protein kinase zaka ame: full=zaphod k kinase 1 short=zaphod kinase 1 ame: full=zaphod kinase a;GO:0004672=>protein kinas…	PF07714=>Protein tyrosine kinase;	IPR011009 (Protein kinase-like domain)
RirG123780	11	GO:0016301=>kinase activity=>dusty_mouse ame: full=dual serine threonine and tyrosine protein kinase ame: full=dusty protein kinase short=dusty pk ame: full=receptor-interacting serine threonine-protein kinase 5);	PF07714=>Protein tyrosine kinase;	IPR011009 (Protein kinase-like domain)
RirG128060	11	GO:0016301=>kinase activity=>roco4_dicdi ame: full=probable serine threonine-protein kinase roco4 ame: full=ras of complex proteins and c-terminal of roc 4);	PF00069=>Protein kinase domain;	IPR011009 (Protein kinase-like domain)
RirG138130	11	GO:0004674=>protein serine/threonine kinase activity=>roco4_dicdi ame: full=probable serine threonine-protein kinase roco4 ame: full=ras of complex proteins and c-terminal of roc 4;GO:0006952=>defense response=>roco4_dicdi ame: full=probable serine threonine-protein kinase roco4 ame: full=ras of complex proteins and c-terminal of roc 4;GO:0006955=>immune response=>roco4_dicdi ame: full=probable s…	PF07714=>Protein tyrosine kinase;	IPR011009 (Protein kinase-like domain)
RirG133950	11	GO:0016301=>kinase activity=>roco4_dicdi ame: full=probable serine threonine-protein kinase roco4 ame: full=ras of complex proteins and c-terminal of roc 4);	PF07714=>Protein tyrosine kinase;	IPR011009 (Protein kinase-like domain)
RirG140170	11	GO:0001819=>positive regulation of cytokine production=>roco7_dicdi ame: full=probable serine threonine-protein kinase roco7 ame: full=ras of complex proteins and c-terminal of roc 7;GO:0002224=>toll-like receptor signaling pathway=>roco7_dicdi ame: full=probable serine threonine-protein kinase roco7 ame: full=ras of complex proteins and c-terminal of roc 7;GO:0004672=>protein kinase activity=>ro…	PF07714=>Protein tyrosine kinase;	IPR011009 (Protein kinase-like domain)
RirG145940	11	GO:0016301=>kinase activity=>gdt4_dicdi ame: full=probable serine threonine-protein kinase gdt4 ame: full=growth-differentiation transition protein 4 flags: precursor);	PF07714=>Protein tyrosine kinase;	IPR011009 (Protein kinase-like domain)
RirG139360	11	GO:0002009=>morphogenesis of an epithelium=>dusty_pimpr ame: full=dual serine threonine and tyrosine protein kinase ame: full=dusty protein kinase short=dusty pk ame: full=receptor-interacting serine threonine-protein kinase 5;GO:0002252=>immune effector process=>dusty_pimpr ame: full=dual serine threonine and tyrosine protein kinase ame: full=dusty protein kinase short=dusty pk ame: full=recepto…	PF07714=>Protein tyrosine kinase;	IPR011009 (Protein kinase-like domain)
RirG144660	11	GO:0004672=>protein kinase activity=>dusty_pimpr ame: full=dual serine threonine and tyrosine protein kinase ame: full=dusty protein kinase short=dusty pk ame: full=receptor-interacting serine threonine-protein kinase 5);	PF07714=>Protein tyrosine kinase;	IPR011009 (Protein kinase-like domain)
RirG145980	11	GO:0004674=>protein serine/threonine kinase activity=>yr831_mimiv ame: full= serine threonine-protein kinase receptor r831 flags: precursor;GO:0006468=>protein phosphorylation=>yr831_mimiv ame: full= serine threonine-protein kinase receptor r831 flags: precursor;GO:0006952=>defense response=>yr831_mimiv ame: full= serine threonine-protein kinase receptor r831 flags: precursor;GO:0006955=>immune r…	PF07714=>Protein tyrosine kinase;	IPR011009 (Protein kinase-like domain)
RirG145970	11	GO:0004672=>protein kinase activity=>zak1_dicdi ame: full=dual specificity protein kinase zaka ame: full=zaphod k kinase 1 short=zaphod kinase 1 ame: full=zaphod kinase a;GO:0009987=>cellular process=>zak1_dicdi ame: full=dual specificity protein kinase zaka ame: full=zaphod k kinase 1 short=zaphod kinase 1 ame: full=zaphod kinase a);	PF00069=>Protein kinase domain;	IPR011009 (Protein kinase-like domain)
RirG215860	11	GO:0004672=>protein kinase activity=>limkb_dicdi ame: full=probable lim domain-containing serine threonine-protein kinase ddb_g0286997;GO:0044237=>cellular metabolic process=>limkb_dicdi ame: full=probable lim domain-containing serine threonine-protein kinase ddb_g0286997;GO:0044238=>primary metabolic process=>limkb_dicdi ame: full=probable lim domain-containing serine threonine-protein kinase dd…	PF00069=>Protein kinase domain;	IPR011009 (Protein kinase-like domain)
RirG185940	11	GO:0016301=>kinase activity=>zak1_dicdi ame: full=dual specificity protein kinase zaka ame: full=zaphod k kinase 1 short=zaphod kinase 1 ame: full=zaphod kinase a);	PF00069=>Protein kinase domain;	IPR011009 (Protein kinase-like domain)
RirG179380	11		PF00069=>Protein kinase domain;	IPR011009 (Protein kinase-like domain)
RirG247480	11	GO:0016301=>kinase activity=>yr818_mimiv ame: full= serine threonine-protein kinase receptor r818 flags: precursor);	PF00069=>Protein kinase domain;	IPR011009 (Protein kinase-like domain)
RirG214810	11	GO:0004672=>protein kinase activity=>dusty_mouse ame: full=dual serine threonine and tyrosine protein kinase ame: full=dusty protein kinase short=dusty pk ame: full=receptor-interacting serine threonine-protein kinase 5;GO:0044237=>cellular metabolic process=>dusty_mouse ame: full=dual serine threonine and tyrosine protein kinase ame: full=dusty protein kinase short=dusty pk ame: full=receptor-in…	PF00069=>Protein kinase domain;	IPR011009 (Protein kinase-like domain)
RirG014660	11	GO:0016301=>kinase activity=>y9844_dicdi ame: full=probable serine threonine-protein kinase ddb_g0282963);	PF07714=>Protein tyrosine kinase;	IPR011009 (Protein kinase-like domain)
RirG028250	11	GO:0016301=>kinase activity=>roco5_dicdi ame: full=probable serine threonine-protein kinase roco5 ame: full=ras of complex proteins and c-terminal of roc 5);	PF07714=>Protein tyrosine kinase;	IPR011009 (Protein kinase-like domain)
RirG014670	11	GO:0001816=>cytokine production=>zak1_dicdi ame: full=dual specificity protein kinase zaka ame: full=zaphod k kinase 1 short=zaphod kinase 1 ame: full=zaphod kinase a;GO:0002376=>immune system process=>zak1_dicdi ame: full=dual specificity protein kinase zaka ame: full=zaphod k kinase 1 short=zaphod kinase 1 ame: full=zaphod kinase a;GO:0004672=>protein kinase activity=>zak1_dicdi ame: full=dual …	PF07714=>Protein tyrosine kinase;	IPR011009 (Protein kinase-like domain)
RirG102810	11	GO:0005488=>binding=>yr818_mimiv ame: full= serine threonine-protein kinase receptor r818 flags: precursor;GO:0009987=>cellular process=>yr818_mimiv ame: full= serine threonine-protein kinase receptor r818 flags: precursor;GO:0016301=>kinase activity=>yr818_mimiv ame: full= serine threonine-protein kinase receptor r818 flags: precursor;GO:0044464=>cell part=>yr818_mimiv ame: full= serine threonin…	PF07714=>Protein tyrosine kinase;	IPR011009 (Protein kinase-like domain)
RirG071950	11	GO:0016301=>kinase activity=>y9963_dicdi ame: full=probable serine threonine-protein kinase ddb_g0272254);	PF07714=>Protein tyrosine kinase;	IPR011009 (Protein kinase-like domain)
RirG057790	11	GO:0016301=>kinase activity=>zak1_dicdi ame: full=dual specificity protein kinase zaka ame: full=zaphod k kinase 1 short=zaphod kinase 1 ame: full=zaphod kinase a);	PF07714=>Protein tyrosine kinase;	IPR011009 (Protein kinase-like domain)
RirG084700	11	GO:0002252=>immune effector process=>yr818_mimiv ame: full= serine threonine-protein kinase receptor r818 flags: precursor;GO:0004674=>protein serine/threonine kinase activity=>yr818_mimiv ame: full= serine threonine-protein kinase receptor r818 flags: precursor;GO:0005829=>cytosol=>yr818_mimiv ame: full= serine threonine-protein kinase receptor r818 flags: precursor;GO:0005886=>plasma membrane=>…	PF07714=>Protein tyrosine kinase;	IPR011009 (Protein kinase-like domain)
RirG048670	11	GO:0016301=>kinase activity=>roco5_dicdi ame: full=probable serine threonine-protein kinase roco5 ame: full=ras of complex proteins and c-terminal of roc 5);	PF07714=>Protein tyrosine kinase;	IPR011009 (Protein kinase-like domain)
RirG110360	11	GO:0016301=>kinase activity=>yr818_mimiv ame: full= serine threonine-protein kinase receptor r818 flags: precursor);	PF07714=>Protein tyrosine kinase;	IPR011009 (Protein kinase-like domain)
RirG054980	11	GO:0016301=>kinase activity=>zak1_dicdi ame: full=dual specificity protein kinase zaka ame: full=zaphod k kinase 1 short=zaphod kinase 1 ame: full=zaphod kinase a);	PF07714=>Protein tyrosine kinase;	IPR011009 (Protein kinase-like domain)
RirG115930	11	GO:0001819=>positive regulation of cytokine production=>ripk1_human ame: full=receptor-interacting serine threonine-protein kinase 1 ame: full=cell death protein rip ame: full=receptor-interacting protein 1 short=rip-1 ame: full=serine threonine-protein kinase rip;GO:0002224=>toll-like receptor signaling pathway=>ripk1_human ame: full=receptor-interacting serine threonine-protein kinase 1 ame: fu…	PF07714=>Protein tyrosine kinase;	IPR011009 (Protein kinase-like domain)
RirG114140	11	GO:0016301=>kinase activity=>y9963_dicdi ame: full=probable serine threonine-protein kinase ddb_g0272254);	PF07714=>Protein tyrosine kinase;	IPR011009 (Protein kinase-like domain)
RirG095070	11	GO:0004674=>protein serine/threonine kinase activity=>roco4_dicdi ame: full=probable serine threonine-protein kinase roco4 ame: full=ras of complex proteins and c-terminal of roc 4;GO:0006952=>defense response=>roco4_dicdi ame: full=probable serine threonine-protein kinase roco4 ame: full=ras of complex proteins and c-terminal of roc 4;GO:0006955=>immune response=>roco4_dicdi ame: full=probable s…	PF00069=>Protein kinase domain;	IPR011009 (Protein kinase-like domain)
RirG112890	11	GO:0016301=>kinase activity=>y9963_dicdi ame: full=probable serine threonine-protein kinase ddb_g0272254);	PF07714=>Protein tyrosine kinase;	IPR011009 (Protein kinase-like domain)
RirG106400	11	GO:0003008=>system process=>dusty_macmu ame: full=dual serine threonine and tyrosine protein kinase ame: full=dusty protein kinase short=dusty pk ame: full=receptor-interacting serine threonine-protein kinase 5;GO:0004672=>protein kinase activity=>dusty_macmu ame: full=dual serine threonine and tyrosine protein kinase ame: full=dusty protein kinase short=dusty pk ame: full=receptor-interacting se…	PF07714=>Protein tyrosine kinase;	IPR011009 (Protein kinase-like domain)
RirG076650	11	GO:0016301=>kinase activity=>zak1_dicdi ame: full=dual specificity protein kinase zaka ame: full=zaphod k kinase 1 short=zaphod kinase 1 ame: full=zaphod kinase a);	PF07714=>Protein tyrosine kinase;	IPR011009 (Protein kinase-like domain)
RirG071930	11	GO:0004672=>protein kinase activity=>roco5_dicdi ame: full=probable serine threonine-protein kinase roco5 ame: full=ras of complex proteins and c-terminal of roc 5);	PF07714=>Protein tyrosine kinase;	IPR011009 (Protein kinase-like domain)
RirG110310	11	GO:0016301=>kinase activity=>zak1_dicdi ame: full=dual specificity protein kinase zaka ame: full=zaphod k kinase 1 short=zaphod kinase 1 ame: full=zaphod kinase a);	PF07714=>Protein tyrosine kinase;	IPR011009 (Protein kinase-like domain)
RirG053140	11	GO:0004674=>protein serine/threonine kinase activity=>zak1_dicdi ame: full=dual specificity protein kinase zaka ame: full=zaphod k kinase 1 short=zaphod kinase 1 ame: full=zaphod kinase a;GO:0006952=>defense response=>zak1_dicdi ame: full=dual specificity protein kinase zaka ame: full=zaphod k kinase 1 short=zaphod kinase 1 ame: full=zaphod kinase a;GO:0006955=>immune response=>zak1_dicdi ame: fu…	PF07714=>Protein tyrosine kinase;	IPR011009 (Protein kinase-like domain)
RirG028550	11	GO:0016301=>kinase activity=>zak1_dicdi ame: full=dual specificity protein kinase zaka ame: full=zaphod k kinase 1 short=zaphod kinase 1 ame: full=zaphod kinase a);	PF07714=>Protein tyrosine kinase;	IPR011009 (Protein kinase-like domain)
RirG112910	11	GO:0016301=>kinase activity=>roco4_dicdi ame: full=probable serine threonine-protein kinase roco4 ame: full=ras of complex proteins and c-terminal of roc 4);	PF07714=>Protein tyrosine kinase;	IPR011009 (Protein kinase-like domain)
RirG055030	11	GO:0004672=>protein kinase activity=>roco4_dicdi ame: full=probable serine threonine-protein kinase roco4 ame: full=ras of complex proteins and c-terminal of roc 4);	PF07714=>Protein tyrosine kinase;	IPR011009 (Protein kinase-like domain)
RirG082480	11	GO:0004672=>protein kinase activity=>y9963_dicdi ame: full=probable serine threonine-protein kinase ddb_g0272254;GO:0005488=>binding=>y9963_dicdi ame: full=probable serine threonine-protein kinase ddb_g0272254;GO:0006468=>protein phosphorylation=>y9963_dicdi ame: full=probable serine threonine-protein kinase ddb_g0272254;GO:0016020=>membrane=>y9963_dicdi ame: full=probable serine threonine-protei…	PF07714=>Protein tyrosine kinase;	IPR011009 (Protein kinase-like domain)
RirG086740	11	GO:0016301=>kinase activity=>roco5_dicdi ame: full=probable serine threonine-protein kinase roco5 ame: full=ras of complex proteins and c-terminal of roc 5);	PF00069=>Protein kinase domain;	IPR011009 (Protein kinase-like domain)
RirG108780	11	GO:0004672=>protein kinase activity=>y9963_dicdi ame: full=probable serine threonine-protein kinase ddb_g0272254;GO:0005488=>binding=>y9963_dicdi ame: full=probable serine threonine-protein kinase ddb_g0272254;GO:0005622=>intracellular=>y9963_dicdi ame: full=probable serine threonine-protein kinase ddb_g0272254;GO:0006468=>protein phosphorylation=>y9963_dicdi ame: full=probable serine threonine-p…	PF07714=>Protein tyrosine kinase;	IPR011009 (Protein kinase-like domain)
RirG049050	11	GO:0016301=>kinase activity=>zak1_dicdi ame: full=dual specificity protein kinase zaka ame: full=zaphod k kinase 1 short=zaphod kinase 1 ame: full=zaphod kinase a);	PF07714=>Protein tyrosine kinase;	IPR011009 (Protein kinase-like domain)
RirG072920	11	GO:0016301=>kinase activity=>zak1_dicdi ame: full=dual specificity protein kinase zaka ame: full=zaphod k kinase 1 short=zaphod kinase 1 ame: full=zaphod kinase a);	PF07714=>Protein tyrosine kinase;	IPR011009 (Protein kinase-like domain)
RirG046380	11	GO:0016301=>kinase activity=>dusty_mouse ame: full=dual serine threonine and tyrosine protein kinase ame: full=dusty protein kinase short=dusty pk ame: full=receptor-interacting serine threonine-protein kinase 5);	PF07714=>Protein tyrosine kinase;	IPR011009 (Protein kinase-like domain)
RirG119400	11	GO:0016301=>kinase activity=>roco7_dicdi ame: full=probable serine threonine-protein kinase roco7 ame: full=ras of complex proteins and c-terminal of roc 7);	PF07714=>Protein tyrosine kinase;	IPR011009 (Protein kinase-like domain)
RirG071050	11	GO:0002376=>immune system process=>roco4_dicdi ame: full=probable serine threonine-protein kinase roco4 ame: full=ras of complex proteins and c-terminal of roc 4;GO:0004672=>protein kinase activity=>roco4_dicdi ame: full=probable serine threonine-protein kinase roco4 ame: full=ras of complex proteins and c-terminal of roc 4;GO:0006952=>defense response=>roco4_dicdi ame: full=probable serine threo…	PF07714=>Protein tyrosine kinase;	IPR011009 (Protein kinase-like domain)
RirG025860	11	GO:0016301=>kinase activity=>zak1_dicdi ame: full=dual specificity protein kinase zaka ame: full=zaphod k kinase 1 short=zaphod kinase 1 ame: full=zaphod kinase a);	PF00069=>Protein kinase domain;	IPR011009 (Protein kinase-like domain)
RirG052890	11	GO:0000165=>MAPK cascade=>zak1_dicdi ame: full=dual specificity protein kinase zaka ame: full=zaphod k kinase 1 short=zaphod kinase 1 ame: full=zaphod kinase a;GO:0001568=>blood vessel development=>zak1_dicdi ame: full=dual specificity protein kinase zaka ame: full=zaphod k kinase 1 short=zaphod kinase 1 ame: full=zaphod kinase a;GO:0001934=>positive regulation of protein phosphorylation=>zak1_di…	PF07714=>Protein tyrosine kinase;	IPR011009 (Protein kinase-like domain)
RirG067090	11	GO:0016301=>kinase activity=>zak1_dicdi ame: full=dual specificity protein kinase zaka ame: full=zaphod k kinase 1 short=zaphod kinase 1 ame: full=zaphod kinase a);	PF00069=>Protein kinase domain;	IPR011009 (Protein kinase-like domain)
RirG118420	11	GO:0016301=>kinase activity=>yr818_mimiv ame: full= serine threonine-protein kinase receptor r818 flags: precursor);	PF07714=>Protein tyrosine kinase;	IPR011009 (Protein kinase-like domain)
RirG028660	11	GO:0016301=>kinase activity=>roco7_dicdi ame: full=probable serine threonine-protein kinase roco7 ame: full=ras of complex proteins and c-terminal of roc 7);	PF00069=>Protein kinase domain;	IPR011009 (Protein kinase-like domain)
RirG096980	11	GO:0016740=>transferase activity=>zak1_dicdi ame: full=dual specificity protein kinase zaka ame: full=zaphod k kinase 1 short=zaphod kinase 1 ame: full=zaphod kinase a);	PF00069=>Protein kinase domain;	IPR011009 (Protein kinase-like domain)
RirG092490	11	GO:0016301=>kinase activity=>zak1_dicdi ame: full=dual specificity protein kinase zaka ame: full=zaphod k kinase 1 short=zaphod kinase 1 ame: full=zaphod kinase a);	PF00069=>Protein kinase domain;	IPR011009 (Protein kinase-like domain)
RirG048730	11	GO:0004672=>protein kinase activity=>roco7_dicdi ame: full=probable serine threonine-protein kinase roco7 ame: full=ras of complex proteins and c-terminal of roc 7;GO:0005488=>binding=>roco7_dicdi ame: full=probable serine threonine-protein kinase roco7 ame: full=ras of complex proteins and c-terminal of roc 7;GO:0005622=>intracellular=>roco7_dicdi ame: full=probable serine threonine-protein kina…	PF07714=>Protein tyrosine kinase;	IPR011009 (Protein kinase-like domain)
RirG047000	11	GO:0005488=>binding=>zak1_dicdi ame: full=dual specificity protein kinase zaka ame: full=zaphod k kinase 1 short=zaphod kinase 1 ame: full=zaphod kinase a;GO:0016301=>kinase activity=>zak1_dicdi ame: full=dual specificity protein kinase zaka ame: full=zaphod k kinase 1 short=zaphod kinase 1 ame: full=zaphod kinase a);	PF07714=>Protein tyrosine kinase;	IPR011009 (Protein kinase-like domain)
RirG089210	11	GO:0002275=>myeloid cell activation involved in immune response=>limk_dicdi ame: full=probable lim domain-containing serine threonine-protein kinase ddb_g0287001;GO:0002696=>positive regulation of leukocyte activation=>limk_dicdi ame: full=probable lim domain-containing serine threonine-protein kinase ddb_g0287001;GO:0004713=>protein tyrosine kinase activity=>limk_dicdi ame: full=probable lim dom…	PF07714=>Protein tyrosine kinase;	IPR011009 (Protein kinase-like domain)
RirG041460	11	GO:0004672=>protein kinase activity=>zak1_dicdi ame: full=dual specificity protein kinase zaka ame: full=zaphod k kinase 1 short=zaphod kinase 1 ame: full=zaphod kinase a;GO:0005488=>binding=>zak1_dicdi ame: full=dual specificity protein kinase zaka ame: full=zaphod k kinase 1 short=zaphod kinase 1 ame: full=zaphod kinase a;GO:0007049=>cell cycle=>zak1_dicdi ame: full=dual specificity protein kin…	PF07714=>Protein tyrosine kinase;	IPR011009 (Protein kinase-like domain)
RirG093490	11	GO:0016772=>transferase activity, transferring phosphorus-containing groups=>y9955_dicdi ame: full=probable serine threonine-protein kinase ddb_g0267514);	PF07714=>Protein tyrosine kinase;	IPR011009 (Protein kinase-like domain)
RirG029700	11	GO:0005515=>protein binding=>zak1_dicdi ame: full=dual specificity protein kinase zaka ame: full=zaphod k kinase 1 short=zaphod kinase 1 ame: full=zaphod kinase a;GO:0005737=>cytoplasm=>zak1_dicdi ame: full=dual specificity protein kinase zaka ame: full=zaphod k kinase 1 short=zaphod kinase 1 ame: full=zaphod kinase a;GO:0007166=>cell surface receptor signaling pathway=>zak1_dicdi ame: full=dual …	PF07714=>Protein tyrosine kinase;	IPR011009 (Protein kinase-like domain)
RirG062500	11	GO:0002009=>morphogenesis of an epithelium=>y1199_dicdi ame: full=probable serine threonine-protein kinase ddb_g0282895;GO:0002252=>immune effector process=>y1199_dicdi ame: full=probable serine threonine-protein kinase ddb_g0282895;GO:0004709=>MAP kinase kinase kinase activity=>y1199_dicdi ame: full=probable serine threonine-protein kinase ddb_g0282895;GO:0006468=>protein phosphorylation=>y1199_…	PF07714=>Protein tyrosine kinase;	IPR011009 (Protein kinase-like domain)
RirG041660	11	GO:0016301=>kinase activity=>pats1_dicdi ame: full=probable serine threonine-protein kinase pats1 ame: full=protein associated with the transduction of signal 1);	PF07714=>Protein tyrosine kinase;	IPR011009 (Protein kinase-like domain)
RirG078340	11	GO:0003008=>system process=>dusty_macmu ame: full=dual serine threonine and tyrosine protein kinase ame: full=dusty protein kinase short=dusty pk ame: full=receptor-interacting serine threonine-protein kinase 5;GO:0004672=>protein kinase activity=>dusty_macmu ame: full=dual serine threonine and tyrosine protein kinase ame: full=dusty protein kinase short=dusty pk ame: full=receptor-interacting se…	PF00069=>Protein kinase domain;	IPR011009 (Protein kinase-like domain)
RirG104630	11	GO:0004672=>protein kinase activity=>roco4_dicdi ame: full=probable serine threonine-protein kinase roco4 ame: full=ras of complex proteins and c-terminal of roc 4);	PF07714=>Protein tyrosine kinase;	IPR011009 (Protein kinase-like domain)
RirG037820	11	GO:0016301=>kinase activity=>dusty_macmu ame: full=dual serine threonine and tyrosine protein kinase ame: full=dusty protein kinase short=dusty pk ame: full=receptor-interacting serine threonine-protein kinase 5);	PF07714=>Protein tyrosine kinase;	IPR011009 (Protein kinase-like domain)
RirG041670	11	GO:0004674=>protein serine/threonine kinase activity=>zak1_dicdi ame: full=dual specificity protein kinase zaka ame: full=zaphod k kinase 1 short=zaphod kinase 1 ame: full=zaphod kinase a;GO:0007049=>cell cycle=>zak1_dicdi ame: full=dual specificity protein kinase zaka ame: full=zaphod k kinase 1 short=zaphod kinase 1 ame: full=zaphod kinase a;GO:0019899=>enzyme binding=>zak1_dicdi ame: full=dual…	PF00069=>Protein kinase domain;	IPR011009 (Protein kinase-like domain)
RirG107300	11	GO:0004672=>protein kinase activity=>yr826_mimiv ame: full= serine threonine-protein kinase receptor r826 flags: precursor;GO:0009987=>cellular process=>yr826_mimiv ame: full= serine threonine-protein kinase receptor r826 flags: precursor;GO:0044464=>cell part=>yr826_mimiv ame: full= serine threonine-protein kinase receptor r826 flags: precursor;GO:0044707=>single-multicellular organism process=>…	PF00069=>Protein kinase domain;	IPR011009 (Protein kinase-like domain)
RirG099820	11	GO:0016301=>kinase activity=>dusty_pimpr ame: full=dual serine threonine and tyrosine protein kinase ame: full=dusty protein kinase short=dusty pk ame: full=receptor-interacting serine threonine-protein kinase 5);	PF07714=>Protein tyrosine kinase;	IPR011009 (Protein kinase-like domain)
RirG103810	11	GO:0016301=>kinase activity=>yr818_mimiv ame: full= serine threonine-protein kinase receptor r818 flags: precursor);	PF07714=>Protein tyrosine kinase;	IPR011009 (Protein kinase-like domain)
RirG019130	11	GO:0004672=>protein kinase activity=>zak1_dicdi ame: full=dual specificity protein kinase zaka ame: full=zaphod k kinase 1 short=zaphod kinase 1 ame: full=zaphod kinase a;GO:0005488=>binding=>zak1_dicdi ame: full=dual specificity protein kinase zaka ame: full=zaphod k kinase 1 short=zaphod kinase 1 ame: full=zaphod kinase a;GO:0009987=>cellular process=>zak1_dicdi ame: full=dual specificity prote…	PF00069=>Protein kinase domain;	IPR011009 (Protein kinase-like domain)
RirG064000	11	GO:0016301=>kinase activity=>zak1_dicdi ame: full=dual specificity protein kinase zaka ame: full=zaphod k kinase 1 short=zaphod kinase 1 ame: full=zaphod kinase a;GO:0044237=>cellular metabolic process=>zak1_dicdi ame: full=dual specificity protein kinase zaka ame: full=zaphod k kinase 1 short=zaphod kinase 1 ame: full=zaphod kinase a);	PF07714=>Protein tyrosine kinase;	IPR011009 (Protein kinase-like domain)
RirG102430	11	GO:0016301=>kinase activity=>roco4_dicdi ame: full=probable serine threonine-protein kinase roco4 ame: full=ras of complex proteins and c-terminal of roc 4);	PF07714=>Protein tyrosine kinase;	IPR011009 (Protein kinase-like domain)
RirG107480	11	GO:0004672=>protein kinase activity=>roco7_dicdi ame: full=probable serine threonine-protein kinase roco7 ame: full=ras of complex proteins and c-terminal of roc 7);	PF00069=>Protein kinase domain;	IPR011009 (Protein kinase-like domain)
RirG071100	11	GO:0001816=>cytokine production=>zak1_dicdi ame: full=dual specificity protein kinase zaka ame: full=zaphod k kinase 1 short=zaphod kinase 1 ame: full=zaphod kinase a;GO:0002376=>immune system process=>zak1_dicdi ame: full=dual specificity protein kinase zaka ame: full=zaphod k kinase 1 short=zaphod kinase 1 ame: full=zaphod kinase a;GO:0004672=>protein kinase activity=>zak1_dicdi ame: full=dual …	PF07714=>Protein tyrosine kinase;	IPR011009 (Protein kinase-like domain)
RirG037860	11	GO:0002521=>leukocyte differentiation=>y9844_dicdi ame: full=probable serine threonine-protein kinase ddb_g0282963;GO:0003006=>developmental process involved in reproduction=>y9844_dicdi ame: full=probable serine threonine-protein kinase ddb_g0282963;GO:0004674=>protein serine/threonine kinase activity=>y9844_dicdi ame: full=probable serine threonine-protein kinase ddb_g0282963;GO:0004713=>protei…	PF00069=>Protein kinase domain;	IPR011009 (Protein kinase-like domain)
RirG121040	11	GO:0016301=>kinase activity=>dusty_mouse ame: full=dual serine threonine and tyrosine protein kinase ame: full=dusty protein kinase short=dusty pk ame: full=receptor-interacting serine threonine-protein kinase 5;GO:0043232=>intracellular non-membrane-bounded organelle=>dusty_mouse ame: full=dual serine threonine and tyrosine protein kinase ame: full=dusty protein kinase short=dusty pk ame: full=r…	PF00069=>Protein kinase domain;	IPR011009 (Protein kinase-like domain)
RirG082660	11	GO:0016301=>kinase activity=>dusty_human ame: full=dual serine threonine and tyrosine protein kinase ame: full=dusty protein kinase short=dusty pk ame: full=rip-homologous kinase ame: full=receptor-interacting serine threonine-protein kinase 5 ame: full=sugen kinase 496 short= 496);	PF00069=>Protein kinase domain;	IPR011009 (Protein kinase-like domain)
RirG048030	11	GO:0004672=>protein kinase activity=>roco7_dicdi ame: full=probable serine threonine-protein kinase roco7 ame: full=ras of complex proteins and c-terminal of roc 7;GO:0009987=>cellular process=>roco7_dicdi ame: full=probable serine threonine-protein kinase roco7 ame: full=ras of complex proteins and c-terminal of roc 7);	PF07714=>Protein tyrosine kinase;	IPR011009 (Protein kinase-like domain)
[truncated: 4,800 more rows]
