# Supplementary material for: Single Nucleus Genome Sequencing Reveals High Similarity among Nuclei of an Endomycorrhizal Fungus
Source: PLoS Genet. 2014 Jan 9;10(1):e1004078. doi: 10.1371/journal.pgen.1004078 (PMC3886924; doi:10.1371/journal.pgen.1004078)
Supplement: Table S10 — Summary of predicted TE elements in the R. irregularis genome. (XLSX) [file pgen.1004078.s017.xlsx]

## Sheet: Sheet1
Table S10. Summary of predicted TE elements in the R. irregularis genome.
Type	Number	Length(bp)	Percent (% of the genome)
DNA transposon	69776	16790052	11.907
LINE	26818	12652102	8.973
LTR	76378	22270815	15.794
SINE	7597	874830	0.62
Unknown	46342	8548005	6.062
Total	226911	56669300	40.191
