# Supplementary material for: Single Nucleus Genome Sequencing Reveals High Similarity among Nuclei of an Endomycorrhizal Fungus
Source: PLoS Genet. 2014 Jan 9;10(1):e1004078. doi: 10.1371/journal.pgen.1004078 (PMC3886924; doi:10.1371/journal.pgen.1004078)
Supplement: Table S11 — Protein sequences of 35 putative single copy genes used for phylogenetic analysis. GroupID numbers correspond with orthoMCL clusters in Table S5. (XLSX) [file pgen.1004078.s018.xlsx]

## Sheet: alignment
Table S11: Protein sequences of 35 putative single copy genes used for phylogenetic analysis
Species	Clade	GroupID_1021	GroupID_1070	GroupID_1160	GroupID_1194	GroupID_1280	GroupID_1304	GroupID_1313	GroupID_1363	GroupID_1725	GroupID_1956	GroupID_1975	GroupID_2192	GroupID_2213	GroupID_2217	GroupID_2227	GroupID_2231	GroupID_2248	GroupID_2342	GroupID_2348	GroupID_2366	GroupID_2656	GroupID_2697	GroupID_3038	GroupID_3089	GroupID_3092	GroupID_3141	GroupID_3146	GroupID_3158	GroupID_3634	GroupID_373	GroupID_4083	GroupID_4089	GroupID_4253	GroupID_714	GroupID_731
Aspergillus nidulans	Ascomycota	Ani0004230	Ani0003627	Ani0004558	Ani0001456	Ani0003324	Ani0000763	Ani0008920	-	-	Ani0002342	Ani0002864	Ani0008252	Ani0005031	Ani0005738	Ani0008643	Ani0003618	Ani0005492	Ani0008132	Ani0005475	Ani0006696	Ani0000833	Ani0002926	Ani0009184	Ani0005314	Ani0002950	Ani0007132	Ani0002784	Ani0008565	Ani0008370	Ani0008060	Ani0002827	Ani0008059	Ani0003370	Ani0001568	Ani0006786
Candida albicans	Ascomycota	Cal0004185	Cal0001609	Cal0001202	Cal0000518	Cal0003222	Cal0003783	Cal0005086	Cal0002193	-	-	Cal0000583	Cal0003605	Cal0001129	Cal0001331	Cal0003385	Cal0005742	Cal0003175	Cal0004665	Cal0001678	Cal0002638	Cal0001694	Cal0002293	Cal0003750	Cal0005395	Cal0005853	Cal0004959	Cal0001534	Cal0005141	Cal0002135	Cal0001440	Cal0004897	Cal0004668	Cal0003369	Cal0000925	Cal0000242
Magnaporthe oryzae	Ascomycota	70-15MGG00851	70-15MGG07316	70-15MGG14349	70-15MGG09173	70-15MGG06379	70-15MGG02804	70-15MGG08368	70-15MGG14814	70-15MGG12268	70-15MGG10565	70-15MGG07010	70-15MGG11039	70-15MGG03271	70-15MGG00876	70-15MGG03933	70-15MGG03182	70-15MGG07229	70-15MGG07119	70-15MGG04425	70-15MGG00881	70-15MGG06125	70-15MGG07132	70-15MGG02804	70-15MGG00632	70-15MGG01556	70-15MGG06505	70-15MGG00706	70-15MGG09555	70-15MGG01987	70-15MGG02449	70-15MGG12628	70-15MGG06410	70-15MGG06909	70-15MGG00685	70-15MGG08100
Neurospora crassa	Ascomycota	Ncr0005256	Ncr0001034	Ncr0007968	Ncr0004683	Ncr0005588	Ncr0006451	Ncr0007997	Ncr0006973	-	Ncr0002628	Ncr0001560	Ncr0009747	Ncr0005070	Ncr0007720	Ncr0008495	Ncr0009655	Ncr0009791	Ncr0006709	Ncr0004443	Ncr0001958	Ncr0007796	Ncr0004613	Ncr0003855	Ncr0006118	Ncr0003839	Ncr0003476	Ncr0003157	Ncr0007582	Ncr0001930	Ncr0006742	Ncr0000553	Ncr0006867	Ncr0001176	Ncr0003166	Ncr0003504
Saccharomyces cerevisiae	Ascomycota	Sce0005033	Sce0002008	Sce0004471	Sce0002470	Sce0003667	Sce0005421	Sce0005773	Sce0001261	Sce0004021	Sce0002337	-	Sce0004597	Sce0001327	Sce0003623	Sce0005568	Sce0004385	Sce0003759	Sce0004664	Sce0001715	Sce0002799	Sce0003377	Sce0000973	Sce0001122	Sce0004742	Sce0002080	Sce0000435	Sce0000132	Sce0004368	Sce0001153	Sce0002243	Sce0004717	Sce0004583	Sce0003221	Sce0000072	Sce0002471
Schizosaccharomyces pombe	Ascomycota	Spb0000772	Spb0004149	Spb0004591	Spb0002447	Spb0004994	Spb0005087	Spb0000753	Spb0003566	Spb0001030	Spb0002881	-	Spb0000828	Spb0003183	Spb0000989	Spb0003603	Spb0000948	Spb0003375	Spb0002790	Spb0001555	Spb0001904	Spb0002551	Spb0001744	Spb0002570	Spb0001277	Spb0003594	Spb0004718	Spb0004832	Spb0000210	Spb0004246	Spb0004435	Spb0003215	Spb0000656	Spb0001605	Spb0003848	Spb0001350
Tuber melanosporum	Ascomycota	Mel28GSTUM_7521001	Mel28GSTUM_4673001	Mel28GSTUM_7203001	Mel28GSTUM_5312001	Mel28GSTUM_5354001	Mel28GSTUM_12213001	Mel28GSTUM_2565001	Mel28GSTUM_2140001	Mel28GSTUM_10524001	Mel28GSTUM_4488001	Mel28GSTUM_5826001	Mel28GSTUM_10647001	Mel28GSTUM_11624001	Mel28GSTUM_15001	Mel28GSTUM_11323001	Mel28GSTUM_8672001	Mel28GSTUM_10131001	Mel28GSTUM_11605001	Mel28GSTUM_4266001	Mel28GSTUM_8006001	-	Mel28GSTUM_560001	Mel28GSTUM_11208001	Mel28GSTUM_578001	Mel28GSTUM_3840001	Mel28GSTUM_9071001	Mel28GSTUM_7656001	Mel28GSTUM_4321001	Mel28GSTUM_2039001	Mel28GSTUM_12225001	Mel28GSTUM_5889001	Mel28GSTUM_10106001	Mel28GSTUM_2678001	Mel28GSTUM_5528001	Mel28GSTUM_9327001
Laccaria bicolor	Basidiomycota	Lbi0017365	Lbi0019058	Lbi0005722	Lbi0005899	-	Lbi0002250	Lbi0007892	Lbi0017413	Lbi0012745	Lbi0012302	Lbi0009937	Lbi0015503	Lbi0016414	Lbi0005714	Lbi0003752	Lbi0008325	Lbi0007740	Lbi0011590	Lbi0005709	Lbi0016404	Lbi0021986	Lbi0005692	Lbi0010404	Lbi0012346	Lbi0011823	Lbi0018870	Lbi0003388	Lbi0012679	Lbi0008161	Lbi0003777	Lbi0005274	Lbi0011664	Lbi0001791	Lbi0007693	Lbi0020149
Puccinia graminis	Basidiomycota	Pgr0007620	Pgr0003592	Pgr0003629	Pgr0012669	Pgr0008770	Pgr0009758	-	Pgr0014057	Pgr0018453	Pgr0008500	Pgr0001348	Pgr0017043	Pgr0010023	Pgr0008441	Pgr0011030	Pgr0003756	Pgr0010088	Pgr0016102	Pgr0011536	Pgr0020534	Pgr0005944	Pgr0009167	Pgr0014935	Pgr0006438	Pgr0004309	Pgr0006820	Pgr0012759	Pgr0003362	Pgr0003631	Pgr0015532	Pgr0011271	Pgr0006958	Pgr0007955	Pgr0001852	Pgr0001894
Ustilago maydis	Basidiomycota	512UM04284	512UM05568	512UM01561	512UM00071	512UM04878	512UM03190	512UM00624	512UM01039	512UM00139	512UM00864	512UM00988	512UM01218	512UM03866	512UM04176	512UM05234	512UM05454	512UM02657	512UM04732	512UM01530	512UM03334	512UM01637	512UM05051	512UM03361	512UM04701	512UM02064	512UM06491	512UM02557	512UM04704	512UM05481	512UM05847	512UM04238	512UM00960	512UM03680	512UM05156	512UM04675
Batrachochytrium dendrobatidis	Chytridiomycota	Bde0003854	Bde0000812	Bde0001193	Bde0000901	Bde0004501	Bde0007623	Bde0006032	Bde0007913	Bde0002403	Bde0003210	Bde0005568	Bde0002439	Bde0002228	Bde0000783	Bde0006306	Bde0001748	Bde0001354	Bde0001854	Bde0005199	Bde0005703	Bde0001896	Bde0002229	Bde0004809	Bde0004255	Bde0000906	Bde0006268	Bde0000538	Bde0005207	-	Bde0008102	Bde0002371	Bde0002693	Bde0007634	Bde0001735	Bde0000664
Spizellomyces punctatus	Chytridiomycota	Spc0000368	Spc0006893	Spc0002882	Spc0000775	Spc0001412	Spc0007253	Spc0004782	Spc0004203	Spc0002265	Spc0008399	Spc0000188	Spc0007478	Spc0008755	Spc0008581	Spc0006356	Spc0001430	-	Spc0002315	Spc0002898	-	Spc0002105	Spc0008402	Spc0000991	Spc0003535	Spc0001505	Spc0000663	Spc0002989	Spc0000305	Spc0002842	Spc0006857	Spc0003641	Spc0005694	Spc0007180	Spc0003052	Spc0002305
Rozella allomycis	Cryptomycota	OG9_001350	OG9_003160	OG9_002653	OG9_003271	OG9_002107	OG9_001445	OG9_000991	OG9_001284	OG9_003326	OG9_003875	OG9_003632	OG9_002747	OG9_006285	OG9_001075	OG9_005277	OG9_002539	OG9_000009	OG9_002657	OG9_000091	OG9_005220	OG9_005257	OG9_002973	OG9_004778	OG9_004601	OG9_004790	OG9_001085	OG9_001068	OG9_000232	OG9_004347	OG9_002030	OG9_000110	OG9_003000	OG9_004676	OG9_005966	OG9_003726
Rhizophagus irregularis	Glomeromycota	RirT189920	RirT188580	RirT120130	RirT234490	RirT087660	RirT186950	RirT093980	RirT158320	RirT099190	RirT101880	RirT093360	RirT253250	RirT023620	RirT145450	RirT100130	RirT075300	RirT206130	RirT256120	RirT048350	RirT048070	RirT014100	RirT258580	RirT066920	RirT112750	RirT097910	RirT122710	RirT044130	RirT155960	RirT020210	RirT041630	RirT229190	RirT126950	RirT134540	RirT153000	RirT061910
Antonospora locustae	Microsporidia	Alo0000399	-	Alo0001223	Alo0001793	Alo0002308	Alo0001776	-	-	-	-	Alo0001708	-	-	Alo0002605	Alo0002312	Alo0000950	-	-	-	Alo0001784	Alo0000162	Alo0001279	Alo0000674	Alo0000308	Alo0002260	Alo0001617	-	-	Alo0001758	Alo0000810	Alo0001743	Alo0002350	Alo0000138	Alo0000681	Alo0002568
Enterocytozoon bieneusi	Microsporidia	Ebi0000821	Ebi0001810	Ebi0002754	-	Ebi0002631	-	-	Ebi0001699	Ebi0003105	-	Ebi0003629	-	Ebi0001838	Ebi0000984	-	-	Ebi0000358	-	Ebi0003587	Ebi0001404	Ebi0000500	Ebi0000388	Ebi0002244	Ebi0001388	Ebi0002691	Ebi0002156	Ebi0000419	Ebi0000527	Ebi0003556	Ebi0003623	Ebi0001277	Ebi0001781	Ebi0003036	Ebi0000401	Ebi0003518
Encephalitozoon cuniculi	Microsporidia	Ecu0001534	Ecu0000355	Ecu0000448	Ecu0001474	Ecu0001359	Ecu0001247	Ecu0000099	Ecu0001904	Ecu0001966	Ecu0000034	Ecu0001485	Ecu0001614	Ecu0000993	Ecu0000561	Ecu0001501	Ecu0001922	Ecu0000445	Ecu0001506	Ecu0001148	Ecu0001234	Ecu0000366	Ecu0001666	Ecu0001282	Ecu0000035	Ecu0000344	Ecu0001624	Ecu0001693	Ecu0000775	Ecu0000076	Ecu0000759	Ecu0001541	Ecu0001145	Ecu0001007	Ecu0001646	Ecu0001719
Encephalitozoon intestinalis	Microsporidia	Eit0001208	Eit0000312	Eit0000404	Eit0001178	Eit0001079	Eit0000967	Eit0000087	Eit0001581	Eit0001644	Eit0000021	Eit0001190	Eit0001312	-	Eit0000509	Eit0001241	Eit0001599	Eit0000401	Eit0001236	-	Eit0000954	Eit0000322	Eit0001363	Eit0001004	Eit0000022	Eit0000300	Eit0001322	Eit0001390	Eit0000715	Eit0000064	Eit0000697	Eit0001250	-	-	Eit0001342	Eit0001416
Nosema ceranae	Microsporidia	Nce0001682	Nce0000561	Nce0000393	Nce0000746	Nce0000049	-	Nce0001204	Nce0001116	Nce0001141	Nce0001259	Nce0000716	Nce0000056	Nce0000967	Nce0001279	Nce0001208	Nce0000073	Nce0000015	Nce0000491	Nce0000032	Nce0000888	Nce0001522	-	Nce0000821	Nce0001260	Nce0001283	Nce0000519	Nce0000524	Nce0001586	Nce0000234	Nce0000138	-	Nce0001408	Nce0000600	Nce0000264	Nce0001171
Nematocida parisii	Microsporidia	Npa0000287	Npa0001242	Npa0000860	Npa0001599	Npa0002481	-	Npa0000667	Npa0000345	Npa0000687	Npa0001263	Npa0000252	Npa0002318	Npa0001871	Npa0001598	Npa0001000	-	Npa0000333	Npa0000969	Npa0001074	Npa0000356	Npa0002013	Npa0002509	Npa0001613	Npa0002533	-	Npa0002168	-	Npa0002477	Npa0002075	Npa0000472	Npa0002331	Npa0000797	Npa0001200	Npa0000254	Npa0001657
Mucor circinelloides	Mucoromycotina	Mci0004525	Mci0006527	Mci0010098	Mci0002859	Mci0005944	Mci0009559	Mci0007287	Mci0010596	Mci0011025	-	Mci0003919	Mci0003242	Mci0005130	Mci0006676	Mci0000592	-	Mci0010029	Mci0001723	Mci0007795	Mci0006606	Mci0001503	Mci0001781	Mci0005223	Mci0010244	Mci0002797	Mci0002946	Mci0001166	Mci0005339	-	Mci0003106	Mci0007456	-	Mci0009488	Mci0005025	Mci0001551
Phycomyces blakesleeanus	Mucoromycotina	Pbl0005738	Pbl0012681	Pbl0013883	Pbl0011452	Pbl0003954	Pbl0015474	Pbl0009781	Pbl0013537	Pbl0012718	Pbl0015531	-	Pbl0006437	Pbl0004358	Pbl0012027	Pbl0014252	Pbl0009690	Pbl0001912	Pbl0008387	Pbl0005767	Pbl0007315	Pbl0011273	Pbl0011340	Pbl0001651	Pbl0003159	Pbl0003850	Pbl0002175	-	Pbl0015977	Pbl0005481	Pbl0000516	Pbl0004518	Pbl0013706	Pbl0015464	Pbl0012385	Pbl0013385
Rhizopus oryzae	Mucoromycotina	Ror0016048	Ror0006227	-	Ror0010154	Ror0001806	Ror0001471	Ror0008495	Ror0000190	Ror0014321	Ror0005467	Ror0008908	Ror0006528	Ror0001624	Ror0013569	Ror0007780	Ror0000657	Ror0006860	Ror0004040	Ror0011629	Ror0010108	Ror0001049	Ror0003421	Ror0009090	Ror0003491	Ror0003184	Ror0002522	Ror0005250	Ror0011812	Ror0003182	Ror0015902	Ror0016106	Ror0013254	Ror0001562	Ror0012927	Ror0012602
Amphimedon queenslandica	out-group	Aqu0025383	Aqu0024926	Aqu0013052	Aqu0019390	Aqu0009142	-	Aqu0026264	-	Aqu0026173	Aqu0026702	-	Aqu0018316	Aqu0029028	Aqu0025896	Aqu0023445	Aqu0023683	Aqu0027262	Aqu0021101	Aqu0012141	Aqu0018318	Aqu0028074	Aqu0024644	Aqu0023976	Aqu0026176	Aqu0014197	Aqu0024947	-	Aqu0022011	Aqu0019926	Aqu0010685	Aqu0022673	Aqu0008538	Aqu0014813	Aqu0017386	Aqu0024443
Capsaspora owczarzaki	out-group	Cwc0007645	Cwc0007182	Cwc0005600	Cwc0003529	Cwc0001286	Cwc0007138	Cwc0006242	-	Cwc0003028	-	Cwc0004227	Cwc0005904	-	Cwc0005084	Cwc0005519	Cwc0006516	Cwc0003018	Cwc0002524	Cwc0000243	Cwc0003961	Cwc0004483	Cwc0005742	-	Cwc0004419	-	Cwc0006778	Cwc0001637	Cwc0003014	Cwc0007642	Cwc0003630	Cwc0002402	Cwc0007667	-	Cwc0002800	Cwc0001483
Monosiga brevicollis	out-group	Mbr0002261	-	Mbr0002201	Mbr0002503	Mbr0006620	Mbr0002237	Mbr0003123	Mbr0002613	-	Mbr0007087	-	Mbr0006704	Mbr0006893	Mbr0004459	Mbr0006991	Mbr0008603	Mbr0007083	Mbr0008976	Mbr0007663	-	Mbr0007125	Mbr0005415	Mbr0008836	Mbr0005720	Mbr0007836	Mbr0005481	Mbr0005668	Mbr0004042	-	Mbr0002308	Mbr0006393	-	Mbr0003680	Mbr0000014	Mbr0002672
Nematostella vectensis	out-group	Nem0007728	Nem0026866	Nem0014941	Nem0015120	Nem0001708	Nem0014855	Nem0027006	Nem0006938	Nem0007808	Nem0024664	Nem0007626	Nem0005490	Nem0026216	Nem0015915	Nem0014205	Nem0015823	Nem0015139	Nem0023183	Nem0015130	Nem0014951	Nem0023714	Nem0008027	Nem0010456	Nem0015176	Nem0022881	Nem0001260	Nem0014715	Nem0026315	Nem0014794	Nem0020395	Nem0007598	Nem0002337	Nem0009491	Nem0015030	-
