# Supplementary material for: Single Nucleus Genome Sequencing Reveals High Similarity among Nuclei of an Endomycorrhizal Fungus
Source: PLoS Genet. 2014 Jan 9;10(1):e1004078. doi: 10.1371/journal.pgen.1004078 (PMC3886924; doi:10.1371/journal.pgen.1004078)
Supplement: Table S12 — P-values of competing topological hypotheses calculated using CONSEL. Based on bootstrap probability tests of sitewise likelihood values under the rtREV model calculated with RAxML; unconstrained = analysis without imposing monophyly contraint (R. irregularis forms a clade with Mucoroycotina); Dikarya = constrained analysis imposing R. irregularis to form a clade together with Dikarya; Chytridiomycota = same but with Chytridiomycota; Microsporidia = same but with Microsporidia and Cryptomycota; au = approximately unbiased test; np = multiscale bootstrap; bp = bootstrap; pp = Bayesian posterior probability; kh = Kishino-Hasegawa test; sh = Shimodaira-Hasegawa test; wkh = weighted Kishino-Hasegawa test; wsh = weighted Shimodaira-Hasegawa test. (XLSX) [file pgen.1004078.s019.xlsx]

## Sheet: RAxML_perSiteLLs
Table S12. P-values of competing topological hypotheses calculated using CONSEL
R. irregularis topological constraint	au	np	bp	pp	kh	sh	wkh	wsh
unconstrained	1	1	1	1	1	1	1	1
Dikarya	6e-41	1e-15	0	5e-95	0	0.001	0	0
Chytridiomycota	5e-05	1e-05	0	5e-178	0	0	0	0
Microsporidia	0.004	6e-08	0	3e-261	0	0	0	0
