# Supplementary material for: Single Nucleus Genome Sequencing Reveals High Similarity among Nuclei of an Endomycorrhizal Fungus
Source: PLoS Genet. 2014 Jan 9;10(1):e1004078. doi: 10.1371/journal.pgen.1004078 (PMC3886924; doi:10.1371/journal.pgen.1004078)
Supplement: Table S14 — Rhizophagus irregularis proteins with positive scores for CRN domain HMMs. Domain analysis according to Haas et al. [39], See: Material and Methods and Fig. S7. (XLSX) [file pgen.1004078.s021.xlsx]

## Sheet: Table S14 Crinklers
Table S14. R. irregularis proteins with positive scores for CRN domain HMMs.
Query	LFLAK_domain		DI		newDWL		DA		DAB		DBE		DBF		DBH		DC		DCC		DFA		DFC		DG		DJ		DM		DN10		DN17		DN5		DN7		DO		DX8		DXR		DXW		DXX		DXZ
	Score	E-value	Score	E-value	Score	E-value	Score	E-value	Score	E-value	Score	E-value	Score	E-value	Score	E-value	Score	E-value	Score	E-value	Score	E-value	Score	E-value	Score	E-value	Score	E-value	Score	E-value	Score	E-value	Score	E-value	Score	E-value	Score	E-value	Score	E-value	Score	E-value	Score	E-value	Score	E-value	Score	E-value	Score
RirT101490	55.1	3.4e-20	-4.5	5.2	9.4	0.00011	-	-	-	-	-	-	-5	0.46	-	-	-	-	-	-	-	-	-	-	-128.8	1	-	-	-	-	-	-	6.5	0.00051	-	-	-	-	-9.6	8.9	-	-	-6.1	6.9	-24.3	6.9	-157.2	3.5	-155.3
RirT030750	54.5	2.3e-15	-	-	0.8	0.077	-5.7	4.7	-	-	-	-	-	-	-	-	-	-	-	-	-	-	-	-	-	-	-	-	-	-	-	-	-	-	-	-	-	-	-	-	-	-	-	-	-	-	-	-	-
RirT101540	51.8	1.5e-14	-4.5	5.2	9.4	0.00011	-	-	-	-	-	-	-5	0.46	-	-	-	-	-	-	-	-	-	-	-128.8	1	-	-	-	-	-	-	6.5	0.00051	-	-	-	-	-9.6	8.9	-	-	-6.1	6.9	-24.3	6.9	-157.2	3.5	-155.3
RirT144060	50	1.7e-18	-7	4.5	-	-	-	-	-	-	-	-	-	-	-	-	-	-	-	-	-	-	-	-	-	-	-	-	-	-	-	-	-	-	-	-	-	-	-	-	-	-	-	-	-24.1	6.5	-	-	-6.4
RirT024030	49.7	2.3e-18	-5.3	8.3	-	-	-	-	-	-	-132.4	5.2	63.3	2.8e-25	-	-	-8.7	8	-8.8	5.6	-122.4	4	-	-	-	-	-	-	-	-	-2.2	2.3	-	-	-	-	-	-	-9.2	7	-	-	-	-	-5.6	8	-8.4	9	-
RirT115480	47.3	1.4e-17	-	-	9.8	8.2e-05	-	-	-	-	-	-	-	-	-	-	-	-	-9.6	9	-	-	-	-	-	-	-4.6	1.9	-	-	-	-	-	-	-	-	-	-	-	-	-	-	-	-	-4.5	4	-	-	-141
RirT220960	46.1	3.7e-17	-5.6	9.8	8.2	0.00027	-	-	-	-	-	-	-8.5	7.4	-	-	-	-	-	-	-	-	-8	5	-	-	-6.1	5.1	-	-	-	-	27.1	4.9e-10	-	-	-	-	-	-	-7.8	3	-	-	-	-	-161.1	5.9	-140.7
RirT167110	45.1	1.6e-12	-	-	-	-	-	-	-	-	-	-	-	-	-	-	-	-	-	-	-	-	-	-	-	-	-	-	-	-	-	-	-	-	-	-	-	-	-	-	-	-	-	-	-	-	-	-	-
RirT209650	44.9	1.8e-12	-	-	-0.7	0.24	-	-	-7.3	6.5	-	-	-	-	-	-	-	-	-	-	-8.5	8.9	-	-	-3.4	0.55	-	-	-	-	-3.4	7.4	-	-	-	-	-	-	-	-	-	-	-	-	-	-	-0.7	0.045	-7.5
RirT111980	43.6	2.5e-16	-	-	8	0.0019	-	-	-	-	-	-	-	-	-	-	-	-	-	-	-	-	-	-	-	-	-	-	-	-	-	-	-	-	-	-	-	-	-	-	-	-	-	-	-	-	-	-	-
RirT032500	42.7	4.8e-16	-3.6	3.1	-12.9	0.78	-	-	-	-	-136.3	9.5	5.7	7.2e-05	-	-	-	-	-	-	-	-	-3.1	0.24	-	-	-7.1	9.2	-	-	-3.5	5.8	-6	2.2	-	-	-	-	-	-	-	-	-5.2	3.8	-	-	-	-	-
RirT116790	40.8	3.1e-11	-7.1	4.6	9.4	0.00011	-	-	-6.7	4.5	-	-	-3.6	0.14	-	-	-	-	-359	6	-124.6	5.7	-	-	-	-	-6.7	7.3	-15.1	7.8	-3.1	6.3	5.3	0.0012	-	-	-	-	-	-	-	-	-	-	-4.8	4.8	-	-	-7.3
RirT049390	40.5	3.7e-11	0.1	0.32	2.1	0.028	-18.1	3.9	-	-	-132.8	5.6	-	-	-	-	-	-	-8.5	4.7	-	-	-	-	-	-	-	-	-	-	-	-	-157.2	1.1	-	-	-	-	-	-	-	-	-	-	-	-	-	-	-5.7
RirT075090	40.2	4.7e-11	-5.1	7.1	8.7	0.00018	-	-	-	-	-	-	-	-	-	-	-	-	-	-	-	-	-	-	-	-	-	-	-	-	-	-	-	-	-	-	-	-	-	-	-	-	-	-	-	-	-	-	-
RirT094110	40.2	3.3e-15	-4.4	4.9	4.7	0.004	-	-	-	-	-	-	-	-	-	-	-412.4	6.7	-	-	-124.2	5.4	-	-	-	-	-	-	-	-	-3.6	8.1	14.1	3.2e-06	-6.9	3.8	-4.7	3.6	-	-	-8.7	4.9	-6.4	8.4	-	-	-	-	-7.5
RirT176110	40.2	4.8e-11	-	-	-	-	-	-	-	-	-	-	-	-	-	-	-	-	-	-	-	-	-	-	-	-	-	-	-	-	-	-	-	-	-	-	-	-	-	-	-	-	-	-	-	-	-	-	-
RirT178100	40.1	5e-11	-	-	1.5	0.044	-	-	-	-	-	-	-	-	-	-	-	-	-	-	-	-	-5	0.78	-	-	-	-	-	-	-	-	-	-	-	-	-	-	-	-	-	-	-	-	-24.3	6.9	-	-	-
RirT156160	39	1.1e-10	-8.7	8	-4.1	3.1	-	-	-	-	-	-	-	-	-	-	-	-	-	-	-118.4	2.1	-	-	-	-	-	-	-	-	-	-	-	-	-	-	-	-	-	-	-	-	-	-	-	-	-6.7	2.9	-7.8
RirT198000	37.2	3.3e-14	-4.4	4.9	-	-	-6.1	6.2	-	-	-	-	-	-	-	-	-	-	-	-	-124.9	5.9	-	-	-	-	-	-	-	-	-3.1	6.4	4.7	0.0017	-6.9	3.8	-4	3.4	-	-	-	-	-	-	-	-	-	-	-8
RirT087480	36.9	4.6e-10	-	-	1.1	0.061	-5.2	3.6	-	-	-	-	-	-	-	-	-	-	-	-	-	-	-	-	-	-	-	-	-	-	-	-	-2.5	0.22	-	-	-	-	-	-	-	-	-	-	-5.3	6.9	-	-	-
RirT257920	36.3	7e-14	-	-	0.2	0.12	-	-	-	-	-	-	-	-	-	-	-	-	-	-	-	-	-	-	-	-	-	-	-14	5.5	-	-	-	-	-174.7	0.64	-6.6	7.2	-	-	-	-	-	-	-4.7	4.6	-156.7	3.2	-160
RirT234380	35.9	9.5e-14	-	-	-3.5	2	-	-	-	-	-	-	-	-	-	-	-	-	-	-	-	-	-7.8	4.5	-7.8	8.7	-	-	-	-	-	-	-	-	-8.4	9.7	-6.2	6.2	-	-	-	-	-4.5	2.4	-	-	-	-	-7.5
RirT234380.1	35.9	9.5e-14	-	-	-3.5	2	-	-	-	-	-	-	-	-	-	-	-	-	-	-	-	-	-7.8	4.5	-7.8	8.7	-	-	-	-	-	-	-	-	-8.4	9.7	-6.2	6.2	-	-	-	-	-4.5	2.4	-	-	-	-	-7.5
RirT068000	35.3	1.4e-09	-7.1	4.5	-3.1	1.5	-	-	-	-	-	-	-8.6	8	-	-	-	-	-	-	-	-	-6.4	1.9	-	-	-	-	-	-	-	-	-	-	-	-	-	-	-	-	-	-	-	-	-5.2	6.5	-	-	-
RirT030940	33.9	3.7e-09	-4.4	4.9	2.7	0.018	-6.1	6.2	-6.2	3.2	-	-	-	-	-	-	-	-	-	-	-125.8	6.9	-8.2	5.9	-	-	-	-	-	-	-3.1	6.4	13	6.7e-06	-192.2	5.9	-4.8	3.8	-269.4	8.6	-	-	-	-	-	-	-	-	-8
RirT110260	27.9	4.2e-11	-	-	-2.3	0.8	-	-	-	-	-	-	-	-	-	-	-	-	-	-	-	-	-	-	-	-	-	-	-	-	-	-	-	-	-	-	-	-	-	-	-9.9	10	-6.5	8.9	-	-	-	-	-
RirT047630	27	9e-11	-	-	-	-	-	-	-	-	-	-	-	-	-	-	-	-	-	-	-	-	-	-	-	-	-	-	-	-	-1.6	3.4	-	-	-	-	-	-	-	-	-	-	-	-	-	-	-	-	-152.2
RirT132380	26.7	1.1e-10	-6.9	4.3	-21.6	8.9	-	-	-102.7	8.7	-	-	-	-	-22.2	9.8	-	-	-	-	-	-	-	-	-	-	-	-	-	-	-	-	0.1	0.038	-192.3	6	-	-	-	-	-9.8	9.5	-5.3	4.1	-0.7	0.32	-	-	-8.3
RirT132380.1	26.7	1.1e-10	-6.9	4.3	-21.6	8.9	-	-	-102.7	8.7	-	-	-	-	-22.2	9.8	-	-	-	-	-	-	-	-	-	-	-	-	-	-	-	-	0.1	0.038	-192.3	6	-	-	-	-	-9.8	9.5	-5.3	4.1	-0.7	0.32	-	-	-8.3
RirT202520	24.6	5.5e-10	-	-	8.6	0.00021	-	-	-	-	-	-	-	-	-	-	-	-	-	-	-	-	-	-	-	-	-	-	-4.4	3.3	-	-	-	-	-6.6	3	-	-	-	-	-	-	-	-	-	-	-	-	-
RirT273490	21.9	4.4e-09	-	-	5.3	0.0024	-	-	-	-	-	-	-248.8	1	-	-	-4	0.18	-334.7	0.51	-	-	-	-	-	-	-66.5	5.5	-1.7	0.59	-2.8	5.6	-168.8	7.8	-8.1	8	-6.1	6	-	-	10.1	4.6e-05	-	-	-24.2	6.7	-4.2	0.5	-
RirT063220	16.7	2.4e-07	-3	2.1	6.1	0.0013	-6.1	6.1	-	-	-136.8	9.5	-262.5	5.8	-	-	1.7	0.0015	-8.9	5.8	-126	7	-	-	-7.3	6.7	-	-	-	-	-	-	-148	0.22	-7.2	4.4	-7	8.4	-6	0.98	-5.4	0.69	-5.1	3.5	-4.3	3.5	-1.8	0.092	-
RirT108010	13.2	3.7e-06	-2.4	1.5	-2.6	1	-19.7	6.2	-103.2	9.6	-133.1	5.8	-	-	-	-	-	-	-	-	-	-	-	-	-135.4	3.1	-	-	-5.1	5.3	-	-	-167.7	6.6	-4.6	0.85	-	-	-262.7	5.3	-	-	-5.6	5	-18.1	1	-2.8	8.4e-10	-
RirT058990	12.3	7.1e-06	-5.6	9.8	-21.4	8.3	-	-	-	-	-132.2	4.8	-	-	-	-	-	-	-	-	-	-	-6.2	1.7	-	-	-	-	-	-	-	-	-167.3	6.1	-3.2	0.32	-4.7	5.4	-	-	-	-	-	-	-24.1	6.5	27.1	1.4e-10	-
RirT146450	12	5.6e-05	-7.4	5.1	-1.5	0.44	-	-	-	-	-132	4.9	-	-	-	-	-4	0.17	-	-	-	-	-	-	-	-	-63.3	2.9	-	-	-	-	-	-	-	-	-	-	-	-	-	-	-	-	-25.4	9.5	-6.2	2.1	-159
RirT162610	11.3	1.6e-05	-7	4.4	-0.9	0.29	-5.9	5.4	-	-	-	-	-	-	-19.8	5	-	-	-	-	-	-	-	-	-	-	-	-	-	-	-3.2	6.8	-170	9.5	-8.4	9.7	-	-	-	-	-9.5	8.2	-6.6	9.9	-4.1	3.1	13.6	1.8e-06	-
RirT221070	11.3	1.5e-05	-	-	-11.6	0.54	-20.5	7.8	-	-	-	-	-254.7	2.2	-	-	-	-	-	-	-	-	-8.5	6.9	-	-	-6.6	7	-15.7	9.5	-	-	-2.8	0.26	-5.3	1.3	-3.8	3.1	-	-	-8.8	5.3	-	-	-	-	-	-	-
RirT044330	11	2e-05	-	-	8.4	0.00024	-	-	-	-	-	-	-	-	-18.7	3.7	-	-	-	-	-121.7	3.6	-	-	-137.5	4.4	-	-	-	-	-3.4	7.3	-6.8	3.7	-	-	-	-	-	-	-	-	-	-	-	-	19.2	3.6e-08	-
RirT232310	7.3	0.00033	-3.1	2.3	-20.1	6	-18.8	4.7	-97.4	3.2	-	-	-	-	-	-	-404.9	4.5	-361.4	7.6	-	-	-	-	-7.6	7.9	-7.1	9.2	-	-	-	-	-160	1.8	-	-	-	-	-	-	-	-	-	-	-22.1	3.6	14.5	9.8e-07	-
RirT238160	5.8	0.0011	-5.6	9.5	-3.5	2	-5.7	4.9	-	-	-	-	-	-	-	-	-	-	-9.7	9.6	-	-	-	-	-6.1	3.1	-7.1	9.2	-	-	-	-	-	-	0.1	0.037	-4.1	2.9	-	-	-	-	-	-	-	-	-7.3	4.3	-
RirT245780	4.9	0.0022	-	-	-	-	-18.3	4	-	-	-126	1.8	-266.1	9.1	-17.6	2.7	-417.3	8.7	-360.1	6.7	-	-	-	-	-7.3	6.5	-64	3.3	-15.5	8.7	-3.4	5.2	-7.4	5.6	-	-	-	-	-261.9	5	-	-	-	-	-21.3	2.8	10.1	2.2e-05	-
RirT157310	4.1	0.004	-4.4	4.9	-	-	-	-	-	-	-	-	-	-	-	-	-	-	-	-	-	-	-	-	-	-	-	-	-	-	-	-	11.4	1.9e-05	-	-	-	-	-	-	-	-	-	-	-5.6	8	-	-	-
	= proteins with LFLAK domain and signal peptide present
	= proteins with LFLAK domain
	= positive HMM score for LFLAK domain
	= positive HMM score for other domains
[truncated: 9 more columns]
