# Supplementary material for: Single Nucleus Genome Sequencing Reveals High Similarity among Nuclei of an Endomycorrhizal Fungus
Source: PLoS Genet. 2014 Jan 9;10(1):e1004078. doi: 10.1371/journal.pgen.1004078 (PMC3886924; doi:10.1371/journal.pgen.1004078)
Supplement: Table S15 — Primers used to verify whole genome amplification. (XLSX) [file pgen.1004078.s022.xlsx]

## Sheet: Sheet1
Table S15. Primers used to verify whole genome amplification.
amplicon	Forward primer	Reverse primer
18SrDNA	CGGGGTTAGTAGGTTGGTCA	TCTGGACCTGGTGAGTTTCC
Bg8-T3	GCCATTTCTAAAGCTTAAATGTCG	TCCACCTGGGTTACTCAACA
Bg19-T3	ATACGCTATTGGGGTTGGTG	ATGCCAGTAGACGCTCTTCC
Bg329-T3	CGCCAGACCTCTATCCATTC	GGCTGACACAGTTGCTTGAA
Bg337-T3	CGATGCCAAATATAGAGCCATT	CGTCCCCCGTTACATCATT
Bg343-T3	CTCACCGTTAGCGACTCCTC	CCAAAGAGTCCCCGTAGTCA
Bg351-T3	AAGCATCAGCCACAATTTCA	ACCACCACCTACACACACGA
Bg366-T3	CCATTGTCGCTTGTGAATTG	TGCAATCCAAGTCACGGATA
Bg367-T7	CTTGCTTTTGCTGCCTTACC	CGGCAGTGACGGATAAAGAT
BEG140	AAGGGGTGAAAAGCCAATCT	GTGGTCGTTGAGGGGTTAAA
16SrDNA	AGAGTTTGATCMTGGCTCAG	CTGCTGCSYCCCGTAG
		GACGGGCRGTGWGTRCA
		TACGGYTACCTTGTTACGACTT
